# Supplementary material for: Short-term exposure to intermittent hypoxia leads to changes in gene expression seen in chronic pulmonary disease
Source: eLife journal article supplement (doi:10.7554/elife.63003), 2021-02-18

**A**  
**Log10(Alveolar MaxFerret90 [ $\mu\text{m}$ ])**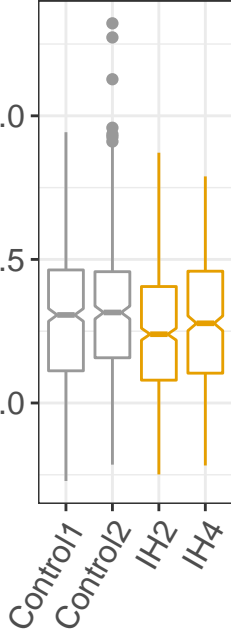**B**  
**Log10(Alveolar area [ $\mu\text{m}^2$ ])**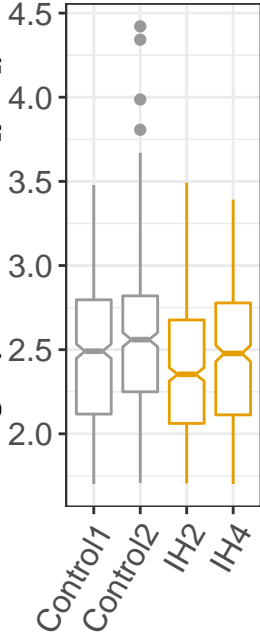**C**  
**Alveolar wall thickness [ $\mu\text{m}$ ]**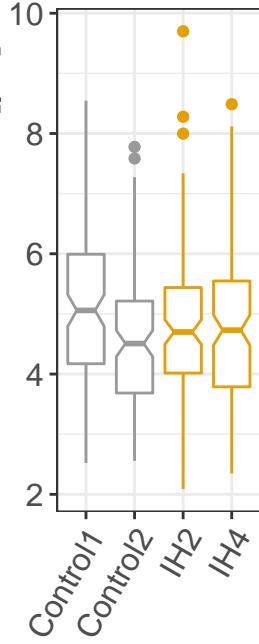

Supplement: supp [file elife-63003-supp-v1.zip]
