# Supplementary material for: Short-term exposure to intermittent hypoxia leads to changes in gene expression seen in chronic pulmonary disease
Source: eLife journal article supplement (doi:10.7554/elife.63003), 2021-02-18
Supplement: supp [file Figure3-figureSupplement1.xlsx]

## Sheet: RawData
MouseID	MeasureID	Marker	Counts
Control1	2020-01-23_60X_Control_Lung1.12_KI67_FOXF1_SFTPC_001	DAPI	253
Control1	2020-01-23_60X_Control_Lung1.12_KI67_FOXF1_SFTPC_001	KI67	14
Control1	2020-01-23_60X_Control_Lung1.12_KI67_FOXF1_SFTPC_001	FOXF1	107
Control1	2020-01-23_60X_Control_Lung1.12_KI67_FOXF1_SFTPC_001	SFTPC	35
Control1	2020-01-23_60X_Control_Lung1.12_KI67_FOXF1_SFTPC_001a	DAPI	183
Control1	2020-01-23_60X_Control_Lung1.12_KI67_FOXF1_SFTPC_001a	KI67	6
Control1	2020-01-23_60X_Control_Lung1.12_KI67_FOXF1_SFTPC_001a	FOXF1	70
Control1	2020-01-23_60X_Control_Lung1.12_KI67_FOXF1_SFTPC_001a	SFTPC	24
Control1	2020-01-23_60X_Control_Lung1.12_KI67_FOXF1_SFTPC_002	DAPI	203
Control1	2020-01-23_60X_Control_Lung1.12_KI67_FOXF1_SFTPC_002	KI67	6
Control1	2020-01-23_60X_Control_Lung1.12_KI67_FOXF1_SFTPC_002	FOXF1	69
Control1	2020-01-23_60X_Control_Lung1.12_KI67_FOXF1_SFTPC_002	SFTPC	29
Control1	2020-01-23_60X_Control_Lung1.12_KI67_FOXF1_SFTPC_002a	DAPI	182
Control1	2020-01-23_60X_Control_Lung1.12_KI67_FOXF1_SFTPC_002a	KI67	12
Control1	2020-01-23_60X_Control_Lung1.12_KI67_FOXF1_SFTPC_002a	FOXF1	98
Control1	2020-01-23_60X_Control_Lung1.12_KI67_FOXF1_SFTPC_002a	SFTPC	27
Control1	2020-01-23_60X_Control_Lung1.12_KI67_FOXF1_SFTPC_003	DAPI	159
Control1	2020-01-23_60X_Control_Lung1.12_KI67_FOXF1_SFTPC_003	KI67	4
Control1	2020-01-23_60X_Control_Lung1.12_KI67_FOXF1_SFTPC_003	FOXF1	78
Control1	2020-01-23_60X_Control_Lung1.12_KI67_FOXF1_SFTPC_003	SFTPC	24
Control1	2020-01-23_60X_Control_Lung1.12_KI67_FOXF1_SFTPC_003a	DAPI	141
Control1	2020-01-23_60X_Control_Lung1.12_KI67_FOXF1_SFTPC_003a	KI67	6
Control1	2020-01-23_60X_Control_Lung1.12_KI67_FOXF1_SFTPC_003a	FOXF1	55
Control1	2020-01-23_60X_Control_Lung1.12_KI67_FOXF1_SFTPC_003a	SFTPC	18
Control2	2020-01-28_60X_Control_Lung2.10_KI67_FOXF1_SFTPC_001	DAPI	150
Control2	2020-01-28_60X_Control_Lung2.10_KI67_FOXF1_SFTPC_001	KI67	3
Control2	2020-01-28_60X_Control_Lung2.10_KI67_FOXF1_SFTPC_001	FOXF1	83
Control2	2020-01-28_60X_Control_Lung2.10_KI67_FOXF1_SFTPC_001	SFTPC	20
Control2	2020-01-28_60X_Control_Lung2.10_KI67_FOXF1_SFTPC_001a	DAPI	213
Control2	2020-01-28_60X_Control_Lung2.10_KI67_FOXF1_SFTPC_001a	KI67	6
Control2	2020-01-28_60X_Control_Lung2.10_KI67_FOXF1_SFTPC_001a	FOXF1	101
Control2	2020-01-28_60X_Control_Lung2.10_KI67_FOXF1_SFTPC_001a	SFTPC	33
Control2	2020-01-28_60X_Control_Lung2.10_KI67_FOXF1_SFTPC_002	DAPI	255
Control2	2020-01-28_60X_Control_Lung2.10_KI67_FOXF1_SFTPC_002	KI67	5
Control2	2020-01-28_60X_Control_Lung2.10_KI67_FOXF1_SFTPC_002	FOXF1	72
Control2	2020-01-28_60X_Control_Lung2.10_KI67_FOXF1_SFTPC_002	SFTPC	38
Control2	2020-01-28_60X_Control_Lung2.10_KI67_FOXF1_SFTPC_002a	DAPI	136
Control2	2020-01-28_60X_Control_Lung2.10_KI67_FOXF1_SFTPC_002a	KI67	6
Control2	2020-01-28_60X_Control_Lung2.10_KI67_FOXF1_SFTPC_002a	FOXF1	46
Control2	2020-01-28_60X_Control_Lung2.10_KI67_FOXF1_SFTPC_002a	SFTPC	23
Control2	2020-01-28_60X_Control_Lung2.10_KI67_FOXF1_SFTPC_003	DAPI	203
Control2	2020-01-28_60X_Control_Lung2.10_KI67_FOXF1_SFTPC_003	KI67	4
Control2	2020-01-28_60X_Control_Lung2.10_KI67_FOXF1_SFTPC_003	FOXF1	109
Control2	2020-01-28_60X_Control_Lung2.10_KI67_FOXF1_SFTPC_003	SFTPC	22
Control2	2020-01-28_60X_Control_Lung2.10_KI67_FOXF1_SFTPC_003a	DAPI	245
Control2	2020-01-28_60X_Control_Lung2.10_KI67_FOXF1_SFTPC_003a	KI67	5
Control2	2020-01-28_60X_Control_Lung2.10_KI67_FOXF1_SFTPC_003a	FOXF1	114
Control2	2020-01-28_60X_Control_Lung2.10_KI67_FOXF1_SFTPC_003a	SFTPC	37
Control3	2020-01-28_60X_Control_Lung3.10_KI67_FOXF1_SFTPC_001	DAPI	177
Control3	2020-01-28_60X_Control_Lung3.10_KI67_FOXF1_SFTPC_001	KI67	2
Control3	2020-01-28_60X_Control_Lung3.10_KI67_FOXF1_SFTPC_001	FOXF1	84
Control3	2020-01-28_60X_Control_Lung3.10_KI67_FOXF1_SFTPC_001	SFTPC	24
Control3	2020-01-28_60X_Control_Lung3.10_KI67_FOXF1_SFTPC_001a	DAPI	189
Control3	2020-01-28_60X_Control_Lung3.10_KI67_FOXF1_SFTPC_001a	KI67	6
Control3	2020-01-28_60X_Control_Lung3.10_KI67_FOXF1_SFTPC_001a	FOXF1	73
Control3	2020-01-28_60X_Control_Lung3.10_KI67_FOXF1_SFTPC_001a	SFTPC	30
Control3	2020-01-28_60X_Control_Lung3.10_KI67_FOXF1_SFTPC_002	DAPI	140
Control3	2020-01-28_60X_Control_Lung3.10_KI67_FOXF1_SFTPC_002	KI67	7
Control3	2020-01-28_60X_Control_Lung3.10_KI67_FOXF1_SFTPC_002	FOXF1	51
Control3	2020-01-28_60X_Control_Lung3.10_KI67_FOXF1_SFTPC_002	SFTPC	30
Control3	2020-01-28_60X_Control_Lung3.10_KI67_FOXF1_SFTPC_002a	DAPI	180
Control3	2020-01-28_60X_Control_Lung3.10_KI67_FOXF1_SFTPC_002a	KI67	5
Control3	2020-01-28_60X_Control_Lung3.10_KI67_FOXF1_SFTPC_002a	FOXF1	58
Control3	2020-01-28_60X_Control_Lung3.10_KI67_FOXF1_SFTPC_002a	SFTPC	38
Control3	2020-01-28_60X_Control_Lung3.10_KI67_FOXF1_SFTPC_003	DAPI	246
Control3	2020-01-28_60X_Control_Lung3.10_KI67_FOXF1_SFTPC_003	KI67	4
Control3	2020-01-28_60X_Control_Lung3.10_KI67_FOXF1_SFTPC_003	FOXF1	104
Control3	2020-01-28_60X_Control_Lung3.10_KI67_FOXF1_SFTPC_003	SFTPC	25
Control3	2020-01-28_60X_Control_Lung3.10_KI67_FOXF1_SFTPC_003a	DAPI	186
Control3	2020-01-28_60X_Control_Lung3.10_KI67_FOXF1_SFTPC_003a	KI67	5
Control3	2020-01-28_60X_Control_Lung3.10_KI67_FOXF1_SFTPC_003a	FOXF1	82
Control3	2020-01-28_60X_Control_Lung3.10_KI67_FOXF1_SFTPC_003a	SFTPC	26
Control4	2020-01-28_60X_Control_Lung4.5_KI67_FOXF1_SFTPC_001	DAPI	207
Control4	2020-01-28_60X_Control_Lung4.5_KI67_FOXF1_SFTPC_001	KI67	12
Control4	2020-01-28_60X_Control_Lung4.5_KI67_FOXF1_SFTPC_001	FOXF1	49
Control4	2020-01-28_60X_Control_Lung4.5_KI67_FOXF1_SFTPC_001	SFTPC	34
Control4	2020-01-28_60X_Control_Lung4.5_KI67_FOXF1_SFTPC_001a	DAPI	190
Control4	2020-01-28_60X_Control_Lung4.5_KI67_FOXF1_SFTPC_001a	KI67	4
Control4	2020-01-28_60X_Control_Lung4.5_KI67_FOXF1_SFTPC_001a	FOXF1	69
Control4	2020-01-28_60X_Control_Lung4.5_KI67_FOXF1_SFTPC_001a	SFTPC	32
Control4	2020-01-28_60X_Control_Lung4.5_KI67_FOXF1_SFTPC_002	DAPI	195
Control4	2020-01-28_60X_Control_Lung4.5_KI67_FOXF1_SFTPC_002	KI67	7
Control4	2020-01-28_60X_Control_Lung4.5_KI67_FOXF1_SFTPC_002	FOXF1	65
Control4	2020-01-28_60X_Control_Lung4.5_KI67_FOXF1_SFTPC_002	SFTPC	32
Control4	2020-01-28_60X_Control_Lung4.5_KI67_FOXF1_SFTPC_002a	DAPI	115
Control4	2020-01-28_60X_Control_Lung4.5_KI67_FOXF1_SFTPC_002a	KI67	2
Control4	2020-01-28_60X_Control_Lung4.5_KI67_FOXF1_SFTPC_002a	FOXF1	45
Control4	2020-01-28_60X_Control_Lung4.5_KI67_FOXF1_SFTPC_002a	SFTPC	26
Control4	2020-01-28_60X_Control_Lung4.5_KI67_FOXF1_SFTPC_002a	KI67_SFTPC	1
Control4	2020-01-28_60X_Control_Lung4.5_KI67_FOXF1_SFTPC_003	DAPI	138
Control4	2020-01-28_60X_Control_Lung4.5_KI67_FOXF1_SFTPC_003	KI67	5
Control4	2020-01-28_60X_Control_Lung4.5_KI67_FOXF1_SFTPC_003	FOXF1	67
Control4	2020-01-28_60X_Control_Lung4.5_KI67_FOXF1_SFTPC_003	SFTPC	17
Control4	2020-01-28_60X_Control_Lung4.5_KI67_FOXF1_SFTPC_003a	DAPI	164
Control4	2020-01-28_60X_Control_Lung4.5_KI67_FOXF1_SFTPC_003a	KI67	4
Control4	2020-01-28_60X_Control_Lung4.5_KI67_FOXF1_SFTPC_003a	FOXF1	79
Control4	2020-01-28_60X_Control_Lung4.5_KI67_FOXF1_SFTPC_003a	SFTPC	22
IH1	2020-01-27_60X_Hypoxia_Lung1.10_KI67_FOXF1_SFTPC_001	DAPI	431
IH1	2020-01-27_60X_Hypoxia_Lung1.10_KI67_FOXF1_SFTPC_001	KI67	14
IH1	2020-01-27_60X_Hypoxia_Lung1.10_KI67_FOXF1_SFTPC_001	FOXF1	206
IH1	2020-01-27_60X_Hypoxia_Lung1.10_KI67_FOXF1_SFTPC_001	SFTPC	56
IH1	2020-01-27_60X_Hypoxia_Lung1.10_KI67_FOXF1_SFTPC_001a	DAPI	393
IH1	2020-01-27_60X_Hypoxia_Lung1.10_KI67_FOXF1_SFTPC_001a	KI67	5
IH1	2020-01-27_60X_Hypoxia_Lung1.10_KI67_FOXF1_SFTPC_001a	FOXF1	238
IH1	2020-01-27_60X_Hypoxia_Lung1.10_KI67_FOXF1_SFTPC_001a	SFTPC	71
IH1	2020-01-27_60X_Hypoxia_Lung1.10_KI67_FOXF1_SFTPC_002	DAPI	361
IH1	2020-01-27_60X_Hypoxia_Lung1.10_KI67_FOXF1_SFTPC_002	KI67	4
IH1	2020-01-27_60X_Hypoxia_Lung1.10_KI67_FOXF1_SFTPC_002	FOXF1	191
IH1	2020-01-27_60X_Hypoxia_Lung1.10_KI67_FOXF1_SFTPC_002	SFTPC	56
IH1	2020-01-27_60X_Hypoxia_Lung1.10_KI67_FOXF1_SFTPC_003	DAPI	586
IH1	2020-01-27_60X_Hypoxia_Lung1.10_KI67_FOXF1_SFTPC_003	KI67	2
IH1	2020-01-27_60X_Hypoxia_Lung1.10_KI67_FOXF1_SFTPC_003	FOXF1	168
IH1	2020-01-27_60X_Hypoxia_Lung1.10_KI67_FOXF1_SFTPC_003	SFTPC	47
IH1	2020-01-27_60X_Hypoxia_Lung1.10_KI67_FOXF1_SFTPC_003a	DAPI	693
IH1	2020-01-27_60X_Hypoxia_Lung1.10_KI67_FOXF1_SFTPC_003a	KI67	4
IH1	2020-01-27_60X_Hypoxia_Lung1.10_KI67_FOXF1_SFTPC_003a	FOXF1	201
IH1	2020-01-27_60X_Hypoxia_Lung1.10_KI67_FOXF1_SFTPC_003a	SFTPC	65
IH1	2020-01-27_60X_Hypoxia_Lung1.10_KI67_FOXF1_SFTPC_004	DAPI	374
IH1	2020-01-27_60X_Hypoxia_Lung1.10_KI67_FOXF1_SFTPC_004	KI67	5
IH1	2020-01-27_60X_Hypoxia_Lung1.10_KI67_FOXF1_SFTPC_004	FOXF1	207
IH1	2020-01-27_60X_Hypoxia_Lung1.10_KI67_FOXF1_SFTPC_004	SFTPC	68
IH2	2020-01-27_60X_Hypoxia_Lung2.1_KI67_FOXF1_SFTPC_001	DAPI	148
IH2	2020-01-27_60X_Hypoxia_Lung2.1_KI67_FOXF1_SFTPC_001	KI67	10
IH2	2020-01-27_60X_Hypoxia_Lung2.1_KI67_FOXF1_SFTPC_001	FOXF1	83
IH2	2020-01-27_60X_Hypoxia_Lung2.1_KI67_FOXF1_SFTPC_001	SFTPC	31
IH2	2020-01-27_60X_Hypoxia_Lung2.1_KI67_FOXF1_SFTPC_001a	DAPI	170
IH2	2020-01-27_60X_Hypoxia_Lung2.1_KI67_FOXF1_SFTPC_001a	KI67	5
IH2	2020-01-27_60X_Hypoxia_Lung2.1_KI67_FOXF1_SFTPC_001a	FOXF1	119
IH2	2020-01-27_60X_Hypoxia_Lung2.1_KI67_FOXF1_SFTPC_001a	SFTPC	29
IH2	2020-01-27_60X_Hypoxia_Lung2.1_KI67_FOXF1_SFTPC_002	DAPI	214
IH2	2020-01-27_60X_Hypoxia_Lung2.1_KI67_FOXF1_SFTPC_002	KI67	8
IH2	2020-01-27_60X_Hypoxia_Lung2.1_KI67_FOXF1_SFTPC_002	FOXF1	115
IH2	2020-01-27_60X_Hypoxia_Lung2.1_KI67_FOXF1_SFTPC_002	SFTPC	41
IH2	2020-01-27_60X_Hypoxia_Lung2.1_KI67_FOXF1_SFTPC_002a	DAPI	162
IH2	2020-01-27_60X_Hypoxia_Lung2.1_KI67_FOXF1_SFTPC_002a	KI67	3
IH2	2020-01-27_60X_Hypoxia_Lung2.1_KI67_FOXF1_SFTPC_002a	FOXF1	104
IH2	2020-01-27_60X_Hypoxia_Lung2.1_KI67_FOXF1_SFTPC_002a	SFTPC	47
IH2	2020-01-27_60X_Hypoxia_Lung2.1_KI67_FOXF1_SFTPC_003	DAPI	219
IH2	2020-01-27_60X_Hypoxia_Lung2.1_KI67_FOXF1_SFTPC_003	KI67	6
IH2	2020-01-27_60X_Hypoxia_Lung2.1_KI67_FOXF1_SFTPC_003	FOXF1	125
IH2	2020-01-27_60X_Hypoxia_Lung2.1_KI67_FOXF1_SFTPC_003	SFTPC	35
IH2	2020-01-27_60X_Hypoxia_Lung2.1_KI67_FOXF1_SFTPC_003a	DAPI	191
IH2	2020-01-27_60X_Hypoxia_Lung2.1_KI67_FOXF1_SFTPC_003a	KI67	11
IH2	2020-01-27_60X_Hypoxia_Lung2.1_KI67_FOXF1_SFTPC_003a	FOXF1	101
IH2	2020-01-27_60X_Hypoxia_Lung2.1_KI67_FOXF1_SFTPC_003a	SFTPC	42
IH4	2020-01-27_60X_Hypoxia_Lung4.11_KI67_FOXF1_SFTPC_001	DAPI	204
IH4	2020-01-27_60X_Hypoxia_Lung4.11_KI67_FOXF1_SFTPC_001	KI67	5
IH4	2020-01-27_60X_Hypoxia_Lung4.11_KI67_FOXF1_SFTPC_001	FOXF1	93
IH4	2020-01-27_60X_Hypoxia_Lung4.11_KI67_FOXF1_SFTPC_001	SFTPC	42
IH4	2020-01-27_60X_Hypoxia_Lung4.11_KI67_FOXF1_SFTPC_001a	DAPI	151
IH4	2020-01-27_60X_Hypoxia_Lung4.11_KI67_FOXF1_SFTPC_001a	KI67	4
IH4	2020-01-27_60X_Hypoxia_Lung4.11_KI67_FOXF1_SFTPC_001a	FOXF1	76
IH4	2020-01-27_60X_Hypoxia_Lung4.11_KI67_FOXF1_SFTPC_001a	SFTPC	38
IH4	2020-01-27_60X_Hypoxia_Lung4.11_KI67_FOXF1_SFTPC_002	DAPI	247
IH4	2020-01-27_60X_Hypoxia_Lung4.11_KI67_FOXF1_SFTPC_002	KI67	7
IH4	2020-01-27_60X_Hypoxia_Lung4.11_KI67_FOXF1_SFTPC_002	FOXF1	114
IH4	2020-01-27_60X_Hypoxia_Lung4.11_KI67_FOXF1_SFTPC_002	SFTPC	67
IH4	2020-01-27_60X_Hypoxia_Lung4.11_KI67_FOXF1_SFTPC_002a	DAPI	240
IH4	2020-01-27_60X_Hypoxia_Lung4.11_KI67_FOXF1_SFTPC_002a	KI67	13
IH4	2020-01-27_60X_Hypoxia_Lung4.11_KI67_FOXF1_SFTPC_002a	FOXF1	123
IH4	2020-01-27_60X_Hypoxia_Lung4.11_KI67_FOXF1_SFTPC_002a	SFTPC	45
IH4	2020-01-27_60X_Hypoxia_Lung4.11_KI67_FOXF1_SFTPC_003	DAPI	183
IH4	2020-01-27_60X_Hypoxia_Lung4.11_KI67_FOXF1_SFTPC_003	KI67	9
IH4	2020-01-27_60X_Hypoxia_Lung4.11_KI67_FOXF1_SFTPC_003	FOXF1	92
IH4	2020-01-27_60X_Hypoxia_Lung4.11_KI67_FOXF1_SFTPC_003	SFTPC	51
IH4	2020-01-27_60X_Hypoxia_Lung4.11_KI67_FOXF1_SFTPC_003a	DAPI	201
IH4	2020-01-27_60X_Hypoxia_Lung4.11_KI67_FOXF1_SFTPC_003a	KI67	6
IH4	2020-01-27_60X_Hypoxia_Lung4.11_KI67_FOXF1_SFTPC_003a	FOXF1	120
IH4	2020-01-27_60X_Hypoxia_Lung4.11_KI67_FOXF1_SFTPC_003a	SFTPC	34
IH5	2020-01-23_60X_Hypoxia_Lung5.10_KI67_FOXF1_SFTPC_001	DAPI	482
IH5	2020-01-23_60X_Hypoxia_Lung5.10_KI67_FOXF1_SFTPC_001	KI67	6
IH5	2020-01-23_60X_Hypoxia_Lung5.10_KI67_FOXF1_SFTPC_001	FOXF1	242
IH5	2020-01-23_60X_Hypoxia_Lung5.10_KI67_FOXF1_SFTPC_001	SFTPC	56
IH5	2020-01-23_60X_Hypoxia_Lung5.10_KI67_FOXF1_SFTPC_001a	DAPI	394
IH5	2020-01-23_60X_Hypoxia_Lung5.10_KI67_FOXF1_SFTPC_001a	KI67	5
IH5	2020-01-23_60X_Hypoxia_Lung5.10_KI67_FOXF1_SFTPC_001a	FOXF1	207
IH5	2020-01-23_60X_Hypoxia_Lung5.10_KI67_FOXF1_SFTPC_001a	SFTPC	54
IH5	2020-01-23_60X_Hypoxia_Lung5.10_KI67_FOXF1_SFTPC_002	DAPI	337
IH5	2020-01-23_60X_Hypoxia_Lung5.10_KI67_FOXF1_SFTPC_002	KI67	8
IH5	2020-01-23_60X_Hypoxia_Lung5.10_KI67_FOXF1_SFTPC_002	FOXF1	196
IH5	2020-01-23_60X_Hypoxia_Lung5.10_KI67_FOXF1_SFTPC_002	SFTPC	49
IH5	2020-01-23_60X_Hypoxia_Lung5.10_KI67_FOXF1_SFTPC_002a	DAPI	314
IH5	2020-01-23_60X_Hypoxia_Lung5.10_KI67_FOXF1_SFTPC_002a	KI67	11
IH5	2020-01-23_60X_Hypoxia_Lung5.10_KI67_FOXF1_SFTPC_002a	FOXF1	177
IH5	2020-01-23_60X_Hypoxia_Lung5.10_KI67_FOXF1_SFTPC_002a	SFTPC	41
IH5	2020-01-23_60X_Hypoxia_Lung5.10_KI67_FOXF1_SFTPC_003	DAPI	241
IH5	2020-01-23_60X_Hypoxia_Lung5.10_KI67_FOXF1_SFTPC_003	KI67	8
IH5	2020-01-23_60X_Hypoxia_Lung5.10_KI67_FOXF1_SFTPC_003	FOXF1	109
IH5	2020-01-23_60X_Hypoxia_Lung5.10_KI67_FOXF1_SFTPC_003	SFTPC	41
IH5	2020-01-23_60X_Hypoxia_Lung5.10_KI67_FOXF1_SFTPC_003a	DAPI	285
IH5	2020-01-23_60X_Hypoxia_Lung5.10_KI67_FOXF1_SFTPC_003a	KI67	11
IH5	2020-01-23_60X_Hypoxia_Lung5.10_KI67_FOXF1_SFTPC_003a	FOXF1	208
IH5	2020-01-23_60X_Hypoxia_Lung5.10_KI67_FOXF1_SFTPC_003a	SFTPC	56

## Sheet: sheet1
Note: 1 cell KI67/SFTPC in '2020-01-28_60X_Control_Lung4.5_KI67_FOXF1_SFTPC_002a'
