# Supplementary material for: Short-term exposure to intermittent hypoxia leads to changes in gene expression seen in chronic pulmonary disease
Source: eLife journal article supplement (doi:10.7554/elife.63003), 2021-02-18
Supplement: supp [file Figure3-figureSupplement2AB.xlsx]

## Sheet: Fig3S2AB
MouseID	ImageID	ObjID	Area [µm²]	MaxFeret90 [µm]
Control1	2019-12-16_20X_Control_Lung1.6_SOX9_HOPX_SFTPC_001-MaxIP	226	52.26	9.2
Control1	2019-12-16_20X_Control_Lung1.6_SOX9_HOPX_SFTPC_001-MaxIP	237	52.26	9.44
Control1	2019-12-16_20X_Control_Lung1.6_SOX9_HOPX_SFTPC_001-MaxIP	206	53.04	9.14
Control1	2019-12-16_20X_Control_Lung1.6_SOX9_HOPX_SFTPC_001-MaxIP	219	53.04	7.26
Control1	2019-12-16_20X_Control_Lung1.6_SOX9_HOPX_SFTPC_001-MaxIP	30	54.2	8.93
Control1	2019-12-16_20X_Control_Lung1.6_SOX9_HOPX_SFTPC_001-MaxIP	232	54.97	8.36
Control1	2019-12-16_20X_Control_Lung1.6_SOX9_HOPX_SFTPC_001-MaxIP	233	55.75	10.06
Control1	2019-12-16_20X_Control_Lung1.6_SOX9_HOPX_SFTPC_001-MaxIP	234	55.75	8.86
Control1	2019-12-16_20X_Control_Lung1.6_SOX9_HOPX_SFTPC_001-MaxIP	64	57.68	9.58
Control1	2019-12-16_20X_Control_Lung1.6_SOX9_HOPX_SFTPC_001-MaxIP	24	58.85	6.89
Control1	2019-12-16_20X_Control_Lung1.6_SOX9_HOPX_SFTPC_001-MaxIP	122	58.85	9.56
Control1	2019-12-16_20X_Control_Lung1.6_SOX9_HOPX_SFTPC_001-MaxIP	211	61.17	8.58
Control1	2019-12-16_20X_Control_Lung1.6_SOX9_HOPX_SFTPC_001-MaxIP	158	64.65	7.33
Control1	2019-12-16_20X_Control_Lung1.6_SOX9_HOPX_SFTPC_001-MaxIP	140	65.82	8.95
Control1	2019-12-16_20X_Control_Lung1.6_SOX9_HOPX_SFTPC_001-MaxIP	47	68.53	8.8
Control1	2019-12-16_20X_Control_Lung1.6_SOX9_HOPX_SFTPC_001-MaxIP	236	68.53	7.15
Control1	2019-12-16_20X_Control_Lung1.6_SOX9_HOPX_SFTPC_001-MaxIP	3	68.91	10.32
Control1	2019-12-16_20X_Control_Lung1.6_SOX9_HOPX_SFTPC_001-MaxIP	98	68.91	9.82
Control1	2019-12-16_20X_Control_Lung1.6_SOX9_HOPX_SFTPC_001-MaxIP	117	72.01	10.31
Control1	2019-12-16_20X_Control_Lung1.6_SOX9_HOPX_SFTPC_001-MaxIP	235	72.78	8.75
Control1	2019-12-16_20X_Control_Lung1.6_SOX9_HOPX_SFTPC_001-MaxIP	85	74.33	9.67
Control1	2019-12-16_20X_Control_Lung1.6_SOX9_HOPX_SFTPC_001-MaxIP	197	74.33	7.63
Control1	2019-12-16_20X_Control_Lung1.6_SOX9_HOPX_SFTPC_001-MaxIP	168	76.27	6.78
Control1	2019-12-16_20X_Control_Lung1.6_SOX9_HOPX_SFTPC_001-MaxIP	137	77.82	12.75
Control1	2019-12-16_20X_Control_Lung1.6_SOX9_HOPX_SFTPC_001-MaxIP	183	77.82	8.4
Control1	2019-12-16_20X_Control_Lung1.6_SOX9_HOPX_SFTPC_001-MaxIP	224	78.59	8.9
Control1	2019-12-16_20X_Control_Lung1.6_SOX9_HOPX_SFTPC_001-MaxIP	147	78.98	11.48
Control1	2019-12-16_20X_Control_Lung1.6_SOX9_HOPX_SFTPC_001-MaxIP	63	80.53	10.21
Control1	2019-12-16_20X_Control_Lung1.6_SOX9_HOPX_SFTPC_001-MaxIP	154	80.53	10.13
Control1	2019-12-16_20X_Control_Lung1.6_SOX9_HOPX_SFTPC_001-MaxIP	38	82.08	11.92
Control1	2019-12-16_20X_Control_Lung1.6_SOX9_HOPX_SFTPC_001-MaxIP	203	83.24	10.42
Control1	2019-12-16_20X_Control_Lung1.6_SOX9_HOPX_SFTPC_001-MaxIP	180	84.79	7.8
Control1	2019-12-16_20X_Control_Lung1.6_SOX9_HOPX_SFTPC_001-MaxIP	51	85.56	12.65
Control1	2019-12-16_20X_Control_Lung1.6_SOX9_HOPX_SFTPC_001-MaxIP	49	87.11	10.42
Control1	2019-12-16_20X_Control_Lung1.6_SOX9_HOPX_SFTPC_001-MaxIP	97	87.88	8.08
Control1	2019-12-16_20X_Control_Lung1.6_SOX9_HOPX_SFTPC_001-MaxIP	86	89.04	7.2
Control1	2019-12-16_20X_Control_Lung1.6_SOX9_HOPX_SFTPC_001-MaxIP	35	89.82	10
Control1	2019-12-16_20X_Control_Lung1.6_SOX9_HOPX_SFTPC_001-MaxIP	77	90.59	9.83
Control1	2019-12-16_20X_Control_Lung1.6_SOX9_HOPX_SFTPC_001-MaxIP	133	93.3	10.82
Control1	2019-12-16_20X_Control_Lung1.6_SOX9_HOPX_SFTPC_001-MaxIP	142	93.3	9.72
Control1	2019-12-16_20X_Control_Lung1.6_SOX9_HOPX_SFTPC_001-MaxIP	66	93.69	11.87
Control1	2019-12-16_20X_Control_Lung1.6_SOX9_HOPX_SFTPC_001-MaxIP	198	93.69	10.92
Control1	2019-12-16_20X_Control_Lung1.6_SOX9_HOPX_SFTPC_001-MaxIP	229	94.85	9.64
Control1	2019-12-16_20X_Control_Lung1.6_SOX9_HOPX_SFTPC_001-MaxIP	22	96.79	11.7
Control1	2019-12-16_20X_Control_Lung1.6_SOX9_HOPX_SFTPC_001-MaxIP	228	97.17	10.44
Control1	2019-12-16_20X_Control_Lung1.6_SOX9_HOPX_SFTPC_001-MaxIP	121	101.82	8.56
Control1	2019-12-16_20X_Control_Lung1.6_SOX9_HOPX_SFTPC_001-MaxIP	46	103.76	10.72
Control1	2019-12-16_20X_Control_Lung1.6_SOX9_HOPX_SFTPC_001-MaxIP	208	106.85	16.54
Control1	2019-12-16_20X_Control_Lung1.6_SOX9_HOPX_SFTPC_001-MaxIP	123	107.24	12.88
Control1	2019-12-16_20X_Control_Lung1.6_SOX9_HOPX_SFTPC_001-MaxIP	227	111.5	10.14
Control1	2019-12-16_20X_Control_Lung1.6_SOX9_HOPX_SFTPC_001-MaxIP	87	111.89	13.57
Control1	2019-12-16_20X_Control_Lung1.6_SOX9_HOPX_SFTPC_001-MaxIP	131	112.66	13.1
Control1	2019-12-16_20X_Control_Lung1.6_SOX9_HOPX_SFTPC_001-MaxIP	194	113.43	12.88
Control1	2019-12-16_20X_Control_Lung1.6_SOX9_HOPX_SFTPC_001-MaxIP	76	113.82	13.46
Control1	2019-12-16_20X_Control_Lung1.6_SOX9_HOPX_SFTPC_001-MaxIP	218	120.4	10.44
Control1	2019-12-16_20X_Control_Lung1.6_SOX9_HOPX_SFTPC_001-MaxIP	201	121.56	15.29
Control1	2019-12-16_20X_Control_Lung1.6_SOX9_HOPX_SFTPC_001-MaxIP	103	123.11	8.88
Control1	2019-12-16_20X_Control_Lung1.6_SOX9_HOPX_SFTPC_001-MaxIP	78	128.53	13.43
Control1	2019-12-16_20X_Control_Lung1.6_SOX9_HOPX_SFTPC_001-MaxIP	146	129.69	12.65
Control1	2019-12-16_20X_Control_Lung1.6_SOX9_HOPX_SFTPC_001-MaxIP	1	131.24	12.11
Control1	2019-12-16_20X_Control_Lung1.6_SOX9_HOPX_SFTPC_001-MaxIP	23	136.66	10.59
Control1	2019-12-16_20X_Control_Lung1.6_SOX9_HOPX_SFTPC_001-MaxIP	57	137.44	15.1
Control1	2019-12-16_20X_Control_Lung1.6_SOX9_HOPX_SFTPC_001-MaxIP	83	138.21	10.96
Control1	2019-12-16_20X_Control_Lung1.6_SOX9_HOPX_SFTPC_001-MaxIP	181	141.7	13.54
Control1	2019-12-16_20X_Control_Lung1.6_SOX9_HOPX_SFTPC_001-MaxIP	119	142.86	12
Control1	2019-12-16_20X_Control_Lung1.6_SOX9_HOPX_SFTPC_001-MaxIP	65	144.79	18.43
Control1	2019-12-16_20X_Control_Lung1.6_SOX9_HOPX_SFTPC_001-MaxIP	127	146.73	16.77
Control1	2019-12-16_20X_Control_Lung1.6_SOX9_HOPX_SFTPC_001-MaxIP	156	147.5	14.65
Control1	2019-12-16_20X_Control_Lung1.6_SOX9_HOPX_SFTPC_001-MaxIP	25	151.76	15.35
Control1	2019-12-16_20X_Control_Lung1.6_SOX9_HOPX_SFTPC_001-MaxIP	112	154.47	11.03
Control1	2019-12-16_20X_Control_Lung1.6_SOX9_HOPX_SFTPC_001-MaxIP	186	157.96	13.44
Control1	2019-12-16_20X_Control_Lung1.6_SOX9_HOPX_SFTPC_001-MaxIP	62	161.05	19.15
Control1	2019-12-16_20X_Control_Lung1.6_SOX9_HOPX_SFTPC_001-MaxIP	91	162.21	13.98
Control1	2019-12-16_20X_Control_Lung1.6_SOX9_HOPX_SFTPC_001-MaxIP	129	167.25	12.04
Control1	2019-12-16_20X_Control_Lung1.6_SOX9_HOPX_SFTPC_001-MaxIP	215	170.34	11.7
Control1	2019-12-16_20X_Control_Lung1.6_SOX9_HOPX_SFTPC_001-MaxIP	152	172.67	14.44
Control1	2019-12-16_20X_Control_Lung1.6_SOX9_HOPX_SFTPC_001-MaxIP	113	173.05	15.56
Control1	2019-12-16_20X_Control_Lung1.6_SOX9_HOPX_SFTPC_001-MaxIP	4	174.99	18.66
Control1	2019-12-16_20X_Control_Lung1.6_SOX9_HOPX_SFTPC_001-MaxIP	128	176.93	15.76
Control1	2019-12-16_20X_Control_Lung1.6_SOX9_HOPX_SFTPC_001-MaxIP	100	179.64	16.59
Control1	2019-12-16_20X_Control_Lung1.6_SOX9_HOPX_SFTPC_001-MaxIP	108	183.51	17.71
Control1	2019-12-16_20X_Control_Lung1.6_SOX9_HOPX_SFTPC_001-MaxIP	12	188.93	14.66
Control1	2019-12-16_20X_Control_Lung1.6_SOX9_HOPX_SFTPC_001-MaxIP	199	190.09	12.18
Control1	2019-12-16_20X_Control_Lung1.6_SOX9_HOPX_SFTPC_001-MaxIP	145	192.41	14.53
Control1	2019-12-16_20X_Control_Lung1.6_SOX9_HOPX_SFTPC_001-MaxIP	207	192.41	14.12
Control1	2019-12-16_20X_Control_Lung1.6_SOX9_HOPX_SFTPC_001-MaxIP	40	193.96	15.25
Control1	2019-12-16_20X_Control_Lung1.6_SOX9_HOPX_SFTPC_001-MaxIP	53	196.28	12.31
Control1	2019-12-16_20X_Control_Lung1.6_SOX9_HOPX_SFTPC_001-MaxIP	43	201.32	16.85
Control1	2019-12-16_20X_Control_Lung1.6_SOX9_HOPX_SFTPC_001-MaxIP	21	202.09	13.92
Control1	2019-12-16_20X_Control_Lung1.6_SOX9_HOPX_SFTPC_001-MaxIP	217	204.41	17.6
Control1	2019-12-16_20X_Control_Lung1.6_SOX9_HOPX_SFTPC_001-MaxIP	134	206.35	13.58
Control1	2019-12-16_20X_Control_Lung1.6_SOX9_HOPX_SFTPC_001-MaxIP	223	209.83	17.84
Control1	2019-12-16_20X_Control_Lung1.6_SOX9_HOPX_SFTPC_001-MaxIP	67	213.71	14.62
Control1	2019-12-16_20X_Control_Lung1.6_SOX9_HOPX_SFTPC_001-MaxIP	107	216.8	17.42
Control1	2019-12-16_20X_Control_Lung1.6_SOX9_HOPX_SFTPC_001-MaxIP	74	217.58	15.47
Control1	2019-12-16_20X_Control_Lung1.6_SOX9_HOPX_SFTPC_001-MaxIP	8	219.13	16.52
Control1	2019-12-16_20X_Control_Lung1.6_SOX9_HOPX_SFTPC_001-MaxIP	171	222.61	13.71
Control1	2019-12-16_20X_Control_Lung1.6_SOX9_HOPX_SFTPC_001-MaxIP	177	223.77	14.68
Control1	2019-12-16_20X_Control_Lung1.6_SOX9_HOPX_SFTPC_001-MaxIP	193	228.03	15.96
Control1	2019-12-16_20X_Control_Lung1.6_SOX9_HOPX_SFTPC_001-MaxIP	166	230.35	12.02
Control1	2019-12-16_20X_Control_Lung1.6_SOX9_HOPX_SFTPC_001-MaxIP	205	235	17.38
Control1	2019-12-16_20X_Control_Lung1.6_SOX9_HOPX_SFTPC_001-MaxIP	41	236.16	16.24
Control1	2019-12-16_20X_Control_Lung1.6_SOX9_HOPX_SFTPC_001-MaxIP	94	238.48	18.95
Control1	2019-12-16_20X_Control_Lung1.6_SOX9_HOPX_SFTPC_001-MaxIP	7	242.74	17.27
Control1	2019-12-16_20X_Control_Lung1.6_SOX9_HOPX_SFTPC_001-MaxIP	130	249.32	16.95
Control1	2019-12-16_20X_Control_Lung1.6_SOX9_HOPX_SFTPC_001-MaxIP	150	249.71	19.58
Control1	2019-12-16_20X_Control_Lung1.6_SOX9_HOPX_SFTPC_001-MaxIP	28	253.97	19.72
Control1	2019-12-16_20X_Control_Lung1.6_SOX9_HOPX_SFTPC_001-MaxIP	135	261.71	20.24
Control1	2019-12-16_20X_Control_Lung1.6_SOX9_HOPX_SFTPC_001-MaxIP	92	266.36	19.65
Control1	2019-12-16_20X_Control_Lung1.6_SOX9_HOPX_SFTPC_001-MaxIP	114	267.91	16.95
Control1	2019-12-16_20X_Control_Lung1.6_SOX9_HOPX_SFTPC_001-MaxIP	105	272.55	17.63
Control1	2019-12-16_20X_Control_Lung1.6_SOX9_HOPX_SFTPC_001-MaxIP	17	274.49	21.41
Control1	2019-12-16_20X_Control_Lung1.6_SOX9_HOPX_SFTPC_001-MaxIP	14	276.81	16
Control1	2019-12-16_20X_Control_Lung1.6_SOX9_HOPX_SFTPC_001-MaxIP	99	282.23	18.86
Control1	2019-12-16_20X_Control_Lung1.6_SOX9_HOPX_SFTPC_001-MaxIP	222	283.39	13.98
Control1	2019-12-16_20X_Control_Lung1.6_SOX9_HOPX_SFTPC_001-MaxIP	200	292.3	21.71
Control1	2019-12-16_20X_Control_Lung1.6_SOX9_HOPX_SFTPC_001-MaxIP	69	294.23	16.05
Control1	2019-12-16_20X_Control_Lung1.6_SOX9_HOPX_SFTPC_001-MaxIP	10	302.75	20.75
Control1	2019-12-16_20X_Control_Lung1.6_SOX9_HOPX_SFTPC_001-MaxIP	42	303.91	21.49
Control1	2019-12-16_20X_Control_Lung1.6_SOX9_HOPX_SFTPC_001-MaxIP	148	312.04	23.36
Control1	2019-12-16_20X_Control_Lung1.6_SOX9_HOPX_SFTPC_001-MaxIP	111	316.69	19.89
Control1	2019-12-16_20X_Control_Lung1.6_SOX9_HOPX_SFTPC_001-MaxIP	191	320.95	26.12
Control1	2019-12-16_20X_Control_Lung1.6_SOX9_HOPX_SFTPC_001-MaxIP	202	323.66	21.3
Control1	2019-12-16_20X_Control_Lung1.6_SOX9_HOPX_SFTPC_001-MaxIP	189	324.43	20.79
Control1	2019-12-16_20X_Control_Lung1.6_SOX9_HOPX_SFTPC_001-MaxIP	52	331.01	21.48
Control1	2019-12-16_20X_Control_Lung1.6_SOX9_HOPX_SFTPC_001-MaxIP	79	336.43	25.34
Control1	2019-12-16_20X_Control_Lung1.6_SOX9_HOPX_SFTPC_001-MaxIP	110	341.08	24.61
Control1	2019-12-16_20X_Control_Lung1.6_SOX9_HOPX_SFTPC_001-MaxIP	161	343.01	17.81
Control1	2019-12-16_20X_Control_Lung1.6_SOX9_HOPX_SFTPC_001-MaxIP	54	351.14	21.75
Control1	2019-12-16_20X_Control_Lung1.6_SOX9_HOPX_SFTPC_001-MaxIP	209	352.69	26.81
Control1	2019-12-16_20X_Control_Lung1.6_SOX9_HOPX_SFTPC_001-MaxIP	5	353.85	19.1
Control1	2019-12-16_20X_Control_Lung1.6_SOX9_HOPX_SFTPC_001-MaxIP	6	353.85	21.2
Control1	2019-12-16_20X_Control_Lung1.6_SOX9_HOPX_SFTPC_001-MaxIP	109	356.95	17.83
Control1	2019-12-16_20X_Control_Lung1.6_SOX9_HOPX_SFTPC_001-MaxIP	185	358.89	21.96
Control1	2019-12-16_20X_Control_Lung1.6_SOX9_HOPX_SFTPC_001-MaxIP	192	361.21	18.53
Control1	2019-12-16_20X_Control_Lung1.6_SOX9_HOPX_SFTPC_001-MaxIP	50	375.15	19.03
Control1	2019-12-16_20X_Control_Lung1.6_SOX9_HOPX_SFTPC_001-MaxIP	165	375.92	17.66
Control1	2019-12-16_20X_Control_Lung1.6_SOX9_HOPX_SFTPC_001-MaxIP	178	379.79	24.9
Control1	2019-12-16_20X_Control_Lung1.6_SOX9_HOPX_SFTPC_001-MaxIP	96	380.18	22.63
Control1	2019-12-16_20X_Control_Lung1.6_SOX9_HOPX_SFTPC_001-MaxIP	56	381.73	20.32
Control1	2019-12-16_20X_Control_Lung1.6_SOX9_HOPX_SFTPC_001-MaxIP	213	389.86	22.77
Control1	2019-12-16_20X_Control_Lung1.6_SOX9_HOPX_SFTPC_001-MaxIP	125	391.41	21.28
Control1	2019-12-16_20X_Control_Lung1.6_SOX9_HOPX_SFTPC_001-MaxIP	231	396.05	25.24
Control1	2019-12-16_20X_Control_Lung1.6_SOX9_HOPX_SFTPC_001-MaxIP	84	399.15	23.91
Control1	2019-12-16_20X_Control_Lung1.6_SOX9_HOPX_SFTPC_001-MaxIP	149	403.02	18.21
Control1	2019-12-16_20X_Control_Lung1.6_SOX9_HOPX_SFTPC_001-MaxIP	93	413.09	21.01
Control1	2019-12-16_20X_Control_Lung1.6_SOX9_HOPX_SFTPC_001-MaxIP	210	414.25	33.21
Control1	2019-12-16_20X_Control_Lung1.6_SOX9_HOPX_SFTPC_001-MaxIP	115	418.51	19.59
Control1	2019-12-16_20X_Control_Lung1.6_SOX9_HOPX_SFTPC_001-MaxIP	90	418.89	25.95
Control1	2019-12-16_20X_Control_Lung1.6_SOX9_HOPX_SFTPC_001-MaxIP	9	425.47	18.75
Control1	2019-12-16_20X_Control_Lung1.6_SOX9_HOPX_SFTPC_001-MaxIP	59	427.8	26.54
Control1	2019-12-16_20X_Control_Lung1.6_SOX9_HOPX_SFTPC_001-MaxIP	162	427.8	21
Control1	2019-12-16_20X_Control_Lung1.6_SOX9_HOPX_SFTPC_001-MaxIP	195	450.64	24.05
Control1	2019-12-16_20X_Control_Lung1.6_SOX9_HOPX_SFTPC_001-MaxIP	32	459.93	21.47
Control1	2019-12-16_20X_Control_Lung1.6_SOX9_HOPX_SFTPC_001-MaxIP	144	464.96	29.99
Control1	2019-12-16_20X_Control_Lung1.6_SOX9_HOPX_SFTPC_001-MaxIP	89	475.03	25.5
Control1	2019-12-16_20X_Control_Lung1.6_SOX9_HOPX_SFTPC_001-MaxIP	216	495.94	25.45
Control1	2019-12-16_20X_Control_Lung1.6_SOX9_HOPX_SFTPC_001-MaxIP	19	499.42	20.26
Control1	2019-12-16_20X_Control_Lung1.6_SOX9_HOPX_SFTPC_001-MaxIP	159	502.52	23.05
Control1	2019-12-16_20X_Control_Lung1.6_SOX9_HOPX_SFTPC_001-MaxIP	27	503.29	30.31
Control1	2019-12-16_20X_Control_Lung1.6_SOX9_HOPX_SFTPC_001-MaxIP	196	504.84	24.6
Control1	2019-12-16_20X_Control_Lung1.6_SOX9_HOPX_SFTPC_001-MaxIP	39	505.23	21.76
Control1	2019-12-16_20X_Control_Lung1.6_SOX9_HOPX_SFTPC_001-MaxIP	184	510.65	23.95
Control1	2019-12-16_20X_Control_Lung1.6_SOX9_HOPX_SFTPC_001-MaxIP	120	517.23	30
Control1	2019-12-16_20X_Control_Lung1.6_SOX9_HOPX_SFTPC_001-MaxIP	173	525.36	24.32
Control1	2019-12-16_20X_Control_Lung1.6_SOX9_HOPX_SFTPC_001-MaxIP	33	531.94	33.71
Control1	2019-12-16_20X_Control_Lung1.6_SOX9_HOPX_SFTPC_001-MaxIP	80	548.97	27.29
Control1	2019-12-16_20X_Control_Lung1.6_SOX9_HOPX_SFTPC_001-MaxIP	18	555.17	23.07
Control1	2019-12-16_20X_Control_Lung1.6_SOX9_HOPX_SFTPC_001-MaxIP	182	562.14	24.36
Control1	2019-12-16_20X_Control_Lung1.6_SOX9_HOPX_SFTPC_001-MaxIP	143	564.85	24
Control1	2019-12-16_20X_Control_Lung1.6_SOX9_HOPX_SFTPC_001-MaxIP	95	570.27	30.94
Control1	2019-12-16_20X_Control_Lung1.6_SOX9_HOPX_SFTPC_001-MaxIP	81	572.59	30.78
Control1	2019-12-16_20X_Control_Lung1.6_SOX9_HOPX_SFTPC_001-MaxIP	2	587.69	27.71
Control1	2019-12-16_20X_Control_Lung1.6_SOX9_HOPX_SFTPC_001-MaxIP	221	597.37	25.47
Control1	2019-12-16_20X_Control_Lung1.6_SOX9_HOPX_SFTPC_001-MaxIP	73	598.53	30.21
Control1	2019-12-16_20X_Control_Lung1.6_SOX9_HOPX_SFTPC_001-MaxIP	104	599.3	26.1
Control1	2019-12-16_20X_Control_Lung1.6_SOX9_HOPX_SFTPC_001-MaxIP	141	608.98	34.87
Control1	2019-12-16_20X_Control_Lung1.6_SOX9_HOPX_SFTPC_001-MaxIP	220	625.24	29.88
Control1	2019-12-16_20X_Control_Lung1.6_SOX9_HOPX_SFTPC_001-MaxIP	88	638.79	31.55
Control1	2019-12-16_20X_Control_Lung1.6_SOX9_HOPX_SFTPC_001-MaxIP	167	641.12	28.26
Control1	2019-12-16_20X_Control_Lung1.6_SOX9_HOPX_SFTPC_001-MaxIP	29	647.31	33.91
Control1	2019-12-16_20X_Control_Lung1.6_SOX9_HOPX_SFTPC_001-MaxIP	138	648.47	32.16
Control1	2019-12-16_20X_Control_Lung1.6_SOX9_HOPX_SFTPC_001-MaxIP	60	649.25	26.67
Control1	2019-12-16_20X_Control_Lung1.6_SOX9_HOPX_SFTPC_001-MaxIP	139	662.02	34.14
Control1	2019-12-16_20X_Control_Lung1.6_SOX9_HOPX_SFTPC_001-MaxIP	13	669.38	28.83
Control1	2019-12-16_20X_Control_Lung1.6_SOX9_HOPX_SFTPC_001-MaxIP	116	671.7	32.35
Control1	2019-12-16_20X_Control_Lung1.6_SOX9_HOPX_SFTPC_001-MaxIP	48	680.99	24.01
Control1	2019-12-16_20X_Control_Lung1.6_SOX9_HOPX_SFTPC_001-MaxIP	124	687.96	29.15
Control1	2019-12-16_20X_Control_Lung1.6_SOX9_HOPX_SFTPC_001-MaxIP	175	710.03	29.13
Control1	2019-12-16_20X_Control_Lung1.6_SOX9_HOPX_SFTPC_001-MaxIP	34	710.8	34.96
Control1	2019-12-16_20X_Control_Lung1.6_SOX9_HOPX_SFTPC_001-MaxIP	169	714.67	29.32
Control1	2019-12-16_20X_Control_Lung1.6_SOX9_HOPX_SFTPC_001-MaxIP	82	733.64	28.34
Control1	2019-12-16_20X_Control_Lung1.6_SOX9_HOPX_SFTPC_001-MaxIP	190	737.9	42.07
Control1	2019-12-16_20X_Control_Lung1.6_SOX9_HOPX_SFTPC_001-MaxIP	71	780.88	32.27
Control1	2019-12-16_20X_Control_Lung1.6_SOX9_HOPX_SFTPC_001-MaxIP	155	803.72	39.17
Control1	2019-12-16_20X_Control_Lung1.6_SOX9_HOPX_SFTPC_001-MaxIP	163	807.98	32.58
Control1	2019-12-16_20X_Control_Lung1.6_SOX9_HOPX_SFTPC_001-MaxIP	31	837.4	33.71
Control1	2019-12-16_20X_Control_Lung1.6_SOX9_HOPX_SFTPC_001-MaxIP	36	853.27	27.17
Control1	2019-12-16_20X_Control_Lung1.6_SOX9_HOPX_SFTPC_001-MaxIP	126	854.43	31.17
Control1	2019-12-16_20X_Control_Lung1.6_SOX9_HOPX_SFTPC_001-MaxIP	136	919.47	26.14
Control1	2019-12-16_20X_Control_Lung1.6_SOX9_HOPX_SFTPC_001-MaxIP	20	920.25	28.94
Control1	2019-12-16_20X_Control_Lung1.6_SOX9_HOPX_SFTPC_001-MaxIP	26	926.83	41.65
Control1	2019-12-16_20X_Control_Lung1.6_SOX9_HOPX_SFTPC_001-MaxIP	153	967.09	45.06
Control1	2019-12-16_20X_Control_Lung1.6_SOX9_HOPX_SFTPC_001-MaxIP	164	967.09	37.1
Control1	2019-12-16_20X_Control_Lung1.6_SOX9_HOPX_SFTPC_001-MaxIP	45	980.26	34.82
Control1	2019-12-16_20X_Control_Lung1.6_SOX9_HOPX_SFTPC_001-MaxIP	15	995.36	34.22
Control1	2019-12-16_20X_Control_Lung1.6_SOX9_HOPX_SFTPC_001-MaxIP	132	1030.97	31.05
Control1	2019-12-16_20X_Control_Lung1.6_SOX9_HOPX_SFTPC_001-MaxIP	102	1078.98	32.78
Control1	2019-12-16_20X_Control_Lung1.6_SOX9_HOPX_SFTPC_001-MaxIP	16	1102.98	33.23
Control1	2019-12-16_20X_Control_Lung1.6_SOX9_HOPX_SFTPC_001-MaxIP	157	1103.37	51.5
Control1	2019-12-16_20X_Control_Lung1.6_SOX9_HOPX_SFTPC_001-MaxIP	118	1130.86	40.9
Control1	2019-12-16_20X_Control_Lung1.6_SOX9_HOPX_SFTPC_001-MaxIP	11	1133.95	32.93
Control1	2019-12-16_20X_Control_Lung1.6_SOX9_HOPX_SFTPC_001-MaxIP	55	1135.5	36.74
Control1	2019-12-16_20X_Control_Lung1.6_SOX9_HOPX_SFTPC_001-MaxIP	61	1223.77	36.15
Control1	2019-12-16_20X_Control_Lung1.6_SOX9_HOPX_SFTPC_001-MaxIP	170	1243.9	34.04
Control1	2019-12-16_20X_Control_Lung1.6_SOX9_HOPX_SFTPC_001-MaxIP	174	1256.68	35.51
Control1	2019-12-16_20X_Control_Lung1.6_SOX9_HOPX_SFTPC_001-MaxIP	37	1263.65	38.51
Control1	2019-12-16_20X_Control_Lung1.6_SOX9_HOPX_SFTPC_001-MaxIP	172	1319.4	39.32
Control1	2019-12-16_20X_Control_Lung1.6_SOX9_HOPX_SFTPC_001-MaxIP	151	1369.73	38.02
Control1	2019-12-16_20X_Control_Lung1.6_SOX9_HOPX_SFTPC_001-MaxIP	44	1434.38	49.61
Control1	2019-12-16_20X_Control_Lung1.6_SOX9_HOPX_SFTPC_001-MaxIP	68	1729.77	58.33
Control1	2019-12-16_20X_Control_Lung1.6_SOX9_HOPX_SFTPC_001-MaxIP	75	1798.69	59.43
Control1	2019-12-16_20X_Control_Lung1.6_SOX9_HOPX_SFTPC_001-MaxIP	72	2130.86	54.79
Control1	2019-12-16_20X_Control_Lung1.6_SOX9_HOPX_SFTPC_001-MaxIP	179	2253.58	49.76
Control1	2019-12-16_20X_Control_Lung1.6_SOX9_HOPX_SFTPC_001-MaxIP	58	2266.75	80.29
Control1	2019-12-16_20X_Control_Lung1.6_SOX9_HOPX_SFTPC_002-MaxIP	135	50.33	9.27
Control1	2019-12-16_20X_Control_Lung1.6_SOX9_HOPX_SFTPC_002-MaxIP	92	50.72	5.75
Control1	2019-12-16_20X_Control_Lung1.6_SOX9_HOPX_SFTPC_002-MaxIP	13	51.88	8.86
Control1	2019-12-16_20X_Control_Lung1.6_SOX9_HOPX_SFTPC_002-MaxIP	203	53.04	7.01
Control1	2019-12-16_20X_Control_Lung1.6_SOX9_HOPX_SFTPC_002-MaxIP	204	53.43	7.8
Control1	2019-12-16_20X_Control_Lung1.6_SOX9_HOPX_SFTPC_002-MaxIP	181	55.36	6
Control1	2019-12-16_20X_Control_Lung1.6_SOX9_HOPX_SFTPC_002-MaxIP	17	59.23	8.55
Control1	2019-12-16_20X_Control_Lung1.6_SOX9_HOPX_SFTPC_002-MaxIP	202	65.43	6.63
Control1	2019-12-16_20X_Control_Lung1.6_SOX9_HOPX_SFTPC_002-MaxIP	1	67.36	9.39
Control1	2019-12-16_20X_Control_Lung1.6_SOX9_HOPX_SFTPC_002-MaxIP	178	67.75	10.24
Control1	2019-12-16_20X_Control_Lung1.6_SOX9_HOPX_SFTPC_002-MaxIP	12	68.53	7.36
Control1	2019-12-16_20X_Control_Lung1.6_SOX9_HOPX_SFTPC_002-MaxIP	44	68.91	8.23
Control1	2019-12-16_20X_Control_Lung1.6_SOX9_HOPX_SFTPC_002-MaxIP	196	69.3	5.93
Control1	2019-12-16_20X_Control_Lung1.6_SOX9_HOPX_SFTPC_002-MaxIP	170	70.07	7.29
Control1	2019-12-16_20X_Control_Lung1.6_SOX9_HOPX_SFTPC_002-MaxIP	75	70.85	8.52
Control1	2019-12-16_20X_Control_Lung1.6_SOX9_HOPX_SFTPC_002-MaxIP	145	70.85	9.23
Control1	2019-12-16_20X_Control_Lung1.6_SOX9_HOPX_SFTPC_002-MaxIP	158	71.62	10.36
Control1	2019-12-16_20X_Control_Lung1.6_SOX9_HOPX_SFTPC_002-MaxIP	201	72.78	5.93
Control1	2019-12-16_20X_Control_Lung1.6_SOX9_HOPX_SFTPC_002-MaxIP	22	73.17	10.65
Control1	2019-12-16_20X_Control_Lung1.6_SOX9_HOPX_SFTPC_002-MaxIP	140	73.95	8.18
Control1	2019-12-16_20X_Control_Lung1.6_SOX9_HOPX_SFTPC_002-MaxIP	39	74.72	8.1
Control1	2019-12-16_20X_Control_Lung1.6_SOX9_HOPX_SFTPC_002-MaxIP	85	75.49	10.53
Control1	2019-12-16_20X_Control_Lung1.6_SOX9_HOPX_SFTPC_002-MaxIP	167	79.37	10.52
Control1	2019-12-16_20X_Control_Lung1.6_SOX9_HOPX_SFTPC_002-MaxIP	144	79.75	10.79
Control1	2019-12-16_20X_Control_Lung1.6_SOX9_HOPX_SFTPC_002-MaxIP	188	82.85	8.41
Control1	2019-12-16_20X_Control_Lung1.6_SOX9_HOPX_SFTPC_002-MaxIP	11	83.24	12.58
Control1	2019-12-16_20X_Control_Lung1.6_SOX9_HOPX_SFTPC_002-MaxIP	55	83.24	7.55
Control1	2019-12-16_20X_Control_Lung1.6_SOX9_HOPX_SFTPC_002-MaxIP	90	83.62	10.1
Control1	2019-12-16_20X_Control_Lung1.6_SOX9_HOPX_SFTPC_002-MaxIP	106	83.62	10
Control1	2019-12-16_20X_Control_Lung1.6_SOX9_HOPX_SFTPC_002-MaxIP	137	83.62	10.22
Control1	2019-12-16_20X_Control_Lung1.6_SOX9_HOPX_SFTPC_002-MaxIP	128	84.01	13.07
Control1	2019-12-16_20X_Control_Lung1.6_SOX9_HOPX_SFTPC_002-MaxIP	136	87.88	11.23
Control1	2019-12-16_20X_Control_Lung1.6_SOX9_HOPX_SFTPC_002-MaxIP	93	88.27	8.65
Control1	2019-12-16_20X_Control_Lung1.6_SOX9_HOPX_SFTPC_002-MaxIP	120	88.27	7.61
Control1	2019-12-16_20X_Control_Lung1.6_SOX9_HOPX_SFTPC_002-MaxIP	198	89.43	11.34
Control1	2019-12-16_20X_Control_Lung1.6_SOX9_HOPX_SFTPC_002-MaxIP	50	92.14	13.77
Control1	2019-12-16_20X_Control_Lung1.6_SOX9_HOPX_SFTPC_002-MaxIP	116	96.4	7.53
Control1	2019-12-16_20X_Control_Lung1.6_SOX9_HOPX_SFTPC_002-MaxIP	74	98.34	9.75
Control1	2019-12-16_20X_Control_Lung1.6_SOX9_HOPX_SFTPC_002-MaxIP	23	99.5	10.28
Control1	2019-12-16_20X_Control_Lung1.6_SOX9_HOPX_SFTPC_002-MaxIP	40	99.88	10.8
Control1	2019-12-16_20X_Control_Lung1.6_SOX9_HOPX_SFTPC_002-MaxIP	179	99.88	10.21
Control1	2019-12-16_20X_Control_Lung1.6_SOX9_HOPX_SFTPC_002-MaxIP	143	102.98	10.77
Control1	2019-12-16_20X_Control_Lung1.6_SOX9_HOPX_SFTPC_002-MaxIP	139	103.76	11.2
Control1	2019-12-16_20X_Control_Lung1.6_SOX9_HOPX_SFTPC_002-MaxIP	94	105.3	8.8
Control1	2019-12-16_20X_Control_Lung1.6_SOX9_HOPX_SFTPC_002-MaxIP	95	112.27	10.97
Control1	2019-12-16_20X_Control_Lung1.6_SOX9_HOPX_SFTPC_002-MaxIP	176	112.66	9.49
Control1	2019-12-16_20X_Control_Lung1.6_SOX9_HOPX_SFTPC_002-MaxIP	38	114.6	11.66
Control1	2019-12-16_20X_Control_Lung1.6_SOX9_HOPX_SFTPC_002-MaxIP	151	115.37	13.8
Control1	2019-12-16_20X_Control_Lung1.6_SOX9_HOPX_SFTPC_002-MaxIP	56	120.4	13.01
Control1	2019-12-16_20X_Control_Lung1.6_SOX9_HOPX_SFTPC_002-MaxIP	89	122.34	13.97
Control1	2019-12-16_20X_Control_Lung1.6_SOX9_HOPX_SFTPC_002-MaxIP	189	122.34	8.62
Control1	2019-12-16_20X_Control_Lung1.6_SOX9_HOPX_SFTPC_002-MaxIP	131	123.5	12.46
Control1	2019-12-16_20X_Control_Lung1.6_SOX9_HOPX_SFTPC_002-MaxIP	172	125.05	8.31
Control1	2019-12-16_20X_Control_Lung1.6_SOX9_HOPX_SFTPC_002-MaxIP	107	128.15	13.14
Control1	2019-12-16_20X_Control_Lung1.6_SOX9_HOPX_SFTPC_002-MaxIP	103	130.86	14
Control1	2019-12-16_20X_Control_Lung1.6_SOX9_HOPX_SFTPC_002-MaxIP	28	132.79	16.36
Control1	2019-12-16_20X_Control_Lung1.6_SOX9_HOPX_SFTPC_002-MaxIP	146	145.57	14.44
Control1	2019-12-16_20X_Control_Lung1.6_SOX9_HOPX_SFTPC_002-MaxIP	192	147.89	12.64
Control1	2019-12-16_20X_Control_Lung1.6_SOX9_HOPX_SFTPC_002-MaxIP	157	148.28	13.75
Control1	2019-12-16_20X_Control_Lung1.6_SOX9_HOPX_SFTPC_002-MaxIP	119	148.66	15.9
Control1	2019-12-16_20X_Control_Lung1.6_SOX9_HOPX_SFTPC_002-MaxIP	173	156.02	15.24
Control1	2019-12-16_20X_Control_Lung1.6_SOX9_HOPX_SFTPC_002-MaxIP	115	160.28	15.51
Control1	2019-12-16_20X_Control_Lung1.6_SOX9_HOPX_SFTPC_002-MaxIP	111	166.47	15.49
Control1	2019-12-16_20X_Control_Lung1.6_SOX9_HOPX_SFTPC_002-MaxIP	91	166.86	11.84
Control1	2019-12-16_20X_Control_Lung1.6_SOX9_HOPX_SFTPC_002-MaxIP	24	167.25	15.22
Control1	2019-12-16_20X_Control_Lung1.6_SOX9_HOPX_SFTPC_002-MaxIP	77	168.8	17.26
Control1	2019-12-16_20X_Control_Lung1.6_SOX9_HOPX_SFTPC_002-MaxIP	138	169.18	14.3
Control1	2019-12-16_20X_Control_Lung1.6_SOX9_HOPX_SFTPC_002-MaxIP	124	170.34	14.03
Control1	2019-12-16_20X_Control_Lung1.6_SOX9_HOPX_SFTPC_002-MaxIP	163	170.34	15.99
Control1	2019-12-16_20X_Control_Lung1.6_SOX9_HOPX_SFTPC_002-MaxIP	164	171.89	14.79
Control1	2019-12-16_20X_Control_Lung1.6_SOX9_HOPX_SFTPC_002-MaxIP	59	175.76	12.52
Control1	2019-12-16_20X_Control_Lung1.6_SOX9_HOPX_SFTPC_002-MaxIP	142	188.15	15.3
Control1	2019-12-16_20X_Control_Lung1.6_SOX9_HOPX_SFTPC_002-MaxIP	45	203.64	10.7
Control1	2019-12-16_20X_Control_Lung1.6_SOX9_HOPX_SFTPC_002-MaxIP	2	204.03	15.96
Control1	2019-12-16_20X_Control_Lung1.6_SOX9_HOPX_SFTPC_002-MaxIP	80	207.51	13.16
Control1	2019-12-16_20X_Control_Lung1.6_SOX9_HOPX_SFTPC_002-MaxIP	96	210.61	16.11
Control1	2019-12-16_20X_Control_Lung1.6_SOX9_HOPX_SFTPC_002-MaxIP	67	221.84	18.28
Control1	2019-12-16_20X_Control_Lung1.6_SOX9_HOPX_SFTPC_002-MaxIP	6	223.77	17.55
Control1	2019-12-16_20X_Control_Lung1.6_SOX9_HOPX_SFTPC_002-MaxIP	132	224.55	17.18
Control1	2019-12-16_20X_Control_Lung1.6_SOX9_HOPX_SFTPC_002-MaxIP	147	228.42	20.79
Control1	2019-12-16_20X_Control_Lung1.6_SOX9_HOPX_SFTPC_002-MaxIP	195	232.68	18.45
Control1	2019-12-16_20X_Control_Lung1.6_SOX9_HOPX_SFTPC_002-MaxIP	78	242.35	24.11
Control1	2019-12-16_20X_Control_Lung1.6_SOX9_HOPX_SFTPC_002-MaxIP	65	250.1	20.15
Control1	2019-12-16_20X_Control_Lung1.6_SOX9_HOPX_SFTPC_002-MaxIP	15	253.19	19.83
Control1	2019-12-16_20X_Control_Lung1.6_SOX9_HOPX_SFTPC_002-MaxIP	148	254.36	15.12
Control1	2019-12-16_20X_Control_Lung1.6_SOX9_HOPX_SFTPC_002-MaxIP	62	262.1	18.87
Control1	2019-12-16_20X_Control_Lung1.6_SOX9_HOPX_SFTPC_002-MaxIP	133	267.91	17.88
Control1	2019-12-16_20X_Control_Lung1.6_SOX9_HOPX_SFTPC_002-MaxIP	102	271.78	16.54
Control1	2019-12-16_20X_Control_Lung1.6_SOX9_HOPX_SFTPC_002-MaxIP	199	272.16	16.33
Control1	2019-12-16_20X_Control_Lung1.6_SOX9_HOPX_SFTPC_002-MaxIP	64	276.04	17.84
Control1	2019-12-16_20X_Control_Lung1.6_SOX9_HOPX_SFTPC_002-MaxIP	160	278.75	17.36
Control1	2019-12-16_20X_Control_Lung1.6_SOX9_HOPX_SFTPC_002-MaxIP	149	279.91	20.36
Control1	2019-12-16_20X_Control_Lung1.6_SOX9_HOPX_SFTPC_002-MaxIP	121	286.1	18.61
Control1	2019-12-16_20X_Control_Lung1.6_SOX9_HOPX_SFTPC_002-MaxIP	31	292.3	19.12
Control1	2019-12-16_20X_Control_Lung1.6_SOX9_HOPX_SFTPC_002-MaxIP	175	299.26	15.44
Control1	2019-12-16_20X_Control_Lung1.6_SOX9_HOPX_SFTPC_002-MaxIP	63	300.43	19.42
Control1	2019-12-16_20X_Control_Lung1.6_SOX9_HOPX_SFTPC_002-MaxIP	26	301.97	19.36
Control1	2019-12-16_20X_Control_Lung1.6_SOX9_HOPX_SFTPC_002-MaxIP	161	314.36	17.31
Control1	2019-12-16_20X_Control_Lung1.6_SOX9_HOPX_SFTPC_002-MaxIP	3	323.66	22.44
Control1	2019-12-16_20X_Control_Lung1.6_SOX9_HOPX_SFTPC_002-MaxIP	9	347.66	23.35
Control1	2019-12-16_20X_Control_Lung1.6_SOX9_HOPX_SFTPC_002-MaxIP	125	354.24	18.42
Control1	2019-12-16_20X_Control_Lung1.6_SOX9_HOPX_SFTPC_002-MaxIP	187	355.4	17.27
Control1	2019-12-16_20X_Control_Lung1.6_SOX9_HOPX_SFTPC_002-MaxIP	57	363.53	21.72
Control1	2019-12-16_20X_Control_Lung1.6_SOX9_HOPX_SFTPC_002-MaxIP	8	363.92	24.91
Control1	2019-12-16_20X_Control_Lung1.6_SOX9_HOPX_SFTPC_002-MaxIP	97	367.4	25.49
Control1	2019-12-16_20X_Control_Lung1.6_SOX9_HOPX_SFTPC_002-MaxIP	72	372.44	24.45
Control1	2019-12-16_20X_Control_Lung1.6_SOX9_HOPX_SFTPC_002-MaxIP	68	380.57	16.29
Control1	2019-12-16_20X_Control_Lung1.6_SOX9_HOPX_SFTPC_002-MaxIP	200	393.34	26
Control1	2019-12-16_20X_Control_Lung1.6_SOX9_HOPX_SFTPC_002-MaxIP	191	404.57	20.66
Control1	2019-12-16_20X_Control_Lung1.6_SOX9_HOPX_SFTPC_002-MaxIP	79	413.47	19.99
Control1	2019-12-16_20X_Control_Lung1.6_SOX9_HOPX_SFTPC_002-MaxIP	52	415.41	23.36
Control1	2019-12-16_20X_Control_Lung1.6_SOX9_HOPX_SFTPC_002-MaxIP	152	429.73	21.01
Control1	2019-12-16_20X_Control_Lung1.6_SOX9_HOPX_SFTPC_002-MaxIP	33	433.99	30.54
Control1	2019-12-16_20X_Control_Lung1.6_SOX9_HOPX_SFTPC_002-MaxIP	48	434.77	24.96
Control1	2019-12-16_20X_Control_Lung1.6_SOX9_HOPX_SFTPC_002-MaxIP	35	439.02	22.23
Control1	2019-12-16_20X_Control_Lung1.6_SOX9_HOPX_SFTPC_002-MaxIP	117	440.57	24.88
Control1	2019-12-16_20X_Control_Lung1.6_SOX9_HOPX_SFTPC_002-MaxIP	193	449.09	24
Control1	2019-12-16_20X_Control_Lung1.6_SOX9_HOPX_SFTPC_002-MaxIP	162	462.25	27.28
Control1	2019-12-16_20X_Control_Lung1.6_SOX9_HOPX_SFTPC_002-MaxIP	101	463.8	21.66
Control1	2019-12-16_20X_Control_Lung1.6_SOX9_HOPX_SFTPC_002-MaxIP	71	464.58	26.32
Control1	2019-12-16_20X_Control_Lung1.6_SOX9_HOPX_SFTPC_002-MaxIP	61	465.74	24.39
Control1	2019-12-16_20X_Control_Lung1.6_SOX9_HOPX_SFTPC_002-MaxIP	69	471.55	25.02
Control1	2019-12-16_20X_Control_Lung1.6_SOX9_HOPX_SFTPC_002-MaxIP	29	473.09	23.64
Control1	2019-12-16_20X_Control_Lung1.6_SOX9_HOPX_SFTPC_002-MaxIP	186	475.42	23.58
Control1	2019-12-16_20X_Control_Lung1.6_SOX9_HOPX_SFTPC_002-MaxIP	66	493.23	22.65
Control1	2019-12-16_20X_Control_Lung1.6_SOX9_HOPX_SFTPC_002-MaxIP	122	502.52	24.27
Control1	2019-12-16_20X_Control_Lung1.6_SOX9_HOPX_SFTPC_002-MaxIP	154	502.9	25.61
Control1	2019-12-16_20X_Control_Lung1.6_SOX9_HOPX_SFTPC_002-MaxIP	185	503.68	26.67
Control1	2019-12-16_20X_Control_Lung1.6_SOX9_HOPX_SFTPC_002-MaxIP	51	506.39	23.35
Control1	2019-12-16_20X_Control_Lung1.6_SOX9_HOPX_SFTPC_002-MaxIP	76	513.74	25.04
Control1	2019-12-16_20X_Control_Lung1.6_SOX9_HOPX_SFTPC_002-MaxIP	127	517.23	26.05
Control1	2019-12-16_20X_Control_Lung1.6_SOX9_HOPX_SFTPC_002-MaxIP	197	526.13	25.55
Control1	2019-12-16_20X_Control_Lung1.6_SOX9_HOPX_SFTPC_002-MaxIP	83	531.94	22.9
Control1	2019-12-16_20X_Control_Lung1.6_SOX9_HOPX_SFTPC_002-MaxIP	21	548.2	23.16
Control1	2019-12-16_20X_Control_Lung1.6_SOX9_HOPX_SFTPC_002-MaxIP	43	554.01	32.28
Control1	2019-12-16_20X_Control_Lung1.6_SOX9_HOPX_SFTPC_002-MaxIP	156	554.39	28.69
Control1	2019-12-16_20X_Control_Lung1.6_SOX9_HOPX_SFTPC_002-MaxIP	41	578.01	23.78
Control1	2019-12-16_20X_Control_Lung1.6_SOX9_HOPX_SFTPC_002-MaxIP	87	581.88	27.68
Control1	2019-12-16_20X_Control_Lung1.6_SOX9_HOPX_SFTPC_002-MaxIP	153	601.63	31.78
Control1	2019-12-16_20X_Control_Lung1.6_SOX9_HOPX_SFTPC_002-MaxIP	168	601.63	31.66
Control1	2019-12-16_20X_Control_Lung1.6_SOX9_HOPX_SFTPC_002-MaxIP	46	602.01	30.78
Control1	2019-12-16_20X_Control_Lung1.6_SOX9_HOPX_SFTPC_002-MaxIP	114	612.08	32.41
Control1	2019-12-16_20X_Control_Lung1.6_SOX9_HOPX_SFTPC_002-MaxIP	190	614.79	21.32
Control1	2019-12-16_20X_Control_Lung1.6_SOX9_HOPX_SFTPC_002-MaxIP	34	624.08	30.24
Control1	2019-12-16_20X_Control_Lung1.6_SOX9_HOPX_SFTPC_002-MaxIP	110	624.47	32.39
Control1	2019-12-16_20X_Control_Lung1.6_SOX9_HOPX_SFTPC_002-MaxIP	14	626.02	30.88
Control1	2019-12-16_20X_Control_Lung1.6_SOX9_HOPX_SFTPC_002-MaxIP	25	626.02	30.8
Control1	2019-12-16_20X_Control_Lung1.6_SOX9_HOPX_SFTPC_002-MaxIP	113	629.89	28.78
Control1	2019-12-16_20X_Control_Lung1.6_SOX9_HOPX_SFTPC_002-MaxIP	171	638.02	29.79
Control1	2019-12-16_20X_Control_Lung1.6_SOX9_HOPX_SFTPC_002-MaxIP	73	642.28	32.09
Control1	2019-12-16_20X_Control_Lung1.6_SOX9_HOPX_SFTPC_002-MaxIP	20	643.05	30.14
Control1	2019-12-16_20X_Control_Lung1.6_SOX9_HOPX_SFTPC_002-MaxIP	130	655.44	29.58
Control1	2019-12-16_20X_Control_Lung1.6_SOX9_HOPX_SFTPC_002-MaxIP	5	656.21	25.45
Control1	2019-12-16_20X_Control_Lung1.6_SOX9_HOPX_SFTPC_002-MaxIP	10	674.41	30.22
Control1	2019-12-16_20X_Control_Lung1.6_SOX9_HOPX_SFTPC_002-MaxIP	86	676.35	31
Control1	2019-12-16_20X_Control_Lung1.6_SOX9_HOPX_SFTPC_002-MaxIP	32	676.73	27.67
Control1	2019-12-16_20X_Control_Lung1.6_SOX9_HOPX_SFTPC_002-MaxIP	99	696.48	23.93
Control1	2019-12-16_20X_Control_Lung1.6_SOX9_HOPX_SFTPC_002-MaxIP	194	696.87	26.65
Control1	2019-12-16_20X_Control_Lung1.6_SOX9_HOPX_SFTPC_002-MaxIP	98	704.61	27.68
Control1	2019-12-16_20X_Control_Lung1.6_SOX9_HOPX_SFTPC_002-MaxIP	180	714.29	25.12
Control1	2019-12-16_20X_Control_Lung1.6_SOX9_HOPX_SFTPC_002-MaxIP	82	720.87	33.7
Control1	2019-12-16_20X_Control_Lung1.6_SOX9_HOPX_SFTPC_002-MaxIP	108	724.74	33.8
Control1	2019-12-16_20X_Control_Lung1.6_SOX9_HOPX_SFTPC_002-MaxIP	109	727.84	35.1
Control1	2019-12-16_20X_Control_Lung1.6_SOX9_HOPX_SFTPC_002-MaxIP	126	727.84	25.08
Control1	2019-12-16_20X_Control_Lung1.6_SOX9_HOPX_SFTPC_002-MaxIP	54	738.29	33.83
Control1	2019-12-16_20X_Control_Lung1.6_SOX9_HOPX_SFTPC_002-MaxIP	36	738.68	26.97
Control1	2019-12-16_20X_Control_Lung1.6_SOX9_HOPX_SFTPC_002-MaxIP	141	754.16	35.17
Control1	2019-12-16_20X_Control_Lung1.6_SOX9_HOPX_SFTPC_002-MaxIP	60	762.68	31.95
Control1	2019-12-16_20X_Control_Lung1.6_SOX9_HOPX_SFTPC_002-MaxIP	27	786.3	35
Control1	2019-12-16_20X_Control_Lung1.6_SOX9_HOPX_SFTPC_002-MaxIP	18	813.4	34.38
Control1	2019-12-16_20X_Control_Lung1.6_SOX9_HOPX_SFTPC_002-MaxIP	169	819.59	30.93
Control1	2019-12-16_20X_Control_Lung1.6_SOX9_HOPX_SFTPC_002-MaxIP	184	825.4	36.18
Control1	2019-12-16_20X_Control_Lung1.6_SOX9_HOPX_SFTPC_002-MaxIP	105	833.53	30.37
Control1	2019-12-16_20X_Control_Lung1.6_SOX9_HOPX_SFTPC_002-MaxIP	129	838.17	33.79
Control1	2019-12-16_20X_Control_Lung1.6_SOX9_HOPX_SFTPC_002-MaxIP	7	845.92	36.22
Control1	2019-12-16_20X_Control_Lung1.6_SOX9_HOPX_SFTPC_002-MaxIP	4	846.3	29.75
Control1	2019-12-16_20X_Control_Lung1.6_SOX9_HOPX_SFTPC_002-MaxIP	53	853.66	39.12
Control1	2019-12-16_20X_Control_Lung1.6_SOX9_HOPX_SFTPC_002-MaxIP	182	879.6	31.18
Control1	2019-12-16_20X_Control_Lung1.6_SOX9_HOPX_SFTPC_002-MaxIP	30	884.63	29.68
Control1	2019-12-16_20X_Control_Lung1.6_SOX9_HOPX_SFTPC_002-MaxIP	37	920.25	31.5
Control1	2019-12-16_20X_Control_Lung1.6_SOX9_HOPX_SFTPC_002-MaxIP	88	920.25	36.06
Control1	2019-12-16_20X_Control_Lung1.6_SOX9_HOPX_SFTPC_002-MaxIP	165	955.87	34.69
Control1	2019-12-16_20X_Control_Lung1.6_SOX9_HOPX_SFTPC_002-MaxIP	42	1002.32	33.77
Control1	2019-12-16_20X_Control_Lung1.6_SOX9_HOPX_SFTPC_002-MaxIP	49	1008.52	35.35
Control1	2019-12-16_20X_Control_Lung1.6_SOX9_HOPX_SFTPC_002-MaxIP	58	1019.75	39.5
Control1	2019-12-16_20X_Control_Lung1.6_SOX9_HOPX_SFTPC_002-MaxIP	177	1104.14	39.08
Control1	2019-12-16_20X_Control_Lung1.6_SOX9_HOPX_SFTPC_002-MaxIP	123	1118.47	47.63
Control1	2019-12-16_20X_Control_Lung1.6_SOX9_HOPX_SFTPC_002-MaxIP	155	1128.15	40.17
Control1	2019-12-16_20X_Control_Lung1.6_SOX9_HOPX_SFTPC_002-MaxIP	112	1217.58	39.06
Control1	2019-12-16_20X_Control_Lung1.6_SOX9_HOPX_SFTPC_002-MaxIP	118	1475.81	53.62
Control1	2019-12-16_20X_Control_Lung1.6_SOX9_HOPX_SFTPC_002-MaxIP	104	1500.97	57.14
Control1	2019-12-16_20X_Control_Lung1.6_SOX9_HOPX_SFTPC_002-MaxIP	16	1632.6	46.38
Control1	2019-12-16_20X_Control_Lung1.6_SOX9_HOPX_SFTPC_002-MaxIP	183	1707.32	43.66
Control1	2019-12-16_20X_Control_Lung1.6_SOX9_HOPX_SFTPC_002-MaxIP	81	1866.44	60.43
Control1	2019-12-16_20X_Control_Lung1.6_SOX9_HOPX_SFTPC_002-MaxIP	159	1943.09	49.84
Control1	2019-12-16_20X_Control_Lung1.6_SOX9_HOPX_SFTPC_002-MaxIP	47	1965.16	40.48
Control1	2019-12-16_20X_Control_Lung1.6_SOX9_HOPX_SFTPC_002-MaxIP	134	2119.63	57.24
Control1	2019-12-16_20X_Control_Lung1.6_SOX9_HOPX_SFTPC_002-MaxIP	174	2198.22	69.12
Control1	2019-12-16_20X_Control_Lung1.6_SOX9_HOPX_SFTPC_002-MaxIP	150	2282.23	76.16
Control1	2019-12-16_20X_Control_Lung1.6_SOX9_HOPX_SFTPC_002-MaxIP	19	2341.47	56.53
Control1	2019-12-16_20X_Control_Lung1.6_SOX9_HOPX_SFTPC_002-MaxIP	166	2426.64	83.2
Control1	2019-12-16_20X_Control_Lung1.6_SOX9_HOPX_SFTPC_002-MaxIP	70	2694.93	87.7
Control1	2019-12-16_20X_Control_Lung1.6_SOX9_HOPX_SFTPC_002-MaxIP	100	2770.04	67.17
Control1	2019-12-16_20X_Control_Lung1.6_SOX9_HOPX_SFTPC_002-MaxIP	84	3009.68	56.28
Control1	2019-12-16_20X_Control_Lung1.6_SOX9_HOPX_SFTPC_003-MaxIP	27	50.72	5.38
Control1	2019-12-16_20X_Control_Lung1.6_SOX9_HOPX_SFTPC_003-MaxIP	197	50.72	7.38
Control1	2019-12-16_20X_Control_Lung1.6_SOX9_HOPX_SFTPC_003-MaxIP	188	51.1	9.13
Control1	2019-12-16_20X_Control_Lung1.6_SOX9_HOPX_SFTPC_003-MaxIP	83	53.04	5.35
Control1	2019-12-16_20X_Control_Lung1.6_SOX9_HOPX_SFTPC_003-MaxIP	149	54.2	8.03
Control1	2019-12-16_20X_Control_Lung1.6_SOX9_HOPX_SFTPC_003-MaxIP	22	55.36	6.54
Control1	2019-12-16_20X_Control_Lung1.6_SOX9_HOPX_SFTPC_003-MaxIP	160	55.36	6.26
Control1	2019-12-16_20X_Control_Lung1.6_SOX9_HOPX_SFTPC_003-MaxIP	182	55.36	6.83
Control1	2019-12-16_20X_Control_Lung1.6_SOX9_HOPX_SFTPC_003-MaxIP	4	56.52	8.92
Control1	2019-12-16_20X_Control_Lung1.6_SOX9_HOPX_SFTPC_003-MaxIP	60	58.85	10.53
Control1	2019-12-16_20X_Control_Lung1.6_SOX9_HOPX_SFTPC_003-MaxIP	172	59.62	6.42
Control1	2019-12-16_20X_Control_Lung1.6_SOX9_HOPX_SFTPC_003-MaxIP	170	60.39	11.44
Control1	2019-12-16_20X_Control_Lung1.6_SOX9_HOPX_SFTPC_003-MaxIP	14	61.94	8.06
Control1	2019-12-16_20X_Control_Lung1.6_SOX9_HOPX_SFTPC_003-MaxIP	156	61.94	8.64
Control1	2019-12-16_20X_Control_Lung1.6_SOX9_HOPX_SFTPC_003-MaxIP	74	63.49	7.67
Control1	2019-12-16_20X_Control_Lung1.6_SOX9_HOPX_SFTPC_003-MaxIP	23	66.59	8.39
Control1	2019-12-16_20X_Control_Lung1.6_SOX9_HOPX_SFTPC_003-MaxIP	180	69.3	8.06
Control1	2019-12-16_20X_Control_Lung1.6_SOX9_HOPX_SFTPC_003-MaxIP	195	69.69	11.57
Control1	2019-12-16_20X_Control_Lung1.6_SOX9_HOPX_SFTPC_003-MaxIP	147	70.46	9.55
Control1	2019-12-16_20X_Control_Lung1.6_SOX9_HOPX_SFTPC_003-MaxIP	175	72.4	9.13
Control1	2019-12-16_20X_Control_Lung1.6_SOX9_HOPX_SFTPC_003-MaxIP	85	75.88	10.26
Control1	2019-12-16_20X_Control_Lung1.6_SOX9_HOPX_SFTPC_003-MaxIP	162	76.27	11.38
Control1	2019-12-16_20X_Control_Lung1.6_SOX9_HOPX_SFTPC_003-MaxIP	89	76.66	9.39
Control1	2019-12-16_20X_Control_Lung1.6_SOX9_HOPX_SFTPC_003-MaxIP	42	79.37	11
Control1	2019-12-16_20X_Control_Lung1.6_SOX9_HOPX_SFTPC_003-MaxIP	137	79.37	8.52
Control1	2019-12-16_20X_Control_Lung1.6_SOX9_HOPX_SFTPC_003-MaxIP	186	79.75	13.38
Control1	2019-12-16_20X_Control_Lung1.6_SOX9_HOPX_SFTPC_003-MaxIP	130	82.46	12.51
Control1	2019-12-16_20X_Control_Lung1.6_SOX9_HOPX_SFTPC_003-MaxIP	98	87.88	7.92
Control1	2019-12-16_20X_Control_Lung1.6_SOX9_HOPX_SFTPC_003-MaxIP	29	89.43	11.4
Control1	2019-12-16_20X_Control_Lung1.6_SOX9_HOPX_SFTPC_003-MaxIP	126	90.21	8.54
Control1	2019-12-16_20X_Control_Lung1.6_SOX9_HOPX_SFTPC_003-MaxIP	136	90.21	10.35
Control1	2019-12-16_20X_Control_Lung1.6_SOX9_HOPX_SFTPC_003-MaxIP	34	94.46	10.01
Control1	2019-12-16_20X_Control_Lung1.6_SOX9_HOPX_SFTPC_003-MaxIP	114	96.4	10.52
Control1	2019-12-16_20X_Control_Lung1.6_SOX9_HOPX_SFTPC_003-MaxIP	16	103.37	9.83
Control1	2019-12-16_20X_Control_Lung1.6_SOX9_HOPX_SFTPC_003-MaxIP	153	103.76	11.44
Control1	2019-12-16_20X_Control_Lung1.6_SOX9_HOPX_SFTPC_003-MaxIP	181	106.85	10.49
Control1	2019-12-16_20X_Control_Lung1.6_SOX9_HOPX_SFTPC_003-MaxIP	68	111.5	11.34
Control1	2019-12-16_20X_Control_Lung1.6_SOX9_HOPX_SFTPC_003-MaxIP	35	113.05	10.19
Control1	2019-12-16_20X_Control_Lung1.6_SOX9_HOPX_SFTPC_003-MaxIP	127	116.53	13.11
Control1	2019-12-16_20X_Control_Lung1.6_SOX9_HOPX_SFTPC_003-MaxIP	73	121.56	17.83
Control1	2019-12-16_20X_Control_Lung1.6_SOX9_HOPX_SFTPC_003-MaxIP	88	125.44	13.4
Control1	2019-12-16_20X_Control_Lung1.6_SOX9_HOPX_SFTPC_003-MaxIP	202	125.82	13.92
Control1	2019-12-16_20X_Control_Lung1.6_SOX9_HOPX_SFTPC_003-MaxIP	84	126.98	10.38
Control1	2019-12-16_20X_Control_Lung1.6_SOX9_HOPX_SFTPC_003-MaxIP	109	127.37	12.86
Control1	2019-12-16_20X_Control_Lung1.6_SOX9_HOPX_SFTPC_003-MaxIP	120	131.24	12.42
Control1	2019-12-16_20X_Control_Lung1.6_SOX9_HOPX_SFTPC_003-MaxIP	157	132.02	12.36
Control1	2019-12-16_20X_Control_Lung1.6_SOX9_HOPX_SFTPC_003-MaxIP	199	137.44	11.16
Control1	2019-12-16_20X_Control_Lung1.6_SOX9_HOPX_SFTPC_003-MaxIP	65	140.53	13.26
Control1	2019-12-16_20X_Control_Lung1.6_SOX9_HOPX_SFTPC_003-MaxIP	103	141.7	15.13
Control1	2019-12-16_20X_Control_Lung1.6_SOX9_HOPX_SFTPC_003-MaxIP	15	145.18	13.18
Control1	2019-12-16_20X_Control_Lung1.6_SOX9_HOPX_SFTPC_003-MaxIP	7	145.95	14.58
Control1	2019-12-16_20X_Control_Lung1.6_SOX9_HOPX_SFTPC_003-MaxIP	82	146.34	10.88
Control1	2019-12-16_20X_Control_Lung1.6_SOX9_HOPX_SFTPC_003-MaxIP	62	155.25	15.27
Control1	2019-12-16_20X_Control_Lung1.6_SOX9_HOPX_SFTPC_003-MaxIP	21	157.96	17.58
Control1	2019-12-16_20X_Control_Lung1.6_SOX9_HOPX_SFTPC_003-MaxIP	122	162.21	16.5
Control1	2019-12-16_20X_Control_Lung1.6_SOX9_HOPX_SFTPC_003-MaxIP	154	162.99	16.61
Control1	2019-12-16_20X_Control_Lung1.6_SOX9_HOPX_SFTPC_003-MaxIP	46	163.38	13.34
Control1	2019-12-16_20X_Control_Lung1.6_SOX9_HOPX_SFTPC_003-MaxIP	28	166.09	16.74
Control1	2019-12-16_20X_Control_Lung1.6_SOX9_HOPX_SFTPC_003-MaxIP	64	171.12	14.41
Control1	2019-12-16_20X_Control_Lung1.6_SOX9_HOPX_SFTPC_003-MaxIP	66	175.76	14.65
Control1	2019-12-16_20X_Control_Lung1.6_SOX9_HOPX_SFTPC_003-MaxIP	91	177.31	15.6
Control1	2019-12-16_20X_Control_Lung1.6_SOX9_HOPX_SFTPC_003-MaxIP	150	178.86	17.05
Control1	2019-12-16_20X_Control_Lung1.6_SOX9_HOPX_SFTPC_003-MaxIP	187	182.73	15.51
Control1	2019-12-16_20X_Control_Lung1.6_SOX9_HOPX_SFTPC_003-MaxIP	81	184.67	17.9
Control1	2019-12-16_20X_Control_Lung1.6_SOX9_HOPX_SFTPC_003-MaxIP	185	192.8	13.93
Control1	2019-12-16_20X_Control_Lung1.6_SOX9_HOPX_SFTPC_003-MaxIP	48	193.57	15.27
Control1	2019-12-16_20X_Control_Lung1.6_SOX9_HOPX_SFTPC_003-MaxIP	95	194.35	13.74
Control1	2019-12-16_20X_Control_Lung1.6_SOX9_HOPX_SFTPC_003-MaxIP	191	204.03	15.4
Control1	2019-12-16_20X_Control_Lung1.6_SOX9_HOPX_SFTPC_003-MaxIP	75	206.35	15.5
Control1	2019-12-16_20X_Control_Lung1.6_SOX9_HOPX_SFTPC_003-MaxIP	69	211.38	15.13
Control1	2019-12-16_20X_Control_Lung1.6_SOX9_HOPX_SFTPC_003-MaxIP	144	215.25	19.18
Control1	2019-12-16_20X_Control_Lung1.6_SOX9_HOPX_SFTPC_003-MaxIP	174	219.9	13.74
Control1	2019-12-16_20X_Control_Lung1.6_SOX9_HOPX_SFTPC_003-MaxIP	102	220.29	17.46
Control1	2019-12-16_20X_Control_Lung1.6_SOX9_HOPX_SFTPC_003-MaxIP	177	223.77	15.14
Control1	2019-12-16_20X_Control_Lung1.6_SOX9_HOPX_SFTPC_003-MaxIP	168	232.29	15.22
Control1	2019-12-16_20X_Control_Lung1.6_SOX9_HOPX_SFTPC_003-MaxIP	106	233.06	16.23
Control1	2019-12-16_20X_Control_Lung1.6_SOX9_HOPX_SFTPC_003-MaxIP	71	240.03	20.63
Control1	2019-12-16_20X_Control_Lung1.6_SOX9_HOPX_SFTPC_003-MaxIP	164	243.9	17.16
Control1	2019-12-16_20X_Control_Lung1.6_SOX9_HOPX_SFTPC_003-MaxIP	138	244.29	20.28
Control1	2019-12-16_20X_Control_Lung1.6_SOX9_HOPX_SFTPC_003-MaxIP	112	249.32	18.91
Control1	2019-12-16_20X_Control_Lung1.6_SOX9_HOPX_SFTPC_003-MaxIP	123	250.1	14.16
Control1	2019-12-16_20X_Control_Lung1.6_SOX9_HOPX_SFTPC_003-MaxIP	94	254.36	22.08
Control1	2019-12-16_20X_Control_Lung1.6_SOX9_HOPX_SFTPC_003-MaxIP	179	257.84	16.87
Control1	2019-12-16_20X_Control_Lung1.6_SOX9_HOPX_SFTPC_003-MaxIP	117	258.23	17.55
Control1	2019-12-16_20X_Control_Lung1.6_SOX9_HOPX_SFTPC_003-MaxIP	44	260.94	15.32
Control1	2019-12-16_20X_Control_Lung1.6_SOX9_HOPX_SFTPC_003-MaxIP	5	262.87	20.6
Control1	2019-12-16_20X_Control_Lung1.6_SOX9_HOPX_SFTPC_003-MaxIP	93	266.36	21.39
Control1	2019-12-16_20X_Control_Lung1.6_SOX9_HOPX_SFTPC_003-MaxIP	146	269.45	17.77
Control1	2019-12-16_20X_Control_Lung1.6_SOX9_HOPX_SFTPC_003-MaxIP	54	273.33	19.63
Control1	2019-12-16_20X_Control_Lung1.6_SOX9_HOPX_SFTPC_003-MaxIP	192	274.87	21.74
Control1	2019-12-16_20X_Control_Lung1.6_SOX9_HOPX_SFTPC_003-MaxIP	47	281.46	22.75
Control1	2019-12-16_20X_Control_Lung1.6_SOX9_HOPX_SFTPC_003-MaxIP	178	286.1	23.63
Control1	2019-12-16_20X_Control_Lung1.6_SOX9_HOPX_SFTPC_003-MaxIP	53	289.2	21.91
Control1	2019-12-16_20X_Control_Lung1.6_SOX9_HOPX_SFTPC_003-MaxIP	125	291.13	20.29
Control1	2019-12-16_20X_Control_Lung1.6_SOX9_HOPX_SFTPC_003-MaxIP	17	293.46	17.38
Control1	2019-12-16_20X_Control_Lung1.6_SOX9_HOPX_SFTPC_003-MaxIP	56	300.04	23.31
Control1	2019-12-16_20X_Control_Lung1.6_SOX9_HOPX_SFTPC_003-MaxIP	33	304.68	18.8
Control1	2019-12-16_20X_Control_Lung1.6_SOX9_HOPX_SFTPC_003-MaxIP	25	305.46	20.37
Control1	2019-12-16_20X_Control_Lung1.6_SOX9_HOPX_SFTPC_003-MaxIP	131	308.56	21.21
Control1	2019-12-16_20X_Control_Lung1.6_SOX9_HOPX_SFTPC_003-MaxIP	104	309.72	19.35
Control1	2019-12-16_20X_Control_Lung1.6_SOX9_HOPX_SFTPC_003-MaxIP	189	312.04	23.96
Control1	2019-12-16_20X_Control_Lung1.6_SOX9_HOPX_SFTPC_003-MaxIP	193	312.04	20.62
Control1	2019-12-16_20X_Control_Lung1.6_SOX9_HOPX_SFTPC_003-MaxIP	57	315.53	15.74
Control1	2019-12-16_20X_Control_Lung1.6_SOX9_HOPX_SFTPC_003-MaxIP	1	316.3	17.36
Control1	2019-12-16_20X_Control_Lung1.6_SOX9_HOPX_SFTPC_003-MaxIP	78	322.11	21.15
Control1	2019-12-16_20X_Control_Lung1.6_SOX9_HOPX_SFTPC_003-MaxIP	3	334.11	21.01
Control1	2019-12-16_20X_Control_Lung1.6_SOX9_HOPX_SFTPC_003-MaxIP	140	347.27	24.09
Control1	2019-12-16_20X_Control_Lung1.6_SOX9_HOPX_SFTPC_003-MaxIP	76	357.34	23.36
Control1	2019-12-16_20X_Control_Lung1.6_SOX9_HOPX_SFTPC_003-MaxIP	11	360.82	20.5
Control1	2019-12-16_20X_Control_Lung1.6_SOX9_HOPX_SFTPC_003-MaxIP	58	363.92	22.81
Control1	2019-12-16_20X_Control_Lung1.6_SOX9_HOPX_SFTPC_003-MaxIP	107	367.02	21.28
Control1	2019-12-16_20X_Control_Lung1.6_SOX9_HOPX_SFTPC_003-MaxIP	194	367.79	24.56
Control1	2019-12-16_20X_Control_Lung1.6_SOX9_HOPX_SFTPC_003-MaxIP	198	367.79	21.6
Control1	2019-12-16_20X_Control_Lung1.6_SOX9_HOPX_SFTPC_003-MaxIP	92	368.56	24.53
Control1	2019-12-16_20X_Control_Lung1.6_SOX9_HOPX_SFTPC_003-MaxIP	142	370.11	25.38
Control1	2019-12-16_20X_Control_Lung1.6_SOX9_HOPX_SFTPC_003-MaxIP	6	382.5	24.87
Control1	2019-12-16_20X_Control_Lung1.6_SOX9_HOPX_SFTPC_003-MaxIP	145	385.21	20.04
Control1	2019-12-16_20X_Control_Lung1.6_SOX9_HOPX_SFTPC_003-MaxIP	183	387.53	20.77
Control1	2019-12-16_20X_Control_Lung1.6_SOX9_HOPX_SFTPC_003-MaxIP	97	394.12	26.57
Control1	2019-12-16_20X_Control_Lung1.6_SOX9_HOPX_SFTPC_003-MaxIP	100	397.6	19.54
Control1	2019-12-16_20X_Control_Lung1.6_SOX9_HOPX_SFTPC_003-MaxIP	116	397.6	25.1
Control1	2019-12-16_20X_Control_Lung1.6_SOX9_HOPX_SFTPC_003-MaxIP	118	399.54	23.36
Control1	2019-12-16_20X_Control_Lung1.6_SOX9_HOPX_SFTPC_003-MaxIP	124	399.92	25.41
Control1	2019-12-16_20X_Control_Lung1.6_SOX9_HOPX_SFTPC_003-MaxIP	190	413.09	20.29
Control1	2019-12-16_20X_Control_Lung1.6_SOX9_HOPX_SFTPC_003-MaxIP	61	414.25	28.51
Control1	2019-12-16_20X_Control_Lung1.6_SOX9_HOPX_SFTPC_003-MaxIP	110	421.6	22.6
Control1	2019-12-16_20X_Control_Lung1.6_SOX9_HOPX_SFTPC_003-MaxIP	72	429.73	24.05
Control1	2019-12-16_20X_Control_Lung1.6_SOX9_HOPX_SFTPC_003-MaxIP	26	441.35	24.96
Control1	2019-12-16_20X_Control_Lung1.6_SOX9_HOPX_SFTPC_003-MaxIP	99	454.51	24.62
Control1	2019-12-16_20X_Control_Lung1.6_SOX9_HOPX_SFTPC_003-MaxIP	79	463.8	23.45
Control1	2019-12-16_20X_Control_Lung1.6_SOX9_HOPX_SFTPC_003-MaxIP	31	470.38	22.41
Control1	2019-12-16_20X_Control_Lung1.6_SOX9_HOPX_SFTPC_003-MaxIP	43	480.06	26.72
Control1	2019-12-16_20X_Control_Lung1.6_SOX9_HOPX_SFTPC_003-MaxIP	50	487.81	27.25
Control1	2019-12-16_20X_Control_Lung1.6_SOX9_HOPX_SFTPC_003-MaxIP	135	505.23	28.83
Control1	2019-12-16_20X_Control_Lung1.6_SOX9_HOPX_SFTPC_003-MaxIP	101	511.81	27.05
Control1	2019-12-16_20X_Control_Lung1.6_SOX9_HOPX_SFTPC_003-MaxIP	49	512.58	22.28
Control1	2019-12-16_20X_Control_Lung1.6_SOX9_HOPX_SFTPC_003-MaxIP	32	518.78	22.12
Control1	2019-12-16_20X_Control_Lung1.6_SOX9_HOPX_SFTPC_003-MaxIP	19	529.62	27.9
Control1	2019-12-16_20X_Control_Lung1.6_SOX9_HOPX_SFTPC_003-MaxIP	119	553.62	20.79
Control1	2019-12-16_20X_Control_Lung1.6_SOX9_HOPX_SFTPC_003-MaxIP	77	559.04	25.32
Control1	2019-12-16_20X_Control_Lung1.6_SOX9_HOPX_SFTPC_003-MaxIP	159	560.98	28.99
Control1	2019-12-16_20X_Control_Lung1.6_SOX9_HOPX_SFTPC_003-MaxIP	161	569.49	27.42
Control1	2019-12-16_20X_Control_Lung1.6_SOX9_HOPX_SFTPC_003-MaxIP	2	574.14	29.45
Control1	2019-12-16_20X_Control_Lung1.6_SOX9_HOPX_SFTPC_003-MaxIP	36	576.46	23.01
Control1	2019-12-16_20X_Control_Lung1.6_SOX9_HOPX_SFTPC_003-MaxIP	8	581.11	27.36
Control1	2019-12-16_20X_Control_Lung1.6_SOX9_HOPX_SFTPC_003-MaxIP	128	582.27	30.82
Control1	2019-12-16_20X_Control_Lung1.6_SOX9_HOPX_SFTPC_003-MaxIP	9	586.14	25.26
Control1	2019-12-16_20X_Control_Lung1.6_SOX9_HOPX_SFTPC_003-MaxIP	166	605.11	33.51
Control1	2019-12-16_20X_Control_Lung1.6_SOX9_HOPX_SFTPC_003-MaxIP	201	607.05	34.34
Control1	2019-12-16_20X_Control_Lung1.6_SOX9_HOPX_SFTPC_003-MaxIP	133	621.76	33.6
Control1	2019-12-16_20X_Control_Lung1.6_SOX9_HOPX_SFTPC_003-MaxIP	200	629.89	22.44
Control1	2019-12-16_20X_Control_Lung1.6_SOX9_HOPX_SFTPC_003-MaxIP	59	632.99	27.79
Control1	2019-12-16_20X_Control_Lung1.6_SOX9_HOPX_SFTPC_003-MaxIP	39	644.21	26.21
Control1	2019-12-16_20X_Control_Lung1.6_SOX9_HOPX_SFTPC_003-MaxIP	41	648.08	30.17
Control1	2019-12-16_20X_Control_Lung1.6_SOX9_HOPX_SFTPC_003-MaxIP	132	665.12	27.52
Control1	2019-12-16_20X_Control_Lung1.6_SOX9_HOPX_SFTPC_003-MaxIP	96	686.41	27.42
Control1	2019-12-16_20X_Control_Lung1.6_SOX9_HOPX_SFTPC_003-MaxIP	155	687.57	34.63
Control1	2019-12-16_20X_Control_Lung1.6_SOX9_HOPX_SFTPC_003-MaxIP	163	723.58	43.77
Control1	2019-12-16_20X_Control_Lung1.6_SOX9_HOPX_SFTPC_003-MaxIP	70	730.93	32.41
Control1	2019-12-16_20X_Control_Lung1.6_SOX9_HOPX_SFTPC_003-MaxIP	37	735.19	29.65
Control1	2019-12-16_20X_Control_Lung1.6_SOX9_HOPX_SFTPC_003-MaxIP	173	735.19	33.16
Control1	2019-12-16_20X_Control_Lung1.6_SOX9_HOPX_SFTPC_003-MaxIP	52	757.65	31.24
Control1	2019-12-16_20X_Control_Lung1.6_SOX9_HOPX_SFTPC_003-MaxIP	90	774.29	31.22
Control1	2019-12-16_20X_Control_Lung1.6_SOX9_HOPX_SFTPC_003-MaxIP	196	774.68	34
Control1	2019-12-16_20X_Control_Lung1.6_SOX9_HOPX_SFTPC_003-MaxIP	115	784.36	33.18
Control1	2019-12-16_20X_Control_Lung1.6_SOX9_HOPX_SFTPC_003-MaxIP	141	785.52	37.46
Control1	2019-12-16_20X_Control_Lung1.6_SOX9_HOPX_SFTPC_003-MaxIP	86	825.4	41.35
Control1	2019-12-16_20X_Control_Lung1.6_SOX9_HOPX_SFTPC_003-MaxIP	80	843.98	35.08
Control1	2019-12-16_20X_Control_Lung1.6_SOX9_HOPX_SFTPC_003-MaxIP	20	845.92	40.23
Control1	2019-12-16_20X_Control_Lung1.6_SOX9_HOPX_SFTPC_003-MaxIP	12	866.44	32.19
Control1	2019-12-16_20X_Control_Lung1.6_SOX9_HOPX_SFTPC_003-MaxIP	10	873.79	30.49
Control1	2019-12-16_20X_Control_Lung1.6_SOX9_HOPX_SFTPC_003-MaxIP	129	886.95	30.41
Control1	2019-12-16_20X_Control_Lung1.6_SOX9_HOPX_SFTPC_003-MaxIP	139	896.63	32.6
Control1	2019-12-16_20X_Control_Lung1.6_SOX9_HOPX_SFTPC_003-MaxIP	87	935.73	35.43
Control1	2019-12-16_20X_Control_Lung1.6_SOX9_HOPX_SFTPC_003-MaxIP	121	944.25	39.05
Control1	2019-12-16_20X_Control_Lung1.6_SOX9_HOPX_SFTPC_003-MaxIP	134	968.64	38.88
Control1	2019-12-16_20X_Control_Lung1.6_SOX9_HOPX_SFTPC_003-MaxIP	158	994.58	40.95
Control1	2019-12-16_20X_Control_Lung1.6_SOX9_HOPX_SFTPC_003-MaxIP	113	1003.49	28.27
Control1	2019-12-16_20X_Control_Lung1.6_SOX9_HOPX_SFTPC_003-MaxIP	143	1029.81	43.85
Control1	2019-12-16_20X_Control_Lung1.6_SOX9_HOPX_SFTPC_003-MaxIP	176	1148.67	40.11
Control1	2019-12-16_20X_Control_Lung1.6_SOX9_HOPX_SFTPC_003-MaxIP	18	1184.28	39.15
Control1	2019-12-16_20X_Control_Lung1.6_SOX9_HOPX_SFTPC_003-MaxIP	51	1243.13	49.65
Control1	2019-12-16_20X_Control_Lung1.6_SOX9_HOPX_SFTPC_003-MaxIP	105	1334.11	50.05
Control1	2019-12-16_20X_Control_Lung1.6_SOX9_HOPX_SFTPC_003-MaxIP	30	1354.63	45.54
Control1	2019-12-16_20X_Control_Lung1.6_SOX9_HOPX_SFTPC_003-MaxIP	184	1507.94	51.44
Control1	2019-12-16_20X_Control_Lung1.6_SOX9_HOPX_SFTPC_003-MaxIP	38	1524.59	60.77
Control1	2019-12-16_20X_Control_Lung1.6_SOX9_HOPX_SFTPC_003-MaxIP	169	1549.36	50.61
Control1	2019-12-16_20X_Control_Lung1.6_SOX9_HOPX_SFTPC_003-MaxIP	111	1590.01	60.94
Control1	2019-12-16_20X_Control_Lung1.6_SOX9_HOPX_SFTPC_003-MaxIP	67	1650.41	56.24
Control1	2019-12-16_20X_Control_Lung1.6_SOX9_HOPX_SFTPC_003-MaxIP	108	1839.34	61.59
Control1	2019-12-16_20X_Control_Lung1.6_SOX9_HOPX_SFTPC_003-MaxIP	148	1899.73	53.86
Control1	2019-12-16_20X_Control_Lung1.6_SOX9_HOPX_SFTPC_003-MaxIP	13	1983.74	53.85
Control1	2019-12-16_20X_Control_Lung1.6_SOX9_HOPX_SFTPC_003-MaxIP	63	2042.98	57.07
Control1	2019-12-16_20X_Control_Lung1.6_SOX9_HOPX_SFTPC_003-MaxIP	152	2106.08	74.29
Control1	2019-12-16_20X_Control_Lung1.6_SOX9_HOPX_SFTPC_003-MaxIP	24	2216.81	49.54
Control1	2019-12-16_20X_Control_Lung1.6_SOX9_HOPX_SFTPC_003-MaxIP	167	2356.18	69.23
Control1	2019-12-16_20X_Control_Lung1.6_SOX9_HOPX_SFTPC_003-MaxIP	55	2363.53	63.56
Control1	2019-12-16_20X_Control_Lung1.6_SOX9_HOPX_SFTPC_003-MaxIP	171	2607.44	47.33
Control1	2019-12-16_20X_Control_Lung1.6_SOX9_HOPX_SFTPC_003-MaxIP	45	2639.57	61.91
Control1	2019-12-16_20X_Control_Lung1.6_SOX9_HOPX_SFTPC_003-MaxIP	165	2664.73	59.19
Control1	2019-12-16_20X_Control_Lung1.6_SOX9_HOPX_SFTPC_003-MaxIP	40	2884.25	75.8
Control1	2019-12-16_20X_Control_Lung1.6_SOX9_HOPX_SFTPC_003-MaxIP	151	2981.81	42.55
Control2	2019-12-17_20X_Control_Lung2.6_SOX9_HOPX_SFTPC_001-MaxIP	1	588.46	28.24
Control2	2019-12-17_20X_Control_Lung2.6_SOX9_HOPX_SFTPC_001-MaxIP	2	915.99	30.57
Control2	2019-12-17_20X_Control_Lung2.6_SOX9_HOPX_SFTPC_001-MaxIP	3	26395.7	187.59
Control2	2019-12-17_20X_Control_Lung2.6_SOX9_HOPX_SFTPC_001-MaxIP	4	767.33	30.17
Control2	2019-12-17_20X_Control_Lung2.6_SOX9_HOPX_SFTPC_001-MaxIP	5	376.69	21.98
Control2	2019-12-17_20X_Control_Lung2.6_SOX9_HOPX_SFTPC_001-MaxIP	6	595.82	29.89
Control2	2019-12-17_20X_Control_Lung2.6_SOX9_HOPX_SFTPC_001-MaxIP	7	1097.56	40.77
Control2	2019-12-17_20X_Control_Lung2.6_SOX9_HOPX_SFTPC_001-MaxIP	8	486.64	24.88
Control2	2019-12-17_20X_Control_Lung2.6_SOX9_HOPX_SFTPC_001-MaxIP	9	363.14	22.15
Control2	2019-12-17_20X_Control_Lung2.6_SOX9_HOPX_SFTPC_001-MaxIP	10	697.25	34.08
Control2	2019-12-17_20X_Control_Lung2.6_SOX9_HOPX_SFTPC_001-MaxIP	11	1934.96	42.6
Control2	2019-12-17_20X_Control_Lung2.6_SOX9_HOPX_SFTPC_001-MaxIP	12	9699.59	134.12
Control2	2019-12-17_20X_Control_Lung2.6_SOX9_HOPX_SFTPC_001-MaxIP	13	354.63	23.1
Control2	2019-12-17_20X_Control_Lung2.6_SOX9_HOPX_SFTPC_001-MaxIP	14	752.23	40.82
Control2	2019-12-17_20X_Control_Lung2.6_SOX9_HOPX_SFTPC_001-MaxIP	15	440.96	23.77
Control2	2019-12-17_20X_Control_Lung2.6_SOX9_HOPX_SFTPC_001-MaxIP	16	566.01	25.37
Control2	2019-12-17_20X_Control_Lung2.6_SOX9_HOPX_SFTPC_001-MaxIP	17	667.05	25.13
Control2	2019-12-17_20X_Control_Lung2.6_SOX9_HOPX_SFTPC_001-MaxIP	18	493.61	22.41
Control2	2019-12-17_20X_Control_Lung2.6_SOX9_HOPX_SFTPC_001-MaxIP	19	471.93	25.98
Control2	2019-12-17_20X_Control_Lung2.6_SOX9_HOPX_SFTPC_001-MaxIP	20	1280.68	30.3
Control2	2019-12-17_20X_Control_Lung2.6_SOX9_HOPX_SFTPC_001-MaxIP	21	351.14	21.73
Control2	2019-12-17_20X_Control_Lung2.6_SOX9_HOPX_SFTPC_001-MaxIP	22	564.07	28.92
Control2	2019-12-17_20X_Control_Lung2.6_SOX9_HOPX_SFTPC_001-MaxIP	23	423.54	20.27
Control2	2019-12-17_20X_Control_Lung2.6_SOX9_HOPX_SFTPC_001-MaxIP	24	1303.52	48.21
Control2	2019-12-17_20X_Control_Lung2.6_SOX9_HOPX_SFTPC_001-MaxIP	25	4104.92	86.29
Control2	2019-12-17_20X_Control_Lung2.6_SOX9_HOPX_SFTPC_001-MaxIP	26	316.3	24.28
Control2	2019-12-17_20X_Control_Lung2.6_SOX9_HOPX_SFTPC_001-MaxIP	27	497.48	26.36
Control2	2019-12-17_20X_Control_Lung2.6_SOX9_HOPX_SFTPC_001-MaxIP	28	481.61	26.24
Control2	2019-12-17_20X_Control_Lung2.6_SOX9_HOPX_SFTPC_001-MaxIP	29	451.8	18.25
Control2	2019-12-17_20X_Control_Lung2.6_SOX9_HOPX_SFTPC_001-MaxIP	30	588.85	25.35
Control2	2019-12-17_20X_Control_Lung2.6_SOX9_HOPX_SFTPC_001-MaxIP	31	349.21	19.33
Control2	2019-12-17_20X_Control_Lung2.6_SOX9_HOPX_SFTPC_001-MaxIP	32	4672.87	90.91
Control2	2019-12-17_20X_Control_Lung2.6_SOX9_HOPX_SFTPC_001-MaxIP	33	352.69	15.56
Control2	2019-12-17_20X_Control_Lung2.6_SOX9_HOPX_SFTPC_001-MaxIP	34	302.75	19.25
Control2	2019-12-17_20X_Control_Lung2.6_SOX9_HOPX_SFTPC_001-MaxIP	35	483.93	21.11
Control2	2019-12-17_20X_Control_Lung2.6_SOX9_HOPX_SFTPC_001-MaxIP	36	412.31	20.01
Control2	2019-12-17_20X_Control_Lung2.6_SOX9_HOPX_SFTPC_001-MaxIP	37	670.15	21.12
Control2	2019-12-17_20X_Control_Lung2.6_SOX9_HOPX_SFTPC_001-MaxIP	38	407.28	23.27
Control2	2019-12-17_20X_Control_Lung2.6_SOX9_HOPX_SFTPC_001-MaxIP	39	3969.03	78.81
Control2	2019-12-17_20X_Control_Lung2.6_SOX9_HOPX_SFTPC_001-MaxIP	40	1216.8	37.5
Control2	2019-12-17_20X_Control_Lung2.6_SOX9_HOPX_SFTPC_001-MaxIP	41	2889.28	63.09
Control2	2019-12-17_20X_Control_Lung2.6_SOX9_HOPX_SFTPC_001-MaxIP	42	342.63	22.03
Control2	2019-12-17_20X_Control_Lung2.6_SOX9_HOPX_SFTPC_001-MaxIP	43	349.59	22.39
Control2	2019-12-17_20X_Control_Lung2.6_SOX9_HOPX_SFTPC_001-MaxIP	44	897.41	26.32
Control2	2019-12-17_20X_Control_Lung2.6_SOX9_HOPX_SFTPC_001-MaxIP	45	532.71	30.11
Control2	2019-12-17_20X_Control_Lung2.6_SOX9_HOPX_SFTPC_001-MaxIP	46	2957.42	69.31
Control2	2019-12-17_20X_Control_Lung2.6_SOX9_HOPX_SFTPC_001-MaxIP	47	1474.64	33.93
Control2	2019-12-17_20X_Control_Lung2.6_SOX9_HOPX_SFTPC_001-MaxIP	48	536.97	29.91
Control2	2019-12-17_20X_Control_Lung2.6_SOX9_HOPX_SFTPC_001-MaxIP	49	506.39	25.78
Control2	2019-12-17_20X_Control_Lung2.6_SOX9_HOPX_SFTPC_001-MaxIP	50	659.7	21.58
Control2	2019-12-17_20X_Control_Lung2.6_SOX9_HOPX_SFTPC_001-MaxIP	51	327.53	21.24
Control2	2019-12-17_20X_Control_Lung2.6_SOX9_HOPX_SFTPC_001-MaxIP	52	965.93	33.5
Control2	2019-12-17_20X_Control_Lung2.6_SOX9_HOPX_SFTPC_001-MaxIP	53	790.17	28.11
Control2	2019-12-17_20X_Control_Lung2.6_SOX9_HOPX_SFTPC_001-MaxIP	54	2004.65	50.41
Control2	2019-12-17_20X_Control_Lung2.6_SOX9_HOPX_SFTPC_001-MaxIP	55	562.52	28.73
Control2	2019-12-17_20X_Control_Lung2.6_SOX9_HOPX_SFTPC_001-MaxIP	56	469.22	26.39
Control2	2019-12-17_20X_Control_Lung2.6_SOX9_HOPX_SFTPC_001-MaxIP	57	1344.95	45.12
Control2	2019-12-17_20X_Control_Lung2.6_SOX9_HOPX_SFTPC_001-MaxIP	58	425.47	24.75
Control2	2019-12-17_20X_Control_Lung2.6_SOX9_HOPX_SFTPC_001-MaxIP	59	6411.16	84.41
Control2	2019-12-17_20X_Control_Lung2.6_SOX9_HOPX_SFTPC_001-MaxIP	60	673.25	32.65
Control2	2019-12-17_20X_Control_Lung2.6_SOX9_HOPX_SFTPC_001-MaxIP	61	587.3	27.63
Control2	2019-12-17_20X_Control_Lung2.6_SOX9_HOPX_SFTPC_001-MaxIP	62	21993.1	210.01
Control2	2019-12-17_20X_Control_Lung2.6_SOX9_HOPX_SFTPC_001-MaxIP	63	495.55	21.67
Control2	2019-12-17_20X_Control_Lung2.6_SOX9_HOPX_SFTPC_001-MaxIP	64	650.41	32.65
Control2	2019-12-17_20X_Control_Lung2.6_SOX9_HOPX_SFTPC_001-MaxIP	65	4657.38	74.35
Control2	2019-12-17_20X_Control_Lung2.6_SOX9_HOPX_SFTPC_001-MaxIP	66	930.31	32.35
Control2	2019-12-17_20X_Control_Lung2.6_SOX9_HOPX_SFTPC_001-MaxIP	67	2627.57	45.79
Control2	2019-12-17_20X_Control_Lung2.6_SOX9_HOPX_SFTPC_001-MaxIP	68	1921.02	51.16
Control2	2019-12-17_20X_Control_Lung2.6_SOX9_HOPX_SFTPC_001-MaxIP	69	825.01	28.39
Control2	2019-12-17_20X_Control_Lung2.6_SOX9_HOPX_SFTPC_001-MaxIP	70	398.37	22.96
Control2	2019-12-17_20X_Control_Lung2.6_SOX9_HOPX_SFTPC_001-MaxIP	71	657.76	32.71
Control2	2019-12-17_20X_Control_Lung2.6_SOX9_HOPX_SFTPC_001-MaxIP	72	329.85	21.63
Control2	2019-12-17_20X_Control_Lung2.6_SOX9_HOPX_SFTPC_001-MaxIP	73	367.02	21.66
Control2	2019-12-17_20X_Control_Lung2.6_SOX9_HOPX_SFTPC_001-MaxIP	74	628.34	24.31
Control2	2019-12-17_20X_Control_Lung2.6_SOX9_HOPX_SFTPC_001-MaxIP	75	310.1	22.98
Control2	2019-12-17_20X_Control_Lung2.6_SOX9_HOPX_SFTPC_001-MaxIP	76	710.03	33.07
Control2	2019-12-17_20X_Control_Lung2.6_SOX9_HOPX_SFTPC_001-MaxIP	77	1013.16	41.51
Control2	2019-12-17_20X_Control_Lung2.6_SOX9_HOPX_SFTPC_001-MaxIP	78	363.53	19.12
Control2	2019-12-17_20X_Control_Lung2.6_SOX9_HOPX_SFTPC_001-MaxIP	79	537.75	24.57
Control2	2019-12-17_20X_Control_Lung2.6_SOX9_HOPX_SFTPC_001-MaxIP	80	292.68	20.57
Control2	2019-12-17_20X_Control_Lung2.6_SOX9_HOPX_SFTPC_001-MaxIP	81	895.08	30.54
Control2	2019-12-17_20X_Control_Lung2.6_SOX9_HOPX_SFTPC_001-MaxIP	82	1637.63	50.04
Control2	2019-12-17_20X_Control_Lung2.6_SOX9_HOPX_SFTPC_001-MaxIP	83	691.83	32.86
Control2	2019-12-17_20X_Control_Lung2.6_SOX9_HOPX_SFTPC_001-MaxIP	84	386.37	21.12
Control2	2019-12-17_20X_Control_Lung2.6_SOX9_HOPX_SFTPC_001-MaxIP	85	590.79	25.43
Control2	2019-12-17_20X_Control_Lung2.6_SOX9_HOPX_SFTPC_001-MaxIP	86	467.67	26.42
Control2	2019-12-17_20X_Control_Lung2.6_SOX9_HOPX_SFTPC_001-MaxIP	87	436.7	14.21
Control2	2019-12-17_20X_Control_Lung2.6_SOX9_HOPX_SFTPC_001-MaxIP	88	890.83	37.18
Control2	2019-12-17_20X_Control_Lung2.6_SOX9_HOPX_SFTPC_001-MaxIP	89	940.38	28.38
Control2	2019-12-17_20X_Control_Lung2.6_SOX9_HOPX_SFTPC_001-MaxIP	90	918.7	25.22
Control2	2019-12-17_20X_Control_Lung2.6_SOX9_HOPX_SFTPC_001-MaxIP	91	403.79	21.09
Control2	2019-12-17_20X_Control_Lung2.6_SOX9_HOPX_SFTPC_001-MaxIP	92	988.39	39
Control2	2019-12-17_20X_Control_Lung2.6_SOX9_HOPX_SFTPC_001-MaxIP	93	309.33	18.36
Control2	2019-12-17_20X_Control_Lung2.6_SOX9_HOPX_SFTPC_001-MaxIP	94	694.54	25.81
Control2	2019-12-17_20X_Control_Lung2.6_SOX9_HOPX_SFTPC_001-MaxIP	95	1025.17	40.98
Control2	2019-12-17_20X_Control_Lung2.6_SOX9_HOPX_SFTPC_001-MaxIP	96	362.37	20.33
Control2	2019-12-17_20X_Control_Lung2.6_SOX9_HOPX_SFTPC_001-MaxIP	97	353.47	17.89
Control2	2019-12-17_20X_Control_Lung2.6_SOX9_HOPX_SFTPC_001-MaxIP	98	794.04	25.63
Control2	2019-12-17_20X_Control_Lung2.6_SOX9_HOPX_SFTPC_001-MaxIP	99	411.15	23.27
Control2	2019-12-17_20X_Control_Lung2.6_SOX9_HOPX_SFTPC_001-MaxIP	100	363.14	20.26
Control2	2019-12-17_20X_Control_Lung2.6_SOX9_HOPX_SFTPC_001-MaxIP	101	632.6	29.26
Control2	2019-12-17_20X_Control_Lung2.6_SOX9_HOPX_SFTPC_002-MaxIP	153	51.1	7.43
Control2	2019-12-17_20X_Control_Lung2.6_SOX9_HOPX_SFTPC_002-MaxIP	25	51.49	8.48
Control2	2019-12-17_20X_Control_Lung2.6_SOX9_HOPX_SFTPC_002-MaxIP	85	51.49	7.94
Control2	2019-12-17_20X_Control_Lung2.6_SOX9_HOPX_SFTPC_002-MaxIP	43	51.88	8.14
Control2	2019-12-17_20X_Control_Lung2.6_SOX9_HOPX_SFTPC_002-MaxIP	31	54.59	8.33
Control2	2019-12-17_20X_Control_Lung2.6_SOX9_HOPX_SFTPC_002-MaxIP	26	56.52	7.87
Control2	2019-12-17_20X_Control_Lung2.6_SOX9_HOPX_SFTPC_002-MaxIP	101	56.52	7.36
Control2	2019-12-17_20X_Control_Lung2.6_SOX9_HOPX_SFTPC_002-MaxIP	68	57.68	7.52
Control2	2019-12-17_20X_Control_Lung2.6_SOX9_HOPX_SFTPC_002-MaxIP	23	59.62	9.77
Control2	2019-12-17_20X_Control_Lung2.6_SOX9_HOPX_SFTPC_002-MaxIP	29	59.62	9.5
Control2	2019-12-17_20X_Control_Lung2.6_SOX9_HOPX_SFTPC_002-MaxIP	159	63.11	11.24
Control2	2019-12-17_20X_Control_Lung2.6_SOX9_HOPX_SFTPC_002-MaxIP	108	72.78	9.96
Control2	2019-12-17_20X_Control_Lung2.6_SOX9_HOPX_SFTPC_002-MaxIP	38	74.33	9.69
Control2	2019-12-17_20X_Control_Lung2.6_SOX9_HOPX_SFTPC_002-MaxIP	91	74.33	10
Control2	2019-12-17_20X_Control_Lung2.6_SOX9_HOPX_SFTPC_002-MaxIP	109	76.27	9.19
Control2	2019-12-17_20X_Control_Lung2.6_SOX9_HOPX_SFTPC_002-MaxIP	6	76.66	8.64
Control2	2019-12-17_20X_Control_Lung2.6_SOX9_HOPX_SFTPC_002-MaxIP	36	77.82	9.07
Control2	2019-12-17_20X_Control_Lung2.6_SOX9_HOPX_SFTPC_002-MaxIP	123	80.14	8.16
Control2	2019-12-17_20X_Control_Lung2.6_SOX9_HOPX_SFTPC_002-MaxIP	148	80.91	9.35
Control2	2019-12-17_20X_Control_Lung2.6_SOX9_HOPX_SFTPC_002-MaxIP	7	82.08	7.49
Control2	2019-12-17_20X_Control_Lung2.6_SOX9_HOPX_SFTPC_002-MaxIP	74	90.98	8.94
Control2	2019-12-17_20X_Control_Lung2.6_SOX9_HOPX_SFTPC_002-MaxIP	138	93.3	9.23
Control2	2019-12-17_20X_Control_Lung2.6_SOX9_HOPX_SFTPC_002-MaxIP	125	93.69	10.72
Control2	2019-12-17_20X_Control_Lung2.6_SOX9_HOPX_SFTPC_002-MaxIP	142	100.27	8.59
Control2	2019-12-17_20X_Control_Lung2.6_SOX9_HOPX_SFTPC_002-MaxIP	149	100.27	11.33
Control2	2019-12-17_20X_Control_Lung2.6_SOX9_HOPX_SFTPC_002-MaxIP	119	101.05	9.21
Control2	2019-12-17_20X_Control_Lung2.6_SOX9_HOPX_SFTPC_002-MaxIP	97	106.08	10.73
Control2	2019-12-17_20X_Control_Lung2.6_SOX9_HOPX_SFTPC_002-MaxIP	132	107.24	12.65
Control2	2019-12-17_20X_Control_Lung2.6_SOX9_HOPX_SFTPC_002-MaxIP	157	115.37	11.11
Control2	2019-12-17_20X_Control_Lung2.6_SOX9_HOPX_SFTPC_002-MaxIP	89	127.76	14.34
Control2	2019-12-17_20X_Control_Lung2.6_SOX9_HOPX_SFTPC_002-MaxIP	39	128.92	13.35
Control2	2019-12-17_20X_Control_Lung2.6_SOX9_HOPX_SFTPC_002-MaxIP	83	129.69	12.04
Control2	2019-12-17_20X_Control_Lung2.6_SOX9_HOPX_SFTPC_002-MaxIP	27	131.24	10.83
Control2	2019-12-17_20X_Control_Lung2.6_SOX9_HOPX_SFTPC_002-MaxIP	33	135.5	12.08
Control2	2019-12-17_20X_Control_Lung2.6_SOX9_HOPX_SFTPC_002-MaxIP	80	145.95	10.56
Control2	2019-12-17_20X_Control_Lung2.6_SOX9_HOPX_SFTPC_002-MaxIP	8	149.44	10.05
Control2	2019-12-17_20X_Control_Lung2.6_SOX9_HOPX_SFTPC_002-MaxIP	161	152.92	10.24
Control2	2019-12-17_20X_Control_Lung2.6_SOX9_HOPX_SFTPC_002-MaxIP	126	156.02	12.56
Control2	2019-12-17_20X_Control_Lung2.6_SOX9_HOPX_SFTPC_002-MaxIP	50	156.79	14.82
Control2	2019-12-17_20X_Control_Lung2.6_SOX9_HOPX_SFTPC_002-MaxIP	30	160.67	11.85
Control2	2019-12-17_20X_Control_Lung2.6_SOX9_HOPX_SFTPC_002-MaxIP	86	160.67	11.96
Control2	2019-12-17_20X_Control_Lung2.6_SOX9_HOPX_SFTPC_002-MaxIP	35	163.38	16.3
Control2	2019-12-17_20X_Control_Lung2.6_SOX9_HOPX_SFTPC_002-MaxIP	93	168.02	14.02
Control2	2019-12-17_20X_Control_Lung2.6_SOX9_HOPX_SFTPC_002-MaxIP	14	174.22	14.65
Control2	2019-12-17_20X_Control_Lung2.6_SOX9_HOPX_SFTPC_002-MaxIP	11	175.76	14.24
Control2	2019-12-17_20X_Control_Lung2.6_SOX9_HOPX_SFTPC_002-MaxIP	49	183.89	15.92
Control2	2019-12-17_20X_Control_Lung2.6_SOX9_HOPX_SFTPC_002-MaxIP	131	186.22	10.1
Control2	2019-12-17_20X_Control_Lung2.6_SOX9_HOPX_SFTPC_002-MaxIP	110	189.7	17.27
Control2	2019-12-17_20X_Control_Lung2.6_SOX9_HOPX_SFTPC_002-MaxIP	100	204.03	17.13
Control2	2019-12-17_20X_Control_Lung2.6_SOX9_HOPX_SFTPC_002-MaxIP	151	207.51	13.35
Control2	2019-12-17_20X_Control_Lung2.6_SOX9_HOPX_SFTPC_002-MaxIP	113	208.67	16.08
Control2	2019-12-17_20X_Control_Lung2.6_SOX9_HOPX_SFTPC_002-MaxIP	37	209.83	14.91
Control2	2019-12-17_20X_Control_Lung2.6_SOX9_HOPX_SFTPC_002-MaxIP	163	212.93	12.71
Control2	2019-12-17_20X_Control_Lung2.6_SOX9_HOPX_SFTPC_002-MaxIP	20	213.32	13.75
Control2	2019-12-17_20X_Control_Lung2.6_SOX9_HOPX_SFTPC_002-MaxIP	16	214.09	16.76
Control2	2019-12-17_20X_Control_Lung2.6_SOX9_HOPX_SFTPC_002-MaxIP	58	216.42	15.86
Control2	2019-12-17_20X_Control_Lung2.6_SOX9_HOPX_SFTPC_002-MaxIP	12	222.22	16.29
Control2	2019-12-17_20X_Control_Lung2.6_SOX9_HOPX_SFTPC_002-MaxIP	76	223.38	15.99
Control2	2019-12-17_20X_Control_Lung2.6_SOX9_HOPX_SFTPC_002-MaxIP	94	226.87	14.73
Control2	2019-12-17_20X_Control_Lung2.6_SOX9_HOPX_SFTPC_002-MaxIP	87	239.26	20.5
Control2	2019-12-17_20X_Control_Lung2.6_SOX9_HOPX_SFTPC_002-MaxIP	66	243.9	17.83
Control2	2019-12-17_20X_Control_Lung2.6_SOX9_HOPX_SFTPC_002-MaxIP	79	248.55	14.14
Control2	2019-12-17_20X_Control_Lung2.6_SOX9_HOPX_SFTPC_002-MaxIP	127	249.71	15.46
Control2	2019-12-17_20X_Control_Lung2.6_SOX9_HOPX_SFTPC_002-MaxIP	40	252.81	17.78
Control2	2019-12-17_20X_Control_Lung2.6_SOX9_HOPX_SFTPC_002-MaxIP	54	254.36	14.25
Control2	2019-12-17_20X_Control_Lung2.6_SOX9_HOPX_SFTPC_002-MaxIP	44	256.68	14.39
Control2	2019-12-17_20X_Control_Lung2.6_SOX9_HOPX_SFTPC_002-MaxIP	137	269.07	15.6
Control2	2019-12-17_20X_Control_Lung2.6_SOX9_HOPX_SFTPC_002-MaxIP	63	281.46	17.2
Control2	2019-12-17_20X_Control_Lung2.6_SOX9_HOPX_SFTPC_002-MaxIP	56	287.26	16.47
Control2	2019-12-17_20X_Control_Lung2.6_SOX9_HOPX_SFTPC_002-MaxIP	59	288.81	20.76
Control2	2019-12-17_20X_Control_Lung2.6_SOX9_HOPX_SFTPC_002-MaxIP	28	293.07	19.74
Control2	2019-12-17_20X_Control_Lung2.6_SOX9_HOPX_SFTPC_002-MaxIP	92	295.39	18.35
Control2	2019-12-17_20X_Control_Lung2.6_SOX9_HOPX_SFTPC_002-MaxIP	156	295.78	16.43
Control2	2019-12-17_20X_Control_Lung2.6_SOX9_HOPX_SFTPC_002-MaxIP	42	300.04	19.88
Control2	2019-12-17_20X_Control_Lung2.6_SOX9_HOPX_SFTPC_002-MaxIP	90	303.14	15.88
Control2	2019-12-17_20X_Control_Lung2.6_SOX9_HOPX_SFTPC_002-MaxIP	116	315.14	18.78
Control2	2019-12-17_20X_Control_Lung2.6_SOX9_HOPX_SFTPC_002-MaxIP	118	317.46	21.2
Control2	2019-12-17_20X_Control_Lung2.6_SOX9_HOPX_SFTPC_002-MaxIP	41	324.82	22.08
Control2	2019-12-17_20X_Control_Lung2.6_SOX9_HOPX_SFTPC_002-MaxIP	77	325.2	22.5
Control2	2019-12-17_20X_Control_Lung2.6_SOX9_HOPX_SFTPC_002-MaxIP	111	325.98	17.49
Control2	2019-12-17_20X_Control_Lung2.6_SOX9_HOPX_SFTPC_002-MaxIP	64	330.24	16.81
Control2	2019-12-17_20X_Control_Lung2.6_SOX9_HOPX_SFTPC_002-MaxIP	2	335.66	19.42
Control2	2019-12-17_20X_Control_Lung2.6_SOX9_HOPX_SFTPC_002-MaxIP	135	336.43	21.86
Control2	2019-12-17_20X_Control_Lung2.6_SOX9_HOPX_SFTPC_002-MaxIP	75	342.24	24.79
Control2	2019-12-17_20X_Control_Lung2.6_SOX9_HOPX_SFTPC_002-MaxIP	24	344.95	23.7
Control2	2019-12-17_20X_Control_Lung2.6_SOX9_HOPX_SFTPC_002-MaxIP	55	350.76	19.73
Control2	2019-12-17_20X_Control_Lung2.6_SOX9_HOPX_SFTPC_002-MaxIP	62	351.53	19.32
Control2	2019-12-17_20X_Control_Lung2.6_SOX9_HOPX_SFTPC_002-MaxIP	120	352.69	22.52
Control2	2019-12-17_20X_Control_Lung2.6_SOX9_HOPX_SFTPC_002-MaxIP	162	353.08	17.64
Control2	2019-12-17_20X_Control_Lung2.6_SOX9_HOPX_SFTPC_002-MaxIP	78	368.56	21.92
Control2	2019-12-17_20X_Control_Lung2.6_SOX9_HOPX_SFTPC_002-MaxIP	141	369.34	17.86
Control2	2019-12-17_20X_Control_Lung2.6_SOX9_HOPX_SFTPC_002-MaxIP	18	372.44	19.61
Control2	2019-12-17_20X_Control_Lung2.6_SOX9_HOPX_SFTPC_002-MaxIP	129	378.63	15.45
Control2	2019-12-17_20X_Control_Lung2.6_SOX9_HOPX_SFTPC_002-MaxIP	51	383.66	20.48
Control2	2019-12-17_20X_Control_Lung2.6_SOX9_HOPX_SFTPC_002-MaxIP	128	390.24	17.6
Control2	2019-12-17_20X_Control_Lung2.6_SOX9_HOPX_SFTPC_002-MaxIP	15	392.57	22.47
Control2	2019-12-17_20X_Control_Lung2.6_SOX9_HOPX_SFTPC_002-MaxIP	52	395.66	21.54
Control2	2019-12-17_20X_Control_Lung2.6_SOX9_HOPX_SFTPC_002-MaxIP	140	396.44	17.51
Control2	2019-12-17_20X_Control_Lung2.6_SOX9_HOPX_SFTPC_002-MaxIP	34	404.96	21.96
Control2	2019-12-17_20X_Control_Lung2.6_SOX9_HOPX_SFTPC_002-MaxIP	154	433.99	26.09
Control2	2019-12-17_20X_Control_Lung2.6_SOX9_HOPX_SFTPC_002-MaxIP	53	467.29	23.55
Control2	2019-12-17_20X_Control_Lung2.6_SOX9_HOPX_SFTPC_002-MaxIP	134	478.51	25.66
Control2	2019-12-17_20X_Control_Lung2.6_SOX9_HOPX_SFTPC_002-MaxIP	115	482.77	20.33
Control2	2019-12-17_20X_Control_Lung2.6_SOX9_HOPX_SFTPC_002-MaxIP	22	490.9	21.16
Control2	2019-12-17_20X_Control_Lung2.6_SOX9_HOPX_SFTPC_002-MaxIP	105	490.9	24.22
Control2	2019-12-17_20X_Control_Lung2.6_SOX9_HOPX_SFTPC_002-MaxIP	112	494	20.95
Control2	2019-12-17_20X_Control_Lung2.6_SOX9_HOPX_SFTPC_002-MaxIP	152	502.9	19.29
Control2	2019-12-17_20X_Control_Lung2.6_SOX9_HOPX_SFTPC_002-MaxIP	45	507.16	21.65
Control2	2019-12-17_20X_Control_Lung2.6_SOX9_HOPX_SFTPC_002-MaxIP	160	507.94	32.48
Control2	2019-12-17_20X_Control_Lung2.6_SOX9_HOPX_SFTPC_002-MaxIP	65	518.78	24.34
Control2	2019-12-17_20X_Control_Lung2.6_SOX9_HOPX_SFTPC_002-MaxIP	9	530.39	25.72
Control2	2019-12-17_20X_Control_Lung2.6_SOX9_HOPX_SFTPC_002-MaxIP	121	531.55	29.94
Control2	2019-12-17_20X_Control_Lung2.6_SOX9_HOPX_SFTPC_002-MaxIP	3	545.1	24.9
Control2	2019-12-17_20X_Control_Lung2.6_SOX9_HOPX_SFTPC_002-MaxIP	96	545.49	33.68
Control2	2019-12-17_20X_Control_Lung2.6_SOX9_HOPX_SFTPC_002-MaxIP	106	561.36	23.73
Control2	2019-12-17_20X_Control_Lung2.6_SOX9_HOPX_SFTPC_002-MaxIP	17	572.98	32.36
Control2	2019-12-17_20X_Control_Lung2.6_SOX9_HOPX_SFTPC_002-MaxIP	144	576.85	22.23
Control2	2019-12-17_20X_Control_Lung2.6_SOX9_HOPX_SFTPC_002-MaxIP	133	580.33	19.48
Control2	2019-12-17_20X_Control_Lung2.6_SOX9_HOPX_SFTPC_002-MaxIP	98	587.69	22.04
Control2	2019-12-17_20X_Control_Lung2.6_SOX9_HOPX_SFTPC_002-MaxIP	155	589.63	27.02
Control2	2019-12-17_20X_Control_Lung2.6_SOX9_HOPX_SFTPC_002-MaxIP	117	598.14	26.57
Control2	2019-12-17_20X_Control_Lung2.6_SOX9_HOPX_SFTPC_002-MaxIP	67	606.66	24.63
Control2	2019-12-17_20X_Control_Lung2.6_SOX9_HOPX_SFTPC_002-MaxIP	81	618.27	24.69
Control2	2019-12-17_20X_Control_Lung2.6_SOX9_HOPX_SFTPC_002-MaxIP	5	641.12	30.62
Control2	2019-12-17_20X_Control_Lung2.6_SOX9_HOPX_SFTPC_002-MaxIP	60	674.41	19.69
Control2	2019-12-17_20X_Control_Lung2.6_SOX9_HOPX_SFTPC_002-MaxIP	69	679.06	30.1
Control2	2019-12-17_20X_Control_Lung2.6_SOX9_HOPX_SFTPC_002-MaxIP	95	690.67	23.19
Control2	2019-12-17_20X_Control_Lung2.6_SOX9_HOPX_SFTPC_002-MaxIP	61	701.9	26.27
Control2	2019-12-17_20X_Control_Lung2.6_SOX9_HOPX_SFTPC_002-MaxIP	72	721.64	30.72
Control2	2019-12-17_20X_Control_Lung2.6_SOX9_HOPX_SFTPC_002-MaxIP	99	728.22	28.64
Control2	2019-12-17_20X_Control_Lung2.6_SOX9_HOPX_SFTPC_002-MaxIP	146	792.88	33.1
Control2	2019-12-17_20X_Control_Lung2.6_SOX9_HOPX_SFTPC_002-MaxIP	13	796.36	31.31
Control2	2019-12-17_20X_Control_Lung2.6_SOX9_HOPX_SFTPC_002-MaxIP	158	849.01	23.94
Control2	2019-12-17_20X_Control_Lung2.6_SOX9_HOPX_SFTPC_002-MaxIP	10	874.18	30.44
Control2	2019-12-17_20X_Control_Lung2.6_SOX9_HOPX_SFTPC_002-MaxIP	124	907.09	34.74
Control2	2019-12-17_20X_Control_Lung2.6_SOX9_HOPX_SFTPC_002-MaxIP	32	909.02	33.8
Control2	2019-12-17_20X_Control_Lung2.6_SOX9_HOPX_SFTPC_002-MaxIP	150	910.18	44.26
Control2	2019-12-17_20X_Control_Lung2.6_SOX9_HOPX_SFTPC_002-MaxIP	19	924.89	30.73
Control2	2019-12-17_20X_Control_Lung2.6_SOX9_HOPX_SFTPC_002-MaxIP	114	981.81	33.91
Control2	2019-12-17_20X_Control_Lung2.6_SOX9_HOPX_SFTPC_002-MaxIP	136	993.03	30.79
Control2	2019-12-17_20X_Control_Lung2.6_SOX9_HOPX_SFTPC_002-MaxIP	130	1026.71	33.96
Control2	2019-12-17_20X_Control_Lung2.6_SOX9_HOPX_SFTPC_002-MaxIP	70	1087.88	43.17
Control2	2019-12-17_20X_Control_Lung2.6_SOX9_HOPX_SFTPC_002-MaxIP	139	1088.27	38.95
Control2	2019-12-17_20X_Control_Lung2.6_SOX9_HOPX_SFTPC_002-MaxIP	145	1096.01	42.07
Control2	2019-12-17_20X_Control_Lung2.6_SOX9_HOPX_SFTPC_002-MaxIP	143	1098.72	37.78
Control2	2019-12-17_20X_Control_Lung2.6_SOX9_HOPX_SFTPC_002-MaxIP	147	1195.51	42.16
Control2	2019-12-17_20X_Control_Lung2.6_SOX9_HOPX_SFTPC_002-MaxIP	104	1207.9	32.31
Control2	2019-12-17_20X_Control_Lung2.6_SOX9_HOPX_SFTPC_002-MaxIP	82	1293.46	36.67
Control2	2019-12-17_20X_Control_Lung2.6_SOX9_HOPX_SFTPC_002-MaxIP	107	1299.65	44.68
Control2	2019-12-17_20X_Control_Lung2.6_SOX9_HOPX_SFTPC_002-MaxIP	21	1386.37	39.71
Control2	2019-12-17_20X_Control_Lung2.6_SOX9_HOPX_SFTPC_002-MaxIP	48	1431.28	45.4
Control2	2019-12-17_20X_Control_Lung2.6_SOX9_HOPX_SFTPC_002-MaxIP	47	1579.56	39.93
Control2	2019-12-17_20X_Control_Lung2.6_SOX9_HOPX_SFTPC_002-MaxIP	84	1622.53	29.06
Control2	2019-12-17_20X_Control_Lung2.6_SOX9_HOPX_SFTPC_002-MaxIP	71	1780.88	55.16
Control2	2019-12-17_20X_Control_Lung2.6_SOX9_HOPX_SFTPC_002-MaxIP	73	1791.72	56.12
Control2	2019-12-17_20X_Control_Lung2.6_SOX9_HOPX_SFTPC_002-MaxIP	103	1854.05	55.66
Control2	2019-12-17_20X_Control_Lung2.6_SOX9_HOPX_SFTPC_002-MaxIP	122	2152.93	49
Control2	2019-12-17_20X_Control_Lung2.6_SOX9_HOPX_SFTPC_002-MaxIP	46	2166.86	63.88
Control2	2019-12-17_20X_Control_Lung2.6_SOX9_HOPX_SFTPC_002-MaxIP	4	2322.11	53.47
Control2	2019-12-17_20X_Control_Lung2.6_SOX9_HOPX_SFTPC_002-MaxIP	102	3018.2	57.45
Control2	2019-12-17_20X_Control_Lung2.6_SOX9_HOPX_SFTPC_002-MaxIP	57	3646.93	81.39
Control2	2019-12-17_20X_Control_Lung2.6_SOX9_HOPX_SFTPC_003-MaxIP	13	54.97	10.05
Control2	2019-12-17_20X_Control_Lung2.6_SOX9_HOPX_SFTPC_003-MaxIP	59	56.52	7.2
Control2	2019-12-17_20X_Control_Lung2.6_SOX9_HOPX_SFTPC_003-MaxIP	185	57.68	6.1
Control2	2019-12-17_20X_Control_Lung2.6_SOX9_HOPX_SFTPC_003-MaxIP	28	61.17	10.26
Control2	2019-12-17_20X_Control_Lung2.6_SOX9_HOPX_SFTPC_003-MaxIP	106	62.33	6.77
Control2	2019-12-17_20X_Control_Lung2.6_SOX9_HOPX_SFTPC_003-MaxIP	55	65.43	12.35
Control2	2019-12-17_20X_Control_Lung2.6_SOX9_HOPX_SFTPC_003-MaxIP	194	65.82	6.39
Control2	2019-12-17_20X_Control_Lung2.6_SOX9_HOPX_SFTPC_003-MaxIP	207	66.2	9.15
Control2	2019-12-17_20X_Control_Lung2.6_SOX9_HOPX_SFTPC_003-MaxIP	11	68.14	8.61
Control2	2019-12-17_20X_Control_Lung2.6_SOX9_HOPX_SFTPC_003-MaxIP	20	68.14	6.2
Control2	2019-12-17_20X_Control_Lung2.6_SOX9_HOPX_SFTPC_003-MaxIP	186	68.14	10.13
Control2	2019-12-17_20X_Control_Lung2.6_SOX9_HOPX_SFTPC_003-MaxIP	82	68.53	8.41
Control2	2019-12-17_20X_Control_Lung2.6_SOX9_HOPX_SFTPC_003-MaxIP	19	68.91	10.03
Control2	2019-12-17_20X_Control_Lung2.6_SOX9_HOPX_SFTPC_003-MaxIP	1	69.69	9.09
Control2	2019-12-17_20X_Control_Lung2.6_SOX9_HOPX_SFTPC_003-MaxIP	188	70.07	8.52
Control2	2019-12-17_20X_Control_Lung2.6_SOX9_HOPX_SFTPC_003-MaxIP	201	70.85	6.61
Control2	2019-12-17_20X_Control_Lung2.6_SOX9_HOPX_SFTPC_003-MaxIP	46	71.24	6.12
Control2	2019-12-17_20X_Control_Lung2.6_SOX9_HOPX_SFTPC_003-MaxIP	49	71.24	8.87
Control2	2019-12-17_20X_Control_Lung2.6_SOX9_HOPX_SFTPC_003-MaxIP	22	72.4	9.08
Control2	2019-12-17_20X_Control_Lung2.6_SOX9_HOPX_SFTPC_003-MaxIP	142	73.17	10.57
Control2	2019-12-17_20X_Control_Lung2.6_SOX9_HOPX_SFTPC_003-MaxIP	57	73.56	8.44
Control2	2019-12-17_20X_Control_Lung2.6_SOX9_HOPX_SFTPC_003-MaxIP	139	73.95	10.28
Control2	2019-12-17_20X_Control_Lung2.6_SOX9_HOPX_SFTPC_003-MaxIP	180	73.95	9.31
Control2	2019-12-17_20X_Control_Lung2.6_SOX9_HOPX_SFTPC_003-MaxIP	32	77.43	9.53
Control2	2019-12-17_20X_Control_Lung2.6_SOX9_HOPX_SFTPC_003-MaxIP	34	80.14	7.26
Control2	2019-12-17_20X_Control_Lung2.6_SOX9_HOPX_SFTPC_003-MaxIP	147	82.85	11.64
Control2	2019-12-17_20X_Control_Lung2.6_SOX9_HOPX_SFTPC_003-MaxIP	14	83.62	9.87
Control2	2019-12-17_20X_Control_Lung2.6_SOX9_HOPX_SFTPC_003-MaxIP	166	85.95	10.75
Control2	2019-12-17_20X_Control_Lung2.6_SOX9_HOPX_SFTPC_003-MaxIP	181	89.04	13.44
Control2	2019-12-17_20X_Control_Lung2.6_SOX9_HOPX_SFTPC_003-MaxIP	33	93.69	13.06
Control2	2019-12-17_20X_Control_Lung2.6_SOX9_HOPX_SFTPC_003-MaxIP	98	96.4	10.51
Control2	2019-12-17_20X_Control_Lung2.6_SOX9_HOPX_SFTPC_003-MaxIP	159	96.4	11.79
Control2	2019-12-17_20X_Control_Lung2.6_SOX9_HOPX_SFTPC_003-MaxIP	87	96.79	10.78
Control2	2019-12-17_20X_Control_Lung2.6_SOX9_HOPX_SFTPC_003-MaxIP	174	100.27	12.31
Control2	2019-12-17_20X_Control_Lung2.6_SOX9_HOPX_SFTPC_003-MaxIP	143	100.66	10.76
Control2	2019-12-17_20X_Control_Lung2.6_SOX9_HOPX_SFTPC_003-MaxIP	107	103.37	11.67
Control2	2019-12-17_20X_Control_Lung2.6_SOX9_HOPX_SFTPC_003-MaxIP	18	104.92	10.97
Control2	2019-12-17_20X_Control_Lung2.6_SOX9_HOPX_SFTPC_003-MaxIP	10	105.69	10.49
Control2	2019-12-17_20X_Control_Lung2.6_SOX9_HOPX_SFTPC_003-MaxIP	167	106.85	11.08
Control2	2019-12-17_20X_Control_Lung2.6_SOX9_HOPX_SFTPC_003-MaxIP	3	108.4	13
Control2	2019-12-17_20X_Control_Lung2.6_SOX9_HOPX_SFTPC_003-MaxIP	164	111.89	13.01
Control2	2019-12-17_20X_Control_Lung2.6_SOX9_HOPX_SFTPC_003-MaxIP	95	112.27	10.4
Control2	2019-12-17_20X_Control_Lung2.6_SOX9_HOPX_SFTPC_003-MaxIP	97	113.43	11.04
Control2	2019-12-17_20X_Control_Lung2.6_SOX9_HOPX_SFTPC_003-MaxIP	2	116.53	13.38
Control2	2019-12-17_20X_Control_Lung2.6_SOX9_HOPX_SFTPC_003-MaxIP	189	116.53	13.66
Control2	2019-12-17_20X_Control_Lung2.6_SOX9_HOPX_SFTPC_003-MaxIP	74	119.63	10.84
Control2	2019-12-17_20X_Control_Lung2.6_SOX9_HOPX_SFTPC_003-MaxIP	23	120.4	12.14
Control2	2019-12-17_20X_Control_Lung2.6_SOX9_HOPX_SFTPC_003-MaxIP	177	121.56	12.24
Control2	2019-12-17_20X_Control_Lung2.6_SOX9_HOPX_SFTPC_003-MaxIP	100	123.89	13.89
Control2	2019-12-17_20X_Control_Lung2.6_SOX9_HOPX_SFTPC_003-MaxIP	120	123.89	14.65
Control2	2019-12-17_20X_Control_Lung2.6_SOX9_HOPX_SFTPC_003-MaxIP	70	135.89	14.21
Control2	2019-12-17_20X_Control_Lung2.6_SOX9_HOPX_SFTPC_003-MaxIP	21	136.66	11.24
Control2	2019-12-17_20X_Control_Lung2.6_SOX9_HOPX_SFTPC_003-MaxIP	50	136.66	14.86
Control2	2019-12-17_20X_Control_Lung2.6_SOX9_HOPX_SFTPC_003-MaxIP	197	138.21	14.32
Control2	2019-12-17_20X_Control_Lung2.6_SOX9_HOPX_SFTPC_003-MaxIP	31	141.31	13.42
Control2	2019-12-17_20X_Control_Lung2.6_SOX9_HOPX_SFTPC_003-MaxIP	131	142.08	14.29
Control2	2019-12-17_20X_Control_Lung2.6_SOX9_HOPX_SFTPC_003-MaxIP	78	142.47	15.15
Control2	2019-12-17_20X_Control_Lung2.6_SOX9_HOPX_SFTPC_003-MaxIP	93	145.95	14.71
Control2	2019-12-17_20X_Control_Lung2.6_SOX9_HOPX_SFTPC_003-MaxIP	40	149.44	12.52
Control2	2019-12-17_20X_Control_Lung2.6_SOX9_HOPX_SFTPC_003-MaxIP	9	155.63	9.97
Control2	2019-12-17_20X_Control_Lung2.6_SOX9_HOPX_SFTPC_003-MaxIP	136	157.96	16.2
Control2	2019-12-17_20X_Control_Lung2.6_SOX9_HOPX_SFTPC_003-MaxIP	62	164.15	16.56
Control2	2019-12-17_20X_Control_Lung2.6_SOX9_HOPX_SFTPC_003-MaxIP	91	165.31	16.46
Control2	2019-12-17_20X_Control_Lung2.6_SOX9_HOPX_SFTPC_003-MaxIP	102	167.63	15.8
Control2	2019-12-17_20X_Control_Lung2.6_SOX9_HOPX_SFTPC_003-MaxIP	48	168.8	15.76
Control2	2019-12-17_20X_Control_Lung2.6_SOX9_HOPX_SFTPC_003-MaxIP	182	169.18	15.89
Control2	2019-12-17_20X_Control_Lung2.6_SOX9_HOPX_SFTPC_003-MaxIP	61	173.83	15.28
Control2	2019-12-17_20X_Control_Lung2.6_SOX9_HOPX_SFTPC_003-MaxIP	76	176.54	12.99
Control2	2019-12-17_20X_Control_Lung2.6_SOX9_HOPX_SFTPC_003-MaxIP	109	178.09	18.72
Control2	2019-12-17_20X_Control_Lung2.6_SOX9_HOPX_SFTPC_003-MaxIP	124	179.25	17.64
Control2	2019-12-17_20X_Control_Lung2.6_SOX9_HOPX_SFTPC_003-MaxIP	99	179.64	17.18
Control2	2019-12-17_20X_Control_Lung2.6_SOX9_HOPX_SFTPC_003-MaxIP	125	180.02	14.26
Control2	2019-12-17_20X_Control_Lung2.6_SOX9_HOPX_SFTPC_003-MaxIP	43	181.96	13.32
Control2	2019-12-17_20X_Control_Lung2.6_SOX9_HOPX_SFTPC_003-MaxIP	190	182.35	14.26
Control2	2019-12-17_20X_Control_Lung2.6_SOX9_HOPX_SFTPC_003-MaxIP	134	183.51	14.55
Control2	2019-12-17_20X_Control_Lung2.6_SOX9_HOPX_SFTPC_003-MaxIP	135	186.6	15.85
Control2	2019-12-17_20X_Control_Lung2.6_SOX9_HOPX_SFTPC_003-MaxIP	157	188.93	18.01
Control2	2019-12-17_20X_Control_Lung2.6_SOX9_HOPX_SFTPC_003-MaxIP	45	191.64	12.96
Control2	2019-12-17_20X_Control_Lung2.6_SOX9_HOPX_SFTPC_003-MaxIP	15	195.12	13.04
Control2	2019-12-17_20X_Control_Lung2.6_SOX9_HOPX_SFTPC_003-MaxIP	149	195.12	14.53
Control2	2019-12-17_20X_Control_Lung2.6_SOX9_HOPX_SFTPC_003-MaxIP	85	197.06	17.41
Control2	2019-12-17_20X_Control_Lung2.6_SOX9_HOPX_SFTPC_003-MaxIP	162	199.77	13.75
Control2	2019-12-17_20X_Control_Lung2.6_SOX9_HOPX_SFTPC_003-MaxIP	115	207.51	17.34
Control2	2019-12-17_20X_Control_Lung2.6_SOX9_HOPX_SFTPC_003-MaxIP	42	211	15.36
Control2	2019-12-17_20X_Control_Lung2.6_SOX9_HOPX_SFTPC_003-MaxIP	118	218.74	18.76
Control2	2019-12-17_20X_Control_Lung2.6_SOX9_HOPX_SFTPC_003-MaxIP	5	221.84	19.16
Control2	2019-12-17_20X_Control_Lung2.6_SOX9_HOPX_SFTPC_003-MaxIP	128	224.16	14.38
Control2	2019-12-17_20X_Control_Lung2.6_SOX9_HOPX_SFTPC_003-MaxIP	83	224.55	17.71
Control2	2019-12-17_20X_Control_Lung2.6_SOX9_HOPX_SFTPC_003-MaxIP	6	227.26	13.43
Control2	2019-12-17_20X_Control_Lung2.6_SOX9_HOPX_SFTPC_003-MaxIP	127	229.97	19.18
Control2	2019-12-17_20X_Control_Lung2.6_SOX9_HOPX_SFTPC_003-MaxIP	53	231.9	20.06
Control2	2019-12-17_20X_Control_Lung2.6_SOX9_HOPX_SFTPC_003-MaxIP	176	233.84	18.98
Control2	2019-12-17_20X_Control_Lung2.6_SOX9_HOPX_SFTPC_003-MaxIP	119	237.32	20.56
Control2	2019-12-17_20X_Control_Lung2.6_SOX9_HOPX_SFTPC_003-MaxIP	208	238.48	17.76
Control2	2019-12-17_20X_Control_Lung2.6_SOX9_HOPX_SFTPC_003-MaxIP	24	247	18.98
Control2	2019-12-17_20X_Control_Lung2.6_SOX9_HOPX_SFTPC_003-MaxIP	155	252.03	14.95
Control2	2019-12-17_20X_Control_Lung2.6_SOX9_HOPX_SFTPC_003-MaxIP	140	253.97	20.4
Control2	2019-12-17_20X_Control_Lung2.6_SOX9_HOPX_SFTPC_003-MaxIP	44	258.23	17.76
Control2	2019-12-17_20X_Control_Lung2.6_SOX9_HOPX_SFTPC_003-MaxIP	81	259.39	21.17
Control2	2019-12-17_20X_Control_Lung2.6_SOX9_HOPX_SFTPC_003-MaxIP	12	259.78	20.34
Control2	2019-12-17_20X_Control_Lung2.6_SOX9_HOPX_SFTPC_003-MaxIP	29	262.49	19.6
Control2	2019-12-17_20X_Control_Lung2.6_SOX9_HOPX_SFTPC_003-MaxIP	146	267.91	17.04
Control2	2019-12-17_20X_Control_Lung2.6_SOX9_HOPX_SFTPC_003-MaxIP	16	269.84	17.77
Control2	2019-12-17_20X_Control_Lung2.6_SOX9_HOPX_SFTPC_003-MaxIP	92	270.62	18.9
Control2	2019-12-17_20X_Control_Lung2.6_SOX9_HOPX_SFTPC_003-MaxIP	63	276.04	19.64
Control2	2019-12-17_20X_Control_Lung2.6_SOX9_HOPX_SFTPC_003-MaxIP	73	277.2	21.41
Control2	2019-12-17_20X_Control_Lung2.6_SOX9_HOPX_SFTPC_003-MaxIP	187	284.55	14.54
Control2	2019-12-17_20X_Control_Lung2.6_SOX9_HOPX_SFTPC_003-MaxIP	64	287.26	19.58
Control2	2019-12-17_20X_Control_Lung2.6_SOX9_HOPX_SFTPC_003-MaxIP	179	296.94	18.36
Control2	2019-12-17_20X_Control_Lung2.6_SOX9_HOPX_SFTPC_003-MaxIP	60	305.85	18.38
Control2	2019-12-17_20X_Control_Lung2.6_SOX9_HOPX_SFTPC_003-MaxIP	173	307.39	20.26
Control2	2019-12-17_20X_Control_Lung2.6_SOX9_HOPX_SFTPC_003-MaxIP	122	313.2	22.99
Control2	2019-12-17_20X_Control_Lung2.6_SOX9_HOPX_SFTPC_003-MaxIP	113	329.08	18.48
Control2	2019-12-17_20X_Control_Lung2.6_SOX9_HOPX_SFTPC_003-MaxIP	108	334.88	20.15
Control2	2019-12-17_20X_Control_Lung2.6_SOX9_HOPX_SFTPC_003-MaxIP	105	335.27	19.3
Control2	2019-12-17_20X_Control_Lung2.6_SOX9_HOPX_SFTPC_003-MaxIP	26	336.82	19.17
Control2	2019-12-17_20X_Control_Lung2.6_SOX9_HOPX_SFTPC_003-MaxIP	121	336.82	18.31
Control2	2019-12-17_20X_Control_Lung2.6_SOX9_HOPX_SFTPC_003-MaxIP	8	339.14	16.52
Control2	2019-12-17_20X_Control_Lung2.6_SOX9_HOPX_SFTPC_003-MaxIP	112	355.01	23.15
Control2	2019-12-17_20X_Control_Lung2.6_SOX9_HOPX_SFTPC_003-MaxIP	77	355.4	19.84
Control2	2019-12-17_20X_Control_Lung2.6_SOX9_HOPX_SFTPC_003-MaxIP	88	360.05	24.23
Control2	2019-12-17_20X_Control_Lung2.6_SOX9_HOPX_SFTPC_003-MaxIP	110	361.21	21.32
Control2	2019-12-17_20X_Control_Lung2.6_SOX9_HOPX_SFTPC_003-MaxIP	129	367.02	17.93
Control2	2019-12-17_20X_Control_Lung2.6_SOX9_HOPX_SFTPC_003-MaxIP	94	367.4	22.7
Control2	2019-12-17_20X_Control_Lung2.6_SOX9_HOPX_SFTPC_003-MaxIP	101	367.79	20.84
Control2	2019-12-17_20X_Control_Lung2.6_SOX9_HOPX_SFTPC_003-MaxIP	130	381.73	22.79
Control2	2019-12-17_20X_Control_Lung2.6_SOX9_HOPX_SFTPC_003-MaxIP	172	386.37	23.95
Control2	2019-12-17_20X_Control_Lung2.6_SOX9_HOPX_SFTPC_003-MaxIP	111	398.76	23.47
Control2	2019-12-17_20X_Control_Lung2.6_SOX9_HOPX_SFTPC_003-MaxIP	123	414.63	20.28
Control2	2019-12-17_20X_Control_Lung2.6_SOX9_HOPX_SFTPC_003-MaxIP	71	416.18	21.45
Control2	2019-12-17_20X_Control_Lung2.6_SOX9_HOPX_SFTPC_003-MaxIP	89	424.31	19.73
Control2	2019-12-17_20X_Control_Lung2.6_SOX9_HOPX_SFTPC_003-MaxIP	163	429.35	22.07
Control2	2019-12-17_20X_Control_Lung2.6_SOX9_HOPX_SFTPC_003-MaxIP	36	430.12	18.42
Control2	2019-12-17_20X_Control_Lung2.6_SOX9_HOPX_SFTPC_003-MaxIP	138	443.67	19.29
Control2	2019-12-17_20X_Control_Lung2.6_SOX9_HOPX_SFTPC_003-MaxIP	51	460.32	21.82
Control2	2019-12-17_20X_Control_Lung2.6_SOX9_HOPX_SFTPC_003-MaxIP	30	462.64	23.52
Control2	2019-12-17_20X_Control_Lung2.6_SOX9_HOPX_SFTPC_003-MaxIP	79	463.8	23.73
Control2	2019-12-17_20X_Control_Lung2.6_SOX9_HOPX_SFTPC_003-MaxIP	37	468.45	20.47
Control2	2019-12-17_20X_Control_Lung2.6_SOX9_HOPX_SFTPC_003-MaxIP	158	476.19	25.37
Control2	2019-12-17_20X_Control_Lung2.6_SOX9_HOPX_SFTPC_003-MaxIP	178	476.19	25.37
Control2	2019-12-17_20X_Control_Lung2.6_SOX9_HOPX_SFTPC_003-MaxIP	103	485.48	27.72
Control2	2019-12-17_20X_Control_Lung2.6_SOX9_HOPX_SFTPC_003-MaxIP	47	494	26.65
Control2	2019-12-17_20X_Control_Lung2.6_SOX9_HOPX_SFTPC_003-MaxIP	41	494.39	27.93
Control2	2019-12-17_20X_Control_Lung2.6_SOX9_HOPX_SFTPC_003-MaxIP	150	508.32	21.72
Control2	2019-12-17_20X_Control_Lung2.6_SOX9_HOPX_SFTPC_003-MaxIP	165	512.97	31.04
Control2	2019-12-17_20X_Control_Lung2.6_SOX9_HOPX_SFTPC_003-MaxIP	170	512.97	28.75
Control2	2019-12-17_20X_Control_Lung2.6_SOX9_HOPX_SFTPC_003-MaxIP	38	514.52	23.06
Control2	2019-12-17_20X_Control_Lung2.6_SOX9_HOPX_SFTPC_003-MaxIP	90	524.2	28
Control2	2019-12-17_20X_Control_Lung2.6_SOX9_HOPX_SFTPC_003-MaxIP	195	528.84	21.4
Control2	2019-12-17_20X_Control_Lung2.6_SOX9_HOPX_SFTPC_003-MaxIP	183	534.26	27.66
Control2	2019-12-17_20X_Control_Lung2.6_SOX9_HOPX_SFTPC_003-MaxIP	198	543.55	27.31
Control2	2019-12-17_20X_Control_Lung2.6_SOX9_HOPX_SFTPC_003-MaxIP	67	549.36	33.05
Control2	2019-12-17_20X_Control_Lung2.6_SOX9_HOPX_SFTPC_003-MaxIP	58	566.78	23.26
Control2	2019-12-17_20X_Control_Lung2.6_SOX9_HOPX_SFTPC_003-MaxIP	168	589.63	25.51
Control2	2019-12-17_20X_Control_Lung2.6_SOX9_HOPX_SFTPC_003-MaxIP	141	601.24	29.02
Control2	2019-12-17_20X_Control_Lung2.6_SOX9_HOPX_SFTPC_003-MaxIP	86	604.72	25.91
Control2	2019-12-17_20X_Control_Lung2.6_SOX9_HOPX_SFTPC_003-MaxIP	175	617.11	32.89
Control2	2019-12-17_20X_Control_Lung2.6_SOX9_HOPX_SFTPC_003-MaxIP	200	622.53	25.39
Control2	2019-12-17_20X_Control_Lung2.6_SOX9_HOPX_SFTPC_003-MaxIP	117	662.41	35.1
Control2	2019-12-17_20X_Control_Lung2.6_SOX9_HOPX_SFTPC_003-MaxIP	133	686.41	27.86
Control2	2019-12-17_20X_Control_Lung2.6_SOX9_HOPX_SFTPC_003-MaxIP	72	688.73	25.49
Control2	2019-12-17_20X_Control_Lung2.6_SOX9_HOPX_SFTPC_003-MaxIP	56	689.51	35.12
Control2	2019-12-17_20X_Control_Lung2.6_SOX9_HOPX_SFTPC_003-MaxIP	35	690.67	26.65
Control2	2019-12-17_20X_Control_Lung2.6_SOX9_HOPX_SFTPC_003-MaxIP	66	758.81	37.8
Control2	2019-12-17_20X_Control_Lung2.6_SOX9_HOPX_SFTPC_003-MaxIP	114	765.39	33.65
Control2	2019-12-17_20X_Control_Lung2.6_SOX9_HOPX_SFTPC_003-MaxIP	154	785.13	38.65
Control2	2019-12-17_20X_Control_Lung2.6_SOX9_HOPX_SFTPC_003-MaxIP	153	807.2	33.42
Control2	2019-12-17_20X_Control_Lung2.6_SOX9_HOPX_SFTPC_003-MaxIP	7	842.43	32.15
Control2	2019-12-17_20X_Control_Lung2.6_SOX9_HOPX_SFTPC_003-MaxIP	65	848.24	38.03
Control2	2019-12-17_20X_Control_Lung2.6_SOX9_HOPX_SFTPC_003-MaxIP	116	850.95	32.56
Control2	2019-12-17_20X_Control_Lung2.6_SOX9_HOPX_SFTPC_003-MaxIP	69	950.83	26.34
Control2	2019-12-17_20X_Control_Lung2.6_SOX9_HOPX_SFTPC_003-MaxIP	39	977.55	31.49
Control2	2019-12-17_20X_Control_Lung2.6_SOX9_HOPX_SFTPC_003-MaxIP	80	990.71	33.68
Control2	2019-12-17_20X_Control_Lung2.6_SOX9_HOPX_SFTPC_003-MaxIP	4	1021.29	36.34
Control2	2019-12-17_20X_Control_Lung2.6_SOX9_HOPX_SFTPC_003-MaxIP	96	1021.68	37.4
Control2	2019-12-17_20X_Control_Lung2.6_SOX9_HOPX_SFTPC_003-MaxIP	75	1029.42	44
Control2	2019-12-17_20X_Control_Lung2.6_SOX9_HOPX_SFTPC_003-MaxIP	68	1169.96	44.13
Control2	2019-12-17_20X_Control_Lung2.6_SOX9_HOPX_SFTPC_003-MaxIP	152	1179.25	35.8
Control2	2019-12-17_20X_Control_Lung2.6_SOX9_HOPX_SFTPC_003-MaxIP	52	1209.06	37.34
Control2	2019-12-17_20X_Control_Lung2.6_SOX9_HOPX_SFTPC_003-MaxIP	144	1285.33	43.73
Control2	2019-12-17_20X_Control_Lung2.6_SOX9_HOPX_SFTPC_003-MaxIP	84	1309.72	42.98
Control2	2019-12-17_20X_Control_Lung2.6_SOX9_HOPX_SFTPC_003-MaxIP	137	1358.11	35.5
Control2	2019-12-17_20X_Control_Lung2.6_SOX9_HOPX_SFTPC_003-MaxIP	148	1362.76	54.16
Control2	2019-12-17_20X_Control_Lung2.6_SOX9_HOPX_SFTPC_003-MaxIP	161	1509.1	43.45
Control2	2019-12-17_20X_Control_Lung2.6_SOX9_HOPX_SFTPC_003-MaxIP	171	1648.47	57.41
Control2	2019-12-17_20X_Control_Lung2.6_SOX9_HOPX_SFTPC_003-MaxIP	17	1714.68	57.17
Control2	2019-12-17_20X_Control_Lung2.6_SOX9_HOPX_SFTPC_003-MaxIP	203	1853.66	51.71
Control2	2019-12-17_20X_Control_Lung2.6_SOX9_HOPX_SFTPC_003-MaxIP	25	1901.28	56.12
Control2	2019-12-17_20X_Control_Lung2.6_SOX9_HOPX_SFTPC_003-MaxIP	191	1980.26	60.46
Control2	2019-12-17_20X_Control_Lung2.6_SOX9_HOPX_SFTPC_003-MaxIP	169	2480.07	78.53
IH4	2019-12-18_20X_Hypoxia_Lung4.6_SOX9_HOPX_SFTPC_001-MaxIP	124	50.33	9.25
IH4	2019-12-18_20X_Hypoxia_Lung4.6_SOX9_HOPX_SFTPC_001-MaxIP	167	50.72	8.05
IH4	2019-12-18_20X_Hypoxia_Lung4.6_SOX9_HOPX_SFTPC_001-MaxIP	35	53.04	9.05
IH4	2019-12-18_20X_Hypoxia_Lung4.6_SOX9_HOPX_SFTPC_001-MaxIP	140	53.04	9.45
IH4	2019-12-18_20X_Hypoxia_Lung4.6_SOX9_HOPX_SFTPC_001-MaxIP	145	53.04	8.73
IH4	2019-12-18_20X_Hypoxia_Lung4.6_SOX9_HOPX_SFTPC_001-MaxIP	99	54.2	8.72
IH4	2019-12-18_20X_Hypoxia_Lung4.6_SOX9_HOPX_SFTPC_001-MaxIP	114	57.68	6.06
IH4	2019-12-18_20X_Hypoxia_Lung4.6_SOX9_HOPX_SFTPC_001-MaxIP	90	67.36	6.54
IH4	2019-12-18_20X_Hypoxia_Lung4.6_SOX9_HOPX_SFTPC_001-MaxIP	146	68.91	7.9
IH4	2019-12-18_20X_Hypoxia_Lung4.6_SOX9_HOPX_SFTPC_001-MaxIP	132	70.46	7.55
IH4	2019-12-18_20X_Hypoxia_Lung4.6_SOX9_HOPX_SFTPC_001-MaxIP	92	73.56	7.87
IH4	2019-12-18_20X_Hypoxia_Lung4.6_SOX9_HOPX_SFTPC_001-MaxIP	95	76.27	12.75
IH4	2019-12-18_20X_Hypoxia_Lung4.6_SOX9_HOPX_SFTPC_001-MaxIP	147	77.82	7.05
IH4	2019-12-18_20X_Hypoxia_Lung4.6_SOX9_HOPX_SFTPC_001-MaxIP	116	78.2	11.44
IH4	2019-12-18_20X_Hypoxia_Lung4.6_SOX9_HOPX_SFTPC_001-MaxIP	62	78.59	9.49
IH4	2019-12-18_20X_Hypoxia_Lung4.6_SOX9_HOPX_SFTPC_001-MaxIP	137	79.37	9.21
IH4	2019-12-18_20X_Hypoxia_Lung4.6_SOX9_HOPX_SFTPC_001-MaxIP	123	81.69	6.97
IH4	2019-12-18_20X_Hypoxia_Lung4.6_SOX9_HOPX_SFTPC_001-MaxIP	151	82.08	9.67
IH4	2019-12-18_20X_Hypoxia_Lung4.6_SOX9_HOPX_SFTPC_001-MaxIP	30	82.46	10.54
IH4	2019-12-18_20X_Hypoxia_Lung4.6_SOX9_HOPX_SFTPC_001-MaxIP	49	82.85	8.42
IH4	2019-12-18_20X_Hypoxia_Lung4.6_SOX9_HOPX_SFTPC_001-MaxIP	42	85.17	9.26
IH4	2019-12-18_20X_Hypoxia_Lung4.6_SOX9_HOPX_SFTPC_001-MaxIP	103	87.5	10.77
IH4	2019-12-18_20X_Hypoxia_Lung4.6_SOX9_HOPX_SFTPC_001-MaxIP	14	88.66	8.32
IH4	2019-12-18_20X_Hypoxia_Lung4.6_SOX9_HOPX_SFTPC_001-MaxIP	104	91.75	9.34
IH4	2019-12-18_20X_Hypoxia_Lung4.6_SOX9_HOPX_SFTPC_001-MaxIP	130	92.14	10.22
IH4	2019-12-18_20X_Hypoxia_Lung4.6_SOX9_HOPX_SFTPC_001-MaxIP	46	92.92	7.19
IH4	2019-12-18_20X_Hypoxia_Lung4.6_SOX9_HOPX_SFTPC_001-MaxIP	43	94.46	9.86
IH4	2019-12-18_20X_Hypoxia_Lung4.6_SOX9_HOPX_SFTPC_001-MaxIP	55	95.63	11.97
IH4	2019-12-18_20X_Hypoxia_Lung4.6_SOX9_HOPX_SFTPC_001-MaxIP	87	96.4	8.44
IH4	2019-12-18_20X_Hypoxia_Lung4.6_SOX9_HOPX_SFTPC_001-MaxIP	138	97.95	8.75
IH4	2019-12-18_20X_Hypoxia_Lung4.6_SOX9_HOPX_SFTPC_001-MaxIP	45	99.88	12.32
IH4	2019-12-18_20X_Hypoxia_Lung4.6_SOX9_HOPX_SFTPC_001-MaxIP	156	101.43	8.48
IH4	2019-12-18_20X_Hypoxia_Lung4.6_SOX9_HOPX_SFTPC_001-MaxIP	110	102.21	8.92
IH4	2019-12-18_20X_Hypoxia_Lung4.6_SOX9_HOPX_SFTPC_001-MaxIP	155	105.69	9.77
IH4	2019-12-18_20X_Hypoxia_Lung4.6_SOX9_HOPX_SFTPC_001-MaxIP	166	106.08	8.99
IH4	2019-12-18_20X_Hypoxia_Lung4.6_SOX9_HOPX_SFTPC_001-MaxIP	152	113.43	10.4
IH4	2019-12-18_20X_Hypoxia_Lung4.6_SOX9_HOPX_SFTPC_001-MaxIP	50	114.21	8.77
IH4	2019-12-18_20X_Hypoxia_Lung4.6_SOX9_HOPX_SFTPC_001-MaxIP	1	115.76	13.06
IH4	2019-12-18_20X_Hypoxia_Lung4.6_SOX9_HOPX_SFTPC_001-MaxIP	98	116.14	10.18
IH4	2019-12-18_20X_Hypoxia_Lung4.6_SOX9_HOPX_SFTPC_001-MaxIP	159	116.14	9.79
IH4	2019-12-18_20X_Hypoxia_Lung4.6_SOX9_HOPX_SFTPC_001-MaxIP	164	117.31	11.73
IH4	2019-12-18_20X_Hypoxia_Lung4.6_SOX9_HOPX_SFTPC_001-MaxIP	5	118.85	10.41
IH4	2019-12-18_20X_Hypoxia_Lung4.6_SOX9_HOPX_SFTPC_001-MaxIP	157	119.24	12.29
IH4	2019-12-18_20X_Hypoxia_Lung4.6_SOX9_HOPX_SFTPC_001-MaxIP	150	120.02	13.96
IH4	2019-12-18_20X_Hypoxia_Lung4.6_SOX9_HOPX_SFTPC_001-MaxIP	91	121.18	13.87
IH4	2019-12-18_20X_Hypoxia_Lung4.6_SOX9_HOPX_SFTPC_001-MaxIP	122	128.15	13.31
IH4	2019-12-18_20X_Hypoxia_Lung4.6_SOX9_HOPX_SFTPC_001-MaxIP	142	130.08	13.06
IH4	2019-12-18_20X_Hypoxia_Lung4.6_SOX9_HOPX_SFTPC_001-MaxIP	66	131.24	13.62
IH4	2019-12-18_20X_Hypoxia_Lung4.6_SOX9_HOPX_SFTPC_001-MaxIP	129	132.02	13.5
IH4	2019-12-18_20X_Hypoxia_Lung4.6_SOX9_HOPX_SFTPC_001-MaxIP	162	132.79	9.72
IH4	2019-12-18_20X_Hypoxia_Lung4.6_SOX9_HOPX_SFTPC_001-MaxIP	74	150.6	15.95
IH4	2019-12-18_20X_Hypoxia_Lung4.6_SOX9_HOPX_SFTPC_001-MaxIP	77	154.08	13.42
IH4	2019-12-18_20X_Hypoxia_Lung4.6_SOX9_HOPX_SFTPC_001-MaxIP	111	155.25	13.01
IH4	2019-12-18_20X_Hypoxia_Lung4.6_SOX9_HOPX_SFTPC_001-MaxIP	48	155.63	11.39
IH4	2019-12-18_20X_Hypoxia_Lung4.6_SOX9_HOPX_SFTPC_001-MaxIP	72	157.57	16.39
IH4	2019-12-18_20X_Hypoxia_Lung4.6_SOX9_HOPX_SFTPC_001-MaxIP	121	159.89	13.25
IH4	2019-12-18_20X_Hypoxia_Lung4.6_SOX9_HOPX_SFTPC_001-MaxIP	153	161.83	9.71
IH4	2019-12-18_20X_Hypoxia_Lung4.6_SOX9_HOPX_SFTPC_001-MaxIP	79	164.92	16.73
IH4	2019-12-18_20X_Hypoxia_Lung4.6_SOX9_HOPX_SFTPC_001-MaxIP	20	166.47	15.92
IH4	2019-12-18_20X_Hypoxia_Lung4.6_SOX9_HOPX_SFTPC_001-MaxIP	88	166.86	12.64
IH4	2019-12-18_20X_Hypoxia_Lung4.6_SOX9_HOPX_SFTPC_001-MaxIP	59	173.44	12.32
IH4	2019-12-18_20X_Hypoxia_Lung4.6_SOX9_HOPX_SFTPC_001-MaxIP	56	175.76	15.4
IH4	2019-12-18_20X_Hypoxia_Lung4.6_SOX9_HOPX_SFTPC_001-MaxIP	4	177.7	15.36
IH4	2019-12-18_20X_Hypoxia_Lung4.6_SOX9_HOPX_SFTPC_001-MaxIP	36	178.47	15.63
IH4	2019-12-18_20X_Hypoxia_Lung4.6_SOX9_HOPX_SFTPC_001-MaxIP	21	180.8	16.16
IH4	2019-12-18_20X_Hypoxia_Lung4.6_SOX9_HOPX_SFTPC_001-MaxIP	63	190.48	12.21
IH4	2019-12-18_20X_Hypoxia_Lung4.6_SOX9_HOPX_SFTPC_001-MaxIP	3	192.8	21.59
IH4	2019-12-18_20X_Hypoxia_Lung4.6_SOX9_HOPX_SFTPC_001-MaxIP	102	200.54	13.8
IH4	2019-12-18_20X_Hypoxia_Lung4.6_SOX9_HOPX_SFTPC_001-MaxIP	51	201.32	17.6
IH4	2019-12-18_20X_Hypoxia_Lung4.6_SOX9_HOPX_SFTPC_001-MaxIP	54	207.9	15.36
IH4	2019-12-18_20X_Hypoxia_Lung4.6_SOX9_HOPX_SFTPC_001-MaxIP	26	221.06	13.43
IH4	2019-12-18_20X_Hypoxia_Lung4.6_SOX9_HOPX_SFTPC_001-MaxIP	83	222.61	14.3
IH4	2019-12-18_20X_Hypoxia_Lung4.6_SOX9_HOPX_SFTPC_001-MaxIP	67	224.55	17.57
IH4	2019-12-18_20X_Hypoxia_Lung4.6_SOX9_HOPX_SFTPC_001-MaxIP	141	231.9	15.73
IH4	2019-12-18_20X_Hypoxia_Lung4.6_SOX9_HOPX_SFTPC_001-MaxIP	115	235.77	16.41
IH4	2019-12-18_20X_Hypoxia_Lung4.6_SOX9_HOPX_SFTPC_001-MaxIP	13	240.42	16.09
IH4	2019-12-18_20X_Hypoxia_Lung4.6_SOX9_HOPX_SFTPC_001-MaxIP	9	251.65	11.07
IH4	2019-12-18_20X_Hypoxia_Lung4.6_SOX9_HOPX_SFTPC_001-MaxIP	144	252.03	20.36
IH4	2019-12-18_20X_Hypoxia_Lung4.6_SOX9_HOPX_SFTPC_001-MaxIP	23	252.81	16.23
IH4	2019-12-18_20X_Hypoxia_Lung4.6_SOX9_HOPX_SFTPC_001-MaxIP	27	259.39	17.37
IH4	2019-12-18_20X_Hypoxia_Lung4.6_SOX9_HOPX_SFTPC_001-MaxIP	75	260.94	16.89
IH4	2019-12-18_20X_Hypoxia_Lung4.6_SOX9_HOPX_SFTPC_001-MaxIP	154	261.32	18.79
IH4	2019-12-18_20X_Hypoxia_Lung4.6_SOX9_HOPX_SFTPC_001-MaxIP	28	275.65	18.08
IH4	2019-12-18_20X_Hypoxia_Lung4.6_SOX9_HOPX_SFTPC_001-MaxIP	109	279.52	17.46
IH4	2019-12-18_20X_Hypoxia_Lung4.6_SOX9_HOPX_SFTPC_001-MaxIP	126	281.07	17.45
IH4	2019-12-18_20X_Hypoxia_Lung4.6_SOX9_HOPX_SFTPC_001-MaxIP	136	281.84	17.86
IH4	2019-12-18_20X_Hypoxia_Lung4.6_SOX9_HOPX_SFTPC_001-MaxIP	10	282.23	15.54
IH4	2019-12-18_20X_Hypoxia_Lung4.6_SOX9_HOPX_SFTPC_001-MaxIP	76	288.81	19.07
IH4	2019-12-18_20X_Hypoxia_Lung4.6_SOX9_HOPX_SFTPC_001-MaxIP	97	289.97	17.37
IH4	2019-12-18_20X_Hypoxia_Lung4.6_SOX9_HOPX_SFTPC_001-MaxIP	58	299.26	18.36
IH4	2019-12-18_20X_Hypoxia_Lung4.6_SOX9_HOPX_SFTPC_001-MaxIP	6	300.43	21.35
IH4	2019-12-18_20X_Hypoxia_Lung4.6_SOX9_HOPX_SFTPC_001-MaxIP	12	305.07	18.54
IH4	2019-12-18_20X_Hypoxia_Lung4.6_SOX9_HOPX_SFTPC_001-MaxIP	143	305.07	19.97
IH4	2019-12-18_20X_Hypoxia_Lung4.6_SOX9_HOPX_SFTPC_001-MaxIP	105	308.56	24.36
IH4	2019-12-18_20X_Hypoxia_Lung4.6_SOX9_HOPX_SFTPC_001-MaxIP	57	320.17	21.04
IH4	2019-12-18_20X_Hypoxia_Lung4.6_SOX9_HOPX_SFTPC_001-MaxIP	108	326.37	18.71
IH4	2019-12-18_20X_Hypoxia_Lung4.6_SOX9_HOPX_SFTPC_001-MaxIP	69	327.14	20.69
IH4	2019-12-18_20X_Hypoxia_Lung4.6_SOX9_HOPX_SFTPC_001-MaxIP	131	336.82	25.82
IH4	2019-12-18_20X_Hypoxia_Lung4.6_SOX9_HOPX_SFTPC_001-MaxIP	29	338.37	22.21
IH4	2019-12-18_20X_Hypoxia_Lung4.6_SOX9_HOPX_SFTPC_001-MaxIP	7	341.08	19.12
IH4	2019-12-18_20X_Hypoxia_Lung4.6_SOX9_HOPX_SFTPC_001-MaxIP	93	354.63	22.2
IH4	2019-12-18_20X_Hypoxia_Lung4.6_SOX9_HOPX_SFTPC_001-MaxIP	89	355.79	21.98
IH4	2019-12-18_20X_Hypoxia_Lung4.6_SOX9_HOPX_SFTPC_001-MaxIP	106	357.72	21.17
IH4	2019-12-18_20X_Hypoxia_Lung4.6_SOX9_HOPX_SFTPC_001-MaxIP	25	358.5	22.83
IH4	2019-12-18_20X_Hypoxia_Lung4.6_SOX9_HOPX_SFTPC_001-MaxIP	33	376.69	22.55
IH4	2019-12-18_20X_Hypoxia_Lung4.6_SOX9_HOPX_SFTPC_001-MaxIP	19	392.57	25.17
IH4	2019-12-18_20X_Hypoxia_Lung4.6_SOX9_HOPX_SFTPC_001-MaxIP	68	404.57	23.96
IH4	2019-12-18_20X_Hypoxia_Lung4.6_SOX9_HOPX_SFTPC_001-MaxIP	158	416.18	19.06
IH4	2019-12-18_20X_Hypoxia_Lung4.6_SOX9_HOPX_SFTPC_001-MaxIP	16	419.28	20.4
IH4	2019-12-18_20X_Hypoxia_Lung4.6_SOX9_HOPX_SFTPC_001-MaxIP	118	430.12	26.17
IH4	2019-12-18_20X_Hypoxia_Lung4.6_SOX9_HOPX_SFTPC_001-MaxIP	149	431.67	21.94
IH4	2019-12-18_20X_Hypoxia_Lung4.6_SOX9_HOPX_SFTPC_001-MaxIP	52	432.06	22.02
IH4	2019-12-18_20X_Hypoxia_Lung4.6_SOX9_HOPX_SFTPC_001-MaxIP	24	435.93	24.25
IH4	2019-12-18_20X_Hypoxia_Lung4.6_SOX9_HOPX_SFTPC_001-MaxIP	128	445.22	25.24
IH4	2019-12-18_20X_Hypoxia_Lung4.6_SOX9_HOPX_SFTPC_001-MaxIP	96	454.9	20.99
IH4	2019-12-18_20X_Hypoxia_Lung4.6_SOX9_HOPX_SFTPC_001-MaxIP	41	456.06	17.32
IH4	2019-12-18_20X_Hypoxia_Lung4.6_SOX9_HOPX_SFTPC_001-MaxIP	107	470	29.28
IH4	2019-12-18_20X_Hypoxia_Lung4.6_SOX9_HOPX_SFTPC_001-MaxIP	80	477.35	21.7
IH4	2019-12-18_20X_Hypoxia_Lung4.6_SOX9_HOPX_SFTPC_001-MaxIP	38	480.84	28.41
IH4	2019-12-18_20X_Hypoxia_Lung4.6_SOX9_HOPX_SFTPC_001-MaxIP	100	482.77	22.46
IH4	2019-12-18_20X_Hypoxia_Lung4.6_SOX9_HOPX_SFTPC_001-MaxIP	34	487.81	20.03
IH4	2019-12-18_20X_Hypoxia_Lung4.6_SOX9_HOPX_SFTPC_001-MaxIP	165	507.16	29.09
IH4	2019-12-18_20X_Hypoxia_Lung4.6_SOX9_HOPX_SFTPC_001-MaxIP	117	510.65	20.88
IH4	2019-12-18_20X_Hypoxia_Lung4.6_SOX9_HOPX_SFTPC_001-MaxIP	82	513.36	25.26
IH4	2019-12-18_20X_Hypoxia_Lung4.6_SOX9_HOPX_SFTPC_001-MaxIP	2	536.97	20.86
IH4	2019-12-18_20X_Hypoxia_Lung4.6_SOX9_HOPX_SFTPC_001-MaxIP	60	538.52	24.55
IH4	2019-12-18_20X_Hypoxia_Lung4.6_SOX9_HOPX_SFTPC_001-MaxIP	113	540.46	29.58
IH4	2019-12-18_20X_Hypoxia_Lung4.6_SOX9_HOPX_SFTPC_001-MaxIP	94	543.17	23.99
IH4	2019-12-18_20X_Hypoxia_Lung4.6_SOX9_HOPX_SFTPC_001-MaxIP	134	552.46	23.95
IH4	2019-12-18_20X_Hypoxia_Lung4.6_SOX9_HOPX_SFTPC_001-MaxIP	70	557.49	25.83
IH4	2019-12-18_20X_Hypoxia_Lung4.6_SOX9_HOPX_SFTPC_001-MaxIP	64	561.36	26.48
IH4	2019-12-18_20X_Hypoxia_Lung4.6_SOX9_HOPX_SFTPC_001-MaxIP	40	562.52	22.39
IH4	2019-12-18_20X_Hypoxia_Lung4.6_SOX9_HOPX_SFTPC_001-MaxIP	135	575.3	25.16
IH4	2019-12-18_20X_Hypoxia_Lung4.6_SOX9_HOPX_SFTPC_001-MaxIP	71	581.5	28.17
IH4	2019-12-18_20X_Hypoxia_Lung4.6_SOX9_HOPX_SFTPC_001-MaxIP	78	590.01	29.3
IH4	2019-12-18_20X_Hypoxia_Lung4.6_SOX9_HOPX_SFTPC_001-MaxIP	101	596.21	32.25
IH4	2019-12-18_20X_Hypoxia_Lung4.6_SOX9_HOPX_SFTPC_001-MaxIP	163	597.76	31.29
IH4	2019-12-18_20X_Hypoxia_Lung4.6_SOX9_HOPX_SFTPC_001-MaxIP	85	608.21	31.18
IH4	2019-12-18_20X_Hypoxia_Lung4.6_SOX9_HOPX_SFTPC_001-MaxIP	44	637.24	29.31
IH4	2019-12-18_20X_Hypoxia_Lung4.6_SOX9_HOPX_SFTPC_001-MaxIP	65	655.83	22.76
IH4	2019-12-18_20X_Hypoxia_Lung4.6_SOX9_HOPX_SFTPC_001-MaxIP	61	656.99	30.89
IH4	2019-12-18_20X_Hypoxia_Lung4.6_SOX9_HOPX_SFTPC_001-MaxIP	112	667.83	26.52
IH4	2019-12-18_20X_Hypoxia_Lung4.6_SOX9_HOPX_SFTPC_001-MaxIP	133	672.86	29.55
IH4	2019-12-18_20X_Hypoxia_Lung4.6_SOX9_HOPX_SFTPC_001-MaxIP	47	684.09	33.96
IH4	2019-12-18_20X_Hypoxia_Lung4.6_SOX9_HOPX_SFTPC_001-MaxIP	148	688.73	28.08
IH4	2019-12-18_20X_Hypoxia_Lung4.6_SOX9_HOPX_SFTPC_001-MaxIP	17	701.9	35.49
IH4	2019-12-18_20X_Hypoxia_Lung4.6_SOX9_HOPX_SFTPC_001-MaxIP	39	707.71	32.67
IH4	2019-12-18_20X_Hypoxia_Lung4.6_SOX9_HOPX_SFTPC_001-MaxIP	73	708.87	30.61
IH4	2019-12-18_20X_Hypoxia_Lung4.6_SOX9_HOPX_SFTPC_001-MaxIP	18	717.77	35.24
IH4	2019-12-18_20X_Hypoxia_Lung4.6_SOX9_HOPX_SFTPC_001-MaxIP	22	737.13	29.81
IH4	2019-12-18_20X_Hypoxia_Lung4.6_SOX9_HOPX_SFTPC_001-MaxIP	120	743.71	29.7
IH4	2019-12-18_20X_Hypoxia_Lung4.6_SOX9_HOPX_SFTPC_001-MaxIP	15	747.19	21.69
IH4	2019-12-18_20X_Hypoxia_Lung4.6_SOX9_HOPX_SFTPC_001-MaxIP	32	747.58	32.3
IH4	2019-12-18_20X_Hypoxia_Lung4.6_SOX9_HOPX_SFTPC_001-MaxIP	161	791.33	34.88
IH4	2019-12-18_20X_Hypoxia_Lung4.6_SOX9_HOPX_SFTPC_001-MaxIP	31	791.72	30.08
IH4	2019-12-18_20X_Hypoxia_Lung4.6_SOX9_HOPX_SFTPC_001-MaxIP	160	834.3	35.53
IH4	2019-12-18_20X_Hypoxia_Lung4.6_SOX9_HOPX_SFTPC_001-MaxIP	125	878.82	40.16
IH4	2019-12-18_20X_Hypoxia_Lung4.6_SOX9_HOPX_SFTPC_001-MaxIP	37	940.38	32.49
IH4	2019-12-18_20X_Hypoxia_Lung4.6_SOX9_HOPX_SFTPC_001-MaxIP	86	999.23	31.82
IH4	2019-12-18_20X_Hypoxia_Lung4.6_SOX9_HOPX_SFTPC_001-MaxIP	53	1038.72	40.57
IH4	2019-12-18_20X_Hypoxia_Lung4.6_SOX9_HOPX_SFTPC_001-MaxIP	84	1058.46	29.82
IH4	2019-12-18_20X_Hypoxia_Lung4.6_SOX9_HOPX_SFTPC_001-MaxIP	119	1121.57	37.36
IH4	2019-12-18_20X_Hypoxia_Lung4.6_SOX9_HOPX_SFTPC_001-MaxIP	8	1136.28	45.41
IH4	2019-12-18_20X_Hypoxia_Lung4.6_SOX9_HOPX_SFTPC_001-MaxIP	81	1174.6	34.97
IH4	2019-12-18_20X_Hypoxia_Lung4.6_SOX9_HOPX_SFTPC_001-MaxIP	139	1205.58	39.99
IH4	2019-12-18_20X_Hypoxia_Lung4.6_SOX9_HOPX_SFTPC_001-MaxIP	127	1223	42.5
IH4	2019-12-18_20X_Hypoxia_Lung4.6_SOX9_HOPX_SFTPC_001-MaxIP	11	1360.44	21.39
IH4	2019-12-18_20X_Hypoxia_Lung4.6_SOX9_HOPX_SFTPC_002-MaxIP	132	53.04	7.01
IH4	2019-12-18_20X_Hypoxia_Lung4.6_SOX9_HOPX_SFTPC_002-MaxIP	137	54.2	8.8
IH4	2019-12-18_20X_Hypoxia_Lung4.6_SOX9_HOPX_SFTPC_002-MaxIP	57	56.14	9.26
IH4	2019-12-18_20X_Hypoxia_Lung4.6_SOX9_HOPX_SFTPC_002-MaxIP	35	59.62	8.47
IH4	2019-12-18_20X_Hypoxia_Lung4.6_SOX9_HOPX_SFTPC_002-MaxIP	29	61.17	7.18
IH4	2019-12-18_20X_Hypoxia_Lung4.6_SOX9_HOPX_SFTPC_002-MaxIP	22	61.94	9.26
IH4	2019-12-18_20X_Hypoxia_Lung4.6_SOX9_HOPX_SFTPC_002-MaxIP	63	62.72	8.37
IH4	2019-12-18_20X_Hypoxia_Lung4.6_SOX9_HOPX_SFTPC_002-MaxIP	30	65.04	9.6
IH4	2019-12-18_20X_Hypoxia_Lung4.6_SOX9_HOPX_SFTPC_002-MaxIP	89	69.3	9.74
IH4	2019-12-18_20X_Hypoxia_Lung4.6_SOX9_HOPX_SFTPC_002-MaxIP	23	71.62	6.68
IH4	2019-12-18_20X_Hypoxia_Lung4.6_SOX9_HOPX_SFTPC_002-MaxIP	61	72.01	11.22
IH4	2019-12-18_20X_Hypoxia_Lung4.6_SOX9_HOPX_SFTPC_002-MaxIP	14	72.4	8.33
IH4	2019-12-18_20X_Hypoxia_Lung4.6_SOX9_HOPX_SFTPC_002-MaxIP	36	75.49	9.46
IH4	2019-12-18_20X_Hypoxia_Lung4.6_SOX9_HOPX_SFTPC_002-MaxIP	58	84.79	11.21
IH4	2019-12-18_20X_Hypoxia_Lung4.6_SOX9_HOPX_SFTPC_002-MaxIP	50	89.43	12.65
IH4	2019-12-18_20X_Hypoxia_Lung4.6_SOX9_HOPX_SFTPC_002-MaxIP	99	89.82	10.74
IH4	2019-12-18_20X_Hypoxia_Lung4.6_SOX9_HOPX_SFTPC_002-MaxIP	110	90.59	9.68
IH4	2019-12-18_20X_Hypoxia_Lung4.6_SOX9_HOPX_SFTPC_002-MaxIP	93	90.98	12.29
IH4	2019-12-18_20X_Hypoxia_Lung4.6_SOX9_HOPX_SFTPC_002-MaxIP	78	92.92	9.24
IH4	2019-12-18_20X_Hypoxia_Lung4.6_SOX9_HOPX_SFTPC_002-MaxIP	139	94.08	9.71
IH4	2019-12-18_20X_Hypoxia_Lung4.6_SOX9_HOPX_SFTPC_002-MaxIP	7	94.85	10.51
IH4	2019-12-18_20X_Hypoxia_Lung4.6_SOX9_HOPX_SFTPC_002-MaxIP	12	99.5	10.44
IH4	2019-12-18_20X_Hypoxia_Lung4.6_SOX9_HOPX_SFTPC_002-MaxIP	105	101.05	10.11
IH4	2019-12-18_20X_Hypoxia_Lung4.6_SOX9_HOPX_SFTPC_002-MaxIP	124	101.05	12.72
IH4	2019-12-18_20X_Hypoxia_Lung4.6_SOX9_HOPX_SFTPC_002-MaxIP	82	107.63	13.8
IH4	2019-12-18_20X_Hypoxia_Lung4.6_SOX9_HOPX_SFTPC_002-MaxIP	79	108.4	12.96
IH4	2019-12-18_20X_Hypoxia_Lung4.6_SOX9_HOPX_SFTPC_002-MaxIP	38	108.79	9.61
IH4	2019-12-18_20X_Hypoxia_Lung4.6_SOX9_HOPX_SFTPC_002-MaxIP	108	115.37	11.7
IH4	2019-12-18_20X_Hypoxia_Lung4.6_SOX9_HOPX_SFTPC_002-MaxIP	75	115.76	13.25
IH4	2019-12-18_20X_Hypoxia_Lung4.6_SOX9_HOPX_SFTPC_002-MaxIP	26	121.56	9
IH4	2019-12-18_20X_Hypoxia_Lung4.6_SOX9_HOPX_SFTPC_002-MaxIP	121	121.56	11.62
IH4	2019-12-18_20X_Hypoxia_Lung4.6_SOX9_HOPX_SFTPC_002-MaxIP	53	124.27	13.21
IH4	2019-12-18_20X_Hypoxia_Lung4.6_SOX9_HOPX_SFTPC_002-MaxIP	138	125.44	15.69
IH4	2019-12-18_20X_Hypoxia_Lung4.6_SOX9_HOPX_SFTPC_002-MaxIP	25	127.76	10.13
IH4	2019-12-18_20X_Hypoxia_Lung4.6_SOX9_HOPX_SFTPC_002-MaxIP	64	135.5	12.85
IH4	2019-12-18_20X_Hypoxia_Lung4.6_SOX9_HOPX_SFTPC_002-MaxIP	133	135.89	13.96
IH4	2019-12-18_20X_Hypoxia_Lung4.6_SOX9_HOPX_SFTPC_002-MaxIP	6	139.76	9.28
IH4	2019-12-18_20X_Hypoxia_Lung4.6_SOX9_HOPX_SFTPC_002-MaxIP	56	140.15	13.6
IH4	2019-12-18_20X_Hypoxia_Lung4.6_SOX9_HOPX_SFTPC_002-MaxIP	111	140.53	8.9
IH4	2019-12-18_20X_Hypoxia_Lung4.6_SOX9_HOPX_SFTPC_002-MaxIP	87	148.28	14.21
IH4	2019-12-18_20X_Hypoxia_Lung4.6_SOX9_HOPX_SFTPC_002-MaxIP	9	150.21	10.81
IH4	2019-12-18_20X_Hypoxia_Lung4.6_SOX9_HOPX_SFTPC_002-MaxIP	120	150.21	10.79
IH4	2019-12-18_20X_Hypoxia_Lung4.6_SOX9_HOPX_SFTPC_002-MaxIP	85	157.18	14.83
IH4	2019-12-18_20X_Hypoxia_Lung4.6_SOX9_HOPX_SFTPC_002-MaxIP	92	157.96	16.3
IH4	2019-12-18_20X_Hypoxia_Lung4.6_SOX9_HOPX_SFTPC_002-MaxIP	24	161.05	13.68
IH4	2019-12-18_20X_Hypoxia_Lung4.6_SOX9_HOPX_SFTPC_002-MaxIP	127	162.99	14.34
IH4	2019-12-18_20X_Hypoxia_Lung4.6_SOX9_HOPX_SFTPC_002-MaxIP	107	166.09	12.99
IH4	2019-12-18_20X_Hypoxia_Lung4.6_SOX9_HOPX_SFTPC_002-MaxIP	16	170.34	15.15
IH4	2019-12-18_20X_Hypoxia_Lung4.6_SOX9_HOPX_SFTPC_002-MaxIP	109	184.28	16.23
IH4	2019-12-18_20X_Hypoxia_Lung4.6_SOX9_HOPX_SFTPC_002-MaxIP	74	198.61	15.37
IH4	2019-12-18_20X_Hypoxia_Lung4.6_SOX9_HOPX_SFTPC_002-MaxIP	126	203.64	13.95
IH4	2019-12-18_20X_Hypoxia_Lung4.6_SOX9_HOPX_SFTPC_002-MaxIP	33	219.9	12.75
IH4	2019-12-18_20X_Hypoxia_Lung4.6_SOX9_HOPX_SFTPC_002-MaxIP	125	222.61	17.4
IH4	2019-12-18_20X_Hypoxia_Lung4.6_SOX9_HOPX_SFTPC_002-MaxIP	59	223.38	15.24
IH4	2019-12-18_20X_Hypoxia_Lung4.6_SOX9_HOPX_SFTPC_002-MaxIP	84	232.68	18.92
IH4	2019-12-18_20X_Hypoxia_Lung4.6_SOX9_HOPX_SFTPC_002-MaxIP	97	243.52	17.23
IH4	2019-12-18_20X_Hypoxia_Lung4.6_SOX9_HOPX_SFTPC_002-MaxIP	20	247.77	16.67
IH4	2019-12-18_20X_Hypoxia_Lung4.6_SOX9_HOPX_SFTPC_002-MaxIP	60	251.65	20.4
IH4	2019-12-18_20X_Hypoxia_Lung4.6_SOX9_HOPX_SFTPC_002-MaxIP	1	253.97	18.97
IH4	2019-12-18_20X_Hypoxia_Lung4.6_SOX9_HOPX_SFTPC_002-MaxIP	44	270.62	22.8
IH4	2019-12-18_20X_Hypoxia_Lung4.6_SOX9_HOPX_SFTPC_002-MaxIP	135	272.55	17.25
IH4	2019-12-18_20X_Hypoxia_Lung4.6_SOX9_HOPX_SFTPC_002-MaxIP	28	279.13	21.02
IH4	2019-12-18_20X_Hypoxia_Lung4.6_SOX9_HOPX_SFTPC_002-MaxIP	114	280.68	14.08
IH4	2019-12-18_20X_Hypoxia_Lung4.6_SOX9_HOPX_SFTPC_002-MaxIP	13	300.43	19.97
IH4	2019-12-18_20X_Hypoxia_Lung4.6_SOX9_HOPX_SFTPC_002-MaxIP	116	310.1	18.91
IH4	2019-12-18_20X_Hypoxia_Lung4.6_SOX9_HOPX_SFTPC_002-MaxIP	106	324.04	19.12
IH4	2019-12-18_20X_Hypoxia_Lung4.6_SOX9_HOPX_SFTPC_002-MaxIP	37	328.69	17.52
IH4	2019-12-18_20X_Hypoxia_Lung4.6_SOX9_HOPX_SFTPC_002-MaxIP	104	345.72	20.83
IH4	2019-12-18_20X_Hypoxia_Lung4.6_SOX9_HOPX_SFTPC_002-MaxIP	34	353.08	24.79
IH4	2019-12-18_20X_Hypoxia_Lung4.6_SOX9_HOPX_SFTPC_002-MaxIP	21	364.69	24.7
IH4	2019-12-18_20X_Hypoxia_Lung4.6_SOX9_HOPX_SFTPC_002-MaxIP	32	385.99	23.56
IH4	2019-12-18_20X_Hypoxia_Lung4.6_SOX9_HOPX_SFTPC_002-MaxIP	46	399.92	23.72
IH4	2019-12-18_20X_Hypoxia_Lung4.6_SOX9_HOPX_SFTPC_002-MaxIP	39	403.02	21.88
IH4	2019-12-18_20X_Hypoxia_Lung4.6_SOX9_HOPX_SFTPC_002-MaxIP	101	408.44	22.3
IH4	2019-12-18_20X_Hypoxia_Lung4.6_SOX9_HOPX_SFTPC_002-MaxIP	118	423.93	27.62
IH4	2019-12-18_20X_Hypoxia_Lung4.6_SOX9_HOPX_SFTPC_002-MaxIP	72	432.06	24.03
IH4	2019-12-18_20X_Hypoxia_Lung4.6_SOX9_HOPX_SFTPC_002-MaxIP	77	452.19	23.58
IH4	2019-12-18_20X_Hypoxia_Lung4.6_SOX9_HOPX_SFTPC_002-MaxIP	69	461.09	25.67
IH4	2019-12-18_20X_Hypoxia_Lung4.6_SOX9_HOPX_SFTPC_002-MaxIP	131	463.8	21.46
IH4	2019-12-18_20X_Hypoxia_Lung4.6_SOX9_HOPX_SFTPC_002-MaxIP	136	466.51	21.31
IH4	2019-12-18_20X_Hypoxia_Lung4.6_SOX9_HOPX_SFTPC_002-MaxIP	129	490.52	27.25
IH4	2019-12-18_20X_Hypoxia_Lung4.6_SOX9_HOPX_SFTPC_002-MaxIP	66	499.81	26.55
IH4	2019-12-18_20X_Hypoxia_Lung4.6_SOX9_HOPX_SFTPC_002-MaxIP	91	519.16	23.15
IH4	2019-12-18_20X_Hypoxia_Lung4.6_SOX9_HOPX_SFTPC_002-MaxIP	95	545.49	29.65
IH4	2019-12-18_20X_Hypoxia_Lung4.6_SOX9_HOPX_SFTPC_002-MaxIP	113	547.43	29.15
IH4	2019-12-18_20X_Hypoxia_Lung4.6_SOX9_HOPX_SFTPC_002-MaxIP	48	547.81	22.05
IH4	2019-12-18_20X_Hypoxia_Lung4.6_SOX9_HOPX_SFTPC_002-MaxIP	40	559.04	25.12
IH4	2019-12-18_20X_Hypoxia_Lung4.6_SOX9_HOPX_SFTPC_002-MaxIP	68	570.66	26.22
IH4	2019-12-18_20X_Hypoxia_Lung4.6_SOX9_HOPX_SFTPC_002-MaxIP	3	572.98	25.62
IH4	2019-12-18_20X_Hypoxia_Lung4.6_SOX9_HOPX_SFTPC_002-MaxIP	122	581.11	27.38
IH4	2019-12-18_20X_Hypoxia_Lung4.6_SOX9_HOPX_SFTPC_002-MaxIP	27	598.14	28.96
IH4	2019-12-18_20X_Hypoxia_Lung4.6_SOX9_HOPX_SFTPC_002-MaxIP	4	614.02	26.56
IH4	2019-12-18_20X_Hypoxia_Lung4.6_SOX9_HOPX_SFTPC_002-MaxIP	76	640.34	30.81
IH4	2019-12-18_20X_Hypoxia_Lung4.6_SOX9_HOPX_SFTPC_002-MaxIP	98	677.51	32.46
IH4	2019-12-18_20X_Hypoxia_Lung4.6_SOX9_HOPX_SFTPC_002-MaxIP	18	679.44	31.3
IH4	2019-12-18_20X_Hypoxia_Lung4.6_SOX9_HOPX_SFTPC_002-MaxIP	90	704.22	26.27
IH4	2019-12-18_20X_Hypoxia_Lung4.6_SOX9_HOPX_SFTPC_002-MaxIP	86	715.84	33.15
IH4	2019-12-18_20X_Hypoxia_Lung4.6_SOX9_HOPX_SFTPC_002-MaxIP	10	725.13	28.71
IH4	2019-12-18_20X_Hypoxia_Lung4.6_SOX9_HOPX_SFTPC_002-MaxIP	5	744.1	30.38
IH4	2019-12-18_20X_Hypoxia_Lung4.6_SOX9_HOPX_SFTPC_002-MaxIP	49	746.03	36.47
IH4	2019-12-18_20X_Hypoxia_Lung4.6_SOX9_HOPX_SFTPC_002-MaxIP	128	771.2	29.29
IH4	2019-12-18_20X_Hypoxia_Lung4.6_SOX9_HOPX_SFTPC_002-MaxIP	103	804.88	29.14
IH4	2019-12-18_20X_Hypoxia_Lung4.6_SOX9_HOPX_SFTPC_002-MaxIP	88	806.43	34.65
IH4	2019-12-18_20X_Hypoxia_Lung4.6_SOX9_HOPX_SFTPC_002-MaxIP	15	816.49	27.84
IH4	2019-12-18_20X_Hypoxia_Lung4.6_SOX9_HOPX_SFTPC_002-MaxIP	2	831.59	34.45
IH4	2019-12-18_20X_Hypoxia_Lung4.6_SOX9_HOPX_SFTPC_002-MaxIP	80	833.92	28.71
IH4	2019-12-18_20X_Hypoxia_Lung4.6_SOX9_HOPX_SFTPC_002-MaxIP	134	844.37	36.45
IH4	2019-12-18_20X_Hypoxia_Lung4.6_SOX9_HOPX_SFTPC_002-MaxIP	70	883.86	29.72
IH4	2019-12-18_20X_Hypoxia_Lung4.6_SOX9_HOPX_SFTPC_002-MaxIP	115	888.89	39.18
IH4	2019-12-18_20X_Hypoxia_Lung4.6_SOX9_HOPX_SFTPC_002-MaxIP	96	905.92	33.22
IH4	2019-12-18_20X_Hypoxia_Lung4.6_SOX9_HOPX_SFTPC_002-MaxIP	11	917.15	37.4
IH4	2019-12-18_20X_Hypoxia_Lung4.6_SOX9_HOPX_SFTPC_002-MaxIP	130	943.86	34.04
IH4	2019-12-18_20X_Hypoxia_Lung4.6_SOX9_HOPX_SFTPC_002-MaxIP	65	1030.59	34.64
IH4	2019-12-18_20X_Hypoxia_Lung4.6_SOX9_HOPX_SFTPC_002-MaxIP	112	1056.52	32.15
IH4	2019-12-18_20X_Hypoxia_Lung4.6_SOX9_HOPX_SFTPC_002-MaxIP	52	1066.2	38.68
IH4	2019-12-18_20X_Hypoxia_Lung4.6_SOX9_HOPX_SFTPC_002-MaxIP	117	1103.76	33.26
IH4	2019-12-18_20X_Hypoxia_Lung4.6_SOX9_HOPX_SFTPC_002-MaxIP	62	1132.41	47.38
IH4	2019-12-18_20X_Hypoxia_Lung4.6_SOX9_HOPX_SFTPC_002-MaxIP	81	1143.25	35.32
IH4	2019-12-18_20X_Hypoxia_Lung4.6_SOX9_HOPX_SFTPC_002-MaxIP	71	1164.54	35.63
IH4	2019-12-18_20X_Hypoxia_Lung4.6_SOX9_HOPX_SFTPC_002-MaxIP	123	1209.06	43.16
IH4	2019-12-18_20X_Hypoxia_Lung4.6_SOX9_HOPX_SFTPC_002-MaxIP	55	1214.48	42.29
IH4	2019-12-18_20X_Hypoxia_Lung4.6_SOX9_HOPX_SFTPC_002-MaxIP	102	1344.95	41.7
IH4	2019-12-18_20X_Hypoxia_Lung4.6_SOX9_HOPX_SFTPC_002-MaxIP	51	1365.47	44.98
IH4	2019-12-18_20X_Hypoxia_Lung4.6_SOX9_HOPX_SFTPC_002-MaxIP	45	1369.34	45.82
IH4	2019-12-18_20X_Hypoxia_Lung4.6_SOX9_HOPX_SFTPC_002-MaxIP	47	1416.18	45.44
IH4	2019-12-18_20X_Hypoxia_Lung4.6_SOX9_HOPX_SFTPC_002-MaxIP	43	1515.29	50.99
IH4	2019-12-18_20X_Hypoxia_Lung4.6_SOX9_HOPX_SFTPC_002-MaxIP	19	1580.72	53.29
IH4	2019-12-18_20X_Hypoxia_Lung4.6_SOX9_HOPX_SFTPC_002-MaxIP	67	1595.43	40.24
IH4	2019-12-18_20X_Hypoxia_Lung4.6_SOX9_HOPX_SFTPC_002-MaxIP	100	1620.21	51.58
IH4	2019-12-18_20X_Hypoxia_Lung4.6_SOX9_HOPX_SFTPC_002-MaxIP	8	1659.31	40.85
IH4	2019-12-18_20X_Hypoxia_Lung4.6_SOX9_HOPX_SFTPC_002-MaxIP	42	1713.51	50.27
IH4	2019-12-18_20X_Hypoxia_Lung4.6_SOX9_HOPX_SFTPC_002-MaxIP	54	1796.75	44.27
IH4	2019-12-18_20X_Hypoxia_Lung4.6_SOX9_HOPX_SFTPC_002-MaxIP	41	1879.99	49.42
IH4	2019-12-18_20X_Hypoxia_Lung4.6_SOX9_HOPX_SFTPC_002-MaxIP	83	1936.9	58.2
IH4	2019-12-18_20X_Hypoxia_Lung4.6_SOX9_HOPX_SFTPC_002-MaxIP	31	2082.85	51.54
IH4	2019-12-18_20X_Hypoxia_Lung4.6_SOX9_HOPX_SFTPC_002-MaxIP	119	2085.18	51.63
IH4	2019-12-18_20X_Hypoxia_Lung4.6_SOX9_HOPX_SFTPC_002-MaxIP	17	2193.58	54.81
IH4	2019-12-18_20X_Hypoxia_Lung4.6_SOX9_HOPX_SFTPC_002-MaxIP	94	2226.48	48.63
IH4	2019-12-18_20X_Hypoxia_Lung4.6_SOX9_HOPX_SFTPC_002-MaxIP	73	2453.35	61.53
IH4	2019-12-18_20X_Hypoxia_Lung4.6_SOX9_HOPX_SFTPC_003-MaxIP	164	51.1	6.88
IH4	2019-12-18_20X_Hypoxia_Lung4.6_SOX9_HOPX_SFTPC_003-MaxIP	131	54.2	8.08
IH4	2019-12-18_20X_Hypoxia_Lung4.6_SOX9_HOPX_SFTPC_003-MaxIP	34	54.59	7.94
IH4	2019-12-18_20X_Hypoxia_Lung4.6_SOX9_HOPX_SFTPC_003-MaxIP	67	56.14	6.82
IH4	2019-12-18_20X_Hypoxia_Lung4.6_SOX9_HOPX_SFTPC_003-MaxIP	25	59.62	7.31
IH4	2019-12-18_20X_Hypoxia_Lung4.6_SOX9_HOPX_SFTPC_003-MaxIP	143	59.62	8.31
IH4	2019-12-18_20X_Hypoxia_Lung4.6_SOX9_HOPX_SFTPC_003-MaxIP	112	60.78	9.48
IH4	2019-12-18_20X_Hypoxia_Lung4.6_SOX9_HOPX_SFTPC_003-MaxIP	121	63.88	8.26
IH4	2019-12-18_20X_Hypoxia_Lung4.6_SOX9_HOPX_SFTPC_003-MaxIP	64	65.82	11.85
IH4	2019-12-18_20X_Hypoxia_Lung4.6_SOX9_HOPX_SFTPC_003-MaxIP	109	66.59	11.1
IH4	2019-12-18_20X_Hypoxia_Lung4.6_SOX9_HOPX_SFTPC_003-MaxIP	76	69.3	9.04
IH4	2019-12-18_20X_Hypoxia_Lung4.6_SOX9_HOPX_SFTPC_003-MaxIP	6	69.69	7.12
IH4	2019-12-18_20X_Hypoxia_Lung4.6_SOX9_HOPX_SFTPC_003-MaxIP	44	70.85	10.32
IH4	2019-12-18_20X_Hypoxia_Lung4.6_SOX9_HOPX_SFTPC_003-MaxIP	70	71.62	7.29
IH4	2019-12-18_20X_Hypoxia_Lung4.6_SOX9_HOPX_SFTPC_003-MaxIP	50	73.95	7.94
IH4	2019-12-18_20X_Hypoxia_Lung4.6_SOX9_HOPX_SFTPC_003-MaxIP	1	75.11	10.54
IH4	2019-12-18_20X_Hypoxia_Lung4.6_SOX9_HOPX_SFTPC_003-MaxIP	111	75.49	9.84
IH4	2019-12-18_20X_Hypoxia_Lung4.6_SOX9_HOPX_SFTPC_003-MaxIP	103	76.66	10.1
IH4	2019-12-18_20X_Hypoxia_Lung4.6_SOX9_HOPX_SFTPC_003-MaxIP	142	76.66	11.37
IH4	2019-12-18_20X_Hypoxia_Lung4.6_SOX9_HOPX_SFTPC_003-MaxIP	165	78.98	10.75
IH4	2019-12-18_20X_Hypoxia_Lung4.6_SOX9_HOPX_SFTPC_003-MaxIP	124	80.91	10.37
IH4	2019-12-18_20X_Hypoxia_Lung4.6_SOX9_HOPX_SFTPC_003-MaxIP	54	81.3	10.82
IH4	2019-12-18_20X_Hypoxia_Lung4.6_SOX9_HOPX_SFTPC_003-MaxIP	125	81.3	10.27
IH4	2019-12-18_20X_Hypoxia_Lung4.6_SOX9_HOPX_SFTPC_003-MaxIP	108	85.56	8.23
IH4	2019-12-18_20X_Hypoxia_Lung4.6_SOX9_HOPX_SFTPC_003-MaxIP	168	86.33	10.04
IH4	2019-12-18_20X_Hypoxia_Lung4.6_SOX9_HOPX_SFTPC_003-MaxIP	114	87.11	6.5
IH4	2019-12-18_20X_Hypoxia_Lung4.6_SOX9_HOPX_SFTPC_003-MaxIP	32	88.66	11.31
IH4	2019-12-18_20X_Hypoxia_Lung4.6_SOX9_HOPX_SFTPC_003-MaxIP	88	89.04	10.52
IH4	2019-12-18_20X_Hypoxia_Lung4.6_SOX9_HOPX_SFTPC_003-MaxIP	158	92.53	13.46
IH4	2019-12-18_20X_Hypoxia_Lung4.6_SOX9_HOPX_SFTPC_003-MaxIP	147	98.34	12.32
IH4	2019-12-18_20X_Hypoxia_Lung4.6_SOX9_HOPX_SFTPC_003-MaxIP	3	100.27	9.64
IH4	2019-12-18_20X_Hypoxia_Lung4.6_SOX9_HOPX_SFTPC_003-MaxIP	91	101.05	12.04
IH4	2019-12-18_20X_Hypoxia_Lung4.6_SOX9_HOPX_SFTPC_003-MaxIP	20	104.53	11.17
IH4	2019-12-18_20X_Hypoxia_Lung4.6_SOX9_HOPX_SFTPC_003-MaxIP	43	108.01	10.97
IH4	2019-12-18_20X_Hypoxia_Lung4.6_SOX9_HOPX_SFTPC_003-MaxIP	123	114.21	11.39
IH4	2019-12-18_20X_Hypoxia_Lung4.6_SOX9_HOPX_SFTPC_003-MaxIP	107	114.6	11.4
IH4	2019-12-18_20X_Hypoxia_Lung4.6_SOX9_HOPX_SFTPC_003-MaxIP	153	119.24	12.5
IH4	2019-12-18_20X_Hypoxia_Lung4.6_SOX9_HOPX_SFTPC_003-MaxIP	149	124.66	12.75
IH4	2019-12-18_20X_Hypoxia_Lung4.6_SOX9_HOPX_SFTPC_003-MaxIP	89	127.76	11.92
IH4	2019-12-18_20X_Hypoxia_Lung4.6_SOX9_HOPX_SFTPC_003-MaxIP	42	130.86	12.28
IH4	2019-12-18_20X_Hypoxia_Lung4.6_SOX9_HOPX_SFTPC_003-MaxIP	73	130.86	14.17
IH4	2019-12-18_20X_Hypoxia_Lung4.6_SOX9_HOPX_SFTPC_003-MaxIP	18	137.44	13.24
IH4	2019-12-18_20X_Hypoxia_Lung4.6_SOX9_HOPX_SFTPC_003-MaxIP	127	137.82	17.43
IH4	2019-12-18_20X_Hypoxia_Lung4.6_SOX9_HOPX_SFTPC_003-MaxIP	167	142.08	15.52
IH4	2019-12-18_20X_Hypoxia_Lung4.6_SOX9_HOPX_SFTPC_003-MaxIP	37	142.86	13.6
IH4	2019-12-18_20X_Hypoxia_Lung4.6_SOX9_HOPX_SFTPC_003-MaxIP	60	144.41	14.93
IH4	2019-12-18_20X_Hypoxia_Lung4.6_SOX9_HOPX_SFTPC_003-MaxIP	115	146.73	13.51
IH4	2019-12-18_20X_Hypoxia_Lung4.6_SOX9_HOPX_SFTPC_003-MaxIP	160	151.37	13.99
IH4	2019-12-18_20X_Hypoxia_Lung4.6_SOX9_HOPX_SFTPC_003-MaxIP	94	153.31	12.84
IH4	2019-12-18_20X_Hypoxia_Lung4.6_SOX9_HOPX_SFTPC_003-MaxIP	35	157.57	14.3
IH4	2019-12-18_20X_Hypoxia_Lung4.6_SOX9_HOPX_SFTPC_003-MaxIP	47	158.34	14.21
IH4	2019-12-18_20X_Hypoxia_Lung4.6_SOX9_HOPX_SFTPC_003-MaxIP	51	158.34	10.39
IH4	2019-12-18_20X_Hypoxia_Lung4.6_SOX9_HOPX_SFTPC_003-MaxIP	5	171.89	14.18
IH4	2019-12-18_20X_Hypoxia_Lung4.6_SOX9_HOPX_SFTPC_003-MaxIP	16	175.38	16.14
IH4	2019-12-18_20X_Hypoxia_Lung4.6_SOX9_HOPX_SFTPC_003-MaxIP	10	177.31	17.6
IH4	2019-12-18_20X_Hypoxia_Lung4.6_SOX9_HOPX_SFTPC_003-MaxIP	87	179.25	14.89
IH4	2019-12-18_20X_Hypoxia_Lung4.6_SOX9_HOPX_SFTPC_003-MaxIP	11	181.96	14.88
IH4	2019-12-18_20X_Hypoxia_Lung4.6_SOX9_HOPX_SFTPC_003-MaxIP	134	182.35	15.49
IH4	2019-12-18_20X_Hypoxia_Lung4.6_SOX9_HOPX_SFTPC_003-MaxIP	148	183.89	15.11
IH4	2019-12-18_20X_Hypoxia_Lung4.6_SOX9_HOPX_SFTPC_003-MaxIP	137	185.06	17.02
IH4	2019-12-18_20X_Hypoxia_Lung4.6_SOX9_HOPX_SFTPC_003-MaxIP	31	186.99	14.31
IH4	2019-12-18_20X_Hypoxia_Lung4.6_SOX9_HOPX_SFTPC_003-MaxIP	69	196.67	15.7
IH4	2019-12-18_20X_Hypoxia_Lung4.6_SOX9_HOPX_SFTPC_003-MaxIP	106	200.93	14.75
IH4	2019-12-18_20X_Hypoxia_Lung4.6_SOX9_HOPX_SFTPC_003-MaxIP	62	204.41	16.79
IH4	2019-12-18_20X_Hypoxia_Lung4.6_SOX9_HOPX_SFTPC_003-MaxIP	161	213.71	16.89
IH4	2019-12-18_20X_Hypoxia_Lung4.6_SOX9_HOPX_SFTPC_003-MaxIP	152	216.03	14.46
IH4	2019-12-18_20X_Hypoxia_Lung4.6_SOX9_HOPX_SFTPC_003-MaxIP	71	221.06	12.82
IH4	2019-12-18_20X_Hypoxia_Lung4.6_SOX9_HOPX_SFTPC_003-MaxIP	101	229.19	16.36
IH4	2019-12-18_20X_Hypoxia_Lung4.6_SOX9_HOPX_SFTPC_003-MaxIP	126	231.13	19.63
IH4	2019-12-18_20X_Hypoxia_Lung4.6_SOX9_HOPX_SFTPC_003-MaxIP	159	234.22	16.87
IH4	2019-12-18_20X_Hypoxia_Lung4.6_SOX9_HOPX_SFTPC_003-MaxIP	41	235.77	15.83
IH4	2019-12-18_20X_Hypoxia_Lung4.6_SOX9_HOPX_SFTPC_003-MaxIP	79	240.42	17.74
IH4	2019-12-18_20X_Hypoxia_Lung4.6_SOX9_HOPX_SFTPC_003-MaxIP	130	242.74	14.92
IH4	2019-12-18_20X_Hypoxia_Lung4.6_SOX9_HOPX_SFTPC_003-MaxIP	46	250.48	18.13
IH4	2019-12-18_20X_Hypoxia_Lung4.6_SOX9_HOPX_SFTPC_003-MaxIP	75	250.48	16.18
IH4	2019-12-18_20X_Hypoxia_Lung4.6_SOX9_HOPX_SFTPC_003-MaxIP	118	252.42	14.76
IH4	2019-12-18_20X_Hypoxia_Lung4.6_SOX9_HOPX_SFTPC_003-MaxIP	169	253.97	18.01
IH4	2019-12-18_20X_Hypoxia_Lung4.6_SOX9_HOPX_SFTPC_003-MaxIP	113	259.78	19.19
IH4	2019-12-18_20X_Hypoxia_Lung4.6_SOX9_HOPX_SFTPC_003-MaxIP	7	264.42	17.47
IH4	2019-12-18_20X_Hypoxia_Lung4.6_SOX9_HOPX_SFTPC_003-MaxIP	36	264.42	17.27
IH4	2019-12-18_20X_Hypoxia_Lung4.6_SOX9_HOPX_SFTPC_003-MaxIP	82	271	13.7
IH4	2019-12-18_20X_Hypoxia_Lung4.6_SOX9_HOPX_SFTPC_003-MaxIP	83	271.78	19.51
IH4	2019-12-18_20X_Hypoxia_Lung4.6_SOX9_HOPX_SFTPC_003-MaxIP	74	273.33	19.54
IH4	2019-12-18_20X_Hypoxia_Lung4.6_SOX9_HOPX_SFTPC_003-MaxIP	53	283	22.16
IH4	2019-12-18_20X_Hypoxia_Lung4.6_SOX9_HOPX_SFTPC_003-MaxIP	139	300.81	20.24
IH4	2019-12-18_20X_Hypoxia_Lung4.6_SOX9_HOPX_SFTPC_003-MaxIP	100	310.88	14.74
IH4	2019-12-18_20X_Hypoxia_Lung4.6_SOX9_HOPX_SFTPC_003-MaxIP	21	314.75	24.49
IH4	2019-12-18_20X_Hypoxia_Lung4.6_SOX9_HOPX_SFTPC_003-MaxIP	138	316.69	26.2
IH4	2019-12-18_20X_Hypoxia_Lung4.6_SOX9_HOPX_SFTPC_003-MaxIP	8	317.85	13.17
IH4	2019-12-18_20X_Hypoxia_Lung4.6_SOX9_HOPX_SFTPC_003-MaxIP	45	334.5	15.72
IH4	2019-12-18_20X_Hypoxia_Lung4.6_SOX9_HOPX_SFTPC_003-MaxIP	90	334.88	17.18
IH4	2019-12-18_20X_Hypoxia_Lung4.6_SOX9_HOPX_SFTPC_003-MaxIP	95	335.66	14.84
IH4	2019-12-18_20X_Hypoxia_Lung4.6_SOX9_HOPX_SFTPC_003-MaxIP	57	353.47	22.01
IH4	2019-12-18_20X_Hypoxia_Lung4.6_SOX9_HOPX_SFTPC_003-MaxIP	84	356.95	23.72
IH4	2019-12-18_20X_Hypoxia_Lung4.6_SOX9_HOPX_SFTPC_003-MaxIP	52	365.08	18.82
IH4	2019-12-18_20X_Hypoxia_Lung4.6_SOX9_HOPX_SFTPC_003-MaxIP	81	373.21	20.91
IH4	2019-12-18_20X_Hypoxia_Lung4.6_SOX9_HOPX_SFTPC_003-MaxIP	156	380.95	20.04
IH4	2019-12-18_20X_Hypoxia_Lung4.6_SOX9_HOPX_SFTPC_003-MaxIP	77	381.73	22.1
IH4	2019-12-18_20X_Hypoxia_Lung4.6_SOX9_HOPX_SFTPC_003-MaxIP	38	387.53	23.81
IH4	2019-12-18_20X_Hypoxia_Lung4.6_SOX9_HOPX_SFTPC_003-MaxIP	93	392.18	25.29
IH4	2019-12-18_20X_Hypoxia_Lung4.6_SOX9_HOPX_SFTPC_003-MaxIP	56	396.44	25.33
IH4	2019-12-18_20X_Hypoxia_Lung4.6_SOX9_HOPX_SFTPC_003-MaxIP	29	400.31	18.71
IH4	2019-12-18_20X_Hypoxia_Lung4.6_SOX9_HOPX_SFTPC_003-MaxIP	151	405.73	22.68
IH4	2019-12-18_20X_Hypoxia_Lung4.6_SOX9_HOPX_SFTPC_003-MaxIP	61	408.44	21.59
IH4	2019-12-18_20X_Hypoxia_Lung4.6_SOX9_HOPX_SFTPC_003-MaxIP	49	417.34	22.95
IH4	2019-12-18_20X_Hypoxia_Lung4.6_SOX9_HOPX_SFTPC_003-MaxIP	116	417.34	19.91
IH4	2019-12-18_20X_Hypoxia_Lung4.6_SOX9_HOPX_SFTPC_003-MaxIP	129	418.89	24.23
IH4	2019-12-18_20X_Hypoxia_Lung4.6_SOX9_HOPX_SFTPC_003-MaxIP	19	419.67	22.84
IH4	2019-12-18_20X_Hypoxia_Lung4.6_SOX9_HOPX_SFTPC_003-MaxIP	117	423.93	29.26
IH4	2019-12-18_20X_Hypoxia_Lung4.6_SOX9_HOPX_SFTPC_003-MaxIP	135	431.67	19.62
IH4	2019-12-18_20X_Hypoxia_Lung4.6_SOX9_HOPX_SFTPC_003-MaxIP	170	447.93	23.74
IH4	2019-12-18_20X_Hypoxia_Lung4.6_SOX9_HOPX_SFTPC_003-MaxIP	68	449.09	24.1
IH4	2019-12-18_20X_Hypoxia_Lung4.6_SOX9_HOPX_SFTPC_003-MaxIP	2	465.35	25.13
IH4	2019-12-18_20X_Hypoxia_Lung4.6_SOX9_HOPX_SFTPC_003-MaxIP	65	467.67	24.89
IH4	2019-12-18_20X_Hypoxia_Lung4.6_SOX9_HOPX_SFTPC_003-MaxIP	141	470.77	28.95
IH4	2019-12-18_20X_Hypoxia_Lung4.6_SOX9_HOPX_SFTPC_003-MaxIP	97	483.93	26.01
IH4	2019-12-18_20X_Hypoxia_Lung4.6_SOX9_HOPX_SFTPC_003-MaxIP	58	509.49	24.47
IH4	2019-12-18_20X_Hypoxia_Lung4.6_SOX9_HOPX_SFTPC_003-MaxIP	102	520.71	26.72
IH4	2019-12-18_20X_Hypoxia_Lung4.6_SOX9_HOPX_SFTPC_003-MaxIP	155	539.3	23.68
IH4	2019-12-18_20X_Hypoxia_Lung4.6_SOX9_HOPX_SFTPC_003-MaxIP	128	545.88	24.18
IH4	2019-12-18_20X_Hypoxia_Lung4.6_SOX9_HOPX_SFTPC_003-MaxIP	144	546.65	28.38
IH4	2019-12-18_20X_Hypoxia_Lung4.6_SOX9_HOPX_SFTPC_003-MaxIP	12	557.49	29.07
IH4	2019-12-18_20X_Hypoxia_Lung4.6_SOX9_HOPX_SFTPC_003-MaxIP	92	557.49	20.78
IH4	2019-12-18_20X_Hypoxia_Lung4.6_SOX9_HOPX_SFTPC_003-MaxIP	145	557.49	26.75
IH4	2019-12-18_20X_Hypoxia_Lung4.6_SOX9_HOPX_SFTPC_003-MaxIP	66	557.88	32
IH4	2019-12-18_20X_Hypoxia_Lung4.6_SOX9_HOPX_SFTPC_003-MaxIP	99	567.95	24.62
IH4	2019-12-18_20X_Hypoxia_Lung4.6_SOX9_HOPX_SFTPC_003-MaxIP	14	569.88	31.26
IH4	2019-12-18_20X_Hypoxia_Lung4.6_SOX9_HOPX_SFTPC_003-MaxIP	146	575.3	27.41
IH4	2019-12-18_20X_Hypoxia_Lung4.6_SOX9_HOPX_SFTPC_003-MaxIP	119	589.24	27.86
IH4	2019-12-18_20X_Hypoxia_Lung4.6_SOX9_HOPX_SFTPC_003-MaxIP	98	603.18	28.35
IH4	2019-12-18_20X_Hypoxia_Lung4.6_SOX9_HOPX_SFTPC_003-MaxIP	154	603.95	17.12
IH4	2019-12-18_20X_Hypoxia_Lung4.6_SOX9_HOPX_SFTPC_003-MaxIP	136	620.6	29.78
IH4	2019-12-18_20X_Hypoxia_Lung4.6_SOX9_HOPX_SFTPC_003-MaxIP	28	651.57	30.38
IH4	2019-12-18_20X_Hypoxia_Lung4.6_SOX9_HOPX_SFTPC_003-MaxIP	163	720.09	31.09
IH4	2019-12-18_20X_Hypoxia_Lung4.6_SOX9_HOPX_SFTPC_003-MaxIP	157	735.19	25.26
IH4	2019-12-18_20X_Hypoxia_Lung4.6_SOX9_HOPX_SFTPC_003-MaxIP	17	806.81	34.96
IH4	2019-12-18_20X_Hypoxia_Lung4.6_SOX9_HOPX_SFTPC_003-MaxIP	13	844.76	33.1
IH4	2019-12-18_20X_Hypoxia_Lung4.6_SOX9_HOPX_SFTPC_003-MaxIP	96	902.05	26.46
IH4	2019-12-18_20X_Hypoxia_Lung4.6_SOX9_HOPX_SFTPC_003-MaxIP	4	909.41	42.07
IH4	2019-12-18_20X_Hypoxia_Lung4.6_SOX9_HOPX_SFTPC_003-MaxIP	63	929.15	38.78
IH4	2019-12-18_20X_Hypoxia_Lung4.6_SOX9_HOPX_SFTPC_003-MaxIP	133	957.8	34.83
IH4	2019-12-18_20X_Hypoxia_Lung4.6_SOX9_HOPX_SFTPC_003-MaxIP	110	964	37.64
IH4	2019-12-18_20X_Hypoxia_Lung4.6_SOX9_HOPX_SFTPC_003-MaxIP	122	966.71	43.84
IH4	2019-12-18_20X_Hypoxia_Lung4.6_SOX9_HOPX_SFTPC_003-MaxIP	33	977.16	31.49
IH4	2019-12-18_20X_Hypoxia_Lung4.6_SOX9_HOPX_SFTPC_003-MaxIP	27	1008.52	36.62
IH4	2019-12-18_20X_Hypoxia_Lung4.6_SOX9_HOPX_SFTPC_003-MaxIP	30	1016.65	36.48
IH4	2019-12-18_20X_Hypoxia_Lung4.6_SOX9_HOPX_SFTPC_003-MaxIP	26	1027.49	39
IH4	2019-12-18_20X_Hypoxia_Lung4.6_SOX9_HOPX_SFTPC_003-MaxIP	166	1041.04	42.27
IH4	2019-12-18_20X_Hypoxia_Lung4.6_SOX9_HOPX_SFTPC_003-MaxIP	105	1042.97	32.62
IH4	2019-12-18_20X_Hypoxia_Lung4.6_SOX9_HOPX_SFTPC_003-MaxIP	9	1059.62	31.81
IH4	2019-12-18_20X_Hypoxia_Lung4.6_SOX9_HOPX_SFTPC_003-MaxIP	24	1072.01	44.38
IH4	2019-12-18_20X_Hypoxia_Lung4.6_SOX9_HOPX_SFTPC_003-MaxIP	78	1080.92	45.8
IH4	2019-12-18_20X_Hypoxia_Lung4.6_SOX9_HOPX_SFTPC_003-MaxIP	15	1090.21	38.52
IH4	2019-12-18_20X_Hypoxia_Lung4.6_SOX9_HOPX_SFTPC_003-MaxIP	23	1191.64	40.56
IH4	2019-12-18_20X_Hypoxia_Lung4.6_SOX9_HOPX_SFTPC_003-MaxIP	59	1248.16	48.63
IH4	2019-12-18_20X_Hypoxia_Lung4.6_SOX9_HOPX_SFTPC_003-MaxIP	162	1273.71	49.95
IH4	2019-12-18_20X_Hypoxia_Lung4.6_SOX9_HOPX_SFTPC_003-MaxIP	40	1278.75	39.41
IH4	2019-12-18_20X_Hypoxia_Lung4.6_SOX9_HOPX_SFTPC_003-MaxIP	86	1305.85	48.62
IH4	2019-12-18_20X_Hypoxia_Lung4.6_SOX9_HOPX_SFTPC_003-MaxIP	22	1359.27	41.55
IH4	2019-12-18_20X_Hypoxia_Lung4.6_SOX9_HOPX_SFTPC_003-MaxIP	132	1383.28	53.06
IH4	2019-12-18_20X_Hypoxia_Lung4.6_SOX9_HOPX_SFTPC_003-MaxIP	120	1401.86	45.75
IH4	2019-12-18_20X_Hypoxia_Lung4.6_SOX9_HOPX_SFTPC_003-MaxIP	140	1570.27	45.34
IH4	2019-12-18_20X_Hypoxia_Lung4.6_SOX9_HOPX_SFTPC_003-MaxIP	104	1591.18	43.63
IH4	2019-12-18_20X_Hypoxia_Lung4.6_SOX9_HOPX_SFTPC_003-MaxIP	48	1604.34	36.24
IH4	2019-12-18_20X_Hypoxia_Lung4.6_SOX9_HOPX_SFTPC_003-MaxIP	39	1771.97	61.32
IH4	2019-12-18_20X_Hypoxia_Lung4.6_SOX9_HOPX_SFTPC_003-MaxIP	150	1817.27	48.05
IH4	2019-12-18_20X_Hypoxia_Lung4.6_SOX9_HOPX_SFTPC_003-MaxIP	72	1818.04	50.47
IH4	2019-12-18_20X_Hypoxia_Lung4.6_SOX9_HOPX_SFTPC_003-MaxIP	55	1960.13	48.52
IH4	2019-12-18_20X_Hypoxia_Lung4.6_SOX9_HOPX_SFTPC_003-MaxIP	85	2114.6	58.5
IH4	2019-12-18_20X_Hypoxia_Lung4.6_SOX9_HOPX_SFTPC_003-MaxIP	80	2465.35	57.11
IH2	2019-12-18_20X_Hypoxia_Lung2.6_SOX9_HOPX_SFTPC_001.nd2	59	50.72	9.93
IH2	2019-12-18_20X_Hypoxia_Lung2.6_SOX9_HOPX_SFTPC_001.nd2	197	51.1	6.24
IH2	2019-12-18_20X_Hypoxia_Lung2.6_SOX9_HOPX_SFTPC_001.nd2	132	52.26	7.4
IH2	2019-12-18_20X_Hypoxia_Lung2.6_SOX9_HOPX_SFTPC_001.nd2	198	52.65	9.42
IH2	2019-12-18_20X_Hypoxia_Lung2.6_SOX9_HOPX_SFTPC_001.nd2	183	53.04	8.92
IH2	2019-12-18_20X_Hypoxia_Lung2.6_SOX9_HOPX_SFTPC_001.nd2	7	53.43	6.68
IH2	2019-12-18_20X_Hypoxia_Lung2.6_SOX9_HOPX_SFTPC_001.nd2	178	53.43	8.52
IH2	2019-12-18_20X_Hypoxia_Lung2.6_SOX9_HOPX_SFTPC_001.nd2	56	53.81	9.51
IH2	2019-12-18_20X_Hypoxia_Lung2.6_SOX9_HOPX_SFTPC_001.nd2	112	53.81	6.75
IH2	2019-12-18_20X_Hypoxia_Lung2.6_SOX9_HOPX_SFTPC_001.nd2	23	55.75	9.56
IH2	2019-12-18_20X_Hypoxia_Lung2.6_SOX9_HOPX_SFTPC_001.nd2	48	55.75	6.73
IH2	2019-12-18_20X_Hypoxia_Lung2.6_SOX9_HOPX_SFTPC_001.nd2	61	56.14	9.64
IH2	2019-12-18_20X_Hypoxia_Lung2.6_SOX9_HOPX_SFTPC_001.nd2	45	57.68	7.87
IH2	2019-12-18_20X_Hypoxia_Lung2.6_SOX9_HOPX_SFTPC_001.nd2	10	58.85	7.11
IH2	2019-12-18_20X_Hypoxia_Lung2.6_SOX9_HOPX_SFTPC_001.nd2	200	62.33	8.56
IH2	2019-12-18_20X_Hypoxia_Lung2.6_SOX9_HOPX_SFTPC_001.nd2	156	62.72	10.87
IH2	2019-12-18_20X_Hypoxia_Lung2.6_SOX9_HOPX_SFTPC_001.nd2	130	63.11	7.59
IH2	2019-12-18_20X_Hypoxia_Lung2.6_SOX9_HOPX_SFTPC_001.nd2	70	64.27	10.72
IH2	2019-12-18_20X_Hypoxia_Lung2.6_SOX9_HOPX_SFTPC_001.nd2	57	65.04	10.25
IH2	2019-12-18_20X_Hypoxia_Lung2.6_SOX9_HOPX_SFTPC_001.nd2	64	66.2	8.09
IH2	2019-12-18_20X_Hypoxia_Lung2.6_SOX9_HOPX_SFTPC_001.nd2	202	66.59	9.13
IH2	2019-12-18_20X_Hypoxia_Lung2.6_SOX9_HOPX_SFTPC_001.nd2	43	68.14	9.85
IH2	2019-12-18_20X_Hypoxia_Lung2.6_SOX9_HOPX_SFTPC_001.nd2	195	68.53	9.79
IH2	2019-12-18_20X_Hypoxia_Lung2.6_SOX9_HOPX_SFTPC_001.nd2	76	70.85	10.65
IH2	2019-12-18_20X_Hypoxia_Lung2.6_SOX9_HOPX_SFTPC_001.nd2	140	71.62	10.43
IH2	2019-12-18_20X_Hypoxia_Lung2.6_SOX9_HOPX_SFTPC_001.nd2	191	73.17	9.59
IH2	2019-12-18_20X_Hypoxia_Lung2.6_SOX9_HOPX_SFTPC_001.nd2	166	76.27	9.62
IH2	2019-12-18_20X_Hypoxia_Lung2.6_SOX9_HOPX_SFTPC_001.nd2	34	76.66	10.47
IH2	2019-12-18_20X_Hypoxia_Lung2.6_SOX9_HOPX_SFTPC_001.nd2	24	77.04	9.26
IH2	2019-12-18_20X_Hypoxia_Lung2.6_SOX9_HOPX_SFTPC_001.nd2	9	78.59	9.42
IH2	2019-12-18_20X_Hypoxia_Lung2.6_SOX9_HOPX_SFTPC_001.nd2	154	78.59	9.51
IH2	2019-12-18_20X_Hypoxia_Lung2.6_SOX9_HOPX_SFTPC_001.nd2	159	82.46	11.01
IH2	2019-12-18_20X_Hypoxia_Lung2.6_SOX9_HOPX_SFTPC_001.nd2	17	82.85	8.81
IH2	2019-12-18_20X_Hypoxia_Lung2.6_SOX9_HOPX_SFTPC_001.nd2	16	85.95	9.97
IH2	2019-12-18_20X_Hypoxia_Lung2.6_SOX9_HOPX_SFTPC_001.nd2	18	88.27	7.32
IH2	2019-12-18_20X_Hypoxia_Lung2.6_SOX9_HOPX_SFTPC_001.nd2	116	89.04	10.02
IH2	2019-12-18_20X_Hypoxia_Lung2.6_SOX9_HOPX_SFTPC_001.nd2	107	90.21	8.19
IH2	2019-12-18_20X_Hypoxia_Lung2.6_SOX9_HOPX_SFTPC_001.nd2	190	90.59	7.76
IH2	2019-12-18_20X_Hypoxia_Lung2.6_SOX9_HOPX_SFTPC_001.nd2	129	90.98	10.28
IH2	2019-12-18_20X_Hypoxia_Lung2.6_SOX9_HOPX_SFTPC_001.nd2	135	90.98	7.88
IH2	2019-12-18_20X_Hypoxia_Lung2.6_SOX9_HOPX_SFTPC_001.nd2	109	95.63	12.46
IH2	2019-12-18_20X_Hypoxia_Lung2.6_SOX9_HOPX_SFTPC_001.nd2	182	97.17	11.76
IH2	2019-12-18_20X_Hypoxia_Lung2.6_SOX9_HOPX_SFTPC_001.nd2	44	97.56	10.92
IH2	2019-12-18_20X_Hypoxia_Lung2.6_SOX9_HOPX_SFTPC_001.nd2	120	98.72	11.84
IH2	2019-12-18_20X_Hypoxia_Lung2.6_SOX9_HOPX_SFTPC_001.nd2	2	99.11	13.14
IH2	2019-12-18_20X_Hypoxia_Lung2.6_SOX9_HOPX_SFTPC_001.nd2	119	101.05	15.35
IH2	2019-12-18_20X_Hypoxia_Lung2.6_SOX9_HOPX_SFTPC_001.nd2	146	101.05	13.25
IH2	2019-12-18_20X_Hypoxia_Lung2.6_SOX9_HOPX_SFTPC_001.nd2	105	102.98	10.3
IH2	2019-12-18_20X_Hypoxia_Lung2.6_SOX9_HOPX_SFTPC_001.nd2	184	107.63	14.39
IH2	2019-12-18_20X_Hypoxia_Lung2.6_SOX9_HOPX_SFTPC_001.nd2	60	109.56	10.03
IH2	2019-12-18_20X_Hypoxia_Lung2.6_SOX9_HOPX_SFTPC_001.nd2	47	110.72	14.09
IH2	2019-12-18_20X_Hypoxia_Lung2.6_SOX9_HOPX_SFTPC_001.nd2	68	112.66	14.45
IH2	2019-12-18_20X_Hypoxia_Lung2.6_SOX9_HOPX_SFTPC_001.nd2	31	113.43	14.25
IH2	2019-12-18_20X_Hypoxia_Lung2.6_SOX9_HOPX_SFTPC_001.nd2	174	115.37	13.77
IH2	2019-12-18_20X_Hypoxia_Lung2.6_SOX9_HOPX_SFTPC_001.nd2	165	118.47	11.45
IH2	2019-12-18_20X_Hypoxia_Lung2.6_SOX9_HOPX_SFTPC_001.nd2	5	118.85	12.43
IH2	2019-12-18_20X_Hypoxia_Lung2.6_SOX9_HOPX_SFTPC_001.nd2	147	119.24	13.17
IH2	2019-12-18_20X_Hypoxia_Lung2.6_SOX9_HOPX_SFTPC_001.nd2	90	123.11	13.43
IH2	2019-12-18_20X_Hypoxia_Lung2.6_SOX9_HOPX_SFTPC_001.nd2	139	124.27	14.41
IH2	2019-12-18_20X_Hypoxia_Lung2.6_SOX9_HOPX_SFTPC_001.nd2	170	134.34	12.61
IH2	2019-12-18_20X_Hypoxia_Lung2.6_SOX9_HOPX_SFTPC_001.nd2	80	136.28	15.3
IH2	2019-12-18_20X_Hypoxia_Lung2.6_SOX9_HOPX_SFTPC_001.nd2	4	136.66	11.49
IH2	2019-12-18_20X_Hypoxia_Lung2.6_SOX9_HOPX_SFTPC_001.nd2	137	140.15	15.03
IH2	2019-12-18_20X_Hypoxia_Lung2.6_SOX9_HOPX_SFTPC_001.nd2	38	142.86	11.67
IH2	2019-12-18_20X_Hypoxia_Lung2.6_SOX9_HOPX_SFTPC_001.nd2	33	147.89	10.62
IH2	2019-12-18_20X_Hypoxia_Lung2.6_SOX9_HOPX_SFTPC_001.nd2	143	156.02	13.06
IH2	2019-12-18_20X_Hypoxia_Lung2.6_SOX9_HOPX_SFTPC_001.nd2	128	162.99	16.2
IH2	2019-12-18_20X_Hypoxia_Lung2.6_SOX9_HOPX_SFTPC_001.nd2	67	163.38	17.06
IH2	2019-12-18_20X_Hypoxia_Lung2.6_SOX9_HOPX_SFTPC_001.nd2	114	164.92	13.48
IH2	2019-12-18_20X_Hypoxia_Lung2.6_SOX9_HOPX_SFTPC_001.nd2	122	165.31	14.03
IH2	2019-12-18_20X_Hypoxia_Lung2.6_SOX9_HOPX_SFTPC_001.nd2	117	173.83	14.51
IH2	2019-12-18_20X_Hypoxia_Lung2.6_SOX9_HOPX_SFTPC_001.nd2	14	174.99	13.96
IH2	2019-12-18_20X_Hypoxia_Lung2.6_SOX9_HOPX_SFTPC_001.nd2	32	175.38	13.54
IH2	2019-12-18_20X_Hypoxia_Lung2.6_SOX9_HOPX_SFTPC_001.nd2	160	179.64	12.8
IH2	2019-12-18_20X_Hypoxia_Lung2.6_SOX9_HOPX_SFTPC_001.nd2	188	180.41	16.52
IH2	2019-12-18_20X_Hypoxia_Lung2.6_SOX9_HOPX_SFTPC_001.nd2	199	180.8	14.55
IH2	2019-12-18_20X_Hypoxia_Lung2.6_SOX9_HOPX_SFTPC_001.nd2	163	183.89	15.74
IH2	2019-12-18_20X_Hypoxia_Lung2.6_SOX9_HOPX_SFTPC_001.nd2	168	186.6	17.16
IH2	2019-12-18_20X_Hypoxia_Lung2.6_SOX9_HOPX_SFTPC_001.nd2	141	189.7	15.85
IH2	2019-12-18_20X_Hypoxia_Lung2.6_SOX9_HOPX_SFTPC_001.nd2	63	191.25	14.31
IH2	2019-12-18_20X_Hypoxia_Lung2.6_SOX9_HOPX_SFTPC_001.nd2	37	192.03	18.05
IH2	2019-12-18_20X_Hypoxia_Lung2.6_SOX9_HOPX_SFTPC_001.nd2	186	194.35	18.43
IH2	2019-12-18_20X_Hypoxia_Lung2.6_SOX9_HOPX_SFTPC_001.nd2	145	196.28	17.42
IH2	2019-12-18_20X_Hypoxia_Lung2.6_SOX9_HOPX_SFTPC_001.nd2	108	200.16	13.42
IH2	2019-12-18_20X_Hypoxia_Lung2.6_SOX9_HOPX_SFTPC_001.nd2	172	209.06	14.53
IH2	2019-12-18_20X_Hypoxia_Lung2.6_SOX9_HOPX_SFTPC_001.nd2	77	210.22	18.79
IH2	2019-12-18_20X_Hypoxia_Lung2.6_SOX9_HOPX_SFTPC_001.nd2	20	211.38	19.17
IH2	2019-12-18_20X_Hypoxia_Lung2.6_SOX9_HOPX_SFTPC_001.nd2	25	214.48	19.14
IH2	2019-12-18_20X_Hypoxia_Lung2.6_SOX9_HOPX_SFTPC_001.nd2	118	214.48	20.93
IH2	2019-12-18_20X_Hypoxia_Lung2.6_SOX9_HOPX_SFTPC_001.nd2	104	216.8	19.29
IH2	2019-12-18_20X_Hypoxia_Lung2.6_SOX9_HOPX_SFTPC_001.nd2	1	219.9	15.21
IH2	2019-12-18_20X_Hypoxia_Lung2.6_SOX9_HOPX_SFTPC_001.nd2	149	221.45	17.94
IH2	2019-12-18_20X_Hypoxia_Lung2.6_SOX9_HOPX_SFTPC_001.nd2	150	221.84	18.92
IH2	2019-12-18_20X_Hypoxia_Lung2.6_SOX9_HOPX_SFTPC_001.nd2	40	224.93	13.73
IH2	2019-12-18_20X_Hypoxia_Lung2.6_SOX9_HOPX_SFTPC_001.nd2	75	236.16	19.46
IH2	2019-12-18_20X_Hypoxia_Lung2.6_SOX9_HOPX_SFTPC_001.nd2	79	240.03	17.64
IH2	2019-12-18_20X_Hypoxia_Lung2.6_SOX9_HOPX_SFTPC_001.nd2	3	246.61	16.81
IH2	2019-12-18_20X_Hypoxia_Lung2.6_SOX9_HOPX_SFTPC_001.nd2	93	260.55	17.27
IH2	2019-12-18_20X_Hypoxia_Lung2.6_SOX9_HOPX_SFTPC_001.nd2	71	265.2	15.09
IH2	2019-12-18_20X_Hypoxia_Lung2.6_SOX9_HOPX_SFTPC_001.nd2	134	267.52	20.13
IH2	2019-12-18_20X_Hypoxia_Lung2.6_SOX9_HOPX_SFTPC_001.nd2	39	269.07	27.84
IH2	2019-12-18_20X_Hypoxia_Lung2.6_SOX9_HOPX_SFTPC_001.nd2	161	277.58	19.65
IH2	2019-12-18_20X_Hypoxia_Lung2.6_SOX9_HOPX_SFTPC_001.nd2	103	278.36	20.33
IH2	2019-12-18_20X_Hypoxia_Lung2.6_SOX9_HOPX_SFTPC_001.nd2	19	280.68	14.82
IH2	2019-12-18_20X_Hypoxia_Lung2.6_SOX9_HOPX_SFTPC_001.nd2	50	288.42	20.99
IH2	2019-12-18_20X_Hypoxia_Lung2.6_SOX9_HOPX_SFTPC_001.nd2	173	290.36	19.48
IH2	2019-12-18_20X_Hypoxia_Lung2.6_SOX9_HOPX_SFTPC_001.nd2	6	292.68	22.38
IH2	2019-12-18_20X_Hypoxia_Lung2.6_SOX9_HOPX_SFTPC_001.nd2	95	293.07	23.01
IH2	2019-12-18_20X_Hypoxia_Lung2.6_SOX9_HOPX_SFTPC_001.nd2	99	297.33	18.55
IH2	2019-12-18_20X_Hypoxia_Lung2.6_SOX9_HOPX_SFTPC_001.nd2	52	308.56	22.77
IH2	2019-12-18_20X_Hypoxia_Lung2.6_SOX9_HOPX_SFTPC_001.nd2	92	313.59	23.21
IH2	2019-12-18_20X_Hypoxia_Lung2.6_SOX9_HOPX_SFTPC_001.nd2	121	320.56	20.77
IH2	2019-12-18_20X_Hypoxia_Lung2.6_SOX9_HOPX_SFTPC_001.nd2	127	347.27	21.78
IH2	2019-12-18_20X_Hypoxia_Lung2.6_SOX9_HOPX_SFTPC_001.nd2	30	348.05	23.08
IH2	2019-12-18_20X_Hypoxia_Lung2.6_SOX9_HOPX_SFTPC_001.nd2	88	359.27	23.59
IH2	2019-12-18_20X_Hypoxia_Lung2.6_SOX9_HOPX_SFTPC_001.nd2	111	371.27	24.98
IH2	2019-12-18_20X_Hypoxia_Lung2.6_SOX9_HOPX_SFTPC_001.nd2	196	376.31	22.65
IH2	2019-12-18_20X_Hypoxia_Lung2.6_SOX9_HOPX_SFTPC_001.nd2	101	377.86	17.63
IH2	2019-12-18_20X_Hypoxia_Lung2.6_SOX9_HOPX_SFTPC_001.nd2	185	385.6	23.92
IH2	2019-12-18_20X_Hypoxia_Lung2.6_SOX9_HOPX_SFTPC_001.nd2	102	389.08	21.26
IH2	2019-12-18_20X_Hypoxia_Lung2.6_SOX9_HOPX_SFTPC_001.nd2	97	394.5	21.73
IH2	2019-12-18_20X_Hypoxia_Lung2.6_SOX9_HOPX_SFTPC_001.nd2	123	395.28	21.76
IH2	2019-12-18_20X_Hypoxia_Lung2.6_SOX9_HOPX_SFTPC_001.nd2	115	400.31	29.73
IH2	2019-12-18_20X_Hypoxia_Lung2.6_SOX9_HOPX_SFTPC_001.nd2	91	401.08	21.05
IH2	2019-12-18_20X_Hypoxia_Lung2.6_SOX9_HOPX_SFTPC_001.nd2	176	404.96	21.83
IH2	2019-12-18_20X_Hypoxia_Lung2.6_SOX9_HOPX_SFTPC_001.nd2	86	410.76	27.61
IH2	2019-12-18_20X_Hypoxia_Lung2.6_SOX9_HOPX_SFTPC_001.nd2	35	411.54	22.49
IH2	2019-12-18_20X_Hypoxia_Lung2.6_SOX9_HOPX_SFTPC_001.nd2	28	412.31	24.37
IH2	2019-12-18_20X_Hypoxia_Lung2.6_SOX9_HOPX_SFTPC_001.nd2	138	420.05	27.02
IH2	2019-12-18_20X_Hypoxia_Lung2.6_SOX9_HOPX_SFTPC_001.nd2	11	422.38	23.33
IH2	2019-12-18_20X_Hypoxia_Lung2.6_SOX9_HOPX_SFTPC_001.nd2	87	424.31	28
IH2	2019-12-18_20X_Hypoxia_Lung2.6_SOX9_HOPX_SFTPC_001.nd2	13	437.48	25.86
IH2	2019-12-18_20X_Hypoxia_Lung2.6_SOX9_HOPX_SFTPC_001.nd2	179	458.77	25.01
IH2	2019-12-18_20X_Hypoxia_Lung2.6_SOX9_HOPX_SFTPC_001.nd2	55	467.67	22.19
IH2	2019-12-18_20X_Hypoxia_Lung2.6_SOX9_HOPX_SFTPC_001.nd2	62	469.22	16.95
IH2	2019-12-18_20X_Hypoxia_Lung2.6_SOX9_HOPX_SFTPC_001.nd2	158	488.19	28.92
IH2	2019-12-18_20X_Hypoxia_Lung2.6_SOX9_HOPX_SFTPC_001.nd2	152	495.55	22.45
IH2	2019-12-18_20X_Hypoxia_Lung2.6_SOX9_HOPX_SFTPC_001.nd2	69	497.1	29.84
IH2	2019-12-18_20X_Hypoxia_Lung2.6_SOX9_HOPX_SFTPC_001.nd2	169	497.1	23.46
IH2	2019-12-18_20X_Hypoxia_Lung2.6_SOX9_HOPX_SFTPC_001.nd2	46	499.81	25.98
IH2	2019-12-18_20X_Hypoxia_Lung2.6_SOX9_HOPX_SFTPC_001.nd2	65	502.9	34.77
IH2	2019-12-18_20X_Hypoxia_Lung2.6_SOX9_HOPX_SFTPC_001.nd2	148	514.13	32.48
IH2	2019-12-18_20X_Hypoxia_Lung2.6_SOX9_HOPX_SFTPC_001.nd2	110	521.1	28.6
IH2	2019-12-18_20X_Hypoxia_Lung2.6_SOX9_HOPX_SFTPC_001.nd2	153	526.52	28.48
IH2	2019-12-18_20X_Hypoxia_Lung2.6_SOX9_HOPX_SFTPC_001.nd2	155	532.71	28.11
IH2	2019-12-18_20X_Hypoxia_Lung2.6_SOX9_HOPX_SFTPC_001.nd2	131	534.26	28.8
IH2	2019-12-18_20X_Hypoxia_Lung2.6_SOX9_HOPX_SFTPC_001.nd2	167	542.39	33.75
IH2	2019-12-18_20X_Hypoxia_Lung2.6_SOX9_HOPX_SFTPC_001.nd2	142	576.08	28.46
IH2	2019-12-18_20X_Hypoxia_Lung2.6_SOX9_HOPX_SFTPC_001.nd2	41	576.46	31.68
IH2	2019-12-18_20X_Hypoxia_Lung2.6_SOX9_HOPX_SFTPC_001.nd2	162	581.5	25.44
IH2	2019-12-18_20X_Hypoxia_Lung2.6_SOX9_HOPX_SFTPC_001.nd2	94	584.98	28.39
IH2	2019-12-18_20X_Hypoxia_Lung2.6_SOX9_HOPX_SFTPC_001.nd2	8	590.79	30.74
IH2	2019-12-18_20X_Hypoxia_Lung2.6_SOX9_HOPX_SFTPC_001.nd2	157	602.79	33.02
IH2	2019-12-18_20X_Hypoxia_Lung2.6_SOX9_HOPX_SFTPC_001.nd2	151	611.69	28.15
IH2	2019-12-18_20X_Hypoxia_Lung2.6_SOX9_HOPX_SFTPC_001.nd2	125	612.85	31.83
IH2	2019-12-18_20X_Hypoxia_Lung2.6_SOX9_HOPX_SFTPC_001.nd2	124	619.82	29.75
IH2	2019-12-18_20X_Hypoxia_Lung2.6_SOX9_HOPX_SFTPC_001.nd2	201	624.86	24.96
IH2	2019-12-18_20X_Hypoxia_Lung2.6_SOX9_HOPX_SFTPC_001.nd2	136	627.18	35.68
IH2	2019-12-18_20X_Hypoxia_Lung2.6_SOX9_HOPX_SFTPC_001.nd2	22	627.57	29.04
IH2	2019-12-18_20X_Hypoxia_Lung2.6_SOX9_HOPX_SFTPC_001.nd2	53	627.57	31.79
IH2	2019-12-18_20X_Hypoxia_Lung2.6_SOX9_HOPX_SFTPC_001.nd2	164	632.6	30.77
IH2	2019-12-18_20X_Hypoxia_Lung2.6_SOX9_HOPX_SFTPC_001.nd2	26	634.92	22.45
IH2	2019-12-18_20X_Hypoxia_Lung2.6_SOX9_HOPX_SFTPC_001.nd2	192	640.73	28.14
IH2	2019-12-18_20X_Hypoxia_Lung2.6_SOX9_HOPX_SFTPC_001.nd2	42	643.83	32.04
IH2	2019-12-18_20X_Hypoxia_Lung2.6_SOX9_HOPX_SFTPC_001.nd2	194	697.25	24.77
IH2	2019-12-18_20X_Hypoxia_Lung2.6_SOX9_HOPX_SFTPC_001.nd2	189	706.16	32.73
IH2	2019-12-18_20X_Hypoxia_Lung2.6_SOX9_HOPX_SFTPC_001.nd2	89	822.3	34.96
IH2	2019-12-18_20X_Hypoxia_Lung2.6_SOX9_HOPX_SFTPC_001.nd2	96	830.04	36.84
IH2	2019-12-18_20X_Hypoxia_Lung2.6_SOX9_HOPX_SFTPC_001.nd2	15	834.69	31.15
IH2	2019-12-18_20X_Hypoxia_Lung2.6_SOX9_HOPX_SFTPC_001.nd2	187	836.24	29.95
IH2	2019-12-18_20X_Hypoxia_Lung2.6_SOX9_HOPX_SFTPC_001.nd2	36	846.69	35.3
IH2	2019-12-18_20X_Hypoxia_Lung2.6_SOX9_HOPX_SFTPC_001.nd2	51	850.56	31.61
IH2	2019-12-18_20X_Hypoxia_Lung2.6_SOX9_HOPX_SFTPC_001.nd2	98	857.14	41.72
IH2	2019-12-18_20X_Hypoxia_Lung2.6_SOX9_HOPX_SFTPC_001.nd2	193	864.89	37.87
IH2	2019-12-18_20X_Hypoxia_Lung2.6_SOX9_HOPX_SFTPC_001.nd2	171	869.15	33.37
IH2	2019-12-18_20X_Hypoxia_Lung2.6_SOX9_HOPX_SFTPC_001.nd2	66	881.15	40.44
IH2	2019-12-18_20X_Hypoxia_Lung2.6_SOX9_HOPX_SFTPC_001.nd2	82	881.53	33.36
IH2	2019-12-18_20X_Hypoxia_Lung2.6_SOX9_HOPX_SFTPC_001.nd2	133	911.73	31.97
IH2	2019-12-18_20X_Hypoxia_Lung2.6_SOX9_HOPX_SFTPC_001.nd2	21	928.38	41.37
IH2	2019-12-18_20X_Hypoxia_Lung2.6_SOX9_HOPX_SFTPC_001.nd2	85	956.25	37.25
IH2	2019-12-18_20X_Hypoxia_Lung2.6_SOX9_HOPX_SFTPC_001.nd2	106	983.35	39.79
IH2	2019-12-18_20X_Hypoxia_Lung2.6_SOX9_HOPX_SFTPC_001.nd2	81	1033.3	36.4
IH2	2019-12-18_20X_Hypoxia_Lung2.6_SOX9_HOPX_SFTPC_001.nd2	72	1035.23	39.34
IH2	2019-12-18_20X_Hypoxia_Lung2.6_SOX9_HOPX_SFTPC_001.nd2	175	1038.33	41.39
IH2	2019-12-18_20X_Hypoxia_Lung2.6_SOX9_HOPX_SFTPC_001.nd2	177	1093.3	39.23
IH2	2019-12-18_20X_Hypoxia_Lung2.6_SOX9_HOPX_SFTPC_001.nd2	29	1188.93	38.19
IH2	2019-12-18_20X_Hypoxia_Lung2.6_SOX9_HOPX_SFTPC_001.nd2	180	1195.12	35.68
IH2	2019-12-18_20X_Hypoxia_Lung2.6_SOX9_HOPX_SFTPC_001.nd2	83	1198.61	45.59
IH2	2019-12-18_20X_Hypoxia_Lung2.6_SOX9_HOPX_SFTPC_001.nd2	181	1229.19	38.28
IH2	2019-12-18_20X_Hypoxia_Lung2.6_SOX9_HOPX_SFTPC_001.nd2	54	1253.97	37.99
IH2	2019-12-18_20X_Hypoxia_Lung2.6_SOX9_HOPX_SFTPC_001.nd2	126	1449.48	46.37
IH2	2019-12-18_20X_Hypoxia_Lung2.6_SOX9_HOPX_SFTPC_001.nd2	12	1455.29	41.35
IH2	2019-12-18_20X_Hypoxia_Lung2.6_SOX9_HOPX_SFTPC_001.nd2	144	1551.69	38.13
IH2	2019-12-18_20X_Hypoxia_Lung2.6_SOX9_HOPX_SFTPC_001.nd2	113	1751.07	37.55
IH2	2019-12-18_20X_Hypoxia_Lung2.6_SOX9_HOPX_SFTPC_001.nd2	27	1751.45	55.79
IH2	2019-12-18_20X_Hypoxia_Lung2.6_SOX9_HOPX_SFTPC_001.nd2	58	1787.46	49.33
IH2	2019-12-18_20X_Hypoxia_Lung2.6_SOX9_HOPX_SFTPC_001.nd2	100	1854.05	51.49
IH2	2019-12-18_20X_Hypoxia_Lung2.6_SOX9_HOPX_SFTPC_001.nd2	84	2325.59	58.56
IH2	2019-12-18_20X_Hypoxia_Lung2.6_SOX9_HOPX_SFTPC_002-MaxIP	200	50.72	8.11
IH2	2019-12-18_20X_Hypoxia_Lung2.6_SOX9_HOPX_SFTPC_002-MaxIP	21	51.1	5.64
IH2	2019-12-18_20X_Hypoxia_Lung2.6_SOX9_HOPX_SFTPC_002-MaxIP	90	53.81	9.69
IH2	2019-12-18_20X_Hypoxia_Lung2.6_SOX9_HOPX_SFTPC_002-MaxIP	134	53.81	8.22
IH2	2019-12-18_20X_Hypoxia_Lung2.6_SOX9_HOPX_SFTPC_002-MaxIP	88	54.2	8.78
IH2	2019-12-18_20X_Hypoxia_Lung2.6_SOX9_HOPX_SFTPC_002-MaxIP	73	54.97	10.02
IH2	2019-12-18_20X_Hypoxia_Lung2.6_SOX9_HOPX_SFTPC_002-MaxIP	9	56.14	6.52
IH2	2019-12-18_20X_Hypoxia_Lung2.6_SOX9_HOPX_SFTPC_002-MaxIP	159	58.07	5.97
IH2	2019-12-18_20X_Hypoxia_Lung2.6_SOX9_HOPX_SFTPC_002-MaxIP	185	58.46	7.01
IH2	2019-12-18_20X_Hypoxia_Lung2.6_SOX9_HOPX_SFTPC_002-MaxIP	231	58.46	7.88
IH2	2019-12-18_20X_Hypoxia_Lung2.6_SOX9_HOPX_SFTPC_002-MaxIP	197	60.39	7.11
IH2	2019-12-18_20X_Hypoxia_Lung2.6_SOX9_HOPX_SFTPC_002-MaxIP	53	61.56	8.45
IH2	2019-12-18_20X_Hypoxia_Lung2.6_SOX9_HOPX_SFTPC_002-MaxIP	63	61.56	11.9
IH2	2019-12-18_20X_Hypoxia_Lung2.6_SOX9_HOPX_SFTPC_002-MaxIP	190	62.33	10.36
IH2	2019-12-18_20X_Hypoxia_Lung2.6_SOX9_HOPX_SFTPC_002-MaxIP	40	63.88	9.45
IH2	2019-12-18_20X_Hypoxia_Lung2.6_SOX9_HOPX_SFTPC_002-MaxIP	58	64.65	9.19
IH2	2019-12-18_20X_Hypoxia_Lung2.6_SOX9_HOPX_SFTPC_002-MaxIP	199	64.65	9.28
IH2	2019-12-18_20X_Hypoxia_Lung2.6_SOX9_HOPX_SFTPC_002-MaxIP	125	66.98	7.36
IH2	2019-12-18_20X_Hypoxia_Lung2.6_SOX9_HOPX_SFTPC_002-MaxIP	186	67.75	7.14
IH2	2019-12-18_20X_Hypoxia_Lung2.6_SOX9_HOPX_SFTPC_002-MaxIP	189	67.75	9.6
IH2	2019-12-18_20X_Hypoxia_Lung2.6_SOX9_HOPX_SFTPC_002-MaxIP	169	69.3	9.82
IH2	2019-12-18_20X_Hypoxia_Lung2.6_SOX9_HOPX_SFTPC_002-MaxIP	248	71.24	10.06
IH2	2019-12-18_20X_Hypoxia_Lung2.6_SOX9_HOPX_SFTPC_002-MaxIP	247	72.01	7.24
IH2	2019-12-18_20X_Hypoxia_Lung2.6_SOX9_HOPX_SFTPC_002-MaxIP	116	73.56	11.33
IH2	2019-12-18_20X_Hypoxia_Lung2.6_SOX9_HOPX_SFTPC_002-MaxIP	212	74.33	9.42
IH2	2019-12-18_20X_Hypoxia_Lung2.6_SOX9_HOPX_SFTPC_002-MaxIP	140	76.27	8.44
IH2	2019-12-18_20X_Hypoxia_Lung2.6_SOX9_HOPX_SFTPC_002-MaxIP	50	78.98	9.45
IH2	2019-12-18_20X_Hypoxia_Lung2.6_SOX9_HOPX_SFTPC_002-MaxIP	31	79.75	9.62
IH2	2019-12-18_20X_Hypoxia_Lung2.6_SOX9_HOPX_SFTPC_002-MaxIP	245	80.53	11.36
IH2	2019-12-18_20X_Hypoxia_Lung2.6_SOX9_HOPX_SFTPC_002-MaxIP	122	80.91	10.2
IH2	2019-12-18_20X_Hypoxia_Lung2.6_SOX9_HOPX_SFTPC_002-MaxIP	150	82.08	10.45
IH2	2019-12-18_20X_Hypoxia_Lung2.6_SOX9_HOPX_SFTPC_002-MaxIP	115	82.85	8.92
IH2	2019-12-18_20X_Hypoxia_Lung2.6_SOX9_HOPX_SFTPC_002-MaxIP	47	83.24	10.45
IH2	2019-12-18_20X_Hypoxia_Lung2.6_SOX9_HOPX_SFTPC_002-MaxIP	155	83.24	7.93
IH2	2019-12-18_20X_Hypoxia_Lung2.6_SOX9_HOPX_SFTPC_002-MaxIP	204	84.79	9.39
IH2	2019-12-18_20X_Hypoxia_Lung2.6_SOX9_HOPX_SFTPC_002-MaxIP	97	85.95	9.46
IH2	2019-12-18_20X_Hypoxia_Lung2.6_SOX9_HOPX_SFTPC_002-MaxIP	234	85.95	13.21
IH2	2019-12-18_20X_Hypoxia_Lung2.6_SOX9_HOPX_SFTPC_002-MaxIP	75	86.33	11.63
IH2	2019-12-18_20X_Hypoxia_Lung2.6_SOX9_HOPX_SFTPC_002-MaxIP	232	86.72	8.58
IH2	2019-12-18_20X_Hypoxia_Lung2.6_SOX9_HOPX_SFTPC_002-MaxIP	178	88.27	9.95
IH2	2019-12-18_20X_Hypoxia_Lung2.6_SOX9_HOPX_SFTPC_002-MaxIP	152	90.98	11.34
IH2	2019-12-18_20X_Hypoxia_Lung2.6_SOX9_HOPX_SFTPC_002-MaxIP	87	92.14	9.06
IH2	2019-12-18_20X_Hypoxia_Lung2.6_SOX9_HOPX_SFTPC_002-MaxIP	156	93.69	11.36
IH2	2019-12-18_20X_Hypoxia_Lung2.6_SOX9_HOPX_SFTPC_002-MaxIP	213	94.46	10.71
IH2	2019-12-18_20X_Hypoxia_Lung2.6_SOX9_HOPX_SFTPC_002-MaxIP	138	95.63	11.36
IH2	2019-12-18_20X_Hypoxia_Lung2.6_SOX9_HOPX_SFTPC_002-MaxIP	26	97.56	9.9
IH2	2019-12-18_20X_Hypoxia_Lung2.6_SOX9_HOPX_SFTPC_002-MaxIP	2	98.72	10.33
IH2	2019-12-18_20X_Hypoxia_Lung2.6_SOX9_HOPX_SFTPC_002-MaxIP	77	98.72	9.09
IH2	2019-12-18_20X_Hypoxia_Lung2.6_SOX9_HOPX_SFTPC_002-MaxIP	23	100.66	15.09
IH2	2019-12-18_20X_Hypoxia_Lung2.6_SOX9_HOPX_SFTPC_002-MaxIP	223	100.66	11.47
IH2	2019-12-18_20X_Hypoxia_Lung2.6_SOX9_HOPX_SFTPC_002-MaxIP	18	102.59	13.88
IH2	2019-12-18_20X_Hypoxia_Lung2.6_SOX9_HOPX_SFTPC_002-MaxIP	188	104.53	10.03
IH2	2019-12-18_20X_Hypoxia_Lung2.6_SOX9_HOPX_SFTPC_002-MaxIP	161	105.3	11.77
IH2	2019-12-18_20X_Hypoxia_Lung2.6_SOX9_HOPX_SFTPC_002-MaxIP	151	106.85	10.65
IH2	2019-12-18_20X_Hypoxia_Lung2.6_SOX9_HOPX_SFTPC_002-MaxIP	142	107.24	8.6
IH2	2019-12-18_20X_Hypoxia_Lung2.6_SOX9_HOPX_SFTPC_002-MaxIP	238	107.24	9.2
IH2	2019-12-18_20X_Hypoxia_Lung2.6_SOX9_HOPX_SFTPC_002-MaxIP	246	109.95	12.58
IH2	2019-12-18_20X_Hypoxia_Lung2.6_SOX9_HOPX_SFTPC_002-MaxIP	120	111.5	11.88
IH2	2019-12-18_20X_Hypoxia_Lung2.6_SOX9_HOPX_SFTPC_002-MaxIP	163	111.5	12.96
IH2	2019-12-18_20X_Hypoxia_Lung2.6_SOX9_HOPX_SFTPC_002-MaxIP	71	112.27	15.28
IH2	2019-12-18_20X_Hypoxia_Lung2.6_SOX9_HOPX_SFTPC_002-MaxIP	111	115.76	11.01
IH2	2019-12-18_20X_Hypoxia_Lung2.6_SOX9_HOPX_SFTPC_002-MaxIP	141	115.76	12.56
IH2	2019-12-18_20X_Hypoxia_Lung2.6_SOX9_HOPX_SFTPC_002-MaxIP	29	119.24	11.68
IH2	2019-12-18_20X_Hypoxia_Lung2.6_SOX9_HOPX_SFTPC_002-MaxIP	218	120.4	14.05
IH2	2019-12-18_20X_Hypoxia_Lung2.6_SOX9_HOPX_SFTPC_002-MaxIP	137	124.27	12.01
IH2	2019-12-18_20X_Hypoxia_Lung2.6_SOX9_HOPX_SFTPC_002-MaxIP	177	125.05	12.37
IH2	2019-12-18_20X_Hypoxia_Lung2.6_SOX9_HOPX_SFTPC_002-MaxIP	222	128.15	13.96
IH2	2019-12-18_20X_Hypoxia_Lung2.6_SOX9_HOPX_SFTPC_002-MaxIP	146	128.53	12.61
IH2	2019-12-18_20X_Hypoxia_Lung2.6_SOX9_HOPX_SFTPC_002-MaxIP	149	129.31	16.1
IH2	2019-12-18_20X_Hypoxia_Lung2.6_SOX9_HOPX_SFTPC_002-MaxIP	48	130.08	14.46
IH2	2019-12-18_20X_Hypoxia_Lung2.6_SOX9_HOPX_SFTPC_002-MaxIP	250	130.86	12.57
IH2	2019-12-18_20X_Hypoxia_Lung2.6_SOX9_HOPX_SFTPC_002-MaxIP	124	133.18	11.36
IH2	2019-12-18_20X_Hypoxia_Lung2.6_SOX9_HOPX_SFTPC_002-MaxIP	79	135.89	11.84
IH2	2019-12-18_20X_Hypoxia_Lung2.6_SOX9_HOPX_SFTPC_002-MaxIP	130	137.44	13.18
IH2	2019-12-18_20X_Hypoxia_Lung2.6_SOX9_HOPX_SFTPC_002-MaxIP	217	137.44	11.53
IH2	2019-12-18_20X_Hypoxia_Lung2.6_SOX9_HOPX_SFTPC_002-MaxIP	225	137.44	11.18
IH2	2019-12-18_20X_Hypoxia_Lung2.6_SOX9_HOPX_SFTPC_002-MaxIP	205	140.92	17.35
IH2	2019-12-18_20X_Hypoxia_Lung2.6_SOX9_HOPX_SFTPC_002-MaxIP	249	141.7	14.95
IH2	2019-12-18_20X_Hypoxia_Lung2.6_SOX9_HOPX_SFTPC_002-MaxIP	83	143.63	11.46
IH2	2019-12-18_20X_Hypoxia_Lung2.6_SOX9_HOPX_SFTPC_002-MaxIP	16	148.66	14.31
IH2	2019-12-18_20X_Hypoxia_Lung2.6_SOX9_HOPX_SFTPC_002-MaxIP	179	148.66	12.26
IH2	2019-12-18_20X_Hypoxia_Lung2.6_SOX9_HOPX_SFTPC_002-MaxIP	98	150.21	15.88
IH2	2019-12-18_20X_Hypoxia_Lung2.6_SOX9_HOPX_SFTPC_002-MaxIP	170	154.08	15.87
IH2	2019-12-18_20X_Hypoxia_Lung2.6_SOX9_HOPX_SFTPC_002-MaxIP	4	154.86	10.24
IH2	2019-12-18_20X_Hypoxia_Lung2.6_SOX9_HOPX_SFTPC_002-MaxIP	66	155.25	12.72
IH2	2019-12-18_20X_Hypoxia_Lung2.6_SOX9_HOPX_SFTPC_002-MaxIP	38	158.34	14.94
IH2	2019-12-18_20X_Hypoxia_Lung2.6_SOX9_HOPX_SFTPC_002-MaxIP	10	159.89	8.65
IH2	2019-12-18_20X_Hypoxia_Lung2.6_SOX9_HOPX_SFTPC_002-MaxIP	118	161.44	14.28
IH2	2019-12-18_20X_Hypoxia_Lung2.6_SOX9_HOPX_SFTPC_002-MaxIP	242	162.99	14.61
IH2	2019-12-18_20X_Hypoxia_Lung2.6_SOX9_HOPX_SFTPC_002-MaxIP	54	166.47	18.32
IH2	2019-12-18_20X_Hypoxia_Lung2.6_SOX9_HOPX_SFTPC_002-MaxIP	59	166.86	13.45
IH2	2019-12-18_20X_Hypoxia_Lung2.6_SOX9_HOPX_SFTPC_002-MaxIP	119	170.34	16.43
IH2	2019-12-18_20X_Hypoxia_Lung2.6_SOX9_HOPX_SFTPC_002-MaxIP	239	173.05	13.32
IH2	2019-12-18_20X_Hypoxia_Lung2.6_SOX9_HOPX_SFTPC_002-MaxIP	220	173.44	15.45
IH2	2019-12-18_20X_Hypoxia_Lung2.6_SOX9_HOPX_SFTPC_002-MaxIP	56	174.22	15.02
IH2	2019-12-18_20X_Hypoxia_Lung2.6_SOX9_HOPX_SFTPC_002-MaxIP	57	174.22	14.79
IH2	2019-12-18_20X_Hypoxia_Lung2.6_SOX9_HOPX_SFTPC_002-MaxIP	191	174.22	15.55
IH2	2019-12-18_20X_Hypoxia_Lung2.6_SOX9_HOPX_SFTPC_002-MaxIP	195	174.99	15.8
IH2	2019-12-18_20X_Hypoxia_Lung2.6_SOX9_HOPX_SFTPC_002-MaxIP	187	177.7	12.56
IH2	2019-12-18_20X_Hypoxia_Lung2.6_SOX9_HOPX_SFTPC_002-MaxIP	145	181.18	14.05
IH2	2019-12-18_20X_Hypoxia_Lung2.6_SOX9_HOPX_SFTPC_002-MaxIP	162	183.51	13.04
IH2	2019-12-18_20X_Hypoxia_Lung2.6_SOX9_HOPX_SFTPC_002-MaxIP	65	184.28	17.46
IH2	2019-12-18_20X_Hypoxia_Lung2.6_SOX9_HOPX_SFTPC_002-MaxIP	5	185.06	16.35
IH2	2019-12-18_20X_Hypoxia_Lung2.6_SOX9_HOPX_SFTPC_002-MaxIP	37	190.09	16.25
IH2	2019-12-18_20X_Hypoxia_Lung2.6_SOX9_HOPX_SFTPC_002-MaxIP	74	191.64	15.53
IH2	2019-12-18_20X_Hypoxia_Lung2.6_SOX9_HOPX_SFTPC_002-MaxIP	184	193.57	12.47
IH2	2019-12-18_20X_Hypoxia_Lung2.6_SOX9_HOPX_SFTPC_002-MaxIP	1	195.12	9.74
IH2	2019-12-18_20X_Hypoxia_Lung2.6_SOX9_HOPX_SFTPC_002-MaxIP	96	195.9	15.9
IH2	2019-12-18_20X_Hypoxia_Lung2.6_SOX9_HOPX_SFTPC_002-MaxIP	86	198.22	19.27
IH2	2019-12-18_20X_Hypoxia_Lung2.6_SOX9_HOPX_SFTPC_002-MaxIP	233	198.99	15.24
IH2	2019-12-18_20X_Hypoxia_Lung2.6_SOX9_HOPX_SFTPC_002-MaxIP	123	199.77	12.91
IH2	2019-12-18_20X_Hypoxia_Lung2.6_SOX9_HOPX_SFTPC_002-MaxIP	33	202.09	18.97
IH2	2019-12-18_20X_Hypoxia_Lung2.6_SOX9_HOPX_SFTPC_002-MaxIP	117	202.09	20.34
IH2	2019-12-18_20X_Hypoxia_Lung2.6_SOX9_HOPX_SFTPC_002-MaxIP	127	203.25	17.76
IH2	2019-12-18_20X_Hypoxia_Lung2.6_SOX9_HOPX_SFTPC_002-MaxIP	20	204.41	15.66
IH2	2019-12-18_20X_Hypoxia_Lung2.6_SOX9_HOPX_SFTPC_002-MaxIP	94	205.96	15.1
IH2	2019-12-18_20X_Hypoxia_Lung2.6_SOX9_HOPX_SFTPC_002-MaxIP	46	216.42	21.76
IH2	2019-12-18_20X_Hypoxia_Lung2.6_SOX9_HOPX_SFTPC_002-MaxIP	226	217.58	14.52
IH2	2019-12-18_20X_Hypoxia_Lung2.6_SOX9_HOPX_SFTPC_002-MaxIP	3	217.96	22.01
IH2	2019-12-18_20X_Hypoxia_Lung2.6_SOX9_HOPX_SFTPC_002-MaxIP	95	217.96	15.41
IH2	2019-12-18_20X_Hypoxia_Lung2.6_SOX9_HOPX_SFTPC_002-MaxIP	28	219.51	18.9
IH2	2019-12-18_20X_Hypoxia_Lung2.6_SOX9_HOPX_SFTPC_002-MaxIP	70	222.22	14.75
IH2	2019-12-18_20X_Hypoxia_Lung2.6_SOX9_HOPX_SFTPC_002-MaxIP	136	222.61	11.3
IH2	2019-12-18_20X_Hypoxia_Lung2.6_SOX9_HOPX_SFTPC_002-MaxIP	182	225.71	13.09
IH2	2019-12-18_20X_Hypoxia_Lung2.6_SOX9_HOPX_SFTPC_002-MaxIP	82	226.87	15.91
IH2	2019-12-18_20X_Hypoxia_Lung2.6_SOX9_HOPX_SFTPC_002-MaxIP	144	226.87	12.41
IH2	2019-12-18_20X_Hypoxia_Lung2.6_SOX9_HOPX_SFTPC_002-MaxIP	60	229.19	19.12
IH2	2019-12-18_20X_Hypoxia_Lung2.6_SOX9_HOPX_SFTPC_002-MaxIP	72	229.19	17.16
IH2	2019-12-18_20X_Hypoxia_Lung2.6_SOX9_HOPX_SFTPC_002-MaxIP	39	235.39	18.44
IH2	2019-12-18_20X_Hypoxia_Lung2.6_SOX9_HOPX_SFTPC_002-MaxIP	22	236.16	13.06
IH2	2019-12-18_20X_Hypoxia_Lung2.6_SOX9_HOPX_SFTPC_002-MaxIP	45	238.1	18.14
IH2	2019-12-18_20X_Hypoxia_Lung2.6_SOX9_HOPX_SFTPC_002-MaxIP	183	238.87	14.69
IH2	2019-12-18_20X_Hypoxia_Lung2.6_SOX9_HOPX_SFTPC_002-MaxIP	103	252.03	20.68
IH2	2019-12-18_20X_Hypoxia_Lung2.6_SOX9_HOPX_SFTPC_002-MaxIP	32	252.42	15.92
IH2	2019-12-18_20X_Hypoxia_Lung2.6_SOX9_HOPX_SFTPC_002-MaxIP	67	259	20.01
IH2	2019-12-18_20X_Hypoxia_Lung2.6_SOX9_HOPX_SFTPC_002-MaxIP	228	266.36	19.62
IH2	2019-12-18_20X_Hypoxia_Lung2.6_SOX9_HOPX_SFTPC_002-MaxIP	24	271.39	23.38
IH2	2019-12-18_20X_Hypoxia_Lung2.6_SOX9_HOPX_SFTPC_002-MaxIP	106	271.78	15.08
IH2	2019-12-18_20X_Hypoxia_Lung2.6_SOX9_HOPX_SFTPC_002-MaxIP	51	272.16	18.43
IH2	2019-12-18_20X_Hypoxia_Lung2.6_SOX9_HOPX_SFTPC_002-MaxIP	93	273.33	18.44
IH2	2019-12-18_20X_Hypoxia_Lung2.6_SOX9_HOPX_SFTPC_002-MaxIP	34	274.49	16.5
IH2	2019-12-18_20X_Hypoxia_Lung2.6_SOX9_HOPX_SFTPC_002-MaxIP	139	278.36	17.56
IH2	2019-12-18_20X_Hypoxia_Lung2.6_SOX9_HOPX_SFTPC_002-MaxIP	201	283.78	17.91
IH2	2019-12-18_20X_Hypoxia_Lung2.6_SOX9_HOPX_SFTPC_002-MaxIP	135	286.49	16.33
IH2	2019-12-18_20X_Hypoxia_Lung2.6_SOX9_HOPX_SFTPC_002-MaxIP	19	292.68	18.3
IH2	2019-12-18_20X_Hypoxia_Lung2.6_SOX9_HOPX_SFTPC_002-MaxIP	27	294.23	18.96
IH2	2019-12-18_20X_Hypoxia_Lung2.6_SOX9_HOPX_SFTPC_002-MaxIP	160	294.62	16.88
IH2	2019-12-18_20X_Hypoxia_Lung2.6_SOX9_HOPX_SFTPC_002-MaxIP	35	297.72	18.9
IH2	2019-12-18_20X_Hypoxia_Lung2.6_SOX9_HOPX_SFTPC_002-MaxIP	61	300.04	19.55
IH2	2019-12-18_20X_Hypoxia_Lung2.6_SOX9_HOPX_SFTPC_002-MaxIP	101	300.43	23.38
IH2	2019-12-18_20X_Hypoxia_Lung2.6_SOX9_HOPX_SFTPC_002-MaxIP	12	308.56	20.32
IH2	2019-12-18_20X_Hypoxia_Lung2.6_SOX9_HOPX_SFTPC_002-MaxIP	236	310.88	25.23
IH2	2019-12-18_20X_Hypoxia_Lung2.6_SOX9_HOPX_SFTPC_002-MaxIP	164	318.62	17.17
IH2	2019-12-18_20X_Hypoxia_Lung2.6_SOX9_HOPX_SFTPC_002-MaxIP	92	319.01	17.36
IH2	2019-12-18_20X_Hypoxia_Lung2.6_SOX9_HOPX_SFTPC_002-MaxIP	6	330.24	23.34
IH2	2019-12-18_20X_Hypoxia_Lung2.6_SOX9_HOPX_SFTPC_002-MaxIP	180	332.95	21.79
IH2	2019-12-18_20X_Hypoxia_Lung2.6_SOX9_HOPX_SFTPC_002-MaxIP	235	338.37	21.06
IH2	2019-12-18_20X_Hypoxia_Lung2.6_SOX9_HOPX_SFTPC_002-MaxIP	181	349.59	22.06
IH2	2019-12-18_20X_Hypoxia_Lung2.6_SOX9_HOPX_SFTPC_002-MaxIP	113	351.92	26.46
IH2	2019-12-18_20X_Hypoxia_Lung2.6_SOX9_HOPX_SFTPC_002-MaxIP	84	355.01	21.9
IH2	2019-12-18_20X_Hypoxia_Lung2.6_SOX9_HOPX_SFTPC_002-MaxIP	68	356.18	20.93
IH2	2019-12-18_20X_Hypoxia_Lung2.6_SOX9_HOPX_SFTPC_002-MaxIP	244	363.53	21.59
IH2	2019-12-18_20X_Hypoxia_Lung2.6_SOX9_HOPX_SFTPC_002-MaxIP	173	380.18	24.19
IH2	2019-12-18_20X_Hypoxia_Lung2.6_SOX9_HOPX_SFTPC_002-MaxIP	209	382.11	18.7
IH2	2019-12-18_20X_Hypoxia_Lung2.6_SOX9_HOPX_SFTPC_002-MaxIP	214	384.82	25.58
IH2	2019-12-18_20X_Hypoxia_Lung2.6_SOX9_HOPX_SFTPC_002-MaxIP	8	394.12	21.14
IH2	2019-12-18_20X_Hypoxia_Lung2.6_SOX9_HOPX_SFTPC_002-MaxIP	100	406.5	24.39
IH2	2019-12-18_20X_Hypoxia_Lung2.6_SOX9_HOPX_SFTPC_002-MaxIP	229	407.28	26.58
IH2	2019-12-18_20X_Hypoxia_Lung2.6_SOX9_HOPX_SFTPC_002-MaxIP	91	414.63	20.65
IH2	2019-12-18_20X_Hypoxia_Lung2.6_SOX9_HOPX_SFTPC_002-MaxIP	194	421.22	23.15
IH2	2019-12-18_20X_Hypoxia_Lung2.6_SOX9_HOPX_SFTPC_002-MaxIP	36	440.57	19.51
IH2	2019-12-18_20X_Hypoxia_Lung2.6_SOX9_HOPX_SFTPC_002-MaxIP	193	460.32	25.34
IH2	2019-12-18_20X_Hypoxia_Lung2.6_SOX9_HOPX_SFTPC_002-MaxIP	121	461.87	18.48
IH2	2019-12-18_20X_Hypoxia_Lung2.6_SOX9_HOPX_SFTPC_002-MaxIP	49	464.58	26.92
IH2	2019-12-18_20X_Hypoxia_Lung2.6_SOX9_HOPX_SFTPC_002-MaxIP	17	473.09	23.4
IH2	2019-12-18_20X_Hypoxia_Lung2.6_SOX9_HOPX_SFTPC_002-MaxIP	105	501.74	26.8
IH2	2019-12-18_20X_Hypoxia_Lung2.6_SOX9_HOPX_SFTPC_002-MaxIP	109	519.55	18.08
IH2	2019-12-18_20X_Hypoxia_Lung2.6_SOX9_HOPX_SFTPC_002-MaxIP	148	529.62	33.49
IH2	2019-12-18_20X_Hypoxia_Lung2.6_SOX9_HOPX_SFTPC_002-MaxIP	7	543.94	23.18
IH2	2019-12-18_20X_Hypoxia_Lung2.6_SOX9_HOPX_SFTPC_002-MaxIP	165	547.43	28.94
IH2	2019-12-18_20X_Hypoxia_Lung2.6_SOX9_HOPX_SFTPC_002-MaxIP	110	550.14	29.7
IH2	2019-12-18_20X_Hypoxia_Lung2.6_SOX9_HOPX_SFTPC_002-MaxIP	196	619.82	25.81
IH2	2019-12-18_20X_Hypoxia_Lung2.6_SOX9_HOPX_SFTPC_002-MaxIP	41	633.37	20.72
IH2	2019-12-18_20X_Hypoxia_Lung2.6_SOX9_HOPX_SFTPC_002-MaxIP	207	635.7	28.95
IH2	2019-12-18_20X_Hypoxia_Lung2.6_SOX9_HOPX_SFTPC_002-MaxIP	99	674.41	40.62
IH2	2019-12-18_20X_Hypoxia_Lung2.6_SOX9_HOPX_SFTPC_002-MaxIP	230	674.8	33.78
IH2	2019-12-18_20X_Hypoxia_Lung2.6_SOX9_HOPX_SFTPC_002-MaxIP	147	686.02	29.75
IH2	2019-12-18_20X_Hypoxia_Lung2.6_SOX9_HOPX_SFTPC_002-MaxIP	176	710.8	40.23
IH2	2019-12-18_20X_Hypoxia_Lung2.6_SOX9_HOPX_SFTPC_002-MaxIP	69	719.71	40.16
IH2	2019-12-18_20X_Hypoxia_Lung2.6_SOX9_HOPX_SFTPC_002-MaxIP	172	720.09	33.86
IH2	2019-12-18_20X_Hypoxia_Lung2.6_SOX9_HOPX_SFTPC_002-MaxIP	129	739.06	26.55
IH2	2019-12-18_20X_Hypoxia_Lung2.6_SOX9_HOPX_SFTPC_002-MaxIP	208	846.3	31.82
IH2	2019-12-18_20X_Hypoxia_Lung2.6_SOX9_HOPX_SFTPC_002-MaxIP	227	878.05	33.49
IH2	2019-12-18_20X_Hypoxia_Lung2.6_SOX9_HOPX_SFTPC_002-MaxIP	85	902.83	37.67
IH2	2019-12-18_20X_Hypoxia_Lung2.6_SOX9_HOPX_SFTPC_002-MaxIP	114	926.06	43.14
IH2	2019-12-18_20X_Hypoxia_Lung2.6_SOX9_HOPX_SFTPC_002-MaxIP	112	934.57	33.27
IH2	2019-12-18_20X_Hypoxia_Lung2.6_SOX9_HOPX_SFTPC_002-MaxIP	154	938.06	40.55
IH2	2019-12-18_20X_Hypoxia_Lung2.6_SOX9_HOPX_SFTPC_002-MaxIP	157	1184.28	43.19
IH2	2019-12-18_20X_Hypoxia_Lung2.6_SOX9_HOPX_SFTPC_002-MaxIP	175	1273.33	53.27
IH2	2019-12-18_20X_Hypoxia_Lung2.6_SOX9_HOPX_SFTPC_002-MaxIP	211	1294.23	40.64
IH2	2019-12-18_20X_Hypoxia_Lung2.6_SOX9_HOPX_SFTPC_002-MaxIP	131	1373.6	43.22
IH2	2019-12-18_20X_Hypoxia_Lung2.6_SOX9_HOPX_SFTPC_002-MaxIP	52	1589.24	49.31
IH2	2019-12-18_20X_Hypoxia_Lung2.6_SOX9_HOPX_SFTPC_002-MaxIP	158	1607.05	55.69
IH2	2019-12-18_20X_Hypoxia_Lung2.6_SOX9_HOPX_SFTPC_002-MaxIP	167	1617.89	41.1
IH2	2019-12-18_20X_Hypoxia_Lung2.6_SOX9_HOPX_SFTPC_002-MaxIP	81	1619.05	53.76
IH2	2019-12-18_20X_Hypoxia_Lung2.6_SOX9_HOPX_SFTPC_002-MaxIP	108	1672.48	53.33
IH2	2019-12-18_20X_Hypoxia_Lung2.6_SOX9_HOPX_SFTPC_002-MaxIP	171	1685.64	37.22
IH2	2019-12-18_20X_Hypoxia_Lung2.6_SOX9_HOPX_SFTPC_002-MaxIP	168	1951.22	50.09
IH2	2019-12-18_20X_Hypoxia_Lung2.6_SOX9_HOPX_SFTPC_002-MaxIP	44	2306.24	58.61
IH2	2019-12-18_20X_Hypoxia_Lung2.6_SOX9_HOPX_SFTPC_002-MaxIP	202	3107.24	67.45
IH2	2019-12-18_20X_Hypoxia_Lung2.6_SOX9_HOPX_SFTPC_003-MaxIP	115	52.26	8.94
IH2	2019-12-18_20X_Hypoxia_Lung2.6_SOX9_HOPX_SFTPC_003-MaxIP	366	52.26	9.32
IH2	2019-12-18_20X_Hypoxia_Lung2.6_SOX9_HOPX_SFTPC_003-MaxIP	458	52.26	6.62
IH2	2019-12-18_20X_Hypoxia_Lung2.6_SOX9_HOPX_SFTPC_003-MaxIP	521	53.43	7.32
IH2	2019-12-18_20X_Hypoxia_Lung2.6_SOX9_HOPX_SFTPC_003-MaxIP	318	54.2	9.12
IH2	2019-12-18_20X_Hypoxia_Lung2.6_SOX9_HOPX_SFTPC_003-MaxIP	327	54.97	7.14
IH2	2019-12-18_20X_Hypoxia_Lung2.6_SOX9_HOPX_SFTPC_003-MaxIP	413	55.75	8.02
IH2	2019-12-18_20X_Hypoxia_Lung2.6_SOX9_HOPX_SFTPC_003-MaxIP	293	56.14	7.23
IH2	2019-12-18_20X_Hypoxia_Lung2.6_SOX9_HOPX_SFTPC_003-MaxIP	326	56.52	8.66
IH2	2019-12-18_20X_Hypoxia_Lung2.6_SOX9_HOPX_SFTPC_003-MaxIP	415	56.52	8.38
IH2	2019-12-18_20X_Hypoxia_Lung2.6_SOX9_HOPX_SFTPC_003-MaxIP	296	56.91	8.98
IH2	2019-12-18_20X_Hypoxia_Lung2.6_SOX9_HOPX_SFTPC_003-MaxIP	67	58.85	8.27
IH2	2019-12-18_20X_Hypoxia_Lung2.6_SOX9_HOPX_SFTPC_003-MaxIP	388	60.01	8.71
IH2	2019-12-18_20X_Hypoxia_Lung2.6_SOX9_HOPX_SFTPC_003-MaxIP	43	61.17	7.94
IH2	2019-12-18_20X_Hypoxia_Lung2.6_SOX9_HOPX_SFTPC_003-MaxIP	335	61.17	10.21
IH2	2019-12-18_20X_Hypoxia_Lung2.6_SOX9_HOPX_SFTPC_003-MaxIP	71	63.49	8.23
IH2	2019-12-18_20X_Hypoxia_Lung2.6_SOX9_HOPX_SFTPC_003-MaxIP	216	64.65	9.9
IH2	2019-12-18_20X_Hypoxia_Lung2.6_SOX9_HOPX_SFTPC_003-MaxIP	125	67.75	10.34
IH2	2019-12-18_20X_Hypoxia_Lung2.6_SOX9_HOPX_SFTPC_003-MaxIP	247	68.91	8.01
IH2	2019-12-18_20X_Hypoxia_Lung2.6_SOX9_HOPX_SFTPC_003-MaxIP	456	68.91	8.83
IH2	2019-12-18_20X_Hypoxia_Lung2.6_SOX9_HOPX_SFTPC_003-MaxIP	155	71.24	8.37
IH2	2019-12-18_20X_Hypoxia_Lung2.6_SOX9_HOPX_SFTPC_003-MaxIP	260	73.17	7.57
IH2	2019-12-18_20X_Hypoxia_Lung2.6_SOX9_HOPX_SFTPC_003-MaxIP	114	73.56	8.66
IH2	2019-12-18_20X_Hypoxia_Lung2.6_SOX9_HOPX_SFTPC_003-MaxIP	223	77.04	12.99
IH2	2019-12-18_20X_Hypoxia_Lung2.6_SOX9_HOPX_SFTPC_003-MaxIP	270	80.91	10.85
IH2	2019-12-18_20X_Hypoxia_Lung2.6_SOX9_HOPX_SFTPC_003-MaxIP	251	85.56	8.11
IH2	2019-12-18_20X_Hypoxia_Lung2.6_SOX9_HOPX_SFTPC_003-MaxIP	344	86.72	9.68
IH2	2019-12-18_20X_Hypoxia_Lung2.6_SOX9_HOPX_SFTPC_003-MaxIP	253	90.59	12.59
IH2	2019-12-18_20X_Hypoxia_Lung2.6_SOX9_HOPX_SFTPC_003-MaxIP	285	90.98	12.35
IH2	2019-12-18_20X_Hypoxia_Lung2.6_SOX9_HOPX_SFTPC_003-MaxIP	310	96.01	9.69
IH2	2019-12-18_20X_Hypoxia_Lung2.6_SOX9_HOPX_SFTPC_003-MaxIP	471	99.11	10.47
IH2	2019-12-18_20X_Hypoxia_Lung2.6_SOX9_HOPX_SFTPC_003-MaxIP	103	101.05	11.74
[truncated: 181 more rows]
