# Supplementary material for: Short-term exposure to intermittent hypoxia leads to changes in gene expression seen in chronic pulmonary disease
Source: eLife journal article supplement (doi:10.7554/elife.63003), 2021-02-18
Supplement: supp [file Figure3-figureSupplement2C.xlsx]

## Sheet: Fig3S2C
MouseID	ImageID	Thickness	Unit
Control1	2019-12-16_Control_Lung1.6_SOX9_HOPX_SFTPC	5.54253	um
Control1	2019-12-16_Control_Lung1.6_SOX9_HOPX_SFTPC	6.17394	um
Control1	2019-12-16_Control_Lung1.6_SOX9_HOPX_SFTPC	5.86802	um
Control1	2019-12-16_Control_Lung1.6_SOX9_HOPX_SFTPC	2.90436	um
Control1	2019-12-16_Control_Lung1.6_SOX9_HOPX_SFTPC	3.72583	um
Control1	2019-12-16_Control_Lung1.6_SOX9_HOPX_SFTPC	6.36113	um
Control1	2019-12-16_Control_Lung1.6_SOX9_HOPX_SFTPC	4.76531	um
Control1	2019-12-16_Control_Lung1.6_SOX9_HOPX_SFTPC	6.23572	um
Control1	2019-12-16_Control_Lung1.6_SOX9_HOPX_SFTPC	3.02719	um
Control1	2019-12-16_Control_Lung1.6_SOX9_HOPX_SFTPC	5.27235	um
Control1	2019-12-16_Control_Lung1.6_SOX9_HOPX_SFTPC	6.08448	um
Control1	2019-12-16_Control_Lung1.6_SOX9_HOPX_SFTPC	4.89779	um
Control1	2019-12-16_Control_Lung1.6_SOX9_HOPX_SFTPC	5.52092	um
Control1	2019-12-16_Control_Lung1.6_SOX9_HOPX_SFTPC	6.36209	um
Control1	2019-12-16_Control_Lung1.6_SOX9_HOPX_SFTPC	5.23746	um
Control1	2019-12-16_Control_Lung1.6_SOX9_HOPX_SFTPC	6.2964	um
Control1	2019-12-16_Control_Lung1.6_SOX9_HOPX_SFTPC	4.03129	um
Control1	2019-12-16_Control_Lung1.6_SOX9_HOPX_SFTPC	4.16986	um
Control1	2019-12-16_Control_Lung1.6_SOX9_HOPX_SFTPC	2.70795	um
Control1	2019-12-16_Control_Lung1.6_SOX9_HOPX_SFTPC	6.74141	um
Control1	2019-12-16_Control_Lung1.6_SOX9_HOPX_SFTPC	8.54678	um
Control1	2019-12-16_Control_Lung1.6_SOX9_HOPX_SFTPC	4.94761	um
Control1	2019-12-16_Control_Lung1.6_SOX9_HOPX_SFTPC	5.49086	um
Control1	2019-12-16_Control_Lung1.6_SOX9_HOPX_SFTPC	3.0542	um
Control1	2019-12-16_Control_Lung1.6_SOX9_HOPX_SFTPC	4.677	um
Control1	2019-12-16_Control_Lung1.6_SOX9_HOPX_SFTPC	5.99152	um
Control1	2019-12-16_Control_Lung1.6_SOX9_HOPX_SFTPC	4.0978	um
Control1	2019-12-16_Control_Lung1.6_SOX9_HOPX_SFTPC	2.74356	um
Control1	2019-12-16_Control_Lung1.6_SOX9_HOPX_SFTPC	5.77635	um
Control1	2019-12-16_Control_Lung1.6_SOX9_HOPX_SFTPC	8.51246	um
Control1	2019-12-16_Control_Lung1.6_SOX9_HOPX_SFTPC	6.09759	um
Control1	2019-12-16_Control_Lung1.6_SOX9_HOPX_SFTPC	7.5083	um
Control1	2019-12-16_Control_Lung1.6_SOX9_HOPX_SFTPC	5.99861	um
Control1	2019-12-16_Control_Lung1.6_SOX9_HOPX_SFTPC	2.52654	um
Control1	2019-12-16_Control_Lung1.6_SOX9_HOPX_SFTPC	5.08206	um
Control1	2019-12-16_Control_Lung1.6_SOX9_HOPX_SFTPC	3.64676	um
Control1	2019-12-16_Control_Lung1.6_SOX9_HOPX_SFTPC	6.54175	um
Control1	2019-12-16_Control_Lung1.6_SOX9_HOPX_SFTPC	3.57363	um
Control1	2019-12-16_Control_Lung1.6_SOX9_HOPX_SFTPC	7.34855	um
Control1	2019-12-16_Control_Lung1.6_SOX9_HOPX_SFTPC	7.64627	um
Control1	2019-12-16_Control_Lung1.6_SOX9_HOPX_SFTPC	4.68362	um
Control1	2019-12-16_Control_Lung1.6_SOX9_HOPX_SFTPC	4.73186	um
Control1	2019-12-16_Control_Lung1.6_SOX9_HOPX_SFTPC	6.52982	um
Control1	2019-12-16_Control_Lung1.6_SOX9_HOPX_SFTPC	5.47953	um
Control1	2019-12-16_Control_Lung1.6_SOX9_HOPX_SFTPC	3.31693	um
Control1	2019-12-16_Control_Lung1.6_SOX9_HOPX_SFTPC	4.6893	um
Control1	2019-12-16_Control_Lung1.6_SOX9_HOPX_SFTPC	2.51953	um
Control1	2019-12-16_Control_Lung1.6_SOX9_HOPX_SFTPC	5.22516	um
Control1	2019-12-16_Control_Lung1.6_SOX9_HOPX_SFTPC	3.51732	um
Control1	2019-12-16_Control_Lung1.6_SOX9_HOPX_SFTPC	3.52558	um
Control1	2019-12-16_Control_Lung1.6_SOX9_HOPX_SFTPC	6.53949	um
Control1	2019-12-16_Control_Lung1.6_SOX9_HOPX_SFTPC	5.20458	um
Control1	2019-12-16_Control_Lung1.6_SOX9_HOPX_SFTPC	3.56246	um
Control1	2019-12-16_Control_Lung1.6_SOX9_HOPX_SFTPC	4.41145	um
Control1	2019-12-16_Control_Lung1.6_SOX9_HOPX_SFTPC	4.02486	um
Control1	2019-12-16_Control_Lung1.6_SOX9_HOPX_SFTPC	4.74044	um
Control1	2019-12-16_Control_Lung1.6_SOX9_HOPX_SFTPC	4.7533	um
Control1	2019-12-16_Control_Lung1.6_SOX9_HOPX_SFTPC	3.78007	um
Control1	2019-12-16_Control_Lung1.6_SOX9_HOPX_SFTPC	4.44283	um
Control1	2019-12-16_Control_Lung1.6_SOX9_HOPX_SFTPC	4.5768	um
Control1	2019-12-16_Control_Lung1.6_SOX9_HOPX_SFTPC	3.96323	um
Control1	2019-12-16_Control_Lung1.6_SOX9_HOPX_SFTPC	4.07026	um
Control1	2019-12-16_Control_Lung1.6_SOX9_HOPX_SFTPC	3.96223	um
Control1	2019-12-16_Control_Lung1.6_SOX9_HOPX_SFTPC	7.44216	um
Control1	2019-12-16_Control_Lung1.6_SOX9_HOPX_SFTPC	4.64012	um
Control1	2019-12-16_Control_Lung1.6_SOX9_HOPX_SFTPC	5.25642	um
Control1	2019-12-16_Control_Lung1.6_SOX9_HOPX_SFTPC	4.32108	um
Control1	2019-12-16_Control_Lung1.6_SOX9_HOPX_SFTPC	6.23256	um
Control1	2019-12-16_Control_Lung1.6_SOX9_HOPX_SFTPC	5.32609	um
Control1	2019-12-16_Control_Lung1.6_SOX9_HOPX_SFTPC	4.5488	um
Control1	2019-12-16_Control_Lung1.6_SOX9_HOPX_SFTPC	4.68855	um
Control1	2019-12-16_Control_Lung1.6_SOX9_HOPX_SFTPC	3.77917	um
Control1	2019-12-16_Control_Lung1.6_SOX9_HOPX_SFTPC	4.36879	um
Control1	2019-12-16_Control_Lung1.6_SOX9_HOPX_SFTPC	5.56507	um
Control1	2019-12-16_Control_Lung1.6_SOX9_HOPX_SFTPC	5.42852	um
Control1	2019-12-16_Control_Lung1.6_SOX9_HOPX_SFTPC	4.18237	um
Control1	2019-12-16_Control_Lung1.6_SOX9_HOPX_SFTPC	6.33965	um
Control1	2019-12-16_Control_Lung1.6_SOX9_HOPX_SFTPC	6.65583	um
Control1	2019-12-16_Control_Lung1.6_SOX9_HOPX_SFTPC	3.98201	um
Control1	2019-12-16_Control_Lung1.6_SOX9_HOPX_SFTPC	5.03952	um
Control1	2019-12-16_Control_Lung1.6_SOX9_HOPX_SFTPC	5.38422	um
Control1	2019-12-16_Control_Lung1.6_SOX9_HOPX_SFTPC	4.98384	um
Control1	2019-12-16_Control_Lung1.6_SOX9_HOPX_SFTPC	5.44819	um
Control1	2019-12-16_Control_Lung1.6_SOX9_HOPX_SFTPC	5.99307	um
Control1	2019-12-16_Control_Lung1.6_SOX9_HOPX_SFTPC	5.41568	um
Control1	2019-12-16_Control_Lung1.6_SOX9_HOPX_SFTPC	4.281	um
Control1	2019-12-16_Control_Lung1.6_SOX9_HOPX_SFTPC	8.29555	um
Control1	2019-12-16_Control_Lung1.6_SOX9_HOPX_SFTPC	7.19128	um
Control1	2019-12-16_Control_Lung1.6_SOX9_HOPX_SFTPC	3.51875	um
Control1	2019-12-16_Control_Lung1.6_SOX9_HOPX_SFTPC	4.31534	um
Control1	2019-12-16_Control_Lung1.6_SOX9_HOPX_SFTPC	7.01005	um
Control1	2019-12-16_Control_Lung1.6_SOX9_HOPX_SFTPC	4.35721	um
Control1	2019-12-16_Control_Lung1.6_SOX9_HOPX_SFTPC	3.05057	um
Control1	2019-12-16_Control_Lung1.6_SOX9_HOPX_SFTPC	5.10652	um
Control1	2019-12-16_Control_Lung1.6_SOX9_HOPX_SFTPC	6.24039	um
Control1	2019-12-16_Control_Lung1.6_SOX9_HOPX_SFTPC	5.36846	um
Control1	2019-12-16_Control_Lung1.6_SOX9_HOPX_SFTPC	7.10414	um
Control1	2019-12-16_Control_Lung1.6_SOX9_HOPX_SFTPC	5.83377	um
Control1	2019-12-16_Control_Lung1.6_SOX9_HOPX_SFTPC	4.76503	um
Control1	2019-12-16_Control_Lung1.6_SOX9_HOPX_SFTPC	4.53129	um
Control1	2019-12-16_Control_Lung1.6_SOX9_HOPX_SFTPC	7.87906	um
Control1	2019-12-16_Control_Lung1.6_SOX9_HOPX_SFTPC	8.06728	um
Control1	2019-12-16_Control_Lung1.6_SOX9_HOPX_SFTPC	5.27102	um
Control1	2019-12-16_Control_Lung1.6_SOX9_HOPX_SFTPC	5.68732	um
Control1	2019-12-16_Control_Lung1.6_SOX9_HOPX_SFTPC	5.05788	um
Control1	2019-12-16_Control_Lung1.6_SOX9_HOPX_SFTPC	4.77983	um
Control1	2019-12-16_Control_Lung1.6_SOX9_HOPX_SFTPC	4.17352	um
Control1	2019-12-16_Control_Lung1.6_SOX9_HOPX_SFTPC	3.83027	um
Control1	2019-12-16_Control_Lung1.6_SOX9_HOPX_SFTPC	5.82589	um
Control1	2019-12-16_Control_Lung1.6_SOX9_HOPX_SFTPC	3.05433	um
Control1	2019-12-16_Control_Lung1.6_SOX9_HOPX_SFTPC	3.87135	um
Control1	2019-12-16_Control_Lung1.6_SOX9_HOPX_SFTPC	4.45247	um
Control1	2019-12-16_Control_Lung1.6_SOX9_HOPX_SFTPC	5.70703	um
Control1	2019-12-16_Control_Lung1.6_SOX9_HOPX_SFTPC	5.1778	um
Control1	2019-12-16_Control_Lung1.6_SOX9_HOPX_SFTPC	4.96282	um
Control1	2019-12-16_Control_Lung1.6_SOX9_HOPX_SFTPC	5.80595	um
Control1	2019-12-16_Control_Lung1.6_SOX9_HOPX_SFTPC	5.28686	um
Control1	2019-12-16_Control_Lung1.6_SOX9_HOPX_SFTPC	6.77351	um
Control1	2019-12-16_Control_Lung1.6_SOX9_HOPX_SFTPC	4.06566	um
Control2	2019-12-17_Control_Lung2.6_SOX9_HOPX_SFTPC	5.40675	um
Control2	2019-12-17_Control_Lung2.6_SOX9_HOPX_SFTPC	3.70976	µm
Control2	2019-12-17_Control_Lung2.6_SOX9_HOPX_SFTPC	3.50518	µm
Control2	2019-12-17_Control_Lung2.6_SOX9_HOPX_SFTPC	5.91463	µm
Control2	2019-12-17_Control_Lung2.6_SOX9_HOPX_SFTPC	4.63121	µm
Control2	2019-12-17_Control_Lung2.6_SOX9_HOPX_SFTPC	4.51702	µm
Control2	2019-12-17_Control_Lung2.6_SOX9_HOPX_SFTPC	4.13242	µm
Control2	2019-12-17_Control_Lung2.6_SOX9_HOPX_SFTPC	3.60956	µm
Control2	2019-12-17_Control_Lung2.6_SOX9_HOPX_SFTPC	3.90337	µm
Control2	2019-12-17_Control_Lung2.6_SOX9_HOPX_SFTPC	3.49495	µm
Control2	2019-12-17_Control_Lung2.6_SOX9_HOPX_SFTPC	6.1015	µm
Control2	2019-12-17_Control_Lung2.6_SOX9_HOPX_SFTPC	3.87038	µm
Control2	2019-12-17_Control_Lung2.6_SOX9_HOPX_SFTPC	3.16165	µm
Control2	2019-12-17_Control_Lung2.6_SOX9_HOPX_SFTPC	3.68429	µm
Control2	2019-12-17_Control_Lung2.6_SOX9_HOPX_SFTPC	5.45961	µm
Control2	2019-12-17_Control_Lung2.6_SOX9_HOPX_SFTPC	4.50217	µm
Control2	2019-12-17_Control_Lung2.6_SOX9_HOPX_SFTPC	5.31088	µm
Control2	2019-12-17_Control_Lung2.6_SOX9_HOPX_SFTPC	3.07966	µm
Control2	2019-12-17_Control_Lung2.6_SOX9_HOPX_SFTPC	5.63369	µm
Control2	2019-12-17_Control_Lung2.6_SOX9_HOPX_SFTPC	4.26564	µm
Control2	2019-12-17_Control_Lung2.6_SOX9_HOPX_SFTPC	4.50765	µm
Control2	2019-12-17_Control_Lung2.6_SOX9_HOPX_SFTPC	5.89316	µm
Control2	2019-12-17_Control_Lung2.6_SOX9_HOPX_SFTPC	3.56588	µm
Control2	2019-12-17_Control_Lung2.6_SOX9_HOPX_SFTPC	4.13753	µm
Control2	2019-12-17_Control_Lung2.6_SOX9_HOPX_SFTPC	5.04838	µm
Control2	2019-12-17_Control_Lung2.6_SOX9_HOPX_SFTPC	4.16045	µm
Control2	2019-12-17_Control_Lung2.6_SOX9_HOPX_SFTPC	6.4785	µm
Control2	2019-12-17_Control_Lung2.6_SOX9_HOPX_SFTPC	5.29843	µm
Control2	2019-12-17_Control_Lung2.6_SOX9_HOPX_SFTPC	3.79898	µm
Control2	2019-12-17_Control_Lung2.6_SOX9_HOPX_SFTPC	3.85412	µm
Control2	2019-12-17_Control_Lung2.6_SOX9_HOPX_SFTPC	4.6303	µm
Control2	2019-12-17_Control_Lung2.6_SOX9_HOPX_SFTPC	4.58657	µm
Control2	2019-12-17_Control_Lung2.6_SOX9_HOPX_SFTPC	5.03465	µm
Control2	2019-12-17_Control_Lung2.6_SOX9_HOPX_SFTPC	4.54905	µm
Control2	2019-12-17_Control_Lung2.6_SOX9_HOPX_SFTPC	4.94293	µm
Control2	2019-12-17_Control_Lung2.6_SOX9_HOPX_SFTPC	2.57994	µm
Control2	2019-12-17_Control_Lung2.6_SOX9_HOPX_SFTPC	7.5859	µm
Control2	2019-12-17_Control_Lung2.6_SOX9_HOPX_SFTPC	5.5868	µm
Control2	2019-12-17_Control_Lung2.6_SOX9_HOPX_SFTPC	6.44821	µm
Control2	2019-12-17_Control_Lung2.6_SOX9_HOPX_SFTPC	6.99837	µm
Control2	2019-12-17_Control_Lung2.6_SOX9_HOPX_SFTPC	3.89368	µm
Control2	2019-12-17_Control_Lung2.6_SOX9_HOPX_SFTPC	2.61207	µm
Control2	2019-12-17_Control_Lung2.6_SOX9_HOPX_SFTPC	4.67895	µm
Control2	2019-12-17_Control_Lung2.6_SOX9_HOPX_SFTPC	4.6804	µm
Control2	2019-12-17_Control_Lung2.6_SOX9_HOPX_SFTPC	6.18933	µm
Control2	2019-12-17_Control_Lung2.6_SOX9_HOPX_SFTPC	6.19326	µm
Control2	2019-12-17_Control_Lung2.6_SOX9_HOPX_SFTPC	5.77791	µm
Control2	2019-12-17_Control_Lung2.6_SOX9_HOPX_SFTPC	3.60605	µm
Control2	2019-12-17_Control_Lung2.6_SOX9_HOPX_SFTPC	4.31522	µm
Control2	2019-12-17_Control_Lung2.6_SOX9_HOPX_SFTPC	3.35836	µm
Control2	2019-12-17_Control_Lung2.6_SOX9_HOPX_SFTPC	2.97652	µm
Control2	2019-12-17_Control_Lung2.6_SOX9_HOPX_SFTPC	5.34031	µm
Control2	2019-12-17_Control_Lung2.6_SOX9_HOPX_SFTPC	4.20395	µm
Control2	2019-12-17_Control_Lung2.6_SOX9_HOPX_SFTPC	3.94225	µm
Control2	2019-12-17_Control_Lung2.6_SOX9_HOPX_SFTPC	7.27495	µm
Control2	2019-12-17_Control_Lung2.6_SOX9_HOPX_SFTPC	4.61232	µm
Control2	2019-12-17_Control_Lung2.6_SOX9_HOPX_SFTPC	6.78009	µm
Control2	2019-12-17_Control_Lung2.6_SOX9_HOPX_SFTPC	3.45573	µm
Control2	2019-12-17_Control_Lung2.6_SOX9_HOPX_SFTPC	3.80804	µm
Control2	2019-12-17_Control_Lung2.6_SOX9_HOPX_SFTPC	4.52985	µm
Control2	2019-12-17_Control_Lung2.6_SOX9_HOPX_SFTPC	5.56676	µm
Control2	2019-12-17_Control_Lung2.6_SOX9_HOPX_SFTPC	2.59323	µm
Control2	2019-12-17_Control_Lung2.6_SOX9_HOPX_SFTPC	4.97409	µm
Control2	2019-12-17_Control_Lung2.6_SOX9_HOPX_SFTPC	3.91122	µm
Control2	2019-12-17_Control_Lung2.6_SOX9_HOPX_SFTPC	4.58947	µm
Control2	2019-12-17_Control_Lung2.6_SOX9_HOPX_SFTPC	3.53528	µm
Control2	2019-12-17_Control_Lung2.6_SOX9_HOPX_SFTPC	4.91715	µm
Control2	2019-12-17_Control_Lung2.6_SOX9_HOPX_SFTPC	3.23671	µm
Control2	2019-12-17_Control_Lung2.6_SOX9_HOPX_SFTPC	5.6913	µm
Control2	2019-12-17_Control_Lung2.6_SOX9_HOPX_SFTPC	4.40802	µm
Control2	2019-12-17_Control_Lung2.6_SOX9_HOPX_SFTPC	6.84604	µm
Control2	2019-12-17_Control_Lung2.6_SOX9_HOPX_SFTPC	5.51806	µm
Control2	2019-12-17_Control_Lung2.6_SOX9_HOPX_SFTPC	3.60355	µm
Control2	2019-12-17_Control_Lung2.6_SOX9_HOPX_SFTPC	4.51978	µm
Control2	2019-12-17_Control_Lung2.6_SOX9_HOPX_SFTPC	4.34341	µm
Control2	2019-12-17_Control_Lung2.6_SOX9_HOPX_SFTPC	3.75668	µm
Control2	2019-12-17_Control_Lung2.6_SOX9_HOPX_SFTPC	3.54721	µm
Control2	2019-12-17_Control_Lung2.6_SOX9_HOPX_SFTPC	5.68667	µm
Control2	2019-12-17_Control_Lung2.6_SOX9_HOPX_SFTPC	3.86177	µm
Control2	2019-12-17_Control_Lung2.6_SOX9_HOPX_SFTPC	4.69065	µm
Control2	2019-12-17_Control_Lung2.6_SOX9_HOPX_SFTPC	5.45681	µm
Control2	2019-12-17_Control_Lung2.6_SOX9_HOPX_SFTPC	3.47081	µm
Control2	2019-12-17_Control_Lung2.6_SOX9_HOPX_SFTPC	5.16666	µm
Control2	2019-12-17_Control_Lung2.6_SOX9_HOPX_SFTPC	3.82741	µm
Control2	2019-12-17_Control_Lung2.6_SOX9_HOPX_SFTPC	3.79252	µm
Control2	2019-12-17_Control_Lung2.6_SOX9_HOPX_SFTPC	4.55486	µm
Control2	2019-12-17_Control_Lung2.6_SOX9_HOPX_SFTPC	6.09109	µm
Control2	2019-12-17_Control_Lung2.6_SOX9_HOPX_SFTPC	4.22842	µm
Control2	2019-12-17_Control_Lung2.6_SOX9_HOPX_SFTPC	3.15334	µm
Control2	2019-12-17_Control_Lung2.6_SOX9_HOPX_SFTPC	2.81393	µm
Control2	2019-12-17_Control_Lung2.6_SOX9_HOPX_SFTPC	4.12458	µm
Control2	2019-12-17_Control_Lung2.6_SOX9_HOPX_SFTPC	4.62367	µm
Control2	2019-12-17_Control_Lung2.6_SOX9_HOPX_SFTPC	5.20434	µm
Control2	2019-12-17_Control_Lung2.6_SOX9_HOPX_SFTPC	5.74657	µm
Control2	2019-12-17_Control_Lung2.6_SOX9_HOPX_SFTPC	3.27947	µm
Control2	2019-12-17_Control_Lung2.6_SOX9_HOPX_SFTPC	2.6474	µm
Control2	2019-12-17_Control_Lung2.6_SOX9_HOPX_SFTPC	3.99541	µm
Control2	2019-12-17_Control_Lung2.6_SOX9_HOPX_SFTPC	4.67198	µm
Control2	2019-12-17_Control_Lung2.6_SOX9_HOPX_SFTPC	2.5789	µm
Control2	2019-12-17_Control_Lung2.6_SOX9_HOPX_SFTPC	2.55664	µm
Control2	2019-12-17_Control_Lung2.6_SOX9_HOPX_SFTPC	5.01454	µm
Control2	2019-12-17_Control_Lung2.6_SOX9_HOPX_SFTPC	3.94912	µm
Control2	2019-12-17_Control_Lung2.6_SOX9_HOPX_SFTPC	4.54174	µm
Control2	2019-12-17_Control_Lung2.6_SOX9_HOPX_SFTPC	2.60937	µm
Control2	2019-12-17_Control_Lung2.6_SOX9_HOPX_SFTPC	7.77737	µm
Control2	2019-12-17_Control_Lung2.6_SOX9_HOPX_SFTPC	4.83519	µm
Control2	2019-12-17_Control_Lung2.6_SOX9_HOPX_SFTPC	4.44328	µm
Control2	2019-12-17_Control_Lung2.6_SOX9_HOPX_SFTPC	5.7489	µm
Control2	2019-12-17_Control_Lung2.6_SOX9_HOPX_SFTPC	3.10189	µm
Control2	2019-12-17_Control_Lung2.6_SOX9_HOPX_SFTPC	5.84692	µm
Control2	2019-12-17_Control_Lung2.6_SOX9_HOPX_SFTPC	5.15163	µm
Control2	2019-12-17_Control_Lung2.6_SOX9_HOPX_SFTPC	3.36751	µm
Control2	2019-12-17_Control_Lung2.6_SOX9_HOPX_SFTPC	4.2367	µm
Control2	2019-12-17_Control_Lung2.6_SOX9_HOPX_SFTPC	4.71531	µm
Control2	2019-12-17_Control_Lung2.6_SOX9_HOPX_SFTPC	4.93889	µm
Control2	2019-12-17_Control_Lung2.6_SOX9_HOPX_SFTPC	3.28821	µm
Control2	2019-12-17_Control_Lung2.6_SOX9_HOPX_SFTPC	5.21408	µm
Control2	2019-12-17_Control_Lung2.6_SOX9_HOPX_SFTPC	3.99712	µm
Control2	2019-12-17_Control_Lung2.6_SOX9_HOPX_SFTPC	3.54837	µm
Control2	2019-12-17_Control_Lung2.6_SOX9_HOPX_SFTPC	2.73975	µm
Control2	2019-12-17_Control_Lung2.6_SOX9_HOPX_SFTPC	4.73724	µm
IH2	2019-12-18_Hypoxia_Lung2.6_SOX9_HOPX_SFTPC	5.28717	um
IH2	2019-12-18_Hypoxia_Lung2.6_SOX9_HOPX_SFTPC	5.79214	um
IH2	2019-12-18_Hypoxia_Lung2.6_SOX9_HOPX_SFTPC	4.46845	um
IH2	2019-12-18_Hypoxia_Lung2.6_SOX9_HOPX_SFTPC	5.85747	um
IH2	2019-12-18_Hypoxia_Lung2.6_SOX9_HOPX_SFTPC	4.53486	um
IH2	2019-12-18_Hypoxia_Lung2.6_SOX9_HOPX_SFTPC	3.71748	um
IH2	2019-12-18_Hypoxia_Lung2.6_SOX9_HOPX_SFTPC	3.32942	um
IH2	2019-12-18_Hypoxia_Lung2.6_SOX9_HOPX_SFTPC	4.03041	um
IH2	2019-12-18_Hypoxia_Lung2.6_SOX9_HOPX_SFTPC	3.65926	um
IH2	2019-12-18_Hypoxia_Lung2.6_SOX9_HOPX_SFTPC	3.84382	um
IH2	2019-12-18_Hypoxia_Lung2.6_SOX9_HOPX_SFTPC	3.11195	um
IH2	2019-12-18_Hypoxia_Lung2.6_SOX9_HOPX_SFTPC	5.23245	um
IH2	2019-12-18_Hypoxia_Lung2.6_SOX9_HOPX_SFTPC	5.85971	um
IH2	2019-12-18_Hypoxia_Lung2.6_SOX9_HOPX_SFTPC	3.83895	um
IH2	2019-12-18_Hypoxia_Lung2.6_SOX9_HOPX_SFTPC	4.1907	um
IH2	2019-12-18_Hypoxia_Lung2.6_SOX9_HOPX_SFTPC	3.91427	um
IH2	2019-12-18_Hypoxia_Lung2.6_SOX9_HOPX_SFTPC	5.6198	um
IH2	2019-12-18_Hypoxia_Lung2.6_SOX9_HOPX_SFTPC	4.25476	um
IH2	2019-12-18_Hypoxia_Lung2.6_SOX9_HOPX_SFTPC	2.845	um
IH2	2019-12-18_Hypoxia_Lung2.6_SOX9_HOPX_SFTPC	3.87919	um
IH2	2019-12-18_Hypoxia_Lung2.6_SOX9_HOPX_SFTPC	5.29	um
IH2	2019-12-18_Hypoxia_Lung2.6_SOX9_HOPX_SFTPC	5.79	um
IH2	2019-12-18_Hypoxia_Lung2.6_SOX9_HOPX_SFTPC	4.47	um
IH2	2019-12-18_Hypoxia_Lung2.6_SOX9_HOPX_SFTPC	5.86	um
IH2	2019-12-18_Hypoxia_Lung2.6_SOX9_HOPX_SFTPC	4.53	um
IH2	2019-12-18_Hypoxia_Lung2.6_SOX9_HOPX_SFTPC	3.72	um
IH2	2019-12-18_Hypoxia_Lung2.6_SOX9_HOPX_SFTPC	3.33	um
IH2	2019-12-18_Hypoxia_Lung2.6_SOX9_HOPX_SFTPC	4.03	um
IH2	2019-12-18_Hypoxia_Lung2.6_SOX9_HOPX_SFTPC	3.66	um
IH2	2019-12-18_Hypoxia_Lung2.6_SOX9_HOPX_SFTPC	3.84	um
IH2	2019-12-18_Hypoxia_Lung2.6_SOX9_HOPX_SFTPC	3.11	um
IH2	2019-12-18_Hypoxia_Lung2.6_SOX9_HOPX_SFTPC	5.23	um
IH2	2019-12-18_Hypoxia_Lung2.6_SOX9_HOPX_SFTPC	5.86	um
IH2	2019-12-18_Hypoxia_Lung2.6_SOX9_HOPX_SFTPC	3.84	um
IH2	2019-12-18_Hypoxia_Lung2.6_SOX9_HOPX_SFTPC	4.19	um
IH2	2019-12-18_Hypoxia_Lung2.6_SOX9_HOPX_SFTPC	3.91	um
IH2	2019-12-18_Hypoxia_Lung2.6_SOX9_HOPX_SFTPC	5.62	um
IH2	2019-12-18_Hypoxia_Lung2.6_SOX9_HOPX_SFTPC	4.25	um
IH2	2019-12-18_Hypoxia_Lung2.6_SOX9_HOPX_SFTPC	2.85	um
IH2	2019-12-18_Hypoxia_Lung2.6_SOX9_HOPX_SFTPC	3.88	um
IH2	2019-12-18_Hypoxia_Lung2.6_SOX9_HOPX_SFTPC	5.09715	um
IH2	2019-12-18_Hypoxia_Lung2.6_SOX9_HOPX_SFTPC	5.44107	um
IH2	2019-12-18_Hypoxia_Lung2.6_SOX9_HOPX_SFTPC	5.91712	um
IH2	2019-12-18_Hypoxia_Lung2.6_SOX9_HOPX_SFTPC	4.30035	um
IH2	2019-12-18_Hypoxia_Lung2.6_SOX9_HOPX_SFTPC	5.30157	um
IH2	2019-12-18_Hypoxia_Lung2.6_SOX9_HOPX_SFTPC	5.20736	um
IH2	2019-12-18_Hypoxia_Lung2.6_SOX9_HOPX_SFTPC	5.49087	um
IH2	2019-12-18_Hypoxia_Lung2.6_SOX9_HOPX_SFTPC	4.82916	um
IH2	2019-12-18_Hypoxia_Lung2.6_SOX9_HOPX_SFTPC	4.61299	um
IH2	2019-12-18_Hypoxia_Lung2.6_SOX9_HOPX_SFTPC	6.59647	um
IH2	2019-12-18_Hypoxia_Lung2.6_SOX9_HOPX_SFTPC	4.20665	um
IH2	2019-12-18_Hypoxia_Lung2.6_SOX9_HOPX_SFTPC	2.08844	um
IH2	2019-12-18_Hypoxia_Lung2.6_SOX9_HOPX_SFTPC	6.64419	um
IH2	2019-12-18_Hypoxia_Lung2.6_SOX9_HOPX_SFTPC	5.592	um
IH2	2019-12-18_Hypoxia_Lung2.6_SOX9_HOPX_SFTPC	4.40988	um
IH2	2019-12-18_Hypoxia_Lung2.6_SOX9_HOPX_SFTPC	5.30747	um
IH2	2019-12-18_Hypoxia_Lung2.6_SOX9_HOPX_SFTPC	3.9852	um
IH2	2019-12-18_Hypoxia_Lung2.6_SOX9_HOPX_SFTPC	4.35949	um
IH2	2019-12-18_Hypoxia_Lung2.6_SOX9_HOPX_SFTPC	3.90907	um
IH2	2019-12-18_Hypoxia_Lung2.6_SOX9_HOPX_SFTPC	4.44531	um
IH2	2019-12-18_Hypoxia_Lung2.6_SOX9_HOPX_SFTPC	5.98882	um
IH2	2019-12-18_Hypoxia_Lung2.6_SOX9_HOPX_SFTPC	4.48189	um
IH2	2019-12-18_Hypoxia_Lung2.6_SOX9_HOPX_SFTPC	4.57239	um
IH2	2019-12-18_Hypoxia_Lung2.6_SOX9_HOPX_SFTPC	5.73653	um
IH2	2019-12-18_Hypoxia_Lung2.6_SOX9_HOPX_SFTPC	4.128	um
IH2	2019-12-18_Hypoxia_Lung2.6_SOX9_HOPX_SFTPC	4.08188	um
IH2	2019-12-18_Hypoxia_Lung2.6_SOX9_HOPX_SFTPC	7.3374	um
IH2	2019-12-18_Hypoxia_Lung2.6_SOX9_HOPX_SFTPC	5.67524	um
IH2	2019-12-18_Hypoxia_Lung2.6_SOX9_HOPX_SFTPC	6.33055	um
IH2	2019-12-18_Hypoxia_Lung2.6_SOX9_HOPX_SFTPC	5.05403	um
IH2	2019-12-18_Hypoxia_Lung2.6_SOX9_HOPX_SFTPC	5.26934	um
IH2	2019-12-18_Hypoxia_Lung2.6_SOX9_HOPX_SFTPC	9.69976	um
IH2	2019-12-18_Hypoxia_Lung2.6_SOX9_HOPX_SFTPC	4.63346	um
IH2	2019-12-18_Hypoxia_Lung2.6_SOX9_HOPX_SFTPC	5.09039	um
IH2	2019-12-18_Hypoxia_Lung2.6_SOX9_HOPX_SFTPC	4.53932	um
IH2	2019-12-18_Hypoxia_Lung2.6_SOX9_HOPX_SFTPC	5.48095	um
IH2	2019-12-18_Hypoxia_Lung2.6_SOX9_HOPX_SFTPC	5.23381	um
IH2	2019-12-18_Hypoxia_Lung2.6_SOX9_HOPX_SFTPC	5.3358	um
IH2	2019-12-18_Hypoxia_Lung2.6_SOX9_HOPX_SFTPC	4.45164	um
IH2	2019-12-18_Hypoxia_Lung2.6_SOX9_HOPX_SFTPC	4.83497	um
IH2	2019-12-18_Hypoxia_Lung2.6_SOX9_HOPX_SFTPC	6.38959	um
IH2	2019-12-18_Hypoxia_Lung2.6_SOX9_HOPX_SFTPC	5.11571	um
IH2	2019-12-18_Hypoxia_Lung2.6_SOX9_HOPX_SFTPC	4.90081	um
IH2	2019-12-18_Hypoxia_Lung2.6_SOX9_HOPX_SFTPC	5.01189	um
IH2	2019-12-18_Hypoxia_Lung2.6_SOX9_HOPX_SFTPC	4.70407	um
IH2	2019-12-18_Hypoxia_Lung2.6_SOX9_HOPX_SFTPC	3.87408	um
IH2	2019-12-18_Hypoxia_Lung2.6_SOX9_HOPX_SFTPC	4.70355	um
IH2	2019-12-18_Hypoxia_Lung2.6_SOX9_HOPX_SFTPC	3.83675	um
IH2	2019-12-18_Hypoxia_Lung2.6_SOX9_HOPX_SFTPC	5.87771	um
IH2	2019-12-18_Hypoxia_Lung2.6_SOX9_HOPX_SFTPC	4.31338	um
IH2	2019-12-18_Hypoxia_Lung2.6_SOX9_HOPX_SFTPC	4.69917	um
IH2	2019-12-18_Hypoxia_Lung2.6_SOX9_HOPX_SFTPC	3.69894	um
IH2	2019-12-18_Hypoxia_Lung2.6_SOX9_HOPX_SFTPC	4.45174	um
IH2	2019-12-18_Hypoxia_Lung2.6_SOX9_HOPX_SFTPC	4.74232	um
IH2	2019-12-18_Hypoxia_Lung2.6_SOX9_HOPX_SFTPC	4.93147	um
IH2	2019-12-18_Hypoxia_Lung2.6_SOX9_HOPX_SFTPC	5.84168	um
IH2	2019-12-18_Hypoxia_Lung2.6_SOX9_HOPX_SFTPC	4.04843	um
IH2	2019-12-18_Hypoxia_Lung2.6_SOX9_HOPX_SFTPC	4.33395	um
IH2	2019-12-18_Hypoxia_Lung2.6_SOX9_HOPX_SFTPC	6.0385	um
IH2	2019-12-18_Hypoxia_Lung2.6_SOX9_HOPX_SFTPC	5.32051	um
IH2	2019-12-18_Hypoxia_Lung2.6_SOX9_HOPX_SFTPC	4.4301	um
IH2	2019-12-18_Hypoxia_Lung2.6_SOX9_HOPX_SFTPC	2.35468	um
IH2	2019-12-18_Hypoxia_Lung2.6_SOX9_HOPX_SFTPC	2.62463	um
IH2	2019-12-18_Hypoxia_Lung2.6_SOX9_HOPX_SFTPC	3.79841	um
IH2	2019-12-18_Hypoxia_Lung2.6_SOX9_HOPX_SFTPC	5.3847	um
IH2	2019-12-18_Hypoxia_Lung2.6_SOX9_HOPX_SFTPC	5.43671	um
IH2	2019-12-18_Hypoxia_Lung2.6_SOX9_HOPX_SFTPC	7.99852	um
IH2	2019-12-18_Hypoxia_Lung2.6_SOX9_HOPX_SFTPC	6.09922	um
IH2	2019-12-18_Hypoxia_Lung2.6_SOX9_HOPX_SFTPC	4.00299	um
IH2	2019-12-18_Hypoxia_Lung2.6_SOX9_HOPX_SFTPC	3.4936	um
IH2	2019-12-18_Hypoxia_Lung2.6_SOX9_HOPX_SFTPC	5.2266	um
IH2	2019-12-18_Hypoxia_Lung2.6_SOX9_HOPX_SFTPC	5.31232	um
IH2	2019-12-18_Hypoxia_Lung2.6_SOX9_HOPX_SFTPC	8.27864	um
IH2	2019-12-18_Hypoxia_Lung2.6_SOX9_HOPX_SFTPC	6.59226	um
IH2	2019-12-18_Hypoxia_Lung2.6_SOX9_HOPX_SFTPC	5.02265	um
IH2	2019-12-18_Hypoxia_Lung2.6_SOX9_HOPX_SFTPC	4.28834	um
IH2	2019-12-18_Hypoxia_Lung2.6_SOX9_HOPX_SFTPC	3.33281	um
IH2	2019-12-18_Hypoxia_Lung2.6_SOX9_HOPX_SFTPC	4.94395	um
IH2	2019-12-18_Hypoxia_Lung2.6_SOX9_HOPX_SFTPC	6.00674	um
IH4	2019-12-18_Hypoxia_Lung4.6_SOX9_HOPX_SFTPC	4.83615	um
IH4	2019-12-18_Hypoxia_Lung4.6_SOX9_HOPX_SFTPC	5.10806	um
IH4	2019-12-18_Hypoxia_Lung4.6_SOX9_HOPX_SFTPC	5.74783	um
IH4	2019-12-18_Hypoxia_Lung4.6_SOX9_HOPX_SFTPC	4.5799	um
IH4	2019-12-18_Hypoxia_Lung4.6_SOX9_HOPX_SFTPC	6.15328	um
IH4	2019-12-18_Hypoxia_Lung4.6_SOX9_HOPX_SFTPC	4.43583	um
IH4	2019-12-18_Hypoxia_Lung4.6_SOX9_HOPX_SFTPC	7.17235	um
IH4	2019-12-18_Hypoxia_Lung4.6_SOX9_HOPX_SFTPC	3.65926	um
IH4	2019-12-18_Hypoxia_Lung4.6_SOX9_HOPX_SFTPC	5.98944	um
IH4	2019-12-18_Hypoxia_Lung4.6_SOX9_HOPX_SFTPC	5.0199	um
IH4	2019-12-18_Hypoxia_Lung4.6_SOX9_HOPX_SFTPC	4.50328	um
IH4	2019-12-18_Hypoxia_Lung4.6_SOX9_HOPX_SFTPC	7.38404	um
IH4	2019-12-18_Hypoxia_Lung4.6_SOX9_HOPX_SFTPC	3.08499	um
IH4	2019-12-18_Hypoxia_Lung4.6_SOX9_HOPX_SFTPC	5.30003	um
IH4	2019-12-18_Hypoxia_Lung4.6_SOX9_HOPX_SFTPC	5.10334	um
IH4	2019-12-18_Hypoxia_Lung4.6_SOX9_HOPX_SFTPC	4.60943	um
IH4	2019-12-18_Hypoxia_Lung4.6_SOX9_HOPX_SFTPC	5.41453	um
IH4	2019-12-18_Hypoxia_Lung4.6_SOX9_HOPX_SFTPC	5.68589	um
IH4	2019-12-18_Hypoxia_Lung4.6_SOX9_HOPX_SFTPC	6.90055	um
IH4	2019-12-18_Hypoxia_Lung4.6_SOX9_HOPX_SFTPC	5.39409	um
IH4	2019-12-18_Hypoxia_Lung4.6_SOX9_HOPX_SFTPC	4.84367	um
IH4	2019-12-18_Hypoxia_Lung4.6_SOX9_HOPX_SFTPC	6.13703	um
IH4	2019-12-18_Hypoxia_Lung4.6_SOX9_HOPX_SFTPC	6.47833	um
IH4	2019-12-18_Hypoxia_Lung4.6_SOX9_HOPX_SFTPC	4.06511	um
IH4	2019-12-18_Hypoxia_Lung4.6_SOX9_HOPX_SFTPC	6.58251	um
IH4	2019-12-18_Hypoxia_Lung4.6_SOX9_HOPX_SFTPC	2.62924	um
IH4	2019-12-18_Hypoxia_Lung4.6_SOX9_HOPX_SFTPC	2.78156	um
IH4	2019-12-18_Hypoxia_Lung4.6_SOX9_HOPX_SFTPC	4.61488	um
IH4	2019-12-18_Hypoxia_Lung4.6_SOX9_HOPX_SFTPC	3.20888	um
IH4	2019-12-18_Hypoxia_Lung4.6_SOX9_HOPX_SFTPC	6.07355	um
IH4	2019-12-18_Hypoxia_Lung4.6_SOX9_HOPX_SFTPC	5.36211	um
IH4	2019-12-18_Hypoxia_Lung4.6_SOX9_HOPX_SFTPC	2.83223	um
IH4	2019-12-18_Hypoxia_Lung4.6_SOX9_HOPX_SFTPC	3.70329	um
IH4	2019-12-18_Hypoxia_Lung4.6_SOX9_HOPX_SFTPC	6.46401	um
IH4	2019-12-18_Hypoxia_Lung4.6_SOX9_HOPX_SFTPC	3.78747	um
IH4	2019-12-18_Hypoxia_Lung4.6_SOX9_HOPX_SFTPC	3.75442	um
IH4	2019-12-18_Hypoxia_Lung4.6_SOX9_HOPX_SFTPC	3.8185	um
IH4	2019-12-18_Hypoxia_Lung4.6_SOX9_HOPX_SFTPC	5.45078	um
IH4	2019-12-18_Hypoxia_Lung4.6_SOX9_HOPX_SFTPC	5.54768	um
IH4	2019-12-18_Hypoxia_Lung4.6_SOX9_HOPX_SFTPC	6.24482	um
IH4	2019-12-18_Hypoxia_Lung4.6_SOX9_HOPX_SFTPC	4.38148	um
IH4	2019-12-18_Hypoxia_Lung4.6_SOX9_HOPX_SFTPC	4.92104	um
IH4	2019-12-18_Hypoxia_Lung4.6_SOX9_HOPX_SFTPC	3.80121	um
IH4	2019-12-18_Hypoxia_Lung4.6_SOX9_HOPX_SFTPC	4.58872	um
IH4	2019-12-18_Hypoxia_Lung4.6_SOX9_HOPX_SFTPC	3.27288	um
IH4	2019-12-18_Hypoxia_Lung4.6_SOX9_HOPX_SFTPC	4.47823	um
IH4	2019-12-18_Hypoxia_Lung4.6_SOX9_HOPX_SFTPC	2.72593	um
IH4	2019-12-18_Hypoxia_Lung4.6_SOX9_HOPX_SFTPC	5.38284	um
IH4	2019-12-18_Hypoxia_Lung4.6_SOX9_HOPX_SFTPC	4.34225	um
IH4	2019-12-18_Hypoxia_Lung4.6_SOX9_HOPX_SFTPC	6.37626	um
IH4	2019-12-18_Hypoxia_Lung4.6_SOX9_HOPX_SFTPC	4.98971	um
IH4	2019-12-18_Hypoxia_Lung4.6_SOX9_HOPX_SFTPC	6.80974	um
IH4	2019-12-18_Hypoxia_Lung4.6_SOX9_HOPX_SFTPC	3.60235	um
IH4	2019-12-18_Hypoxia_Lung4.6_SOX9_HOPX_SFTPC	3.13456	um
IH4	2019-12-18_Hypoxia_Lung4.6_SOX9_HOPX_SFTPC	5.19545	um
IH4	2019-12-18_Hypoxia_Lung4.6_SOX9_HOPX_SFTPC	4.60044	um
IH4	2019-12-18_Hypoxia_Lung4.6_SOX9_HOPX_SFTPC	5.99317	um
IH4	2019-12-18_Hypoxia_Lung4.6_SOX9_HOPX_SFTPC	4.20437	um
IH4	2019-12-18_Hypoxia_Lung4.6_SOX9_HOPX_SFTPC	4.28875	um
IH4	2019-12-18_Hypoxia_Lung4.6_SOX9_HOPX_SFTPC	2.34633	um
IH4	2019-12-18_Hypoxia_Lung4.6_SOX9_HOPX_SFTPC	4.68548	um
IH4	2019-12-18_Hypoxia_Lung4.6_SOX9_HOPX_SFTPC	3.29244	um
IH4	2019-12-18_Hypoxia_Lung4.6_SOX9_HOPX_SFTPC	5.80905	um
IH4	2019-12-18_Hypoxia_Lung4.6_SOX9_HOPX_SFTPC	3.70198	um
IH4	2019-12-18_Hypoxia_Lung4.6_SOX9_HOPX_SFTPC	3.73406	um
IH4	2019-12-18_Hypoxia_Lung4.6_SOX9_HOPX_SFTPC	3.43629	um
IH4	2019-12-18_Hypoxia_Lung4.6_SOX9_HOPX_SFTPC	5.46204	um
IH4	2019-12-18_Hypoxia_Lung4.6_SOX9_HOPX_SFTPC	3.48588	um
IH4	2019-12-18_Hypoxia_Lung4.6_SOX9_HOPX_SFTPC	3.35229	um
IH4	2019-12-18_Hypoxia_Lung4.6_SOX9_HOPX_SFTPC	4.77528	um
IH4	2019-12-18_Hypoxia_Lung4.6_SOX9_HOPX_SFTPC	3.1924	um
IH4	2019-12-18_Hypoxia_Lung4.6_SOX9_HOPX_SFTPC	3.58797	um
IH4	2019-12-18_Hypoxia_Lung4.6_SOX9_HOPX_SFTPC	5.39461	um
IH4	2019-12-18_Hypoxia_Lung4.6_SOX9_HOPX_SFTPC	2.85342	um
IH4	2019-12-18_Hypoxia_Lung4.6_SOX9_HOPX_SFTPC	3.4526	um
IH4	2019-12-18_Hypoxia_Lung4.6_SOX9_HOPX_SFTPC	4.91183	um
IH4	2019-12-18_Hypoxia_Lung4.6_SOX9_HOPX_SFTPC	4.54651	um
IH4	2019-12-18_Hypoxia_Lung4.6_SOX9_HOPX_SFTPC	3.2823	um
IH4	2019-12-18_Hypoxia_Lung4.6_SOX9_HOPX_SFTPC	3.05018	um
IH4	2019-12-18_Hypoxia_Lung4.6_SOX9_HOPX_SFTPC	4.35662	um
IH4	2019-12-18_Hypoxia_Lung4.6_SOX9_HOPX_SFTPC	3.32784	um
IH4	2019-12-18_Hypoxia_Lung4.6_SOX9_HOPX_SFTPC	4.21089	um
IH4	2019-12-18_Hypoxia_Lung4.6_SOX9_HOPX_SFTPC	4.65779	um
IH4	2019-12-18_Hypoxia_Lung4.6_SOX9_HOPX_SFTPC	5.47424	um
IH4	2019-12-18_Hypoxia_Lung4.6_SOX9_HOPX_SFTPC	3.8431	um
IH4	2019-12-18_Hypoxia_Lung4.6_SOX9_HOPX_SFTPC	2.96833	um
IH4	2019-12-18_Hypoxia_Lung4.6_SOX9_HOPX_SFTPC	5.82427	um
IH4	2019-12-18_Hypoxia_Lung4.6_SOX9_HOPX_SFTPC	5.38962	um
IH4	2019-12-18_Hypoxia_Lung4.6_SOX9_HOPX_SFTPC	3.3815	um
IH4	2019-12-18_Hypoxia_Lung4.6_SOX9_HOPX_SFTPC	4.38846	um
IH4	2019-12-18_Hypoxia_Lung4.6_SOX9_HOPX_SFTPC	3.92872	um
IH4	2019-12-18_Hypoxia_Lung4.6_SOX9_HOPX_SFTPC	4.26563	um
IH4	2019-12-18_Hypoxia_Lung4.6_SOX9_HOPX_SFTPC	5.08816	um
IH4	2019-12-18_Hypoxia_Lung4.6_SOX9_HOPX_SFTPC	4.73059	um
IH4	2019-12-18_Hypoxia_Lung4.6_SOX9_HOPX_SFTPC	4.74529	um
IH4	2019-12-18_Hypoxia_Lung4.6_SOX9_HOPX_SFTPC	5.71153	um
IH4	2019-12-18_Hypoxia_Lung4.6_SOX9_HOPX_SFTPC	4.87082	um
IH4	2019-12-18_Hypoxia_Lung4.6_SOX9_HOPX_SFTPC	4.25924	um
IH4	2019-12-18_Hypoxia_Lung4.6_SOX9_HOPX_SFTPC	6.43005	um
IH4	2019-12-18_Hypoxia_Lung4.6_SOX9_HOPX_SFTPC	4.43474	um
IH4	2019-12-18_Hypoxia_Lung4.6_SOX9_HOPX_SFTPC	5.46388	um
IH4	2019-12-18_Hypoxia_Lung4.6_SOX9_HOPX_SFTPC	5.15264	um
IH4	2019-12-18_Hypoxia_Lung4.6_SOX9_HOPX_SFTPC	6.40548	um
IH4	2019-12-18_Hypoxia_Lung4.6_SOX9_HOPX_SFTPC	4.32732	um
IH4	2019-12-18_Hypoxia_Lung4.6_SOX9_HOPX_SFTPC	5.76607	um
IH4	2019-12-18_Hypoxia_Lung4.6_SOX9_HOPX_SFTPC	4.20375	um
IH4	2019-12-18_Hypoxia_Lung4.6_SOX9_HOPX_SFTPC	3.76805	um
IH4	2019-12-18_Hypoxia_Lung4.6_SOX9_HOPX_SFTPC	4.87342	um
IH4	2019-12-18_Hypoxia_Lung4.6_SOX9_HOPX_SFTPC	3.92979	um
IH4	2019-12-18_Hypoxia_Lung4.6_SOX9_HOPX_SFTPC	3.64278	um
IH4	2019-12-18_Hypoxia_Lung4.6_SOX9_HOPX_SFTPC	7.86878	um
IH4	2019-12-18_Hypoxia_Lung4.6_SOX9_HOPX_SFTPC	8.4877	um
IH4	2019-12-18_Hypoxia_Lung4.6_SOX9_HOPX_SFTPC	5.60745	um
IH4	2019-12-18_Hypoxia_Lung4.6_SOX9_HOPX_SFTPC	5.93314	um
IH4	2019-12-18_Hypoxia_Lung4.6_SOX9_HOPX_SFTPC	4.94698	um
IH4	2019-12-18_Hypoxia_Lung4.6_SOX9_HOPX_SFTPC	7.61639	um
IH4	2019-12-18_Hypoxia_Lung4.6_SOX9_HOPX_SFTPC	6.60633	um
IH4	2019-12-18_Hypoxia_Lung4.6_SOX9_HOPX_SFTPC	6.80629	um
IH4	2019-12-18_Hypoxia_Lung4.6_SOX9_HOPX_SFTPC	8.11842	um
IH4	2019-12-18_Hypoxia_Lung4.6_SOX9_HOPX_SFTPC	5.41352	um
IH4	2019-12-18_Hypoxia_Lung4.6_SOX9_HOPX_SFTPC	5.24639	um
