# Supplementary material for: Short-term exposure to intermittent hypoxia leads to changes in gene expression seen in chronic pulmonary disease
Source: eLife journal article supplement (doi:10.7554/elife.63003), 2021-02-18
Supplement: supp [file Figure5-figureSupplement3.xlsx]

## Sheet: A.TF_capillaryGeneral
TF	symbol	class	shape	AVG.rank
ENSMUSG00000024140	Epas1	shared	circle	1
ENSMUSG00000028639	Ybx1	shared	circle	2.5
ENSMUSG00000052684	Jun	shared	circle	2.5
ENSMUSG00000042812	Foxf1	shared	circle	4.5
ENSMUSG00000008575	Nfib	shared	circle	5.5
ENSMUSG00000007872	Id3	shared	circle	6.5
ENSMUSG00000003032	Klf4	shared	circle	9.5
ENSMUSG00000008398	Elk3	shared	square	10
ENSMUSG00000025959	Klf7	shared	circle	10
ENSMUSG00000053477	Tcf4	shared	square	10
ENSMUSG00000015053	Gata2	shared	circle	10.5
ENSMUSG00000042745	Id1	shared	circle	11
ENSMUSG00000019256	Ahr	shared	circle	14
ENSMUSG00000022708	Zbtb20	shared	square	14.5
ENSMUSG00000036867	Smad6	shared	circle	15
ENSMUSG00000025902	Sox17	shared	square	17
ENSMUSG00000033863	Klf9	shared	square	18
ENSMUSG00000022895	Ets2	shared	circle	22
ENSMUSG00000008393	Carhsp1	shared	square	22.5
ENSMUSG00000028977	Casz1	shared	square	23

## Sheet: B. TF_capillaryAerocyte
TF	symbol	class	shape	AVG.rank
ENSMUSG00000018604	Tbx3	shared	square	1
ENSMUSG00000028639	Ybx1	shared	circle	2
ENSMUSG00000042812	Foxf1	shared	circle	4
ENSMUSG00000000093	Tbx2	shared	square	5
ENSMUSG00000052684	Jun	shared	circle	5
ENSMUSG00000042745	Id1	shared	circle	5.5
ENSMUSG00000025959	Klf7	shared	circle	6
ENSMUSG00000003032	Klf4	shared	circle	7
ENSMUSG00000007872	Id3	shared	circle	10
ENSMUSG00000055053	Nfic	shared	square	10.5
ENSMUSG00000036867	Smad6	shared	circle	11
ENSMUSG00000039377	Hlx	shared	square	13
ENSMUSG00000037235	Mxd4	shared	square	14
ENSMUSG00000024140	Epas1	shared	circle	16.5
ENSMUSG00000001493	Meox1	shared	square	17
ENSMUSG00000015053	Gata2	shared	circle	17
ENSMUSG00000024921	Smarca2	shared	square	17
ENSMUSG00000022528	Hes1	shared	square	17.5
ENSMUSG00000008575	Nfib	shared	circle	18.5
ENSMUSG00000001288	Rarg	shared	square	19
ENSMUSG00000050064	Zfp697	shared	square	19.5
