# Supplementary material for: Short-term exposure to intermittent hypoxia leads to changes in gene expression seen in chronic pulmonary disease
Source: eLife journal article supplement (doi:10.7554/elife.63003), 2021-02-18
Supplement: supp [file Figure5A.xlsx]

## Sheet: Figure5A_umap
ID	UMAP1	UMAP2	group	ctype
GACTACATCAAGGTAA_10X_Hypoxia_20181212	-14.2269	-0.0910439	Hypoxia	EndoCap-a
TTGCGTCTCGTTACAG_10X_Hypoxia_20181212	-14.3573	0.399727	Hypoxia	EndoCap-a
CTTGGCTTCTGTCAAG_10X_Hypoxia_20181213	-13.8353	0.156824	Hypoxia	EndoCap-a
CAGCTGGTCTGTCTAT_10X_Hypoxia_20181213	-13.4775	-0.630172	Hypoxia	EndoCap-a
AGTCTTTTCTCCAACC_10X_Hypoxia_20181213	-13.7871	-0.567153	Hypoxia	EndoCap-a
TTTGCGCGTGTTTGTG_10X_Control_20180727	-15.9322	1.28448	Control	EndoCap-a
ATGCGATAGTCACGCC_10X_Hypoxia_20180727	-13.8514	-0.68325	Hypoxia	EndoCap-a
ATTGGTGTCTCGGACG_10X_Hypoxia_20181212	-15.0498	-0.519623	Hypoxia	EndoCap-a
AGAGCTTCAGGGAGAG_10X_Hypoxia_20180727	-14.5638	0.343387	Hypoxia	EndoCap-a
TGCTACCGTAGTGAAT_10X_Hypoxia_20181213	-16.0529	0.527523	Hypoxia	EndoCap-a
TCATTACGTCAGAATA_10X_Control_20181212	-15.6042	0.802495	Control	EndoCap-a
CACATAGGTTACAGAA_10X_Hypoxia_20181212	-15.0488	-0.71889	Hypoxia	EndoCap-a
AGGGAGTCACCGATAT_10X_Hypoxia_20180727	-14.6897	-0.266209	Hypoxia	EndoCap-a
CAAGTTGCAAACAACA_10X_Hypoxia_20181213	-13.7745	0.63649	Hypoxia	EndoCap-a
ATGCGATAGCCGATTT_10X_Hypoxia_20181212	-14.9668	-0.687932	Hypoxia	EndoCap-a
AGCTCCTCAAGCCATT_10X_Hypoxia_20181213	-15.9102	0.937325	Hypoxia	EndoCap-a
AGCGTCGTCCCTAATT_10X_Hypoxia_20181213	-15.2033	0.61802	Hypoxia	EndoCap-a
CACACAATCTTACCGC_10X_Hypoxia_20181212	-14.0352	0.674361	Hypoxia	EndoCap-a
GCATGATTCTGCTTGC_10X_Hypoxia_20181212	-16.2357	1.00162	Hypoxia	EndoCap-a
GCTGCAGTCCTAGGGC_10X_Hypoxia_20180727	-15.6434	-0.268786	Hypoxia	EndoCap-a
GGAGCAATCGTTGCCT_10X_Hypoxia_20181212	-14.8986	0.575174	Hypoxia	EndoCap-a
AACCATGAGTGCCAGA_10X_Control_20181212	-16.3764	0.449989	Control	EndoCap-a
ACGAGGATCGAACTGT_10X_Hypoxia_20180727	-14.1007	-0.854376	Hypoxia	EndoCap-a
TACACGAAGGCATGGT_10X_Control_20181212	-15.7437	1.1411	Control	EndoCap-a
TCGCGAGCATCATCCC_10X_Hypoxia_20181213	-13.6868	-1.21731	Hypoxia	EndoCap-a
GCTGCAGAGATTACCC_10X_Hypoxia_20181212	-14.3233	0.117336	Hypoxia	EndoCap-a
AGAGTGGCATACTACG_10X_Hypoxia_20181212	-15.5093	-0.694985	Hypoxia	EndoCap-a
TACCTTAGTGGGTCAA_10X_Hypoxia_20181212	-13.5713	-0.369598	Hypoxia	EndoCap-a
ACGTCAAAGGGCTCTC_10X_Hypoxia_20180727	-15.0508	1.72596	Hypoxia	EndoCap-a
AGCTCCTAGACATAAC_10X_Hypoxia_20180727	-13.6788	0.0248295	Hypoxia	EndoCap-a
ATCATGGGTGGTGTAG_10X_Hypoxia_20180727	-15.4624	-0.471207	Hypoxia	EndoCap-a
AGGCCGTCACGCCAGT_10X_Hypoxia_20181213	-13.8747	1.97731	Hypoxia	EndoCap-a
GCAGCCACATCGATGT_10X_Hypoxia_20180727	-13.6189	1.23146	Hypoxia	EndoCap-a
GTATTCTGTTGCCTCT_10X_Hypoxia_20181212	-15.9312	1.25535	Hypoxia	EndoCap-a
GAAATGAAGTCGATAA_10X_Hypoxia_20181212	-14.802	-0.956017	Hypoxia	EndoCap-a
CTTGGCTAGTGGGTTG_10X_Hypoxia_20181212	-15.896	-0.216216	Hypoxia	EndoCap-a
CGACTTCAGCCCAATT_10X_Hypoxia_20181212	-14.3831	-0.611265	Hypoxia	EndoCap-a
ACCCACTGTGTTTGTG_10X_Hypoxia_20181212	-13.3381	0.7009	Hypoxia	EndoCap-a
CTGTTTATCACGACTA_10X_Hypoxia_20181213	-14.6305	0.0573732	Hypoxia	EndoCap-a
TGGGAAGAGCACACAG_10X_Hypoxia_20181212	-15.5261	0.451156	Hypoxia	EndoCap-a
CCTCTGACAGTCGATT_10X_Hypoxia_20181212	-13.3111	-0.21328	Hypoxia	EndoCap-a
CTACACCGTCTCTTAT_10X_Hypoxia_20181213	-14.1446	-0.454015	Hypoxia	EndoCap-a
ATTCTACCAAGTAATG_10X_Hypoxia_20181212	-15.6734	0.836806	Hypoxia	EndoCap-a
AGTGGGATCCAGAGGA_10X_Control_20181212	-15.6828	1.32632	Control	EndoCap-a
AGAATAGAGATGTGGC_10X_Hypoxia_20181212	-15.388	-0.352194	Hypoxia	EndoCap-a
TCAGGATGTTCCACAA_10X_Control_20180727	-16.0397	0.416383	Control	EndoCap-a
AGCTCTCAGGACACCA_10X_Control_20180727	-15.3912	1.75662	Control	EndoCap-a
GCTGGGTCAGCCTTTC_10X_Hypoxia_20181212	-15.462	1.10388	Hypoxia	EndoCap-a
CGCGTTTTCATTGCGA_10X_Hypoxia_20181212	-15.9834	0.342597	Hypoxia	EndoCap-a
AAGGTTCCATACAGCT_10X_Hypoxia_20181213	-14.8949	-0.647642	Hypoxia	EndoCap-a
CAGCTAATCAGTTCGA_10X_Hypoxia_20181213	-13.3218	1.37265	Hypoxia	EndoCap-a
TTAGGACTCAAGATCC_10X_Hypoxia_20181212	-14.423	-0.695415	Hypoxia	EndoCap-a
CTGTTTAAGACCTTTG_10X_Control_20180727	-15.2454	-0.265281	Control	EndoCap-a
TCACGAACATAGTAAG_10X_Hypoxia_20181213	-15.8518	-0.381517	Hypoxia	EndoCap-a
GTAGTCACACGGCTAC_10X_Hypoxia_20181212	-15.7664	-0.0985046	Hypoxia	EndoCap-a
ACGATGTCATCCCACT_10X_Hypoxia_20181213	-14.7573	-1.10846	Hypoxia	EndoCap-a
TACTCATCAAGGTGTG_10X_Hypoxia_20181212	-13.6032	-0.2905	Hypoxia	EndoCap-a
GACGTGCGTTACGCGC_10X_Control_20181212	-16.0792	0.849548	Control	EndoCap-a
AAACCTGCACCAGGCT_10X_Hypoxia_20180727	-16.3031	-0.244017	Hypoxia	EndoCap-a
GCATACAAGCGAGAAA_10X_Control_20181212	-14.374	-0.516978	Control	EndoCap-a
TGGCTGGAGAAGGTTT_10X_Hypoxia_20180727	-13.5102	1.78477	Hypoxia	EndoCap-a
AAAGATGCAAACGCGA_10X_Hypoxia_20181212	-14.138	1.15433	Hypoxia	EndoCap-a
TCAGCAAAGCTAACAA_10X_Hypoxia_20180727	-13.178	1.41789	Hypoxia	EndoCap-a
AATCCAGAGAGTACAT_10X_Control_20181212	-15.3774	0.703187	Control	EndoCap-a
GAACCTATCCATGAAC_10X_Hypoxia_20181212	-13.971	-0.634621	Hypoxia	EndoCap-a
CCGGTAGCACAGCCCA_10X_Control_20181212	-15.1865	0.209762	Control	EndoCap-a
CTCGTCAGTGCAGACA_10X_Hypoxia_20181212	-15.9943	0.298913	Hypoxia	EndoCap-a
GTACGTACAATGCCAT_10X_Hypoxia_20181212	-16.0963	-0.189426	Hypoxia	EndoCap-a
GCTGCAGGTAGCCTAT_10X_Hypoxia_20181213	-15.8599	-0.706608	Hypoxia	EndoCap-a
GTCACGGGTAGCAAAT_10X_Control_20181212	-15.7402	0.0819158	Control	EndoCap-a
GACAGAGCACATCCAA_10X_Control_20181212	-14.3574	1.23155	Control	EndoCap-a
TCGGTAATCTTGTATC_10X_Hypoxia_20180727	-14.1057	0.482165	Hypoxia	EndoCap-a
CTTAACTGTCTTGCGG_10X_Hypoxia_20181212	-14.2677	0.314244	Hypoxia	EndoCap-a
CTACATTGTTATGCGT_10X_Hypoxia_20181213	-14.193	-0.0114574	Hypoxia	EndoCap-a
GCTGCGAAGATATGCA_10X_Hypoxia_20181213	-14.082	-0.518098	Hypoxia	EndoCap-a
GATGAAATCATCATTC_10X_Control_20181212	-14.6439	1.58918	Control	EndoCap-a
GTACTTTTCATACGGT_10X_Hypoxia_20181213	-13.5903	0.0210748	Hypoxia	EndoCap-a
ATTATCCGTCAGAGGT_10X_Hypoxia_20181212	-14.7867	-0.81482	Hypoxia	EndoCap-a
TTCGAAGAGTGAACGC_10X_Control_20181212	-16.2893	0.811559	Control	EndoCap-a
GAACGGAGTTGTACAC_10X_Hypoxia_20181213	-14.1328	1.47908	Hypoxia	EndoCap-a
ATGAGGGCATCGGAAG_10X_Hypoxia_20181212	-13.1487	0.085666	Hypoxia	EndoCap-a
ATCTGCCAGCCCAATT_10X_Control_20181212	-16.2581	0.51686	Control	EndoCap-a
ATTATCCTCGATCCCT_10X_Control_20181212	-16.2808	1.3305	Control	EndoCap-a
CTACACCTCGCGGATC_10X_Control_20181212	-14.4088	0.165459	Control	EndoCap-a
TCGCGTTAGCTAAACA_10X_Hypoxia_20181212	-14.2951	-1.03848	Hypoxia	EndoCap-a
TGCTGCTGTCAGATAA_10X_Hypoxia_20181212	-16.2414	-0.128707	Hypoxia	EndoCap-a
ACACTGACAAGTTGTC_10X_Hypoxia_20180727	-16.0322	1.09496	Hypoxia	EndoCap-a
CAGTCCTTCGAATGCT_10X_Hypoxia_20181213	-15.9308	-0.347919	Hypoxia	EndoCap-a
TTTGTCATCTTAGAGC_10X_Hypoxia_20181213	-15.2533	-0.711191	Hypoxia	EndoCap-a
GAACGGAGTCTTGTCC_10X_Hypoxia_20181213	-15.3977	0.0457465	Hypoxia	EndoCap-a
CTCATTAAGCTGAACG_10X_Hypoxia_20181212	-13.4962	0.932073	Hypoxia	EndoCap-a
TTATGCTGTTAAGAAC_10X_Hypoxia_20180727	-15.4699	-0.669026	Hypoxia	EndoCap-a
CGATCGGTCTGTCTAT_10X_Control_20181212	-14.2865	1.32639	Control	EndoCap-a
AACTTTCGTAAATGAC_10X_Hypoxia_20181213	-13.6273	1.81109	Hypoxia	EndoCap-a
CCACCTACAAGGACAC_10X_Control_20180727	-14.3377	1.42811	Control	EndoCap-a
GACGGCTTCATGCTCC_10X_Control_20181212	-15.9489	1.36216	Control	EndoCap-a
TTGGCAAGTAGCCTCG_10X_Hypoxia_20180727	-16.0723	0.856051	Hypoxia	EndoCap-a
TGACTTTTCACCCTCA_10X_Hypoxia_20180727	-13.911	0.853436	Hypoxia	EndoCap-a
AGATTGCGTAGCGATG_10X_Control_20181212	-14.4695	1.02927	Control	EndoCap-a
AGTGGGACAGGTGGAT_10X_Hypoxia_20181212	-15.7288	-0.156413	Hypoxia	EndoCap-a
GTGAAGGAGCATCATC_10X_Control_20180727	-16.4205	0.401804	Control	EndoCap-a
AGAGTGGTCTTCATGT_10X_Control_20180727	-15.8514	1.13586	Control	EndoCap-a
TACTTACGTTCCACAA_10X_Hypoxia_20180727	-15.0882	0.175259	Hypoxia	EndoCap-a
CCCATACTCAAGGCTT_10X_Hypoxia_20181213	-14.9866	-0.983372	Hypoxia	EndoCap-a
AACCATGGTTCGCTAA_10X_Hypoxia_20180727	-15.0438	0.586981	Hypoxia	EndoCap-a
CATCAAGAGCCACGTC_10X_Hypoxia_20181213	-13.3143	1.00285	Hypoxia	EndoCap-a
GCATGCGTCAGGATCT_10X_Hypoxia_20181212	-15.4066	0.346775	Hypoxia	EndoCap-a
CTGCGGAGTAGGGACT_10X_Hypoxia_20181213	-14.1774	0.0577657	Hypoxia	EndoCap-a
GACACGCGTCGACTAT_10X_Control_20181212	-15.3789	1.89396	Control	EndoCap-a
GCATACAAGTACGTTC_10X_Hypoxia_20181213	-14.8857	-0.279194	Hypoxia	EndoCap-a
CAAGTTGAGACAAAGG_10X_Hypoxia_20181212	-14.8584	0.833508	Hypoxia	EndoCap-a
CGAATGTAGTGGTCCC_10X_Hypoxia_20181213	-15.7622	-0.153209	Hypoxia	EndoCap-a
AGATTGCGTACGAAAT_10X_Hypoxia_20181212	-14.4484	1.61885	Hypoxia	EndoCap-a
GCATGCGAGTGTACGG_10X_Control_20180727	-15.6338	0.613386	Control	EndoCap-a
CCTAAAGAGAAGAAGC_10X_Hypoxia_20181212	-13.7273	-0.915729	Hypoxia	EndoCap-a
GTCGTAAGTCCAGTGC_10X_Hypoxia_20181213	-14.9781	-0.0254461	Hypoxia	EndoCap-a
TACTCGCAGTTCCACA_10X_Hypoxia_20181212	-15.7423	1.42346	Hypoxia	EndoCap-a
ACCCACTAGGTTCCTA_10X_Control_20181212	-14.5844	1.46993	Control	EndoCap-a
TCGTAGATCAACACGT_10X_Control_20181212	-14.3511	0.476043	Control	EndoCap-a
CGGACACAGTCCAGGA_10X_Hypoxia_20181212	-14.4063	-0.664766	Hypoxia	EndoCap-a
ACTTTCAAGTGTACTC_10X_Hypoxia_20181212	-13.4275	0.235043	Hypoxia	EndoCap-a
GCATACAGTGTGGCTC_10X_Hypoxia_20181213	-13.56	-0.152517	Hypoxia	EndoCap-a
GAATAAGAGGACTGGT_10X_Control_20181212	-14.8256	1.3732	Control	EndoCap-a
AACCGCGGTGTGGCTC_10X_Hypoxia_20181213	-14.977	-0.629536	Hypoxia	EndoCap-a
GTCGGGTTCACATACG_10X_Hypoxia_20180727	-13.7803	-0.344513	Hypoxia	EndoCap-a
TGAGCATAGAATTCCC_10X_Control_20181212	-16.2646	0.895836	Control	EndoCap-a
AGTCTTTCAGACTCGC_10X_Hypoxia_20180727	-15.6742	0.0203788	Hypoxia	EndoCap-a
CTACATTAGCTAAACA_10X_Control_20181212	-16.186	0.671369	Control	EndoCap-a
TCGGTAATCGTATCAG_10X_Hypoxia_20181212	-14.0384	0.0279209	Hypoxia	EndoCap-a
GACGGCTTCGTTTAGG_10X_Control_20181212	-14.8397	0.0799396	Control	EndoCap-a
GGCGTGTTCGACGGAA_10X_Hypoxia_20180727	-14.5647	-0.879537	Hypoxia	EndoCap-a
AGACGTTTCCAAACAC_10X_Hypoxia_20181212	-14.6432	-1.1967	Hypoxia	EndoCap-a
TACCTATGTAAGAGGA_10X_Hypoxia_20181213	-15.9906	1.26066	Hypoxia	EndoCap-a
AAGGAGCGTCCGACGT_10X_Hypoxia_20181212	-15.7185	-0.547259	Hypoxia	EndoCap-a
CGAGCACCATAGTAAG_10X_Hypoxia_20181213	-13.9235	0.113237	Hypoxia	EndoCap-a
CGATCGGTCCAGTATG_10X_Control_20181212	-14.2929	1.7917	Control	EndoCap-a
ACACCCTGTGGTCCGT_10X_Hypoxia_20181213	-13.807	-0.314785	Hypoxia	EndoCap-a
AGAATAGAGCACCGTC_10X_Hypoxia_20181212	-14.5616	-0.6599	Hypoxia	EndoCap-a
AGCATACCACCGAATT_10X_Hypoxia_20180727	-14.8846	0.20438	Hypoxia	EndoCap-a
GATCTAGTCTTTCCTC_10X_Hypoxia_20180727	-15.2316	0.298817	Hypoxia	EndoCap-a
GGACAGATCTGTCTCG_10X_Hypoxia_20181212	-14.0401	-1.03058	Hypoxia	EndoCap-a
GTGAAGGCACCATCCT_10X_Hypoxia_20180727	-15.432	-0.182868	Hypoxia	EndoCap-a
AGATCTGCAAGTCTGT_10X_Hypoxia_20181213	-14.7555	0.0843362	Hypoxia	EndoCap-a
CCACTACGTGTTTGGT_10X_Hypoxia_20181213	-15.4996	-0.526627	Hypoxia	EndoCap-a
CATGACAAGCGACGTA_10X_Hypoxia_20181213	-15.7408	0.012795	Hypoxia	EndoCap-a
AAATGCCAGGCTAGGT_10X_Hypoxia_20181213	-14.1558	0.459903	Hypoxia	EndoCap-a
ACGCAGCAGTAACCCT_10X_Control_20181212	-15.7897	1.02175	Control	EndoCap-a
AGTGTCATCACTATTC_10X_Hypoxia_20180727	-14.8665	-0.913708	Hypoxia	EndoCap-a
GTCATTTGTTTACTCT_10X_Control_20180727	-16.2263	1.55752	Control	EndoCap-a
GGCCGATAGGCCCGTT_10X_Hypoxia_20180727	-15.6675	-0.526011	Hypoxia	EndoCap-a
GTTCTCGTCAAACCGT_10X_Hypoxia_20181213	-14.8261	0.124288	Hypoxia	EndoCap-a
GATCGATCAAACCCAT_10X_Hypoxia_20180727	-15.5209	-0.299588	Hypoxia	EndoCap-a
CTCTAATTCACTGGGC_10X_Hypoxia_20181213	-14.6166	0.803366	Hypoxia	EndoCap-a
CGAGCACCACGTCTCT_10X_Control_20180727	-13.8869	0.735501	Control	EndoCap-a
CCTCTGAGTTCAACCA_10X_Control_20181212	-14.9498	0.936098	Control	EndoCap-a
CACATAGAGCTGGAAC_10X_Hypoxia_20181213	-14.0946	0.751243	Hypoxia	EndoCap-a
ATTTCTGGTGAAATCA_10X_Hypoxia_20180727	-14.429	0.239471	Hypoxia	EndoCap-a
CCACTACAGCACACAG_10X_Hypoxia_20181212	-14.7846	0.845192	Hypoxia	EndoCap-a
CGTTCTGGTGGTAACG_10X_Hypoxia_20181213	-15.3133	-0.905287	Hypoxia	EndoCap-a
CGAGAAGAGTGACTCT_10X_Hypoxia_20181212	-13.6296	-0.324101	Hypoxia	EndoCap-a
AAAGTAGCATTCGACA_10X_Control_20181212	-14.0299	0.884944	Control	EndoCap-a
GGGCACTTCAGTTGAC_10X_Hypoxia_20180727	-13.855	0.469141	Hypoxia	EndoCap-a
GGGAGATAGGTGCTTT_10X_Control_20181212	-14.0732	1.26742	Control	EndoCap-a
TTTGTCAAGAATGTGT_10X_Control_20180727	-15.2483	0.835244	Control	EndoCap-a
TCAGGTACAAGCTGAG_10X_Control_20181212	-14.4693	1.68103	Control	EndoCap-a
AGATCTGAGATGTGTA_10X_Control_20181212	-15.2006	0.939286	Control	EndoCap-a
TGGCGCACAAAGAATC_10X_Hypoxia_20181212	-15.0423	-0.686903	Hypoxia	EndoCap-a
TAAGCGTAGCGATAGC_10X_Hypoxia_20181213	-15.77	-0.587864	Hypoxia	EndoCap-a
CAGAATCCAAGGTTCT_10X_Hypoxia_20180727	-13.4388	-0.413621	Hypoxia	EndoCap-a
CACCACTAGTCTCGGC_10X_Hypoxia_20181213	-15.7505	0.879859	Hypoxia	EndoCap-a
TTTATGCAGGTGCTTT_10X_Hypoxia_20180727	-15.7052	0.34168	Hypoxia	EndoCap-a
ACTGAACAGCCGGTAA_10X_Control_20180727	-14.8375	1.17501	Control	EndoCap-a
GACGTGCGTTTGGCGC_10X_Hypoxia_20181213	-13.7258	-0.211823	Hypoxia	EndoCap-a
GATCGTATCGGAAACG_10X_Hypoxia_20181213	-14.9102	-0.775054	Hypoxia	EndoCap-a
ATTCTACTCATCGATG_10X_Hypoxia_20181212	-15.4942	-0.354269	Hypoxia	EndoCap-a
ATCACGAAGTAAGTAC_10X_Hypoxia_20181213	-13.0557	-1.39104	Hypoxia	EndoCap-a
GATCGATGTTCCGTCT_10X_Hypoxia_20181212	-15.196	0.361123	Hypoxia	EndoCap-a
GGCTCGAGTCGCATAT_10X_Hypoxia_20181213	-15.2232	0.318203	Hypoxia	EndoCap-a
TAGTTGGCACCAGTTA_10X_Hypoxia_20181213	-14.318	0.608949	Hypoxia	EndoCap-a
TGCGTGGCATGAGCGA_10X_Hypoxia_20181212	-16.0857	0.314534	Hypoxia	EndoCap-a
GGGTCTGGTTATCCGA_10X_Hypoxia_20181213	-14.6118	-0.252532	Hypoxia	EndoCap-a
CAGTCCTTCGGCTACG_10X_Hypoxia_20181212	-15.2164	-0.982364	Hypoxia	EndoCap-a
AGAGTGGCACGGTAGA_10X_Hypoxia_20180727	-14.542	1.31069	Hypoxia	EndoCap-a
TTAGTTCAGGCATGTG_10X_Hypoxia_20181213	-15.5506	0.407317	Hypoxia	EndoCap-a
TTCGGTCCAGCATGAG_10X_Hypoxia_20181213	-13.9658	0.163203	Hypoxia	EndoCap-a
ATCCGAACACATTTCT_10X_Hypoxia_20181213	-13.1937	0.839502	Hypoxia	EndoCap-a
GGGAGATTCACCATAG_10X_Hypoxia_20181213	-15.3838	-0.739158	Hypoxia	EndoCap-a
TCTTTCCAGAGAGCTC_10X_Hypoxia_20181212	-13.7756	-0.448231	Hypoxia	EndoCap-a
CAGATCAGTTCTGTTT_10X_Hypoxia_20181212	-16.2974	-0.381534	Hypoxia	EndoCap-a
GCAATCATCAGTTGAC_10X_Control_20181212	-15.7595	0.969256	Control	EndoCap-a
TGGACGCTCTTGTTTG_10X_Control_20181212	-16.3555	0.324547	Control	EndoCap-a
CAAGATCTCGGTTCGG_10X_Hypoxia_20180727	-13.6289	-0.108786	Hypoxia	EndoCap-a
GGTGTTAGTATGGTTC_10X_Control_20180727	-16.308	1.23652	Control	EndoCap-a
TGAGCATGTAAGTAGT_10X_Hypoxia_20180727	-14.5327	0.511282	Hypoxia	EndoCap-a
CCCAGTTCAATGGAGC_10X_Hypoxia_20181212	-14.9107	1.32064	Hypoxia	EndoCap-a
CACACTCCAATAGCAA_10X_Hypoxia_20181213	-15.4315	0.471357	Hypoxia	EndoCap-a
GTACTTTTCAACGAAA_10X_Hypoxia_20181213	-13.3622	-1.43518	Hypoxia	EndoCap-a
AGATTGCGTGCCTTGG_10X_Hypoxia_20181213	-15.309	-0.52355	Hypoxia	EndoCap-a
CCTCAGTTCATAGCAC_10X_Hypoxia_20180727	-16.1668	-0.0806673	Hypoxia	EndoCap-a
TATGCCCTCCGAGCCA_10X_Hypoxia_20180727	-16.3045	0.20424	Hypoxia	EndoCap-a
GATTCAGGTAGTAGTA_10X_Hypoxia_20181212	-15.817	-0.858104	Hypoxia	EndoCap-a
GCTTGAAAGTCATGCT_10X_Hypoxia_20181213	-15.3878	0.734113	Hypoxia	EndoCap-a
TGTATTCTCAAAGACA_10X_Hypoxia_20181213	-15.2841	-0.698981	Hypoxia	EndoCap-a
ACGGGCTCATAGGATA_10X_Hypoxia_20180727	-15.0516	-0.8051	Hypoxia	EndoCap-a
CGCGTTTGTGGAAAGA_10X_Hypoxia_20181212	-15.8005	1.88341	Hypoxia	EndoCap-a
GTCAAGTCATGTTCCC_10X_Hypoxia_20181212	-14.2652	-0.879845	Hypoxia	EndoCap-a
GATGAAATCGTGGGAA_10X_Hypoxia_20180727	-15.1085	-0.654329	Hypoxia	EndoCap-a
TAGTTGGAGAGACTTA_10X_Hypoxia_20181212	-15.9495	0.0440694	Hypoxia	EndoCap-a
CATCGGGAGCCCAGCT_10X_Hypoxia_20180727	-14.1117	-0.394305	Hypoxia	EndoCap-a
CTCGTCATCGAATGCT_10X_Hypoxia_20181212	-13.2707	0.269996	Hypoxia	EndoCap-a
GCACATAGTAATCACC_10X_Hypoxia_20180727	-16.1635	0.283183	Hypoxia	EndoCap-a
CAGCTAAAGATGTAAC_10X_Hypoxia_20181212	-15.5905	-0.422074	Hypoxia	EndoCap-a
CGCTGGATCTACTCAT_10X_Control_20181213	-15.9034	0.547921	Control	EndoCap-a
CGTCACTCATGCAATC_10X_Hypoxia_20180727	-15.6311	0.672496	Hypoxia	EndoCap-a
ACTTTCAGTTCCCTTG_10X_Control_20181212	-16.0645	0.864131	Control	EndoCap-a
TGCCCTATCATGTGGT_10X_Hypoxia_20181213	-13.4947	-0.74256	Hypoxia	EndoCap-a
TTTCCTCCACTATCTT_10X_Hypoxia_20181213	-16.1665	1.16683	Hypoxia	EndoCap-a
TTCTCAAAGCTGTCTA_10X_Hypoxia_20181213	-15.7045	0.609155	Hypoxia	EndoCap-a
GACCTGGAGGACTGGT_10X_Hypoxia_20180727	-15.3087	0.990648	Hypoxia	EndoCap-a
ACCGTAACATCGGACC_10X_Hypoxia_20180727	-14.8922	-0.432995	Hypoxia	EndoCap-a
GCGCGATCATCAGTAC_10X_Hypoxia_20180727	-15.7028	-0.567589	Hypoxia	EndoCap-a
TTGTAGGCAAGTCTGT_10X_Hypoxia_20180727	-14.8803	0.230249	Hypoxia	EndoCap-a
TTTGGTTCATTCCTGC_10X_Hypoxia_20181212	-14.4513	1.3063	Hypoxia	EndoCap-a
GCATGTAAGAAACCGC_10X_Hypoxia_20181213	-14.2714	1.55612	Hypoxia	EndoCap-a
CACATTTTCTTTAGGG_10X_Control_20181212	-15.9848	-0.684627	Control	EndoCap-a
ACTTTCAAGCGAGAAA_10X_Hypoxia_20181213	-15.7354	-0.686375	Hypoxia	EndoCap-a
TGGCTGGGTAGCCTAT_10X_Hypoxia_20181213	-16.1738	0.172856	Hypoxia	EndoCap-a
CGCTATCTCTGGCGAC_10X_Hypoxia_20180727	-14.3229	1.09966	Hypoxia	EndoCap-a
CGTCACTTCAACGAAA_10X_Hypoxia_20180727	-13.5636	-1.12556	Hypoxia	EndoCap-a
GTGTGCGGTTTGTTGG_10X_Hypoxia_20180727	-15.2457	0.581508	Hypoxia	EndoCap-a
CTCATTATCCAAAGTC_10X_Hypoxia_20181213	-13.9063	-0.10999	Hypoxia	EndoCap-a
CCATTCGCAGCGTTCG_10X_Hypoxia_20181212	-13.5045	0.331349	Hypoxia	EndoCap-a
TGAGCCGTCCAAAGTC_10X_Hypoxia_20181212	-14.8614	1.29966	Hypoxia	EndoCap-a
GTATCTTTCCAAGTAC_10X_Hypoxia_20181213	-14.5365	0.828323	Hypoxia	EndoCap-a
CTCTACGGTAGCGTCC_10X_Control_20180727	-13.9668	1.06353	Control	EndoCap-a
TTGCGTCCATTGAGCT_10X_Hypoxia_20180727	-15.5956	1.02098	Hypoxia	EndoCap-a
CTAGAGTGTATAGGTA_10X_Control_20181212	-14.5881	1.46926	Control	EndoCap-a
CGTCTACCAAGCCATT_10X_Hypoxia_20181212	-15.1213	-0.240564	Hypoxia	EndoCap-a
CTGATCCGTTAGGGTG_10X_Hypoxia_20180727	-15.5178	-0.895797	Hypoxia	EndoCap-a
AGGCCACCATTCACTT_10X_Hypoxia_20180727	-14.7552	-0.419775	Hypoxia	EndoCap-a
AGCGGTCCAACAACCT_10X_Hypoxia_20181213	-16.175	-0.0279342	Hypoxia	EndoCap-a
AGTGTCAAGCACCGTC_10X_Control_20181212	-16.3764	0.0516045	Control	EndoCap-a
CCTTTCTCAGGTCTCG_10X_Control_20181212	-15.3023	1.42155	Control	EndoCap-a
TTAGTTCTCTTACCGC_10X_Hypoxia_20181213	-16.307	0.183341	Hypoxia	EndoCap-a
CACCAGGGTGTTAAGA_10X_Control_20180727	-15.9614	1.58079	Control	EndoCap-a
GAAACTCAGCCAACAG_10X_Hypoxia_20180727	-14.7843	1.06639	Hypoxia	EndoCap-a
CACAAACAGCGAAGGG_10X_Hypoxia_20180727	-14.9615	0.913223	Hypoxia	EndoCap-a
CAGTCCTGTGTAATGA_10X_Control_20181212	-15.3057	1.4571	Control	EndoCap-a
TCGCGAGCATGGGAAC_10X_Hypoxia_20180727	-14.6959	-1.07397	Hypoxia	EndoCap-a
TAAACCGAGGAGCGAG_10X_Control_20180727	-14.5063	1.63951	Control	EndoCap-a
CAGCTAACAGCCTTTC_10X_Hypoxia_20181212	-15.9669	-0.347289	Hypoxia	EndoCap-a
CCAGCGAGTAATTGGA_10X_Hypoxia_20181213	-13.3256	-0.352574	Hypoxia	EndoCap-a
GTGTGCGGTATATGGA_10X_Hypoxia_20181212	-14.2163	1.0605	Hypoxia	EndoCap-a
TGGCGCATCCTGTACC_10X_Control_20181212	-15.8887	1.00133	Control	EndoCap-a
GGATGTTGTGCATCTA_10X_Control_20181212	-15.5327	1.39596	Control	EndoCap-a
AACTCTTAGGGCTTGA_10X_Control_20181212	-15.1352	1.55851	Control	EndoCap-a
CTCGGGAGTGTGGCTC_10X_Control_20180727	-16.351	0.745185	Control	EndoCap-a
GACACGCTCGCCCTTA_10X_Control_20181212	-14.8084	0.75614	Control	EndoCap-a
CTAGCCTTCAGGCCCA_10X_Control_20181212	-14.2923	0.686767	Control	EndoCap-a
TACTCGCAGCGACGTA_10X_Control_20180727	-16.4846	0.439657	Control	EndoCap-a
AGTTGGTTCTTAGAGC_10X_Hypoxia_20181213	-13.4418	-0.250197	Hypoxia	EndoCap-a
GTTAAGCGTTCCATGA_10X_Control_20180727	-14.586	1.86394	Control	EndoCap-a
TTTGTCATCGCGATCG_10X_Hypoxia_20181213	-14.1405	1.09774	Hypoxia	EndoCap-a
GACCTGGTCGTTGACA_10X_Hypoxia_20181212	-16.4373	-0.313208	Hypoxia	EndoCap-a
TATGCCCTCAGCCTAA_10X_Hypoxia_20180727	-15.3873	-0.0102198	Hypoxia	EndoCap-a
TGGGCGTTCGATCCCT_10X_Hypoxia_20181212	-13.6248	0.822925	Hypoxia	EndoCap-a
GTTACAGGTCCTGCTT_10X_Hypoxia_20181212	-14.0298	0.840245	Hypoxia	EndoCap-a
ACCTTTAGTACAGTTC_10X_Hypoxia_20181212	-14.7755	0.147207	Hypoxia	EndoCap-a
GTGCTTCCATCTCGCT_10X_Hypoxia_20180727	-14.3532	0.907465	Hypoxia	EndoCap-a
ACGAGCCTCTTTCCTC_10X_Hypoxia_20181213	-15.4072	-0.0705361	Hypoxia	EndoCap-a
ACTGAACAGCAAATCA_10X_Hypoxia_20181213	-15.694	0.844241	Hypoxia	EndoCap-a
TGCCCTACAAAGCGGT_10X_Hypoxia_20181212	-15.1115	-0.336366	Hypoxia	EndoCap-a
TTATGCTTCTCCGGTT_10X_Control_20181213	-16.484	0.457179	Control	EndoCap-a
CGGACGTTCACCTTAT_10X_Hypoxia_20181213	-13.8174	-0.346302	Hypoxia	EndoCap-a
ACGGAGATCGTTGACA_10X_Hypoxia_20181213	-16.0206	0.983763	Hypoxia	EndoCap-a
GCCAAATGTTCACGGC_10X_Hypoxia_20181212	-14.0385	1.83454	Hypoxia	EndoCap-a
CCCATACGTTCTCATT_10X_Hypoxia_20181212	-15.1192	1.40723	Hypoxia	EndoCap-a
GGTGCGTTCGCTAGCG_10X_Hypoxia_20181213	-14.8456	-0.109465	Hypoxia	EndoCap-a
ATTGGACAGTGTCCAT_10X_Hypoxia_20180727	-15.778	0.789059	Hypoxia	EndoCap-a
GTTCGGGTCCCATTAT_10X_Control_20180727	-14.9785	0.78723	Control	EndoCap-a
ATAACGCAGGGTTTCT_10X_Hypoxia_20180727	-16.2122	0.782182	Hypoxia	EndoCap-a
TGAGAGGAGGGCTCTC_10X_Hypoxia_20181213	-13.7	-0.755806	Hypoxia	EndoCap-a
CCTTCCCCAAGCCCAC_10X_Hypoxia_20181212	-14.5913	0.269566	Hypoxia	EndoCap-a
TACTTGTCACAGGCCT_10X_Hypoxia_20181212	-14.8788	1.22878	Hypoxia	EndoCap-a
CACCAGGGTAGCTGCC_10X_Control_20181212	-15.3603	0.716221	Control	EndoCap-a
TTGACTTAGATATGGT_10X_Control_20180727	-14.5372	1.89668	Control	EndoCap-a
TGAGAGGCACGGACAA_10X_Control_20181212	-15.249	0.185348	Control	EndoCap-a
CACCTTGAGACGACGT_10X_Hypoxia_20181212	-14.2678	2.07907	Hypoxia	EndoCap-a
GTGCGGTCATGGATGG_10X_Hypoxia_20181212	-14.812	0.8344	Hypoxia	EndoCap-a
AACTCAGTCATCTGTT_10X_Hypoxia_20181213	-15.1537	0.40366	Hypoxia	EndoCap-a
AGCAGCCCATACAGCT_10X_Hypoxia_20181213	-12.9964	2.10952	Hypoxia	EndoCap-a
CTCGGGAAGATAGGAG_10X_Hypoxia_20181212	-14.7409	0.773114	Hypoxia	EndoCap-a
AGCCTAATCGGCCGAT_10X_Hypoxia_20181212	-13.4663	0.0746122	Hypoxia	EndoCap-a
GTCCTCACAGACAAAT_10X_Hypoxia_20181213	-15.1323	-0.945385	Hypoxia	EndoCap-a
ACGCCAGAGGACATTA_10X_Hypoxia_20181212	-15.5247	-0.626471	Hypoxia	EndoCap-a
TGAGCATCAGCTGCTG_10X_Hypoxia_20181213	-13.3228	-0.385923	Hypoxia	EndoCap-a
CTTACCGCAGTGAGTG_10X_Control_20181212	-14.5479	1.07565	Control	EndoCap-a
AACTCAGGTCGGCACT_10X_Hypoxia_20180727	-13.4851	0.367021	Hypoxia	EndoCap-a
GCATGCGCAGCTGTTA_10X_Hypoxia_20181213	-13.8465	-0.867139	Hypoxia	EndoCap-a
GTGCATATCACATACG_10X_Hypoxia_20180727	-16.1841	0.283029	Hypoxia	EndoCap-a
CCTTACGTCCTGTAGA_10X_Hypoxia_20181212	-14.5403	0.31434	Hypoxia	EndoCap-a
ACGTCAAAGTCTCAAC_10X_Control_20181212	-14.2208	0.895959	Control	EndoCap-a
CATCGAAAGTGCCAGA_10X_Hypoxia_20181212	-14.7119	0.17013	Hypoxia	EndoCap-a
CACCAGGAGAGTAATC_10X_Hypoxia_20181213	-14.7735	-1.02099	Hypoxia	EndoCap-a
AAAGATGCAAACAACA_10X_Control_20180727	-14.3442	0.97311	Control	EndoCap-a
AGTGGGACAGTATCTG_10X_Hypoxia_20180727	-15.7084	0.49934	Hypoxia	EndoCap-a
ACATGGTCAGTGGAGT_10X_Hypoxia_20181212	-15.3402	-0.993731	Hypoxia	EndoCap-a
AACTTTCAGTACGATA_10X_Control_20181212	-14.1651	-0.0229411	Control	EndoCap-a
GAACGGAGTACGCTGC_10X_Hypoxia_20181212	-13.7292	-0.622981	Hypoxia	EndoCap-a
TGTGTTTGTATCGCAT_10X_Hypoxia_20180727	-14.472	-0.274558	Hypoxia	EndoCap-a
ATGAGGGAGAAACCTA_10X_Control_20180727	-14.2461	1.26062	Control	EndoCap-a
TCACAAGTCGCTTGTC_10X_Hypoxia_20180727	-13.9056	0.189869	Hypoxia	EndoCap-a
CAACTAGGTCCGTGAC_10X_Hypoxia_20181212	-15.2711	1.4667	Hypoxia	EndoCap-a
TGACAACCATCCGCGA_10X_Control_20181212	-14.1495	0.262894	Control	EndoCap-a
TCGTAGACAATAACGA_10X_Control_20181212	-15.9503	0.846999	Control	EndoCap-a
CGCCAAGTCGAGGTAG_10X_Hypoxia_20180727	-16.021	0.176458	Hypoxia	EndoCap-a
CTCGTACTCCTCCTAG_10X_Hypoxia_20181212	-15.8591	-0.109598	Hypoxia	EndoCap-a
AGTTGGTTCCAAGTAC_10X_Hypoxia_20181212	-14.6216	0.334214	Hypoxia	EndoCap-a
CAGTAACTCTCGCATC_10X_Control_20181212	-14.916	1.35495	Control	EndoCap-a
CGCTGGATCAACACAC_10X_Hypoxia_20181213	-15.1971	1.27446	Hypoxia	EndoCap-a
TCGTACCGTGCTGTAT_10X_Hypoxia_20181212	-14.0373	-0.12076	Hypoxia	EndoCap-a
CATATGGCACGCATCG_10X_Hypoxia_20181213	-16.1902	0.128539	Hypoxia	EndoCap-a
TGTGGTATCGGCTTGG_10X_Hypoxia_20180727	-14.837	-0.067923	Hypoxia	EndoCap-a
GTACGTACACGGTGTC_10X_Hypoxia_20181213	-13.8296	-0.265335	Hypoxia	EndoCap-a
ATCTGCCAGATGTAAC_10X_Hypoxia_20181213	-15.0656	-1.10023	Hypoxia	EndoCap-a
TCACGAAAGAGATGAG_10X_Hypoxia_20181212	-14.6241	-0.70821	Hypoxia	EndoCap-a
ATTACTCGTTCGGCAC_10X_Hypoxia_20181213	-15.6116	-0.18772	Hypoxia	EndoCap-a
GGGACCTGTACCGGCT_10X_Control_20181212	-14.3511	0.766004	Control	EndoCap-a
AGGCCACGTAGAGGAA_10X_Hypoxia_20181213	-14.3963	0.895707	Hypoxia	EndoCap-a
CAACCAAGTATCAGTC_10X_Hypoxia_20180727	-14.5778	0.602698	Hypoxia	EndoCap-a
CTCCTAGGTTGCCTCT_10X_Control_20181213	-13.7678	1.06132	Control	EndoCap-a
TCTTCGGTCACGACTA_10X_Hypoxia_20181212	-14.5858	-0.16525	Hypoxia	EndoCap-a
CCTAGCTAGTCTCGGC_10X_Control_20180727	-13.9458	0.932648	Control	EndoCap-a
CTGCGGACAGGAATGC_10X_Hypoxia_20181212	-15.3504	0.569088	Hypoxia	EndoCap-a
CCGTTCATCTGTTGAG_10X_Control_20181212	-15.0669	0.393785	Control	EndoCap-a
GCCTCTAAGGGCTCTC_10X_Hypoxia_20181213	-13.6316	-0.169659	Hypoxia	EndoCap-a
ACCAGTATCCCTCAGT_10X_Control_20181212	-14.336	0.395208	Control	EndoCap-a
ACACCCTTCAGAGACG_10X_Hypoxia_20181212	-15.3473	-0.952447	Hypoxia	EndoCap-a
ATGCGATTCTGCTGCT_10X_Control_20180727	-15.4604	2.10075	Control	EndoCap-a
GAATGAAAGGATCGCA_10X_Hypoxia_20181213	-14.0925	-0.35734	Hypoxia	EndoCap-a
AGCAGCCGTACTCAAC_10X_Hypoxia_20180727	-16.4222	1.09565	Hypoxia	EndoCap-a
GCGAGAAAGACGCAAC_10X_Hypoxia_20180727	-13.9296	0.243902	Hypoxia	EndoCap-a
CCAGCGACAAATTGCC_10X_Hypoxia_20181213	-15.0474	0.385408	Hypoxia	EndoCap-a
TTTGTCATCCACGCAG_10X_Hypoxia_20180727	-15.1772	0.411038	Hypoxia	EndoCap-a
TACTTACGTACTCGCG_10X_Control_20180727	-16.2386	0.153205	Control	EndoCap-a
CGCGGTACATCGTCGG_10X_Hypoxia_20181213	-14.8578	-0.165094	Hypoxia	EndoCap-a
CAGCTAACATGGGACA_10X_Control_20181212	-15.4264	1.35956	Control	EndoCap-a
ATAACGCAGGTGCTAG_10X_Control_20180727	-16.0684	1.66634	Control	EndoCap-a
AGAATAGAGAGGTTGC_10X_Hypoxia_20180727	-13.7763	-0.0270483	Hypoxia	EndoCap-a
ATGCGATAGAAACCAT_10X_Hypoxia_20180727	-14.8179	-0.300662	Hypoxia	EndoCap-a
CATTATCTCACTGGGC_10X_Hypoxia_20181212	-15.9772	0.7337	Hypoxia	EndoCap-a
GGCCGATAGTCGTTTG_10X_Hypoxia_20181212	-13.7212	0.990446	Hypoxia	EndoCap-a
GGGAATGCATGGATGG_10X_Control_20180727	-15.6299	2.29122	Control	EndoCap-a
TGATTTCTCGTGGTCG_10X_Hypoxia_20181212	-15.622	0.644421	Hypoxia	EndoCap-a
CGGACGTCATACTACG_10X_Control_20181212	-15.6339	1.63978	Control	EndoCap-a
GTGAAGGAGATCTGAA_10X_Control_20181212	-14.9975	1.55207	Control	EndoCap-a
CGCTTCAGTTACCAGT_10X_Hypoxia_20181212	-15.4832	-0.0590899	Hypoxia	EndoCap-a
ACACCAAAGATGTGTA_10X_Hypoxia_20181212	-14.2025	-0.164455	Hypoxia	EndoCap-a
AAAGCAAAGATGTGTA_10X_Control_20180727	-14.9449	-0.142152	Control	EndoCap-a
TAGTGGTTCGGCTACG_10X_Hypoxia_20181213	-13.9367	0.557933	Hypoxia	EndoCap-a
CGCTGGAAGACTAAGT_10X_Control_20180727	-13.8455	1.40224	Control	EndoCap-a
ACATCAGAGGGAGTAA_10X_Control_20180727	-15.9106	-0.0305575	Control	EndoCap-a
TGGCGCACAAGGACTG_10X_Control_20180727	-16.0306	1.72132	Control	EndoCap-a
GTGTTAGTCAGCTCTC_10X_Hypoxia_20180727	-15.3348	-0.0440953	Hypoxia	EndoCap-a
TAGGCATGTATGGTTC_10X_Control_20181212	-15.2933	1.03954	Control	EndoCap-a
AGTCTTTTCTGTCTAT_10X_Hypoxia_20181212	-13.6018	0.92395	Hypoxia	EndoCap-a
CGGACACGTACCGTAT_10X_Hypoxia_20181212	-14.4591	-0.13664	Hypoxia	EndoCap-a
CATATGGCAGACGCTC_10X_Hypoxia_20180727	-13.1627	-0.504109	Hypoxia	EndoCap-a
CACACTCCAGCTCGCA_10X_Control_20180727	-15.2176	0.125899	Control	EndoCap-a
TACGGTAGTGCTAGCC_10X_Hypoxia_20181213	-15.9151	0.247367	Hypoxia	EndoCap-a
TTAGGCAAGACTAGGC_10X_Hypoxia_20180727	-16.3109	0.654899	Hypoxia	EndoCap-a
AGACGTTAGCTACCGC_10X_Hypoxia_20181213	-15.1169	-0.178151	Hypoxia	EndoCap-a
GGTGCGTCATCGGTTA_10X_Control_20180727	-16.1352	1.63705	Control	EndoCap-a
TACCTATGTACGAAAT_10X_Hypoxia_20181213	-15.0065	-0.773975	Hypoxia	EndoCap-a
GTGGGTCCAATGCCAT_10X_Control_20181212	-15.2172	1.55787	Control	EndoCap-a
GTGTTAGAGTGTTGAA_10X_Hypoxia_20181213	-15.2189	0.365341	Hypoxia	EndoCap-a
TTGGAACTCAAACAAG_10X_Hypoxia_20180727	-15.3231	-0.213235	Hypoxia	EndoCap-a
ACTGATGAGCGTGTCC_10X_Hypoxia_20181213	-15.131	1.0729	Hypoxia	EndoCap-a
GACTAACGTCGCGTGT_10X_Hypoxia_20180727	-15.6867	1.19603	Hypoxia	EndoCap-a
GAATGAAGTAGTGAAT_10X_Control_20180727	-15.7105	1.5062	Control	EndoCap-a
GATCGTAGTTTCCACC_10X_Hypoxia_20180727	-15.0872	-0.607865	Hypoxia	EndoCap-a
CTCGAAAAGTGGCACA_10X_Hypoxia_20181213	-13.6696	0.45327	Hypoxia	EndoCap-a
GACTGCGAGCCGTCGT_10X_Hypoxia_20180727	-15.5314	0.887299	Hypoxia	EndoCap-a
CCGTACTTCTTGCATT_10X_Hypoxia_20180727	-13.5947	0.691863	Hypoxia	EndoCap-a
CACCACTAGCAGATCG_10X_Hypoxia_20181212	-14.0585	0.910124	Hypoxia	EndoCap-a
GGGAGATCATGAGCGA_10X_Control_20180727	-15.1158	1.54135	Control	EndoCap-a
ACTTGTTAGCTAAGAT_10X_Control_20180727	-14.6583	0.673199	Control	EndoCap-a
CCCATACTCGTCTGCT_10X_Control_20180727	-15.3808	1.37679	Control	EndoCap-a
CGATTGACAGACAGGT_10X_Hypoxia_20180727	-15.002	0.230168	Hypoxia	EndoCap-a
TTAGGACAGGCAATTA_10X_Hypoxia_20181213	-14.9846	-0.480471	Hypoxia	EndoCap-a
CTACACCAGTCGTACT_10X_Control_20181212	-14.847	-0.449446	Control	EndoCap-a
CCTAAAGAGTGAATTG_10X_Hypoxia_20180727	-15.7744	0.080193	Hypoxia	EndoCap-a
TCGTAGACAATTCCTT_10X_Control_20181212	-14.7397	0.695375	Control	EndoCap-a
TGCCCATCAAAGGAAG_10X_Hypoxia_20181213	-13.7052	-0.717365	Hypoxia	EndoCap-a
CATCAGATCCCTTGCA_10X_Hypoxia_20181213	-13.4484	-0.00537843	Hypoxia	EndoCap-a
TCTGGAAAGAGCTATA_10X_Control_20181212	-15.0829	0.820041	Control	EndoCap-a
GTGGGTCGTGGAAAGA_10X_Hypoxia_20181212	-15.5788	0.63887	Hypoxia	EndoCap-a
CTTGGCTCACAGCGTC_10X_Hypoxia_20181213	-14.4567	-0.510233	Hypoxia	EndoCap-a
GGGTTGCTCAGAGCTT_10X_Hypoxia_20180727	-15.7796	-0.0747632	Hypoxia	EndoCap-a
TCAATCTGTGGGTCAA_10X_Hypoxia_20181213	-15.3019	-0.667084	Hypoxia	EndoCap-a
AGCTCCTAGACTAGGC_10X_Hypoxia_20181213	-13.5862	-0.564602	Hypoxia	EndoCap-a
GGCTGGTGTGCACCAC_10X_Hypoxia_20181212	-13.4931	1.00195	Hypoxia	EndoCap-a
CGCTGGAAGGGATCTG_10X_Hypoxia_20181212	-13.6935	-0.0633162	Hypoxia	EndoCap-a
TTTACTGTCAGAGGTG_10X_Hypoxia_20180727	-14.738	-0.163895	Hypoxia	EndoCap-a
CTAGAGTCAGGCGATA_10X_Hypoxia_20180727	-15.6234	1.66538	Hypoxia	EndoCap-a
CGTGAGCCAAGTCATC_10X_Hypoxia_20180727	-14.7319	-0.640159	Hypoxia	EndoCap-a
CGGACTGGTGCATCTA_10X_Hypoxia_20181212	-13.6311	0.329165	Hypoxia	EndoCap-a
CGTCAGGAGTTAGGTA_10X_Hypoxia_20181213	-13.8447	-0.441237	Hypoxia	EndoCap-a
GCTGCGATCCCAGGTG_10X_Hypoxia_20181212	-15.9682	0.961383	Hypoxia	EndoCap-a
GCTGGGTGTGGCTCCA_10X_Control_20180727	-16.1752	1.07967	Control	EndoCap-a
GCACTCTGTCATACTG_10X_Hypoxia_20180727	-15.069	-0.850879	Hypoxia	EndoCap-a
AGCTCCTAGCCCTAAT_10X_Hypoxia_20181213	-15.5466	1.87862	Hypoxia	EndoCap-a
TGACTAGAGAGTGACC_10X_Control_20180727	-15.2329	0.406327	Control	EndoCap-a
CTCACACTCAGCTCTC_10X_Hypoxia_20181212	-14.5861	1.22742	Hypoxia	EndoCap-a
TCTCTAAGTAGAAAGG_10X_Hypoxia_20180727	-14.5532	-0.409314	Hypoxia	EndoCap-a
GCTCTGTGTCTGCCAG_10X_Hypoxia_20181213	-14.3803	0.615785	Hypoxia	EndoCap-a
ATGGGAGCAGTCGATT_10X_Hypoxia_20180727	-14.449	0.236357	Hypoxia	EndoCap-a
CTAAGACAGGCTAGGT_10X_Control_20180727	-15.9963	0.698105	Control	EndoCap-a
GTCGGGTTCCAGAAGG_10X_Hypoxia_20181213	-13.2986	-0.116315	Hypoxia	EndoCap-a
CGTTGGGGTGTGCGTC_10X_Hypoxia_20181212	-15.086	-0.659753	Hypoxia	EndoCap-a
CTTACCGGTGCACCAC_10X_Hypoxia_20180727	-15.4344	0.175143	Hypoxia	EndoCap-a
ACGGGCTTCGTATCAG_10X_Hypoxia_20181212	-15.1602	-0.303923	Hypoxia	EndoCap-a
AGGGAGTAGGTGTTAA_10X_Hypoxia_20181212	-13.4346	-1.19154	Hypoxia	EndoCap-a
CCACCTATCTAACCGA_10X_Control_20180727	-14.1555	1.30511	Control	EndoCap-a
CGTCACTCACGTGAGA_10X_Hypoxia_20180727	-14.832	0.0474982	Hypoxia	EndoCap-a
GCAGTTACAGTGAGTG_10X_Hypoxia_20181212	-14.0798	-0.452606	Hypoxia	EndoCap-a
GGCAATTCACCCAGTG_10X_Hypoxia_20180727	-14.9647	-0.540387	Hypoxia	EndoCap-a
TACGGTACAAGGTTTC_10X_Control_20181212	-16.1583	1.80364	Control	EndoCap-a
CCCTCCTGTTTCGCTC_10X_Hypoxia_20181213	-15.919	-0.195245	Hypoxia	EndoCap-a
CTGCGGAAGAACTCGG_10X_Control_20181212	-14.7259	1.9665	Control	EndoCap-a
TACGGTAAGATGTGTA_10X_Hypoxia_20181213	-15.8761	0.852542	Hypoxia	EndoCap-a
CCTCTGAGTTCAGCGC_10X_Hypoxia_20181213	-13.5946	1.0728	Hypoxia	EndoCap-a
TACGGGCTCGAACTGT_10X_Hypoxia_20181212	-14.6961	-0.616679	Hypoxia	EndoCap-a
GATGCTAAGGCGCTCT_10X_Hypoxia_20180727	-14.4594	-0.254498	Hypoxia	EndoCap-a
CTGAAGTAGTGTTAGA_10X_Hypoxia_20181212	-15.0803	0.105305	Hypoxia	EndoCap-a
ATTGGACGTCACTGGC_10X_Hypoxia_20180727	-14.2269	0.110034	Hypoxia	EndoCap-a
GGTGCGTCAGATGGCA_10X_Control_20180727	-13.8904	1.28902	Control	EndoCap-a
TTAGGCAAGATGAGAG_10X_Control_20181212	-14.7247	0.260998	Control	EndoCap-a
TGCTACCGTGTTGGGA_10X_Hypoxia_20180727	-15.2937	-0.0240254	Hypoxia	EndoCap-a
TTTACTGGTAAATGAC_10X_Hypoxia_20181212	-15.8395	1.42651	Hypoxia	EndoCap-a
GTGGGTCCAACTGGCC_10X_Hypoxia_20181212	-13.5187	-0.0604376	Hypoxia	EndoCap-a
CTAACTTGTAAGCACG_10X_Hypoxia_20181213	-14.048	-0.0744153	Hypoxia	EndoCap-a
AACTCTTTCACATACG_10X_Hypoxia_20181213	-14.5237	-0.307876	Hypoxia	EndoCap-a
TATTACCGTTACAGAA_10X_Hypoxia_20180727	-14.1435	0.636671	Hypoxia	EndoCap-a
CTGTGCTCAGCGTTCG_10X_Control_20180727	-15.043	1.88592	Control	EndoCap-a
AGCATACGTCATATGC_10X_Hypoxia_20180727	-13.4528	0.559256	Hypoxia	EndoCap-a
CCTACCAGTTATTCTC_10X_Hypoxia_20180727	-13.8619	-0.230724	Hypoxia	EndoCap-a
TGCCCATAGGTGATTA_10X_Control_20181212	-15.1597	1.13597	Control	EndoCap-a
CCTAGCTTCTGGCGAC_10X_Control_20180727	-13.9916	0.0361829	Control	EndoCap-a
AAGGCAGCATCCGTGG_10X_Control_20180727	-16.3471	0.157215	Control	EndoCap-a
ATGCGATAGAGGTAGA_10X_Hypoxia_20181212	-13.477	0.214234	Hypoxia	EndoCap-a
GGACATTAGACCTAGG_10X_Control_20181212	-15.9223	0.941436	Control	EndoCap-a
AACACGTGTTAAGATG_10X_Control_20180727	-15.4478	0.443099	Control	EndoCap-a
AAAGCAATCGGTCTAA_10X_Hypoxia_20181213	-15.5328	0.38295	Hypoxia	EndoCap-a
CAAGAAAAGAGAGCTC_10X_Hypoxia_20181213	-15.0416	0.514735	Hypoxia	EndoCap-a
CGACCTTGTAATAGCA_10X_Hypoxia_20180727	-14.6979	0.495379	Hypoxia	EndoCap-a
CAGCGACGTAAACACA_10X_Hypoxia_20181212	-15.2293	1.40212	Hypoxia	EndoCap-a
CTCGGGAAGTGTTGAA_10X_Hypoxia_20180727	-15.7518	0.859298	Hypoxia	EndoCap-a
TTTACTGAGCTAACAA_10X_Control_20181212	-14.2523	0.170012	Control	EndoCap-a
ATTGGTGAGGTGATTA_10X_Hypoxia_20181212	-13.6089	0.300306	Hypoxia	EndoCap-a
TCAGATGTCTAACTTC_10X_Hypoxia_20181212	-14.3878	-0.754668	Hypoxia	EndoCap-a
TGCTACCTCATACGGT_10X_Hypoxia_20181212	-13.6846	1.00189	Hypoxia	EndoCap-a
CGTCACTGTCATACTG_10X_Control_20181212	-14.7073	1.27199	Control	EndoCap-a
TGAGAGGGTAGTGAAT_10X_Hypoxia_20180727	-13.7982	-0.68728	Hypoxia	EndoCap-a
GTAACTGTCTCCAACC_10X_Hypoxia_20181212	-16.1735	-0.237838	Hypoxia	EndoCap-a
CTACGTCGTAGGAGTC_10X_Hypoxia_20180727	-13.2355	1.72332	Hypoxia	EndoCap-a
AACGTTGGTACTCTCC_10X_Control_20181212	-14.7052	0.618864	Control	EndoCap-a
TCAGCAAAGTCAAGCG_10X_Hypoxia_20181213	-13.9738	0.0619389	Hypoxia	EndoCap-a
AACACGTTCGCAAGCC_10X_Control_20180727	-15.3809	2.09534	Control	EndoCap-a
ATCTACTCAATCGGTT_10X_Hypoxia_20181212	-15.8685	0.897891	Hypoxia	EndoCap-a
ATAGACCAGAGACGAA_10X_Hypoxia_20180727	-15.4875	0.142379	Hypoxia	EndoCap-a
CTCGTCACATGGTTGT_10X_Control_20181212	-14.7732	1.54196	Control	EndoCap-a
TATTACCGTCTCTTTA_10X_Control_20181212	-15.2674	1.82462	Control	EndoCap-a
GATCGTAGTATGGTTC_10X_Control_20180727	-14.8056	0.289196	Control	EndoCap-a
TTGACTTTCCAACCAA_10X_Control_20181212	-15.3905	0.341433	Control	EndoCap-a
GTGTTAGGTCTGATTG_10X_Control_20181212	-16.1466	0.627756	Control	EndoCap-a
GGCCGATGTAAGTGGC_10X_Control_20181212	-16.0667	0.261092	Control	EndoCap-a
ACTGAGTTCGAGAGCA_10X_Hypoxia_20180727	-16.2228	0.520766	Hypoxia	EndoCap-a
TCAGCAACACCAACCG_10X_Control_20181213	-15.6805	1.40289	Control	EndoCap-a
AGTCTTTAGCGTTTAC_10X_Hypoxia_20181213	-13.7865	-0.965681	Hypoxia	EndoCap-a
AATCCAGTCATTATCC_10X_Hypoxia_20181212	-16.4692	0.474486	Hypoxia	EndoCap-a
ACAGCCGAGTGAACAT_10X_Hypoxia_20181212	-15.152	-0.518362	Hypoxia	EndoCap-a
TGGCCAGTCCTGCCAT_10X_Hypoxia_20181213	-15.4458	0.691911	Hypoxia	EndoCap-a
GTACTTTAGACAATAC_10X_Control_20180727	-14.2189	0.953333	Control	EndoCap-a
CTCGTACCAACTGCTA_10X_Control_20181212	-15.9145	1.30367	Control	EndoCap-a
TACAGTGCAGTGAGTG_10X_Hypoxia_20180727	-13.4264	-0.47941	Hypoxia	EndoCap-a
TTGACTTTCTGTCTAT_10X_Control_20181212	-14.9592	1.87542	Control	EndoCap-a
CAGGTGCGTACAGACG_10X_Hypoxia_20181213	-15.4902	0.703584	Hypoxia	EndoCap-a
CTAAGACCAATAAGCA_10X_Hypoxia_20181213	-16.0887	0.83191	Hypoxia	EndoCap-a
GTTCGGGTCTCTGCTG_10X_Control_20180727	-13.949	-0.0769083	Control	EndoCap-a
GCATGTAGTCATACTG_10X_Hypoxia_20181213	-13.5016	-0.451928	Hypoxia	EndoCap-a
ACGGGCTCACGGATAG_10X_Hypoxia_20181213	-15.4217	-0.375025	Hypoxia	EndoCap-a
TACTTACAGGACCACA_10X_Hypoxia_20180727	-15.8469	0.845018	Hypoxia	EndoCap-a
TGACAACCAGAGTGTG_10X_Hypoxia_20181213	-13.2853	0.520153	Hypoxia	EndoCap-a
GTGCAGCGTGTTGAGG_10X_Control_20180727	-15.2641	1.2809	Control	EndoCap-a
CCATTCGTCGGATGGA_10X_Hypoxia_20180727	-15.4343	-0.477189	Hypoxia	EndoCap-a
CTCTGGTCAAACGCGA_10X_Hypoxia_20180727	-15.7216	1.20761	Hypoxia	EndoCap-a
CCTCTGATCCTTGCCA_10X_Hypoxia_20181213	-14.0683	0.346715	Hypoxia	EndoCap-a
AGCGTATCACACTGCG_10X_Control_20181212	-16.3523	1.24627	Control	EndoCap-a
CTAATGGAGAATGTTG_10X_Hypoxia_20181213	-15.6357	0.770806	Hypoxia	EndoCap-a
CTCATTAAGACACTAA_10X_Hypoxia_20180727	-15.66	-0.256079	Hypoxia	EndoCap-a
AAGTCTGAGTAGGTGC_10X_Control_20181212	-14.9711	1.56299	Control	EndoCap-a
AACCGCGGTGGTCTCG_10X_Hypoxia_20181212	-15.8321	0.927257	Hypoxia	EndoCap-a
ATTGGACCATCCTAGA_10X_Hypoxia_20180727	-13.3652	0.25818	Hypoxia	EndoCap-a
AGCAGCCGTCCTCTTG_10X_Control_20180727	-15.5688	1.38141	Control	EndoCap-a
TGGCGCAAGACGCAAC_10X_Hypoxia_20181213	-13.5901	0.404232	Hypoxia	EndoCap-a
CACATTTTCTGGTATG_10X_Hypoxia_20180727	-14.7946	-0.191169	Hypoxia	EndoCap-a
CACCTTGCATGGGACA_10X_Hypoxia_20181212	-13.9442	1.70667	Hypoxia	EndoCap-a
ATAAGAGTCGCTGATA_10X_Control_20181213	-15.3057	1.80711	Control	EndoCap-a
TACAGTGGTGCTGTAT_10X_Hypoxia_20180727	-14.9561	-0.308696	Hypoxia	EndoCap-a
CCTTCGAGTACCCAAT_10X_Control_20180727	-15.9893	0.385109	Control	EndoCap-a
GTGCAGCCAATGCCAT_10X_Hypoxia_20181212	-14.6693	-0.4673	Hypoxia	EndoCap-a
TCTATTGAGAAGGTTT_10X_Hypoxia_20181213	-13.4372	-0.224344	Hypoxia	EndoCap-a
CTGATAGTCATTGCGA_10X_Hypoxia_20180727	-15.3101	-0.369723	Hypoxia	EndoCap-a
GATCGTACAAGTAGTA_10X_Hypoxia_20180727	-15.9436	-0.438599	Hypoxia	EndoCap-a
GACGGCTTCTGTCAAG_10X_Hypoxia_20181212	-14.9489	0.536391	Hypoxia	EndoCap-a
GCCAAATAGCTGTTCA_10X_Control_20180727	-14.6675	1.82075	Control	EndoCap-a
TCTTTCCGTAATCGTC_10X_Hypoxia_20181213	-15.4153	-0.847141	Hypoxia	EndoCap-a
TTCTTAGAGATAGGAG_10X_Control_20181212	-15.2016	0.292931	Control	EndoCap-a
TCGCGTTTCGCGGATC_10X_Hypoxia_20180727	-15.3961	1.81655	Hypoxia	EndoCap-a
GTGCGGTAGATCGGGT_10X_Hypoxia_20180727	-14.3285	0.646331	Hypoxia	EndoCap-a
AGGTCATGTGCTTCTC_10X_Hypoxia_20181213	-15.2431	0.872435	Hypoxia	EndoCap-a
CAAGATCGTGTTAAGA_10X_Control_20180727	-15.2223	1.22664	Control	EndoCap-a
CACTCCAGTCCTAGCG_10X_Hypoxia_20181212	-13.7313	0.0455901	Hypoxia	EndoCap-a
ACGGGTCTCGTACGGC_10X_Hypoxia_20181213	-15.2123	0.602587	Hypoxia	EndoCap-a
TGAAAGATCCGCATAA_10X_Hypoxia_20180727	-15.2207	-0.995123	Hypoxia	EndoCap-a
CAGCATACAAATCCGT_10X_Hypoxia_20180727	-14.6176	0.490931	Hypoxia	EndoCap-a
CCACCTAAGCCAGGAT_10X_Hypoxia_20181213	-15.925	0.433871	Hypoxia	EndoCap-a
ATCCGAACAAGAGTCG_10X_Hypoxia_20181212	-15.8397	1.60466	Hypoxia	EndoCap-a
TCTTTCCTCAGTTCGA_10X_Control_20181213	-13.858	1.2978	Control	EndoCap-a
GGTGTTATCGGTTAAC_10X_Control_20180727	-15.7346	1.39752	Control	EndoCap-a
TGAGGGATCCAACCAA_10X_Hypoxia_20180727	-14.6228	0.0461279	Hypoxia	EndoCap-a
CGTGTAAGTCCATGAT_10X_Control_20180727	-14.5422	0.785104	Control	EndoCap-a
GACCTGGCAAGGTTCT_10X_Hypoxia_20180727	-13.8139	-0.778283	Hypoxia	EndoCap-a
GCAATCATCGGTCCGA_10X_Hypoxia_20180727	-14.916	-0.804041	Hypoxia	EndoCap-a
CGCCAAGCAAGCGTAG_10X_Hypoxia_20180727	-15.491	0.093945	Hypoxia	EndoCap-a
CAGCCGACAAGCCGCT_10X_Control_20181213	-15.5756	1.49273	Control	EndoCap-a
TTTGTCAAGAAACGCC_10X_Control_20181213	-16.125	1.18492	Control	EndoCap-a
CTGATCCGTGTGACGA_10X_Hypoxia_20181213	-14.4586	-0.520093	Hypoxia	EndoCap-a
GGTGTTACAGTATAAG_10X_Control_20180727	-13.3421	0.191563	Control	EndoCap-a
GCGAGAAAGTCGTTTG_10X_Control_20181212	-14.8725	1.1427	Control	EndoCap-a
AGCTCCTGTCTCTCGT_10X_Hypoxia_20180727	-13.4798	-0.509653	Hypoxia	EndoCap-a
TAGAGCTCAGCTGGCT_10X_Control_20181212	-15.9686	1.65033	Control	EndoCap-a
GCGGGTTAGCCTCGTG_10X_Hypoxia_20181212	-14.9193	0.0624204	Hypoxia	EndoCap-a
AACCGCGAGCGGATCA_10X_Hypoxia_20180727	-14.803	0.712058	Hypoxia	EndoCap-a
CGGAGCTAGTGCGATG_10X_Control_20181212	-15.3697	0.618802	Control	EndoCap-a
CATCGAATCCAGATCA_10X_Hypoxia_20181212	-15.4897	0.610693	Hypoxia	EndoCap-a
ACACCAAAGGTAGCTG_10X_Hypoxia_20180727	-16.1089	-0.497552	Hypoxia	EndoCap-a
ATTTCTGTCTTTACAC_10X_Hypoxia_20180727	-15.874	-0.220606	Hypoxia	EndoCap-a
AGGGATGTCAAGCCTA_10X_Hypoxia_20181213	-14.0253	0.456947	Hypoxia	EndoCap-a
CCACCTAGTGCGAAAC_10X_Hypoxia_20180727	-14.2304	-0.694349	Hypoxia	EndoCap-a
GCTTGAACAGTGAGTG_10X_Hypoxia_20180727	-14.9672	0.086416	Hypoxia	EndoCap-a
TGCACCTTCCGTCATC_10X_Hypoxia_20181213	-14.4043	-0.113031	Hypoxia	EndoCap-a
TGTGTTTTCGTTGACA_10X_Hypoxia_20181212	-14.3186	-0.750568	Hypoxia	EndoCap-a
TACACGATCCAGAAGG_10X_Control_20180727	-15.3473	0.21203	Control	EndoCap-a
GTATTCTAGCGCTTAT_10X_Hypoxia_20180727	-14.2859	-0.170842	Hypoxia	EndoCap-a
CACATTTGTCGATTGT_10X_Hypoxia_20180727	-14.8159	1.14916	Hypoxia	EndoCap-a
GTGTGCGGTTCCACGG_10X_Hypoxia_20181212	-15.5374	-0.348553	Hypoxia	EndoCap-a
CTTGGCTTCCAGGGCT_10X_Hypoxia_20180727	-15.1899	0.143546	Hypoxia	EndoCap-a
GAAGCAGTCACAACGT_10X_Hypoxia_20180727	-14.9504	0.235274	Hypoxia	EndoCap-a
AGGTCATAGTGACTCT_10X_Hypoxia_20181213	-13.9843	-0.537399	Hypoxia	EndoCap-a
GAGGTGACAGACGTAG_10X_Hypoxia_20181212	-15.7655	-0.487922	Hypoxia	EndoCap-a
CACCTTGAGTATCTCG_10X_Control_20181212	-15.6323	1.09336	Control	EndoCap-a
AAACGGGAGTGCCAGA_10X_Hypoxia_20180727	-15.3538	-0.233789	Hypoxia	EndoCap-a
TCTCATACATGTCTCC_10X_Hypoxia_20181212	-14.1592	1.01821	Hypoxia	EndoCap-a
AAAGATGCATGCTAGT_10X_Control_20181212	-15.1841	0.523037	Control	EndoCap-a
CTAGCCTCATTTGCCC_10X_Hypoxia_20180727	-16.0019	0.514769	Hypoxia	EndoCap-a
CATATTCTCGCCAGCA_10X_Control_20180727	-15.6509	1.22835	Control	EndoCap-a
TTGCGTCCATTTCACT_10X_Control_20180727	-14.7491	1.61739	Control	EndoCap-a
GAAATGACATTTGCTT_10X_Control_20180727	-15.2518	1.59778	Control	EndoCap-a
ACCAGTACATTAACCG_10X_Hypoxia_20181213	-14.9214	0.503861	Hypoxia	EndoCap-a
AGAGCGAAGAAACCAT_10X_Hypoxia_20180727	-13.6566	0.373655	Hypoxia	EndoCap-a
CTCGAGGCATAAGACA_10X_Hypoxia_20181213	-14.0467	0.193909	Hypoxia	EndoCap-a
GAATAAGAGTGGTAGC_10X_Control_20181212	-15.1294	1.38203	Control	EndoCap-a
GGCCGATCAAGAAGAG_10X_Hypoxia_20181213	-14.7271	0.2058	Hypoxia	EndoCap-a
GTAACTGTCTATCCTA_10X_Hypoxia_20180727	-14.1097	-0.696501	Hypoxia	EndoCap-a
CGAGAAGTCTTGACGA_10X_Hypoxia_20180727	-14.2469	0.80998	Hypoxia	EndoCap-a
CCCTCCTCATTTGCCC_10X_Hypoxia_20181213	-13.7293	-0.0183296	Hypoxia	EndoCap-a
AAGGAGCTCCAAGTAC_10X_Hypoxia_20181212	-16.0748	0.186633	Hypoxia	EndoCap-a
CTAACTTAGCCGGTAA_10X_Hypoxia_20181212	-14.9419	0.556958	Hypoxia	EndoCap-a
TCGAGGCCATCATCCC_10X_Hypoxia_20181212	-15.2741	1.70432	Hypoxia	EndoCap-a
TCACAAGGTACCGCTG_10X_Hypoxia_20180727	-15.561	0.0548931	Hypoxia	EndoCap-a
TATCAGGTCGAGAACG_10X_Control_20180727	-15.3992	2.10616	Control	EndoCap-a
GTAGTCAAGCCATCGC_10X_Control_20181212	-15.3311	-0.746176	Control	EndoCap-a
AAGGCAGAGAGCTGCA_10X_Control_20181212	-13.855	1.02964	Control	EndoCap-a
TGCGCAGGTAGGACAC_10X_Control_20180727	-15.9911	1.27519	Control	EndoCap-a
AAAGCAATCCGCGGTA_10X_Hypoxia_20181212	-15.597	0.514472	Hypoxia	EndoCap-a
GTCTTCGTCTGCTTGC_10X_Control_20181213	-15.2942	1.65802	Control	EndoCap-a
ACATACGAGCATGGCA_10X_Control_20181212	-16.0916	0.112723	Control	EndoCap-a
GACTAACAGCGACGTA_10X_Control_20181212	-16.024	1.75702	Control	EndoCap-a
TCTTCGGCAGGGAGAG_10X_Control_20180727	-15.5974	1.42621	Control	EndoCap-a
ATCCGAACATGGTCTA_10X_Hypoxia_20180727	-15.0432	-0.550158	Hypoxia	EndoCap-a
AGCGTCGAGGGTTTCT_10X_Hypoxia_20180727	-16.0507	0.587533	Hypoxia	EndoCap-a
GGGAGATGTCCGAAGA_10X_Control_20180727	-13.6075	0.649228	Control	EndoCap-a
ATCTACTCAGTAACGG_10X_Hypoxia_20181212	-14.2358	0.00606628	Hypoxia	EndoCap-a
TTTCCTCTCCCGACTT_10X_Hypoxia_20180727	-15.7075	0.301719	Hypoxia	EndoCap-a
ACACTGACACCGAATT_10X_Hypoxia_20181213	-13.5908	0.602875	Hypoxia	EndoCap-a
AGATTGCCACAGTCGC_10X_Hypoxia_20180727	-13.3544	0.44125	Hypoxia	EndoCap-a
ATGAGGGGTCCGACGT_10X_Hypoxia_20181213	-15.3722	0.995438	Hypoxia	EndoCap-a
GCTGGGTTCCTTGCCA_10X_Hypoxia_20181212	-14.8313	1.55134	Hypoxia	EndoCap-a
GAGGTGAAGCGTGAGT_10X_Control_20180727	-15.917	1.51568	Control	EndoCap-a
GCATACACACTCGACG_10X_Hypoxia_20181212	-14.9909	1.19665	Hypoxia	EndoCap-a
CCATGTCGTGCTGTAT_10X_Hypoxia_20180727	-15.8509	0.988477	Hypoxia	EndoCap-a
CTCAGAACAATAGAGT_10X_Hypoxia_20180727	-13.871	1.47328	Hypoxia	EndoCap-a
CGATGTAAGGGCTTGA_10X_Control_20181212	-15.9263	0.796486	Control	EndoCap-a
TTATGCTCAATTCCTT_10X_Hypoxia_20181212	-14.6505	1.65335	Hypoxia	EndoCap-a
CTACCCATCGCTTAGA_10X_Hypoxia_20181212	-15.9524	0.655388	Hypoxia	EndoCap-a
GGGTCTGGTGTCAATC_10X_Control_20181213	-15.5828	-0.0809202	Control	EndoCap-a
GACCAATCAGGCTCAC_10X_Hypoxia_20180727	-14.0554	-0.706464	Hypoxia	EndoCap-a
CATATGGTCGCACTCT_10X_Hypoxia_20180727	-14.3433	-0.411936	Hypoxia	EndoCap-a
AAATGCCCAAGCCCAC_10X_Control_20181212	-15.0781	1.98324	Control	EndoCap-a
CAGCTAAGTCAAACTC_10X_Hypoxia_20180727	-13.7702	-0.827658	Hypoxia	EndoCap-a
AGTGAGGCAATCTACG_10X_Control_20181212	-15.5514	0.790658	Control	EndoCap-a
GGATTACCATGTAAGA_10X_Control_20181213	-15.5305	1.20751	Control	EndoCap-a
CGGACTGAGTGTCCAT_10X_Control_20181213	-15.7257	1.78773	Control	EndoCap-a
ACTGAGTCACGGTTTA_10X_Control_20181212	-14.2102	1.86718	Control	EndoCap-a
CAACCTCGTTCCACTC_10X_Hypoxia_20181213	-14.1895	0.572145	Hypoxia	EndoCap-a
GTCGTAAGTTTAGGAA_10X_Hypoxia_20180727	-14.789	-0.363073	Hypoxia	EndoCap-a
ACGGCCACATTCTTAC_10X_Hypoxia_20181213	-13.8852	-0.38789	Hypoxia	EndoCap-a
AGAGTGGGTCGATTGT_10X_Hypoxia_20180727	-14.1827	-0.175834	Hypoxia	EndoCap-a
GGCGACTAGGACATTA_10X_Control_20181212	-15.3536	1.43372	Control	EndoCap-a
GGAGCAACAGGTCGTC_10X_Control_20181212	-15.1747	1.61475	Control	EndoCap-a
TGTGGTATCGAATCCA_10X_Hypoxia_20180727	-14.8735	-0.0974972	Hypoxia	EndoCap-a
CGGTTAATCGTACCGG_10X_Hypoxia_20181213	-14.1054	0.995155	Hypoxia	EndoCap-a
CAGTCCTAGACCTTTG_10X_Hypoxia_20180727	-14.4396	1.00742	Hypoxia	EndoCap-a
CTGGTCTAGGCAGGTT_10X_Hypoxia_20181212	-14.9922	-0.55793	Hypoxia	EndoCap-a
GGAATAAGTCCCTTGT_10X_Hypoxia_20181213	-15.9735	1.11034	Hypoxia	EndoCap-a
TGAAAGAGTAGGACAC_10X_Control_20181212	-13.4464	0.715586	Control	EndoCap-a
CACAGTATCTTCGAGA_10X_Hypoxia_20180727	-13.8737	1.25352	Hypoxia	EndoCap-a
CCGTGGAGTGGTCCGT_10X_Control_20181212	-14.1817	1.02598	Control	EndoCap-a
CTCGGGAGTGATAAGT_10X_Hypoxia_20180727	-13.3804	-0.220348	Hypoxia	EndoCap-a
GTTCATTCATTGCGGC_10X_Hypoxia_20181213	-16.1179	0.280378	Hypoxia	EndoCap-a
CCGTGGAAGCGATCCC_10X_Control_20181212	-15.7005	1.25748	Control	EndoCap-a
GTATCTTGTACTCAAC_10X_Control_20180727	-15.5176	-0.160253	Control	EndoCap-a
CTGGTCTCAACCGCCA_10X_Hypoxia_20180727	-13.7111	0.127199	Hypoxia	EndoCap-a
TATCTCACAATGGTCT_10X_Hypoxia_20181212	-15.1991	-0.720533	Hypoxia	EndoCap-a
ATGGGAGTCGTAGATC_10X_Control_20180727	-15.5797	0.992663	Control	EndoCap-a
CTCGGGAGTCTCCACT_10X_Hypoxia_20181212	-16.0935	0.753068	Hypoxia	EndoCap-a
TACTCGCGTAAACGCG_10X_Control_20180727	-15.0817	1.74835	Control	EndoCap-a
AGGGTGACAGGAACGT_10X_Control_20181212	-15.0381	-0.670208	Control	EndoCap-a
GTACGTATCGGCGCTA_10X_Control_20181212	-13.8718	1.52046	Control	EndoCap-a
GGGCACTAGAGTGAGA_10X_Hypoxia_20181213	-15.45	-0.366633	Hypoxia	EndoCap-a
GGCGTGTTCAGAGCTT_10X_Control_20180727	-16.1332	0.517661	Control	EndoCap-a
GTTTCTAGTAAGAGGA_10X_Hypoxia_20181213	-14.1854	-0.916476	Hypoxia	EndoCap-a
TACCTTACAAGCGAGT_10X_Control_20180727	-14.9803	1.23248	Control	EndoCap-a
CCGTTCAGTCCAAGTT_10X_Hypoxia_20181212	-14.4346	-1.14629	Hypoxia	EndoCap-a
ATTGGTGTCGGAGCAA_10X_Control_20181213	-16.3824	1.50951	Control	EndoCap-a
CACACAAGTCCGAATT_10X_Control_20180727	-16.3345	1.09421	Control	EndoCap-a
GGCTCGAAGTGAACGC_10X_Hypoxia_20181213	-15.4464	1.07275	Hypoxia	EndoCap-a
CTAGAGTCAGGATCGA_10X_Control_20181213	-13.7602	-0.00227544	Control	EndoCap-a
TCTGAGACATTGGGCC_10X_Hypoxia_20181212	-15.4992	0.526132	Hypoxia	EndoCap-a
CACTCCATCACGCATA_10X_Control_20181212	-15.2217	1.208	Control	EndoCap-a
ATCCGAACATACTACG_10X_Hypoxia_20181213	-15.2444	0.887846	Hypoxia	EndoCap-a
AAGACCTCAAAGCGGT_10X_Control_20181213	-16.0048	1.75515	Control	EndoCap-a
TGCACCTGTCAATGTC_10X_Control_20180727	-16.2294	-0.0244265	Control	EndoCap-a
AACGTTGAGCAACGGT_10X_Hypoxia_20181213	-16.0737	0.740839	Hypoxia	EndoCap-a
CCACCTAGTAGCACGA_10X_Hypoxia_20180727	-14.3134	0.106772	Hypoxia	EndoCap-a
TTCGGTCCACTCTGTC_10X_Hypoxia_20180727	-13.8617	0.547112	Hypoxia	EndoCap-a
CCAGCGACACAGCCCA_10X_Control_20181212	-14.7935	1.43352	Control	EndoCap-a
TTGGCAAAGAAACCAT_10X_Hypoxia_20180727	-13.797	-0.564001	Hypoxia	EndoCap-a
CAGCTGGCAACCGCCA_10X_Hypoxia_20181212	-15.4829	-0.0586639	Hypoxia	EndoCap-a
TGAAAGATCTTGCAAG_10X_Hypoxia_20181212	-15.0889	1.21508	Hypoxia	EndoCap-a
GTGGGTCTCCGCAAGC_10X_Control_20181212	-14.5422	0.853906	Control	EndoCap-a
CACCAGGGTCTAGTCA_10X_Hypoxia_20181213	-14.4038	-0.413046	Hypoxia	EndoCap-a
CCTCAGTCAGTATGCT_10X_Hypoxia_20180727	-16.0143	-0.0131663	Hypoxia	EndoCap-a
TGCCCTACATCCTTGC_10X_Hypoxia_20180727	-15.1907	1.00324	Hypoxia	EndoCap-a
AACTCAGCAATGGTCT_10X_Hypoxia_20180727	-14.5449	-0.350472	Hypoxia	EndoCap-a
ACTTGTTCAGCTGGCT_10X_Hypoxia_20181213	-15.1499	-0.939365	Hypoxia	EndoCap-a
CGGACTGCATTTGCTT_10X_Hypoxia_20181213	-15.5244	0.113811	Hypoxia	EndoCap-a
TGGTTCCAGAAACCTA_10X_Hypoxia_20181213	-14.3793	0.817389	Hypoxia	EndoCap-a
AATCCAGTCAGCTCGG_10X_Hypoxia_20180727	-13.7061	0.461297	Hypoxia	EndoCap-a
CTTCTCTGTCTACCTC_10X_Hypoxia_20181213	-13.4254	-0.747545	Hypoxia	EndoCap-a
GGGAATGGTCGCATCG_10X_Control_20180727	-15.3687	-0.250372	Control	EndoCap-a
CTAAGACTCTTGTACT_10X_Control_20180727	-14.4955	1.60606	Control	EndoCap-a
GCTGCGATCCACTGGG_10X_Hypoxia_20180727	-15.1685	0.0196269	Hypoxia	EndoCap-a
TGCTGCTGTTGCGCAC_10X_Hypoxia_20180727	-15.3992	-0.956618	Hypoxia	EndoCap-a
TGAGGGATCGTACCGG_10X_Hypoxia_20180727	-13.3181	0.474661	Hypoxia	EndoCap-a
TACCTTATCGAGGTAG_10X_Control_20180727	-15.9246	1.19141	Control	EndoCap-a
GACGCGTCACTTCGAA_10X_Hypoxia_20181212	-13.5224	-0.521443	Hypoxia	EndoCap-a
AGCCTAACAGCCAGAA_10X_Hypoxia_20180727	-14.2843	-0.0455265	Hypoxia	EndoCap-a
CAGCCGACACACCGCA_10X_Control_20180727	-14.3378	1.82791	Control	EndoCap-a
AGTGTCAGTAATCGTC_10X_Control_20181212	-14.4387	0.914446	Control	EndoCap-a
TACTCGCCAATAGAGT_10X_Control_20180727	-16.2844	1.23261	Control	EndoCap-a
GATGCTAAGGGTTTCT_10X_Hypoxia_20180727	-14.8248	0.173536	Hypoxia	EndoCap-a
GCATGTACAATGACCT_10X_Hypoxia_20181212	-15.7839	-0.221099	Hypoxia	EndoCap-a
CACTCCAGTTCTGGTA_10X_Control_20181212	-15.2315	1.4017	Control	EndoCap-a
TGGTTCCCAATCTACG_10X_Hypoxia_20181213	-15.6036	-0.708973	Hypoxia	EndoCap-a
AACTCAGGTTGGTTTG_10X_Hypoxia_20181213	-14.7864	-0.506917	Hypoxia	EndoCap-a
ATTCTACTCTGGGCCA_10X_Hypoxia_20181213	-14.7195	0.883159	Hypoxia	EndoCap-a
GACGGCTGTTTGGGCC_10X_Control_20181212	-16.2504	1.30346	Control	EndoCap-a
GCTGGGTAGGATTCGG_10X_Hypoxia_20180727	-13.6689	-0.0854898	Hypoxia	EndoCap-a
GACGGCTTCATCACCC_10X_Hypoxia_20181213	-13.0554	-0.144099	Hypoxia	EndoCap-a
GCCTCTAAGGGAAACA_10X_Hypoxia_20181213	-14.3009	0.0605652	Hypoxia	EndoCap-a
TGAGGGAGTTTGTTGG_10X_Control_20180727	-15.1973	0.11373	Control	EndoCap-a
GTACGTATCCTAGAAC_10X_Hypoxia_20181213	-14.7283	-1.12058	Hypoxia	EndoCap-a
AGTCTTTCACGGCTAC_10X_Control_20180727	-14.8716	1.82171	Control	EndoCap-a
CATGACATCATCATTC_10X_Control_20181212	-15.1468	1.65663	Control	EndoCap-a
CATTCGCTCAGGCGAA_10X_Control_20180727	-15.2049	1.49111	Control	EndoCap-a
GTACTTTAGCTGTTCA_10X_Control_20181212	-14.0594	0.82138	Control	EndoCap-a
CGTGAGCCATAACCTG_10X_Hypoxia_20180727	-15.0852	1.38003	Hypoxia	EndoCap-a
TCACGAACAGTGAGTG_10X_Hypoxia_20181212	-14.3607	-0.368505	Hypoxia	EndoCap-a
CGACTTCCAATGGATA_10X_Hypoxia_20181213	-15.842	1.62174	Hypoxia	EndoCap-a
TGGCCAGAGGCTCATT_10X_Hypoxia_20181213	-15.3665	0.16471	Hypoxia	EndoCap-a
ATTACTCTCGTTGCCT_10X_Hypoxia_20180727	-14.7826	0.61388	Hypoxia	EndoCap-a
ATCCACCTCCGCGGTA_10X_Control_20181213	-14.8716	1.2317	Control	EndoCap-a
TAGTTGGCAAGCGATG_10X_Hypoxia_20180727	-14.6446	0.992988	Hypoxia	EndoCap-a
CAGCTAATCGCCATAA_10X_Hypoxia_20180727	-13.978	0.10743	Hypoxia	EndoCap-a
TGCACCTTCATTATCC_10X_Hypoxia_20180727	-14.5247	0.41335	Hypoxia	EndoCap-a
AGGTCCGGTCGGCTCA_10X_Hypoxia_20181213	-16.0824	1.17663	Hypoxia	EndoCap-a
TTGCCGTAGCCAGAAC_10X_Control_20181212	-15.3164	-0.0360486	Control	EndoCap-a
TACTTGTAGCGATCCC_10X_Control_20181213	-16.1426	0.918661	Control	EndoCap-a
ACGGCCACAAGTCTGT_10X_Hypoxia_20181212	-15.3501	-0.612175	Hypoxia	EndoCap-a
CCTTCCCCATCGATTG_10X_Hypoxia_20181213	-15.5582	0.883265	Hypoxia	EndoCap-a
AATCCAGTCGGTCCGA_10X_Control_20180727	-15.4298	1.03665	Control	EndoCap-a
CATCAGATCTTGGGTA_10X_Hypoxia_20181212	-15.2051	1.16384	Hypoxia	EndoCap-a
AGCTTGAAGACAAGCC_10X_Control_20181212	-16.0101	1.10033	Control	EndoCap-a
ACGCAGCAGGGATCTG_10X_Hypoxia_20180727	-14.6491	1.9836	Hypoxia	EndoCap-a
GAAATGACAAGACACG_10X_Control_20181212	-15.1941	0.923478	Control	EndoCap-a
AGAATAGAGGAGCGAG_10X_Hypoxia_20181212	-13.6395	0.623703	Hypoxia	EndoCap-a
ACGGGCTAGTACACCT_10X_Hypoxia_20180727	-15.8733	-0.465377	Hypoxia	EndoCap-a
GTAACGTCATGACGGA_10X_Control_20181212	-15.1473	0.277747	Control	EndoCap-a
ATGTGTGAGGCTCAGA_10X_Hypoxia_20180727	-13.745	0.836781	Hypoxia	EndoCap-a
AGTGAGGCAGCCTATA_10X_Hypoxia_20180727	-13.7286	0.0505654	Hypoxia	EndoCap-a
CACAAACTCGCTTGTC_10X_Hypoxia_20180727	-15.1974	-0.722075	Hypoxia	EndoCap-a
AGTAGTCAGACACGAC_10X_Hypoxia_20181213	-14.9192	-0.409271	Hypoxia	EndoCap-a
GCATACACATTGCGGC_10X_Control_20180727	-15.3057	1.4368	Control	EndoCap-a
CTACCCACACGTTGGC_10X_Control_20181213	-15.569	1.74729	Control	EndoCap-a
CGATTGATCAGCGACC_10X_Control_20180727	-16.5777	1.03558	Control	EndoCap-a
ACTTTCACACCAGGCT_10X_Hypoxia_20180727	-15.5606	1.68208	Hypoxia	EndoCap-a
AACTTTCGTCACCCAG_10X_Control_20180727	-15.0745	1.83025	Control	EndoCap-a
GCTGCAGTCACTATTC_10X_Hypoxia_20180727	-14.3473	-0.474647	Hypoxia	EndoCap-a
CACATAGGTACATGTC_10X_Hypoxia_20181212	-13.9167	-0.409933	Hypoxia	EndoCap-a
TATCAGGAGCACAGGT_10X_Control_20181212	-14.9858	1.84825	Control	EndoCap-a
AGGTCATCAGTCACTA_10X_Hypoxia_20181213	-14.8881	-0.0903719	Hypoxia	EndoCap-a
CGGCTAGCAGCCTTTC_10X_Hypoxia_20180727	-13.6003	0.0829762	Hypoxia	EndoCap-a
TCGTACCTCCGTCAAA_10X_Control_20181212	-16.0744	0.858637	Control	EndoCap-a
CTCGAGGCATCGGGTC_10X_Control_20180727	-16.0673	0.597721	Control	EndoCap-a
ACTTACTAGGTGATTA_10X_Control_20181212	-15.8935	1.4032	Control	EndoCap-a
CAACCTCTCCGGCACA_10X_Control_20181212	-15.3679	1.29036	Control	EndoCap-a
CAACCTCTCCGCATAA_10X_Hypoxia_20180727	-13.8038	-1.00024	Hypoxia	EndoCap-a
TTCGGTCTCCCTTGTG_10X_Control_20181212	-15.5547	-0.0771384	Control	EndoCap-a
GGCCGATGTACCCAAT_10X_Hypoxia_20180727	-16.4803	0.474682	Hypoxia	EndoCap-a
GCGAGAACAGCTGCTG_10X_Control_20181212	-15.2057	1.84799	Control	EndoCap-a
CCGTGGATCTCTTATG_10X_Hypoxia_20181212	-15.8886	0.36611	Hypoxia	EndoCap-a
CTCGGGACAGTAGAGC_10X_Control_20181212	-15.2625	0.641072	Control	EndoCap-a
GGACATTAGTCTCCTC_10X_Hypoxia_20180727	-14.2369	-0.689672	Hypoxia	EndoCap-a
GGTGCGTTCCGCATAA_10X_Control_20181212	-15.6365	-0.329749	Control	EndoCap-a
TGAGGGAGTGATAAAC_10X_Control_20181212	-15.6344	1.74163	Control	EndoCap-a
GCTCCTAAGGACTGGT_10X_Control_20180727	-15.7669	0.525643	Control	EndoCap-a
TGCCCTAGTACATCCA_10X_Hypoxia_20180727	-14.9438	0.213028	Hypoxia	EndoCap-a
ACGGCCAGTTCGTTGA_10X_Hypoxia_20180727	-14.9389	0.28448	Hypoxia	EndoCap-a
GACTGCGGTTGGAGGT_10X_Hypoxia_20180727	-14.8609	1.3808	Hypoxia	EndoCap-a
ACTGAGTCATCAGTCA_10X_Control_20181213	-16.154	1.67344	Control	EndoCap-a
CAAGAAACATCTGGTA_10X_Control_20180727	-14.5288	1.68633	Control	EndoCap-a
TAGTGGTCAAGGCTCC_10X_Hypoxia_20180727	-15.4857	0.388164	Hypoxia	EndoCap-a
TGCGCAGCATTGGTAC_10X_Hypoxia_20181213	-13.741	0.0429073	Hypoxia	EndoCap-a
TGACTTTGTCAAAGAT_10X_Hypoxia_20180727	-15.4689	-0.2159	Hypoxia	EndoCap-a
CGGCTAGCATCACGAT_10X_Control_20181212	-14.6683	-0.0992447	Control	EndoCap-a
CGCCAAGCACGCATCG_10X_Control_20181212	-14.3233	0.804812	Control	EndoCap-a
TCGTACCTCCAAGCCG_10X_Hypoxia_20181212	-14.0665	-0.290319	Hypoxia	EndoCap-a
AGTTGGTAGGACACCA_10X_Control_20180727	-14.1971	0.996293	Control	EndoCap-a
CACTCCACAGTCGATT_10X_Control_20180727	-15.3049	1.01504	Control	EndoCap-a
TCAGATGGTGGCAAAC_10X_Control_20180727	-14.7777	1.73585	Control	EndoCap-a
CGAGAAGTCTTAGCCC_10X_Hypoxia_20181212	-14.4667	-0.0975187	Hypoxia	EndoCap-a
CTGCGGACATAGTAAG_10X_Control_20181212	-14.9677	1.1989	Control	EndoCap-a
ATGGGAGGTCCGAATT_10X_Control_20180727	-16.1157	0.222953	Control	EndoCap-a
GCCTCTAAGACTAAGT_10X_Control_20181212	-14.8338	1.39693	Control	EndoCap-a
AAGGCAGAGGAATCGC_10X_Hypoxia_20181213	-13.4103	0.433235	Hypoxia	EndoCap-a
TGCTGCTCACGCGAAA_10X_Control_20180727	-14.2522	0.544625	Control	EndoCap-a
CGCTGGAAGCCCAACC_10X_Control_20180727	-13.9539	1.68197	Control	EndoCap-a
ACACCAACAAGCTGAG_10X_Hypoxia_20180727	-14.3902	1.61593	Hypoxia	EndoCap-a
TTAGGACAGGACCACA_10X_Control_20181212	-14.9568	1.55506	Control	EndoCap-a
CCGTTCATCTGGAGCC_10X_Control_20181212	-13.038	0.403102	Control	EndoCap-a
CAGCTGGTCCTGTACC_10X_Hypoxia_20181212	-14.432	1.58685	Hypoxia	EndoCap-a
GGATGTTGTGTTCGAT_10X_Hypoxia_20180727	-15.0381	0.514211	Hypoxia	EndoCap-a
TTATGCTTCTAACTCT_10X_Hypoxia_20180727	-15.6681	0.271638	Hypoxia	EndoCap-a
GTGCATACAGTTAACC_10X_Hypoxia_20180727	-15.613	-0.583553	Hypoxia	EndoCap-a
CGTAGGCCATCCCACT_10X_Hypoxia_20180727	-15.8144	-0.198522	Hypoxia	EndoCap-a
CACATTTGTGGACGAT_10X_Control_20181213	-15.8795	1.29964	Control	EndoCap-a
TCAGGTACACAACTGT_10X_Hypoxia_20181213	-16.0928	0.860546	Hypoxia	EndoCap-a
TATCTCATCATGTCTT_10X_Control_20181213	-14.7103	0.92086	Control	EndoCap-a
CGAATGTTCGGGAGTA_10X_Control_20181212	-14.2235	-0.487608	Control	EndoCap-a
ACTTGTTGTCCCGACA_10X_Control_20181213	-16.5458	0.738166	Control	EndoCap-a
AACTCTTGTGCACTTA_10X_Hypoxia_20181212	-14.0712	-0.315291	Hypoxia	EndoCap-a
CTGTTTAAGGCACATG_10X_Control_20180727	-15.7767	0.754287	Control	EndoCap-a
CTGCGGATCGCCGTGA_10X_Hypoxia_20181212	-13.0909	0.616697	Hypoxia	EndoCap-a
GCATGCGAGACTAAGT_10X_Control_20181212	-14.6759	1.80577	Control	EndoCap-a
ATTCTACGTAGGCTGA_10X_Hypoxia_20180727	-15.982	-0.43899	Hypoxia	EndoCap-a
GGAATAATCCATGAAC_10X_Hypoxia_20181213	-15.5881	0.0320312	Hypoxia	EndoCap-a
ACACCCTTCTGGGCCA_10X_Control_20181212	-14.4256	0.488758	Control	EndoCap-a
TTAACTCCAATGACCT_10X_Control_20180727	-16.1137	1.3909	Control	EndoCap-a
CAGCCGATCAAGGCTT_10X_Hypoxia_20180727	-15.2964	-0.0766324	Hypoxia	EndoCap-a
GTGTGCGAGGATCGCA_10X_Control_20180727	-15.6582	1.64617	Control	EndoCap-a
GCTCTGTGTATTAGCC_10X_Hypoxia_20181213	-15.7038	0.435885	Hypoxia	EndoCap-a
CTCTGGTCAGATTGCT_10X_Control_20181212	-15.2174	0.364125	Control	EndoCap-a
CTACACCTCACCACCT_10X_Hypoxia_20180727	-14.3944	1.21257	Hypoxia	EndoCap-a
ATCTACTCACGGATAG_10X_Hypoxia_20180727	-14.2646	0.686129	Hypoxia	EndoCap-a
TCAGCTCCATGCAATC_10X_Control_20181212	-14.4658	1.0529	Control	EndoCap-a
GAACGGATCGTCCGTT_10X_Hypoxia_20181213	-13.8812	-0.807937	Hypoxia	EndoCap-a
AAAGTAGGTACTTGAC_10X_Control_20181212	-16.2359	1.43858	Control	EndoCap-a
TTATGCTGTCAATGTC_10X_Control_20181212	-14.3011	0.81857	Control	EndoCap-a
CTACGTCTCACAACGT_10X_Hypoxia_20180727	-13.4621	0.485796	Hypoxia	EndoCap-a
AAGGCAGAGTACTTGC_10X_Hypoxia_20181213	-14.7706	-0.0176925	Hypoxia	EndoCap-a
TCAGCAAAGAAGCCCA_10X_Hypoxia_20181213	-14.6222	-0.694654	Hypoxia	EndoCap-a
GTGGGTCGTCGATTGT_10X_Control_20180727	-15.6407	0.622035	Control	EndoCap-a
CAGCTAACAATGGATA_10X_Control_20181212	-15.5939	1.14891	Control	EndoCap-a
TTAGGACTCGCTTAGA_10X_Control_20180727	-14.0546	1.23923	Control	EndoCap-a
AAGACCTCATACAGCT_10X_Hypoxia_20181212	-15.0326	0.564974	Hypoxia	EndoCap-a
ATAAGAGAGCGGCTTC_10X_Hypoxia_20180727	-15.247	1.17959	Hypoxia	EndoCap-a
CGTTGGGAGTAGCCGA_10X_Hypoxia_20180727	-14.7922	0.0785385	Hypoxia	EndoCap-a
GTACGTATCTGTTTGT_10X_Hypoxia_20181212	-15.3682	0.519679	Hypoxia	EndoCap-a
ATTGGACAGAAGCCCA_10X_Hypoxia_20181213	-16.0355	-0.331767	Hypoxia	EndoCap-a
CCTAAAGCAATAGCAA_10X_Hypoxia_20180727	-15.7934	0.525117	Hypoxia	EndoCap-a
GTAGTCAAGACGCAAC_10X_Control_20181212	-14.0491	1.46712	Control	EndoCap-a
ACGTCAAAGCTCCTCT_10X_Hypoxia_20181212	-15.5609	0.826908	Hypoxia	EndoCap-a
CGTTGGGGTCGTCTTC_10X_Control_20181213	-15.2198	1.04958	Control	EndoCap-a
GGTGAAGAGAATGTGT_10X_Hypoxia_20181213	-15.9732	-0.214577	Hypoxia	EndoCap-a
ACGAGGATCTTAGCCC_10X_Hypoxia_20180727	-14.9274	0.0293411	Hypoxia	EndoCap-a
AGTCTTTAGATCACGG_10X_Control_20181212	-14.7438	0.467701	Control	EndoCap-a
GTTTCTACATTGAGCT_10X_Control_20181212	-15.9762	-0.487022	Control	EndoCap-a
AGGCCGTTCTTGTTTG_10X_Control_20181212	-16.1883	0.978283	Control	EndoCap-a
CTTTGCGAGTGCGATG_10X_Control_20180727	-15.6193	1.7142	Control	EndoCap-a
AACACGTAGTTGTAGA_10X_Hypoxia_20181213	-15.112	0.855654	Hypoxia	EndoCap-a
ATTCTACAGTTAAGTG_10X_Control_20180727	-15.0762	0.488303	Control	EndoCap-a
GTCGGGTAGGAACTGC_10X_Hypoxia_20181213	-15.654	-0.0963197	Hypoxia	EndoCap-a
ATGTGTGGTCACACGC_10X_Hypoxia_20181213	-15.5935	-0.711002	Hypoxia	EndoCap-a
GTACGTAAGCGGCTTC_10X_Control_20180727	-13.8814	0.497691	Control	EndoCap-a
AACTTTCGTAGCTAAA_10X_Control_20181213	-15.0972	1.61468	Control	EndoCap-a
TACTCATGTAGGGTAC_10X_Hypoxia_20181213	-15.0226	1.42681	Hypoxia	EndoCap-a
TGCCCATTCTCCAGGG_10X_Control_20181212	-13.9681	1.16722	Control	EndoCap-a
AAGCCGCGTGGCAAAC_10X_Hypoxia_20181213	-15.4893	0.125641	Hypoxia	EndoCap-a
ATCACGACACAGAGGT_10X_Control_20180727	-14.2422	-0.910261	Control	EndoCap-a
CACATTTAGGGATGGG_10X_Hypoxia_20180727	-13.5591	-0.178222	Hypoxia	EndoCap-a
GCGACCACAGCTTAAC_10X_Control_20181212	-16.177	0.371394	Control	EndoCap-a
TGAAAGACATCTGGTA_10X_Hypoxia_20181213	-14.6683	0.154298	Hypoxia	EndoCap-a
TGGCTGGAGATCACGG_10X_Control_20181212	-15.2682	0.527333	Control	EndoCap-a
TGAGGGACAGTATAAG_10X_Control_20180727	-15.1845	1.94821	Control	EndoCap-a
CACACTCGTCTTGATG_10X_Hypoxia_20181212	-14.3925	-0.05785	Hypoxia	EndoCap-a
AAATGCCAGATATGCA_10X_Hypoxia_20181213	-14.1029	-0.522845	Hypoxia	EndoCap-a
GATCGATCATTTCACT_10X_Hypoxia_20180727	-13.8546	1.00722	Hypoxia	EndoCap-a
CCACCTAAGTATGACA_10X_Control_20180727	-15.4122	0.716349	Control	EndoCap-a
AGTGAGGAGCTCCTTC_10X_Control_20181213	-15.4399	0.956101	Control	EndoCap-a
GCTCCTAGTAGCACGA_10X_Control_20180727	-14.0425	0.918227	Control	EndoCap-a
CTGCGGACAGCCTTTC_10X_Control_20180727	-15.3162	1.32743	Control	EndoCap-a
CCACCTAAGGTGCAAC_10X_Hypoxia_20181213	-14.0386	0.36103	Hypoxia	EndoCap-a
TACGGGCCATGGTTGT_10X_Hypoxia_20180727	-14.8788	1.05133	Hypoxia	EndoCap-a
GATCGCGGTCAAAGAT_10X_Hypoxia_20181212	-15.2248	1.13922	Hypoxia	EndoCap-a
TACTCATTCCGTAGGC_10X_Control_20181213	-13.0707	1.87777	Control	EndoCap-a
GGAGCAACAGGGATTG_10X_Hypoxia_20181212	-14.8578	1.03152	Hypoxia	EndoCap-a
CTCACACAGATGCCAG_10X_Hypoxia_20180727	-15.7409	1.51117	Hypoxia	EndoCap-a
AACTCCCCATATGCTG_10X_Control_20181212	-16.1469	0.892189	Control	EndoCap-a
CTCATTATCGCTTGTC_10X_Hypoxia_20180727	-15.0648	-0.0321876	Hypoxia	EndoCap-a
CTGCTGTCAGGAATCG_10X_Control_20181212	-13.614	0.275375	Control	EndoCap-a
TGGTTCCGTCTAGCGC_10X_Control_20181213	-15.5946	1.38691	Control	EndoCap-a
CCATTCGTCTTGGGTA_10X_Control_20181212	-13.6392	-1.48571	Control	EndoCap-a
GCTCCTAAGAGTACAT_10X_Control_20181212	-14.9228	0.562916	Control	EndoCap-a
TTCGAAGGTATAGGGC_10X_Control_20180727	-14.6777	2.03793	Control	EndoCap-a
CAGCGACGTCGAATCT_10X_Hypoxia_20180727	-14.0633	-0.350948	Hypoxia	EndoCap-a
TGGGCGTGTCTTTCAT_10X_Control_20180727	-15.3258	0.760219	Control	EndoCap-a
TAAGAGACAAAGCAAT_10X_Control_20181212	-15.1184	1.86372	Control	EndoCap-a
TTCTTAGGTTACAGAA_10X_Control_20181213	-15.5006	0.310053	Control	EndoCap-a
CGCGTTTTCAGGTTCA_10X_Control_20181212	-16.0923	0.0792584	Control	EndoCap-a
AAAGTAGCAGGTGCCT_10X_Control_20181212	-15.1426	1.6713	Control	EndoCap-a
GCATGCGCATTAGGCT_10X_Hypoxia_20180727	-13.7257	-0.538805	Hypoxia	EndoCap-a
CCTACCAAGAAAGTGG_10X_Hypoxia_20181212	-15.7536	0.320281	Hypoxia	EndoCap-a
CCTATTAGTTCGGGCT_10X_Control_20181212	-15.9927	0.876664	Control	EndoCap-a
CGTTAGACATATACCG_10X_Control_20180727	-15.2768	0.956481	Control	EndoCap-a
ACATACGCATCTCGCT_10X_Hypoxia_20181213	-14.8577	-0.133889	Hypoxia	EndoCap-a
GTGAAGGCACGAGAGT_10X_Hypoxia_20180727	-15.1349	-0.145083	Hypoxia	EndoCap-a
ACGAGCCTCGTTACGA_10X_Hypoxia_20181213	-14.0265	0.837655	Hypoxia	EndoCap-a
TCTTTCCTCGCAAGCC_10X_Hypoxia_20181212	-13.9567	-0.737388	Hypoxia	EndoCap-a
AGCGGTCGTTTGCATG_10X_Control_20181212	-15.3457	2.13093	Control	EndoCap-a
TGCGGGTAGTGAAGTT_10X_Control_20180727	-13.4865	0.394212	Control	EndoCap-a
ACCCACTCACGACGAA_10X_Control_20180727	-15.6024	1.45664	Control	EndoCap-a
GTCTTCGGTCACCCAG_10X_Hypoxia_20181213	-13.4964	0.0608989	Hypoxia	EndoCap-a
CATCAGAAGTCAAGGC_10X_Hypoxia_20181212	-15.0776	-0.106199	Hypoxia	EndoCap-a
CGTAGCGTCTTCGAGA_10X_Hypoxia_20181213	-13.3352	-0.0503168	Hypoxia	EndoCap-a
CCTTCCCTCGACGGAA_10X_Hypoxia_20180727	-15.1623	-0.649987	Hypoxia	EndoCap-a
CCGTTCAGTCGGCATC_10X_Control_20181213	-14.8939	-0.49721	Control	EndoCap-a
TGAGCATCAGACGTAG_10X_Control_20181212	-16.1427	1.31044	Control	EndoCap-a
CAGCGACAGGGAAACA_10X_Hypoxia_20181213	-14.837	-0.447406	Hypoxia	EndoCap-a
GCGGGTTTCGCATGGC_10X_Hypoxia_20181213	-14.039	-0.347906	Hypoxia	EndoCap-a
CAAGGCCGTAACGCGA_10X_Control_20181212	-14.1934	0.694393	Control	EndoCap-a
ATCCGAAGTGGCCCTA_10X_Hypoxia_20181212	-15.9477	0.632982	Hypoxia	EndoCap-a
CACACTCAGCGCCTTG_10X_Hypoxia_20181212	-15.4644	-0.658215	Hypoxia	EndoCap-a
ACGGCCAAGAGGTTGC_10X_Control_20181212	-15.8434	-0.221583	Control	EndoCap-a
GATCGCGCATTGGCGC_10X_Hypoxia_20180727	-13.6038	-0.466737	Hypoxia	EndoCap-a
TGAGCCGTCTAACTTC_10X_Hypoxia_20181212	-14.5739	0.834952	Hypoxia	EndoCap-a
CTCGGAGCACGCGAAA_10X_Hypoxia_20181213	-15.528	1.39896	Hypoxia	EndoCap-a
CATCCACTCATGTGGT_10X_Control_20181212	-15.6776	-0.462064	Control	EndoCap-a
CATCCACCAACGCACC_10X_Hypoxia_20181213	-15.7771	0.0234225	Hypoxia	EndoCap-a
CCTCTGACATGACGGA_10X_Control_20181212	-14.8756	0.984645	Control	EndoCap-a
CCATGTCTCAGCTGGC_10X_Hypoxia_20181212	-14.0085	0.693401	Hypoxia	EndoCap-a
TGACAACCAGCTATTG_10X_Hypoxia_20181212	-15.7007	0.235321	Hypoxia	EndoCap-a
CAACCAACATTACCTT_10X_Control_20181213	-15.8631	0.265342	Control	EndoCap-a
ATGTGTGAGTCAAGCG_10X_Hypoxia_20180727	-15.6347	-0.744756	Hypoxia	EndoCap-a
AGACGTTCATCGTCGG_10X_Hypoxia_20181212	-13.8271	0.791334	Hypoxia	EndoCap-a
TTAGGACAGAAGGTTT_10X_Hypoxia_20180727	-16.057	1.25047	Hypoxia	EndoCap-a
GGGACCTCAATAGCGG_10X_Hypoxia_20181212	-15.0325	0.79239	Hypoxia	EndoCap-a
CTTTGCGAGTACGTAA_10X_Hypoxia_20180727	-15.0959	0.180421	Hypoxia	EndoCap-a
CGATGGCAGTGCGTGA_10X_Control_20181212	-14.8496	1.02159	Control	EndoCap-a
GTAGGCCGTAAATGAC_10X_Hypoxia_20181212	-14.037	0.72886	Hypoxia	EndoCap-a
GGGTTGCCAGCCTTTC_10X_Hypoxia_20181212	-15.3986	-0.218562	Hypoxia	EndoCap-a
TGGTTAGGTGTCGCTG_10X_Control_20181212	-15.818	1.72722	Control	EndoCap-a
TGGCGCAGTCAGAATA_10X_Hypoxia_20181213	-15.3484	-0.74214	Hypoxia	EndoCap-a
GCGAGAATCAGCTGGC_10X_Hypoxia_20180727	-13.5665	-0.256798	Hypoxia	EndoCap-a
AGATCTGAGGCTCATT_10X_Control_20181213	-15.8713	0.988604	Control	EndoCap-a
TTCGAAGAGAATGTGT_10X_Hypoxia_20180727	-14.3807	0.418405	Hypoxia	EndoCap-a
ACATCAGTCCTAGAAC_10X_Control_20180727	-13.7114	0.0972498	Control	EndoCap-a
ACCCACTTCAACACAC_10X_Control_20180727	-16.2916	0.790998	Control	EndoCap-a
CTAGTGAAGCGTCTAT_10X_Hypoxia_20180727	-13.9651	0.529417	Hypoxia	EndoCap-a
GAACATCCAATGCCAT_10X_Hypoxia_20181212	-13.3591	1.96872	Hypoxia	EndoCap-a
CAGATCAAGTGTTGAA_10X_Control_20181212	-15.6769	1.80104	Control	EndoCap-a
TATGCCCTCTCGGACG_10X_Control_20181212	-14.0678	1.13553	Control	EndoCap-a
ACGGGCTGTATATCCG_10X_Control_20181212	-13.6398	1.24354	Control	EndoCap-a
CGCGGTATCTGTACGA_10X_Hypoxia_20181213	-15.5014	0.8435	Hypoxia	EndoCap-a
CGATTGAGTAGCCTAT_10X_Control_20181213	-15.7473	1.27188	Control	EndoCap-a
CCACCTAGTGTGAATA_10X_Hypoxia_20180727	-14.2591	-0.678358	Hypoxia	EndoCap-a
AGGGATGCATGTCCTC_10X_Control_20181212	-14.1277	1.18197	Control	EndoCap-a
TCAGGATGTCGTCTTC_10X_Control_20180727	-14.7569	0.113192	Control	EndoCap-a
CTGGTCTTCGGCCGAT_10X_Control_20181212	-15.9279	1.90071	Control	EndoCap-a
CAGAGAGAGTATCGAA_10X_Hypoxia_20180727	-15.9369	0.725164	Hypoxia	EndoCap-a
TGCTGCTGTTTGGGCC_10X_Hypoxia_20180727	-15.052	-0.202992	Hypoxia	EndoCap-a
TGCTGCTTCTCTGAGA_10X_Control_20181212	-14.5759	1.67826	Control	EndoCap-a
TGCGGGTCACATGTGT_10X_Hypoxia_20180727	-15.3579	-0.186277	Hypoxia	EndoCap-a
GATGAGGAGGGATGGG_10X_Hypoxia_20181212	-14.2933	1.37674	Hypoxia	EndoCap-a
CAGCCGACATGCCTTC_10X_Control_20181213	-14.2677	1.47465	Control	EndoCap-a
TTTATGCTCTTCATGT_10X_Control_20181212	-15.6369	1.55341	Control	EndoCap-a
GGCAATTTCATGTAGC_10X_Hypoxia_20180727	-14.7909	-0.412336	Hypoxia	EndoCap-a
CGGAGCTTCCGAACGC_10X_Hypoxia_20180727	-13.8858	0.507495	Hypoxia	EndoCap-a
CGAGCACCAGTAAGCG_10X_Hypoxia_20180727	-14.5647	0.841898	Hypoxia	EndoCap-a
GTGTTAGTCAAAGTAG_10X_Hypoxia_20180727	-15.0065	0.123191	Hypoxia	EndoCap-a
CCATTCGGTGCAACGA_10X_Control_20181212	-15.1703	0.053298	Control	EndoCap-a
GCGCCAAAGTCCATAC_10X_Hypoxia_20181212	-13.8128	0.299163	Hypoxia	EndoCap-a
AGGGTGAAGATCCCAT_10X_Control_20180727	-14.0839	1.09472	Control	EndoCap-a
CATTATCGTTGAGTTC_10X_Hypoxia_20181213	-14.2578	-0.312489	Hypoxia	EndoCap-a
GTCTTCGCAATAGCAA_10X_Hypoxia_20181213	-14.8705	-0.580533	Hypoxia	EndoCap-a
AGCGTATAGGCTCTTA_10X_Hypoxia_20181213	-15.2485	-0.819543	Hypoxia	EndoCap-a
CGATTGACATCCGTGG_10X_Control_20180727	-15.3717	1.28936	Control	EndoCap-a
AGGGATGTCGGCATCG_10X_Control_20181212	-15.6535	1.12636	Control	EndoCap-a
AGAGCGAAGAATGTTG_10X_Control_20180727	-15.7963	1.83527	Control	EndoCap-a
TCACAAGCAAGCCTAT_10X_Hypoxia_20180727	-16.136	0.186133	Hypoxia	EndoCap-a
ACATACGTCCTCCTAG_10X_Hypoxia_20181213	-15.3052	-0.586203	Hypoxia	EndoCap-a
GGTGCGTTCCTAAGTG_10X_Control_20180727	-16.1235	1.15505	Control	EndoCap-a
GTTCGGGAGCCACGTC_10X_Hypoxia_20181212	-15.0374	-0.52147	Hypoxia	EndoCap-a
CTCGAAACAGCTTAAC_10X_Control_20181212	-15.0268	1.95005	Control	EndoCap-a
CTAGTGACATGCTGGC_10X_Hypoxia_20181212	-15.523	0.127587	Hypoxia	EndoCap-a
CTCGGGAGTTCCCGAG_10X_Control_20180727	-14.8548	1.81656	Control	EndoCap-a
GTGCAGCGTCAGAAGC_10X_Hypoxia_20181213	-15.2801	-0.757395	Hypoxia	EndoCap-a
TCACGAAGTGATGTCT_10X_Hypoxia_20180727	-14.5359	-0.808964	Hypoxia	EndoCap-a
GGAATAACACACTGCG_10X_Hypoxia_20181213	-13.6949	-0.257218	Hypoxia	EndoCap-a
TGACTAGGTGCCTGGT_10X_Hypoxia_20181212	-14.9057	1.28937	Hypoxia	EndoCap-a
TGGCCAGGTTATCCGA_10X_Control_20180727	-15.8926	1.10603	Control	EndoCap-a
ACACCCTCACTATCTT_10X_Hypoxia_20180727	-15.2006	0.348469	Hypoxia	EndoCap-a
GATGAGGCAATCGGTT_10X_Control_20181213	-15.2575	2.03568	Control	EndoCap-a
TTAGTTCTCTTCGAGA_10X_Control_20181213	-15.4955	1.68609	Control	EndoCap-a
GTCCTCAGTTGATTGC_10X_Control_20181212	-16.0389	0.765309	Control	EndoCap-a
ACGAGGACAGCATACT_10X_Control_20180727	-16.1141	1.16514	Control	EndoCap-a
GTTTCTAGTAGGGTAC_10X_Hypoxia_20180727	-14.5186	0.0701415	Hypoxia	EndoCap-a
CATATTCCAGCTATTG_10X_Hypoxia_20180727	-13.6028	0.63027	Hypoxia	EndoCap-a
ATAACGCTCCAAACAC_10X_Hypoxia_20180727	-14.978	0.23021	Hypoxia	EndoCap-a
CACCACTCAGCGATCC_10X_Control_20180727	-15.2725	2.09655	Control	EndoCap-a
CGTCCATTCATGCAAC_10X_Control_20181212	-15.5408	1.6434	Control	EndoCap-a
GACGTTACAGTGGGAT_10X_Hypoxia_20180727	-15.3442	0.259662	Hypoxia	EndoCap-a
GTAACGTCACCTCGGA_10X_Hypoxia_20181213	-13.3741	0.16785	Hypoxia	EndoCap-a
GACACGCGTCATCGGC_10X_Hypoxia_20180727	-14.3863	0.990685	Hypoxia	EndoCap-a
AACCGCGCATGCCCGA_10X_Hypoxia_20181213	-16.2192	0.0476208	Hypoxia	EndoCap-a
ACTGCTCTCCCTCAGT_10X_Control_20180727	-16.0129	0.0248277	Control	EndoCap-a
GTAACTGTCGTCTGAA_10X_Control_20181212	-16.2719	-0.149133	Control	EndoCap-a
CGTGTAACAGGTTTCA_10X_Hypoxia_20181213	-13.6201	-0.3313	Hypoxia	EndoCap-a
CCTAAAGGTAGCGATG_10X_Hypoxia_20181212	-14.8856	0.676614	Hypoxia	EndoCap-a
CTAGAGTAGTACACCT_10X_Hypoxia_20180727	-14.0092	1.16758	Hypoxia	EndoCap-a
GTTACAGAGGCTAGAC_10X_Hypoxia_20181213	-15.3178	-0.139763	Hypoxia	EndoCap-a
ACGGAGAGTATAGTAG_10X_Control_20180727	-15.8078	-0.153804	Control	EndoCap-a
AGTGAGGAGGCATGGT_10X_Hypoxia_20181212	-13.8013	1.27255	Hypoxia	EndoCap-a
CACAGGCGTCCAGTGC_10X_Control_20181212	-16.072	0.746394	Control	EndoCap-a
CATCCACTCCAATGGT_10X_Hypoxia_20181213	-15.9725	1.28458	Hypoxia	EndoCap-a
CGTGAGCCACAGGCCT_10X_Control_20180727	-15.4789	2.00835	Control	EndoCap-a
TACTCGCCATTCGACA_10X_Hypoxia_20181212	-15.1641	-0.567321	Hypoxia	EndoCap-a
AGTAGTCAGCTAACTC_10X_Hypoxia_20180727	-15.3296	1.05671	Hypoxia	EndoCap-a
GAGGTGACATCACGTA_10X_Control_20180727	-14.1443	0.982037	Control	EndoCap-a
GGACGTCAGCTTTGGT_10X_Hypoxia_20181213	-15.0135	0.11459	Hypoxia	EndoCap-a
GTGCATACAGCGTTCG_10X_Control_20180727	-16.2067	1.14183	Control	EndoCap-a
CTTCTCTTCCAGAGGA_10X_Control_20181213	-16.2443	1.01454	Control	EndoCap-a
GCATGTATCCAAACAC_10X_Control_20180727	-15.9815	0.706567	Control	EndoCap-a
CACACCTCATGAACCT_10X_Control_20180727	-16.064	-0.273631	Control	EndoCap-a
GGGTTGCCATGGTAGG_10X_Control_20180727	-15.3883	1.57556	Control	EndoCap-a
TGACGGCAGGACATTA_10X_Control_20181213	-16.1111	0.516408	Control	EndoCap-a
CAGTAACAGTAAGTAC_10X_Hypoxia_20180727	-16.1152	-0.448079	Hypoxia	EndoCap-a
GAAGCAGCATCGGAAG_10X_Control_20180727	-15.2741	1.7868	Control	EndoCap-a
AACTTTCAGGCTAGAC_10X_Control_20181212	-15.0926	1.73038	Control	EndoCap-a
GTAACGTAGCTACCGC_10X_Hypoxia_20181213	-14.5256	-0.258481	Hypoxia	EndoCap-a
CACAAACAGGTTCCTA_10X_Control_20181212	-15.2608	1.42703	Control	EndoCap-a
CCCTCCTAGGGCTCTC_10X_Control_20180727	-15.0704	2.19108	Control	EndoCap-a
ATCCACCAGTACGACG_10X_Hypoxia_20180727	-14.7097	1.93324	Hypoxia	EndoCap-a
GTCAAGTAGATGTAAC_10X_Control_20181212	-16.0896	1.02767	Control	EndoCap-a
TGCCAAAGTTGCGTTA_10X_Hypoxia_20180727	-14.6448	-0.968471	Hypoxia	EndoCap-a
TATCAGGCAAGCGCTC_10X_Hypoxia_20181212	-15.2537	1.38971	Hypoxia	EndoCap-a
GGGACCTGTGAGTATA_10X_Control_20181212	-14.701	1.88814	Control	EndoCap-a
ACTGAGTGTCGACTAT_10X_Control_20180727	-16.1364	0.94537	Control	EndoCap-a
CTGTGCTGTTTGTTGG_10X_Hypoxia_20180727	-12.9809	-0.0284115	Hypoxia	EndoCap-a
GTGTTAGCAGTATGCT_10X_Hypoxia_20181213	-14.6651	-0.650362	Hypoxia	EndoCap-a
TAAGAGAAGGTGCAAC_10X_Hypoxia_20181212	-15.292	0.400303	Hypoxia	EndoCap-a
AGGCCGTAGTGGCACA_10X_Control_20181212	-14.1164	1.39578	Control	EndoCap-a
TTAGTTCCAGGCTCAC_10X_Control_20181212	-14.7159	1.12578	Control	EndoCap-a
CTCGAAACACGAAGCA_10X_Hypoxia_20181213	-13.7617	-0.489159	Hypoxia	EndoCap-a
GCTTGAAGTTCTGAAC_10X_Hypoxia_20180727	-14.2825	-0.0317041	Hypoxia	EndoCap-a
AGGGATGTCCGTACAA_10X_Control_20180727	-14.3834	0.806088	Control	EndoCap-a
GTAGTCAAGGCAAAGA_10X_Hypoxia_20181212	-14.7372	0.52908	Hypoxia	EndoCap-a
ACTGTCCTCCGCTGTT_10X_Hypoxia_20180727	-14.8624	0.949202	Hypoxia	EndoCap-a
GTAACTGTCTGTCCGT_10X_Hypoxia_20181213	-14.3965	0.352193	Hypoxia	EndoCap-a
GAACCTAAGAATTCCC_10X_Hypoxia_20180727	-14.5742	1.09516	Hypoxia	EndoCap-a
GTTCATTGTAGCGCAA_10X_Control_20180727	-14.8047	1.52829	Control	EndoCap-a
ACTTGTTCATTCTCAT_10X_Control_20181212	-14.555	1.66907	Control	EndoCap-a
TCTTCGGGTGAACCTT_10X_Control_20180727	-15.2612	1.44431	Control	EndoCap-a
TGTTCCGTCGGCTTGG_10X_Control_20180727	-15.6218	1.66142	Control	EndoCap-a
TACAGTGAGGGTCTCC_10X_Control_20181213	-15.4333	0.751146	Control	EndoCap-a
ATTCTACGTCAGCTAT_10X_Hypoxia_20180727	-15.3193	1.00724	Hypoxia	EndoCap-a
GCCAAATTCATGGTCA_10X_Control_20181212	-14.2128	1.4537	Control	EndoCap-a
TGGCGCAAGCACAGGT_10X_Control_20180727	-14.5494	1.19399	Control	EndoCap-a
CAAGGCCCACCTCGGA_10X_Hypoxia_20181212	-15.7385	-0.473567	Hypoxia	EndoCap-a
CTTACCGCATGGGACA_10X_Hypoxia_20180727	-14.4184	1.73744	Hypoxia	EndoCap-a
TGCCAAAGTCCGAATT_10X_Control_20181212	-14.1588	0.751479	Control	EndoCap-a
GTCATTTGTATAGTAG_10X_Control_20181213	-15.6799	1.69004	Control	EndoCap-a
AGTGGGACAGACGCCT_10X_Control_20180727	-15.9682	1.38036	Control	EndoCap-a
ACGGGTCCACTACAGT_10X_Hypoxia_20181212	-15.8326	0.715504	Hypoxia	EndoCap-a
TGGCTGGTCATCTGCC_10X_Control_20180727	-14.501	1.48043	Control	EndoCap-a
CGGACTGGTGTAATGA_10X_Hypoxia_20181212	-13.5276	0.724716	Hypoxia	EndoCap-a
GATCGTACACCTCGGA_10X_Control_20180727	-14.826	1.19474	Control	EndoCap-a
TGGGAAGCACATCCGG_10X_Hypoxia_20180727	-14.5011	0.0489564	Hypoxia	EndoCap-a
ACGCCGAGTTCCACTC_10X_Hypoxia_20181213	-15.0024	0.0165996	Hypoxia	EndoCap-a
AGAGCGAGTCTTCTCG_10X_Control_20181213	-16.394	0.848444	Control	EndoCap-a
GGTGAAGCACGAAATA_10X_Hypoxia_20181212	-14.8931	-0.21368	Hypoxia	EndoCap-a
GTGTGCGGTACAGTGG_10X_Control_20181212	-15.6321	0.213017	Control	EndoCap-a
CAGCATAAGAGACGAA_10X_Hypoxia_20181213	-13.2387	0.33973	Hypoxia	EndoCap-a
CTCCTAGCATCGACGC_10X_Control_20180727	-15.242	0.936489	Control	EndoCap-a
CTGTTTAGTGGCGAAT_10X_Hypoxia_20181212	-14.1979	-0.474997	Hypoxia	EndoCap-a
ACATCAGAGCTACCTA_10X_Control_20181213	-15.308	0.705987	Control	EndoCap-a
CAGCTGGCAAGCGAGT_10X_Control_20180727	-14.696	1.81788	Control	EndoCap-a
TTTACTGTCACAAACC_10X_Control_20180727	-15.1594	0.679793	Control	EndoCap-a
ATCTGCCAGGTGGGTT_10X_Control_20180727	-14.8851	0.290174	Control	EndoCap-a
CGGACGTCAGATAATG_10X_Control_20181212	-16.0452	-0.0308772	Control	EndoCap-a
TTCTCCTCAACGATCT_10X_Hypoxia_20181212	-13.2675	0.598893	Hypoxia	EndoCap-a
GATCGCGTCAGGCCCA_10X_Hypoxia_20181212	-14.7943	0.999398	Hypoxia	EndoCap-a
AAACCTGCATCGACGC_10X_Control_20180727	-14.711	-0.569739	Control	EndoCap-a
CGTCCATAGTCCGGTC_10X_Hypoxia_20180727	-13.2614	0.814562	Hypoxia	EndoCap-a
CCTACACAGTGTTGAA_10X_Hypoxia_20181213	-13.3806	0.484314	Hypoxia	EndoCap-a
AATCCAGGTCCGTGAC_10X_Hypoxia_20180727	-15.0563	-0.502447	Hypoxia	EndoCap-a
AGCTTGAGTCGCTTTC_10X_Hypoxia_20181212	-15.0311	-0.912466	Hypoxia	EndoCap-a
GCAGTTACAGCTTCGG_10X_Control_20180727	-16.3653	1.58188	Control	EndoCap-a
ACTGATGCATGTCCTC_10X_Control_20180727	-14.0721	0.153809	Control	EndoCap-a
GGCAATTGTATTCGTG_10X_Control_20181213	-15.575	0.45006	Control	EndoCap-a
CGATTGAGTAGCGTCC_10X_Control_20180727	-14.6997	1.76476	Control	EndoCap-a
AGACGTTGTAGGAGTC_10X_Control_20180727	-13.4792	1.26773	Control	EndoCap-a
TCAGCAACACCGAATT_10X_Hypoxia_20180727	-15.1744	0.0190374	Hypoxia	EndoCap-a
TGAGCCGAGGCGTACA_10X_Control_20181212	-15.791	1.38736	Control	EndoCap-a
TCGCGTTAGCGAGAAA_10X_Hypoxia_20181213	-13.769	-0.118916	Hypoxia	EndoCap-a
TCGGGACGTCCATCCT_10X_Hypoxia_20181213	-15.7908	-0.00554306	Hypoxia	EndoCap-a
CGCTGGATCGGCGCAT_10X_Control_20181212	-14.443	1.08164	Control	EndoCap-a
ACGCAGCGTTACCGAT_10X_Control_20180727	-14.7467	1.5834	Control	EndoCap-a
TTGGAACAGGAATTAC_10X_Control_20181212	-15.8184	1.97256	Control	EndoCap-a
AGGTCCGCATTACCTT_10X_Hypoxia_20180727	-14.8215	-0.561322	Hypoxia	EndoCap-a
TTGCGTCGTTCCAACA_10X_Control_20180727	-14.6385	1.62877	Control	EndoCap-a
TTAGTTCCACCATGTA_10X_Hypoxia_20180727	-13.7862	0.735611	Hypoxia	EndoCap-a
GCGCGATTCATCGATG_10X_Hypoxia_20181212	-15.8927	1.08656	Hypoxia	EndoCap-a
TTGACTTGTTAAGGGC_10X_Control_20181213	-15.1397	0.845823	Control	EndoCap-a
CTCGGAGTCAGTCCCT_10X_Control_20181212	-16.3669	0.123265	Control	EndoCap-a
TTTGCGCGTAGCGTAG_10X_Hypoxia_20180727	-15.4831	-0.212543	Hypoxia	EndoCap-a
GTAACTGCACTGCCAG_10X_Hypoxia_20180727	-14.4162	0.62415	Hypoxia	EndoCap-a
CTCTAATTCTGTCTAT_10X_Control_20180727	-15.4188	0.189515	Control	EndoCap-a
CTGAAGTAGTCCATAC_10X_Hypoxia_20180727	-14.0389	0.0728624	Hypoxia	EndoCap-a
CACCACTTCTTGCAAG_10X_Hypoxia_20181213	-14.8983	-1.17414	Hypoxia	EndoCap-a
TGAGCCGTCGAATGGG_10X_Hypoxia_20181212	-14.149	-0.476694	Hypoxia	EndoCap-a
ACTTGTTAGGCCCTCA_10X_Hypoxia_20181213	-14.5757	1.10836	Hypoxia	EndoCap-a
GTCTTCGTCTCGTTTA_10X_Control_20181212	-15.6462	1.64977	Control	EndoCap-a
ACTTGTTCAGCTGTTA_10X_Hypoxia_20181212	-13.9644	0.472963	Hypoxia	EndoCap-a
GATTCAGTCTGCAAGT_10X_Control_20181212	-15.813	1.38316	Control	EndoCap-a
ACTGAACCACAGACTT_10X_Control_20181212	-14.4129	1.29095	Control	EndoCap-a
CCTTCGAAGTAGGTGC_10X_Hypoxia_20180727	-15.6294	1.08386	Hypoxia	EndoCap-a
AGGCCACTCCTAAGTG_10X_Hypoxia_20181212	-15.5994	0.808058	Hypoxia	EndoCap-a
GCCAAATTCAACCAAC_10X_Control_20181212	-15.3113	0.36797	Control	EndoCap-a
GTACTCCCAGACGCCT_10X_Hypoxia_20180727	-14.015	-0.634089	Hypoxia	EndoCap-a
ATAACGCTCCGTTGCT_10X_Control_20180727	-15.4036	0.48063	Control	EndoCap-a
AGGTCATCACAGGCCT_10X_Control_20181212	-16.3306	0.882687	Control	EndoCap-a
GAACCTAGTCCATGAT_10X_Hypoxia_20181212	-15.1795	1.2494	Hypoxia	EndoCap-a
CATCGGGGTAAGCACG_10X_Control_20181212	-13.5509	0.272999	Control	EndoCap-a
GAACATCAGAGACTAT_10X_Control_20180727	-15.558	1.88411	Control	EndoCap-a
CTACCCAAGTGTACTC_10X_Control_20181212	-15.2734	0.0378532	Control	EndoCap-a
TCAATCTCACAAGCCC_10X_Hypoxia_20180727	-16.3398	1.30386	Hypoxia	EndoCap-a
TCAATCTAGATATACG_10X_Hypoxia_20181212	-15.637	-0.98435	Hypoxia	EndoCap-a
ACCCACTAGACCTAGG_10X_Control_20181212	-15.2924	1.11224	Control	EndoCap-a
CCTTCCCAGGCATGGT_10X_Control_20180727	-15.8758	1.43225	Control	EndoCap-a
AGTGAGGCATTGCGGC_10X_Hypoxia_20180727	-15.5244	-0.418312	Hypoxia	EndoCap-a
ACAGCTATCACTTATC_10X_Hypoxia_20180727	-15.0529	1.47546	Hypoxia	EndoCap-a
TTTGGTTAGCTCAACT_10X_Hypoxia_20181213	-13.6771	1.48856	Hypoxia	EndoCap-a
GACGTTACAGCGTTCG_10X_Hypoxia_20181212	-14.1774	1.31682	Hypoxia	EndoCap-a
GCATGCGCAATGGAGC_10X_Hypoxia_20180727	-15.7073	1.6847	Hypoxia	EndoCap-a
TACACGATCCCAAGAT_10X_Hypoxia_20181213	-13.6949	0.462544	Hypoxia	EndoCap-a
ATGTGTGTCGCAAGCC_10X_Control_20181212	-15.2522	1.82766	Control	EndoCap-a
GAATGAACAAGCTGGA_10X_Hypoxia_20181212	-15.3116	0.16147	Hypoxia	EndoCap-a
GCTGCAGCAGCCAATT_10X_Hypoxia_20181212	-14.1143	0.419027	Hypoxia	EndoCap-a
TGGACGCAGACTTTCG_10X_Control_20181212	-13.843	0.0299159	Control	EndoCap-a
GTACTTTGTGACTCAT_10X_Hypoxia_20180727	-15.6591	-0.595085	Hypoxia	EndoCap-a
TCACAAGTCATACGGT_10X_Control_20180727	-14.1948	1.6423	Control	EndoCap-a
AAGGTTCTCCGGGTGT_10X_Hypoxia_20181212	-13.5811	0.460024	Hypoxia	EndoCap-a
GTCAAGTGTCTAGGTT_10X_Control_20181213	-15.5189	1.59859	Control	EndoCap-a
TTATGCTTCTACCTGC_10X_Control_20180727	-14.7498	0.65823	Control	EndoCap-a
CATTCGCAGTGTTAGA_10X_Control_20180727	-15.3886	0.52245	Control	EndoCap-a
CAACCAAGTAGCTAAA_10X_Control_20180727	-14.3891	1.34453	Control	EndoCap-a
TTTGTCAAGACCTAGG_10X_Hypoxia_20180727	-14.6203	0.921186	Hypoxia	EndoCap-a
GTATCTTGTATAATGG_10X_Hypoxia_20181213	-16.0045	0.0230952	Hypoxia	EndoCap-a
CTGCGGACAGAGTGTG_10X_Hypoxia_20181212	-13.4152	0.17072	Hypoxia	EndoCap-a
CACACAACACCGAAAG_10X_Hypoxia_20181212	-14.867	0.392285	Hypoxia	EndoCap-a
ACTGTCCCAGCTGTGC_10X_Control_20181213	-15.2809	1.81125	Control	EndoCap-a
GATCGATTCCGTTGCT_10X_Control_20180727	-14.0596	1.21295	Control	EndoCap-a
AGTGTCATCATATCGG_10X_Hypoxia_20180727	-15.5957	1.74357	Hypoxia	EndoCap-a
TAAACCGGTGTTTGTG_10X_Control_20180727	-15.7818	1.83337	Control	EndoCap-a
ATTATCCCAACACCCG_10X_Control_20180727	-15.8643	1.49358	Control	EndoCap-a
TGCTACCTCTGCGTAA_10X_Hypoxia_20181213	-14.191	-0.3182	Hypoxia	EndoCap-a
CCTACCAGTTCCGGCA_10X_Control_20181213	-16.1393	0.915109	Control	EndoCap-a
TCTGGAACATCCTAGA_10X_Control_20180727	-15.5779	1.78108	Control	EndoCap-a
ATCTACTAGCAATATG_10X_Hypoxia_20180727	-15.7782	0.833635	Hypoxia	EndoCap-a
CGTTCTGTCCTTGACC_10X_Hypoxia_20181213	-14.2549	0.481692	Hypoxia	EndoCap-a
CATATGGGTCACAAGG_10X_Hypoxia_20180727	-14.3192	-0.686691	Hypoxia	EndoCap-a
GTTACAGGTAGGACAC_10X_Hypoxia_20181213	-15.2616	0.37297	Hypoxia	EndoCap-a
GAAGCAGGTAATTGGA_10X_Control_20181213	-14.6925	1.5148	Control	EndoCap-a
GCATGTAGTCGAGTTT_10X_Control_20181212	-14.7411	-0.261513	Control	EndoCap-a
CAGATCAGTGTAAGTA_10X_Control_20181212	-14.705	1.9009	Control	EndoCap-a
GTTACAGCAAACAACA_10X_Control_20180727	-13.1398	-1.27288	Control	EndoCap-a
CTTCTCTAGCCCAGCT_10X_Hypoxia_20181213	-14.8789	-0.601478	Hypoxia	EndoCap-a
TTGCGTCCACATCTTT_10X_Hypoxia_20181212	-14.7284	-0.842366	Hypoxia	EndoCap-a
GCATGATCACGCATCG_10X_Control_20180727	-14.3668	-0.00643046	Control	EndoCap-a
GACAGAGCATGGTCAT_10X_Control_20181212	-14.8049	0.352069	Control	EndoCap-a
TTAACTCGTTATGCGT_10X_Hypoxia_20181212	-14.1807	0.402844	Hypoxia	EndoCap-a
GGCGTGTCACGCTTTC_10X_Hypoxia_20180727	-13.5811	-0.390352	Hypoxia	EndoCap-a
GTGTTAGAGATCTGAA_10X_Hypoxia_20181213	-13.2709	0.305415	Hypoxia	EndoCap-a
GATCGCGCACCATCCT_10X_Control_20181213	-15.4972	1.70499	Control	EndoCap-a
CGACTTCAGTAGTGCG_10X_Hypoxia_20181213	-14.5798	-0.396834	Hypoxia	EndoCap-a
TCTCTAACAAATCCGT_10X_Hypoxia_20181212	-15.9195	0.7762	Hypoxia	EndoCap-a
CATCCACTCACAGGCC_10X_Hypoxia_20181212	-13.6555	0.334055	Hypoxia	EndoCap-a
CGGAGCTCAATAGCGG_10X_Control_20181213	-14.6635	2.21621	Control	EndoCap-a
TTGCCGTCAGTGAGTG_10X_Hypoxia_20181213	-13.1722	-1.16921	Hypoxia	EndoCap-a
CAGAATCTCATTCACT_10X_Hypoxia_20181212	-16.0853	-0.0227347	Hypoxia	EndoCap-a
CTCGAAAGTACAAGTA_10X_Hypoxia_20181213	-13.5235	-0.492062	Hypoxia	EndoCap-a
GGCTGGTTCCGTAGGC_10X_Control_20181212	-14.7447	2.14525	Control	EndoCap-a
TACTCGCCAATCAGAA_10X_Control_20181212	-15.4212	1.31205	Control	EndoCap-a
CACACCTCATTAGCCA_10X_Control_20181213	-14.9123	1.10793	Control	EndoCap-a
GCGCAACAGAAACCGC_10X_Hypoxia_20181213	-13.9033	-0.577231	Hypoxia	EndoCap-a
TCAGATGCATCCGGGT_10X_Hypoxia_20180727	-15.6146	-0.267493	Hypoxia	EndoCap-a
CACAAACAGCTAGTGG_10X_Hypoxia_20181213	-15.4414	1.06459	Hypoxia	EndoCap-a
GTCGTAACAATAGCGG_10X_Hypoxia_20181213	-14.9454	-0.894619	Hypoxia	EndoCap-a
GGGAATGAGAGCTATA_10X_Hypoxia_20180727	-13.7124	0.82612	Hypoxia	EndoCap-a
GCACTCTCATCCGGGT_10X_Control_20180727	-15.8896	0.174384	Control	EndoCap-a
TCTCATAGTGGCTCCA_10X_Control_20180727	-13.8326	0.389169	Control	EndoCap-a
TCGTACCTCTCCTATA_10X_Hypoxia_20180727	-13.3484	0.0530628	Hypoxia	EndoCap-a
GTGTTAGTCAACACTG_10X_Hypoxia_20181213	-14.7191	0.188245	Hypoxia	EndoCap-a
AAACCTGGTGAGGGAG_10X_Control_20181213	-15.0677	1.62339	Control	EndoCap-a
TAAACCGGTCGAAAGC_10X_Control_20181212	-16.0171	0.123288	Control	EndoCap-a
ACACTGACAGCGATCC_10X_Hypoxia_20181213	-15.1205	0.0394165	Hypoxia	EndoCap-a
ATCATCTTCAAAGTAG_10X_Hypoxia_20181212	-15.1613	-0.0225324	Hypoxia	EndoCap-a
TTTCCTCAGGTCATCT_10X_Hypoxia_20180727	-13.6886	0.209267	Hypoxia	EndoCap-a
CGAATGTCAACGCACC_10X_Control_20181212	-13.3776	0.823459	Control	EndoCap-a
TGTGTTTAGCTCCTTC_10X_Hypoxia_20181212	-15.2079	-0.179815	Hypoxia	EndoCap-a
TCAATCTCAACTGGCC_10X_Control_20181213	-13.9756	1.3778	Control	EndoCap-a
AGAGCTTTCAACACCA_10X_Hypoxia_20181213	-14.6813	0.718298	Hypoxia	EndoCap-a
CGAGCACTCCTCAATT_10X_Hypoxia_20180727	-15.8998	0.698285	Hypoxia	EndoCap-a
AACTCAGGTTCAGACT_10X_Hypoxia_20181212	-15.8954	0.178463	Hypoxia	EndoCap-a
AGGGAGTCACGGCTAC_10X_Control_20181212	-16.1174	-0.349139	Control	EndoCap-a
AAACCTGTCACCGTAA_10X_Control_20181213	-15.4336	1.98172	Control	EndoCap-a
ACGCCGATCTGACCTC_10X_Hypoxia_20180727	-13.2577	1.84378	Hypoxia	EndoCap-a
TTCGAAGGTAAAGGAG_10X_Control_20180727	-14.779	1.35349	Control	EndoCap-a
GTATCTTCACCACGTG_10X_Control_20180727	-14.7389	0.439795	Control	EndoCap-a
GTAACTGAGGCTCAGA_10X_Control_20181212	-14.0527	-0.0462258	Control	EndoCap-a
GCGCAGTCACCAACCG_10X_Control_20180727	-14.6298	-0.490317	Control	EndoCap-a
CGAACATTCGGCGCTA_10X_Control_20181213	-15.1513	1.5248	Control	EndoCap-a
GTCATTTAGACATAAC_10X_Hypoxia_20181213	-14.4742	-0.244109	Hypoxia	EndoCap-a
CATCAAGCAGCTGCTG_10X_Hypoxia_20181212	-15.2764	-0.246733	Hypoxia	EndoCap-a
ACCAGTACATCGATGT_10X_Hypoxia_20181213	-13.6474	-0.666974	Hypoxia	EndoCap-a
TTTGCGCGTTGACGTT_10X_Hypoxia_20181213	-14.6488	0.288645	Hypoxia	EndoCap-a
TTTATGCGTATTCTCT_10X_Hypoxia_20181213	-15.7882	0.440931	Hypoxia	EndoCap-a
TGTATTCTCTAACTTC_10X_Control_20181212	-14.9434	1.56483	Control	EndoCap-a
CATTCGCGTAGCGTGA_10X_Control_20181212	-15.5919	-0.22736	Control	EndoCap-a
TTCTCCTCACCAGGTC_10X_Control_20181212	-15.012	1.94706	Control	EndoCap-a
TCGGGACTCTTTACGT_10X_Hypoxia_20181213	-15.5092	-0.472844	Hypoxia	EndoCap-a
GCTCCTACAGGGAGAG_10X_Hypoxia_20180727	-15.7915	0.0846233	Hypoxia	EndoCap-a
ACACTGAAGTCCCACG_10X_Control_20181213	-15.54	0.663813	Control	EndoCap-a
GAATAAGGTTCAGCGC_10X_Hypoxia_20180727	-15.0168	0.552106	Hypoxia	EndoCap-a
ACTGATGCAGACTCGC_10X_Control_20180727	-14.1594	1.1904	Control	EndoCap-a
GTAACGTGTTCGCGAC_10X_Hypoxia_20180727	-16.1226	1.41683	Hypoxia	EndoCap-a
GGAATAACACAACGCC_10X_Hypoxia_20180727	-15.4486	0.840602	Hypoxia	EndoCap-a
TGATTTCCAATAGCAA_10X_Control_20181212	-15.7429	1.47796	Control	EndoCap-a
CGTCTACAGGCCGAAT_10X_Control_20181213	-15.5204	0.265565	Control	EndoCap-a
CAGCGACAGCGCTTAT_10X_Hypoxia_20181212	-14.2707	0.528656	Hypoxia	EndoCap-a
TTCTCAACAATAGCGG_10X_Control_20181212	-14.4194	1.53882	Control	EndoCap-a
TTCCCAGCAAACGTGG_10X_Control_20181212	-13.8164	0.868125	Control	EndoCap-a
TCACAAGTCATAGCAC_10X_Control_20181213	-15.5266	0.270287	Control	EndoCap-a
TATGCCCTCTGTCTCG_10X_Control_20180727	-14.7686	1.46995	Control	EndoCap-a
ACTTTCAAGCCACGCT_10X_Control_20180727	-15.553	1.31642	Control	EndoCap-a
CTCACACCAATGGAAT_10X_Control_20180727	-15.7577	0.335406	Control	EndoCap-a
ATCTACTCACTAAGTC_10X_Hypoxia_20181213	-15.84	0.502398	Hypoxia	EndoCap-a
CATGCCTCACGACTCG_10X_Control_20180727	-15.6392	0.286587	Control	EndoCap-a
AGAGTGGTCGACAGCC_10X_Control_20181213	-15.6279	1.13708	Control	EndoCap-a
CTTACCGTCTGAGGGA_10X_Hypoxia_20180727	-15.7631	-0.55345	Hypoxia	EndoCap-a
TGGCCAGAGGCACATG_10X_Control_20181212	-15.3453	-0.763072	Control	EndoCap-a
AGGGATGCATGTAAGA_10X_Hypoxia_20180727	-14.0676	-0.783309	Hypoxia	EndoCap-a
TGCCCATCAGTCACTA_10X_Control_20180727	-15.2787	0.576664	Control	EndoCap-a
ACGATGTCAGGTCTCG_10X_Hypoxia_20181212	-14.758	-0.3022	Hypoxia	EndoCap-a
CACTCCAGTGTCTGAT_10X_Control_20180727	-15.4183	1.50933	Control	EndoCap-a
TTGAACGTCTTTCCTC_10X_Control_20181213	-15.3697	0.869774	Control	EndoCap-a
CCGTTCACACAGTCGC_10X_Control_20181213	-15.5932	0.644663	Control	EndoCap-a
GTACGTAAGCGCTTAT_10X_Control_20181212	-14.7737	1.64942	Control	EndoCap-a
AGGCCGTTCTATCGCC_10X_Hypoxia_20181213	-15.532	1.1026	Hypoxia	EndoCap-a
CGGAGTCAGGCAGGTT_10X_Hypoxia_20180727	-15.2186	0.30716	Hypoxia	EndoCap-a
CCCAATCTCGAATGCT_10X_Hypoxia_20181212	-14.5492	1.33052	Hypoxia	EndoCap-a
CAAGATCCAAGCGCTC_10X_Hypoxia_20180727	-13.389	0.621975	Hypoxia	EndoCap-a
TACTCATTCTAGCACA_10X_Hypoxia_20181212	-15.0498	1.18382	Hypoxia	EndoCap-a
AGCGTATTCTATCCCG_10X_Control_20181213	-16.2528	0.0843165	Control	EndoCap-a
GACTACAGTGACTCAT_10X_Control_20181213	-15.2431	0.756676	Control	EndoCap-a
AACCGCGCATGCCACG_10X_Control_20180727	-14.3145	0.105592	Control	EndoCap-a
AAACCTGCATAAAGGT_10X_Control_20181213	-15.4597	1.89492	Control	EndoCap-a
AGATTGCCAAGACACG_10X_Control_20180727	-13.7562	0.630892	Control	EndoCap-a
TTCTACATCCCTTGCA_10X_Hypoxia_20180727	-15.8931	-0.0833116	Hypoxia	EndoCap-a
CCACCTAAGATTACCC_10X_Hypoxia_20180727	-14.2979	0.0753127	Hypoxia	EndoCap-a
AGCTCTCAGATATGGT_10X_Control_20180727	-15.7593	1.33142	Control	EndoCap-a
CTTAACTCAGGTCTCG_10X_Control_20181212	-14.139	0.948579	Control	EndoCap-a
TACGGATCACTACAGT_10X_Control_20181213	-15.7529	1.79203	Control	EndoCap-a
TGAAAGATCCCTTGTG_10X_Hypoxia_20181212	-15.0401	-0.367095	Hypoxia	EndoCap-a
CTCAGAAAGACCGGAT_10X_Hypoxia_20180727	-13.673	-0.156918	Hypoxia	EndoCap-a
GCTGCTTCACGTAAGG_10X_Hypoxia_20181213	-13.778	0.14617	Hypoxia	EndoCap-a
CTACCCATCTGAGTGT_10X_Hypoxia_20180727	-13.2806	0.00922397	Hypoxia	EndoCap-a
ATGCGATCACCTCGTT_10X_Hypoxia_20180727	-15.651	-0.48125	Hypoxia	EndoCap-a
TGAAAGAAGAACTGTA_10X_Hypoxia_20181213	-14.5894	0.737719	Hypoxia	EndoCap-a
AGCGTATCATTCGACA_10X_Hypoxia_20181213	-15.8024	1.46952	Hypoxia	EndoCap-a
GACGGCTTCATGCAAC_10X_Control_20180727	-15.5514	-0.0764393	Control	EndoCap-a
TCCCGATCAGCCTATA_10X_Hypoxia_20180727	-13.5153	0.228349	Hypoxia	EndoCap-a
TGCTACCGTCGAGATG_10X_Control_20180727	-15.1733	0.703254	Control	EndoCap-a
CATGACAGTATCGCAT_10X_Control_20181212	-14.9361	0.733264	Control	EndoCap-a
TTCGGTCTCCTAAGTG_10X_Control_20181213	-13.3943	2.09518	Control	EndoCap-a
CACAGGCCACAAGCCC_10X_Hypoxia_20181212	-14.5025	-0.751363	Hypoxia	EndoCap-a
GAACATCCAGGATTGG_10X_Hypoxia_20181212	-15.5761	-0.00238978	Hypoxia	EndoCap-a
CACACTCCACCAGTTA_10X_Hypoxia_20181212	-15.7279	-0.135798	Hypoxia	EndoCap-a
CAGCTAAGTAGCTTGT_10X_Control_20180727	-15.0731	0.585441	Control	EndoCap-a
GTCACAAAGACAATAC_10X_Hypoxia_20180727	-14.0891	-0.536013	Hypoxia	EndoCap-a
TTATGCTGTGTTAAGA_10X_Control_20180727	-16.0653	0.354071	Control	EndoCap-a
AGCTCCTAGCCGGTAA_10X_Control_20181212	-13.6093	0.439713	Control	EndoCap-a
GCAGTTAAGAGGTTAT_10X_Control_20181213	-16.0099	1.09987	Control	EndoCap-a
AGATCTGGTAGAGGAA_10X_Control_20180727	-13.9975	0.374101	Control	EndoCap-a
GCTGGGTTCAGTTAGC_10X_Hypoxia_20180727	-13.876	1.08914	Hypoxia	EndoCap-a
TCGGTAACATGGTAGG_10X_Hypoxia_20180727	-14.1272	0.879665	Hypoxia	EndoCap-a
GGACAGAAGAAACCGC_10X_Control_20180727	-15.0563	-0.13926	Control	EndoCap-a
TACTTACCAAACTGCT_10X_Hypoxia_20180727	-14.2306	1.48363	Hypoxia	EndoCap-a
CTACCCAAGTACGTTC_10X_Control_20180727	-14.1263	0.871303	Control	EndoCap-a
TAGACCAGTATGCTTG_10X_Hypoxia_20180727	-15.3871	-0.0919761	Hypoxia	EndoCap-a
TCGAGGCCACGACGAA_10X_Hypoxia_20180727	-15.0331	0.348532	Hypoxia	EndoCap-a
TTCTACAGTATGAATG_10X_Control_20180727	-14.3214	-0.453707	Control	EndoCap-a
ACACCCTTCCCGGATG_10X_Control_20181213	-15.0535	0.524242	Control	EndoCap-a
CTACCCATCCCGGATG_10X_Control_20181212	-15.1036	1.33482	Control	EndoCap-a
CCAATCCAGGTAGCCA_10X_Hypoxia_20181213	-14.2404	0.158651	Hypoxia	EndoCap-a
CCTCTGAAGTGGAGTC_10X_Control_20181213	-14.5696	1.20342	Control	EndoCap-a
GCGAGAATCTTGAGGT_10X_Control_20181212	-15.4676	0.217905	Control	EndoCap-a
CATCGAATCATGCTCC_10X_Control_20180727	-15.4855	0.405168	Control	EndoCap-a
TTATGCTTCCGAGCCA_10X_Control_20180727	-14.9669	0.767722	Control	EndoCap-a
CGCCAAGGTGACCAAG_10X_Hypoxia_20180727	-14.6573	-0.3357	Hypoxia	EndoCap-a
CGTAGGCAGACGCAAC_10X_Hypoxia_20181213	-15.7669	-0.796799	Hypoxia	EndoCap-a
TAGCCGGCACTTAAGC_10X_Hypoxia_20181212	-13.9845	0.573249	Hypoxia	EndoCap-a
CGTTGGGCAGGTGGAT_10X_Hypoxia_20180727	-12.8855	-1.19238	Hypoxia	EndoCap-a
GATCGCGAGGTGTGGT_10X_Hypoxia_20180727	-15.4207	1.06344	Hypoxia	EndoCap-a
CAGATCAGTTGTTTGG_10X_Control_20180727	-15.4725	1.88269	Control	EndoCap-a
GAGCAGACACCAGGCT_10X_Control_20181212	-15.1725	-0.121556	Control	EndoCap-a
GCCAAATCATTGCGGC_10X_Hypoxia_20180727	-14.9969	1.17579	Hypoxia	EndoCap-a
ACGATGTGTAGGGTAC_10X_Control_20180727	-16.282	0.969468	Control	EndoCap-a
CTTAGGAGTTTACTCT_10X_Hypoxia_20180727	-14.4577	0.265042	Hypoxia	EndoCap-a
GGGATGAGTATCTGCA_10X_Hypoxia_20180727	-15.9418	-0.29873	Hypoxia	EndoCap-a
CCGTTCACATCCTAGA_10X_Control_20181213	-13.3178	0.28791	Control	EndoCap-a
AAGCCGCGTTAAAGTG_10X_Control_20180727	-14.6349	1.04095	Control	EndoCap-a
ATGAGGGGTGGCCCTA_10X_Control_20181212	-14.5085	0.595585	Control	EndoCap-a
CTCGTACTCCGCATAA_10X_Hypoxia_20180727	-15.4923	-0.718724	Hypoxia	EndoCap-a
GACAGAGTCCGAGCCA_10X_Control_20181213	-14.9186	1.19612	Control	EndoCap-a
CACATTTCACTTGGAT_10X_Hypoxia_20181212	-14.3251	0.366504	Hypoxia	EndoCap-a
TGTGGTAAGTTGAGTA_10X_Hypoxia_20181212	-15.9706	0.146607	Hypoxia	EndoCap-a
CTCACACTCGAGAGCA_10X_Hypoxia_20181212	-13.569	1.74461	Hypoxia	EndoCap-a
CGAATGTAGGTACTCT_10X_Hypoxia_20180727	-15.2471	1.8458	Hypoxia	EndoCap-a
CAGGTGCCAAAGAATC_10X_Hypoxia_20180727	-13.6621	0.502255	Hypoxia	EndoCap-a
CTGCGGAAGAGCTGCA_10X_Hypoxia_20180727	-14.4185	0.423999	Hypoxia	EndoCap-a
ATCACGAAGTACGACG_10X_Control_20180727	-13.751	1.14891	Control	EndoCap-a
TCAGGTATCCGAGCCA_10X_Hypoxia_20180727	-15.5444	-0.032829	Hypoxia	EndoCap-a
TGGGCGTGTTGACGTT_10X_Hypoxia_20180727	-14.4086	-0.949036	Hypoxia	EndoCap-a
ATGAGGGTCCTGTAGA_10X_Control_20181212	-14.2477	0.926119	Control	EndoCap-a
TACTCATTCAAACGGG_10X_Control_20180727	-15.1716	1.33319	Control	EndoCap-a
CAAGAAATCACCCTCA_10X_Hypoxia_20181212	-15.5063	0.833674	Hypoxia	EndoCap-a
CAACCTCTCCACTCCA_10X_Hypoxia_20181212	-13.885	-0.250104	Hypoxia	EndoCap-a
AACTCTTCATGGATGG_10X_Control_20180727	-14.1011	1.308	Control	EndoCap-a
GTGCAGCGTTGCGCAC_10X_Hypoxia_20180727	-15.3097	0.103956	Hypoxia	EndoCap-a
ACGGAGAGTCCTCTTG_10X_Control_20180727	-16.0875	-0.117675	Control	EndoCap-a
GTCACAACATGCCTAA_10X_Control_20180727	-15.5259	-0.26197	Control	EndoCap-a
CTGCTGTCATCGACGC_10X_Control_20181213	-16.2592	0.788262	Control	EndoCap-a
ACTGAACGTCGAATCT_10X_Hypoxia_20181212	-14.5889	0.977775	Hypoxia	EndoCap-a
TCAGCAAAGAACTGTA_10X_Hypoxia_20180727	-14.9442	-0.669053	Hypoxia	EndoCap-a
ACGCCAGGTGTTCTTT_10X_Hypoxia_20181213	-15.7737	1.41882	Hypoxia	EndoCap-a
CTTAACTGTCGTCTTC_10X_Control_20181212	-15.1576	2.27884	Control	EndoCap-a
CTGATAGTCTCCTATA_10X_Hypoxia_20181213	-15.9431	1.40279	Hypoxia	EndoCap-a
TACTCGCTCTCTGAGA_10X_Hypoxia_20180727	-15.4206	0.308006	Hypoxia	EndoCap-a
GATCGTAAGAAGATTC_10X_Hypoxia_20181213	-13.4268	1.03242	Hypoxia	EndoCap-a
AAGGTTCTCAGAGGTG_10X_Hypoxia_20181212	-15.767	1.15501	Hypoxia	EndoCap-a
ACACCCTTCCTTGCCA_10X_Hypoxia_20180727	-13.6247	-0.231408	Hypoxia	EndoCap-a
CGAGAAGAGTAAGTAC_10X_Control_20180727	-15.6952	1.78861	Control	EndoCap-a
CAGCCGACAAGCTGGA_10X_Hypoxia_20180727	-15.8911	-0.355917	Hypoxia	EndoCap-a
GTCTCGTCAACGATCT_10X_Hypoxia_20181213	-14.1454	0.0672597	Hypoxia	EndoCap-a
TTGAACGGTCAGAATA_10X_Control_20181213	-16.2541	0.439127	Control	EndoCap-a
AACTTTCTCTATCGCC_10X_Hypoxia_20181213	-13.6391	-0.133906	Hypoxia	EndoCap-a
CTCTACGTCCAGAAGG_10X_Hypoxia_20181213	-13.7155	-0.301594	Hypoxia	EndoCap-a
AGCTCTCCATAAGACA_10X_Hypoxia_20181213	-14.5538	0.661483	Hypoxia	EndoCap-a
ACGGGTCCAGTGGAGT_10X_Hypoxia_20181213	-14.3472	0.668617	Hypoxia	EndoCap-a
CTAACTTCAATACGCT_10X_Control_20181213	-14.4184	2.17119	Control	EndoCap-a
GCATACACACCACCAG_10X_Hypoxia_20180727	-13.5651	0.468254	Hypoxia	EndoCap-a
GTGTGCGAGCACACAG_10X_Hypoxia_20180727	-13.9885	1.25223	Hypoxia	EndoCap-a
CTGATCCGTTAAGAAC_10X_Hypoxia_20181212	-16.0081	0.789476	Hypoxia	EndoCap-a
TCGCGTTTCGCACTCT_10X_Hypoxia_20180727	-16.0988	1.56444	Hypoxia	EndoCap-a
GGGCATCCAATCCAAC_10X_Hypoxia_20181213	-14.3893	1.72075	Hypoxia	EndoCap-a
CGATCGGAGTCCGTAT_10X_Control_20180727	-15.0708	0.265385	Control	EndoCap-a
TATTACCAGGTGTTAA_10X_Control_20181213	-16.1458	1.56422	Control	EndoCap-a
TGGGCGTTCCCTCAGT_10X_Control_20181213	-15.5316	1.04062	Control	EndoCap-a
CTCTACGGTGTGCGTC_10X_Control_20181212	-14.8927	2.30099	Control	EndoCap-a
TTCTCAATCAGAGACG_10X_Control_20181212	-15.959	0.401777	Control	EndoCap-a
AGCTCCTAGGATGGTC_10X_Control_20181212	-14.6448	1.55612	Control	EndoCap-a
CTCCTAGGTCAGAAGC_10X_Hypoxia_20181213	-13.479	-0.536876	Hypoxia	EndoCap-a
TCAGGTAAGGAGTACC_10X_Hypoxia_20180727	-13.7305	0.387537	Hypoxia	EndoCap-a
GACACGCGTTCGGGCT_10X_Hypoxia_20180727	-16.2777	0.829337	Hypoxia	EndoCap-a
TGCTACCCACACATGT_10X_Hypoxia_20180727	-14.8813	0.570959	Hypoxia	EndoCap-a
TGTGGTATCCTATGTT_10X_Control_20180727	-16.1403	0.598875	Control	EndoCap-a
CGCTGGATCAGTGCAT_10X_Control_20181212	-15.5486	1.48064	Control	EndoCap-a
GCTCTGTAGGACAGAA_10X_Control_20180727	-14.4584	0.0866566	Control	EndoCap-a
CTCGAGGAGTCTCCTC_10X_Control_20181212	-15.2784	0.292156	Control	EndoCap-a
GTGCAGCGTACGCTGC_10X_Hypoxia_20181213	-15.0854	-0.829652	Hypoxia	EndoCap-a
GTGTTAGTCAACCATG_10X_Hypoxia_20181212	-16.2745	0.0856494	Hypoxia	EndoCap-a
TCAACGAGTTCAGGCC_10X_Control_20180727	-14.6627	0.505716	Control	EndoCap-a
TACGGGCGTAGCTAAA_10X_Control_20181213	-15.9297	0.275858	Control	EndoCap-a
ATCATCTGTCCTGCTT_10X_Control_20181212	-16.1281	0.425066	Control	EndoCap-a
TGATTTCAGTTTAGGA_10X_Control_20181212	-15.2491	0.650837	Control	EndoCap-a
GGCCGATAGACATAAC_10X_Hypoxia_20180727	-13.3742	1.63977	Hypoxia	EndoCap-a
TACGGATGTGCGCTTG_10X_Hypoxia_20181213	-15.0382	-0.10726	Hypoxia	EndoCap-a
GATCGATAGGGATACC_10X_Control_20181212	-14.7975	0.665675	Control	EndoCap-a
CGAATGTTCTCGTATT_10X_Hypoxia_20180727	-15.1346	-0.642612	Hypoxia	EndoCap-a
ACTTACTAGTAAGTAC_10X_Control_20181213	-15.7301	1.42339	Control	EndoCap-a
GTTACAGTCGCGATCG_10X_Hypoxia_20180727	-14.5869	0.240554	Hypoxia	EndoCap-a
GTGGGTCGTACGCTGC_10X_Hypoxia_20181213	-14.9016	-0.490256	Hypoxia	EndoCap-a
TATCAGGTCCTCTAGC_10X_Hypoxia_20180727	-13.91	2.01317	Hypoxia	EndoCap-a
CCACTACGTTATGTGC_10X_Control_20180727	-15.7617	0.742696	Control	EndoCap-a
CCTTTCTAGACTTGAA_10X_Control_20181213	-15.8054	1.15913	Control	EndoCap-a
GTCTTCGCATGCTGGC_10X_Control_20181212	-14.3422	1.32125	Control	EndoCap-a
AGCGTCGGTTGGAGGT_10X_Control_20181212	-16.2873	0.131933	Control	EndoCap-a
GGTGTTACAGGAATCG_10X_Control_20181212	-15.3553	2.2703	Control	EndoCap-a
TACGGGCGTGTGACGA_10X_Hypoxia_20180727	-14.4904	0.618138	Hypoxia	EndoCap-a
TTCCCAGGTAAGAGGA_10X_Control_20181212	-15.4978	1.82359	Control	EndoCap-a
AACGTTGCAACTGGCC_10X_Hypoxia_20180727	-15.4055	-0.214683	Hypoxia	EndoCap-a
TGGACGCGTCATGCCG_10X_Hypoxia_20180727	-14.8102	-0.709655	Hypoxia	EndoCap-a
GACGTGCCATGTCTCC_10X_Hypoxia_20181213	-16.2999	0.317718	Hypoxia	EndoCap-a
GCATGTAGTGTGACCC_10X_Control_20181212	-15.4349	2.00438	Control	EndoCap-a
CCGTTCATCCTCGCAT_10X_Control_20180727	-14.5645	1.96925	Control	EndoCap-a
ACGAGCCAGCGCTCCA_10X_Hypoxia_20180727	-13.178	0.396834	Hypoxia	EndoCap-a
CGATCGGTCCAAACTG_10X_Hypoxia_20180727	-14.6705	-0.524568	Hypoxia	EndoCap-a
ATTATCCGTATAGTAG_10X_Control_20181212	-16.1022	1.7142	Control	EndoCap-a
ACCTTTACATGAGCGA_10X_Control_20180727	-15.9941	0.509649	Control	EndoCap-a
TACTCGCGTCTGCGGT_10X_Hypoxia_20180727	-13.8105	-0.193582	Hypoxia	EndoCap-a
AGGCCGTCACGGACAA_10X_Control_20181212	-15.7889	0.645923	Control	EndoCap-a
TGTGGTACATGCCCGA_10X_Hypoxia_20180727	-13.9471	-0.425117	Hypoxia	EndoCap-a
GCCAAATTCCCATTTA_10X_Control_20181213	-16.1506	1.05423	Control	EndoCap-a
GACACGCTCTCTTGAT_10X_Hypoxia_20180727	-14.7453	0.531617	Hypoxia	EndoCap-a
GCAATCAAGATGTGGC_10X_Hypoxia_20180727	-15.516	-0.716948	Hypoxia	EndoCap-a
CAAGGCCCATTGCGGC_10X_Hypoxia_20180727	-15.7494	-0.288876	Hypoxia	EndoCap-a
TCGCGAGGTTCGCTAA_10X_Control_20181212	-13.6026	-0.0883235	Control	EndoCap-a
TCAGGTATCACGACTA_10X_Control_20180727	-13.3685	0.204599	Control	EndoCap-a
AGTGGGATCACGAAGG_10X_Control_20180727	-15.468	1.72027	Control	EndoCap-a
TCTCTAACAGATCCAT_10X_Control_20181212	-15.8667	0.433304	Control	EndoCap-a
CGGAGTCAGGCCCTCA_10X_Hypoxia_20181213	-15.4296	0.102968	Hypoxia	EndoCap-a
CGCTATCGTCTAGCCG_10X_Control_20181213	-15.5807	1.835	Control	EndoCap-a
ACATCAGTCAGTTAGC_10X_Control_20181212	-15.3561	1.30025	Control	EndoCap-a
GTCAAGTAGCCGTCGT_10X_Hypoxia_20180727	-15.4267	1.77296	Hypoxia	EndoCap-a
GGGAGATAGACTAAGT_10X_Hypoxia_20180727	-14.0943	1.50063	Hypoxia	EndoCap-a
TGAGCCGCACCAGGCT_10X_Hypoxia_20180727	-15.0687	0.839775	Hypoxia	EndoCap-a
TCTCTAAGTATTCGTG_10X_Hypoxia_20180727	-14.0016	0.630486	Hypoxia	EndoCap-a
TTAACTCCACTAGTAC_10X_Control_20181213	-13.6256	1.97109	Control	EndoCap-a
TACCTTACAGGATTGG_10X_Control_20180727	-14.0305	0.489948	Control	EndoCap-a
CAAGTTGGTGTTTGTG_10X_Hypoxia_20180727	-14.0188	1.24054	Hypoxia	EndoCap-a
TACTTACCAATAGCGG_10X_Control_20181212	-16.1642	1.17423	Control	EndoCap-a
AAGGCAGAGGTAAACT_10X_Control_20181213	-15.1599	0.119359	Control	EndoCap-a
CTCACACCAGTTTACG_10X_Control_20181212	-15.2015	0.63795	Control	EndoCap-a
CGATTGAGTTCTGGTA_10X_Hypoxia_20181213	-13.8085	-0.465276	Hypoxia	EndoCap-a
GGACATTTCAGCCTAA_10X_Control_20180727	-14.0816	0.935436	Control	EndoCap-a
TACGGGCAGGCTAGCA_10X_Hypoxia_20180727	-15.28	-0.00932341	Hypoxia	EndoCap-a
CGGACGTAGTAGATGT_10X_Hypoxia_20181212	-14.2225	-0.108411	Hypoxia	EndoCap-a
ACGAGCCTCAGCACAT_10X_Hypoxia_20180727	-15.5276	0.0860714	Hypoxia	EndoCap-a
TTAGGACTCGCCAAAT_10X_Hypoxia_20181213	-14.3385	0.394624	Hypoxia	EndoCap-a
AGGCCACCATGGATGG_10X_Hypoxia_20180727	-15.9281	0.992893	Hypoxia	EndoCap-a
TGACAACCATATACGC_10X_Hypoxia_20181213	-16.1083	-0.0273774	Hypoxia	EndoCap-a
AACGTTGCATCGTCGG_10X_Hypoxia_20181213	-15.1378	0.978548	Hypoxia	EndoCap-a
CCACTACCAACTTGAC_10X_Hypoxia_20180727	-15.4505	1.45368	Hypoxia	EndoCap-a
GCTCCTACACGAAACG_10X_Control_20181212	-15.1586	0.129443	Control	EndoCap-a
TGAGAGGGTTACGGAG_10X_Hypoxia_20180727	-15.6815	0.626957	Hypoxia	EndoCap-a
AGTAGTCAGGGTCTCC_10X_Hypoxia_20180727	-14.6365	0.312095	Hypoxia	EndoCap-a
TACTTGTCATTCGACA_10X_Control_20181212	-14.1301	1.3896	Control	EndoCap-a
ACTTTCATCGGCTACG_10X_Control_20181212	-14.7568	1.06102	Control	EndoCap-a
CATCAGAAGTGTTAGA_10X_Hypoxia_20181212	-14.651	0.89881	Hypoxia	EndoCap-a
GCATGATTCCCAAGTA_10X_Hypoxia_20181213	-13.6757	0.665813	Hypoxia	EndoCap-a
ACACTGACATCTACGA_10X_Hypoxia_20180727	-14.7512	0.413415	Hypoxia	EndoCap-a
GTCTCGTGTTGCCTCT_10X_Hypoxia_20181212	-14.5399	1.41882	Hypoxia	EndoCap-a
CTTGGCTGTTACAGAA_10X_Hypoxia_20180727	-15.0026	0.29999	Hypoxia	EndoCap-a
ACTGAGTCAGGTGCCT_10X_Hypoxia_20180727	-15.1842	-0.7363	Hypoxia	EndoCap-a
AACTCAGGTGCAACGA_10X_Control_20180727	-14.9431	1.5836	Control	EndoCap-a
CTCGAGGAGTGAAGTT_10X_Control_20180727	-15.163	0.76082	Control	EndoCap-a
GTCAAGTGTGAGGGAG_10X_Control_20180727	-15.8856	1.65485	Control	EndoCap-a
TGGCGCACAGTAAGCG_10X_Control_20181213	-15.9063	-0.28178	Control	EndoCap-a
TTCGAAGTCCTTCAAT_10X_Hypoxia_20180727	-14.6741	-0.29996	Hypoxia	EndoCap-a
CTACGTCAGAGCTATA_10X_Control_20180727	-15.2331	1.78353	Control	EndoCap-a
CTCGAAACATGCTAGT_10X_Hypoxia_20180727	-13.6463	0.4897	Hypoxia	EndoCap-a
TGGGCGTTCTACTATC_10X_Hypoxia_20180727	-13.7451	0.258664	Hypoxia	EndoCap-a
CGGTTAACACGCTTTC_10X_Control_20181212	-14.5466	1.59903	Control	EndoCap-a
CTGCTGTGTCAGAGGT_10X_Hypoxia_20181213	-14.4323	-0.282101	Hypoxia	EndoCap-a
AACCGCGAGAATAGGG_10X_Hypoxia_20181213	-13.6878	0.105716	Hypoxia	EndoCap-a
CATGCCTGTTCAACCA_10X_Hypoxia_20180727	-13.2661	0.672756	Hypoxia	EndoCap-a
CTCGAAACATCACGTA_10X_Hypoxia_20181213	-16.0993	1.13944	Hypoxia	EndoCap-a
TGCGCAGTCGTGACAT_10X_Hypoxia_20181212	-15.9755	0.682076	Hypoxia	EndoCap-a
ATTACTCCAATGAAAC_10X_Control_20181212	-15.0591	2.07199	Control	EndoCap-a
GTCATTTGTCACCTAA_10X_Hypoxia_20181212	-13.9737	-0.587305	Hypoxia	EndoCap-a
GGGTCTGCACATCCGG_10X_Control_20181213	-13.6567	0.99939	Control	EndoCap-a
TGAGCATTCACTATTC_10X_Control_20181212	-16.1388	-0.203345	Control	EndoCap-a
ACCCACTAGTGTCCCG_10X_Hypoxia_20181212	-16.3222	0.995988	Hypoxia	EndoCap-a
GCGACCACATTCTTAC_10X_Control_20180727	-15.3197	1.64453	Control	EndoCap-a
CTACATTTCGCCCTTA_10X_Control_20181212	-13.2862	1.95403	Control	EndoCap-a
TTCGGTCCAGCCAATT_10X_Hypoxia_20181213	-14.5583	0.261701	Hypoxia	EndoCap-a
GAATGAAAGAAGCCCA_10X_Control_20181213	-15.7592	1.05329	Control	EndoCap-a
CATCGAAAGTACGACG_10X_Hypoxia_20180727	-13.8223	1.82228	Hypoxia	EndoCap-a
GAACCTAGTGTTTGTG_10X_Control_20180727	-15.7617	1.51665	Control	EndoCap-a
AAGCCGCAGTCCGGTC_10X_Hypoxia_20181213	-13.4166	1.18915	Hypoxia	EndoCap-a
CATCGAAGTCCTGCTT_10X_Hypoxia_20180727	-15.4629	0.632847	Hypoxia	EndoCap-a
ACCGTAAGTGCGAAAC_10X_Hypoxia_20181213	-16.2028	0.363371	Hypoxia	EndoCap-a
TCATTACGTACCCAAT_10X_Hypoxia_20180727	-14.3977	0.478285	Hypoxia	EndoCap-a
CTCTACGTCATGTCCC_10X_Hypoxia_20180727	-14.88	1.19109	Hypoxia	EndoCap-a
CAGCGACGTGATAAAC_10X_Hypoxia_20180727	-14.9909	0.112098	Hypoxia	EndoCap-a
CGCTATCAGGCAATTA_10X_Control_20181213	-13.2606	2.13471	Control	EndoCap-a
ATCCGAAAGGTAGCTG_10X_Hypoxia_20180727	-15.1673	0.329124	Hypoxia	EndoCap-a
CTGATAGTCGCTTGTC_10X_Hypoxia_20181212	-15.714	-0.805729	Hypoxia	EndoCap-a
ACCGTAACAGTGAGTG_10X_Control_20181213	-15.9206	1.69142	Control	EndoCap-a
ATTCTACGTGCAACGA_10X_Hypoxia_20180727	-14.763	1.83359	Hypoxia	EndoCap-a
GATCGATGTAGAAAGG_10X_Control_20181212	-16.3396	0.297741	Control	EndoCap-a
TGAGCATAGGCTCAGA_10X_Hypoxia_20180727	-15.4673	1.86355	Hypoxia	EndoCap-a
CGCGTTTTCCCACTTG_10X_Hypoxia_20181212	-15.3973	0.262238	Hypoxia	EndoCap-a
CCGGTAGGTCCTGCTT_10X_Hypoxia_20180727	-15.8998	1.44661	Hypoxia	EndoCap-a
AACTCAGGTTGGTTTG_10X_Control_20181213	-15.9219	1.62237	Control	EndoCap-a
CTTCTCTAGGAGCGAG_10X_Hypoxia_20181213	-14.8648	-0.0422374	Hypoxia	EndoCap-a
ACGGGCTAGAAGGTGA_10X_Hypoxia_20181212	-15.8903	0.711032	Hypoxia	EndoCap-a
TCGGTAACAGGACGTA_10X_Control_20181212	-14.9133	1.00673	Control	EndoCap-a
AGGCCACTCTAGAGTC_10X_Control_20181213	-15.3982	1.76893	Control	EndoCap-a
CAGTCCTAGTGGTCCC_10X_Hypoxia_20181213	-15.3911	-0.451817	Hypoxia	EndoCap-a
TGGCCAGGTAATCGTC_10X_Control_20180727	-15.2898	0.232171	Control	EndoCap-a
CGAGAAGAGCATCATC_10X_Control_20181213	-15.2294	0.558526	Control	EndoCap-a
CTGAAGTTCGGTTCGG_10X_Hypoxia_20181212	-15.056	-0.177831	Hypoxia	EndoCap-a
TTCTTAGTCAAGGCTT_10X_Hypoxia_20181213	-15.8995	-0.669731	Hypoxia	EndoCap-a
GTCATTTCACGGTTTA_10X_Hypoxia_20181213	-13.3426	0.650383	Hypoxia	EndoCap-a
GGAAAGCGTAAACCTC_10X_Hypoxia_20181213	-15.52	-0.910029	Hypoxia	EndoCap-a
CGGACACCATCTATGG_10X_Control_20181213	-15.7394	1.70094	Control	EndoCap-a
AGGGATGCAAGCTGTT_10X_Hypoxia_20181212	-15.0556	1.77024	Hypoxia	EndoCap-a
AGCGTATAGGCTAGAC_10X_Hypoxia_20181213	-13.5837	-0.0768309	Hypoxia	EndoCap-a
TTCGAAGAGATCACGG_10X_Control_20181212	-14.753	2.0677	Control	EndoCap-a
TGTGGTATCGATGAGG_10X_Hypoxia_20181213	-14.2969	0.307733	Hypoxia	EndoCap-a
ACCAGTACATTGCGGC_10X_Control_20181213	-15.6792	0.655906	Control	EndoCap-a
GCGCAGTCAAGAGGCT_10X_Control_20180727	-15.3469	1.19905	Control	EndoCap-a
GGTATTGGTGTGTGCC_10X_Hypoxia_20180727	-14.4154	0.535654	Hypoxia	EndoCap-a
CCATTCGTCCAGTATG_10X_Hypoxia_20181212	-15.137	0.684317	Hypoxia	EndoCap-a
GAAACTCTCATGTCTT_10X_Hypoxia_20181213	-14.8935	-0.604953	Hypoxia	EndoCap-a
ACACCAAGTTATTCTC_10X_Hypoxia_20180727	-14.2269	0.71245	Hypoxia	EndoCap-a
ACAGCCGGTGGTGTAG_10X_Hypoxia_20181213	-15.2778	0.445526	Hypoxia	EndoCap-a
CCGGTAGAGCGTCTAT_10X_Control_20180727	-15.6163	1.3177	Control	EndoCap-a
TGAGGGATCGGCTTGG_10X_Hypoxia_20180727	-13.2009	0.604018	Hypoxia	EndoCap-a
TCGTAGAAGCGGCTTC_10X_Control_20180727	-15.2706	1.7461	Control	EndoCap-a
CATATGGTCTCGCATC_10X_Control_20181212	-14.8611	0.326915	Control	EndoCap-a
GGCAATTCATGATCCA_10X_Hypoxia_20180727	-15.2695	-0.32502	Hypoxia	EndoCap-a
AACTCTTGTCTAGTCA_10X_Control_20180727	-15.1255	1.3531	Control	EndoCap-a
GAACGGATCACCATAG_10X_Control_20180727	-15.509	1.39466	Control	EndoCap-a
TGAAAGACATGGGAAC_10X_Hypoxia_20180727	-16.1344	0.47436	Hypoxia	EndoCap-a
GCACTCTTCCACGAAT_10X_Hypoxia_20180727	-14.8491	1.41958	Hypoxia	EndoCap-a
ATAGACCGTCTGATTG_10X_Control_20181212	-15.9503	0.711073	Control	EndoCap-a
AGAGCTTGTTCCGTCT_10X_Hypoxia_20181212	-14.065	-0.814621	Hypoxia	EndoCap-a
CTGGTCTGTCCATGAT_10X_Control_20180727	-16.2458	0.560383	Control	EndoCap-a
ACGGGTCTCAGTCCCT_10X_Hypoxia_20180727	-15.4566	0.248424	Hypoxia	EndoCap-a
GTCTTCGCAAGTTGTC_10X_Hypoxia_20180727	-14.2795	0.373134	Hypoxia	EndoCap-a
TTGAACGTCAACGCTA_10X_Hypoxia_20181213	-14.6763	0.202052	Hypoxia	EndoCap-a
CAGAATCCAATCAGAA_10X_Control_20181213	-13.5539	2.09392	Control	EndoCap-a
CCTTCGAGTATGGTTC_10X_Control_20180727	-14.0983	0.833908	Control	EndoCap-a
AGTGAGGAGGCATGTG_10X_Hypoxia_20181213	-15.2351	-0.200624	Hypoxia	EndoCap-a
GGCGTGTAGTGCGATG_10X_Control_20181213	-15.5972	0.53117	Control	EndoCap-a
TTCGAAGAGCTCAACT_10X_Hypoxia_20181213	-15.2186	1.15268	Hypoxia	EndoCap-a
CCTACACTCTCTTGAT_10X_Control_20181212	-13.3071	1.01774	Control	EndoCap-a
CCGGGATGTTGATTCG_10X_Hypoxia_20180727	-14.6415	0.461952	Hypoxia	EndoCap-a
ATCGAGTGTAGAGCTG_10X_Control_20180727	-14.2468	1.46164	Control	EndoCap-a
GTCAAGTGTCGACTGC_10X_Hypoxia_20180727	-13.4393	1.39648	Hypoxia	EndoCap-a
ACTGATGCAGCCTTTC_10X_Control_20180727	-15.5121	0.449342	Control	EndoCap-a
CAGATCATCGGCTACG_10X_Hypoxia_20181213	-13.644	-0.527987	Hypoxia	EndoCap-a
AAGGCAGAGGGATGGG_10X_Hypoxia_20181213	-15.2498	-0.262054	Hypoxia	EndoCap-a
TGATTTCCACCAACCG_10X_Control_20181212	-13.5073	0.681785	Control	EndoCap-a
GCCTCTAGTCGCTTTC_10X_Control_20181212	-14.8032	-0.284569	Control	EndoCap-a
TTGGAACTCTTGACGA_10X_Hypoxia_20180727	-14.9768	-0.356788	Hypoxia	EndoCap-a
GTGCGGTCACACGCTG_10X_Hypoxia_20181213	-13.9468	-0.751651	Hypoxia	EndoCap-a
GGTATTGAGGGTCGAT_10X_Hypoxia_20181212	-15.5876	0.543314	Hypoxia	EndoCap-a
CGTAGGCTCCCATTAT_10X_Hypoxia_20180727	-14.9028	-0.976687	Hypoxia	EndoCap-a
TGCTGCTAGATATGGT_10X_Hypoxia_20180727	-16.1003	0.433681	Hypoxia	EndoCap-a
TGTCCCACACGAGGTA_10X_Hypoxia_20180727	-14.4677	-0.253119	Hypoxia	EndoCap-a
GGCGACTAGTAGGTGC_10X_Hypoxia_20181213	-15.5819	0.143479	Hypoxia	EndoCap-a
GTCCTCAAGGAGTCTG_10X_Hypoxia_20181212	-15.3636	0.191318	Hypoxia	EndoCap-a
AGGTCATGTACACCGC_10X_Hypoxia_20181213	-14.5315	0.56461	Hypoxia	EndoCap-a
CTGTTTATCTATCCCG_10X_Control_20180727	-15.0422	0.0669524	Control	EndoCap-a
TGGCCAGTCGCACTCT_10X_Control_20180727	-15.4403	1.38777	Control	EndoCap-a
ATTGGACGTATGAAAC_10X_Hypoxia_20181213	-15.8683	-0.00999706	Hypoxia	EndoCap-a
GAATAAGGTACTTAGC_10X_Control_20181213	-16.1662	1.32378	Control	EndoCap-a
TGCCAAAGTGCAACGA_10X_Control_20181212	-15.6026	0.780091	Control	EndoCap-a
GACCAATCAAGTACCT_10X_Hypoxia_20181212	-13.997	-0.509133	Hypoxia	EndoCap-a
GGCTCGAGTCGAATCT_10X_Hypoxia_20181212	-15.3156	-0.772592	Hypoxia	EndoCap-a
CTACACCCATGTCGAT_10X_Hypoxia_20181212	-14.9474	1.16466	Hypoxia	EndoCap-a
TCAGGATGTCAACTGT_10X_Hypoxia_20181213	-14.1948	-0.23176	Hypoxia	EndoCap-a
ACATGGTGTGACGGTA_10X_Control_20181213	-14.2305	1.98977	Control	EndoCap-a
GTGTTAGCACTAGTAC_10X_Control_20180727	-15.0752	0.0319281	Control	EndoCap-a
ACACCAATCGCAAGCC_10X_Hypoxia_20181213	-14.9054	0.401418	Hypoxia	EndoCap-a
TAAGTGCTCGTACCGG_10X_Hypoxia_20181213	-15.0896	-0.72605	Hypoxia	EndoCap-a
TCTCTAAGTCAGGACA_10X_Control_20180727	-16.3018	0.930301	Control	EndoCap-a
TCGGTAACAATCTACG_10X_Control_20181212	-15.7414	0.11935	Control	EndoCap-a
CGAATGTTCGGAAACG_10X_Hypoxia_20180727	-14.0641	-0.275704	Hypoxia	EndoCap-a
ACACTGATCAAACCAC_10X_Control_20181212	-15.4206	1.44185	Control	EndoCap-a
GACGCGTCAGGCTGAA_10X_Control_20180727	-14.5764	1.915	Control	EndoCap-a
AGTGAGGTCCGCATCT_10X_Hypoxia_20181212	-15.5449	-0.187621	Hypoxia	EndoCap-a
CAAGAAACAATCTACG_10X_Control_20181212	-14.2662	2.18288	Control	EndoCap-a
GGAATAATCGGCTACG_10X_Hypoxia_20181212	-14.2269	1.84499	Hypoxia	EndoCap-a
GCTTGAATCATAACCG_10X_Hypoxia_20181213	-15.8705	1.53164	Hypoxia	EndoCap-a
CTTCTCTTCCAAGTAC_10X_Control_20180727	-14.7243	1.83806	Control	EndoCap-a
TCACAAGGTAGCCTCG_10X_Control_20181213	-14.6218	0.74488	Control	EndoCap-a
ATTCTACGTCGGGTCT_10X_Hypoxia_20181212	-15.4972	-0.960374	Hypoxia	EndoCap-a
CAGCAGCCACAACGCC_10X_Control_20181213	-14.8065	0.907836	Control	EndoCap-a
ATAAGAGGTTCTGGTA_10X_Control_20181212	-15.8262	1.47457	Control	EndoCap-a
TAGAGCTAGAGTGAGA_10X_Control_20181213	-14.7081	0.859891	Control	EndoCap-a
TCTGGAAAGTGGTAGC_10X_Control_20181213	-15.0749	1.88466	Control	EndoCap-a
TCGAGGCGTTCGGGCT_10X_Control_20181212	-14.5804	1.51392	Control	EndoCap-a
CACACAAAGGGCTCTC_10X_Hypoxia_20181213	-13.749	-0.242895	Hypoxia	EndoCap-a
TGGCCAGTCAGCAACT_10X_Control_20180727	-14.4363	2.12781	Control	EndoCap-a
TCCACACGTCTCATCC_10X_Hypoxia_20181213	-14.5065	-1.1669	Hypoxia	EndoCap-a
TTGTAGGCATCACCCT_10X_Hypoxia_20180727	-15.1471	-0.726405	Hypoxia	EndoCap-a
TAAGAGACAAGCGATG_10X_Control_20180727	-16.0604	0.509387	Control	EndoCap-a
CCAGCGATCGTTTAGG_10X_Hypoxia_20180727	-15.4809	-0.338263	Hypoxia	EndoCap-a
AGATCTGAGGCGACAT_10X_Control_20181212	-14.5105	-0.524594	Control	EndoCap-a
CCGGGATCAATGGTCT_10X_Hypoxia_20181213	-15.0606	-0.535424	Hypoxia	EndoCap-a
TAGTTGGAGTCAATAG_10X_Control_20180727	-15.5693	1.7558	Control	EndoCap-a
GGGCACTAGCGATGAC_10X_Control_20180727	-14.3193	0.177358	Control	EndoCap-a
GTACTCCCAGTGAGTG_10X_Hypoxia_20181212	-15.3825	-0.500292	Hypoxia	EndoCap-a
CACAAACTCTCATTCA_10X_Control_20180727	-14.892	2.31286	Control	EndoCap-a
CGGGTCATCTGGTATG_10X_Hypoxia_20180727	-15.4544	0.804905	Hypoxia	EndoCap-a
CGTAGGCAGCCACGCT_10X_Hypoxia_20180727	-14.9327	-0.530003	Hypoxia	EndoCap-a
ACGAGCCCATTAGGCT_10X_Control_20180727	-15.38	0.0332248	Control	EndoCap-a
CTTGGCTTCCTAGGGC_10X_Hypoxia_20181213	-15.8619	1.44688	Hypoxia	EndoCap-a
CCACGGACACCAGTTA_10X_Hypoxia_20180727	-13.8745	-0.341779	Hypoxia	EndoCap-a
AGGGATGAGCTGATAA_10X_Control_20181212	-15.8743	0.00248303	Control	EndoCap-a
CTAGCCTGTGACGCCT_10X_Hypoxia_20181212	-15.306	-0.432269	Hypoxia	EndoCap-a
GCAGCCATCTCGAGTA_10X_Hypoxia_20180727	-13.5732	0.194713	Hypoxia	EndoCap-a
CACCTTGAGACTCGGA_10X_Control_20180727	-14.7952	1.16501	Control	EndoCap-a
TACGGGCCAAATCCGT_10X_Control_20181213	-15.6229	0.415506	Control	EndoCap-a
ACCGTAACACTATCTT_10X_Control_20180727	-13.7564	0.747298	Control	EndoCap-a
GACGTGCCACCGGAAA_10X_Control_20181213	-15.3979	2.10584	Control	EndoCap-a
ATGGGAGGTAGTAGTA_10X_Hypoxia_20180727	-14.3629	0.724792	Hypoxia	EndoCap-a
CATATGGGTCGCATCG_10X_Hypoxia_20181213	-15.0793	0.420279	Hypoxia	EndoCap-a
GTGCAGCCACGCGAAA_10X_Control_20181212	-15.1074	1.58431	Control	EndoCap-a
CATCAAGAGCGTAGTG_10X_Hypoxia_20181213	-15.118	-0.861361	Hypoxia	EndoCap-a
TAAGAGATCTGTCTAT_10X_Control_20180727	-15.4231	1.97257	Control	EndoCap-a
TGTATTCCAGGAATGC_10X_Control_20180727	-15.9969	1.98772	Control	EndoCap-a
GGATGTTGTTCATGGT_10X_Hypoxia_20181213	-14.2588	-0.829616	Hypoxia	EndoCap-a
ACGGGCTGTGAGGGTT_10X_Control_20180727	-16.0541	1.2575	Control	EndoCap-a
GTACTCCTCCGGCACA_10X_Control_20181212	-14.6815	2.07427	Control	EndoCap-a
AACTCTTTCGTGTAGT_10X_Control_20180727	-15.2075	0.783845	Control	EndoCap-a
GTTCGGGGTTCAGGCC_10X_Hypoxia_20181212	-16.1488	0.959659	Hypoxia	EndoCap-a
AACTGGTCACACATGT_10X_Hypoxia_20180727	-13.0994	1.18697	Hypoxia	EndoCap-a
AAACGGGGTTCTGTTT_10X_Hypoxia_20180727	-15.5677	1.28659	Hypoxia	EndoCap-a
TCGGTAAGTCTCTTAT_10X_Hypoxia_20180727	-15.3384	0.679346	Hypoxia	EndoCap-a
AGTGTCATCCACGACG_10X_Hypoxia_20181213	-15.2209	0.233416	Hypoxia	EndoCap-a
CAGCCGACATCGATGT_10X_Control_20181212	-15.0285	0.170019	Control	EndoCap-a
GCATGCGCAGCTGCAC_10X_Control_20181212	-15.9445	1.36773	Control	EndoCap-a
CGGACGTCACAAGACG_10X_Control_20181213	-14.2386	1.16068	Control	EndoCap-a
CCTTCCCTCTTTAGTC_10X_Hypoxia_20181213	-15.6975	1.57688	Hypoxia	EndoCap-a
CACACAAAGTGCCATT_10X_Control_20181213	-15.4812	0.966556	Control	EndoCap-a
ACACCCTCAGGGTTAG_10X_Hypoxia_20181213	-13.3426	0.0062466	Hypoxia	EndoCap-a
GTTCTCGTCGCCCTTA_10X_Control_20181212	-15.7132	0.255723	Control	EndoCap-a
CATTCGCCAACACCCG_10X_Hypoxia_20180727	-15.2446	-0.810808	Hypoxia	EndoCap-a
CGGTTAACACGCGAAA_10X_Hypoxia_20180727	-13.9207	1.43146	Hypoxia	EndoCap-a
CAAGATCTCACAATGC_10X_Hypoxia_20180727	-13.423	0.0236368	Hypoxia	EndoCap-a
CGTAGCGCATAGAAAC_10X_Hypoxia_20181213	-14.7816	0.945012	Hypoxia	EndoCap-a
AACCATGTCCACTGGG_10X_Control_20181212	-14.7998	1.38088	Control	EndoCap-a
TATGCCCCATGCAATC_10X_Control_20180727	-14.5935	2.67491	Control	EndoCap-a
GTTCGGGTCTACTATC_10X_Control_20180727	-14.3082	0.374157	Control	EndoCap-a
CTTTGCGAGGTGCTTT_10X_Control_20181212	-14.8293	2.35397	Control	EndoCap-a
ACATCAGGTTGACGTT_10X_Control_20180727	-15.0729	0.84983	Control	EndoCap-a
TACGGATGTCTCAACA_10X_Control_20181213	-14.489	0.571822	Control	EndoCap-a
CCGGTAGGTTCCGTCT_10X_Control_20181212	-16.0115	0.810603	Control	EndoCap-a
CTAAGACTCAGTCAGT_10X_Control_20181212	-15.8612	1.4907	Control	EndoCap-a
TGCGTGGTCCAAGTAC_10X_Control_20180727	-13.4097	-0.103906	Control	EndoCap-a
TCTGGAAGTCTCCACT_10X_Control_20180727	-15.0488	-0.445062	Control	EndoCap-a
CGGAGTCTCCAGAAGG_10X_Control_20180727	-14.9783	0.71976	Control	EndoCap-a
TTTGCGCCAGGCAGTA_10X_Hypoxia_20180727	-15.9279	0.938257	Hypoxia	EndoCap-a
TTAACTCGTAGGGTAC_10X_Control_20180727	-13.9053	1.43019	Control	EndoCap-a
AAGGCAGGTAGTACCT_10X_Control_20181213	-14.9055	2.15702	Control	EndoCap-a
GGTGAAGGTTCGGCAC_10X_Control_20181212	-13.5457	0.630202	Control	EndoCap-a
TCGTAGACAGCCAATT_10X_Hypoxia_20181213	-15.3479	0.668625	Hypoxia	EndoCap-a
GCTTGAAAGACTGGGT_10X_Control_20181213	-15.0948	0.253064	Control	EndoCap-a
GTCGTAACACCACGTG_10X_Hypoxia_20181212	-15.894	0.226021	Hypoxia	EndoCap-a
TAGCCGGGTCACCCAG_10X_Hypoxia_20181213	-16.0383	-0.234594	Hypoxia	EndoCap-a
TGAGGGAGTTCTGGTA_10X_Control_20181212	-15.6503	-0.264954	Control	EndoCap-a
ACACCGGGTGGTCTCG_10X_Hypoxia_20181212	-14.6829	1.33031	Hypoxia	EndoCap-a
GCCAAATTCGGTGTCG_10X_Hypoxia_20180727	-15.2218	1.17237	Hypoxia	EndoCap-a
TAAGAGAAGCCGGTAA_10X_Hypoxia_20180727	-14.8809	1.58353	Hypoxia	EndoCap-a
TACCTATAGCCACGCT_10X_Hypoxia_20181213	-13.927	0.565189	Hypoxia	EndoCap-a
CGAGCCAAGTACACCT_10X_Control_20181212	-16.5211	0.452856	Control	EndoCap-a
TCGTACCTCATCGGAT_10X_Hypoxia_20181213	-13.8124	0.282019	Hypoxia	EndoCap-a
TGCCCTAAGCGACGTA_10X_Control_20180727	-13.5328	1.87152	Control	EndoCap-a
AAATGCCAGCTACCGC_10X_Control_20180727	-14.8497	2.49081	Control	EndoCap-a
ACAGCCGCAGCTCGAC_10X_Hypoxia_20181212	-14.6735	-0.797272	Hypoxia	EndoCap-a
TGAGGGAGTTAAGAAC_10X_Hypoxia_20180727	-14.5001	0.381028	Hypoxia	EndoCap-a
TGGCTGGAGTCGTTTG_10X_Control_20180727	-14.9384	1.98591	Control	EndoCap-a
AAGACCTTCTACTTAC_10X_Hypoxia_20180727	-15.7352	-0.301803	Hypoxia	EndoCap-a
CGAGAAGTCTTGCAAG_10X_Control_20181213	-14.6676	1.96383	Control	EndoCap-a
AGTGTCATCTTCATGT_10X_Hypoxia_20180727	-16.3256	1.40299	Hypoxia	EndoCap-a
ATAAGAGGTCCTCCAT_10X_Hypoxia_20181213	-15.6448	0.323748	Hypoxia	EndoCap-a
CGGGTCAAGATGTGGC_10X_Hypoxia_20181213	-13.3386	0.835307	Hypoxia	EndoCap-a
ACATGGTCACCGAAAG_10X_Hypoxia_20180727	-14.9054	0.40639	Hypoxia	EndoCap-a
GAGCAGAGTAGCTCCG_10X_Hypoxia_20181213	-15.5768	-0.779059	Hypoxia	EndoCap-a
ACACCAAGTACGCACC_10X_Hypoxia_20181212	-14.6961	-0.901503	Hypoxia	EndoCap-a
GGTATTGGTCGAAAGC_10X_Hypoxia_20181213	-15.7502	0.362413	Hypoxia	EndoCap-a
GATCGATCAAGGCTCC_10X_Control_20180727	-15.0928	1.54772	Control	EndoCap-a
TGTATTCCAGCTGCAC_10X_Control_20180727	-15.1363	-0.109486	Control	EndoCap-a
AACCGCGAGTTACGGG_10X_Control_20181212	-14.7348	1.69832	Control	EndoCap-a
AACTCTTAGCAATCTC_10X_Control_20181212	-13.281	2.11997	Control	EndoCap-a
GATGAGGCAATGGAGC_10X_Hypoxia_20181213	-15.2269	0.284927	Hypoxia	EndoCap-a
CTCGAGGCAGGACCCT_10X_Control_20180727	-15.0637	2.13781	Control	EndoCap-a
CACACTCAGGTTACCT_10X_Control_20181212	-15.1954	1.89404	Control	EndoCap-a
TTTCCTCGTTTGGCGC_10X_Control_20181212	-16.0348	-0.0206424	Control	EndoCap-a
AGAGCGACATAAAGGT_10X_Hypoxia_20181213	-15.3437	-0.819985	Hypoxia	EndoCap-a
CCTCAGTCACACCGAC_10X_Hypoxia_20180727	-13.9715	0.695536	Hypoxia	EndoCap-a
GAGCAGAAGTTCCACA_10X_Hypoxia_20181212	-14.7831	0.258708	Hypoxia	EndoCap-a
GGGATGACAAGCTGAG_10X_Control_20181212	-14.2892	1.74637	Control	EndoCap-a
TACTTGTTCGTTGCCT_10X_Hypoxia_20180727	-13.8527	-0.635057	Hypoxia	EndoCap-a
CTCATTAAGGCTCAGA_10X_Control_20181213	-15.7871	0.423152	Control	EndoCap-a
ATCATGGGTTGGTTTG_10X_Hypoxia_20180727	-16.3412	-0.0283158	Hypoxia	EndoCap-a
GTCAAGTGTAGTAGTA_10X_Hypoxia_20180727	-15.2295	1.35189	Hypoxia	EndoCap-a
TCGAGGCGTAATCGTC_10X_Hypoxia_20180727	-14.7052	0.348414	Hypoxia	EndoCap-a
GGCGTGTCACGCCAGT_10X_Hypoxia_20180727	-13.4597	0.135562	Hypoxia	EndoCap-a
CCCAATCAGGTGCTTT_10X_Control_20181212	-16.3791	0.399978	Control	EndoCap-a
GTCACGGCACATCCGG_10X_Control_20181212	-14.2571	2.16601	Control	EndoCap-a
CATATGGTCAGCTGGC_10X_Hypoxia_20181213	-13.6408	-0.338537	Hypoxia	EndoCap-a
CGTTCTGAGCCCGAAA_10X_Control_20181212	-15.2071	0.0998875	Control	EndoCap-a
CCATGTCAGACAGACC_10X_Control_20181213	-15.5645	-0.317514	Control	EndoCap-a
TTCTCCTCAATGGATA_10X_Control_20181212	-13.3149	-0.638614	Control	EndoCap-a
ATGCGATCACCCTATC_10X_Hypoxia_20181213	-13.4763	-0.0297862	Hypoxia	EndoCap-a
CACACAACAATAACGA_10X_Hypoxia_20181213	-13.3139	0.524194	Hypoxia	EndoCap-a
TCTCTAAGTTTGACTG_10X_Control_20180727	-13.6655	0.849572	Control	EndoCap-a
GCTGCGAAGCTAGTCT_10X_Hypoxia_20181213	-13.3634	0.202236	Hypoxia	EndoCap-a
CGCGTTTGTCTTCTCG_10X_Control_20181213	-14.4912	1.24698	Control	EndoCap-a
TACGGGCTCGTGGGAA_10X_Hypoxia_20180727	-15.2467	0.258961	Hypoxia	EndoCap-a
CGACTTCAGTACATGA_10X_Control_20181213	-15.0556	1.66426	Control	EndoCap-a
CGTGTAACACTACAGT_10X_Hypoxia_20181213	-16.147	0.17472	Hypoxia	EndoCap-a
ATTACTCGTATATCCG_10X_Control_20180727	-14.6828	2.02217	Control	EndoCap-a
TCGAGGCCAGCCTTGG_10X_Control_20180727	-15.2056	1.19701	Control	EndoCap-a
ACGAGGACAATACGCT_10X_Control_20181212	-14.7861	0.687424	Control	EndoCap-a
CAGCTGGTCATGTCCC_10X_Control_20180727	-15.6913	1.8424	Control	EndoCap-a
ATGCGATTCGCCATAA_10X_Control_20181212	-13.5851	1.22874	Control	EndoCap-a
GACCTGGAGTGAAGAG_10X_Control_20180727	-15.2569	1.43177	Control	EndoCap-a
ACGGAGATCCGAAGAG_10X_Control_20181212	-15.7775	0.962301	Control	EndoCap-a
GCAAACTCACACATGT_10X_Hypoxia_20180727	-14.4479	0.246472	Hypoxia	EndoCap-a
CAACTAGTCACGATGT_10X_Control_20180727	-15.77	0.633505	Control	EndoCap-a
CACAGTAAGGAGTTTA_10X_Control_20181213	-15.3486	0.917161	Control	EndoCap-a
ATCTGCCCACCGTTGG_10X_Hypoxia_20180727	-14.4183	-0.513107	Hypoxia	EndoCap-a
GGATTACAGTCAAGGC_10X_Control_20180727	-14.5837	1.20581	Control	EndoCap-a
CCCAGTTCAAGCGATG_10X_Hypoxia_20180727	-14.297	0.195596	Hypoxia	EndoCap-a
CATCGAACACGCCAGT_10X_Control_20181213	-15.6717	0.897649	Control	EndoCap-a
GGCGACTGTATTCTCT_10X_Hypoxia_20180727	7.99348	-1.32386	Hypoxia	EndoCap-a
AAGCCGCTCGCGCCAA_10X_Control_20181212	-15.4662	2.09842	Control	EndoCap-a
CGCCAAGGTGTAACGG_10X_Control_20180727	-14.87	1.64428	Control	EndoCap-a
GAGTCCGTCGGTCTAA_10X_Control_20181213	-14.9392	0.788126	Control	EndoCap-a
GCAGTTACACAGTCGC_10X_Hypoxia_20180727	-14.6768	-0.231659	Hypoxia	EndoCap-a
AAAGCAAAGGCATGGT_10X_Control_20181213	-13.3715	1.98861	Control	EndoCap-a
CAACCAAAGTGACTCT_10X_Control_20181213	-15.545	1.31011	Control	EndoCap-a
CAGCGACAGAACAACT_10X_Hypoxia_20181212	-14.9827	0.814802	Hypoxia	EndoCap-a
GAATAAGGTCCTGCTT_10X_Hypoxia_20180727	-14.7222	-0.541861	Hypoxia	EndoCap-a
AGTGTCATCTGGGCCA_10X_Control_20181212	-14.5727	-0.839899	Control	EndoCap-a
AAAGCAAGTATTAGCC_10X_Control_20181212	-14.027	1.07253	Control	EndoCap-a
GGTGAAGTCACTATTC_10X_Hypoxia_20180727	-14.0032	-0.102087	Hypoxia	EndoCap-a
CGGACACCAATTGCTG_10X_Control_20180727	-13.8762	1.12153	Control	EndoCap-a
TCTATTGAGCTGCGAA_10X_Control_20181213	-13.4588	0.866931	Control	EndoCap-a
TAGTTGGGTCGCGTGT_10X_Control_20181212	7.92486	0.342603	Control	EndoCap-a
AGTAGTCTCAAGCCTA_10X_Hypoxia_20181213	-15.9974	1.04504	Hypoxia	EndoCap-a
ACTTTCAAGTACCGGA_10X_Hypoxia_20181212	-15.1793	0.0745732	Hypoxia	EndoCap-a
GGGATGAGTACTTAGC_10X_Hypoxia_20181212	-14.7496	-0.275912	Hypoxia	EndoCap-a
GTAACTGCACACGCTG_10X_Hypoxia_20180727	-14.9929	0.309504	Hypoxia	EndoCap-a
TCAACGAAGGATGCGT_10X_Hypoxia_20180727	-14.7339	-0.236215	Hypoxia	EndoCap-a
TGGGAAGCAATCGAAA_10X_Hypoxia_20180727	-13.2662	0.844671	Hypoxia	EndoCap-a
GCTCTGTAGAATCTCC_10X_Control_20181213	-15.9134	0.258232	Control	EndoCap-a
GAACATCCACTTAACG_10X_Hypoxia_20180727	-14.2601	0.611095	Hypoxia	EndoCap-a
CCGTACTAGACGCACA_10X_Hypoxia_20180727	-15.4085	1.69616	Hypoxia	EndoCap-a
CTCATTACAGTTTACG_10X_Hypoxia_20181213	-14.8442	-0.0763687	Hypoxia	EndoCap-a
ACGCAGCGTAAGTAGT_10X_Control_20181213	-14.1826	2.01454	Control	EndoCap-a
AGAATAGGTTGTACAC_10X_Control_20180727	-15.7339	0.120287	Control	EndoCap-a
CCAATCCTCTTCGGTC_10X_Control_20181213	-15.7014	1.53313	Control	EndoCap-a
CAGCGACGTCAACTGT_10X_Hypoxia_20181212	-14.6502	-0.86196	Hypoxia	EndoCap-a
CATCAGACATCCCATC_10X_Hypoxia_20181213	-14.0684	1.41092	Hypoxia	EndoCap-a
TCTCTAACATATGGTC_10X_Control_20181212	-15.4393	0.79777	Control	EndoCap-a
CGTCCATAGATGAGAG_10X_Hypoxia_20180727	-15.7775	-0.255949	Hypoxia	EndoCap-a
GTACTCCAGACGACGT_10X_Hypoxia_20180727	-14.4852	0.530477	Hypoxia	EndoCap-a
CACATTTGTGCGATAG_10X_Control_20180727	-14.9253	0.773142	Control	EndoCap-a
CCGTGGATCTAACTGG_10X_Control_20180727	-15.9733	1.19654	Control	EndoCap-a
GATCTAGGTAGAGTGC_10X_Hypoxia_20180727	-16.0204	0.44982	Hypoxia	EndoCap-a
TTAGTTCCATGTCGAT_10X_Control_20181213	-16.6293	1.12063	Control	EndoCap-a
ACAGCCGTCAAGGCTT_10X_Hypoxia_20181213	-13.3607	-0.0324696	Hypoxia	EndoCap-a
GATGAAACAGGGCATA_10X_Control_20181212	-14.8186	1.12258	Control	EndoCap-a
TCTATTGCATCGATTG_10X_Control_20181213	-15.0806	1.32053	Control	EndoCap-a
TGCCCATTCAACACCA_10X_Hypoxia_20181213	-14.6911	-1.23493	Hypoxia	EndoCap-a
ATAAGAGCACGCATCG_10X_Hypoxia_20180727	-14.8671	-0.954435	Hypoxia	EndoCap-a
CGGGTCATCCCAAGTA_10X_Control_20180727	-15.1111	0.461654	Control	EndoCap-a
CAGCCGACAGTCCTTC_10X_Hypoxia_20180727	-15.3468	-0.657957	Hypoxia	EndoCap-a
ATCCACCGTTCGCGAC_10X_Hypoxia_20180727	-14.9371	0.59666	Hypoxia	EndoCap-a
GACTGCGGTCGGCTCA_10X_Control_20181213	-15.6248	1.42084	Control	EndoCap-a
TGATTTCGTACCGTAT_10X_Hypoxia_20180727	-14.9814	-0.451039	Hypoxia	EndoCap-a
AGTAGTCGTAAATGTG_10X_Hypoxia_20181213	-13.5095	-0.203004	Hypoxia	EndoCap-a
TCAGGTAAGTCGTTTG_10X_Control_20180727	-16.1831	-0.258979	Control	EndoCap-a
TCCCGATCATTGCGGC_10X_Control_20180727	-15.7008	2.04059	Control	EndoCap-a
TGAGGGACACATAACC_10X_Control_20181213	-14.6142	1.16039	Control	EndoCap-a
AAAGCAATCTGTTTGT_10X_Hypoxia_20180727	-16.3468	-0.492226	Hypoxia	EndoCap-a
ATGAGGGCATCCTAGA_10X_Control_20180727	-14.7401	1.99996	Control	EndoCap-a
GGCGACTCAATGGATA_10X_Control_20181213	-16.0692	0.871477	Control	EndoCap-a
TGACTTTGTAGAGTGC_10X_Control_20180727	-13.6158	1.78149	Control	EndoCap-a
CATCAAGCATGTTGAC_10X_Control_20181212	-14.6422	1.86013	Control	EndoCap-a
TGAGCCGCACCGGAAA_10X_Control_20181213	-15.714	-0.510018	Control	EndoCap-a
AGGGTGAGTTGGTAAA_10X_Control_20180727	-14.5915	2.44589	Control	EndoCap-a
CGTTAGACAAAGCAAT_10X_Hypoxia_20180727	-13.1547	-0.216144	Hypoxia	EndoCap-a
CTCGTCACAGATAATG_10X_Hypoxia_20180727	-14.8516	-0.542996	Hypoxia	EndoCap-a
GGGTCTGGTCTGCGGT_10X_Control_20181212	-15.8625	1.10018	Control	EndoCap-a
GCGCAACCAAAGTGCG_10X_Hypoxia_20180727	-14.4539	0.0102756	Hypoxia	EndoCap-a
ACGTCAATCAGTGTTG_10X_Control_20180727	-15.0968	1.41827	Control	EndoCap-a
CTTCTCTAGCTCAACT_10X_Control_20181212	3.61845	2.40939	Control	EndoCap-a
TATCTCAAGAGTAAGG_10X_Hypoxia_20181213	-15.3896	-0.0899727	Hypoxia	EndoCap-a
TGAGAGGGTCACTTCC_10X_Control_20181213	-15.359	0.387338	Control	EndoCap-a
AGCGGTCTCTTTCCTC_10X_Control_20180727	-15.1828	1.39969	Control	EndoCap-a
CACCAGGGTAGAAAGG_10X_Control_20180727	-13.9769	2.06744	Control	EndoCap-a
AAGTCTGAGGAGTAGA_10X_Control_20181212	-12.7372	1.00047	Control	EndoCap-a
TTCTCAATCTCCAGGG_10X_Control_20181212	-16.4037	1.24998	Control	EndoCap-a
TCAGATGTCATCACCC_10X_Hypoxia_20181212	-14.7693	0.864488	Hypoxia	EndoCap-a
TGCGTGGCATCCAACA_10X_Control_20181213	-14.9899	1.91603	Control	EndoCap-a
TCACAAGCAATGGAGC_10X_Hypoxia_20181213	-15.1042	1.44598	Hypoxia	EndoCap-a
TGGTTCCAGTTATCGC_10X_Hypoxia_20180727	-14.9208	-1.13771	Hypoxia	EndoCap-a
CGGAGTCTCGGTGTTA_10X_Hypoxia_20180727	-14.4005	-0.391918	Hypoxia	EndoCap-a
CGGACGTTCAAACCGT_10X_Control_20181212	-14.7824	0.830514	Control	EndoCap-a
CGGACTGAGAGTACCG_10X_Control_20180727	-15.8418	0.946931	Control	EndoCap-a
TTCTACACACATGGGA_10X_Hypoxia_20180727	-14.989	0.571622	Hypoxia	EndoCap-a
GTACTCCTCTCTGTCG_10X_Hypoxia_20181213	-14.3739	0.340476	Hypoxia	EndoCap-a
CCGTTCAAGAGAACAG_10X_Hypoxia_20181213	-13.9506	-0.455711	Hypoxia	EndoCap-a
ACTGATGCAGACTCGC_10X_Hypoxia_20180727	-15.7639	1.78834	Hypoxia	EndoCap-a
TATTACCGTATATGGA_10X_Control_20180727	-15.2603	2.32436	Control	EndoCap-a
TCAGATGGTAAGAGAG_10X_Control_20181212	-14.6719	1.56561	Control	EndoCap-a
CTGGTCTTCGTTACAG_10X_Control_20180727	-15.36	1.0606	Control	EndoCap-a
AAGTCTGTCATAGCAC_10X_Control_20180727	-14.6375	2.62393	Control	EndoCap-a
ATCATCTCAATCTACG_10X_Hypoxia_20181213	-13.2568	2.00218	Hypoxia	EndoCap-a
CTTCTCTCATGATCCA_10X_Control_20181212	-16.1858	0.0151688	Control	EndoCap-a
GGGACCTGTCGGGTCT_10X_Hypoxia_20181213	-15.8968	1.41874	Hypoxia	EndoCap-a
GGACATTGTAGTGAAT_10X_Hypoxia_20180727	-14.8219	-0.15934	Hypoxia	EndoCap-a
CGTCACTCAGGAACGT_10X_Control_20180727	-13.4845	1.64883	Control	EndoCap-a
CTTCTCTCATACTACG_10X_Hypoxia_20180727	-14.06	0.251601	Hypoxia	EndoCap-a
ATTATCCGTGTGCGTC_10X_Hypoxia_20180727	-15.5574	0.197038	Hypoxia	EndoCap-a
GGCTGGTCACTCTGTC_10X_Control_20180727	-13.6106	1.14034	Control	EndoCap-a
GTGCATATCCGCGCAA_10X_Hypoxia_20180727	-15.0054	0.647952	Hypoxia	EndoCap-a
TTATGCTAGAGCAATT_10X_Control_20181213	-12.8932	2.02448	Control	EndoCap-a
ACGGGCTGTACCGAGA_10X_Control_20181213	-13.5366	1.016	Control	EndoCap-a
GGCAATTGTCAGGACA_10X_Control_20181212	-14.6829	1.08503	Control	EndoCap-a
GGTGAAGTCACAAACC_10X_Control_20181213	-13.5213	0.72421	Control	EndoCap-a
TCCCGATAGGCATTGG_10X_Control_20180727	3.99013	-0.279728	Control	EndoCap-a
GTCATTTGTCTTGATG_10X_Hypoxia_20181213	-15.0712	0.555542	Hypoxia	EndoCap-a
GGATGTTTCAACACGT_10X_Control_20180727	-15.5098	0.719733	Control	EndoCap-a
ACACCGGTCAGATAAG_10X_Control_20180727	-14.7431	-0.865612	Control	EndoCap-a
TAAGAGAAGAGGTACC_10X_Control_20180727	-15.9483	0.833423	Control	EndoCap-a
GTCCTCATCAGCGATT_10X_Hypoxia_20181213	8.15779	-1.26512	Hypoxia	EndoCap-a
ATAAGAGTCTTGCAAG_10X_Hypoxia_20180727	8.51696	-0.666809	Hypoxia	EndoCap-a
CCTATTACATCGACGC_10X_Control_20181212	-16.2626	0.220414	Control	EndoCap-a
AAAGCAACAGATAATG_10X_Hypoxia_20181212	-14.4191	0.182818	Hypoxia	EndoCap-a
GAATGAAGTAGCGTAG_10X_Hypoxia_20180727	-15.646	0.623917	Hypoxia	EndoCap-a
TGACTAGTCCCTCAGT_10X_Hypoxia_20180727	-13.7266	-0.370343	Hypoxia	EndoCap-a
AAATGCCAGCTCAACT_10X_Control_20180727	-14.9906	2.09439	Control	EndoCap-a
TGTGTTTGTTGGTTTG_10X_Hypoxia_20180727	-15.8741	-0.710839	Hypoxia	EndoCap-a
AGACGTTCAGCCTTTC_10X_Control_20180727	-13.6934	1.0908	Control	EndoCap-a
AAAGCAAGTGTGTGCC_10X_Control_20181213	-14.2178	1.77353	Control	EndoCap-a
CACACTCTCTTGTCAT_10X_Hypoxia_20181212	-14.8081	0.629717	Hypoxia	EndoCap-a
ATGCGATAGGGTCTCC_10X_Control_20180727	-13.8488	0.689796	Control	EndoCap-a
GACTAACGTGTTTGGT_10X_Hypoxia_20180727	-13.7069	0.159224	Hypoxia	EndoCap-a
TGTGGTACAGGGATTG_10X_Control_20181212	-13.037	1.13988	Control	EndoCap-a
CCCTCCTCAATAACGA_10X_Hypoxia_20180727	-13.5051	1.41019	Hypoxia	EndoCap-a
TGAGGGACAAGACGTG_10X_Control_20180727	2.13345	6.09033	Control	EndoCap-a
GAACATCTCTTCCTTC_10X_Control_20180727	-15.7258	-0.797089	Control	EndoCap-a
GTTCGGGCATCACAAC_10X_Hypoxia_20181213	6.81698	1.47453	Hypoxia	EndoCap-a
TGCACCTAGGTGGGTT_10X_Hypoxia_20181213	-16.3185	0.658309	Hypoxia	EndoCap-a
CAACTAGAGATGGCGT_10X_Hypoxia_20181212	-14.6518	0.284931	Hypoxia	EndoCap-a
CGTCTACGTGGTCTCG_10X_Hypoxia_20181213	3.31892	8.91517	Hypoxia	EndoCap-a
CAAGATCCATGTCTCC_10X_Hypoxia_20181213	-14.4855	0.758851	Hypoxia	EndoCap-a
ATCGAGTTCCAAAGTC_10X_Control_20181212	-14.6055	-0.0291001	Control	EndoCap-a
GCCTCTACACAGATTC_10X_Hypoxia_20180727	-14.9344	1.3213	Hypoxia	EndoCap-a
CGTCCATGTCCTCCAT_10X_Control_20181212	4.33986	2.04259	Control	EndoCap-a
GCAAACTCACTACAGT_10X_Hypoxia_20180727	-13.0156	-0.2367	Hypoxia	EndoCap-a
GAAATGAAGCAGCCTC_10X_Control_20180727	-15.1263	0.82261	Control	EndoCap-a
CCGGTAGGTTTGGGCC_10X_Hypoxia_20181212	-15.7338	-0.740813	Hypoxia	EndoCap-a
ACGATGTAGGTGCTAG_10X_Hypoxia_20181213	-14.864	-0.139046	Hypoxia	EndoCap-a
AAAGTAGCACGCTTTC_10X_Hypoxia_20181213	-14.7179	-1.10545	Hypoxia	EndoCap-a
TCGTAGACAAGGTTCT_10X_Control_20181212	-13.5302	1.61532	Control	EndoCap-a
GCAAACTTCTTATCTG_10X_Control_20181213	5.57277	1.33531	Control	EndoCap-a
CGTGTCTCATCTATGG_10X_Control_20180727	-15.5456	-0.34793	Control	EndoCap-a
TACCTTAAGTGGTAAT_10X_Control_20181212	7.86395	1.80017	Control	EndoCap-a
TAAGTGCCATACTCTT_10X_Control_20180727	-12.9506	1.75915	Control	EndoCap-a
GTATCTTCAAGCTGAG_10X_Control_20180727	-13.28	0.784223	Control	EndoCap-a
AGGTCCGAGAGCAATT_10X_Hypoxia_20180727	3.73614	4.89447	Hypoxia	EndoCap-a
AGAGTGGTCTTACCTA_10X_Hypoxia_20180727	-14.4218	1.18094	Hypoxia	EndoCap-a
ACAGCCGAGCGCCTCA_10X_Control_20181213	-13.9033	1.44691	Control	EndoCap-a
TCGGGACCATATGAGA_10X_Hypoxia_20181213	3.53454	2.86592	Hypoxia	EndoCap-a
CTCATTACAACACCTA_10X_Control_20180727	-13.6453	1.61385	Control	EndoCap-a
GGGAATGGTGAGTGAC_10X_Control_20180727	-13.5016	-0.254612	Control	EndoCap-a
CACATTTTCGCTAGCG_10X_Control_20181213	-13.8517	1.04766	Control	EndoCap-a
ACCGTAAGTGTGGTTT_10X_Control_20181213	-14.1869	1.5657	Control	EndoCap-a
TACACGACAACACCTA_10X_Hypoxia_20181213	7.26754	8.25987	Hypoxia	EndoCap-g
GTCACAAGTCCGAACC_10X_Hypoxia_20180727	4.91524	7.33495	Hypoxia	EndoCap-g
GCTGCTTTCACCGGGT_10X_Hypoxia_20181213	7.64475	3.04129	Hypoxia	EndoCap-g
GATCGTATCTTCGGTC_10X_Hypoxia_20180727	8.25596	7.74771	Hypoxia	EndoCap-g
CAAGAAACATGCGCAC_10X_Hypoxia_20181213	9.08275	6.95237	Hypoxia	EndoCap-g
GCCTCTAGTGATAAAC_10X_Hypoxia_20180727	8.57737	6.31637	Hypoxia	EndoCap-g
CCGTTCAGTGTCTGAT_10X_Hypoxia_20180727	4.7297	0.603552	Hypoxia	EndoCap-g
ATCATCTTCCTTAATC_10X_Hypoxia_20181212	7.6695	7.62185	Hypoxia	EndoCap-g
CTCTAATAGTCCGTAT_10X_Hypoxia_20181213	8.15218	7.11239	Hypoxia	EndoCap-g
CTTTGCGCACTTACGA_10X_Hypoxia_20181212	8.98975	6.57985	Hypoxia	EndoCap-g
GTCAAGTCACATCCAA_10X_Hypoxia_20181213	7.25975	6.88378	Hypoxia	EndoCap-g
TCAGGTATCCCAAGAT_10X_Hypoxia_20180727	7.88295	7.9867	Hypoxia	EndoCap-g
TTGGAACGTCGGATCC_10X_Hypoxia_20181213	8.59129	7.23787	Hypoxia	EndoCap-g
GGAGCAAGTATATGAG_10X_Hypoxia_20180727	9.00133	5.71693	Hypoxia	EndoCap-g
GCTGGGTGTGAACCTT_10X_Hypoxia_20181212	1.71601	2.40059	Hypoxia	EndoCap-g
AGACGTTGTGAGGGAG_10X_Hypoxia_20180727	4.00133	8.26634	Hypoxia	EndoCap-g
AGTTGGTGTTAAAGTG_10X_Hypoxia_20181213	8.82855	6.82174	Hypoxia	EndoCap-g
TATCTCACACGTCAGC_10X_Hypoxia_20180727	7.77692	7.01975	Hypoxia	EndoCap-g
GAGGTGAAGGAGCGAG_10X_Hypoxia_20181213	8.75625	3.79783	Hypoxia	EndoCap-g
TGATTTCCACATGACT_10X_Hypoxia_20181212	4.833	1.37269	Hypoxia	EndoCap-g
GGAAAGCCACATGTGT_10X_Hypoxia_20181213	7.39256	8.20684	Hypoxia	EndoCap-g
CGTCTACGTGAGGGTT_10X_Hypoxia_20180727	6.58705	7.69179	Hypoxia	EndoCap-g
CCTTCGATCACCATAG_10X_Hypoxia_20181212	8.27809	4.52281	Hypoxia	EndoCap-g
CGGACGTCATGCTAGT_10X_Hypoxia_20180727	8.02141	4.73975	Hypoxia	EndoCap-g
AGTGAGGAGCCAGTTT_10X_Hypoxia_20181213	7.54617	7.03018	Hypoxia	EndoCap-g
GAATGAACACATAACC_10X_Hypoxia_20180727	7.51	2.29175	Hypoxia	EndoCap-g
CAGAATCCAGATTGCT_10X_Hypoxia_20180727	9.14538	2.60352	Hypoxia	EndoCap-g
TCACAAGTCTGCGACG_10X_Hypoxia_20180727	7.59112	8.07831	Hypoxia	EndoCap-g
GACCTGGGTCGCGGTT_10X_Hypoxia_20180727	7.06192	8.47883	Hypoxia	EndoCap-g
CGAGCCAAGCGCTTAT_10X_Hypoxia_20181213	7.97864	6.41417	Hypoxia	EndoCap-g
GTATCTTCACGAAGCA_10X_Hypoxia_20181212	6.96671	7.12532	Hypoxia	EndoCap-g
GTCGTAACATCCTAGA_10X_Hypoxia_20181212	9.06689	6.03867	Hypoxia	EndoCap-g
TGAGCCGTCGGAGGTA_10X_Hypoxia_20180727	8.91754	6.93701	Hypoxia	EndoCap-g
AGACGTTTCTAACTCT_10X_Hypoxia_20181213	8.86017	6.54323	Hypoxia	EndoCap-g
TTGCGTCCAAAGGAAG_10X_Hypoxia_20181213	8.46505	7.4275	Hypoxia	EndoCap-g
GCTCTGTAGGCATGGT_10X_Hypoxia_20181213	8.08453	4.77897	Hypoxia	EndoCap-g
GACTGCGAGAAACGAG_10X_Hypoxia_20181212	7.79926	4.2919	Hypoxia	EndoCap-g
TCGCGAGGTCGCTTCT_10X_Hypoxia_20181212	9.65115	5.75949	Hypoxia	EndoCap-g
GTTAAGCTCATGCAAC_10X_Hypoxia_20180727	5.82687	7.88238	Hypoxia	EndoCap-g
AACCGCGTCTTGTACT_10X_Hypoxia_20180727	7.05375	7.27705	Hypoxia	EndoCap-g
CAGCTGGAGCTGGAAC_10X_Hypoxia_20181213	8.06214	8.08562	Hypoxia	EndoCap-g
GTACGTAAGAAACGAG_10X_Hypoxia_20181212	2.89705	0.0260947	Hypoxia	EndoCap-g
TCGTAGAAGGGAAACA_10X_Hypoxia_20181212	10.1765	4.78594	Hypoxia	EndoCap-g
ACAGCTAGTAGATTAG_10X_Hypoxia_20181212	4.03964	8.33126	Hypoxia	EndoCap-g
CTAGAGTTCAGTCCCT_10X_Hypoxia_20181213	8.05528	8.12368	Hypoxia	EndoCap-g
GCGCAACTCTTCCTTC_10X_Hypoxia_20181213	7.79271	5.97403	Hypoxia	EndoCap-g
AGCCTAACAACACGCC_10X_Hypoxia_20181213	7.1538	8.52397	Hypoxia	EndoCap-g
TGGCTGGTCAACGCTA_10X_Hypoxia_20181212	7.86186	5.58845	Hypoxia	EndoCap-g
TGAAAGACACATGTGT_10X_Hypoxia_20181213	7.80593	6.33507	Hypoxia	EndoCap-g
GGGTTGCAGACAGGCT_10X_Hypoxia_20181212	8.54641	7.56346	Hypoxia	EndoCap-g
CGCTGGAGTCTAGGTT_10X_Hypoxia_20181212	8.37103	6.83391	Hypoxia	EndoCap-g
CTCATTAAGAAGGTGA_10X_Hypoxia_20181213	7.76389	7.30799	Hypoxia	EndoCap-g
ACGATACGTAACGTTC_10X_Hypoxia_20181213	7.82352	6.54597	Hypoxia	EndoCap-g
CACACTCTCGGCCGAT_10X_Hypoxia_20180727	8.79485	7.46848	Hypoxia	EndoCap-g
CGACTTCGTTGTACAC_10X_Hypoxia_20181212	4.47468	8.27502	Hypoxia	EndoCap-g
GGTGAAGAGGCATGGT_10X_Hypoxia_20181213	10.0228	1.6276	Hypoxia	EndoCap-g
CTGCCTAGTTTAAGCC_10X_Hypoxia_20181212	4.13691	8.80201	Hypoxia	EndoCap-g
AGAGCGATCGTAGGTT_10X_Hypoxia_20181213	5.20857	6.87188	Hypoxia	EndoCap-g
TGAGGGATCTAACCGA_10X_Hypoxia_20181212	8.56681	7.10244	Hypoxia	EndoCap-g
AGCGGTCCATCGGACC_10X_Hypoxia_20180727	8.12177	5.55784	Hypoxia	EndoCap-g
ATTGGACTCACGATGT_10X_Hypoxia_20181213	7.79744	5.18147	Hypoxia	EndoCap-g
TTGCGTCGTTCGGGCT_10X_Hypoxia_20180727	8.55405	6.67656	Hypoxia	EndoCap-g
TCACGAAGTCCAGTAT_10X_Hypoxia_20181213	8.72313	6.06463	Hypoxia	EndoCap-g
CTTAGGACAGACGCCT_10X_Hypoxia_20181213	7.14421	7.2556	Hypoxia	EndoCap-g
ACATGGTTCAGTTGAC_10X_Hypoxia_20181212	6.96005	8.23982	Hypoxia	EndoCap-g
AAGGAGCAGGCAGTCA_10X_Hypoxia_20181213	7.51508	8.38142	Hypoxia	EndoCap-g
GACGCGTTCCGTACAA_10X_Hypoxia_20180727	7.55088	2.4511	Hypoxia	EndoCap-g
CCTTCCCGTTGCTCCT_10X_Hypoxia_20180727	7.99403	6.81715	Hypoxia	EndoCap-g
GGACGTCCACTCGACG_10X_Hypoxia_20181213	8.61856	5.46324	Hypoxia	EndoCap-g
ATCCGAACAACACGCC_10X_Hypoxia_20181213	7.36713	7.24549	Hypoxia	EndoCap-g
TACTCATAGCTCAACT_10X_Hypoxia_20181213	8.48027	6.64343	Hypoxia	EndoCap-g
GGGATGAGTTCCCGAG_10X_Hypoxia_20180727	8.11544	6.01501	Hypoxia	EndoCap-g
GTGCAGCCAAGGACAC_10X_Hypoxia_20181213	6.36592	7.42679	Hypoxia	EndoCap-g
TCAATCTGTTGCGTTA_10X_Hypoxia_20180727	8.01778	4.87755	Hypoxia	EndoCap-g
TACTTACTCACCATAG_10X_Hypoxia_20181213	9.12992	6.28376	Hypoxia	EndoCap-g
AAAGCAACAGCTATTG_10X_Hypoxia_20181213	7.41704	7.94368	Hypoxia	EndoCap-g
TGCCCTAGTGTAAGTA_10X_Hypoxia_20181213	9.16449	4.88915	Hypoxia	EndoCap-g
CTCGGGATCTGGTGTA_10X_Hypoxia_20181213	6.78681	6.99328	Hypoxia	EndoCap-g
GGCCGATCAAGTCTAC_10X_Hypoxia_20181212	5.09777	8.20227	Hypoxia	EndoCap-g
CAGAATCAGAACAACT_10X_Hypoxia_20181213	8.46618	6.12649	Hypoxia	EndoCap-g
GCATGTAGTAGGGTAC_10X_Hypoxia_20181213	6.79291	8.22783	Hypoxia	EndoCap-g
TGTTCCGGTGCACGAA_10X_Hypoxia_20180727	5.83752	7.23304	Hypoxia	EndoCap-g
GCAGTTACATAGTAAG_10X_Hypoxia_20181213	6.17338	8.35788	Hypoxia	EndoCap-g
TAAGAGACAAGGTTTC_10X_Hypoxia_20181213	8.53957	4.24642	Hypoxia	EndoCap-g
TGCCCATGTAGGCATG_10X_Hypoxia_20181213	9.92732	4.80018	Hypoxia	EndoCap-g
AGACGTTCATGCATGT_10X_Hypoxia_20180727	6.63397	7.33096	Hypoxia	EndoCap-g
AGCCTAATCTAACTCT_10X_Hypoxia_20181212	7.47876	8.20157	Hypoxia	EndoCap-g
GGGAGATGTACACCGC_10X_Hypoxia_20181213	4.6537	7.80424	Hypoxia	EndoCap-g
CGATCGGTCGGCATCG_10X_Hypoxia_20180727	8.56086	6.3675	Hypoxia	EndoCap-g
ACACCCTCATCAGTAC_10X_Hypoxia_20180727	8.46209	7.84836	Hypoxia	EndoCap-g
CGTGTAAGTAAGAGGA_10X_Hypoxia_20181212	8.35318	6.79828	Hypoxia	EndoCap-g
GATTCAGGTATGAAAC_10X_Hypoxia_20180727	8.41715	7.41215	Hypoxia	EndoCap-g
GGGTTGCAGTTACGGG_10X_Hypoxia_20181212	7.6065	3.26947	Hypoxia	EndoCap-g
AGCGGTCGTACTCAAC_10X_Hypoxia_20180727	4.49246	8.33271	Hypoxia	EndoCap-g
CACAGTAAGTACATGA_10X_Hypoxia_20180727	7.25323	8.51866	Hypoxia	EndoCap-g
CGTTAGATCAGCATGT_10X_Hypoxia_20181213	9.96134	4.02836	Hypoxia	EndoCap-g
GCGCGATGTTTCGCTC_10X_Hypoxia_20180727	8.5905	6.64076	Hypoxia	EndoCap-g
ATCTGCCAGGTGTGGT_10X_Hypoxia_20181212	10.2072	4.42345	Hypoxia	EndoCap-g
GATCGCGCAGTTCATG_10X_Hypoxia_20181213	8.11476	8.23026	Hypoxia	EndoCap-g
CACACAACAGGGATTG_10X_Hypoxia_20180727	2.25913	2.4966	Hypoxia	EndoCap-g
GACCAATAGGTGCTTT_10X_Control_20180727	6.55555	-0.820629	Control	EndoCap-g
CTGATCCGTAGCAAAT_10X_Hypoxia_20181213	8.18267	7.38084	Hypoxia	EndoCap-g
CTCGTCACAAGAGTCG_10X_Hypoxia_20181213	8.86692	7.05252	Hypoxia	EndoCap-g
ACAGCTAGTTTGGCGC_10X_Hypoxia_20180727	8.21288	6.32088	Hypoxia	EndoCap-g
CAAGGCCGTGTTCGAT_10X_Hypoxia_20180727	7.99592	8.37518	Hypoxia	EndoCap-g
CTGGTCTCAGTAACGG_10X_Hypoxia_20181213	6.72698	8.82417	Hypoxia	EndoCap-g
AATCCAGAGCTGGAAC_10X_Hypoxia_20180727	7.62052	3.77054	Hypoxia	EndoCap-g
TCCCGATGTTTCGCTC_10X_Hypoxia_20181213	10.2047	4.52287	Hypoxia	EndoCap-g
CCGTTCACATTCACTT_10X_Hypoxia_20181212	4.87502	7.23094	Hypoxia	EndoCap-g
TCAGGATTCAATCTCT_10X_Hypoxia_20180727	6.90448	8.05466	Hypoxia	EndoCap-g
ACTTTCATCTGTACGA_10X_Hypoxia_20180727	8.47628	5.26021	Hypoxia	EndoCap-g
CGACTTCCATTGTGCA_10X_Hypoxia_20181213	5.29656	7.53181	Hypoxia	EndoCap-g
TCACAAGAGTCAAGGC_10X_Hypoxia_20181212	8.32145	7.33603	Hypoxia	EndoCap-g
CTTAGGAAGCGATATA_10X_Hypoxia_20180727	4.68721	7.51523	Hypoxia	EndoCap-g
TAAGCGTCACCACGTG_10X_Hypoxia_20181213	8.19848	8.32669	Hypoxia	EndoCap-g
TAAGCGTAGACGCTTT_10X_Hypoxia_20181212	5.38886	7.77279	Hypoxia	EndoCap-g
CCTTACGGTCTCAACA_10X_Hypoxia_20181212	7.89733	7.14203	Hypoxia	EndoCap-g
CGGAGTCCATATGGTC_10X_Hypoxia_20181213	7.54289	7.4244	Hypoxia	EndoCap-g
ACGGGTCTCGGCCGAT_10X_Hypoxia_20181213	6.37175	7.81572	Hypoxia	EndoCap-g
AGATCTGTCATATCGG_10X_Hypoxia_20181213	7.84518	7.32735	Hypoxia	EndoCap-g
GCGCCAATCTTACCTA_10X_Hypoxia_20181212	2.2959	1.98645	Hypoxia	EndoCap-g
GTGCGGTTCCACGCAG_10X_Hypoxia_20181213	7.24504	7.09707	Hypoxia	EndoCap-g
GTAACTGTCGGAGGTA_10X_Hypoxia_20181213	8.10878	8.30591	Hypoxia	EndoCap-g
GCGCCAAGTCCTCCAT_10X_Hypoxia_20181212	5.9957	8.16572	Hypoxia	EndoCap-g
TCAGGATGTCATCCCT_10X_Hypoxia_20181213	7.92339	7.08351	Hypoxia	EndoCap-g
GGTGTTATCCTCATTA_10X_Hypoxia_20181213	9.15908	6.26656	Hypoxia	EndoCap-g
ACCGTAACAAACCTAC_10X_Hypoxia_20180727	8.75956	5.48272	Hypoxia	EndoCap-g
CCATTCGCATATACCG_10X_Hypoxia_20180727	7.29368	8.68343	Hypoxia	EndoCap-g
GGCCGATTCATCTGTT_10X_Hypoxia_20181212	7.99555	6.43728	Hypoxia	EndoCap-g
CATATTCTCTGCTGCT_10X_Hypoxia_20181212	6.40284	6.98614	Hypoxia	EndoCap-g
TACTTGTGTTCGGCAC_10X_Hypoxia_20181213	7.61788	7.98787	Hypoxia	EndoCap-g
ACCAGTATCCGTTGCT_10X_Hypoxia_20180727	8.36466	6.17053	Hypoxia	EndoCap-g
TTAGGACGTAAATGTG_10X_Hypoxia_20180727	7.38181	8.13356	Hypoxia	EndoCap-g
CAGAATCAGTCGTACT_10X_Hypoxia_20181213	8.37516	7.39094	Hypoxia	EndoCap-g
TGTTCCGAGCAGACTG_10X_Hypoxia_20181212	8.56083	6.30065	Hypoxia	EndoCap-g
TGGCGCAGTGAGTATA_10X_Hypoxia_20181212	6.96899	6.54678	Hypoxia	EndoCap-g
GCATGCGCATCGACGC_10X_Hypoxia_20181212	9.07343	4.23253	Hypoxia	EndoCap-g
TCGAGGCGTTTAGCTG_10X_Hypoxia_20180727	6.56515	1.59452	Hypoxia	EndoCap-g
TGAAAGACAGGTCGTC_10X_Hypoxia_20180727	8.30614	6.65628	Hypoxia	EndoCap-g
CTGATAGGTCCAGTTA_10X_Hypoxia_20181213	9.06627	7.07331	Hypoxia	EndoCap-g
TAGTTGGGTCATGCAT_10X_Hypoxia_20181213	8.98813	7.49756	Hypoxia	EndoCap-g
TGTGTTTTCCAAACTG_10X_Hypoxia_20180727	7.52536	7.38441	Hypoxia	EndoCap-g
CGGACTGAGCTCCTCT_10X_Hypoxia_20180727	1.71862	2.68517	Hypoxia	EndoCap-g
TACCTTATCTTGGGTA_10X_Hypoxia_20180727	8.93323	4.82055	Hypoxia	EndoCap-g
GGGATGACAATAAGCA_10X_Hypoxia_20181213	6.56114	8.47375	Hypoxia	EndoCap-g
GTGTTAGCAGGACGTA_10X_Hypoxia_20181212	7.11628	6.66319	Hypoxia	EndoCap-g
ACTGATGGTCCATCCT_10X_Hypoxia_20181213	5.95238	8.25077	Hypoxia	EndoCap-g
GGGCATCTCAGCTCGG_10X_Hypoxia_20181213	7.31948	6.96058	Hypoxia	EndoCap-g
ACCTTTACAGCTGGCT_10X_Hypoxia_20181212	8.2103	7.3877	Hypoxia	EndoCap-g
CATTATCAGGGATCTG_10X_Hypoxia_20181213	6.32726	7.862	Hypoxia	EndoCap-g
CGTTAGACACCGAAAG_10X_Hypoxia_20180727	6.64235	6.9968	Hypoxia	EndoCap-g
AGAGCGAAGGCTAGCA_10X_Hypoxia_20181213	7.27173	4.80481	Hypoxia	EndoCap-g
GAATGAATCAAACGGG_10X_Control_20180727	5.3756	5.30192	Control	EndoCap-g
ATCATGGCATGAAGTA_10X_Hypoxia_20181213	2.82119	4.7726	Hypoxia	EndoCap-g
GACTGCGGTAAACCTC_10X_Hypoxia_20181213	7.54489	7.09632	Hypoxia	EndoCap-g
GCTGGGTCAAGACGTG_10X_Hypoxia_20181213	8.22743	7.92425	Hypoxia	EndoCap-g
ATAAGAGTCGTCCGTT_10X_Hypoxia_20181212	8.47413	6.0629	Hypoxia	EndoCap-g
TGTGTTTTCAAGCCTA_10X_Control_20181212	5.59259	0.7105	Control	EndoCap-g
TCAGCAAAGCCAGTTT_10X_Hypoxia_20181212	8.37832	7.90699	Hypoxia	EndoCap-g
TAGTGGTTCCTATGTT_10X_Hypoxia_20180727	7.69149	7.35042	Hypoxia	EndoCap-g
CCGTGGACAATACGCT_10X_Hypoxia_20181213	7.23124	8.3579	Hypoxia	EndoCap-g
GGACATTGTTCGTCTC_10X_Hypoxia_20181213	8.88262	5.95527	Hypoxia	EndoCap-g
TCACGAAAGTGGTCCC_10X_Hypoxia_20180727	4.3151	0.559139	Hypoxia	EndoCap-g
TTGGAACGTCAAAGAT_10X_Hypoxia_20180727	8.92834	5.73925	Hypoxia	EndoCap-g
CTGCCTAAGCACGCCT_10X_Hypoxia_20180727	7.33661	8.21682	Hypoxia	EndoCap-g
TTGGCAAAGGCGACAT_10X_Hypoxia_20181213	7.28138	7.58148	Hypoxia	EndoCap-g
CATGCCTGTGTTCGAT_10X_Hypoxia_20181213	8.05856	7.27826	Hypoxia	EndoCap-g
ACGCCGAGTCCATCCT_10X_Hypoxia_20181212	5.85663	-1.99816	Hypoxia	EndoCap-g
TACGGGCAGCCGGTAA_10X_Hypoxia_20181212	8.6385	7.50004	Hypoxia	EndoCap-g
TGCTACCCAACTGGCC_10X_Hypoxia_20180727	7.17206	7.44731	Hypoxia	EndoCap-g
CAAGGCCCAGTTCCCT_10X_Hypoxia_20180727	4.31062	0.233558	Hypoxia	EndoCap-g
CTTCTCTGTAGTACCT_10X_Hypoxia_20180727	7.14826	7.46574	Hypoxia	EndoCap-g
AAACCTGTCAGCGACC_10X_Hypoxia_20180727	7.94568	6.17115	Hypoxia	EndoCap-g
CTCATTATCCGAACGC_10X_Hypoxia_20181213	8.7207	6.35608	Hypoxia	EndoCap-g
CCAGCGATCCCGACTT_10X_Hypoxia_20180727	8.02697	3.37392	Hypoxia	EndoCap-g
AGAGCTTCATAGACTC_10X_Hypoxia_20181213	6.37329	8.42511	Hypoxia	EndoCap-g
[truncated: 8,171 more rows]
