# Supplementary material for: Short-term exposure to intermittent hypoxia leads to changes in gene expression seen in chronic pulmonary disease
Source: eLife journal article supplement (doi:10.7554/elife.63003), 2021-02-18
Supplement: supp [file Figure6-figureSupplement5.xlsx]

## Sheet: TF_MyoFB
TF	symbol	class	AVG.rank
ENSMUSG00000020473	Aebp1	shared	1.5
ENSMUSG00000028565	Nfia	shared	2
ENSMUSG00000069378	Prdm6	shared	4
ENSMUSG00000021379	Id4	shared	4.5
ENSMUSG00000038872	Zfhx3	shared	5.5
ENSMUSG00000032744	Heyl	shared	6.5
ENSMUSG00000030551	Nr2f2	shared	7
ENSMUSG00000052534	Pbx1	shared	7.5
ENSMUSG00000022708	Zbtb20	shared	9
ENSMUSG00000059824	Dbp	hypoxia_specific	11
ENSMUSG00000028949	Smarcd3	shared	11.5
ENSMUSG00000033863	Klf9	shared	12
ENSMUSG00000003949	Hlf	hypoxia_specific	15
ENSMUSG00000022010	Tsc22d1	shared	15
ENSMUSG00000048387	Osr1	shared	15
ENSMUSG00000001911	Nfix	shared	15.5
ENSMUSG00000026586	Prrx1	shared	16
ENSMUSG00000018263	Tbx5	shared	19.5
ENSMUSG00000050295	Foxc1	shared	20.5
ENSMUSG00000020889	Nr1d1	shared	24
ENSMUSG00000053007	Creb5	shared	24
ENSMUSG00000055148	Klf2	shared	24.5
ENSMUSG00000032238	Rora	shared	25
ENSMUSG00000040433	Zbtb38	shared	32.5
ENSMUSG00000071076	Jund	shared	32.5
