# Supplementary material for: Short-term exposure to intermittent hypoxia leads to changes in gene expression seen in chronic pulmonary disease
Source: eLife. 2021 Feb 18;10:e63003. doi: 10.7554/eLife.63003 (PMC7909952; doi:10.7554/eLife.63003)
Supplement: Supplementary file 2. — (a) The alignment statistics of scRNA-seq data for IH exposure and control mice. (b) The marker genes list for 25 clusters from AltAnalyze analysis of scRNA-seq data from IH exposure mice. (c) The annotated cell types for 25 cellHarmony aligned clusters of scRNA-seq data from IH exposure and control mice. (d) Top 200 up- and downregulated genes in 19 detected lung cell types under IH exposure from the scRNA-seq data. (e) DAVID-enriched biological processes and merged categories using top 200 differential expression genes in each lung cell type under IH exposure. [file elife-63003-supp2.xlsx]

## Sheet: a_MappingStatistics
Sample	TotalReads	Estimated number of cells	Mean reads per cell	Median genes per cell	Median UMI counts per cell
Ctrl1	335956277	5474	61373	1488	3476
Ctrl2	269705779	5011	53822	1418	3211
Ctrl3	294242078	5641	52161	1107	2451
Hypo1	307302167	4310	71299	1442	3130
Hypo2	291368442	3542	82260	1636	3741
Hypo3	274023145	4472	61275	1436	3251

## Sheet: b_C25AltAnalyzeMarkers
ClusterID:MarkerGene
4:Chst1
4:Ednrb
4:Fibin
4:Apln
4:Tbx2
4:Car4
4:Enho
4:Prx
4:Emp2
4:Kdr
4:Tbx3
4:Pmp22
4:Igfbp7
4:Cdkn1a
4:Nhlrc2
4:Tmcc2
4:Rprml
4:Sept4
4:Cd34
4:Phlda3
4:Ccdc68
4:Tmeff2
4:Chst2
4:Kitl
4:Pcdh1
4:Cyp4b1
4:Stxbp6
4:Clu
4:Tmem204
4:Nrp1
4:Ptp4a3
4:C1qtnf2
4:Itgb5
4:Meox1
4:Adamtsl5
4:Serpine1
4:Nkd1
4:Rgs12
4:Tmem140
4:Foxf1
4:Hspb1
4:Itga3
4:Ecscr
4:Tspan12
4:Bcam
4:Endou
4:Smagp
4:Fgfr3
4:Ly6c1
4:Tspan13
4:Pllp
4:Stmn2
4:Mgst3
4:Gadd45b
4:Icam1
4:Tspan15
4:Sepp1
4:Mgll
4:Pard6g
4:Agfg1
11:Slc6a2
11:Prss23
11:Vwf
11:Amigo2
11:Cytl1
11:Lrg1
11:Tmem252
11:Vegfc
11:Lhx6
11:Ptprr
11:Vcam1
11:Ptgs2
11:Lbp
11:Ch25h
11:Jam2
11:Itgb4
11:Nr2f2
11:Tmem2
11:Rgs5
11:Cthrc1
11:Dnm3
11:Fam107a
11:Ptgs1
11:Tinagl1
11:Nrp2
11:Ndrg1
11:Crim1
11:Hs3st1
11:Bmp4
11:Adam15
11:Hyal2
11:Slc16a2
11:Grrp1
11:Il6st
11:Fam198b
11:Tll1
11:Tgm2
11:Samd5
11:Me3
11:Nox1
11:Kirrel3
11:Chn2
11:Heg1
11:Mras
11:Prcp
11:Kcnb1
11:Tcf23
11:Rin1
11:Pthlh
11:Meis2
11:Mmp16
11:Arhgap20
11:Rnf165
11:Dll1
11:Arrb1
11:Ctnnal1
11:Sema6b
11:Tnfsf10
11:Zfp423
11:Tmem109
16:Tm4sf1
16:Hey1
16:Eng
16:Sema3g
16:Gja4
16:Efnb2
16:Ace
16:Plat
16:Ptprb
16:Igfbp4
16:Ece1
16:Avpi1
16:Bmx
16:Slc3a2
16:Sulf1
16:Smad7
16:Gja5
16:Efna1
16:Ppp2r2c
16:Mecom
16:Plscr1
16:Mmrn2
16:Rbp7
16:Mcam
16:Enpp6
16:Dll4
16:Mkl2
16:Rgs3
16:Tmem88
16:Syt15
16:Marveld1
16:Utrn
16:Asap2
16:Mctp1
16:Esr2
16:Tmem255b
16:Stc1
16:Klf9
16:Nxn
16:Notch4
16:Dock9
16:Lama5
16:Cyp2d22
16:Plxnd1
16:Eogt
16:Tgtp2
16:Atoh8
16:Pcsk5
16:Elovl4
16:Cpd
16:Stk32a
16:Gpr4
16:Notch1
16:Kif26a
16:Cd300lg
16:Prodh
16:Qsox1
16:Phactr2
16:Tox3
16:Ntn1
22:Amd1
22:Sox17
22:Ier3
22:Cxcl12
22:Bnip3
22:Ntrk2
22:Ifngr1
22:Sox7
22:Rdx
22:Stmn1
22:Slc6a6
22:Cdk19
22:Bmpr2
22:Mapk3
22:Ccrl2
22:N4bp3
22:Aldoa
22:Rnf144a
22:Cmtm8
22:Cdk14
22:Akap12
22:1810011O10Rik
22:Cyp26b1
22:Cdc42ep1
22:Uaca
22:Tiam1
22:Tpi1
22:Etl4
22:Tjp1
22:She
22:9430020K01Rik
22:Eif4h
22:Vdac3
22:Anp32a
22:Lifr
22:Higd1a
22:Erg
22:Tapbp
22:Amotl2
22:Rcan1
22:Zbtb20
22:Pelo
22:6430548M08Rik
22:Tspan4
22:Amotl1
22:Kctd10
22:Ephx1
22:Slc26a10
22:Ido1
22:Mast4
22:Aph1a
22:Luzp1
22:Myo10
22:Cdr2l
22:Sbds
22:Specc1
22:Cnbp
22:Mxi1
22:H2-T23
22:Syne1
31:Gpihbp1
31:Edn1
31:Ankrd37
31:Plvap
31:Tspan7
31:Sema3c
31:Clec14a
31:Cd93
31:8430408G22Rik
31:BC028528
31:Cd200
31:Lyve1
31:Hilpda
31:Tmem100
31:Acer2
31:Pltp
31:Tek
31:Epas1
31:Cav1
31:Cav2
31:Hpgd
31:Egfl7
31:Aqp1
31:Calcrl
31:Itm2b
31:Cdh5
31:Sdpr
31:S100a16
31:Aplnr
31:Pde4b
31:Cyyr1
31:Slco2a1
31:Thbd
31:Plk2
31:Flt1
31:Bst2
31:Aldh2
31:Hmcn1
31:Lxn
31:Clec1a
31:Ifitm3
31:H2-D1
31:Car14
31:Tcn2
31:Cd36
31:Ctla2a
31:Nsg1
31:Kank3
31:Sptbn1
31:Ldb2
31:Slc43a3
31:Dusp6
31:Cadm1
31:Atp1a1
31:Nfib
31:Hoxa5
31:Wfdc1
31:Ifitm2
31:Gng11
31:Rasip1
24:Cd79a
24:H2-DMb2
24:Ms4a1
24:Ly6d
24:Cd79b
24:Ebf1
24:Iglc2
24:Siglecg
24:Cd74
24:Cd37
24:H2-Oa
24:Fcer2a
24:Mzb1
24:H2-Ob
24:Bank1
24:Tnfrsf13c
24:Ltb
24:H2-Eb1
24:Ralgps2
24:H2-Aa
24:Cd19
24:Fcrla
24:Vpreb3
24:H2-Ab1
24:Cd55
24:Cd22
24:Spib
24:Ptprcap
24:Fcrl1
24:Pou2af1
24:Hvcn1
24:Hmha1
24:Bcl11a
24:Ly86
24:Blnk
24:Btla
24:Cd52
24:Pax5
24:Rhoh
24:Serp1
24:Apobec3
24:Prkcb
24:Mef2c
24:Coro1a
24:Tspan32
24:Btg1
24:Pou2f2
24:March1
24:Cxcr5
24:Arhgdib
24:Rac2
24:H2-DMa
24:Blk
24:Fau
24:Cd72
24:Cd53
24:Sell
24:Rnase6
24:Trim7
24:Gimap7
10:Klrb1c
10:Ncr1
10:Gzmb
10:Klrk1
10:Klre1
10:Cma1
10:Klrc2
10:Klra8
10:Klra9
10:Gzma
10:Il2rb
10:Ctsw
10:Klrd1
10:Nkg7
10:Ccl5
10:Klra4
10:Klrc1
10:Klrb1a
10:Klrg1
10:Klra7
10:Klri2
10:Eomes
10:Klra3
10:Tbx21
10:Klrb1f
10:Khdc1a
10:Cst7
10:Samd3
10:Ccl4
10:AW112010
10:Cd244
10:Txk
10:Dok2
10:Sytl3
10:Prf1
10:Fasl
10:Il18rap
10:S1pr5
10:Phactr3
10:Selplg
10:Khdc1c
10:Serpinb9b
10:Lgals1
10:Padi2
10:Xcl1
10:Cym
10:Efhd2
10:Klrb1b
10:Fgl2
10:Tnfrsf9
10:Arsb
10:Id2
10:Cd7
10:Irf8
10:Styk1
10:H2afz
10:Gpr171
10:Kcnab2
10:Clnk
10:Pde2a
6:Lef1
6:Cd3e
6:Cd3g
6:Cd3d
6:Thy1
6:Dapl1
6:Lat
6:Ms4a4b
6:Lck
6:Il7r
6:Tcf7
6:Bcl11b
6:Cd28
6:Skap1
6:Cd8b1
6:Ms4a6b
6:Nsg2
6:Cd8a
6:Fam189b
6:Hcst
6:Satb1
6:Ccr7
6:Limd2
6:Cd6
6:Fyb
6:Cd247
6:Cd27
6:Themis
6:Sept1
6:Sh2d1a
6:Gimap3
6:Arl4c
6:Cd4
6:Slfn1
6:Tnfsf8
6:Kcnn4
6:Prkcq
6:Itk
6:Eef1a1
6:Cd5
6:Tmsb10
6:Zap70
6:Epsti1
6:Tpt1
6:Rgs10
6:Ptpn18
6:Dgka
6:Eef1b2
6:Lcn4
6:Arhgap15
6:Fam78a
6:Tagap
6:Npm1
6:Wdr89
6:Gramd3
6:Cd2
6:Cd96
6:Rasgrp1
6:Smc4
6:Evl
18:Cxcr6
18:Ly6g5b
18:Actn2
18:Podnl1
18:5830411N06Rik
18:Il12rb1
18:Tnfsf11
18:Acsbg1
18:Aqp3
18:Lingo4
18:Tnfrsf25
18:Fam83a
18:Itgb7
18:Dkkl1
18:5430421N21Rik
18:Kcnc1
18:Sit1
18:Pkp3
18:Pdcd1
18:Xlr4a
18:Ikzf2
18:Camk4
18:Zdhhc2
18:A230083G16Rik
18:Rab11fip4
18:Cd163l1
18:Kcnk7
18:Adam1a
18:Klk10
18:Neb
18:Gpr68
18:Gng13
18:Il2ra
18:Pram1
18:Wfikkn2
18:Ccnb2
18:Kbtbd13
18:Crmp1
18:Tktl1
18:Anxa6
18:Mcoln2
18:Apoa2
18:1810046K07Rik
18:Socs1
18:Zbtb32
18:Bzrap1
18:Ydjc
18:Galnt12
18:Cenpi
18:Cenpa
18:Rasal1
18:Cep55
18:Fads6
18:Adra2c
18:Zcwpw1
18:Apobec2
18:Fam120c
18:Dlgap5
18:Ero1l
18:Zfp712
2:Atp6v0d2
2:Ear1
2:Mrc1
2:Tnfaip2
2:Abcg1
2:Krt79
2:Ltc4s
2:Fabp1
2:Hebp1
2:Il18
2:Cidec
2:Ear2
2:Cd44
2:Itgax
2:Clec4n
2:Klhdc4
2:Olr1
2:Mpeg1
2:Axl
2:Krt19
2:F7
2:Acaa1b
2:Bcl2a1a
2:Cd300lf
2:Gal
2:Tcf7l2
2:Nceh1
2:Slc7a2
2:Dmxl2
2:Il1rn
2:Cib2
2:Ccl6
2:Alox5
2:Fpr1
2:Marco
2:Ctsk
2:Pld3
2:Tfec
2:Csf2rb
2:Ftl1
2:Bcl2a1d
2:Sirpa
2:Bcl2a1b
2:Sh2d1b1
2:Bhlhe41
2:Fpr2
2:Cd164
2:Cd200r4
2:Abcd2
2:Ms4a8a
2:B3gnt7
2:Lgals3
2:Tlr2
2:Pygl
2:Cpne5
2:Cebpb
2:Fth1
2:C5ar1
2:Mcoln3
2:Lpl
29:Alox15
29:Cyp11a1
29:Cpa3
29:Ms4a2
29:Cd5l
29:Padi4
29:Mcpt8
29:Prg4
29:Fcer1a
29:Cd200r3
29:Emilin2
29:Csrp3
29:Fcna
29:Samd13
29:Cxcr2
29:Il4
29:Defb40
29:F5
29:Ccl3
29:Prtn3
29:Cxcl13
29:Saa3
29:Serpinb2
29:Il6
29:Clec2g
29:Naip1
29:Adam8
29:Cfp
29:Ccr1
29:Mlxipl
29:Selp
29:Fabp7
29:Rnase12
29:Slc18a2
29:Garnl3
29:Comp
29:Engase
29:Matk
29:Cldn4
29:Slc41a3
29:Gbp2b
29:Fhl2
29:Fxyd7
29:Tarm1
29:Aqp9
29:Cenpk
29:Btnl9
29:Itsn1
29:Ptger3
29:Supt3
29:Cryl1
29:Stfa2l1
29:F2rl3
29:Oit3
29:Ctse
29:Csf1
29:Heatr5a
29:Reg3g
29:Mboat1
29:Mob3a
21:Eno3
21:Cd300e
21:Treml4
21:Lst1
21:Cd300ld
21:Pglyrp1
21:Csf1r
21:Nr4a1
21:Lair1
21:Clec4a1
21:Trem3
21:Cd300a
21:Itgal
21:Clec4a3
21:Fcgr4
21:Fgr
21:Sirpb1a
21:Pilrb1
21:AF251705
21:Ly6i
21:Pilrb2
21:Tgm3
21:Spn
21:Tnfrsf1b
21:Cx3cr1
21:Serpinb10
21:Fabp4
21:Pla2g7
21:Pilra
21:Rap1gap2
21:Samsn1
21:Apoc2
21:Metrnl
21:Myo1g
21:Slc11a1
21:Gsr
21:Gngt2
21:Tmem51
21:Adrbk2
21:Tlr13
21:Fam49a
21:Itga4
21:Adssl1
21:Gpx1
21:Skint3
21:Cyp2ab1
21:Stk10
21:Slc16a3
21:Itgam
21:Lcp2
21:Hfe
21:Apoe
21:Ldlrad3
21:Hck
21:Sat1
21:Ctsb
21:Il17ra
21:Rgs2
21:Dusp5
21:Cytip
7:Ifitm6
7:Cd177
7:F13a1
7:Ms4a6c
7:Ccr2
7:Ccl9
7:Wfdc17
7:Ly6c2
7:Mnda
7:S100a4
7:Ifi204
7:Igsf6
7:Fcgr3
7:AI607873
7:Lrrc25
7:Ptafr
7:Sirpb1b
7:Klra2
7:Clec4a2
7:Irf5
7:Ptpro
7:Msr1
7:Plac8
7:Evi2a
7:Csf2ra
7:Mmp8
7:Gpr141
7:Tifab
7:Clec12a
7:Ifi27l2a
7:Slamf8
7:Cd300lb
7:Tnfrsf21
7:Sap30
7:Fos
7:Emb
7:Prkcd
7:Pld4
7:Fam49b
7:Galnt9
7:Apobec1
7:Prdx5
7:Myo1f
7:Glipr1
7:Guca1a
7:Atp1a3
7:Ninj1
7:Gpr35
7:Tmcc1
7:Tifa
7:Smpdl3a
7:Ccdc109b
7:Samhd1
7:Csf3r
7:Mefv
7:Cyp27a1
7:Zbp1
7:Lilra6
7:D1Ertd622e
7:Rbks
20:C1qc
20:C1qa
20:C1qb
20:Ms4a7
20:Fcrls
20:C3ar1
20:Fxyd2
20:Cd163
20:Folr2
20:Ccl24
20:Cd14
20:Cd209f
20:Gatm
20:Cd209g
20:Pla2g2d
20:P2ry6
20:Retnla
20:Ccl8
20:Trem2
20:Cd209b
20:Gas7
20:Mafb
20:Ccdc106
20:Ccl7
20:Fcgr1
20:Hpgds
20:Tnfrsf17
20:Gpr160
20:Abca9
20:Ntpcr
20:Rab3il1
20:B4galt6
20:Tmem141
20:Gpr34
20:Nxpe5
20:Npl
20:Mmp9
20:Ccl12
20:Lgmn
20:Dse
20:Blvrb
20:Prss30
20:Myo5a
20:Siglech
20:Scamp5
20:Zmynd15
20:Nckap1l
20:Lacc1
20:Nat8l
20:Rab11fip5
20:Daglb
20:Atp6v1g2
20:Cd80
20:Homer1
20:Sgpp1
20:Frmd4b
20:Bbs12
20:Dclre1c
20:Rasl2-9
20:Ophn1
12:Cd209a
12:Lmo1
12:Mgl2
12:Flt3
12:Ccl17
12:Hepacam2
12:Pak1
12:Plbd1
12:Nccrp1
12:Amica1
12:Clec4b1
12:Sept3
12:Aif1
12:Il1rl1
12:AA467197
12:Tnni2
12:Tnip3
12:Ppfia4
12:Pid1
12:Batf3
12:Xcr1
12:H2-DMb1
12:Ltb4r1
12:Clec10a
12:Gcsam
12:Fcgr2b
12:Qpct
12:Cst3
12:Cd207
12:Fndc7
12:Wdfy4
12:Cldn1
12:Slamf7
12:Cd209d
12:Olfm1
12:Ifi205
12:Rbpj
12:Kctd14
12:Cysltr1
12:Celf4
12:St3gal5
12:A530099J19Rik
12:Clec9a
12:Cd209c
12:Tspan33
12:Tep1
12:Cyth4
12:Ccr5
12:Upb1
12:Pianp
12:Plp2
12:Basp1
12:Timd4
12:Atox1
12:Rgag4
12:Ctnnd2
12:Xlr
12:Pip4k2a
12:Tlr11
12:Camk1d
15:Treml1
15:Mpl
15:Tmem40
15:Gp6
15:Gp5
15:Alox12
15:Ly6g6f
15:Itga2b
15:Gp1bb
15:Gp9
15:Nrgn
15:Samd14
15:Gnaz
15:Clec1b
15:Gsta2
15:Pls1
15:F2rl2
15:Gata1
15:Ankrd35
15:P2ry12
15:Ppbp
15:Mfsd2b
15:Ccdc92
15:Gfi1b
15:P2ry1
15:Capn3
15:Hist1h4h
15:Gp1ba
15:Nlrp6
15:Cxcl5
15:Kalrn
15:Stx11
15:Ttll11
15:Cass4
15:Rgs18
15:Hist1h4i
15:Smim3
15:Slc2a3
15:Proser2
15:Itgb3
15:Rab27b
15:Arhgap10
15:Sytl4
15:Sptb
15:Ache
15:Nfe2
15:Ly6g6c
15:Cdh23
15:Pf4
15:4930550C14Rik
15:Nlrx1
15:Ppif
15:Cdc42ep5
15:Ssx2ip
15:Cited4
15:Cd59b
15:Prokr1
15:Mmd
15:Srxn1
15:Fermt3
3:Slc7a10
3:Cdo1
3:Pdgfra
3:Col13a1
3:Tcf21
3:Npnt
3:Upk1b
3:Cxcl14
3:Ms4a4d
3:Ogn
3:Slc38a5
3:Tmem119
3:Spon1
3:Mfap4
3:Scarf2
3:Dpep1
3:Scube2
3:Colq
3:Figf
3:Wnt2
3:Olfml3
3:Slc36a2
3:Atp1a2
3:Inmt
3:Aldh1a1
3:G0s2
3:Cdh11
3:Prelp
3:Sod3
3:Hsd11b1
3:Lrat
3:Nebl
3:Gpx3
3:Rbp1
3:Limch1
3:Fgf7
3:Igfbp3
3:Mxra8
3:Plxdc2
3:Pcolce2
3:Scn3a
3:Wisp2
3:Serping1
3:Adamtsl2
3:Svep1
3:Colec12
3:Gsta3
3:Robo2
3:C1qtnf7
3:Cp
3:Pcolce
3:Nol3
3:Efemp1
3:Ptprd
3:Gpc3
3:Vgll3
3:Mamdc2
3:Adrb3
3:Lox
3:Cfh
17:Serpinf1
17:Dcn
17:Cygb
17:Clec3b
17:Adamts2
17:Fbln1
17:Col14a1
17:Mfap5
17:Pi16
17:Itgbl1
17:Apod
17:Entpd2
17:Col1a1
17:Cpxm1
17:Mmp2
17:Dpt
17:Ccl11
17:3632451O06Rik
17:Gas1
17:Col1a2
17:Lum
17:Scara5
17:Col3a1
17:Smoc2
17:Rbp4
17:Gdf10
17:Pamr1
17:Abcc9
17:Aebp1
17:Igfbp6
17:Htra3
17:C1ra
17:Islr
17:Lama2
17:Cd248
17:Pdgfrl
17:Srpx
17:Clec11a
17:C4b
17:Col6a2
17:Igf1
17:Rcn3
17:Cilp
17:Tnfaip6
17:Podn
17:Dact1
17:Sult5a1
17:Twist2
17:Osr1
17:Spon2
17:Bicc1
17:Vit
17:Ptgfr
17:Igsf10
17:Lsamp
17:Mmp3
17:Nbl1
17:Timp1
17:C3
17:Sfrp4
8:Cnn1
8:Myh11
8:Actg2
8:Hspb7
8:Synpo2
8:Sh3bgr
8:Lmod1
8:Des
8:Actc1
8:Tagln
8:Hspb6
8:Tpm2
8:Col18a1
8:Adcy5
2.98262e+06
8:Ctgf
8:Aoc3
8:Acta2
8:Myl9
8:Optc
8:Pcdh7
8:Id4
8:Timp4
8:Scube3
8:Gpc6
8:Kcnmb1
8:Pi15
8:Plin4
8:Sgcg
8:Npy1r
8:Fbxl22
8:Tcap
8:Itga8
8:Fblim1
8:Mustn1
8:Ldb3
8:Rrad
8:Map3k7cl
8:P2rx1
8:Myom1
8:Lgr6
8:Smarcd3
8:Adam33
8:Pdlim3
8:Map1b
8:Jph2
8:Cdh13
8:Dmpk
8:Enah
8:Ppp1r14a
8:Rhobtb1
8:Kcna5
8:Fxyd1
8:Thsd4
8:Nexn
8:Pdlim4
8:Speg
8:Smtn
8:Cpe
8:Ntf3
13:Vtn
13:Higd1b
13:Agtr1a
13:Gap43
13:Lipg
13:Trpc6
13:Vsnl1
13:Ndufa4l2
13:Cox4i2
13:9230104L09Rik
13:Fam162b
13:Gucy1b3
13:Gucy1a3
13:Pdgfrb
13:Nkain4
13:Adcy8
13:Ltbp2
13:Postn
13:Art3
13:Pde5a
13:Tmem178
13:Pcdh18
13:Fst
13:Klhl23
13:Emid1
13:Notch3
13:Kcnk3
13:Spp1
13:Ism1
13:Lmcd1
13:Wfdc6a
13:Cdkn1c
13:Nr2f1
13:Ifitm1
13:Pdzd2
13:Rerg
13:Vstm4
13:Il34
13:Mettl21e
13:Cdk18
13:Reck
13:Tmem200a
13:Angptl2
13:Sdc2
13:Col8a1
13:Arhgef17
13:Chn1
13:Ephx3
13:Foxf2
13:Arhgap42
13:Pcdh19
13:Akr1b7
13:Vstm2b
13:Fjx1
13:Tusc5
13:Clstn2
13:Rasl11a
13:Adap2
13:Gpc4
13:Nr1h3
9:Scnn1g
9:Rtkn2
9:Igfbp2
9:Col4a3
9:Flrt3
9:Spock2
9:Ndnf
9:Bdnf
9:Pdpn
9:Cyp2b10
9:Krt7
9:2210011C24Rik
9:Plb1
9:Scel
9:Scnn1b
9:Tacstd2
9:Akap5
9:Itgb6
9:Col4a4
9:Sema3e
9:Spink4
9:Lamc2
9:Slc6a14
9:Popdc3
9:Gprc5a
9:Clic3
9:Gpm6a
9:Aqp5
9:Wnt3a
9:Mal2
9:2310007B03Rik
9:Pard6b
9:Slc39a8
9:Slc39a4
9:Ano1
9:Sh3rf2
9:Arxes2
9:Sema3a
9:Sec14l3
9:Crlf1
9:Sphk1
9:Serinc2
9:Abca5
9:Pkp2
9:Tmem37
9:Cxadr
9:Matn4
9:Gipc2
9:Ptprn
9:Slc7a4
9:Tmprss2
9:Cgn
9:Ager
9:Dapk2
9:Sybu
9:Mthfd1
9:Il17re
9:Dusp14
9:Liph
9:Hs2st1
30:Mmrn1
30:Reln
30:Prox1
30:Fxyd6
30:Slc45a3
30:Pcsk6
30:Apba2
30:Ccl21a
30:Ptx3
30:Ccl21b
30:Scn1b
30:Hoxd9
30:Pld5
30:Tbx1
30:Klhl4
30:Lrrn4cl
30:Cldn11
30:Duoxa2
30:Bok
30:Stab2
30:Rasd1
30:Sh3gl3
30:Cpne7
30:Maf
30:Col26a1
30:Atp8a2
30:Spsb4
30:Flt4
30:Itih5
30:Sema3d
30:Il7
30:Ank
30:F8
30:Pvrl2
30:Susd4
30:Tshz2
30:Sned1
30:6430573F11Rik
30:Pear1
30:Stab1
30:Kcng2
30:Lhfpl2
30:Cpne2
30:Gprc5b
30:Ebf4
30:1110032F04Rik
30:Itih3
30:Apoc4
30:Thsd7a
30:Ppfibp1
30:Tagln3
30:Arl4a
30:Flywch2
30:Tnfaip8l1
30:Fscn1
30:Tbc1d4
30:Cst6
30:Lrrc4c
30:Hjurp
30:Ephb1
0:Hba-a1
0:Hba-a2
0:Alas2
0:Snca
0:Bpgm
0:Ube2l6
0:Fech
0:Isg20
0:Mkrn1
0:Fam220a
0:Fam46c
0:Gypa
0:Rsad2
0:Tspo2
0:Trim10
0:Slc4a1
0:Paqr9
0:Slc25a37
0:Fam213a
0:Hbq1b
0:Isca1
0:Ube2c
0:Dhrs11
0:Ccndbp1
0:Ppp1cb
0:Nusap1
0:Hbq1a
0:Tfdp2
0:Apol11b
0:March2
0:Dcaf12
0:Bnip3l
0:Rhd
0:Hemgn
0:AK157302
0:Rnf10
0:Slc25a39
0:Hagh
0:Spta1
0:Pnpo
5:Sfta2
5:Hc
5:Lamp3
5:S100g
5:Bex4
5:Pla2g1b
5:Sftpc
5:Egfl6
5:Slc34a2
5:Sftpd
5:Muc1
5:Lcn2
5:Lgi3
5:Sftpb
5:Bex2
5:Ank3
5:Dram1
5:Ppp1r14c
5:Fasn
5:Scd1
5:Wfdc2
5:Sftpa1
5:Snhg11
5:Cox6a2
5:Etv5
5:Atp6v1c2
5:Ptprf
5:Mlc1
5:Atp1b1
5:Cbr2
5:Npw
5:Nkx2-1
5:Cldn18
5:Cldn3
5:Acoxl
5:Slco4c1
5:Smim6
5:Scgb1c1
5:Rbpjl
5:Irx3
5:Apoc1
5:Sdc1
5:Abca3
5:Ang
5:Tfcp2l1
5:C6
5:Cpm
5:Kcnj15
5:Alcam
5:Fabp5
5:Krt23
5:Irx1
5:Acot7
5:Il33
5:Rnase4
5:Pi4k2b
5:Kcnc3
5:Prnp
5:5330417C22Rik
5:Aox3
14:Mapk15
14:Tekt1
14:Iqca
14:Cdhr3
14:Sntn
14:1700001C02Rik
14:Ccdc65
14:Fam166b
14:1700007K13Rik
14:Ppp1r36
14:Fam216b
14:BC051019
14:1110017D15Rik
14:Rsph1
14:Clic6
14:Ccdc153
14:Ccdc113
14:Acox2
14:Tmem212
14:Spag17
14:Ccdc39
14:Arhgdig
14:Dcdc2a
14:1700016K19Rik
14:Riiad1
14:Fam183b
14:9530053A07Rik
14:Syt5
14:Efcab10
14:Tctex1d4
14:1700001L19Rik
14:Fam92b
14:Cyp2s1
14:Ubxn10
14:Foxj1
14:Ldlrad1
14:Fermt1
14:Pifo
14:Lrrc10b
14:Hydin
14:Cyp2f2
14:Anxa8
14:6430531B16Rik
14:Dmkn
14:Meig1
14:Nek5
14:Dynlrb2
14:Stmnd1
14:Mycbpap
14:1700024G13Rik
14:Rsph4a
14:Wdr66
14:2410004P03Rik
14:1700013F07Rik
14:Ankrd65
14:Fam47e
14:Rgs22
14:Capsl
14:Ak7
14:Eno4

## Sheet: c_CellTypes
ClusterID	cellTypeFullName	cellTypeBriefName	Ctrl1	Ctrl2	Ctrl3	Hypo1	Hypo2	Hypo3
4	Endothelial	Endo	303	315	140	441	285	353
11	Endothelial	Endo	192	197	106	172	133	132
16	Endothelial	Endo	296	380	226	212	186	198
22	Endothelial	Endo	177	239	149	646	324	719
31	Endothelial	Endo	759	707	405	772	618	388
24	B cells	Bcells	1401	1130	1800	486	562	812
10	NK cells	NK	325	197	484	53	43	170
6	T cells	Tcells	409	274	626	177	184	290
18	NK T cells	NK-T	78	35	51	33	56	45
2	Macrophages	Mphage	227	259	171	205	210	288
29	Basophils	Baso	28	19	45	8	20	29
21	Monocytes_CD115-CSF1R-positive	Mono	184	165	374	68	69	136
7	Monocytes	Mono	299	182	494	74	41	149
20	Macrophage-Dendritic_CD163+	Mphage-DC	36	38	26	17	65	23
12	Dendritic cells	DC	156	133	143	83	113	65
15	Megakaryocytes	MegK	14	17	28	5	7	19
3	Fibroblasts	FB	78	53	20	97	49	62
17	Fibroblasts	FB	46	29	22	59	37	20
8	Myofibroblast	MyoFB	43	52	94	97	72	55
13	Pericytes	Pcyte	17	13	3	38	11	19
9	AT1	AT1	8	8	1	49	28	23
30	Lymphatic Endo	LymEndo	20	22	12	24	17	10
0	Erythroblast	Erythro	168	305	193	282	170	273
5	AT2	AT2	197	223	22	192	210	167
14	Ciliated	Ciliated	13	19	5	20	32	27
#note: one cell from the contrl group is excluded by AltAnalzye during the clustering

## Sheet: d_DEGtop200
cellType	gene	baseMean	log2FoldChange	lfcSE	stat	pvalue	padj	group	index
AT1	Tnfrsf12a	23.9947	2.00432	0.51475	3.89378	9.86956e-05	0.999927	Up	1
AT1	Phlda1	4.5171	4.28861	1.29826	3.30334	0.000955406	0.999927	Up	2
AT1	Ier3	176.934	0.797854	0.241622	3.30207	0.000959746	0.999927	Up	3
AT1	Cyr61	53.5726	1.07019	0.331148	3.23175	0.00123034	0.999927	Up	4
AT1	Scd2	65.4072	0.791701	0.279082	2.8368	0.00455683	0.999927	Up	5
AT1	Scel	11.9008	1.68418	0.608456	2.76796	0.00564091	0.999927	Up	6
AT1	Fjx1	3.07238	3.73536	1.35125	2.76439	0.00570302	0.999927	Up	7
AT1	Hbegf	34.0948	1.21655	0.456018	2.66776	0.00763589	0.999927	Up	8
AT1	Cpq	11.5491	1.64198	0.620093	2.64796	0.00809785	0.999927	Up	9
AT1	Mbnl1	11.9476	1.52448	0.592282	2.57391	0.0100555	0.999927	Up	10
AT1	Rgcc	130.473	0.74264	0.293563	2.52975	0.0114144	0.999927	Up	11
AT1	Mlf2	26.727	0.980686	0.389284	2.5192	0.0117621	0.999927	Up	12
AT1	Tuba1a	49.648	0.831109	0.332681	2.49821	0.0124821	0.999927	Up	13
AT1	Tmem37	86.3528	0.675943	0.275522	2.45332	0.0141546	0.999927	Up	14
AT1	Bdnf	32.2261	0.992386	0.41079	2.4158	0.0157006	0.999927	Up	15
AT1	B2m	239.571	0.575931	0.238963	2.41012	0.0159472	0.999927	Up	16
AT1	Calm2	117.305	0.505396	0.212413	2.37931	0.0173449	0.999927	Up	17
AT1	Crlf1	13.6373	1.25464	0.53055	2.36479	0.0180401	0.999927	Up	18
AT1	Spink4	4.81393	2.54323	1.08074	2.35322	0.0186116	0.999927	Up	19
AT1	Krt19	86.2525	0.625719	0.272331	2.29764	0.0215821	0.999927	Up	20
AT1	Tmem248	4.5288	2.45812	1.07109	2.29498	0.0217343	0.999927	Up	21
AT1	Fbxl5	3.65246	2.89302	1.26772	2.28207	0.0224854	0.999927	Up	22
AT1	Elovl5	18.7374	1.02698	0.452605	2.26903	0.0232662	0.999927	Up	23
AT1	Gpatch11	2.08933	3.17559	1.40101	2.26665	0.0234118	0.999927	Up	24
AT1	Fam89b	2.12545	3.22658	1.4243	2.26539	0.023489	0.999927	Up	25
AT1	Phldb2	9.05643	1.68603	0.745297	2.26222	0.0236836	0.999927	Up	26
AT1	Igfbp2	308.629	0.848341	0.375607	2.25859	0.0239089	0.999927	Up	27
AT1	Sgk1	8.2258	1.67675	0.746772	2.24533	0.0247469	0.999927	Up	28
AT1	Baiap2	6.20652	1.94158	0.870057	2.23156	0.0256443	0.999927	Up	29
AT1	Ppic	16.3998	1.08757	0.48736	2.23155	0.0256446	0.999927	Up	30
AT1	Pgap2	7.61085	1.62017	0.745544	2.17313	0.0297703	0.999927	Up	31
AT1	Gipc1	1.93381	3.07894	1.42168	2.1657	0.0303341	0.999927	Up	32
AT1	Akap2	22.4244	1.01182	0.473467	2.13704	0.0325945	0.999927	Up	33
AT1	Fabp5	3.33398	2.83409	1.32658	2.13638	0.0326486	0.999927	Up	34
AT1	Smad7	3.2577	2.71486	1.28232	2.11715	0.0342474	0.999927	Up	35
AT1	Nnat	2.03479	3.12232	1.4766	2.11454	0.0344694	0.999927	Up	36
AT1	Lppos	1.869	3.03828	1.43915	2.11117	0.0347577	0.999927	Up	37
AT1	Igfbp7	435.744	0.595431	0.282988	2.10409	0.0353707	0.999927	Up	38
AT1	Pnpla2	5.76728	1.95586	0.932067	2.09841	0.0358691	0.999927	Up	39
AT1	Zfyve21	35.5981	0.747244	0.357056	2.09279	0.0363678	0.999927	Up	40
AT1	Tmem5	5.85487	1.81931	0.871861	2.0867	0.0369154	0.999927	Up	41
AT1	Myg1	1.82835	2.98677	1.43138	2.08664	0.0369206	0.999927	Up	42
AT1	Mrpl24	5.70354	1.78356	0.8566	2.08214	0.0373297	0.999927	Up	43
AT1	Mrpl48	8.45722	1.51131	0.728518	2.07449	0.0380334	0.999927	Up	44
AT1	Wasf2	9.26669	1.52803	0.737587	2.07166	0.0382971	0.999927	Up	45
AT1	Bsg	174.51	0.46124	0.22352	2.06353	0.0390623	0.999927	Up	46
AT1	Rcan1	1.76807	2.93567	1.43936	2.03956	0.0413942	0.999927	Up	47
AT1	Tpm2	4.78659	2.03312	1.00124	2.0306	0.0422954	0.999927	Up	48
AT1	Gaa	5.25317	2.17264	1.07265	2.0255	0.0428162	0.999927	Up	49
AT1	Ywhah	34.3969	0.688412	0.340386	2.02245	0.0431303	0.999927	Up	50
AT1	Tmc4	7.65044	1.58746	0.792467	2.00319	0.0451572	0.999927	Up	51
AT1	Igfbp6	140.697	0.584538	0.292211	2.0004	0.0454574	0.999927	Up	52
AT1	Rnf6	3.74538	2.19875	1.10694	1.98634	0.046996	0.999927	Up	53
AT1	B4gat1	4.73858	1.91159	0.965504	1.97988	0.0477166	0.999927	Up	54
AT1	Med29	3.7266	2.13999	1.08388	1.97437	0.0483394	0.999927	Up	55
AT1	Gpr89	1.70239	2.87355	1.45607	1.9735	0.0484386	0.999927	Up	56
AT1	Nat9	1.68189	2.8582	1.45527	1.96403	0.0495261	0.999927	Up	57
AT1	Anxa6	9.93565	1.29747	0.660727	1.9637	0.0495646	0.999927	Up	58
AT1	Rrp9	1.67858	2.85805	1.45671	1.96199	0.0497636	0.999927	Up	59
AT1	Edn1	4.27133	2.45399	1.25296	1.95856	0.0501647	0.999927	Up	60
AT1	Gapdh	35.5847	0.784883	0.400818	1.9582	0.0502065	0.999927	Up	61
AT1	Bmp4	9.5315	1.33664	0.685266	1.95055	0.051111	0.999927	Up	62
AT1	Fibin	1.69334	2.88992	1.48645	1.94418	0.0518734	0.999927	Up	63
AT1	Mgp	17.8211	1.1848	0.610697	1.94008	0.0523695	0.999927	Up	64
AT1	Zc3h7a	3.70697	2.143	1.10527	1.9389	0.0525133	0.999927	Up	65
AT1	Phip	3.72033	2.12449	1.10606	1.92078	0.0547599	0.999927	Up	66
AT1	Borcs7	3.67692	2.19241	1.14402	1.91641	0.0553128	0.999927	Up	67
AT1	Edem2	6.13091	1.53188	0.801582	1.91107	0.0559959	0.999927	Up	68
AT1	Usp39	7.6073	1.68418	0.882256	1.90894	0.0562697	0.999927	Up	69
AT1	Isyna1	1.59449	2.78575	1.46259	1.90468	0.056822	0.999927	Up	70
AT1	Fuca2	14.0513	1.01976	0.536931	1.89924	0.0575327	0.999927	Up	71
AT1	Vps36	4.46581	1.8121	0.959608	1.88837	0.0589762	0.999927	Up	72
AT1	Serf2	92.6595	0.460643	0.244111	1.88702	0.0591573	0.999927	Up	73
AT1	Alcam	49.8795	0.610742	0.32385	1.88588	0.0593113	0.999927	Up	74
AT1	Eci2	5.23201	1.6665	0.884253	1.88464	0.059478	0.999927	Up	75
AT1	Faf1	2.79812	2.48069	1.31643	1.88441	0.0595094	0.999927	Up	76
AT1	Ssr1	6.25874	1.61624	0.859971	1.87941	0.0601886	0.999927	Up	77
AT1	Dlg4	1.63671	2.81076	1.49758	1.87687	0.0605366	0.999927	Up	78
AT1	Os9	14.4289	0.946978	0.508414	1.86261	0.0625171	0.999927	Up	79
AT1	Timp3	112.668	0.691014	0.371197	1.86159	0.0626616	0.999927	Up	80
AT1	Tmem176a	39.0051	0.636145	0.341787	1.86123	0.0627112	0.999927	Up	81
AT1	Serinc5	1.55349	2.75358	1.47971	1.86089	0.0627593	0.999927	Up	82
AT1	Pcyt2	1.59902	2.77812	1.49361	1.86	0.0628849	0.999927	Up	83
AT1	Tmem234	15.7688	0.876745	0.472888	1.85403	0.0637356	0.999927	Up	84
AT1	Tm7sf3	1.66713	2.83124	1.52963	1.85093	0.0641794	0.999927	Up	85
AT1	Gpc3	4.73929	2.1018	1.13574	1.8506	0.0642273	0.999927	Up	86
AT1	Ostf1	33.6225	0.61402	0.331931	1.84984	0.0643364	0.999927	Up	87
AT1	Fgf18	3.58048	2.05129	1.11041	1.84732	0.0647004	0.999927	Up	88
AT1	Pard6b	15.8539	0.949239	0.514786	1.84395	0.0651904	0.999927	Up	89
AT1	F2r	17.161	0.834152	0.455914	1.82962	0.0673061	0.999927	Up	90
AT1	Cnpy3	3.42268	2.37729	1.30341	1.82389	0.0681683	0.999927	Up	91
AT1	Mageh1	3.41145	2.03912	1.11803	1.82386	0.0681738	0.999927	Up	92
AT1	Mapk1ip1l	1.59362	2.77042	1.52088	1.82159	0.0685167	0.999927	Up	93
AT1	Nisch	12.669	0.983103	0.543281	1.80957	0.0703629	0.999927	Up	94
AT1	Oxct1	1.48207	2.70234	1.49563	1.80682	0.0707903	0.999927	Up	95
AT1	Rnf144a	1.48207	2.70234	1.49563	1.80682	0.0707903	0.999927	Up	96
AT1	Smim12	5.38017	1.63084	0.903493	1.80503	0.0710695	0.999927	Up	97
AT1	2210016F16Rik	5.1833	1.58194	0.877273	1.80324	0.0713497	0.999927	Up	98
AT1	Clta	23.0965	0.743294	0.413685	1.79676	0.0723737	0.999927	Up	99
AT1	Cycs	17.0255	0.844299	0.470367	1.79498	0.0726572	0.999927	Up	100
AT1	Tpm3	49.7321	0.580506	0.324063	1.79134	0.0732393	0.999927	Up	101
AT1	Smarcd3	1.50135	2.72698	1.52309	1.79042	0.0733858	0.999927	Up	102
AT1	Ndufa3	34.3436	0.632056	0.354511	1.7829	0.0746032	0.999927	Up	103
AT1	Vldlr	1.4435	2.64739	1.48699	1.78037	0.0750155	0.999927	Up	104
AT1	Skiv2l	1.45948	2.67485	1.50332	1.77929	0.0751925	0.999927	Up	105
AT1	Rnd1	12.757	0.932945	0.526168	1.77309	0.0762133	0.999927	Up	106
AT1	Cyp4f13	2.52326	2.31562	1.307	1.77171	0.0764433	0.999927	Up	107
AT1	Pam16	9.35011	1.17086	0.663063	1.76584	0.0774223	0.999927	Up	108
AT1	Khdrbs1	4.10392	1.71914	0.976571	1.76038	0.0783429	0.999927	Up	109
AT1	Emp2	201.258	0.363108	0.206286	1.76021	0.0783714	0.999927	Up	110
AT1	Rilp	2.50226	2.36929	1.34958	1.75558	0.07916	0.999927	Up	111
AT1	Sox17	2.51722	2.39591	1.36738	1.75219	0.0797403	0.999927	Up	112
AT1	Smpd4	1.46192	2.65533	1.51609	1.75143	0.0798719	0.999927	Up	113
AT1	2410015M20Rik	15.4373	0.824595	0.472054	1.74682	0.0806682	0.999927	Up	114
AT1	Cd44	1.3992	2.6116	1.49718	1.74435	0.0810982	0.999927	Up	115
AT1	Fam46b	2.51751	2.32659	1.33487	1.74293	0.0813459	0.999927	Up	116
AT1	Micu1	6.51189	1.32006	0.761942	1.73249	0.0831867	0.999927	Up	117
AT1	St6galnac2	4.2062	1.88554	1.08932	1.73094	0.083463	0.999927	Up	118
AT1	Ankrd1	7.27575	1.25337	0.724539	1.72989	0.0836495	0.999927	Up	119
AT1	Selenbp1	119.745	0.426003	0.246793	1.72616	0.0843193	0.999927	Up	120
AT1	Rangap1	1.4025	2.61164	1.51556	1.72322	0.0848488	0.999927	Up	121
AT1	Trim16	14.7737	0.862666	0.503239	1.71423	0.0864873	0.999927	Up	122
AT1	Batf	1.42544	2.60967	1.5237	1.71272	0.0867638	0.999927	Up	123
AT1	App	65.3394	0.482648	0.282088	1.71098	0.0870839	0.999927	Up	124
AT1	Rnh1	14.0152	0.862004	0.504154	1.7098	0.0873025	0.999927	Up	125
AT1	Ppm1l	2.43708	2.25323	1.3185	1.70893	0.0874641	0.999927	Up	126
AT1	Cav1	149.709	0.369183	0.216459	1.70556	0.0880901	0.999927	Up	127
AT1	Plod2	14.1813	0.982356	0.577472	1.70113	0.0889178	0.999927	Up	128
AT1	Pex2	8.60118	1.27634	0.752085	1.69707	0.0896833	0.999927	Up	129
AT1	Zfp865	1.53995	2.7178	1.60187	1.69664	0.0897642	0.999927	Up	130
AT1	Apmap	6.64369	1.35958	0.801664	1.69594	0.0898969	0.999927	Up	131
AT1	Nol12	1.35489	2.57424	1.51835	1.69542	0.0899958	0.999927	Up	132
AT1	Psmd14	3.35857	1.90213	1.12566	1.68979	0.0910681	0.999927	Up	133
AT1	Ikbip	2.49252	2.26854	1.34404	1.68785	0.0914392	0.999927	Up	134
AT1	Gm8797	7.38296	1.25321	0.742775	1.6872	0.0915655	0.999927	Up	135
AT1	Xpnpep1	2.3353	2.25289	1.33615	1.68611	0.0917753	0.999927	Up	136
AT1	Rrbp1	9.33103	1.04569	0.620686	1.68473	0.0920405	0.999927	Up	137
AT1	Park7	27.8147	0.607872	0.361574	1.68118	0.092728	0.999927	Up	138
AT1	Ager	2657.88	0.423449	0.251952	1.68067	0.0928266	0.999927	Up	139
AT1	Skil	1.33561	2.54467	1.51461	1.68009	0.0929405	0.999927	Up	140
AT1	Esf1	3.17875	1.87625	1.11849	1.67748	0.0934492	0.999927	Up	141
AT1	Cd3g	1.3323	2.54433	1.51815	1.67594	0.0937503	0.999927	Up	142
AT1	Fuca1	7.80772	1.13669	0.681251	1.66854	0.0952093	0.999927	Up	143
AT1	Rfwd2	2.42232	2.22463	1.33334	1.66847	0.0952228	0.999927	Up	144
AT1	Gpx8	4.77711	1.48715	0.89375	1.66394	0.0961244	0.999927	Up	145
AT1	Amdhd2	1.37904	2.56188	1.54213	1.66126	0.0966606	0.999927	Up	146
AT1	Rbfox2	1.3118	2.52519	1.5236	1.65739	0.0974414	0.999927	Up	147
AT1	Ndufa5	15.7686	0.832046	0.503369	1.65296	0.0983399	0.999927	Up	148
AT1	Abhd12	3.88847	1.61598	0.978841	1.65091	0.0987575	0.999927	Up	149
AT1	Rhoa	87.3674	0.401191	0.243055	1.65061	0.0988174	0.999927	Up	150
AT1	Dctn4	2.2566	2.20437	1.33622	1.6497	0.0990038	0.999927	Up	151
AT1	Ube2e3	7.10273	1.21725	0.738168	1.64901	0.0991456	0.999927	Up	152
AT1	Srp54b	9.25054	1.00409	0.609493	1.64741	0.0994739	0.999927	Up	153
AT1	Gmfb	3.07784	1.89062	1.14843	1.64627	0.0997091	0.999927	Up	154
AT1	Mrpl39	1.29252	2.49433	1.52135	1.63955	0.101098	0.999927	Up	155
AT1	Fkbp11	2.3099	2.16434	1.32094	1.63848	0.101322	0.999927	Up	156
AT1	Rnpepl1	7.02417	1.16576	0.711784	1.63781	0.101462	0.999927	Up	157
AT1	Hook3	4.29186	1.88038	1.1514	1.63313	0.102442	0.999927	Up	158
AT1	Rnaset2a	13.459	0.898966	0.551325	1.63056	0.102984	0.999927	Up	159
AT1	Mvk	1.31754	2.50299	1.53754	1.62792	0.103542	0.999927	Up	160
AT1	Adam15	2.23192	2.17436	1.33706	1.62622	0.103902	0.999927	Up	161
AT1	Tex261	7.16893	1.25512	0.772014	1.62577	0.103999	0.999927	Up	162
AT1	Rsl1d1	7.50614	1.33763	0.823646	1.62404	0.104368	0.999927	Up	163
AT1	Tspan1	3.84819	1.64567	1.01721	1.61783	0.1057	0.999927	Up	164
AT1	Got2	5.43869	1.31532	0.814574	1.61474	0.106368	0.999927	Up	165
AT1	Tab2	3.08005	2.13404	1.32257	1.61355	0.106624	0.999927	Up	166
AT1	Sh2b3	1.31545	2.49233	1.55365	1.60418	0.108674	0.999927	Up	167
AT1	Myzap	3.19436	1.82346	1.13806	1.60226	0.109098	0.999927	Up	168
AT1	Krt7	185.236	0.285875	0.178716	1.5996	0.109686	0.999927	Up	169
AT1	Phyh	7.8817	1.08943	0.681366	1.59888	0.109846	0.999927	Up	170
AT1	Tef	8.64999	1.07924	0.675203	1.5984	0.109955	0.999927	Up	171
AT1	Phf23	3.06877	1.81569	1.1383	1.59509	0.110691	0.999927	Up	172
AT1	Pip4k2c	4.07937	1.7865	1.12035	1.59459	0.110803	0.999927	Up	173
AT1	Tom1l1	2.14539	2.13327	1.33863	1.59362	0.11102	0.999927	Up	174
AT1	Gstz1	1.2859	2.49289	1.56436	1.59356	0.111036	0.999927	Up	175
AT1	Spag7	12.1809	0.859937	0.539931	1.59268	0.111232	0.999927	Up	176
AT1	Lamp1	85.3852	0.386533	0.242695	1.59267	0.111235	0.999927	Up	177
AT1	Snhg9	2.22581	2.1051	1.323	1.59115	0.111576	0.999927	Up	178
AT1	Myl12a	283.63	0.284091	0.179137	1.58589	0.112764	0.999927	Up	179
AT1	2310022B05Rik	5.73958	1.35018	0.853158	1.58257	0.113519	0.999927	Up	180
AT1	Eif4h	11.8717	0.858631	0.543556	1.57966	0.114186	0.999927	Up	181
AT1	Etl4	2.95431	1.79786	1.13924	1.57813	0.114537	0.999927	Up	182
AT1	Atp1a1	12.691	0.84565	0.536357	1.57666	0.114875	0.999927	Up	183
AT1	Psmc1	15.7918	0.849598	0.539556	1.57463	0.115343	0.999927	Up	184
AT1	Npnt	21.02	0.667077	0.424547	1.57127	0.11612	0.999927	Up	185
AT1	Rnf139	2.9687	1.75181	1.1153	1.57072	0.116248	0.999927	Up	186
AT1	Bin1	2.96626	1.76757	1.12584	1.57	0.116415	0.999927	Up	187
AT1	Pwwp2b	3.76338	1.56523	0.999127	1.5666	0.117208	0.999927	Up	188
AT1	Vegfa	91.4233	0.447705	0.287421	1.55766	0.119314	0.999927	Up	189
AT1	Tsc22d3	15.2941	0.974553	0.626445	1.55569	0.119782	0.999927	Up	190
AT1	Gata6	7.72047	1.10501	0.710688	1.55485	0.119982	0.999927	Up	191
AT1	G6pdx	1.27532	2.47426	1.5922	1.55398	0.120188	0.999927	Up	192
AT1	Fam174b	45.4884	0.455076	0.293089	1.55269	0.120498	0.999927	Up	193
AT1	Mrps25	3.90631	1.72724	1.11332	1.55143	0.120798	0.999927	Up	194
AT1	Prx	1.26418	2.48137	1.60177	1.54914	0.121348	0.999927	Up	195
AT1	Nipal3	1.26418	2.48137	1.60177	1.54914	0.121348	0.999927	Up	196
AT1	Slc1a5	6.32974	1.20309	0.777548	1.54728	0.121795	0.999927	Up	197
AT1	Mgst3	22.5124	0.665545	0.430557	1.54578	0.122159	0.999927	Up	198
AT1	Ptprn	3.91435	1.56	1.01145	1.54234	0.122991	0.999927	Up	199
AT1	Anxa2	113.917	0.325246	0.21105	1.54108	0.123297	0.999927	Up	200
AT2	Mt2	175.833	1.74041	0.204636	8.50492	1.81727e-17	9.3971e-14	Up	1
AT2	Dbp	60.058	2.52705	0.381887	6.61726	3.65907e-11	9.46052e-08	Up	2
AT2	Lyz1	1954.34	0.912096	0.147104	6.20035	5.63366e-10	9.71056e-07	Up	3
AT2	Mt1	751.42	0.919659	0.166201	5.53341	3.14061e-08	4.06002e-05	Up	4
AT2	Scd1	4424.36	0.849317	0.161291	5.26573	1.39633e-07	0.000144408	Up	5
AT2	Chia1	231.373	0.835755	0.176087	4.74625	2.07219e-06	0.00178588	Up	6
AT2	Cyp2b10	28.0112	1.94274	0.431128	4.50617	6.60082e-06	0.00487612	Up	7
AT2	Atp1b1	599.819	0.636744	0.144239	4.41452	1.01234e-05	0.00654354	Up	8
AT2	Scgb3a1	436.115	6.46891	1.51925	4.25797	2.06292e-05	0.0106673	Up	9
AT2	Tef	27.0484	1.84392	0.453049	4.07002	4.70094e-05	0.0220987	Up	10
AT2	Ctsh	813.518	0.502057	0.126086	3.98185	6.83802e-05	0.0294662	Up	11
AT2	Per3	46.3649	1.42278	0.371761	3.82713	0.000129644	0.0515682	Up	12
AT2	Pmvk	138.062	0.768116	0.207504	3.70169	0.000214169	0.079105	Up	13
AT2	Napsa	1323.67	0.477768	0.129709	3.68337	0.000230169	0.0793469	Up	14
AT2	Selenbp1	427.108	0.587052	0.162484	3.61298	0.000302698	0.0978283	Up	15
AT2	Ankrd37	82.3336	1.06909	0.309426	3.45509	0.000550116	0.159392	Up	16
AT2	Gde1	307.439	0.524994	0.152964	3.43213	0.000598866	0.159392	Up	17
AT2	Npc2	4381.77	0.418044	0.122083	3.42426	0.000616483	0.159392	Up	18
AT2	Fabp5	1269.69	0.580283	0.170368	3.40607	0.000659058	0.162285	Up	19
AT2	Glul	117.755	0.776566	0.234606	3.31009	0.000932668	0.219219	Up	20
AT2	Scnn1a	65.3421	0.865192	0.267643	3.23264	0.00122652	0.275754	Up	21
AT2	AY036118	58.3888	1.02131	0.319318	3.1984	0.00138192	0.297747	Up	22
AT2	Tmem37	35.2145	1.09688	0.344786	3.18134	0.00146597	0.303221	Up	23
AT2	Retnla	83.4393	0.954135	0.307845	3.0994	0.00193916	0.385668	Up	24
AT2	Acta2	123.164	0.6418	0.208685	3.07546	0.00210181	0.402536	Up	25
AT2	Lcn2	548.101	0.435794	0.142514	3.0579	0.00222891	0.411632	Up	26
AT2	Ldha	270.299	0.480781	0.158526	3.03282	0.0024228	0.432011	Up	27
AT2	Reg3g	20.9143	6.2669	2.08602	3.00424	0.00266244	0.458915	Up	28
AT2	Nr1d1	47.9599	0.941156	0.318034	2.95929	0.00308347	0.514342	Up	29
AT2	Npnt	57.0431	0.801311	0.274825	2.91571	0.00354878	0.57346	Up	30
AT2	F3	20.7397	1.45944	0.50368	2.89756	0.0037608	0.579886	Up	31
AT2	Slc25a5	370.889	0.418435	0.144625	2.89325	0.00381283	0.579886	Up	32
AT2	Tmem213	7.42423	2.20908	0.776269	2.84577	0.00443043	NA	Up	33
AT2	Carkd	99.3769	0.622467	0.219755	2.83254	0.00461792	0.682265	Up	34
AT2	Krt19	48.2224	0.901225	0.32914	2.73812	0.00617908	0.862264	Up	35
AT2	Bhlhe40	38.2996	0.891244	0.326482	2.72984	0.0063365	0.862264	Up	36
AT2	Ier3	107.339	0.757003	0.278787	2.71535	0.00662064	0.877829	Up	37
AT2	Klhl29	8.74286	1.89174	0.698389	2.70872	0.0067543	NA	Up	38
AT2	Sult1a1	41.0633	0.891599	0.337774	2.63963	0.00829959	0.999805	Up	39
AT2	Mlana	8.5014	1.85087	0.703146	2.63226	0.00848178	NA	Up	40
AT2	Fxyd3	11.3629	1.73589	0.667006	2.60251	0.00925437	NA	Up	41
AT2	Eif4h	163.036	0.488673	0.188909	2.58682	0.0096866	0.999805	Up	42
AT2	Wfdc2	3048.58	0.369074	0.143764	2.56721	0.0102519	0.999805	Up	43
AT2	Trf	181.218	0.47934	0.188974	2.53654	0.0111955	0.999805	Up	44
AT2	Gramd2	27.3939	0.974415	0.384636	2.53334	0.011298	0.999805	Up	45
AT2	8430408G22Rik	57.6177	0.891331	0.354621	2.51347	0.0119549	0.999805	Up	46
AT2	Sftpb	8352.2	0.304371	0.121551	2.50406	0.0122779	0.999805	Up	47
AT2	Tspan4	22.3987	1.03698	0.415163	2.49778	0.0124975	0.999805	Up	48
AT2	Aqp5	305.66	0.413164	0.165658	2.49408	0.0126283	0.999805	Up	49
AT2	Dcxr	278.975	0.400116	0.160793	2.4884	0.0128319	0.999805	Up	50
AT2	Prdx6	448.595	0.458527	0.184326	2.48758	0.0128615	0.999805	Up	51
AT2	2810417H13Rik	8	2.04205	0.823453	2.47987	0.0131432	NA	Up	52
AT2	Bex4	496.094	0.348029	0.142263	2.44638	0.0144297	0.999805	Up	53
AT2	Herpud1	149.154	0.504586	0.206392	2.44479	0.0144936	0.999805	Up	54
AT2	Krt7	72.3819	0.652416	0.267385	2.43999	0.0146877	0.999805	Up	55
AT2	Ednrb	20.8655	1.09858	0.451553	2.43289	0.0149787	0.999805	Up	56
AT2	Tm7sf2	8.30156	1.67578	0.696472	2.40609	0.0161241	NA	Up	57
AT2	Ptgr1	30.8266	0.887696	0.369273	2.4039	0.0162212	0.999805	Up	58
AT2	Cbr2	3299.21	0.401808	0.167922	2.39282	0.0167195	0.999805	Up	59
AT2	Chst12	14.4771	1.25692	0.525831	2.39036	0.016832	NA	Up	60
AT2	Prmt8	32.7742	0.987564	0.413286	2.38954	0.0168695	0.999805	Up	61
AT2	Ubb	1611.39	0.28747	0.120754	2.38063	0.017283	0.999805	Up	62
AT2	Ubc	440.125	0.369443	0.157932	2.33926	0.0193222	0.999805	Up	63
AT2	Rgcc	196.502	0.52069	0.223503	2.32967	0.0198234	0.999805	Up	64
AT2	Rps12	1607.43	0.313308	0.135516	2.31196	0.02078	0.999805	Up	65
AT2	Serinc3	164.722	0.470261	0.204997	2.29399	0.0217911	0.999805	Up	66
AT2	Rpl7a	833.819	0.323041	0.140831	2.29382	0.0218011	0.999805	Up	67
AT2	Per2	3.60064	2.6278	1.15633	2.27253	0.0230544	NA	Up	68
AT2	Erdr1	14.1985	1.37223	0.610299	2.24845	0.0245472	NA	Up	69
AT2	Prss8	73.4931	0.556453	0.247811	2.24548	0.0247376	0.999805	Up	70
AT2	E130012A19Rik	24.6458	0.977878	0.43552	2.24531	0.024748	0.999805	Up	71
AT2	Ager	969.488	0.288646	0.129812	2.22357	0.0261777	0.999805	Up	72
AT2	Col3a1	25.8906	0.904854	0.409195	2.2113	0.0270149	0.999805	Up	73
AT2	Epn3	67.1313	0.582913	0.264094	2.20721	0.0272991	0.999805	Up	74
AT2	Tst	120.137	0.448153	0.2035	2.20222	0.0276494	0.999805	Up	75
AT2	Postn	7.68705	1.68119	0.764956	2.19776	0.0279664	NA	Up	76
AT2	Tmem116	27.6209	0.845555	0.385051	2.19596	0.0280948	0.999805	Up	77
AT2	Tdrp	3.75628	2.30182	1.05185	2.18835	0.0286438	NA	Up	78
AT2	Nr1d2	29.6108	0.863161	0.397452	2.17174	0.0298756	0.999805	Up	79
AT2	Ralgapa2	66.5688	0.553898	0.255608	2.16698	0.0302362	0.999805	Up	80
AT2	Mgst1	634.156	0.320041	0.147761	2.16594	0.0303158	0.999805	Up	81
AT2	Acot1	156.843	0.456525	0.211358	2.15997	0.0307753	0.999805	Up	82
AT2	Col1a1	14.3662	1.12744	0.523304	2.15446	0.0312039	NA	Up	83
AT2	Sgsm3	17.7721	1.03229	0.479236	2.15404	0.0312372	NA	Up	84
AT2	Wwp1	55.6242	0.602486	0.281427	2.14083	0.0322878	0.999805	Up	85
AT2	Pde4b	43.0459	0.714576	0.335882	2.12746	0.033382	0.999805	Up	86
AT2	Ifi30	97.6277	0.527494	0.248559	2.1222	0.0338205	0.999805	Up	87
AT2	Sord	77.5873	0.550187	0.261961	2.10026	0.0357058	0.999805	Up	88
AT2	1810010H24Rik	34.3099	0.719351	0.344742	2.08663	0.0369211	0.999805	Up	89
AT2	Wfdc21	21.0613	0.928047	0.446552	2.07825	0.0376863	0.999805	Up	90
AT2	Eif3l	67.3412	0.534492	0.259495	2.05974	0.0394237	0.999805	Up	91
AT2	Ly6c1	425.055	0.38676	0.188087	2.05628	0.0397553	0.999805	Up	92
AT2	P4ha2	26.8404	0.798481	0.388727	2.05409	0.0399667	0.999805	Up	93
AT2	Chil3	133.874	0.492207	0.240693	2.04496	0.0408589	0.999805	Up	94
AT2	Lgals3	228.06	0.346792	0.170064	2.03918	0.0414321	0.999805	Up	95
AT2	Gpx1	706.732	0.260078	0.128401	2.02551	0.0428147	0.999805	Up	96
AT2	St3gal5	32.7731	0.789489	0.390219	2.0232	0.0430528	0.999805	Up	97
AT2	Cers2	117.491	0.41182	0.204133	2.01741	0.0436523	0.999805	Up	98
AT2	Aldoa	336.527	0.295512	0.14654	2.0166	0.0437369	0.999805	Up	99
AT2	Rps20	1606.37	0.282698	0.140424	2.01317	0.0440968	0.999805	Up	100
AT2	Tpm2	40.7438	0.687125	0.344744	1.99315	0.0462455	0.999805	Up	101
AT2	Cxcl17	33.4133	0.675051	0.338894	1.99193	0.0463793	0.999805	Up	102
AT2	Ncl	162.211	0.365784	0.183972	1.98826	0.0467825	0.999805	Up	103
AT2	Ano1	5.57748	1.72057	0.86672	1.98515	0.047128	NA	Up	104
AT2	Rps12-ps3	293.898	0.349429	0.177022	1.97393	0.0483897	0.999805	Up	105
AT2	Dpep1	6.48032	1.65759	0.840922	1.97115	0.0487064	NA	Up	106
AT2	Gsk3b	128.889	0.401661	0.20406	1.96835	0.0490277	0.999805	Up	107
AT2	Calcrl	143.048	0.386694	0.196989	1.96303	0.0496431	0.999805	Up	108
AT2	Gins2	2.06118	2.88472	1.47455	1.95634	0.0504249	NA	Up	109
AT2	Rps10	1305.84	0.283295	0.144993	1.95385	0.0507186	0.999805	Up	110
AT2	Lmo7	109.669	0.44398	0.228102	1.94641	0.0516056	0.999805	Up	111
AT2	Rpn2	120.106	0.393235	0.202721	1.93978	0.0524063	0.999805	Up	112
AT2	Aqp3	1.97012	2.8523	1.47437	1.93459	0.0530408	NA	Up	113
AT2	Sparcl1	51.803	0.664649	0.343824	1.9331	0.0532233	0.999805	Up	114
AT2	Mettl7a1	247.41	0.320002	0.165684	1.9314	0.0534338	0.999805	Up	115
AT2	Fkbp2	230.582	0.320461	0.167119	1.91756	0.0551673	0.999805	Up	116
AT2	Igfbp7	585.505	0.331134	0.172708	1.9173	0.0551999	0.999805	Up	117
AT2	Rarres2	21.6757	0.851651	0.444537	1.91582	0.0553886	0.999805	Up	118
AT2	Myof	45.5909	0.577062	0.301835	1.91185	0.0558955	0.999805	Up	119
AT2	Acvrl1	112.087	0.453914	0.239019	1.89907	0.0575556	0.999805	Up	120
AT2	Manea	10.1096	1.17445	0.618767	1.89805	0.0576899	NA	Up	121
AT2	Card10	4.4571	1.76075	0.929627	1.89404	0.0582197	NA	Up	122
AT2	Wdr89	655.521	0.262834	0.138974	1.89125	0.0585911	0.999805	Up	123
AT2	Cdk18	3.22338	2.07038	1.09534	1.89016	0.0587362	NA	Up	124
AT2	Aldh3a1	7.63689	1.37335	0.728896	1.88416	0.0595438	NA	Up	125
AT2	Epas1	368.84	0.357787	0.189896	1.88412	0.0595484	0.999805	Up	126
AT2	Mpv17l2	60.6656	0.550721	0.293197	1.87833	0.0603358	0.999805	Up	127
AT2	Acer2	49.5582	0.583816	0.312083	1.87071	0.0613855	0.999805	Up	128
AT2	Adam19	65.2977	0.468382	0.251162	1.86486	0.0622011	0.999805	Up	129
AT2	Eln	35.0201	0.700785	0.377602	1.85588	0.0634701	0.999805	Up	130
AT2	Ppp1r12b	6.22466	1.44198	0.778121	1.85316	0.0638595	NA	Up	131
AT2	Srsf5	220.587	0.317754	0.171775	1.84983	0.0643381	0.999805	Up	132
AT2	Gm11744	28.2088	0.706158	0.382041	1.84838	0.064547	0.999805	Up	133
AT2	Gapdh	327.108	0.280062	0.152096	1.84135	0.0655704	0.999805	Up	134
AT2	Hbegf	12.4128	1.05381	0.57273	1.83997	0.0657727	NA	Up	135
AT2	Sptlc1	35.6524	0.662381	0.360282	1.83851	0.0659873	0.999805	Up	136
AT2	Gsto1	31.7606	0.80004	0.436737	1.83186	0.0669727	0.999805	Up	137
AT2	Lamp1	416.611	0.265297	0.145462	1.82382	0.068179	0.999805	Up	138
AT2	Slc1a5	59.4127	0.495745	0.27189	1.82333	0.0682537	0.999805	Up	139
AT2	Fkbp11	17.2656	0.9331	0.516212	1.80759	0.07067	NA	Up	140
AT2	Osgin1	16.4369	0.898509	0.499359	1.79932	0.0719675	NA	Up	141
AT2	Bpifb1	4.57944	3.42992	1.91312	1.79284	0.0729985	NA	Up	142
AT2	Gm42418	431.388	1.06559	0.594443	1.79259	0.0730386	0.999805	Up	143
AT2	Tbc1d1	5.74284	1.44497	0.80744	1.78957	0.0735225	NA	Up	144
AT2	Bnip3	85.1425	0.443724	0.248119	1.78835	0.0737197	0.999805	Up	145
AT2	Nceh1	44.7349	0.564007	0.31539	1.78828	0.0737303	0.999805	Up	146
AT2	Slc16a1	23.1833	0.728947	0.408194	1.78579	0.0741337	0.999805	Up	147
AT2	Lyplal1	3.13631	1.99926	1.12476	1.77749	0.0754869	NA	Up	148
AT2	Txnip	120.888	0.397644	0.223809	1.77671	0.075616	0.999805	Up	149
AT2	Btbd19	1.28007	3.21122	1.81348	1.77075	0.0766017	NA	Up	150
AT2	Stx12	71.6517	0.457497	0.258379	1.77064	0.0766202	0.999805	Up	151
AT2	Foxo3	38.1033	0.606531	0.343083	1.76788	0.0770806	0.999805	Up	152
AT2	S100a6	304.037	0.311725	0.176922	1.76193	0.0780807	0.999805	Up	153
AT2	Vdac1	76.1343	0.428542	0.243247	1.76176	0.0781103	0.999805	Up	154
AT2	Gdpd1	18.4138	0.89638	0.509051	1.76088	0.0782581	NA	Up	155
AT2	Cbx6	66.3464	0.463508	0.264731	1.75087	0.0799691	0.999805	Up	156
AT2	Slco2a1	150.273	0.34873	0.199353	1.7493	0.0802384	0.999805	Up	157
AT2	Tcf19	4.55675	1.60323	0.91686	1.74861	0.0803589	NA	Up	158
AT2	Slc7a5	5.28057	1.46638	0.840288	1.7451	0.0809682	NA	Up	159
AT2	Edn1	52.7243	0.521771	0.299534	1.74194	0.0815183	0.999805	Up	160
AT2	Hmga1	8.52822	1.17729	0.676082	1.74134	0.0816237	NA	Up	161
AT2	Sparc	242.346	0.300941	0.172828	1.74127	0.0816356	0.999805	Up	162
AT2	Tnip3	6.12225	1.54782	0.890056	1.73901	0.0820327	NA	Up	163
AT2	Pcna	37.3046	0.55759	0.323067	1.72592	0.084361	0.999805	Up	164
AT2	Car4	118.324	0.401822	0.233538	1.72059	0.0853257	0.999805	Up	165
AT2	Fstl1	9.19236	1.12244	0.653016	1.71885	0.0856416	NA	Up	166
AT2	Tff2	14.4313	6.70507	3.90878	1.71539	0.0862744	NA	Up	167
AT2	Fgfr3	24.4253	0.693607	0.404851	1.71324	0.0866686	0.999805	Up	168
AT2	Actn4	95.7413	0.376303	0.219827	1.71181	0.0869315	0.999805	Up	169
AT2	Tinagl1	77.8542	0.440802	0.257672	1.71071	0.0871345	0.999805	Up	170
AT2	Slc25a3	353.29	0.262558	0.153599	1.70938	0.0873813	0.999805	Up	171
AT2	Qsox1	26.3496	0.656742	0.384355	1.70869	0.0875087	0.999805	Up	172
AT2	Atraid	108.38	0.379272	0.222165	1.70716	0.0877923	0.999805	Up	173
AT2	Aig1	72.939	0.416038	0.243873	1.70596	0.0880149	0.999805	Up	174
AT2	Zfos1	166.607	0.315441	0.184916	1.70586	0.0880343	0.999805	Up	175
AT2	Tex11	12.0159	0.985532	0.57983	1.69969	0.0891887	NA	Up	176
AT2	Adcy5	1.19685	3.12862	1.84411	1.69655	0.0897817	NA	Up	177
AT2	Nfia	87.2481	0.402655	0.238052	1.69146	0.0907489	0.999805	Up	178
AT2	Apoc1	338.02	0.332166	0.197311	1.68347	0.0922849	0.999805	Up	179
AT2	Fmo2	41.6709	0.517059	0.307216	1.68304	0.0923666	0.999805	Up	180
AT2	Gm3839	9.29455	1.07999	0.644669	1.67526	0.0938834	NA	Up	181
AT2	Xpc	18.5521	0.744144	0.448374	1.65965	0.0969847	NA	Up	182
AT2	Mtmr12	7.54636	1.15721	0.699199	1.65506	0.0979132	NA	Up	183
AT2	Cnn1	11.539	0.952231	0.577002	1.65031	0.0988803	NA	Up	184
AT2	Epb41l4aos	24.645	0.63951	0.387756	1.64926	0.0990946	0.999805	Up	185
AT2	Ppp1r3c	8.94637	1.09418	0.664609	1.64635	0.0996911	NA	Up	186
AT2	Rdx	130.245	0.35422	0.215656	1.64252	0.100482	0.999805	Up	187
AT2	Lta	1.13936	3.04933	1.86255	1.63718	0.101594	NA	Up	188
AT2	Piwil4	9.65209	1.10895	0.681221	1.62788	0.103549	NA	Up	189
AT2	Cdc42bpa	68.3235	0.42088	0.258648	1.62723	0.103688	0.999805	Up	190
AT2	Sult1d1	1.68652	2.58127	1.5876	1.6259	0.103971	NA	Up	191
AT2	Pten	40.5299	0.570563	0.351227	1.62448	0.104273	0.999805	Up	192
AT2	Hdac11	5.77862	1.30346	0.802594	1.62406	0.104363	NA	Up	193
AT2	Gas6	221.949	0.291323	0.179886	1.61949	0.105342	0.999805	Up	194
AT2	Klf15	17.5402	0.783846	0.48588	1.61325	0.10669	NA	Up	195
AT2	Smim1	96.8519	0.357847	0.222002	1.61191	0.106982	0.999805	Up	196
AT2	Col4a3	11.6139	0.973624	0.604688	1.61013	0.10737	NA	Up	197
AT2	Zfyve21	43.0137	0.512525	0.318717	1.60809	0.107816	0.999805	Up	198
AT2	Amd1	43.7044	0.51652	0.321572	1.60623	0.108223	0.999805	Up	199
AT2	Icam2	201.208	0.304752	0.19036	1.60093	0.109392	0.999805	Up	200
Baso	Mt1	65.6446	5.02964	1.24844	4.02874	5.60756e-05	0.594626	Up	1
Baso	Ecm1	17.1312	4.13473	1.11953	3.69328	0.000221377	0.835205	Up	2
Baso	Pf4	33.5778	3.2965	0.896598	3.67668	0.00023629	0.835205	Up	3
Baso	Gm42418	44.3528	2.71809	0.777456	3.49613	0.000472059	0.997824	Up	4
Baso	Mt2	42.8571	7.05205	2.0404	3.45621	0.000547827	0.997824	Up	5
Baso	Npm1	36.9927	1.36006	0.417765	3.25557	0.00113163	0.997824	Up	6
Baso	C1qb	23.7934	5.7036	1.80822	3.15426	0.00160905	0.997824	Up	7
Baso	Ltc4s	9.53628	3.90878	1.24726	3.1339	0.00172499	0.997824	Up	8
Baso	Itga6	7.93795	3.60438	1.16259	3.10031	0.00193316	0.997824	Up	9
Baso	Thbs1	9.63638	3.33824	1.12584	2.9651	0.00302583	0.997824	Up	10
Baso	Laptm5	44.4099	1.3302	0.466264	2.8529	0.00433228	0.997824	Up	11
Baso	Ms4a8a	2.73441	5.12117	1.88447	2.71757	0.00657627	0.997824	Up	12
Baso	F5	4.4466	4.78581	1.77771	2.69212	0.00710003	0.997824	Up	13
Baso	Cfp	20.5381	2.37523	0.917159	2.58977	0.00960396	0.997824	Up	14
Baso	Rps2	116.934	1.02202	0.395234	2.58586	0.00971357	0.997824	Up	15
Baso	Cstb	25.2156	1.97449	0.767082	2.57403	0.0100522	0.997824	Up	16
Baso	Slc7a11	17.9298	6.74843	2.63117	2.5648	0.0103236	0.997824	Up	17
Baso	Wfdc17	35.2277	1.99975	0.783011	2.55392	0.0106517	0.997824	Up	18
Baso	Lipa	5.61183	4.08795	1.61517	2.53097	0.0113749	0.997824	Up	19
Baso	Ltbp1	3.95981	3.76599	1.50886	2.49592	0.0125631	0.997824	Up	20
Baso	Fcna	2.3311	4.89454	1.96355	2.49269	0.0126778	0.997824	Up	21
Baso	Foxn3	1.91389	4.55411	1.83588	2.48061	0.0131157	0.997824	Up	22
Baso	Gm10116	7.88451	2.35071	0.953179	2.46618	0.0136564	0.997824	Up	23
Baso	Hsp90ab1	38.6522	1.1195	0.455512	2.45768	0.0139837	0.997824	Up	24
Baso	Prdx1	56.7325	1.65713	0.6764	2.44993	0.0142884	0.997824	Up	25
Baso	Ptgs1	3.3249	4.38852	1.79188	2.44912	0.0143204	0.997824	Up	26
Baso	Ftl1	520.795	0.991989	0.407625	2.43358	0.0149503	0.997824	Up	27
Baso	Adgre1	5.45675	3.12771	1.30354	2.3994	0.0164218	0.997824	Up	28
Baso	Pycard	13.4285	2.03581	0.84853	2.39923	0.0164298	0.997824	Up	29
Baso	Fn1	90.24	4.01554	1.69109	2.37453	0.0175714	0.997824	Up	30
Baso	Fam46a	12.4106	2.043	0.875699	2.33299	0.0196485	0.997824	Up	31
Baso	Ubxn1	13.4787	1.54196	0.66767	2.30947	0.0209176	0.997824	Up	32
Baso	Zeb2	9.79159	1.81354	0.786654	2.30539	0.0211447	0.997824	Up	33
Baso	Hmox1	26.0613	5.88806	2.57234	2.28899	0.0220798	0.997824	Up	34
Baso	Eef1a1	253.224	0.722153	0.316453	2.28203	0.0224878	0.997824	Up	35
Baso	Nme2	4.23541	2.70691	1.18717	2.28014	0.0225991	0.997824	Up	36
Baso	Comt	6.71851	2.37488	1.05429	2.25258	0.0242856	0.997824	Up	37
Baso	Cxcl16	1.69458	4.27008	1.89921	2.24835	0.024554	0.997824	Up	38
Baso	Rps20	96.6828	0.85147	0.379431	2.24407	0.0248278	0.997824	Up	39
Baso	Gnb2l1	49.22	0.9519	0.428417	2.2219	0.0262899	0.997824	Up	40
Baso	Ctss	17.6485	1.69543	0.765163	2.21577	0.0267071	0.997824	Up	41
Baso	Rbm4b	5.15951	2.26527	1.02642	2.20697	0.0273163	0.997824	Up	42
Baso	Renbp	1.79234	4.26997	1.93889	2.20228	0.0276454	0.997824	Up	43
Baso	Gse1	1.66667	4.23378	1.92805	2.19589	0.0281	0.997824	Up	44
Baso	Nupr1	20.7373	3.72421	1.71295	2.17415	0.0296941	0.997824	Up	45
Baso	Ccl24	1.69947	4.4423	2.0739	2.14201	0.0321931	0.997824	Up	46
Baso	Dpep2	2.77702	4.11684	1.92388	2.13986	0.0323657	0.997824	Up	47
Baso	Plxdc2	2.77702	4.11684	1.92388	2.13986	0.0323657	0.997824	Up	48
Baso	Gngt2	16.4371	1.57143	0.73509	2.13773	0.0325386	0.997824	Up	49
Baso	F10	2.5213	3.94955	1.85076	2.13402	0.032841	0.997824	Up	50
Baso	Sdf2l1	2.35078	3.87112	1.8146	2.13332	0.0328985	0.997824	Up	51
Baso	Garnl3	1.7553	4.49129	2.11683	2.12171	0.0338622	0.997824	Up	52
Baso	Sqstm1	11.3614	1.57337	0.748344	2.10247	0.0355124	0.997824	Up	53
Baso	Myof	1.55001	4.12777	1.96369	2.10205	0.0355492	0.997824	Up	54
Baso	Cryl1	2.32939	3.82206	1.82628	2.09281	0.0363665	0.997824	Up	55
Baso	Trim29	2.00427	4.44028	2.12303	2.09148	0.0364847	0.997824	Up	56
Baso	C1qc	14.067	4.75679	2.27859	2.08761	0.0368332	0.997824	Up	57
Baso	Alox15	27.543	1.86687	0.894463	2.08713	0.036876	0.997824	Up	58
Baso	Rps12	102.806	0.79129	0.386406	2.04782	0.0405779	0.997824	Up	59
Baso	Ptpn1	8.14579	1.78926	0.878816	2.03598	0.0417521	0.997824	Up	60
Baso	Ccdc50	4.00297	2.62089	1.28744	2.03574	0.0417766	0.997824	Up	61
Baso	Ptgis	4.47875	2.89538	1.42301	2.03469	0.0418819	0.997824	Up	62
Baso	Blvrb	11.3551	1.56984	0.776923	2.02059	0.0433223	0.997824	Up	63
Baso	9930111J21Rik2	2.16679	3.70122	1.84319	2.00805	0.0446376	0.997824	Up	64
Baso	Cxx1a	3.87654	2.36206	1.18725	1.98952	0.0466436	0.997824	Up	65
Baso	BC005537	11.0461	1.55754	0.786667	1.97993	0.0477117	0.997824	Up	66
Baso	Rpl36a	83.4689	0.731746	0.371568	1.96934	0.0489135	0.997824	Up	67
Baso	Ankrd37	5.65947	2.21866	1.12923	1.96475	0.0494427	0.997824	Up	68
Baso	Abcc5	1.83178	4.28678	2.21913	1.93174	0.0533917	0.997824	Up	69
Baso	Gsto1	4.79923	2.51407	1.31016	1.9189	0.0549975	0.997824	Up	70
Baso	Hspe1	9.62491	1.4461	0.754442	1.91678	0.055266	0.997824	Up	71
Baso	1810026J23Rik	1.27976	3.93269	2.05707	1.91179	0.0559035	0.997824	Up	72
Baso	Rpl12	59.4714	0.84503	0.447398	1.88876	0.0589234	0.997824	Up	73
Baso	Atpif1	19.5095	1.13652	0.602797	1.8854	0.0593757	0.997824	Up	74
Baso	Hspa4l	1.41033	4.17979	2.22764	1.87633	0.0606097	0.997824	Up	75
Baso	Rps17	91.2867	0.816743	0.435839	1.87396	0.0609366	0.997824	Up	76
Baso	Sult1a1	2.57577	3.12125	1.66931	1.86978	0.061514	0.997824	Up	77
Baso	Adam15	4.88858	2.02953	1.08895	1.86375	0.0623571	0.997824	Up	78
Baso	Icam2	21.9946	1.16807	0.627409	1.86174	0.0626402	0.997824	Up	79
Baso	Acly	4.96898	1.90216	1.02245	1.86041	0.0628281	0.997824	Up	80
Baso	Wnt2	1.81114	4.51199	2.42642	1.85953	0.0629526	0.997824	Up	81
Baso	Fkbp2	6.17774	1.77629	0.959812	1.85066	0.0642182	0.997824	Up	82
Baso	4930455G09Rik	1.43824	4.20626	2.28272	1.84265	0.0653803	0.997824	Up	83
Baso	Ucp2	22.4868	1.05859	0.581205	1.82137	0.0685504	0.997824	Up	84
Baso	Ttc1	2.93641	2.57833	1.41849	1.81766	0.0691162	0.997824	Up	85
Baso	Khk	3.57775	2.49573	1.37322	1.81743	0.0691505	0.997824	Up	86
Baso	Mapk8	1.19352	3.8189	2.10446	1.81467	0.0695748	0.997824	Up	87
Baso	Nfkbia	24.4193	1.13192	0.627572	1.80364	0.0712874	0.997824	Up	88
Baso	Senp1	1.29128	3.80796	2.11259	1.80251	0.0714651	0.997824	Up	89
Baso	Frrs1	1.7287	3.2714	1.82897	1.78865	0.073671	0.997824	Up	90
Baso	Saa3	10.646	6.99024	3.91211	1.78682	0.0739665	0.997824	Up	91
Baso	mt-Nd3	14.3368	1.1402	0.63857	1.78555	0.0741719	0.997824	Up	92
Baso	Sppl3	2.11759	3.38619	1.89867	1.78345	0.0745124	0.997824	Up	93
Baso	Tep1	2.4312	3.0331	1.70698	1.77688	0.0755883	0.997824	Up	94
Baso	Fam53b	2.80086	2.43624	1.37701	1.76923	0.0768562	0.997824	Up	95
Baso	Mrpl52	8.88335	1.3523	0.766084	1.76521	0.0775285	0.997824	Up	96
Baso	Hspa8	66.9235	0.679526	0.386024	1.76032	0.078353	0.997824	Up	97
Baso	Serpinb10	1.63865	4.37024	2.48647	1.75761	0.0788138	0.997824	Up	98
Baso	Psmb4	8.00973	1.36794	0.779116	1.75576	0.0791295	0.997824	Up	99
Baso	Fth1	291.766	0.718905	0.410223	1.75248	0.0796921	0.997824	Up	100
Baso	Stxbp3	2.27023	2.86077	1.6332	1.75164	0.0798359	0.997824	Up	101
Baso	Gclm	8.04685	1.57194	0.897729	1.75102	0.0799433	0.997824	Up	102
Baso	Arfgap1	1.73969	3.20569	1.83103	1.75076	0.079988	0.997824	Up	103
Baso	Eef2	75.3742	0.654341	0.374129	1.74897	0.0802962	0.997824	Up	104
Baso	Tmem186	1.1656	3.76789	2.15711	1.74673	0.080684	0.997824	Up	105
Baso	C1qa	9.46398	6.82115	3.91277	1.74331	0.0812803	0.997824	Up	106
Baso	Phlda3	3.30571	2.48173	1.42571	1.7407	0.081737	0.997824	Up	107
Baso	Timp2	18.0707	1.25788	0.724234	1.73684	0.082415	0.997824	Up	108
Baso	Tgif1	1.23295	3.73986	2.15746	1.73345	0.083015	0.997824	Up	109
Baso	Nsf	1.23295	3.73986	2.15746	1.73345	0.083015	0.997824	Up	110
Baso	Prelid1	16.3018	0.968242	0.558761	1.73284	0.0831248	0.997824	Up	111
Baso	Evi5	5.15099	1.89028	1.10171	1.71577	0.0862045	0.997824	Up	112
Baso	Ahnak	9.34628	1.47431	0.859326	1.71565	0.0862255	0.997824	Up	113
Baso	Csf2ra	4.85946	1.73827	1.01627	1.71043	0.0871856	0.997824	Up	114
Baso	Axin2	1.10727	3.69516	2.16284	1.70847	0.0875485	0.997824	Up	115
Baso	St5	1.59349	3.17826	1.86183	1.70706	0.0878107	0.997824	Up	116
Baso	Gbp7	2.53396	2.86355	1.67816	1.70637	0.0879393	0.997824	Up	117
Baso	Cebpb	26.1088	1.08868	0.640264	1.70036	0.0890632	0.997824	Up	118
Baso	Commd5	1.84734	3.19433	1.88544	1.69421	0.0902254	0.997824	Up	119
Baso	Ednrb	7.21569	1.81141	1.07126	1.69091	0.0908531	0.997824	Up	120
Baso	Gapdh	41.0324	0.75321	0.446199	1.68806	0.0914004	0.997824	Up	121
Baso	Gde1	1.55568	3.13456	1.87131	1.67506	0.093922	0.997824	Up	122
Baso	F7	1.27727	3.95136	2.36433	1.67124	0.0946743	0.997824	Up	123
Baso	S100a4	6.86933	1.61003	0.966966	1.66503	0.0959065	0.997824	Up	124
Baso	Fam234a	2.90619	2.31795	1.39346	1.66345	0.0962221	0.997824	Up	125
Baso	Trim25	1.58413	3.12395	1.88513	1.65716	0.0974878	0.997824	Up	126
Baso	Cpd	2.16758	2.66911	1.61193	1.65585	0.0977516	0.997824	Up	127
Baso	Acox1	1.83797	3.13923	1.90316	1.64948	0.0990487	0.997824	Up	128
Baso	Msr1	1.46616	4.21258	2.55855	1.64647	0.0996664	0.997824	Up	129
Baso	Eif4h	9.3345	1.20965	0.73516	1.64542	0.099883	0.997824	Up	130
Baso	Cmklr1	1.12367	3.84882	2.33977	1.64496	0.0999784	0.997824	Up	131
Baso	Slc11a1	1.12367	3.84882	2.33977	1.64496	0.0999784	0.997824	Up	132
Baso	Rplp1	241.075	0.46595	0.283319	1.64461	0.10005	0.997824	Up	133
Baso	Anxa4	3.50225	2.22607	1.35419	1.64384	0.100209	0.997824	Up	134
Baso	Rftn1	1.55621	3.07921	1.87397	1.64315	0.100353	0.997824	Up	135
Baso	Krt8	1.24282	3.94878	2.40564	1.64147	0.1007	0.997824	Up	136
Baso	Clec4e	5.13416	2.03968	1.24514	1.63812	0.101397	0.997824	Up	137
Baso	Mgst3	3.00395	2.30315	1.40642	1.6376	0.101506	0.997824	Up	138
Baso	Fam76b	1.09576	3.80412	2.35048	1.61844	0.105567	0.997824	Up	139
Baso	Wdr89	57.4156	0.646509	0.40217	1.60755	0.107933	0.997824	Up	140
Baso	Fabp4	7.83604	3.86831	2.41346	1.6028	0.108978	0.997824	Up	141
Baso	Atp1a1	7.11334	1.43767	0.897188	1.60242	0.109062	0.997824	Up	142
Baso	Cxcl2	6.48106	6.25698	3.91563	1.59795	0.110055	0.997824	Up	143
Baso	Ankrd39	1.47933	3.03144	1.90222	1.59363	0.111019	0.997824	Up	144
Baso	Slpi	208.503	2.19487	1.37765	1.5932	0.111115	0.997824	Up	145
Baso	Csf1r	2.84973	2.51912	1.58141	1.59296	0.111169	0.997824	Up	146
Baso	Pkp3	3.9812	2.09637	1.31603	1.59295	0.111171	0.997824	Up	147
Baso	Itfg2	1.02103	3.56001	2.23877	1.59016	0.111799	0.997824	Up	148
Baso	Esd	14.1169	1.17221	0.737446	1.58956	0.111934	0.997824	Up	149
Baso	Guca1a	1.51376	3.20874	2.03065	1.58015	0.114072	0.997824	Up	150
Baso	Sdc3	3.61958	2.63672	1.671	1.57792	0.114583	0.997824	Up	151
Baso	Rpl23	204.806	0.489472	0.310522	1.57629	0.11496	0.997824	Up	152
Baso	Dctpp1	2.03288	2.71768	1.72471	1.57573	0.115087	0.997824	Up	153
Baso	Nucb1	8.39768	1.1991	0.762694	1.5722	0.115905	0.997824	Up	154
Baso	Krt5	5.95088	6.15546	3.91627	1.57176	0.116005	0.997824	Up	155
Baso	Smarce1	3.39104	1.83181	1.17014	1.56546	0.117475	0.997824	Up	156
Baso	Cd5l	5.32175	5.99521	3.84661	1.55857	0.119098	0.997824	Up	157
Baso	Ssbp4	4.42522	1.60805	1.03261	1.55727	0.119405	0.997824	Up	158
Baso	Plekhm3	0.990618	3.54072	2.27448	1.55672	0.119537	0.997824	Up	159
Baso	Tmem140	4.78971	1.5637	1.00616	1.55414	0.120152	0.997824	Up	160
Baso	Rpl6l	14.034	0.900901	0.584463	1.54142	0.123215	0.997824	Up	161
Baso	Grn	11.1354	1.20141	0.784601	1.53124	0.125711	0.997824	Up	162
Baso	Cfh	3.72078	2.04068	1.33578	1.52771	0.126584	0.997824	Up	163
Baso	2610037D02Rik	1.45141	2.98341	1.95444	1.52648	0.126891	0.997824	Up	164
Baso	Shtn1	1.00951	3.68341	2.41647	1.52429	0.127435	0.997824	Up	165
Baso	Hat1	1.48886	3.09524	2.03084	1.52412	0.12748	0.997824	Up	166
Baso	Qars	1.63996	3.19196	2.09554	1.52321	0.127705	0.997824	Up	167
Baso	Tpt1	170.478	0.571944	0.376054	1.52091	0.128283	0.997824	Up	168
Baso	Txnrd1	2.76557	2.24656	1.48058	1.51735	0.129178	0.997824	Up	169
Baso	Mcm7	1.4399	3.09331	2.04831	1.51018	0.130998	0.997824	Up	170
Baso	Gpx2	1.5422	3.1823	2.11074	1.50767	0.131639	0.997824	Up	171
Baso	Flnb	2.74545	2.42376	1.61002	1.50543	0.132214	0.997824	Up	172
Baso	Ctdnep1	1.41164	2.90926	1.93443	1.50394	0.132597	0.997824	Up	173
Baso	F3	2.11225	2.62582	1.74616	1.50377	0.132641	0.997824	Up	174
Baso	Apoe	41.7369	1.18567	0.789063	1.50263	0.132935	0.997824	Up	175
Baso	Ehd1	9.11778	1.08023	0.7196	1.50115	0.133316	0.997824	Up	176
Baso	Krt15	4.91595	5.88172	3.91825	1.50111	0.133328	0.997824	Up	177
Baso	Sort1	1.43955	2.95889	1.97125	1.50102	0.13335	0.997824	Up	178
Baso	Marveld1	1.38319	2.92017	1.94694	1.49988	0.133647	0.997824	Up	179
Baso	Dbp	2.02299	2.73554	1.83338	1.49208	0.135678	0.997824	Up	180
Baso	Tagln2	55.0006	0.592722	0.397326	1.49178	0.135758	0.997824	Up	181
Baso	Cenpu	1.06046	3.46879	2.32558	1.49158	0.13581	0.997824	Up	182
Baso	Bhlhe40	2.83358	2.016	1.35219	1.49092	0.135983	0.997824	Up	183
Baso	Rps8	225.054	0.514668	0.345407	1.49003	0.136215	0.997824	Up	184
Baso	Plk2	1.35278	2.90896	1.9528	1.48964	0.136319	0.997824	Up	185
Baso	Rabl6	1.39059	2.95828	1.98621	1.48941	0.13638	0.997824	Up	186
Baso	Rps12-ps3	20.8717	0.829172	0.557661	1.48687	0.137048	0.997824	Up	187
Baso	Gata6	0.979102	3.65607	2.46491	1.48325	0.138009	0.997824	Up	188
Baso	Rpl8	156.629	0.500207	0.338185	1.4791	0.139115	0.997824	Up	189
Baso	Aimp1	5.90571	1.28725	0.870783	1.47827	0.139335	0.997824	Up	190
Baso	Gm16104	1.00702	3.69975	2.50428	1.47737	0.139576	0.997824	Up	191
Baso	Timm10	1.38372	2.8547	1.93725	1.47359	0.140593	0.997824	Up	192
Baso	Rpl10	215.216	0.52426	0.356843	1.46916	0.141789	0.997824	Up	193
Baso	Rab7b	1.46043	2.87734	1.96495	1.46433	0.143104	0.997824	Up	194
Baso	Pdcd4	5.16385	1.36405	0.93276	1.46238	0.143638	0.997824	Up	195
Baso	Frmd4b	1.33476	2.85497	1.95286	1.46194	0.143757	0.997824	Up	196
Baso	Gmnn	1.33476	2.85497	1.95286	1.46194	0.143757	0.997824	Up	197
Baso	Engase	1.20743	3.93707	2.69926	1.45857	0.144683	0.997824	Up	198
Baso	Crybg3	0.904373	3.38898	2.33845	1.44925	0.147269	0.997824	Up	199
Baso	Cog2	0.904373	3.38898	2.33845	1.44925	0.147269	0.997824	Up	200
Bcells	Ankrd37	321.829	0.913012	0.206045	4.43114	9.37366e-06	0.00338815	Up	1
Bcells	Rbm3	1651.32	0.608101	0.139076	4.37243	1.2287e-05	0.00338815	Up	2
Bcells	Adm	20.8329	1.83175	0.464163	3.94636	7.93479e-05	NA	Up	3
Bcells	Ahnak2	25.8034	2.1576	0.55968	3.85507	0.000115699	NA	Up	4
Bcells	Plp2	296.187	0.622087	0.161851	3.84358	0.000121252	NA	Up	5
Bcells	Gm15228	12.1157	2.95034	0.768774	3.83773	0.000124179	NA	Up	6
Bcells	Zbtb32	33.3202	1.86453	0.48628	3.83427	0.000125936	NA	Up	7
Bcells	Erdr1	61.6936	1.42209	0.371934	3.82351	0.000131567	NA	Up	8
Bcells	Rps12-ps3	975.832	0.557068	0.151761	3.67069	0.000241892	0.0420845	Up	9
Bcells	Wdr89	3331.52	0.400997	0.111054	3.61081	0.000305236	0.0420845	Up	10
Bcells	2810417H13Rik	35.083	1.39504	0.388456	3.59126	0.000329089	NA	Up	11
Bcells	1810046K07Rik	15.5958	2.24743	0.634516	3.54195	0.000397175	NA	Up	12
Bcells	Dbp	71.6992	0.899235	0.256743	3.50247	0.000460963	NA	Up	13
Bcells	Rps12	5182.81	0.488567	0.139903	3.49217	0.000479111	0.0532196	Up	14
Bcells	Edn1	140.919	0.984919	0.291591	3.37775	0.000730822	NA	Up	15
Bcells	Ryr1	74.2946	0.842889	0.251668	3.34921	0.000810419	NA	Up	16
Bcells	Zfp811	2.68398	5.4606	1.67194	3.26602	0.00109071	NA	Up	17
Bcells	Ass1	103.583	0.8477	0.271035	3.12764	0.00176217	NA	Up	18
Bcells	Eef1a1	13894.6	0.4119	0.137365	2.99859	0.00271233	0.187498	Up	19
Bcells	S100a6	970.346	1.62165	0.540955	2.99775	0.00271983	0.187498	Up	20
Bcells	Vars	361.053	0.439756	0.148443	2.96245	0.003052	0.198021	Up	21
Bcells	Krt222	28.523	1.2257	0.416908	2.93997	0.00328247	NA	Up	22
Bcells	Rps2	8091.91	0.312605	0.10716	2.91718	0.00353216	0.207304	Up	23
Bcells	Rpsa	7017.42	0.331451	0.113754	2.91377	0.00357097	0.207304	Up	24
Bcells	Rplp1	9997.77	0.348915	0.12113	2.8805	0.00397048	0.214256	Up	25
Bcells	Chil3	390.025	0.480655	0.172222	2.7909	0.00525609	0.252064	Up	26
Bcells	Ly6a	2355.74	0.43582	0.157366	2.76946	0.00561485	0.25623	Up	27
Bcells	Mt2	29.3971	1.17702	0.425225	2.768	0.00564019	NA	Up	28
Bcells	Stoml1	91.6231	0.601636	0.220205	2.73216	0.00629197	NA	Up	29
Bcells	Rplp0	11069.5	0.298181	0.109616	2.72025	0.00652333	0.25623	Up	30
Bcells	Srsf5	698.579	0.383104	0.142445	2.68948	0.00715633	0.25623	Up	31
Bcells	Gpr137b	62.4825	0.777404	0.289076	2.68927	0.0071608	NA	Up	32
Bcells	Gnb2l1	2823.56	0.356955	0.132826	2.68739	0.00720139	0.25623	Up	33
Bcells	Nme2	269.526	0.487996	0.181997	2.68134	0.00733284	NA	Up	34
Bcells	Gm10073	697.895	0.418211	0.156861	2.66612	0.00767317	0.258095	Up	35
Bcells	Mid1	19.042	1.22775	0.461594	2.6598	0.00781873	NA	Up	36
Bcells	St5	44.5117	0.94926	0.357344	2.65643	0.00789722	NA	Up	37
Bcells	Rps20	8984.71	0.310138	0.117142	2.64753	0.00810818	0.263039	Up	38
Bcells	Timp3	110.148	0.723826	0.278116	2.6026	0.00925188	NA	Up	39
Bcells	Slco2a1	224.247	0.549384	0.211311	2.59988	0.00932554	NA	Up	40
Bcells	Il3ra	36.1492	0.9024	0.34842	2.58998	0.0095982	NA	Up	41
Bcells	Kcnn4	42.2838	0.829242	0.320371	2.58838	0.00964276	NA	Up	42
Bcells	Scgb3a1	44.4558	0.980522	0.380213	2.57887	0.00991236	NA	Up	43
Bcells	Ppp1r14b	121.742	0.634018	0.246057	2.57671	0.00997447	NA	Up	44
Bcells	Sox5	7.27833	2.06724	0.806599	2.56291	0.0103799	NA	Up	45
Bcells	Rplp2	10339.1	0.29765	0.11663	2.55209	0.010708	0.310267	Up	46
Bcells	Cirbp	802.806	0.515572	0.202328	2.5482	0.0108281	0.310267	Up	47
Bcells	Rpl30	5252.74	0.29119	0.114789	2.53673	0.0111893	0.310267	Up	48
Bcells	Eef2	4160.79	0.317881	0.125408	2.53478	0.0112518	0.310267	Up	49
Bcells	Ace	229.2	0.474964	0.187526	2.53279	0.011316	NA	Up	50
Bcells	Irgc1	29.9652	0.917902	0.362944	2.52904	0.0114374	NA	Up	51
Bcells	Igfbp2	24.7813	1.22957	0.490125	2.50869	0.0121181	NA	Up	52
Bcells	Ece1	99.5876	0.616839	0.245925	2.50824	0.0121335	NA	Up	53
Bcells	Tmem154	29.0092	0.993023	0.396036	2.50741	0.0121621	NA	Up	54
Bcells	Tbc1d7	20.2857	1.14747	0.45884	2.50081	0.012391	NA	Up	55
Bcells	Rps21	5082.49	0.3013	0.120599	2.49837	0.0124766	0.324552	Up	56
Bcells	Anks1b	7.90514	1.76617	0.710096	2.48722	0.0128745	NA	Up	57
Bcells	Tspan4	39.4018	0.848443	0.341917	2.48143	0.0130858	NA	Up	58
Bcells	Calcrl	385.535	0.384773	0.155899	2.46809	0.0135835	0.329545	Up	59
Bcells	Bpifa1	15.5181	1.49279	0.605308	2.46617	0.0136568	NA	Up	60
Bcells	Clstn1	61.6619	0.703748	0.286239	2.45861	0.0139478	NA	Up	61
Bcells	Sox7	46.7976	0.770683	0.313533	2.45806	0.0139691	NA	Up	62
Bcells	Gm29019	2.16117	4.09196	1.67577	2.44184	0.0146127	NA	Up	63
Bcells	Anxa2	420.338	0.414234	0.169825	2.43918	0.0147207	0.329545	Up	64
Bcells	Aldoa	1201.54	0.268886	0.110584	2.43151	0.0150361	0.329545	Up	65
Bcells	Bgn	104.036	0.738929	0.304676	2.4253	0.0152959	NA	Up	66
Bcells	Il9r	32.4399	0.888676	0.366425	2.42526	0.0152976	NA	Up	67
Bcells	Cacna1s	10.6213	1.55922	0.643312	2.42373	0.015362	NA	Up	68
Bcells	Rpl10a	6289.29	0.26915	0.111171	2.42105	0.0154759	0.329545	Up	69
Bcells	Nxpe2	26.3456	0.917945	0.379394	2.4195	0.0155417	NA	Up	70
Bcells	Rpl23	10468.1	0.264108	0.109218	2.41818	0.0155983	0.329545	Up	71
Bcells	Tpm2	108.34	0.54476	0.225489	2.41591	0.0156961	NA	Up	72
Bcells	Rpl12	5292.05	0.267099	0.111052	2.40518	0.0161643	0.329545	Up	73
Bcells	Bcl2	608.307	0.320449	0.133853	2.39404	0.016664	0.329545	Up	74
Bcells	Vim	1402.45	0.429787	0.179576	2.39334	0.0166958	0.329545	Up	75
Bcells	Cd200	443.104	0.36546	0.153165	2.38606	0.01703	0.329545	Up	76
Bcells	Cnn1	29.1724	0.989949	0.415476	2.38269	0.0171869	NA	Up	77
Bcells	Hnrnpd	243.671	0.464336	0.195803	2.37144	0.0177189	NA	Up	78
Bcells	Ddx21	206.769	0.413174	0.174253	2.37112	0.0177344	NA	Up	79
Bcells	Gpr34	7.44541	1.70328	0.718944	2.36914	0.0178296	NA	Up	80
Bcells	Tspan31	90.5711	0.550388	0.233515	2.35697	0.0184246	NA	Up	81
Bcells	Tpt1	7297.07	0.29705	0.126176	2.35426	0.0185598	0.341714	Up	82
Bcells	Grk6	483.191	0.344619	0.146417	2.35369	0.0185882	0.341714	Up	83
Bcells	Gapdh	1134.32	0.308383	0.13261	2.32549	0.0200459	0.356623	Up	84
Bcells	Clic3	34.668	0.847509	0.365048	2.32164	0.0202524	NA	Up	85
Bcells	Smim10l1	101.995	0.550128	0.237232	2.31895	0.020398	NA	Up	86
Bcells	Marveld1	44.4659	0.879094	0.379454	2.31673	0.0205183	NA	Up	87
Bcells	Pde9a	16.8879	1.12035	0.484409	2.31281	0.020733	NA	Up	88
Bcells	Megf6	14.6595	1.22261	0.528947	2.31141	0.0208104	NA	Up	89
Bcells	Col20a1	1.41884	4.43606	1.92002	2.31043	0.0208644	NA	Up	90
Bcells	E230001N04Rik	69.0336	0.587955	0.25546	2.30155	0.0213603	NA	Up	91
Bcells	Mt1	113.065	0.633058	0.275966	2.29397	0.0217924	NA	Up	92
Bcells	Nuf2	3.2752	2.96514	1.29796	2.28446	0.0223446	NA	Up	93
Bcells	Ctgf	8.50808	1.59535	0.701722	2.27348	0.0229973	NA	Up	94
Bcells	Rps10	6280.31	0.262614	0.116647	2.25136	0.0243627	0.412021	Up	95
Bcells	9330020H09Rik	14.1871	1.18656	0.527064	2.25127	0.0243686	NA	Up	96
Bcells	Eef1b2	1727	0.284218	0.1265	2.24678	0.024654	0.412021	Up	97
Bcells	Ntrk2	31.6043	0.813381	0.362254	2.24533	0.0247468	NA	Up	98
Bcells	Tnfrsf8	4.55882	2.57036	1.147	2.24093	0.0250305	NA	Up	99
Bcells	Sparcl1	150.836	0.557087	0.248815	2.23896	0.0251586	NA	Up	100
Bcells	Sox17	111.381	0.654634	0.292597	2.23733	0.0252651	NA	Up	101
Bcells	Ahnak	236.238	0.500645	0.224059	2.23443	0.0254545	NA	Up	102
Bcells	Hnrnpa1	710.229	0.269996	0.120884	2.23351	0.0255151	0.413558	Up	103
Bcells	Myl9	168.115	0.53038	0.238168	2.22691	0.0259531	NA	Up	104
Bcells	Krt80	8.15998	1.54518	0.694452	2.22504	0.0260787	NA	Up	105
Bcells	Sit1	30.195	0.810685	0.365089	2.22051	0.0263841	NA	Up	106
Bcells	Aldh2	732.267	0.288259	0.12983	2.22028	0.0263996	0.413558	Up	107
Bcells	Rpl7a	2800.77	0.294055	0.132443	2.22024	0.0264023	0.413558	Up	108
Bcells	Pde3a	46.7712	0.687698	0.309798	2.21983	0.0264304	NA	Up	109
Bcells	H1f0	98.3264	0.616151	0.277932	2.21691	0.026629	NA	Up	110
Bcells	Robo2	2.90569	3.0033	1.35926	2.20952	0.0271388	NA	Up	111
Bcells	S1pr3	7.31286	1.70166	0.774802	2.19626	0.0280736	NA	Up	112
Bcells	Pdzd11	78.1607	0.555271	0.252896	2.19565	0.028117	NA	Up	113
Bcells	Amd1	142.534	0.422425	0.192505	2.19435	0.02821	NA	Up	114
Bcells	Dkkl1	11.8672	1.32884	0.606582	2.1907	0.0284736	NA	Up	115
Bcells	Mpg	88.406	0.486191	0.221964	2.1904	0.0284952	NA	Up	116
Bcells	Tespa1	54.9096	0.599661	0.274664	2.18325	0.0290172	NA	Up	117
Bcells	Nucks1	299.568	0.32642	0.149595	2.18203	0.0291071	NA	Up	118
Bcells	Qrfp	27.8565	0.825446	0.378713	2.17961	0.0292866	NA	Up	119
Bcells	Ptgis	26.092	0.922279	0.423928	2.17556	0.0295885	NA	Up	120
Bcells	Crip1	4466.63	0.372867	0.171812	2.17021	0.0299909	0.426643	Up	121
Bcells	Mrpl52	543.963	0.333072	0.15363	2.16801	0.0301578	0.426643	Up	122
Bcells	Hspa12b	30.9411	0.818068	0.377487	2.16714	0.0302241	NA	Up	123
Bcells	Acta2	303.878	0.440958	0.203709	2.16465	0.0304148	NA	Up	124
Bcells	Morn5	1.25585	4.39331	2.03073	2.16341	0.0305097	NA	Up	125
Bcells	Nap1l1	748.31	0.262872	0.121543	2.16279	0.0305574	0.426643	Up	126
Bcells	Cenpb	77.559	0.587234	0.272081	2.15831	0.0309038	NA	Up	127
Bcells	Plscr1	86.3821	0.594372	0.275586	2.15675	0.0310248	NA	Up	128
Bcells	Bcam	125.69	0.604867	0.281785	2.14656	0.0318285	NA	Up	129
Bcells	Hist1h2ap	49.5193	0.719017	0.33594	2.14031	0.0323294	NA	Up	130
Bcells	Vwf	116.684	0.538104	0.251964	2.13564	0.0327088	NA	Up	131
Bcells	Lamb2	31.6225	0.79474	0.372865	2.13144	0.0330525	NA	Up	132
Bcells	Nr1d1	16.7622	1.01655	0.477488	2.12896	0.0332576	NA	Up	133
Bcells	Gm15912	5.77653	1.87651	0.88461	2.12128	0.0338979	NA	Up	134
Bcells	Map3k6	11.8301	1.28184	0.606386	2.1139	0.0345241	NA	Up	135
Bcells	Heg1	150.85	0.411695	0.194906	2.11227	0.0346632	NA	Up	136
Bcells	Car4	297.743	0.487933	0.231058	2.11173	0.0347094	NA	Up	137
Bcells	Clip3	1.26391	4.31797	2.0457	2.11076	0.0347931	NA	Up	138
Bcells	Gm8730	1866.03	0.301207	0.142827	2.10889	0.0349542	0.470176	Up	139
Bcells	Klhdc8b	15.4171	1.15229	0.547112	2.10614	0.0351921	NA	Up	140
Bcells	Scarf2	11.538	1.23971	0.589306	2.10367	0.0354069	NA	Up	141
Bcells	Tspan18	62.6365	0.587026	0.28043	2.0933	0.036322	NA	Up	142
Bcells	Cxcl12	86.2097	0.573138	0.274873	2.0851	0.0370602	NA	Up	143
Bcells	Trib3	6.63555	1.58356	0.762511	2.07677	0.037823	NA	Up	144
Bcells	Pdgfb	33.5279	0.78256	0.377299	2.07411	0.0380693	NA	Up	145
Bcells	Ccdc180	33.5744	0.75127	0.363437	2.06712	0.0387225	NA	Up	146
Bcells	Selenbp1	80.6701	0.683911	0.330876	2.06697	0.038737	NA	Up	147
Bcells	N6amt1	73.7828	0.525247	0.254454	2.06421	0.0389977	NA	Up	148
Bcells	Gas7	23.8165	1.10059	0.533258	2.0639	0.0390268	NA	Up	149
Bcells	Egf	5.69894	1.80833	0.880455	2.05385	0.0399899	NA	Up	150
Bcells	Pllp	68.5463	0.584545	0.285347	2.04854	0.0405073	NA	Up	151
Bcells	Cdk2ap1	115.144	0.429881	0.209856	2.04846	0.0405149	NA	Up	152
Bcells	Epn1	310.137	0.333745	0.163021	2.04725	0.0406333	NA	Up	153
Bcells	Igkv4-70	1.76636	3.70851	1.8307	2.02574	0.0427916	NA	Up	154
Bcells	Gm3448	1.58471	3.60263	1.78194	2.02175	0.0432023	NA	Up	155
Bcells	Gltp	308.902	0.301406	0.149678	2.01369	0.0440419	NA	Up	156
Bcells	C6	3.93569	2.21656	1.10184	2.0117	0.0442518	NA	Up	157
Bcells	Nid1	37.5504	0.679271	0.338484	2.0068	0.0447706	NA	Up	158
Bcells	Gse1	42.1018	0.613717	0.307155	1.99806	0.0457097	NA	Up	159
Bcells	Serpina3g	130.757	0.446865	0.223682	1.99777	0.0457414	NA	Up	160
Bcells	9430020K01Rik	59.3421	0.645635	0.324011	1.99263	0.0463018	NA	Up	161
Bcells	Dmwd	10.2079	1.24254	0.623823	1.99181	0.0463917	NA	Up	162
Bcells	Eif4h	329.599	0.296384	0.149057	1.98839	0.0467681	0.521063	Up	163
Bcells	AU021092	15.0807	1.12399	0.565305	1.98829	0.0467798	NA	Up	164
Bcells	Clic5	81.2711	0.589246	0.296834	1.9851	0.047133	NA	Up	165
Bcells	Msl3l2	8.09358	1.45227	0.732296	1.98318	0.0473475	NA	Up	166
Bcells	1700096K18Rik	45.7835	0.634403	0.320497	1.97944	0.047767	NA	Up	167
Bcells	Gpi1	568.653	0.270072	0.136553	1.97778	0.0479534	0.528926	Up	168
Bcells	Cdca5	3.7814	2.22608	1.12786	1.97372	0.0484133	NA	Up	169
Bcells	Ckmt1	1.58602	3.66346	1.86128	1.96824	0.0490399	NA	Up	170
Bcells	5430421N21Rik	1.58602	3.66346	1.86128	1.96824	0.0490399	NA	Up	171
Bcells	Ctse	21.0174	0.850402	0.43217	1.96775	0.0490972	NA	Up	172
Bcells	Tnfrsf14	1.12632	4.19793	2.13398	1.96718	0.0491621	NA	Up	173
Bcells	Lrrc8c	94.1152	0.474379	0.241286	1.96604	0.0492937	NA	Up	174
Bcells	Galnt18	90.7652	0.508728	0.259133	1.96319	0.0496237	NA	Up	175
Bcells	Carhsp1	125.719	0.416745	0.212658	1.95969	0.0500322	NA	Up	176
Bcells	Ldb1	91.6426	0.464003	0.236964	1.95812	0.0502161	NA	Up	177
Bcells	Map3k15	1.97504	3.07501	1.57197	1.95616	0.0504464	NA	Up	178
Bcells	Snhg6	92.4667	0.437112	0.223535	1.95545	0.05053	NA	Up	179
Bcells	Hsd11b1	94.5066	0.589521	0.30158	1.95478	0.0506092	NA	Up	180
Bcells	1700028K03Rik	2.19745	3.05895	1.56538	1.95412	0.050687	NA	Up	181
Bcells	Lama5	16.4269	0.933507	0.477748	1.95397	0.0507043	NA	Up	182
Bcells	Slc6a6	153.137	0.364302	0.186709	1.95118	0.0510358	NA	Up	183
Bcells	Plekhg5	11.318	1.13796	0.584078	1.9483	0.0513791	NA	Up	184
Bcells	Bex4	33.029	0.900554	0.463269	1.94391	0.0519061	NA	Up	185
Bcells	Cdc20	17.7472	0.936558	0.482053	1.94285	0.0520337	NA	Up	186
Bcells	Iqcg	2.03445	3.04757	1.56871	1.94272	0.0520494	NA	Up	187
Bcells	Mfsd10	119.925	0.406588	0.209293	1.94268	0.0520552	NA	Up	188
Bcells	2610028H24Rik	5.30804	1.74556	0.899092	1.94147	0.0522012	NA	Up	189
Bcells	Dock9	39.797	0.673322	0.346848	1.94126	0.052227	NA	Up	190
Bcells	Col14a1	7.74734	1.4969	0.771442	1.94039	0.0523324	NA	Up	191
Bcells	Ryk	16.2478	0.934162	0.483143	1.93351	0.0531733	NA	Up	192
Bcells	Scd1	583.693	0.27494	0.142204	1.93341	0.0531851	0.54908	Up	193
Bcells	Wiz	30.9478	0.697135	0.360753	1.93245	0.0533046	NA	Up	194
Bcells	Dlc1	79.1475	0.587802	0.304346	1.93136	0.0534383	NA	Up	195
Bcells	Esco2	2.24891	3.25657	1.68901	1.92809	0.0538433	NA	Up	196
Bcells	Fgfr3	27.0301	0.755223	0.392101	1.92609	0.0540928	NA	Up	197
Bcells	Cc2d2a	3.93121	1.95427	1.01541	1.92461	0.0542787	NA	Up	198
Bcells	2310068J16Rik	6.43937	1.46958	0.764214	1.92299	0.0544809	NA	Up	199
Bcells	2410022M11Rik	49.9691	0.566182	0.29471	1.92115	0.0547131	NA	Up	200
Ciliated	Bpifa1	326.477	11.1932	1.43468	7.80185	6.10059e-15	8.1266e-11	Up	1
Ciliated	Ltf	41.3518	8.21129	1.80698	4.54422	5.51397e-06	0.0367258	Up	2
Ciliated	Mt2	49.7847	1.57686	0.428611	3.67899	0.000234161	0.919769	Up	3
Ciliated	Sult1d1	7.62824	3.97337	1.09258	3.63667	0.000276186	0.919769	Up	4
Ciliated	Cyp2a5	13.897	2.0486	0.620613	3.30092	0.000963669	0.999711	Up	5
Ciliated	Gsto1	73.5847	0.98325	0.328551	2.99268	0.00276539	0.999711	Up	6
Ciliated	Socs6	2.77225	4.33963	1.50445	2.88453	0.00391996	0.999711	Up	7
Ciliated	Gm42418	54.8282	0.994949	0.348889	2.85176	0.00434779	0.999711	Up	8
Ciliated	Ifitm1	17.4643	1.40469	0.542665	2.58851	0.00963933	0.999711	Up	9
Ciliated	Ildr1	2.11116	3.91609	1.56232	2.50658	0.0121906	0.999711	Up	10
Ciliated	Cxcl12	4.3367	2.7937	1.13539	2.46055	0.0138723	0.999711	Up	11
Ciliated	Reg3g	19.7152	4.35537	1.80252	2.41627	0.0156805	0.999711	Up	12
Ciliated	Mt1	253.106	0.680664	0.282774	2.40709	0.0160801	0.999711	Up	13
Ciliated	Qsox1	18.3626	1.14827	0.487256	2.35661	0.0184425	0.999711	Up	14
Ciliated	Nupr1	104.213	0.703722	0.299624	2.34868	0.0188399	0.999711	Up	15
Ciliated	Sugt1	21.036	1.06482	0.457688	2.32653	0.0199905	0.999711	Up	16
Ciliated	Zbtb44	1.85836	3.72492	1.61072	2.31258	0.0207458	0.999711	Up	17
Ciliated	Ndufa11	39.0128	0.831517	0.366059	2.27154	0.0231142	0.999711	Up	18
Ciliated	Selenbp1	75.9303	0.745243	0.330061	2.25789	0.0239523	0.999711	Up	19
Ciliated	F3	26.3277	1.0883	0.483142	2.25256	0.0242872	0.999711	Up	20
Ciliated	Cidea	4.78692	2.24984	1.03332	2.17729	0.0294591	0.999711	Up	21
Ciliated	Gstp1	35.2744	0.97453	0.450668	2.16241	0.0305864	0.999711	Up	22
Ciliated	Dscr3	1.6409	3.55042	1.6513	2.15007	0.0315498	0.999711	Up	23
Ciliated	Lgals3	85.9841	0.665248	0.311392	2.13637	0.0326493	0.999711	Up	24
Ciliated	Tagln	7.32827	1.98732	0.947007	2.09853	0.0358582	0.999711	Up	25
Ciliated	Cyp26b1	1.52929	3.43263	1.69153	2.02931	0.042427	0.999711	Up	26
Ciliated	Nipsnap3b	6.75073	1.66671	0.826301	2.01707	0.0436883	0.999711	Up	27
Ciliated	Exoc1	2.31448	2.90703	1.45346	2.00008	0.0454921	0.999711	Up	28
Ciliated	Txn1	115.644	0.523355	0.261815	1.99895	0.0456138	0.999711	Up	29
Ciliated	Rhpn1	1.43197	3.37344	1.71758	1.96407	0.0495222	0.999711	Up	30
Ciliated	Actg2	2.15114	2.9526	1.50642	1.96001	0.0499941	0.999711	Up	31
Ciliated	Des	2.93524	2.71378	1.39482	1.94561	0.0517013	0.999711	Up	32
Ciliated	Gsn	237.216	0.536426	0.277344	1.93416	0.053094	0.999711	Up	33
Ciliated	Fbxo31	3.27024	2.24804	1.16539	1.929	0.0537304	0.999711	Up	34
Ciliated	Smpd3	3.3	2.44868	1.27506	1.92044	0.0548024	0.999711	Up	35
Ciliated	Ctsk	9.92585	1.23712	0.646348	1.91402	0.0556178	0.999711	Up	36
Ciliated	Ppat	2.06805	2.94209	1.5406	1.90971	0.0561707	0.999711	Up	37
Ciliated	Asns	5.4826	1.67113	0.880324	1.89831	0.0576552	0.999711	Up	38
Ciliated	Tmco1	18.3372	0.909909	0.480007	1.89562	0.0580108	0.999711	Up	39
Ciliated	Romo1	47.2689	0.63615	0.335677	1.89513	0.0580753	0.999711	Up	40
Ciliated	Cox6b2	5.27874	1.85103	0.988615	1.87234	0.0611592	0.999711	Up	41
Ciliated	Pcp4l1	55.3487	0.611784	0.327613	1.8674	0.0618457	0.999711	Up	42
Ciliated	Inpp5b	1.38521	3.27569	1.75765	1.86368	0.0623673	0.999711	Up	43
Ciliated	Swi5	108.53	0.596747	0.321774	1.85455	0.0636599	0.999711	Up	44
Ciliated	Ktn1	18.9374	0.860508	0.467202	1.84183	0.0654995	0.999711	Up	45
Ciliated	Ccdc34	13.875	1.21542	0.660816	1.83928	0.0658747	0.999711	Up	46
Ciliated	Mrpl19	2.61297	2.37097	1.30066	1.8229	0.0683179	0.999711	Up	47
Ciliated	Wtap	6.96907	1.39505	0.767099	1.8186	0.068972	0.999711	Up	48
Ciliated	Nomo1	2.67219	2.39017	1.31477	1.81794	0.0690726	0.999711	Up	49
Ciliated	Ddah2	9.92555	1.17462	0.65329	1.798	0.0721767	0.999711	Up	50
Ciliated	Pgrmc1	52.4425	0.602085	0.335932	1.79228	0.0730876	0.999711	Up	51
Ciliated	Azgp1	1.27937	3.18448	1.77734	1.79171	0.0731787	0.999711	Up	52
Ciliated	Mrpl37	5.93426	1.59817	0.891979	1.79171	0.0731791	0.999711	Up	53
Ciliated	Pmpcb	5.53585	1.56906	0.876563	1.79001	0.0734525	0.999711	Up	54
Ciliated	Cyp2b10	29.256	0.768831	0.429806	1.78878	0.0736496	0.999711	Up	55
Ciliated	Commd10	4.20158	1.84724	1.03387	1.78672	0.0739822	0.999711	Up	56
Ciliated	Myl9	14.9345	1.20487	0.675244	1.78435	0.0743663	0.999711	Up	57
Ciliated	Ly6c1	53.7136	0.653	0.366516	1.78164	0.0748077	0.999711	Up	58
Ciliated	Actb	257.832	0.404301	0.227784	1.77493	0.07591	0.999711	Up	59
Ciliated	Pfkl	8.60001	1.30703	0.736421	1.77484	0.0759241	0.999711	Up	60
Ciliated	Gm26917	13.6949	1.01416	0.575145	1.76332	0.0778465	0.999711	Up	61
Ciliated	Wdr70	1.7982	2.70323	1.53858	1.75696	0.0789242	0.999711	Up	62
Ciliated	Casp4	1.24979	3.17782	1.81164	1.75412	0.0794108	0.999711	Up	63
Ciliated	Gm11808	34.6893	0.652807	0.374219	1.74445	0.0810802	0.999711	Up	64
Ciliated	Hps3	1.93189	2.63401	1.51116	1.74305	0.0813255	0.999711	Up	65
Ciliated	Rpl35	150.65	0.485325	0.27873	1.7412	0.0816481	0.999711	Up	66
Ciliated	Fam181b	1.24402	3.12495	1.79705	1.73893	0.0820471	0.999711	Up	67
Ciliated	Nme3	1.7925	2.68239	1.54373	1.73761	0.0822798	0.999711	Up	68
Ciliated	Akr7a5	15.1337	0.926399	0.533253	1.73726	0.0823414	0.999711	Up	69
Ciliated	Ldhb	65.1823	0.584627	0.336627	1.73672	0.0824362	0.999711	Up	70
Ciliated	Fkbp8	26.899	0.717718	0.416532	1.72308	0.0848737	0.999711	Up	71
Ciliated	Rfng	1.75722	2.65956	1.54941	1.7165	0.0860702	0.999711	Up	72
Ciliated	Polr2f	25.3961	0.702795	0.409497	1.71624	0.0861185	0.999711	Up	73
Ciliated	Arl6ip1	35.4338	0.640137	0.373135	1.71556	0.086242	0.999711	Up	74
Ciliated	Hectd1	15.8938	0.874908	0.510573	1.71358	0.0866061	0.999711	Up	75
Ciliated	Gm10036	3.91564	1.95546	1.14404	1.70926	0.0874027	0.999711	Up	76
Ciliated	Zswim8	2.30281	2.35169	1.37676	1.70813	0.0876128	0.999711	Up	77
Ciliated	Cbr3	14.5838	0.972587	0.569961	1.70641	0.0879322	0.999711	Up	78
Ciliated	Cecr2	1.19339	3.13499	1.83783	1.70581	0.0880427	0.999711	Up	79
Ciliated	Dnajc1	9.70819	1.11346	0.654492	1.70125	0.0888951	0.999711	Up	80
Ciliated	Ptk7	3.8884	1.96832	1.16057	1.69599	0.0898877	0.999711	Up	81
Ciliated	Lpin2	8.86421	1.14881	0.678089	1.69418	0.0902305	0.999711	Up	82
Ciliated	Zfp750	2.29838	2.54617	1.50334	1.69368	0.0903261	0.999711	Up	83
Ciliated	Trub2	1.17628	3.05711	1.80733	1.6915	0.0907407	0.999711	Up	84
Ciliated	Tsc2	1.72757	2.63467	1.56479	1.68372	0.0922357	0.999711	Up	85
Ciliated	Banf1	17.1347	0.830244	0.493624	1.68194	0.0925814	0.999711	Up	86
Ciliated	Limk2	3.34557	1.88088	1.11843	1.68171	0.0926247	0.999711	Up	87
Ciliated	Slc2a1	6.22554	1.34944	0.80549	1.67531	0.0938743	0.999711	Up	88
Ciliated	Krt7	24.4766	0.725053	0.433017	1.67442	0.0940481	0.999711	Up	89
Ciliated	Adamtsl5	2.63505	2.19753	1.315	1.67112	0.0946983	0.999711	Up	90
Ciliated	Nsmaf	1.69229	2.6106	1.56319	1.67005	0.0949102	0.999711	Up	91
Ciliated	Psmc1	9.31363	1.11148	0.665608	1.66986	0.0949461	0.999711	Up	92
Ciliated	Pip5k1c	2.26182	2.31802	1.38957	1.66815	0.095285	0.999711	Up	93
Ciliated	Eif3h	36.8145	0.711541	0.427112	1.66594	0.0957258	0.999711	Up	94
Ciliated	Dnajc30	5.40125	1.44278	0.867075	1.66396	0.0961208	0.999711	Up	95
Ciliated	Ndrg2	1.75715	2.63932	1.58717	1.66291	0.0963302	0.999711	Up	96
Ciliated	Agr2	1.71912	2.63876	1.58702	1.66271	0.0963697	0.999711	Up	97
Ciliated	Rbmx	4.7926	1.52345	0.916493	1.66226	0.0964598	0.999711	Up	98
Ciliated	Dctn2	14.069	0.906169	0.546738	1.65741	0.0974365	0.999711	Up	99
Ciliated	Krt15	11.8452	1.1979	0.723878	1.65483	0.0979584	0.999711	Up	100
Ciliated	Dhrs7	17.3259	0.809498	0.489996	1.65205	0.0985244	0.999711	Up	101
Ciliated	Gm21149	2.8085	2.00619	1.2206	1.64361	0.100257	0.999711	Up	102
Ciliated	Tstd1	16.4188	0.856122	0.521031	1.64313	0.100356	0.999711	Up	103
Ciliated	Edn1	6.41353	1.35435	0.825784	1.64007	0.10099	0.999711	Up	104
Ciliated	Abtb1	3.41997	1.79558	1.09608	1.63817	0.101386	0.999711	Up	105
Ciliated	Cfap58	5.90285	1.34802	0.826858	1.6303	0.103039	0.999711	Up	106
Ciliated	Map3k4	1.68088	2.56691	1.5854	1.61909	0.105428	0.999711	Up	107
Ciliated	Aplf	1.17339	3.03177	1.87539	1.61661	0.105962	0.999711	Up	108
Ciliated	Iars2	5.4234	1.37349	0.850962	1.61404	0.106518	0.999711	Up	109
Ciliated	Sfpq	14.3704	0.859951	0.533193	1.61283	0.106781	0.999711	Up	110
Ciliated	Rnf141	4.14296	1.61377	1.00208	1.61042	0.107306	0.999711	Up	111
Ciliated	Stoml1	2.2896	2.15326	1.33907	1.60803	0.107828	0.999711	Up	112
Ciliated	Adck5	2.13486	2.2582	1.40543	1.60677	0.108106	0.999711	Up	113
Ciliated	Ggct	1.6456	2.54129	1.58552	1.60281	0.108976	0.999711	Up	114
Ciliated	Ubxn10	21.8154	0.702261	0.438481	1.60158	0.10925	0.999711	Up	115
Ciliated	Mustn1	5.61525	1.65868	1.03912	1.59624	0.110436	0.999711	Up	116
Ciliated	Champ1	2.12634	2.24035	1.40365	1.59609	0.11047	0.999711	Up	117
Ciliated	Cfap20	39.1296	0.587645	0.36899	1.59258	0.111254	0.999711	Up	118
Ciliated	Aoc1	16.2979	0.956918	0.601339	1.59131	0.111539	0.999711	Up	119
Ciliated	Ndufs2	13.819	0.908944	0.571734	1.5898	0.111879	0.999711	Up	120
Ciliated	Tef	8.93031	1.05032	0.66074	1.58961	0.111923	0.999711	Up	121
Ciliated	Fam49a	5.91249	1.32912	0.836827	1.58829	0.112222	0.999711	Up	122
Ciliated	Txnl4a	6.71277	1.26466	0.799786	1.58125	0.113821	0.999711	Up	123
Ciliated	Arfgef1	10.5419	0.973822	0.615906	1.58112	0.11385	0.999711	Up	124
Ciliated	2410015M20Rik	31.1556	0.59845	0.380439	1.57305	0.115708	0.999711	Up	125
Ciliated	Dstyk	3.20156	1.81954	1.15712	1.57247	0.115841	0.999711	Up	126
Ciliated	Basp1	2.18562	2.29493	1.46472	1.56681	0.11716	0.999711	Up	127
Ciliated	Afap1	1.07037	2.91935	1.86505	1.5653	0.117514	0.999711	Up	128
Ciliated	Hotairm1	1.61596	2.51527	1.61051	1.56178	0.11834	0.999711	Up	129
Ciliated	Cmtm8	38.124	0.644603	0.41302	1.5607	0.118593	0.999711	Up	130
Ciliated	Tbc1d14	2.69426	2.05424	1.3175	1.55919	0.118952	0.999711	Up	131
Ciliated	Apoa1bp	65.9121	0.464522	0.29794	1.55911	0.11897	0.999711	Up	132
Ciliated	Acsl3	14.8008	0.81398	0.522084	1.5591	0.118973	0.999711	Up	133
Ciliated	Tulp4	9.12187	1.03317	0.663613	1.55688	0.119499	0.999711	Up	134
Ciliated	Odf3b	37.8305	0.566464	0.363978	1.55632	0.119633	0.999711	Up	135
Ciliated	Sharpin	3.72417	1.63139	1.05287	1.54947	0.121269	0.999711	Up	136
Ciliated	Zfp362	1.60744	2.49282	1.61312	1.54533	0.122265	0.999711	Up	137
Ciliated	Calm2	131.829	0.392518	0.254602	1.54169	0.123149	0.999711	Up	138
Ciliated	Ankrd37	17.2964	0.832921	0.54198	1.53681	0.12434	0.999711	Up	139
Ciliated	Pax9	1.14663	3.0244	1.96973	1.53544	0.124675	0.999711	Up	140
Ciliated	Arl14ep	1.09713	2.9308	1.9091	1.53517	0.124742	0.999711	Up	141
Ciliated	Tbata	3.96207	1.58509	1.03365	1.53349	0.125156	0.999711	Up	142
Ciliated	Cdk1	1.1086	3.01296	1.97376	1.5265	0.126885	0.999711	Up	143
Ciliated	Ppp1r32	5.19117	1.39795	0.916471	1.52536	0.127169	0.999711	Up	144
Ciliated	Dcxr	66.9279	0.463643	0.304455	1.52286	0.127794	0.999711	Up	145
Ciliated	Zfp830	2.15412	2.07229	1.36177	1.52176	0.128069	0.999711	Up	146
Ciliated	Grtp1	1.06466	2.89001	1.90039	1.52075	0.128323	0.999711	Up	147
Ciliated	Avpi1	34.9627	0.583689	0.384092	1.51966	0.128597	0.999711	Up	148
Ciliated	Gps2	3.93685	1.53231	1.00968	1.51763	0.129108	0.999711	Up	149
Ciliated	Zfos1	7.44908	1.13718	0.74979	1.51667	0.12935	0.999711	Up	150
Ciliated	Stpg1	2.49257	1.95001	1.28852	1.51337	0.130185	0.999711	Up	151
Ciliated	Galnt1	5.27522	1.30135	0.860941	1.51154	0.130652	0.999711	Up	152
Ciliated	Miip	3.96361	1.53585	1.01683	1.51043	0.130934	0.999711	Up	153
Ciliated	Cyp4b1	74.2889	0.443402	0.293561	1.51043	0.130934	0.999711	Up	154
Ciliated	Frat2	1.06184	2.89204	1.91518	1.51006	0.131029	0.999711	Up	155
Ciliated	Hspa9	10.7514	0.935245	0.619808	1.50893	0.131317	0.999711	Up	156
Ciliated	Usp34	12.6448	0.863947	0.572705	1.50854	0.131417	0.999711	Up	157
Ciliated	Hnrnpc	19.3552	0.709564	0.471198	1.50587	0.1321	0.999711	Up	158
Ciliated	Trmt6	2.38795	2.02335	1.34632	1.50287	0.132873	0.999711	Up	159
Ciliated	Clmn	3.03066	1.70961	1.13906	1.50089	0.133383	0.999711	Up	160
Ciliated	Pkm	22.2746	0.678449	0.452905	1.49799	0.134135	0.999711	Up	161
Ciliated	Snrpb	44.2002	0.544111	0.36344	1.49711	0.134364	0.999711	Up	162
Ciliated	Ndufaf3	29.595	0.721237	0.481961	1.49646	0.134533	0.999711	Up	163
Ciliated	Slc39a3	2.20763	2.07453	1.38744	1.49522	0.134857	0.999711	Up	164
Ciliated	Impact	1.54251	2.43741	1.63137	1.49409	0.135153	0.999711	Up	165
Ciliated	Acaca	1.54251	2.43741	1.63137	1.49409	0.135153	0.999711	Up	166
Ciliated	Atp1b1	41.1916	0.556872	0.373083	1.49262	0.135536	0.999711	Up	167
Ciliated	Hepacam	2.11595	2.03014	1.36203	1.49053	0.136086	0.999711	Up	168
Ciliated	Rpl23a	209.873	0.424547	0.285658	1.48621	0.137224	0.999711	Up	169
Ciliated	Syne1	10.1904	0.929976	0.626292	1.48489	0.137572	0.999711	Up	170
Ciliated	Fech	3.5984	1.55524	1.04776	1.48435	0.137717	0.999711	Up	171
Ciliated	Acp2	2.89415	1.78113	1.20061	1.48352	0.137937	0.999711	Up	172
Ciliated	Arhgef26	3.16069	1.79684	1.2145	1.47949	0.13901	0.999711	Up	173
Ciliated	Ptges	1.0322	2.85067	1.92886	1.4779	0.139433	0.999711	Up	174
Ciliated	Wisp2	1.63983	2.5087	1.69794	1.4775	0.139542	0.999711	Up	175
Ciliated	Asna1	11.3616	0.926033	0.626948	1.47705	0.139663	0.999711	Up	176
Ciliated	Lrrc23	34.6618	0.607622	0.411502	1.47659	0.139784	0.999711	Up	177
Ciliated	Ass1	14.7961	0.797739	0.540315	1.47643	0.139827	0.999711	Up	178
Ciliated	Rab25	11.1589	0.925645	0.627864	1.47428	0.140407	0.999711	Up	179
Ciliated	Klk11	3.51453	1.65173	1.12117	1.47322	0.140692	0.999711	Up	180
Ciliated	Adrb2	4.72632	1.5263	1.03625	1.47291	0.140775	0.999711	Up	181
Ciliated	Rac2	15.1347	0.789549	0.53679	1.47087	0.141326	0.999711	Up	182
Ciliated	Zfp950	3.86228	1.55462	1.05697	1.47083	0.141337	0.999711	Up	183
Ciliated	Gm14964	15.0743	0.771748	0.524971	1.47008	0.14154	0.999711	Up	184
Ciliated	Gm26542	2.00902	2.12488	1.44591	1.46958	0.141676	0.999711	Up	185
Ciliated	Lbp	11.2538	0.878351	0.598379	1.46788	0.142136	0.999711	Up	186
Ciliated	Fermt1	6.35736	1.13171	0.771904	1.46613	0.142613	0.999711	Up	187
Ciliated	Mgrn1	5.57422	1.25177	0.853848	1.46604	0.142638	0.999711	Up	188
Ciliated	Cuta	31.9403	0.581182	0.397011	1.46389	0.143223	0.999711	Up	189
Ciliated	Cyc1	17.6842	0.698727	0.477417	1.46356	0.143315	0.999711	Up	190
Ciliated	Ces1d	121.843	0.393196	0.268775	1.46292	0.14349	0.999711	Up	191
Ciliated	Erich3	8.84943	0.993055	0.67891	1.46272	0.143544	0.999711	Up	192
Ciliated	Bmp2k	6.53485	1.12493	0.770108	1.46074	0.144086	0.999711	Up	193
Ciliated	Creb3	8.03374	1.02706	0.705947	1.45487	0.145704	0.999711	Up	194
Ciliated	Vps54	4.05624	1.45309	0.999194	1.45426	0.145873	0.999711	Up	195
Ciliated	Hmgn3	18.7007	0.713292	0.491973	1.44986	0.147098	0.999711	Up	196
Ciliated	Pld3	6.51613	1.15061	0.793943	1.44924	0.147271	0.999711	Up	197
Ciliated	Wdr89	67.8755	0.422649	0.291661	1.44911	0.147307	0.999711	Up	198
Ciliated	Pno1	2.85317	1.75419	1.2116	1.44783	0.147666	0.999711	Up	199
Ciliated	Zhx1	2.99531	1.68257	1.1633	1.44638	0.148071	0.999711	Up	200
DC	Ccl4	29.9401	1.94362	0.465551	4.17489	2.98134e-05	0.217876	Up	1
DC	Sult1a1	53.9593	1.09035	0.284816	3.82825	0.000129059	0.369882	Up	2
DC	Cxcl2	11.5145	7.25674	1.9157	3.78804	0.00015184	0.369882	Up	3
DC	2810417H13Rik	83.9961	0.946702	0.271136	3.49161	0.000480117	0.670484	Up	4
DC	Cfp	187.517	0.617149	0.178846	3.45073	0.000559062	0.670484	Up	5
DC	Sdc1	13.3467	2.10095	0.61101	3.43848	0.000584982	0.670484	Up	6
DC	Mki67	32.4485	1.38909	0.404598	3.43327	0.000596353	0.670484	Up	7
DC	AY036118	52.849	1.10674	0.339021	3.26451	0.00109653	0.999957	Up	8
DC	Vim	1730.69	0.519064	0.164182	3.16153	0.00156945	0.999957	Up	9
DC	S100a4	615.716	0.423778	0.134297	3.15553	0.00160206	0.999957	Up	10
DC	Retnla	343.488	2.74441	0.889408	3.08566	0.00203104	0.999957	Up	11
DC	Lmna	128.142	0.827202	0.269837	3.06556	0.0021726	0.999957	Up	12
DC	Ighm	1325.68	2.58683	0.860293	3.00692	0.0026391	0.999957	Up	13
DC	Gda	33.1034	1.18359	0.394359	3.00131	0.0026882	0.999957	Up	14
DC	Birc5	46.5276	1.05858	0.361962	2.92456	0.00344939	0.999957	Up	15
DC	Top2a	52.3591	1.0219	0.350139	2.91855	0.00351663	0.999957	Up	16
DC	Vsnl1	4.49399	4.07456	1.40533	2.89935	0.00373939	0.999957	Up	17
DC	Rps12-ps3	322.592	0.440638	0.152623	2.88711	0.00388803	0.999957	Up	18
DC	Rps12	1744.26	0.359839	0.124683	2.88602	0.00390145	0.999957	Up	19
DC	Tppp3	214.404	0.621374	0.217009	2.86336	0.00419174	0.999957	Up	20
DC	Wdr89	970.445	0.335825	0.120106	2.79608	0.00517271	0.999957	Up	21
DC	Chst7	9.89427	1.86981	0.674035	2.77405	0.00553637	0.999957	Up	22
DC	Tgfbi	149.49	0.566282	0.204419	2.77021	0.00560203	0.999957	Up	23
DC	H1fx	12.4019	1.77481	0.646278	2.7462	0.00602905	0.999957	Up	24
DC	Gapdh	626.614	0.377538	0.138172	2.73238	0.00628785	0.999957	Up	25
DC	Eaf2	4.56642	3.38777	1.24996	2.71029	0.00672243	0.999957	Up	26
DC	Ube2c	42.667	0.981562	0.366043	2.68155	0.00732823	0.999957	Up	27
DC	Hist1h1b	7.33864	2.39221	0.896883	2.66725	0.00764756	0.999957	Up	28
DC	Ccl9	283.648	0.561045	0.210486	2.66547	0.00768801	0.999957	Up	29
DC	Fcrls	22.1756	1.30175	0.499988	2.60356	0.00922611	0.999957	Up	30
DC	Rrm2	22.4481	1.29657	0.498383	2.60156	0.00928008	0.999957	Up	31
DC	Serpina3g	14.6013	1.4158	0.546383	2.59123	0.00956332	0.999957	Up	32
DC	Ankrd37	73.82	0.803173	0.31276	2.56801	0.0102284	0.999957	Up	33
DC	Bpifa1	5.83973	2.29282	0.900349	2.5466	0.0108779	0.999957	Up	34
DC	Rbm3	587.861	0.386539	0.152495	2.53477	0.011252	0.999957	Up	35
DC	Prc1	12.383	1.57702	0.622819	2.53207	0.0113391	0.999957	Up	36
DC	Oosp1	1.74372	4.57481	1.81682	2.51803	0.0118012	0.999957	Up	37
DC	Trem2	8.43651	1.98184	0.796474	2.48827	0.0128368	0.999957	Up	38
DC	Rpl7a	1121.91	0.284775	0.114805	2.48051	0.0131193	0.999957	Up	39
DC	Mybl2	5.71512	2.37617	0.964193	2.46442	0.0137237	0.999957	Up	40
DC	Clec2g	3.7054	3.69603	1.50347	2.45834	0.0139583	0.999957	Up	41
DC	Apoc1	9.09183	2.01466	0.832028	2.42138	0.0154616	0.999957	Up	42
DC	Igkc	7434.69	3.01313	1.24677	2.41676	0.0156595	0.999957	Up	43
DC	Txndc5	81.363	0.680304	0.281637	2.41553	0.0157123	0.999957	Up	44
DC	Edn1	44.8908	0.779383	0.32317	2.41168	0.0158792	0.999957	Up	45
DC	Derl3	5.65115	2.273	0.945294	2.40454	0.0161927	0.999957	Up	46
DC	Gm42418	272.134	0.990277	0.413463	2.39508	0.0166167	0.999957	Up	47
DC	Esco2	11.3491	1.48118	0.61902	2.39278	0.0167212	0.999957	Up	48
DC	Tk1	20.4595	1.13157	0.473478	2.38991	0.0168526	0.999957	Up	49
DC	Stmn1	236.024	0.499825	0.20979	2.3825	0.0171955	0.999957	Up	50
DC	Erdr1	16.5416	1.36429	0.5836	2.33772	0.0194017	0.999957	Up	51
DC	Dmkn	6.38881	2.54217	1.10179	2.3073	0.021038	0.999957	Up	52
DC	Tuba1c	51.6658	0.708226	0.30832	2.29705	0.0216158	0.999957	Up	53
DC	Jchain	918.492	4.2608	1.86865	2.28015	0.0225989	0.999957	Up	54
DC	Clu	55.5969	0.756339	0.33218	2.27689	0.0227926	0.999957	Up	55
DC	Kcnmb4os2	1.60729	4.42179	1.94402	2.27456	0.0229326	0.999957	Up	56
DC	Pard6g	14.4831	1.21371	0.537757	2.25699	0.024009	0.999957	Up	57
DC	Iglv1	5.95757	2.41304	1.07197	2.25104	0.0243832	0.999957	Up	58
DC	Clspn	7.7765	1.67898	0.749421	2.24036	0.0250674	0.999957	Up	59
DC	Cmklr1	2.24251	3.81222	1.70437	2.23674	0.0253036	0.999957	Up	60
DC	Sccpdh	4.09449	2.4206	1.08538	2.23019	0.0257345	0.999957	Up	61
DC	Scgb3a2	17.5369	1.1187	0.50181	2.22933	0.0257923	0.999957	Up	62
DC	Il4i1	58.8511	0.718474	0.322831	2.22555	0.0260446	0.999957	Up	63
DC	Aqp3	7.99862	1.9064	0.859422	2.21823	0.0265389	0.999957	Up	64
DC	Mt2	111.853	1.35548	0.612937	2.21145	0.0270048	0.999957	Up	65
DC	Igfbp2	10.1502	1.70811	0.773214	2.2091	0.0271679	0.999957	Up	66
DC	Eef1a1	4718.05	0.276587	0.125206	2.20906	0.0271703	0.999957	Up	67
DC	Bcam	36.0863	0.829074	0.375838	2.20593	0.0273886	0.999957	Up	68
DC	Gnb2l1	993.562	0.274004	0.125024	2.19161	0.0284074	0.999957	Up	69
DC	Ptgs1	8.28472	1.67275	0.766124	2.18339	0.0290073	0.999957	Up	70
DC	Trim21	1.36641	4.16294	1.91992	2.16829	0.0301368	0.999957	Up	71
DC	Chn2	18.8248	1.04172	0.486755	2.14013	0.0323444	0.999957	Up	72
DC	Mgat4b	22.5711	0.93379	0.437413	2.1348	0.0327774	0.999957	Up	73
DC	AA467197	90.4176	0.568581	0.267678	2.12412	0.0336599	0.999957	Up	74
DC	Tuba1b	506.574	0.392924	0.185014	2.12375	0.0336907	0.999957	Up	75
DC	Hist1h2ap	70.0144	1.36829	0.6476	2.11286	0.0346129	0.999957	Up	76
DC	Coq7	15.949	1.07841	0.51062	2.11195	0.0346907	0.999957	Up	77
DC	Myl9	49.5047	0.716852	0.340443	2.10564	0.0352354	0.999957	Up	78
DC	Hmgb2	345.942	0.411641	0.196038	2.0998	0.0357466	0.999957	Up	79
DC	Avpi1	94.6625	0.463794	0.22166	2.09237	0.0364054	0.999957	Up	80
DC	Egr1	9.58258	1.35505	0.64958	2.08604	0.0369749	0.999957	Up	81
DC	Plpp2	31.0361	0.757849	0.363418	2.08534	0.0370386	0.999957	Up	82
DC	Cd209f	1.37829	4.23872	2.03936	2.07845	0.0376679	0.999957	Up	83
DC	Calm4	3.37802	3.02638	1.45617	2.07832	0.0376795	0.999957	Up	84
DC	Tpi1	100.55	0.473009	0.227682	2.0775	0.0377557	0.999957	Up	85
DC	Gja1	5.1576	2.27661	1.10145	2.06693	0.0387411	0.999957	Up	86
DC	Gpx2	8.27075	4.98561	2.41324	2.06594	0.038834	0.999957	Up	87
DC	Rab38	2.97801	2.77878	1.34618	2.0642	0.0389986	0.999957	Up	88
DC	Pdap1	74.4305	0.513232	0.248725	2.06345	0.0390698	0.999957	Up	89
DC	Hnrnpa1	300.112	0.318796	0.154522	2.06311	0.0391021	0.999957	Up	90
DC	Hist1h2ab	1.87372	3.58993	1.74332	2.05925	0.0394704	0.999957	Up	91
DC	Mif	166.582	0.376586	0.183179	2.05584	0.0397976	0.999957	Up	92
DC	Tubb5	620.079	0.318637	0.156619	2.03446	0.0419048	0.999957	Up	93
DC	Krtdap	2.80318	3.25279	1.60133	2.0313	0.0422243	0.999957	Up	94
DC	Dusp14	2.98228	2.76892	1.36386	2.0302	0.0423361	0.999957	Up	95
DC	Ncl	225.185	0.343645	0.169634	2.02581	0.0427846	0.999957	Up	96
DC	Adh7	7.26703	4.7936	2.3704	2.02227	0.043148	0.999957	Up	97
DC	Fam162b	2.64405	3.11679	1.54878	2.01242	0.0441753	0.999957	Up	98
DC	Eif4h	123.872	0.407865	0.202934	2.00984	0.0444481	0.999957	Up	99
DC	Fst	2.6768	3.1699	1.57854	2.00812	0.0446303	0.999957	Up	100
DC	Mamdc2	5.81672	1.82533	0.909355	2.00728	0.0447194	0.999957	Up	101
DC	Gm26917	83.9465	0.549358	0.274653	2.00019	0.0454803	0.999957	Up	102
DC	Kif21a	3.45167	2.42808	1.21781	1.99382	0.0461721	0.999957	Up	103
DC	Serping1	15.9663	1.0376	0.520525	1.99336	0.0462217	0.999957	Up	104
DC	Fgfr1	62.0267	0.576699	0.290375	1.98605	0.0470279	0.999957	Up	105
DC	Adam9	13.8044	1.05708	0.533802	1.98029	0.0476705	0.999957	Up	106
DC	Dbp	14.8356	1.0533	0.532758	1.97708	0.0480331	0.999957	Up	107
DC	Ppp1r14a	25.9085	0.799561	0.404822	1.97509	0.0482576	0.999957	Up	108
DC	Pcna	67.9496	0.521792	0.264852	1.97013	0.0488238	0.999957	Up	109
DC	Bag2	3.92425	2.21168	1.1229	1.96961	0.0488828	0.999957	Up	110
DC	Hif1a	39.1193	0.65639	0.333334	1.96917	0.0489337	0.999957	Up	111
DC	Sox6	1.7931	3.53856	1.7973	1.96881	0.0489746	0.999957	Up	112
DC	Plek2	1.88149	3.66344	1.87068	1.95834	0.05019	0.999957	Up	113
DC	Spink2	4.99449	1.86633	0.953137	1.95809	0.0502189	0.999957	Up	114
DC	Tmeff2	5.40319	1.77275	0.909386	1.94939	0.0512491	0.999957	Up	115
DC	Prss23	29.3179	0.780815	0.402238	1.94118	0.0522365	0.999957	Up	116
DC	Selenbp1	26.9837	0.862213	0.444366	1.94032	0.0523407	0.999957	Up	117
DC	Spred2	6.31454	1.58459	0.820468	1.93132	0.0534432	0.999957	Up	118
DC	Megf6	4.95116	1.91132	0.991208	1.92827	0.0538214	0.999957	Up	119
DC	Cdc20	13.3605	1.19368	0.61939	1.92718	0.0539573	0.999957	Up	120
DC	Kifc5b	1.77527	3.42545	1.78088	1.92346	0.0544228	0.999957	Up	121
DC	Eea1	31.2521	0.708028	0.36849	1.92143	0.0546775	0.999957	Up	122
DC	Gpi1	260.787	0.299138	0.155731	1.92087	0.0547485	0.999957	Up	123
DC	Myh14	3.98117	2.07974	1.08345	1.91955	0.0549145	0.999957	Up	124
DC	Farp2	2.40135	2.89007	1.51159	1.91193	0.0558847	0.999957	Up	125
DC	Atad2	17.516	0.914859	0.478705	1.91111	0.0559901	0.999957	Up	126
DC	Cdca3	26.5552	0.861315	0.451113	1.90931	0.0562216	0.999957	Up	127
DC	Pvrl1	26.9303	0.824609	0.433065	1.90412	0.0568943	0.999957	Up	128
DC	Colec12	3.26354	2.288	1.20307	1.90181	0.0571962	0.999957	Up	129
DC	Nid2	4.97544	1.78567	0.939438	1.90079	0.05733	0.999957	Up	130
DC	Gmnn	34.7395	0.739187	0.388933	1.90055	0.0573609	0.999957	Up	131
DC	Pltp	142.243	0.514919	0.271514	1.89647	0.0578975	0.999957	Up	132
DC	Slamf9	105.267	0.412468	0.217679	1.89484	0.0581131	0.999957	Up	133
DC	B930041F14Rik	3.10405	2.3773	1.25635	1.89223	0.0584604	0.999957	Up	134
DC	Rrm1	13.8214	1.09828	0.580959	1.89046	0.0586965	0.999957	Up	135
DC	Hnrnpdl	114.838	0.412224	0.218796	1.88406	0.0595574	0.999957	Up	136
DC	Ckb	465.019	0.330239	0.176325	1.8729	0.0610823	0.999957	Up	137
DC	Mt1	431.451	0.391719	0.209326	1.87134	0.0612984	0.999957	Up	138
DC	Mgst3	73.1107	0.46956	0.25106	1.87031	0.0614404	0.999957	Up	139
DC	Snhg6	38.65	0.649149	0.347576	1.86765	0.0618115	0.999957	Up	140
DC	Hist1h1e	14.2667	0.985181	0.527707	1.86691	0.0619144	0.999957	Up	141
DC	Gstm1	139.946	0.480379	0.25732	1.86686	0.0619216	0.999957	Up	142
DC	Ccl3	7.81774	1.65748	0.888972	1.86449	0.0622534	0.999957	Up	143
DC	Cox4i2	8.79816	1.40898	0.756781	1.86181	0.0626302	0.999957	Up	144
DC	Ncapg	6.40361	1.51352	0.81357	1.86034	0.0628376	0.999957	Up	145
DC	Cog5	3.117	2.31829	1.24834	1.8571	0.0632964	0.999957	Up	146
DC	Rab25	3.57771	2.13281	1.1493	1.85574	0.0634906	0.999957	Up	147
DC	Pcna-ps2	2.24384	2.90057	1.568	1.84985	0.0643349	0.999957	Up	148
DC	Hist1h2ac	1.23501	3.96939	2.14885	1.84722	0.0647158	0.999957	Up	149
DC	Egr2	5.4882	1.67105	0.907868	1.84063	0.0656759	0.999957	Up	150
DC	Dut	61.9495	0.510174	0.277667	1.83736	0.0661566	0.999957	Up	151
DC	Etohi1	9.61199	1.19411	0.651191	1.83374	0.066693	0.999957	Up	152
DC	Alox5	11.7465	1.06541	0.58198	1.83067	0.06715	0.999957	Up	153
DC	Hspb1	50.5641	0.603341	0.330646	1.82474	0.068041	0.999957	Up	154
DC	Fam183b	5.39822	1.64924	0.905293	1.82178	0.0684886	0.999957	Up	155
DC	Nf1	21.2253	0.783059	0.430415	1.81931	0.068864	0.999957	Up	156
DC	Nme2	130.496	0.372958	0.20573	1.81285	0.0698549	0.999957	Up	157
DC	Cd109	1.12325	3.96748	2.19567	1.80695	0.0707695	0.999957	Up	158
DC	Ccna2	19.7437	0.8544	0.473564	1.80419	0.0712013	0.999957	Up	159
DC	Ahnak	351.652	0.277804	0.154296	1.80046	0.0717885	0.999957	Up	160
DC	Perp	15.2262	2.48457	1.38852	1.78936	0.0735563	0.999957	Up	161
DC	mt-Nd3	215.319	0.373106	0.208767	1.78719	0.0739072	0.999957	Up	162
DC	Ctdspl2	23.1511	0.775968	0.434193	1.78715	0.0739134	0.999957	Up	163
DC	Cd163	15.7625	0.927248	0.519146	1.7861	0.0740826	0.999957	Up	164
DC	Sgol2a	4.26701	1.80824	1.01399	1.78329	0.0745389	0.999957	Up	165
DC	Isoc2b	12.3328	1.02906	0.577102	1.78314	0.0745629	0.999957	Up	166
DC	Tubb4b	109.115	0.408993	0.229496	1.78213	0.0747273	0.999957	Up	167
DC	Ucp2	603.583	0.267818	0.150337	1.78145	0.0748391	0.999957	Up	168
DC	Cdk4	114.018	0.364976	0.205373	1.77714	0.0755455	0.999957	Up	169
DC	Wdr34	4.01702	1.99248	1.12393	1.77278	0.0762644	0.999957	Up	170
DC	Ccl17	811.415	0.974322	0.549806	1.77212	0.0763746	0.999957	Up	171
DC	Klf5	2.25739	2.99915	1.69253	1.77199	0.0763955	0.999957	Up	172
DC	Fnbp1	91.3541	0.399156	0.225512	1.77	0.0767278	0.999957	Up	173
DC	Tm9sf1	8.07243	1.24437	0.703523	1.76877	0.076932	0.999957	Up	174
DC	Trmt12	13.0585	0.994565	0.563712	1.76431	0.0776791	0.999957	Up	175
DC	Cyhr1	23.8603	0.740063	0.419588	1.76379	0.0777681	0.999957	Up	176
DC	Ube2m	45.2732	0.561431	0.319241	1.75864	0.0786381	0.999957	Up	177
DC	Trim29	3.57375	2.14224	1.22388	1.75037	0.080054	0.999957	Up	178
DC	Pi4ka	13.9046	0.940215	0.537223	1.75014	0.0800944	0.999957	Up	179
DC	Mmp12	56.0811	1.37187	0.784007	1.74982	0.0801489	0.999957	Up	180
DC	Hras	51.6001	0.524646	0.300696	1.74477	0.0810251	0.999957	Up	181
DC	Trim11	15.0106	0.955082	0.547403	1.74475	0.0810279	0.999957	Up	182
DC	Adam10	38.6251	0.597207	0.342635	1.74298	0.0813366	0.999957	Up	183
DC	Kif22	7.85724	1.24982	0.717067	1.74296	0.0813401	0.999957	Up	184
DC	Cask	11.355	1.03944	0.5969	1.74139	0.0816148	0.999957	Up	185
DC	Gas8	6.71936	1.38161	0.793597	1.74095	0.0816919	0.999957	Up	186
DC	Crim1	13.5471	0.942863	0.542782	1.73709	0.0823706	0.999957	Up	187
DC	Gsto1	88.2972	0.501605	0.28881	1.7368	0.0824227	0.999957	Up	188
DC	Jph1	0.995957	3.70068	2.13838	1.7306	0.0835233	0.999957	Up	189
DC	Gas7	51.1762	0.539344	0.311856	1.72947	0.0837255	0.999957	Up	190
DC	Dusp1	72.7815	0.489693	0.283203	1.72912	0.083787	0.999957	Up	191
DC	Pvrl2	2.85891	2.24199	1.29766	1.72771	0.0840399	0.999957	Up	192
DC	Cenpf	19.8442	0.82004	0.475865	1.72326	0.0848411	0.999957	Up	193
DC	Slc9a3r2	98.3287	0.46428	0.269919	1.72007	0.0854193	0.999957	Up	194
DC	Itgam	47.0026	0.523142	0.30439	1.71866	0.0856763	0.999957	Up	195
DC	Pi4k2b	9.25743	1.13617	0.661288	1.71812	0.0857756	0.999957	Up	196
DC	Elovl5	62.4299	0.45928	0.267478	1.71708	0.0859654	0.999957	Up	197
DC	Dek	215.432	0.291299	0.169913	1.7144	0.0864548	0.999957	Up	198
DC	Srsf5	214.488	0.297257	0.173414	1.71415	0.0865014	0.999957	Up	199
DC	Gm10384	1.10543	3.83354	2.23806	1.71288	0.0867342	0.999957	Up	200
Endo	Edn1	3113.23	2.57264	0.0934581	27.5273	8.28614e-167	8.82143e-163	Up	1
Endo	Bnip3	843.705	2.81641	0.127899	22.0206	1.82741e-107	9.72733e-104	Up	2
Endo	Ldha	2030.48	1.61344	0.103936	15.5234	2.40761e-54	6.80562e-51	Up	3
Endo	Pde4b	1748.63	1.91287	0.123255	15.5196	2.55706e-54	6.80562e-51	Up	4
Endo	Ankrd37	2493	3.49645	0.247663	14.1178	2.95105e-45	6.28337e-42	Up	5
Endo	Dusp6	1329.18	1.61412	0.116096	13.9033	6.0484e-44	1.07319e-40	Up	6
Endo	Bhlhe40	269.101	2.66571	0.20175	13.2129	7.39094e-40	1.12406e-36	Up	7
Endo	Sparcl1	1250.69	1.26782	0.104137	12.1745	4.24918e-34	5.6546e-31	Up	8
Endo	Lpl	1015.51	1.50978	0.125769	12.0044	3.37092e-33	3.58868e-30	Up	9
Endo	Selenbp1	422.664	1.61426	0.134848	11.9709	5.04606e-33	4.88367e-30	Up	10
Endo	Avpi1	1137.61	1.25764	0.107631	11.6848	1.52485e-31	1.3528e-28	Up	11
Endo	Pfkl	482.666	1.90172	0.171132	11.1126	1.08918e-28	8.91956e-26	Up	12
Endo	Amd1	1179.24	2.79588	0.269606	10.3702	3.38784e-25	2.57621e-22	Up	13
Endo	Ptprr	207.981	1.80389	0.182502	9.8842	4.87474e-23	3.45976e-20	Up	14
Endo	Mxi1	262.427	1.42097	0.152029	9.34674	9.0388e-21	6.01419e-18	Up	15
Endo	Atp1a1	1565.09	0.847102	0.0910257	9.30618	1.32511e-20	8.29828e-18	Up	16
Endo	Aldoa	4212.96	1.02238	0.110205	9.27707	1.74211e-20	1.03036e-17	Up	17
Endo	Cd200	4512.43	0.923234	0.104826	8.80729	1.28213e-18	7.18399e-16	Up	18
Endo	Ifngr1	2602.83	1.113	0.127011	8.76299	1.90144e-18	1.01214e-15	Up	19
Endo	Sox17	2421.09	1.02828	0.118049	8.71066	3.02123e-18	1.53162e-15	Up	20
Endo	Tpi1	767.188	1.13914	0.1332	8.5521	1.20873e-17	5.84913e-15	Up	21
Endo	Ackr2	386.364	1.22739	0.14642	8.38269	5.17315e-17	2.39449e-14	Up	22
Endo	Nr1d1	146.177	1.97842	0.239055	8.27597	1.27409e-16	5.65166e-14	Up	23
Endo	Mark4	286.479	1.12342	0.136236	8.24612	1.63618e-16	6.69954e-14	Up	24
Endo	Mgll	1343.07	1.05323	0.129277	8.14708	3.72809e-16	1.46997e-13	Up	25
Endo	Galnt18	1795.5	0.701067	0.0871275	8.04645	8.52308e-16	3.2406e-13	Up	26
Endo	Lrg1	547.286	1.08702	0.136127	7.98528	1.40201e-15	5.14682e-13	Up	27
Endo	Fam181b	337.865	1.07533	0.135101	7.95943	1.72835e-15	6.13334e-13	Up	28
Endo	Higd1a	1304.13	0.802881	0.102559	7.82851	4.93687e-15	1.64243e-12	Up	29
Endo	Anxa2	3040.35	0.768362	0.0982713	7.81878	5.33366e-15	1.72067e-12	Up	30
Endo	Ubc	5924.68	0.603298	0.079936	7.54727	4.44481e-14	1.39175e-11	Up	31
Endo	Cbx6	341.04	0.933828	0.127974	7.297	2.94251e-13	8.95028e-11	Up	32
Endo	Rgs12	1116.63	0.740718	0.104116	7.11435	1.12438e-12	3.32503e-10	Up	33
Endo	Snrk	1424.32	0.651359	0.0921394	7.06928	1.55738e-12	4.36311e-10	Up	34
Endo	St5	654.783	0.709148	0.10085	7.0317	2.0403e-12	5.5695e-10	Up	35
Endo	Timp3	1251.01	0.833169	0.118668	7.02103	2.20234e-12	5.86152e-10	Up	36
Endo	Rftn1	366.165	0.946786	0.136126	6.95524	3.51963e-12	9.13902e-10	Up	37
Endo	Eif4h	1313.26	0.844606	0.121609	6.94527	3.77728e-12	9.57451e-10	Up	38
Endo	Plpp1	5503.83	0.52313	0.0776904	6.73353	1.65597e-11	4.0067e-09	Up	39
Endo	Lonrf1	97.758	1.58127	0.235555	6.71293	1.90755e-11	4.51284e-09	Up	40
Endo	Plcb4	418.879	0.80952	0.121658	6.65409	2.85057e-11	6.5972e-09	Up	41
Endo	Qsox1	611.649	0.839682	0.126471	6.63934	3.15083e-11	7.13696e-09	Up	42
Endo	Tiam1	210.167	1.28652	0.19491	6.60058	4.0955e-11	8.89811e-09	Up	43
Endo	Sult1a1	225.011	1.28327	0.195164	6.57536	4.85366e-11	1.03344e-08	Up	44
Endo	Pkm	1739.11	0.60864	0.0926623	6.56836	5.0871e-11	1.04149e-08	Up	45
Endo	Tagln2	3961.1	0.597063	0.0910506	6.55749	5.47203e-11	1.09915e-08	Up	46
Endo	Marveld1	486.579	0.827299	0.126583	6.53561	6.33524e-11	1.24898e-08	Up	47
Endo	Hic1	113.616	1.49052	0.229755	6.48741	8.73239e-11	1.68506e-08	Up	48
Endo	Gadd45b	292.73	0.945403	0.145779	6.48516	8.86374e-11	1.68506e-08	Up	49
Endo	Sox7	949.967	0.700819	0.108772	6.44303	1.17114e-10	2.18737e-08	Up	50
Endo	Fam107a	75.5603	2.11211	0.330272	6.39506	1.60481e-10	2.94566e-08	Up	51
Endo	Adm	66.6266	4.26695	0.677778	6.2955	3.06408e-10	5.52885e-08	Up	52
Endo	Icam2	8898.75	0.477128	0.0769813	6.19798	5.71929e-10	9.98157e-08	Up	53
Endo	Tef	184.106	2.42322	0.395123	6.13283	8.63316e-10	1.45887e-07	Up	54
Endo	Slc2a1	99.7221	1.54992	0.253828	6.1062	1.02033e-09	1.69725e-07	Up	55
Endo	Hilpda	5632.82	0.63593	0.104378	6.09259	1.11096e-09	1.81958e-07	Up	56
Endo	Eln	717.118	0.715581	0.118479	6.03974	1.54366e-09	2.48997e-07	Up	57
Endo	Ddit4	194.38	1.08763	0.180467	6.02678	1.67254e-09	2.6576e-07	Up	58
Endo	Serpine1	317.53	0.898515	0.149175	6.02323	1.7097e-09	2.67669e-07	Up	59
Endo	Slc16a3	44.7346	2.08493	0.34838	5.98463	2.16878e-09	3.34621e-07	Up	60
Endo	Gapdh	2092.59	0.664516	0.111153	5.97838	2.25371e-09	3.42757e-07	Up	61
Endo	Impdh1	2249.87	0.549825	0.0930856	5.90666	3.49109e-09	5.16196e-07	Up	62
Endo	Ier3	3253.34	1.90456	0.322856	5.89911	3.65473e-09	5.3299e-07	Up	63
Endo	Acer2	2263.94	0.521553	0.0891373	5.85112	4.88284e-09	7.0247e-07	Up	64
Endo	Lrrc8c	659.295	0.666992	0.114892	5.80536	6.4229e-09	9.11709e-07	Up	65
Endo	Idh2	616.713	0.589071	0.102972	5.72068	1.06098e-08	1.48621e-06	Up	66
Endo	Trp53i11	236.519	1.04701	0.183487	5.70618	1.1554e-08	1.59745e-06	Up	67
Endo	Rasa4	120.057	1.08874	0.192342	5.66041	1.5101e-08	2.035e-06	Up	68
Endo	Lims2	1489.12	0.651251	0.116177	5.60567	2.07449e-08	2.72654e-06	Up	69
Endo	8430408G22Rik	1313.19	2.95147	0.528902	5.58038	2.39997e-08	3.11587e-06	Up	70
Endo	Pdk1	143.745	1.01824	0.183544	5.54763	2.89567e-08	3.66991e-06	Up	71
Endo	Lrrc32	471.323	0.736822	0.133156	5.53351	3.13877e-08	3.93122e-06	Up	72
Endo	Fgfr3	407.902	0.868907	0.157992	5.49967	3.80495e-08	4.60312e-06	Up	73
Endo	Mecom	179.644	0.936069	0.171837	5.44741	5.11078e-08	6.04549e-06	Up	74
Endo	Ttc39c	74.1167	1.67671	0.308588	5.4335	5.52599e-08	6.44921e-06	Up	75
Endo	Megf6	140.65	1.04206	0.191837	5.43198	5.57324e-08	6.44921e-06	Up	76
Endo	Samd9l	427.209	0.851534	0.156861	5.4286	5.67991e-08	6.50197e-06	Up	77
Endo	Ckb	539.281	0.648181	0.119689	5.41553	6.11081e-08	6.92082e-06	Up	78
Endo	Ndrg1	134.303	0.99055	0.184128	5.37968	7.46195e-08	8.3621e-06	Up	79
Endo	Sigmar1	346.944	0.731607	0.136431	5.36246	8.20946e-08	9.10395e-06	Up	80
Endo	Akap12	743.503	0.712577	0.133069	5.35494	8.55858e-08	9.39327e-06	Up	81
Endo	Fry	295.52	0.755823	0.142386	5.30828	1.10665e-07	1.20218e-05	Up	82
Endo	Plod2	107.603	1.06475	0.201096	5.29473	1.19195e-07	1.25639e-05	Up	83
Endo	Hhex	699.988	0.560726	0.107124	5.23436	1.65556e-07	1.72795e-05	Up	84
Endo	Phactr4	190.07	0.965871	0.184768	5.22749	1.7183e-07	1.77602e-05	Up	85
Endo	Clec14a	8836.59	0.407023	0.0779028	5.22476	1.74384e-07	1.78508e-05	Up	86
Endo	Amd2	21.3709	2.70952	0.525607	5.15503	2.53595e-07	2.52316e-05	Up	87
Endo	Lxn	1114.73	0.500113	0.0971557	5.14754	2.63922e-07	2.60158e-05	Up	88
Endo	Gtf3a	363.864	0.625969	0.122331	5.117	3.1044e-07	2.97743e-05	Up	89
Endo	Ntrk2	476.007	1.89418	0.370509	5.11237	3.18142e-07	3.0123e-05	Up	90
Endo	Add3	979.59	0.560531	0.109662	5.11143	3.19736e-07	3.0123e-05	Up	91
Endo	Flt1	2115.23	0.462862	0.0915059	5.05828	4.23051e-07	3.91635e-05	Up	92
Endo	Mgp	2370.16	0.621064	0.123298	5.03708	4.72677e-07	4.30095e-05	Up	93
Endo	Plk2	1577.63	0.674844	0.134615	5.01315	5.35471e-07	4.83103e-05	Up	94
Endo	Rassf9	408.808	0.633016	0.127084	4.98108	6.32293e-07	5.60949e-05	Up	95
Endo	Vwf	1849.58	0.425932	0.0858656	4.96045	7.03285e-07	6.13703e-05	Up	96
Endo	Pdgfb	618.358	0.586894	0.118964	4.93338	8.082e-07	6.93878e-05	Up	97
Endo	Ralgapa2	246.01	0.704199	0.144294	4.88031	1.05919e-06	8.94927e-05	Up	98
Endo	Cyb561	719.113	0.543494	0.111657	4.86754	1.12996e-06	9.4721e-05	Up	99
Endo	Asns	188.773	0.760726	0.156684	4.85516	1.2029e-06	0.000100047	Up	100
Endo	Fam102b	220.502	0.737424	0.153889	4.79192	1.65195e-06	0.000133232	Up	101
Endo	Gars	385.513	0.588875	0.123248	4.77796	1.77081e-06	0.000141744	Up	102
Endo	Plat	322.344	0.694617	0.146617	4.73763	2.16233e-06	0.000169266	Up	103
Endo	Prr18	64.1656	1.27512	0.270351	4.71653	2.39898e-06	0.000185069	Up	104
Endo	Vegfc	392.4	0.648741	0.137744	4.70977	2.47994e-06	0.000189938	Up	105
Endo	Mafb	106.521	1.06401	0.228085	4.66498	3.08652e-06	0.000229784	Up	106
Endo	Srgn	4279	0.354038	0.076085	4.65319	3.26837e-06	0.000241633	Up	107
Endo	Prickle1	1065.15	0.506992	0.109239	4.64114	3.46499e-06	0.000254215	Up	108
Endo	Klhdc8b	158.789	0.851791	0.183581	4.63987	3.48632e-06	0.000254215	Up	109
Endo	Hspa12b	604.534	0.531279	0.115559	4.59746	4.27672e-06	0.000307635	Up	110
Endo	Bag5	897.796	0.461062	0.100463	4.58936	4.44611e-06	0.000317673	Up	111
Endo	Limk1	53.7343	1.33632	0.292321	4.57142	4.84426e-06	0.000341536	Up	112
Endo	Kdsr	536.975	0.591314	0.131302	4.50345	6.6859e-06	0.000462196	Up	113
Endo	Slc46a3	94.5258	1.12138	0.249533	4.4939	6.99293e-06	0.000477223	Up	114
Endo	Ripk3	135.175	0.911149	0.202823	4.49233	7.04492e-06	0.000477708	Up	115
Endo	Fibin	2041.37	0.489751	0.109581	4.46929	7.84812e-06	0.000525478	Up	116
Endo	Slc44a1	381.087	0.770383	0.172854	4.45685	8.31744e-06	0.000553422	Up	117
Endo	Pmp22	3521.93	0.50905	0.114686	4.43865	9.05231e-06	0.000591233	Up	118
Endo	Mxd4	1367.61	0.44729	0.101131	4.4229	9.73864e-06	0.00063218	Up	119
Endo	Tcn2	2600.1	0.430282	0.0973422	4.4203	9.85643e-06	0.000635949	Up	120
Endo	Gstm1	4446.28	0.336087	0.0770218	4.36353	1.27978e-05	0.000806184	Up	121
Endo	Gprc5a	108.658	0.902782	0.207437	4.35207	1.34857e-05	0.000844519	Up	122
Endo	Plscr3	1343.08	0.430581	0.0990108	4.34883	1.36868e-05	0.000852101	Up	123
Endo	Zfp395	69.5094	1.16162	0.270755	4.2903	1.78429e-05	0.00106716	Up	124
Endo	Bpifa1	32.8154	2.01255	0.471974	4.2641	2.00706e-05	0.00119086	Up	125
Endo	Dbp	333.801	2.61295	0.61288	4.26339	2.01347e-05	0.00119086	Up	126
Endo	P4ha1	163.989	0.775462	0.182034	4.25998	2.04442e-05	0.00120248	Up	127
Endo	Xpnpep1	401.03	0.51213	0.121132	4.22786	2.3592e-05	0.00135763	Up	128
Endo	Chil3	777.237	0.443652	0.105125	4.22025	2.44027e-05	0.00139673	Up	129
Endo	Ly6c1	13167.4	0.36848	0.0875661	4.20802	2.5762e-05	0.00146664	Up	130
Endo	Arid5b	844.098	0.446276	0.106485	4.19097	2.77765e-05	0.00155529	Up	131
Endo	Map3k6	185.252	1.86417	0.4457	4.18257	2.88232e-05	0.0015899	Up	132
Endo	1500009L16Rik	50.8334	1.19723	0.286702	4.17589	2.96828e-05	0.00162888	Up	133
Endo	Cdkn1b	276.381	0.63776	0.154774	4.12059	3.77902e-05	0.00205262	Up	134
Endo	Map3k1	217.374	0.776494	0.18898	4.10887	3.97597e-05	0.00213779	Up	135
Endo	Polr3gl	560.624	0.512933	0.126199	4.06448	4.81391e-05	0.00254969	Up	136
Endo	Pfkfb3	81.3886	1.0022	0.246765	4.06134	4.87918e-05	0.00257147	Up	137
Endo	Apln	626.105	0.447625	0.11051	4.05055	5.10966e-05	0.00267968	Up	138
Endo	Atoh8	36.6312	1.39796	0.34805	4.01657	5.90521e-05	0.00308171	Up	139
Endo	1810011O10Rik	632.524	0.556469	0.140461	3.96174	7.44054e-05	0.00379005	Up	140
Endo	Smad7	1272.26	0.441069	0.112111	3.9342	8.34736e-05	0.00421166	Up	141
Endo	Pfkp	234.9	0.562554	0.143377	3.9236	8.72358e-05	0.00436015	Up	142
Endo	Mctp1	227.807	0.826353	0.210926	3.91773	8.93861e-05	0.00444675	Up	143
Endo	Tspan4	551.513	0.639613	0.164018	3.89964	9.63354e-05	0.00470453	Up	144
Endo	Ackr3	398.782	0.498442	0.128068	3.89202	9.94142e-05	0.00483271	Up	145
Endo	Trib3	54.2182	1.06335	0.274627	3.87196	0.000107962	0.00517731	Up	146
Endo	Narf	85.3062	0.871507	0.225753	3.86044	0.000113184	0.0054034	Up	147
Endo	Bcam	2003.16	0.387703	0.101347	3.82551	0.000130502	0.00607937	Up	148
Endo	Ppme1	146.343	0.683641	0.179133	3.81639	0.000135421	0.00626821	Up	149
Endo	Gpi1	974.407	0.378103	0.0992419	3.80991	0.000139017	0.0064068	Up	150
Endo	Eci2	389.299	0.461672	0.12137	3.80385	0.000142463	0.00653733	Up	151
Endo	Pknox2	40.8987	1.37655	0.36219	3.80063	0.000144331	0.00659465	Up	152
Endo	Glt28d2	60.7723	1.02398	0.270293	3.78842	0.000151607	0.00685014	Up	153
Endo	Eif4ebp1	467.605	0.436527	0.115525	3.77864	0.00015769	0.00699485	Up	154
Endo	Tmem109	1158.99	0.416062	0.110213	3.77506	0.000159967	0.00706641	Up	155
Endo	Exoc3l2	27.241	1.48922	0.397765	3.74397	0.000181134	0.00787081	Up	156
Endo	Adgrl4	2210.87	0.348471	0.094483	3.68818	0.000225862	0.00946663	Up	157
Endo	Ccdc184	377.274	0.464542	0.126459	3.67346	0.000239288	0.00995102	Up	158
Endo	Tinagl1	1135.82	0.493967	0.135036	3.65804	0.000254148	0.0105279	Up	159
Endo	Tmem88	465.488	0.466759	0.127654	3.65645	0.000255736	0.0105526	Up	160
Endo	Atp8a1	495.949	0.39962	0.110597	3.61331	0.000302317	0.0122842	Up	161
Endo	Mthfd2	87.2277	0.78973	0.218679	3.61136	0.000304595	0.0123297	Up	162
Endo	Myl12a	7182.01	0.264522	0.0737615	3.58618	0.000335553	0.0133295	Up	163
Endo	Tiparp	105.339	0.755474	0.211172	3.57753	0.000346853	0.0136787	Up	164
Endo	Cables1	34.5002	1.27645	0.3568	3.57749	0.000346915	0.0136787	Up	165
Endo	Aqp1	8787.65	0.338947	0.0947905	3.57575	0.00034923	0.0137192	Up	166
Endo	Fkbp14	119.263	1.56539	0.440362	3.55477	0.000378306	0.0147055	Up	167
Endo	Cldn5	24652.6	0.29921	0.0843838	3.54582	0.000391392	0.0151519	Up	168
Endo	Tnks1bp1	144.411	0.748525	0.212893	3.51597	0.000438146	0.0167726	Up	169
Endo	Tbx2	717.606	0.436862	0.124254	3.51589	0.000438282	0.0167726	Up	170
Endo	Ramp3	195.571	0.565336	0.160873	3.51417	0.000441135	0.0167726	Up	171
Endo	Bcl2	512.47	0.427268	0.121683	3.5113	0.000445915	0.016894	Up	172
Endo	Cdkn1a	1736.64	0.84887	0.24192	3.50889	0.00044998	0.0169875	Up	173
Endo	Gpihbp1	8706.72	0.285964	0.0815386	3.5071	0.000453023	0.017042	Up	174
Endo	Rbfox3	74.4539	0.911801	0.260231	3.50382	0.00045864	0.0171925	Up	175
Endo	Tspan18	1379.59	0.360283	0.102957	3.49935	0.000466389	0.0174217	Up	176
Endo	Chst1	697.662	0.401354	0.114855	3.49445	0.000475041	0.0176212	Up	177
Endo	Glb1l2	92.7773	0.762806	0.219465	3.47575	0.000509429	0.0187323	Up	178
Endo	Srsf5	2079.28	0.31916	0.0918391	3.47521	0.000510454	0.0187323	Up	179
Endo	Anxa3	2965.83	0.276521	0.0795887	3.47438	0.000512033	0.0187323	Up	180
Endo	Maff	151.016	0.658794	0.190503	3.45818	0.000543832	0.0196926	Up	181
Endo	Agfg1	585.714	0.427805	0.123826	3.45488	0.000550537	0.0198679	Up	182
Endo	Bhlhe41	33.4142	1.41164	0.408975	3.45166	0.000557143	0.0199039	Up	183
Endo	Rbm3	2287.08	0.339288	0.0983382	3.45022	0.000560134	0.0199438	Up	184
Endo	Ephx1	396.405	0.4575	0.132787	3.44537	0.000570268	0.0202369	Up	185
Endo	Slco2a1	3545.53	0.271081	0.0794566	3.41169	0.000645626	0.0225355	Up	186
Endo	Tmeff1	486.023	0.562224	0.165371	3.39977	0.000674423	0.0233873	Up	187
Endo	Vdac1	631.162	0.377071	0.111981	3.36728	0.000759137	0.0259864	Up	188
Endo	Per3	91.6546	1.81132	0.540135	3.35346	0.000798085	0.0272321	Up	189
Endo	Pllp	1604.48	0.312982	0.093463	3.34873	0.000811834	0.0274374	Up	190
Endo	Fas	1357.89	0.336407	0.100504	3.34721	0.000816291	0.0274508	Up	191
Endo	Per2	11.1531	2.74583	0.821576	3.34214	0.000831338	NA	Up	192
Endo	Pgam1	746.769	0.331995	0.0993595	3.34135	0.000833726	0.0276676	Up	193
Endo	Cd24a	1543.27	0.325852	0.0979666	3.32615	0.000880532	0.0289325	Up	194
Endo	Idi1	199.11	0.5153	0.155189	3.32047	0.000898675	0.0294378	Up	195
Endo	Wdsub1	83.556	0.748024	0.226161	3.30748	0.000941403	0.03065	Up	196
Endo	Daam1	550.771	0.434814	0.131464	3.30747	0.000941439	0.03065	Up	197
Endo	Fam19a1	44.2152	1.01433	0.311357	3.25776	0.00112294	0.0359004	Up	198
Endo	Hbp1	460.742	0.403953	0.124816	3.23639	0.00121052	0.0384693	Up	199
Endo	Fgd5	428.667	0.377068	0.116568	3.23475	0.00121749	0.0385756	Up	200
Erythro	Edn1	68.875	0.807414	0.267576	3.01751	0.00254859	0.99988	Up	1
Erythro	Ier3	103.957	0.907781	0.308039	2.94697	0.00320906	0.99988	Up	2
Erythro	AY036118	77.5155	1.0036	0.34533	2.90621	0.0036584	0.99988	Up	3
Erythro	Ch25h	2.05209	4.34682	1.69444	2.56535	0.0103072	0.99988	Up	4
Erythro	Bpifa1	7.35379	2.0017	0.792756	2.52499	0.0115701	0.99988	Up	5
Erythro	Trrap	5.74035	2.21448	0.888502	2.49238	0.0126891	0.99988	Up	6
Erythro	5730455P16Rik	3.96413	2.83127	1.14486	2.47302	0.0133976	0.99988	Up	7
Erythro	Spag9	17.66	1.15537	0.467571	2.471	0.0134735	0.99988	Up	8
Erythro	Sox17	54.8172	0.705294	0.296431	2.37928	0.0173464	0.99988	Up	9
Erythro	Stag1	13.7186	1.23965	0.530588	2.33637	0.0194721	0.99988	Up	10
Erythro	Gtf2ird1	2.33923	3.4656	1.50081	2.30915	0.020935	0.99988	Up	11
Erythro	Bnip3	29.5906	0.838786	0.374847	2.23767	0.0252424	0.99988	Up	12
Erythro	Ankrd37	89.0037	0.716695	0.326606	2.19437	0.0282088	0.99988	Up	13
Erythro	Ager	136.073	0.622237	0.285478	2.17963	0.0292848	0.99988	Up	14
Erythro	Pus10	1.3852	3.80414	1.75405	2.16877	0.0301001	0.99988	Up	15
Erythro	Calcrl	171.244	0.480845	0.22376	2.14894	0.0316395	0.99988	Up	16
Erythro	Mgp	320.344	0.42203	0.196712	2.14543	0.0319189	0.99988	Up	17
Erythro	Slc25a20	8.86191	1.45717	0.685809	2.12474	0.0336082	0.99988	Up	18
Erythro	Igfbp4	41.9122	0.687722	0.324569	2.11888	0.0341007	0.99988	Up	19
Erythro	Zfp664	8.42028	1.45153	0.686862	2.11327	0.0345776	0.99988	Up	20
Erythro	Vcam1	13.0168	1.30794	0.623007	2.09939	0.0357824	0.99988	Up	21
Erythro	Cyp26b1	11.5733	1.4709	0.702063	2.09511	0.0361616	0.99988	Up	22
Erythro	Clec14a	198.287	0.425308	0.203311	2.0919	0.0364471	0.99988	Up	23
Erythro	Tnks1bp1	5.45437	1.84244	0.883125	2.08627	0.0369542	0.99988	Up	24
Erythro	Cnnm3	3.05408	2.52555	1.22494	2.06178	0.0392285	0.99988	Up	25
Erythro	Cd200	91.7008	0.500952	0.243297	2.05901	0.039493	0.99988	Up	26
Erythro	2810417H13Rik	5.15371	2.03028	0.988175	2.05458	0.0399198	0.99988	Up	27
Erythro	Ttll3	1.83927	3.23009	1.58019	2.04411	0.0409423	0.99988	Up	28
Erythro	Ackr3	6.25769	1.62978	0.798125	2.04201	0.0411504	0.99988	Up	29
Erythro	Acvrl1	134.269	0.450239	0.222469	2.02383	0.0429874	0.99988	Up	30
Erythro	Pde3a	18.4169	0.946369	0.467903	2.02258	0.0431167	0.99988	Up	31
Erythro	Inpp5k	13.5558	1.07961	0.541132	1.99509	0.0460326	0.99988	Up	32
Erythro	Rusc2	3.765	2.11113	1.06445	1.9833	0.0473339	0.99988	Up	33
Erythro	Polk	3.27008	2.36962	1.20562	1.96548	0.0493585	0.99988	Up	34
Erythro	Gnb4	8.59192	1.3016	0.663337	1.9622	0.0497391	0.99988	Up	35
Erythro	Pde4b	54.8759	0.559842	0.286445	1.95445	0.0506479	0.99988	Up	36
Erythro	Ccdc137	1.73346	3.16393	1.6231	1.94931	0.0512582	0.99988	Up	37
Erythro	Gm10269	2.30121	2.79983	1.43699	1.9484	0.0513671	0.99988	Up	38
Erythro	Ucp2	218.99	0.459746	0.238145	1.93053	0.0535407	0.99988	Up	39
Erythro	Usp53	1.78114	3.21903	1.68064	1.91536	0.0554471	0.99988	Up	40
Erythro	Bcam	54.1809	0.575753	0.301337	1.91066	0.0560479	0.99988	Up	41
Erythro	Postn	9.23172	1.22454	0.641935	1.90758	0.056446	0.99988	Up	42
Erythro	Chil3	155.948	0.426719	0.224225	1.90308	0.0570299	0.99988	Up	43
Erythro	Nr1d2	5.05024	1.72458	0.907323	1.90073	0.057337	0.99988	Up	44
Erythro	Pdxdc1	7.32581	1.39261	0.734338	1.89641	0.0579056	0.99988	Up	45
Erythro	Bag6	16.3098	0.894745	0.473403	1.89003	0.0587544	0.99988	Up	46
Erythro	Hdac4	2.92453	2.35448	1.24837	1.88604	0.0592896	0.99988	Up	47
Erythro	Wisp2	7.47488	1.34751	0.716734	1.88007	0.0600986	0.99988	Up	48
Erythro	Patz1	4.68207	1.68991	0.899205	1.87934	0.0601979	0.99988	Up	49
Erythro	Bpnt1	4.40442	1.77011	0.946519	1.87013	0.0614663	0.99988	Up	50
Erythro	Ip6k2	4.44958	1.79319	0.964825	1.85856	0.0630893	0.99988	Up	51
Erythro	Cdk19	14.6099	0.93311	0.505722	1.8451	0.0650224	0.99988	Up	52
Erythro	Tshz2	6.24921	1.44692	0.784457	1.84448	0.065113	0.99988	Up	53
Erythro	Brms1l	3.01295	2.26397	1.23904	1.8272	0.0676704	0.99988	Up	54
Erythro	Tmem191c	3.4256	2.22166	1.22187	1.81825	0.069026	0.99988	Up	55
Erythro	Aldh3b1	7.9731	1.23606	0.680004	1.81773	0.0691051	0.99988	Up	56
Erythro	Btrc	5.70874	1.54917	0.855134	1.81162	0.0700457	0.99988	Up	57
Erythro	Fuz	4.73153	1.63221	0.902086	1.80937	0.0703936	0.99988	Up	58
Erythro	Kdsr	15.6115	0.893438	0.49494	1.80514	0.0710526	0.99988	Up	59
Erythro	Lonrf1	4.10601	1.84657	1.02537	1.80088	0.0717222	0.99988	Up	60
Erythro	Efcab7	1.07957	3.41228	1.89587	1.79985	0.0718839	0.99988	Up	61
Erythro	Ncoa6	5.25764	1.5647	0.872294	1.79377	0.0728491	0.99988	Up	62
Erythro	Mfap4	62.259	0.529147	0.295292	1.79194	0.073142	0.99988	Up	63
Erythro	Tusc1	1.67896	2.8828	1.61462	1.78544	0.0741902	0.99988	Up	64
Erythro	Tnk1	1.5323	2.95909	1.66146	1.78102	0.0749099	0.99988	Up	65
Erythro	Akap12	25.6081	0.746388	0.420301	1.77584	0.0757587	0.99988	Up	66
Erythro	Cav1	192.804	0.37257	0.209855	1.77537	0.0758365	0.99988	Up	67
Erythro	Selenbp1	32.8746	0.652834	0.368253	1.77279	0.0762643	0.99988	Up	68
Erythro	Cds2	15.2181	0.91247	0.517239	1.76412	0.0777123	0.99988	Up	69
Erythro	Neurl2	2.5113	2.42046	1.37746	1.75719	0.0788857	0.99988	Up	70
Erythro	Diexf	2.13044	2.49752	1.42798	1.74899	0.0802924	0.99988	Up	71
Erythro	Grb14	7.8254	1.34392	0.769121	1.74735	0.0805764	0.99988	Up	72
Erythro	Pde8b	3.00136	2.05994	1.18428	1.7394	0.081964	0.99988	Up	73
Erythro	Trim24	4.80758	1.54275	0.889557	1.73429	0.0828674	0.99988	Up	74
Erythro	Apaf1	2.39411	2.33937	1.35044	1.7323	0.0832201	0.99988	Up	75
Erythro	Ackr2	9.81181	1.07585	0.622486	1.7283	0.0839337	0.99988	Up	76
Erythro	Slc3a2	66.9427	0.461409	0.267107	1.72743	0.0840905	0.99988	Up	77
Erythro	Dcp1b	3.24247	1.91533	1.11411	1.71915	0.0855865	0.99988	Up	78
Erythro	Agfg2	3.24382	1.89571	1.10296	1.71876	0.0856588	0.99988	Up	79
Erythro	Ift140	6.79676	1.4446	0.843198	1.71324	0.0866677	0.99988	Up	80
Erythro	Mfge8	22.1386	0.781057	0.456088	1.71251	0.086802	0.99988	Up	81
Erythro	Fhdc1	2.94457	2.04682	1.19903	1.70706	0.0878107	0.99988	Up	82
Erythro	Amd1	21.8516	0.745368	0.437688	1.70297	0.0885742	0.99988	Up	83
Erythro	Ccnb2	6.90351	1.36762	0.803101	1.70293	0.0885814	0.99988	Up	84
Erythro	Tmed8	3.33196	1.93927	1.13973	1.70151	0.0888466	0.99988	Up	85
Erythro	Lztfl1	7.82963	1.20456	0.708501	1.70016	0.0891009	0.99988	Up	86
Erythro	Smim4	9.57384	1.04099	0.615699	1.69074	0.090886	0.99988	Up	87
Erythro	Dock6	5.67531	1.43056	0.847999	1.68699	0.0916055	0.99988	Up	88
Erythro	Fst	1.57708	2.7654	1.64606	1.68001	0.0929563	0.99988	Up	89
Erythro	Nsf	12.1862	0.936907	0.558444	1.67771	0.0934037	0.99988	Up	90
Erythro	Smox	39.5834	0.699196	0.416847	1.67735	0.0934748	0.99988	Up	91
Erythro	Tpi1	42.5993	0.539136	0.321523	1.67682	0.0935777	0.99988	Up	92
Erythro	Ybx3	11.8591	0.927513	0.554075	1.67399	0.0941332	0.99988	Up	93
Erythro	Baz1a	11.4837	0.961834	0.576848	1.6674	0.0954357	0.99988	Up	94
Erythro	Ism1	2.54729	2.19219	1.31696	1.66458	0.0959967	0.99988	Up	95
Erythro	Adgrg3	1.5441	2.86726	1.72271	1.66439	0.0960348	0.99988	Up	96
Erythro	Abhd11	7.29005	1.22383	0.736612	1.66143	0.0966267	0.99988	Up	97
Erythro	Adprm	4.77674	1.60659	0.96809	1.65954	0.0970063	0.99988	Up	98
Erythro	3300002A11Rik	2.89949	1.99728	1.20417	1.65863	0.0971899	0.99988	Up	99
Erythro	Lin54	3.9014	1.78432	1.07616	1.65804	0.0973089	0.99988	Up	100
Erythro	Tbxas1	4.14396	1.65727	1.0012	1.65528	0.0978669	0.99988	Up	101
Erythro	Eif4h	50.1962	0.4868	0.294749	1.65158	0.0986211	0.99988	Up	102
Erythro	2310022A10Rik	2.81323	2.07205	1.25674	1.64876	0.0991976	0.99988	Up	103
Erythro	Pramef8	2.49309	2.16603	1.31569	1.6463	0.0997024	0.99988	Up	104
Erythro	Abcc5	6.776	1.21427	0.737708	1.646	0.0997639	0.99988	Up	105
Erythro	Snta1	2.27458	2.40847	1.46702	1.64174	0.100643	0.99988	Up	106
Erythro	Gata3	6.16569	1.28515	0.784353	1.63848	0.101321	0.99988	Up	107
Erythro	Ly6c1	380.205	0.346687	0.211603	1.63838	0.101341	0.99988	Up	108
Erythro	Pigyl	20.9551	0.724181	0.442232	1.63756	0.101513	0.99988	Up	109
Erythro	Icam2	227.174	0.314878	0.192474	1.63595	0.10185	0.99988	Up	110
Erythro	E2f5	3.28725	1.76699	1.0818	1.63338	0.10239	0.99988	Up	111
Erythro	Hebp1	23.1217	0.67158	0.41175	1.63104	0.102882	0.99988	Up	112
Erythro	Csgalnact1	6.88737	1.22657	0.753144	1.6286	0.103399	0.99988	Up	113
Erythro	Aqp5	14.5273	0.896205	0.550358	1.6284	0.103439	0.99988	Up	114
Erythro	Slc43a1	2.85481	2.19364	1.34965	1.62534	0.104091	0.99988	Up	115
Erythro	Anxa7	22.3862	0.672511	0.415311	1.6193	0.105383	0.99988	Up	116
Erythro	Ptp4a2	45.9721	0.503867	0.31127	1.61875	0.105502	0.99988	Up	117
Erythro	Arhgef26	8.15232	1.12164	0.695913	1.61175	0.107016	0.99988	Up	118
Erythro	Slc27a4	1.43571	2.78342	1.72847	1.61034	0.107324	0.99988	Up	119
Erythro	Prpsap1	11.9806	0.903875	0.561435	1.60994	0.107412	0.99988	Up	120
Erythro	Dzip3	0.92609	3.18746	1.98332	1.60713	0.108026	0.99988	Up	121
Erythro	Gm21092	9.69503	0.982672	0.611943	1.60582	0.108313	0.99988	Up	122
Erythro	Tmem63a	8.2336	1.04973	0.654327	1.60428	0.108651	0.99988	Up	123
Erythro	Gata1	2.11975	2.30322	1.43708	1.60271	0.108998	0.99988	Up	124
Erythro	Tmem263	5.13197	1.39398	0.870953	1.60053	0.109482	0.99988	Up	125
Erythro	Acta2	122.976	0.388036	0.243046	1.59656	0.110365	0.99988	Up	126
Erythro	Grp	3.50891	1.77892	1.11438	1.59633	0.110416	0.99988	Up	127
Erythro	Gstm1	159.515	0.32599	0.2044	1.59486	0.110743	0.99988	Up	128
Erythro	Olr1	1.8963	2.4735	1.55267	1.59307	0.111145	0.99988	Up	129
Erythro	Aqp1	208.267	0.381842	0.23987	1.59187	0.111414	0.99988	Up	130
Erythro	2510009E07Rik	4.38728	1.46338	0.919638	1.59126	0.111551	0.99988	Up	131
Erythro	Hist1h1b	2.20162	2.45224	1.54209	1.5902	0.111789	0.99988	Up	132
Erythro	Mepce	4.03115	1.52647	0.961023	1.58838	0.112201	0.99988	Up	133
Erythro	Rcbtb2	7.22621	1.15228	0.726459	1.58616	0.112702	0.99988	Up	134
Erythro	Lrrc51	4.19035	1.49388	0.943197	1.58385	0.113228	0.99988	Up	135
Erythro	Krt7	10.0935	0.960324	0.607809	1.57998	0.114112	0.99988	Up	136
Erythro	Fbxo38	4.36551	1.61173	1.02023	1.57978	0.114158	0.99988	Up	137
Erythro	Ltbp1	6.98906	1.16642	0.738953	1.57848	0.114456	0.99988	Up	138
Erythro	Tex9	1.32596	2.72985	1.72943	1.57847	0.114457	0.99988	Up	139
Erythro	Inpp5a	7.97683	1.07549	0.682791	1.57513	0.115226	0.99988	Up	140
Erythro	Usp5	7.24028	1.1456	0.728308	1.57296	0.115729	0.99988	Up	141
Erythro	Nos1ap	3.44781	1.69353	1.07817	1.57075	0.11624	0.99988	Up	142
Erythro	Pigm	3.31771	1.66663	1.0617	1.56978	0.116466	0.99988	Up	143
Erythro	Mta2	10.7869	0.907192	0.578061	1.56937	0.116562	0.99988	Up	144
Erythro	Ube2s	69.5375	0.527767	0.33665	1.5677	0.11695	0.99988	Up	145
Erythro	Rapgef3	4.16876	1.46175	0.935495	1.56254	0.118161	0.99988	Up	146
Erythro	Fxyd3	2.37087	2.22221	1.42641	1.55791	0.119255	0.99988	Up	147
Erythro	Exog	2.14483	2.4253	1.55724	1.55743	0.119368	0.99988	Up	148
Erythro	Gm42418	248.286	0.424804	0.273791	1.55156	0.120767	0.99988	Up	149
Erythro	Tcp11l2	22.6488	0.695034	0.44862	1.54927	0.121316	0.99988	Up	150
Erythro	Ace	94.0749	0.396866	0.256489	1.5473	0.12179	0.99988	Up	151
Erythro	Gtf2f2	5.28786	1.30549	0.843778	1.54719	0.121816	0.99988	Up	152
Erythro	Cpox	8.08702	1.13599	0.735551	1.5444	0.122491	0.99988	Up	153
Erythro	Clic3	11.9435	0.883565	0.572183	1.5442	0.12254	0.99988	Up	154
Erythro	Zfand5	42.4	0.494451	0.320452	1.54298	0.122836	0.99988	Up	155
Erythro	Treml1	3.72939	1.5674	1.01688	1.54137	0.123226	0.99988	Up	156
Erythro	Arhgap19	0.87189	3.12639	2.02936	1.54058	0.123418	0.99988	Up	157
Erythro	Kcnk6	2.19689	2.16485	1.40603	1.53969	0.123636	0.99988	Up	158
Erythro	Fto	10.9075	0.902115	0.586337	1.53856	0.123911	0.99988	Up	159
Erythro	Aldoa	180.236	0.335445	0.218067	1.53827	0.123984	0.99988	Up	160
Erythro	Cln8	4.49881	1.41128	0.918204	1.537	0.124293	0.99988	Up	161
Erythro	Pfkl	10.1514	0.90483	0.589658	1.5345	0.124907	0.99988	Up	162
Erythro	Hmgb2	84.7646	0.48412	0.316061	1.53173	0.125589	0.99988	Up	163
Erythro	Hilpda	170.099	0.407011	0.266101	1.52953	0.126133	0.99988	Up	164
Erythro	Ldha	115.044	0.363012	0.237372	1.52929	0.126192	0.99988	Up	165
Erythro	Ccs	11.2598	0.858517	0.562217	1.52702	0.126756	0.99988	Up	166
Erythro	Tmem45a	2.80372	1.88931	1.23801	1.52609	0.126987	0.99988	Up	167
Erythro	Ppp1r13b	8.47395	0.997506	0.6562	1.52013	0.128479	0.99988	Up	168
Erythro	Insl6	1.73629	2.36522	1.55617	1.5199	0.128537	0.99988	Up	169
Erythro	Amn1	13.3706	0.869149	0.571964	1.51959	0.128615	0.99988	Up	170
Erythro	Srrd	2.63885	1.87672	1.23724	1.51686	0.129302	0.99988	Up	171
Erythro	Slc17a5	2.64019	1.85071	1.22333	1.51284	0.130321	0.99988	Up	172
Erythro	Cd300lf	3.68251	1.64366	1.08692	1.51221	0.130481	0.99988	Up	173
Erythro	E130012A19Rik	0.92868	3.18555	2.11177	1.50847	0.131434	0.99988	Up	174
Erythro	Zfp810	1.36546	2.58483	1.71424	1.50786	0.131591	0.99988	Up	175
Erythro	2310007B03Rik	1.32731	2.70121	1.79227	1.50715	0.131773	0.99988	Up	176
Erythro	Galnt4	4.78039	1.32043	0.876506	1.50647	0.131947	0.99988	Up	177
Erythro	Xdh	20.1599	0.656997	0.436862	1.5039	0.132607	0.99988	Up	178
Erythro	Galnt18	42.1009	0.52073	0.346381	1.50334	0.132751	0.99988	Up	179
Erythro	Ephx1	13.2466	0.841777	0.560683	1.50134	0.133267	0.99988	Up	180
Erythro	Vps37a	6.27652	1.19535	0.796963	1.49988	0.133646	0.99988	Up	181
Erythro	Cd14	3.45951	1.68679	1.12511	1.49923	0.133815	0.99988	Up	182
Erythro	Smad6	24.6724	0.59448	0.396816	1.49812	0.134101	0.99988	Up	183
Erythro	Csf2rb2	2.47588	1.97239	1.31798	1.49653	0.134516	0.99988	Up	184
Erythro	Cldn5	491.206	0.307971	0.205921	1.49558	0.134763	0.99988	Up	185
Erythro	Hopx	6.13413	1.19314	0.798217	1.49476	0.134976	0.99988	Up	186
Erythro	Bhlhe40	9.71289	0.955028	0.639719	1.49289	0.135467	0.99988	Up	187
Erythro	Rab5b	7.61244	1.04597	0.700911	1.4923	0.135619	0.99988	Up	188
Erythro	Fam65a	16.6918	0.713561	0.478447	1.49141	0.135854	0.99988	Up	189
Erythro	Raver2	2.8813	1.73479	1.16698	1.48656	0.13713	0.99988	Up	190
Erythro	Lpl	44.3162	0.477481	0.321288	1.48614	0.137241	0.99988	Up	191
Erythro	Mfsd3	0.82028	3.054	2.05742	1.48439	0.137707	0.99988	Up	192
Erythro	Mtbp	1.22274	2.63068	1.77225	1.48437	0.13771	0.99988	Up	193
Erythro	Slc7a5	12.6827	0.929508	0.62694	1.48261	0.138178	0.99988	Up	194
Erythro	Armcx6	0.878414	3.06999	2.07146	1.48204	0.13833	0.99988	Up	195
Erythro	Asrgl1	5.74083	1.18966	0.803688	1.48026	0.138805	0.99988	Up	196
Erythro	Smc2	11.1392	0.928836	0.628609	1.4776	0.139514	0.99988	Up	197
Erythro	Uaca	11.1665	0.855962	0.580298	1.47504	0.140202	0.99988	Up	198
Erythro	Rtn4	46.58	0.458936	0.31136	1.47397	0.140489	0.99988	Up	199
Erythro	Tk1	4.16659	1.56462	1.06188	1.47344	0.140632	0.99988	Up	200
FB	Mt2	62.0891	2.44678	0.372458	6.56929	5.05565e-11	3.58345e-07	Up	1
FB	Upk3b	17.5376	7.22859	1.24858	5.78947	7.06102e-09	2.50243e-05	Up	2
FB	Dbp	72.492	1.95666	0.354889	5.51343	3.51898e-08	8.31417e-05	Up	3
FB	Tagln	124.439	1.26213	0.258655	4.87957	1.06316e-06	0.00125595	Up	4
FB	Msln	15.3732	6.07267	1.26626	4.79576	1.62059e-06	0.00144698	Up	5
FB	Gpm6a	13.3254	5.08603	1.06087	4.79421	1.63316e-06	0.00144698	Up	6
FB	Mfap4	2381.32	0.677711	0.145274	4.66505	3.08546e-06	0.00242997	Up	7
FB	Ubc	389.766	0.695209	0.149963	4.63587	3.55443e-06	0.00251938	Up	8
FB	Thbs1	73.2871	1.46778	0.333346	4.40318	1.06677e-05	0.0068739	Up	9
FB	Ptgis	212.962	0.845997	0.208569	4.0562	4.98784e-05	0.0288807	Up	10
FB	Ctgf	38.7775	1.37413	0.339954	4.04212	5.29697e-05	0.0288807	Up	11
FB	Adamtsl2	49.8892	1.18323	0.295804	4.00006	6.33252e-05	0.0320606	Up	12
FB	Sfrp4	12.8405	3.16286	0.809497	3.90719	9.33759e-05	0.0441232	Up	13
FB	Gm42418	206.474	0.689546	0.180249	3.82552	0.000130496	0.0578099	Up	14
FB	Ifi205	9.86369	2.83833	0.772581	3.67383	0.000238941	0.0996243	Up	15
FB	Actg1	599.718	0.489155	0.141958	3.44578	0.000569419	0.224224	Up	16
FB	Gpc3	148.372	0.628798	0.188202	3.34108	0.00083453	0.311323	Up	17
FB	Lrrn4	3.43652	4.87726	1.47153	3.31442	0.000918349	NA	Up	18
FB	Nkain4	38.1897	1.14137	0.346916	3.29006	0.00100168	0.354994	Up	19
FB	Clu	46.7502	1.08469	0.332784	3.25943	0.00111638	0.376805	Up	20
FB	Vim	548.751	0.584121	0.18134	3.22113	0.00127687	0.411385	Up	21
FB	Lox	51.233	0.968099	0.305484	3.16907	0.00152928	0.451951	Up	22
FB	Rspo1	7.87463	2.64506	0.836367	3.16256	0.0015639	0.451951	Up	23
FB	Atp1b1	17.0374	1.89229	0.599398	3.15699	0.00159407	0.451951	Up	24
FB	Dpep1	284.445	0.58303	0.190051	3.06776	0.00215667	0.587942	Up	25
FB	Maff	11.937	1.81257	0.604861	2.99666	0.00272951	0.690956	Up	26
FB	Mgp	7442.62	0.388542	0.130832	2.96977	0.00298019	0.722864	Up	27
FB	Smpd3	2.71468	4.51894	1.52791	2.95759	0.0031005	NA	Up	28
FB	Anxa1	182.481	0.689721	0.234773	2.93782	0.00330532	0.755745	Up	29
FB	Cldn15	3.82369	4.03731	1.38209	2.92116	0.00348732	NA	Up	30
FB	Ubb	1167.5	0.373126	0.127948	2.91624	0.0035428	0.765005	Up	31
FB	Mt1	138.685	1.76151	0.60438	2.91458	0.00356168	0.765005	Up	32
FB	Krt19	13.2473	1.78132	0.613904	2.90162	0.00371235	0.769286	Up	33
FB	Ier3	56.6369	0.917193	0.316884	2.89441	0.00379868	0.769286	Up	34
FB	Spink2	2.62837	4.51505	1.57458	2.86746	0.00413776	NA	Up	35
FB	Per3	19.4833	1.44305	0.504784	2.85875	0.00425308	0.820345	Up	36
FB	Gm12840	13.1157	1.73094	0.605947	2.85658	0.00428227	0.820345	Up	37
FB	Wt1	2.68124	4.49426	1.58342	2.83833	0.00453504	NA	Up	38
FB	Tspan4	51.6367	0.87444	0.312718	2.79626	0.00516976	0.964297	Up	39
FB	RP23-4H17.3	21.9728	1.16449	0.422933	2.75337	0.00589858	0.999867	Up	40
FB	Muc16	2.30854	4.30118	1.57998	2.7223	0.00648291	NA	Up	41
FB	Bhlhe41	8.37756	2.1781	0.805477	2.70411	0.00684873	0.999867	Up	42
FB	Serpine1	7.60968	2.05264	0.763997	2.68672	0.00721583	0.999867	Up	43
FB	Irak2	17.0088	1.35566	0.507592	2.67077	0.00756764	0.999867	Up	44
FB	Fmo2	478.038	0.483355	0.181002	2.67044	0.00757514	0.999867	Up	45
FB	Junb	97.6956	0.75814	0.285913	2.65165	0.00801006	0.999867	Up	46
FB	C3	219.875	0.594117	0.225461	2.63512	0.00841066	0.999867	Up	47
FB	Arid5b	40.9612	0.849846	0.326515	2.60278	0.00924719	0.999867	Up	48
FB	Cilp	22.1882	1.42157	0.551004	2.57996	0.00988124	0.999867	Up	49
FB	Fmod	12.2937	1.81874	0.709098	2.56487	0.0103215	0.999867	Up	50
FB	Tmem151a	3.12807	3.73729	1.46702	2.54754	0.0108487	NA	Up	51
FB	Cnn2	150.471	0.583751	0.231719	2.51922	0.0117614	0.999867	Up	52
FB	Glul	89.8436	0.634604	0.252118	2.51709	0.0118328	0.999867	Up	53
FB	Anxa3	46.4929	0.842848	0.335402	2.51295	0.0119728	0.999867	Up	54
FB	Myl12a	364.261	0.389051	0.155439	2.50292	0.0123174	0.999867	Up	55
FB	8430408G22Rik	15.4174	1.57698	0.632846	2.49188	0.0127068	0.999867	Up	56
FB	Fn1	240.2	0.443991	0.178285	2.49034	0.0127621	0.999867	Up	57
FB	Slc1a5	47.3221	0.734107	0.296644	2.47471	0.0133344	0.999867	Up	58
FB	Fam180a	4.44344	2.89055	1.18843	2.43225	0.0150054	NA	Up	59
FB	Gm17501	6.48839	2.12562	0.873991	2.43208	0.0150124	NA	Up	60
FB	Fbln5	68.5792	0.638595	0.265283	2.40722	0.0160745	0.999867	Up	61
FB	Mpp6	13.4348	1.39187	0.582948	2.38765	0.0169565	0.999867	Up	62
FB	Tef	24.5033	1.11572	0.468606	2.38092	0.0172693	0.999867	Up	63
FB	Txnip	97.8718	0.570292	0.241336	2.36306	0.0181246	0.999867	Up	64
FB	Lima1	35.3452	0.831954	0.352657	2.3591	0.0183192	0.999867	Up	65
FB	Rgcc	32.9632	0.80382	0.341067	2.35678	0.0184342	0.999867	Up	66
FB	Adamts1	44.0872	0.736284	0.314309	2.34255	0.0191527	0.999867	Up	67
FB	Rgs2	112.947	0.694498	0.298717	2.32494	0.0200753	0.999867	Up	68
FB	Lgals1	763.304	0.333588	0.143504	2.32459	0.0200937	0.999867	Up	69
FB	Vit	4.91298	2.4398	1.05049	2.32254	0.0202039	NA	Up	70
FB	Bgn	1039.62	0.326435	0.141815	2.30183	0.0213448	0.999867	Up	71
FB	Ager	46.2297	0.897773	0.391757	2.29166	0.0219253	0.999867	Up	72
FB	Ankrd37	35.3353	0.948665	0.41716	2.27411	0.0229596	0.999867	Up	73
FB	Rarres2	491.359	0.353777	0.155592	2.27374	0.0229816	0.999867	Up	74
FB	Col6a2	143.629	0.491667	0.216962	2.26615	0.0234425	0.999867	Up	75
FB	Lims2	31.5299	0.806829	0.357247	2.25846	0.0239168	0.999867	Up	76
FB	Por	53.6825	0.661388	0.294685	2.24438	0.0248077	0.999867	Up	77
FB	Dfna5	5.25807	2.18198	0.973698	2.24092	0.0250312	NA	Up	78
FB	Ace	51.449	0.688851	0.307483	2.24029	0.0250722	0.999867	Up	79
FB	Myl7	1.77912	3.96887	1.77238	2.23929	0.025137	NA	Up	80
FB	Ifrd1	80.8289	0.564578	0.25296	2.23188	0.0256226	0.999867	Up	81
FB	Edn1	24.3819	0.969975	0.434981	2.22993	0.0257524	0.999867	Up	82
FB	Pepd	8.91785	1.50051	0.673054	2.2294	0.0257875	0.999867	Up	83
FB	Bpifa1	2.72369	3.50935	1.57622	2.22644	0.025985	NA	Up	84
FB	Mettl6	14.2589	1.17026	0.527205	2.21974	0.0264365	0.999867	Up	85
FB	Daglb	10.8091	1.3106	0.602639	2.17476	0.029648	0.999867	Up	86
FB	Adam23	4.78676	2.12819	0.980732	2.17001	0.0300064	NA	Up	87
FB	Cd200	45.4006	0.655431	0.302216	2.16875	0.0301017	0.999867	Up	88
FB	Bcam	25.1036	0.922402	0.427453	2.1579	0.0309356	0.999867	Up	89
FB	Cdo1	314.135	0.425691	0.198067	2.14923	0.0316163	0.999867	Up	90
FB	Abca8b	10.0967	1.349	0.632851	2.13162	0.0330381	0.999867	Up	91
FB	2410022M11Rik	5.8753	1.83094	0.862083	2.12385	0.0336825	NA	Up	92
FB	Cox5b	148.246	0.404556	0.190923	2.11895	0.0340949	0.999867	Up	93
FB	Slc9a3r1	9.50683	1.42618	0.673996	2.11601	0.0343439	0.999867	Up	94
FB	Tpm4	144.494	0.44164	0.209376	2.10932	0.0349169	0.999867	Up	95
FB	Igfbp7	1794.18	0.274054	0.130046	2.10737	0.0350858	0.999867	Up	96
FB	Entpd2	34.9235	0.758189	0.360574	2.10273	0.0354895	0.999867	Up	97
FB	Lxn	49.0337	0.608278	0.290041	2.09721	0.0359751	0.999867	Up	98
FB	Prdx6	171.86	0.421026	0.200933	2.09536	0.036139	0.999867	Up	99
FB	Mmrn1	2.45738	3.4233	1.63696	2.09126	0.0365049	NA	Up	100
FB	Sult5a1	22.7711	0.922587	0.441596	2.08921	0.0366888	0.999867	Up	101
FB	Higd1b	3.12882	2.93803	1.41082	2.08249	0.0372979	NA	Up	102
FB	Nr1d2	15.1307	1.09151	0.524952	2.07926	0.0375931	0.999867	Up	103
FB	F11r	6.60694	1.65196	0.794739	2.07862	0.0376519	NA	Up	104
FB	Clic3	5.48765	1.98008	0.952741	2.0783	0.037682	NA	Up	105
FB	Ephx1	21.7826	0.934303	0.45161	2.06883	0.0385622	0.999867	Up	106
FB	Fhl1	485.441	0.351471	0.170128	2.06592	0.0388359	0.999867	Up	107
FB	Abca6	4.75599	1.96566	0.957765	2.05234	0.0401366	NA	Up	108
FB	Pllp	8.96147	1.3852	0.676925	2.04632	0.0407249	0.999867	Up	109
FB	Lgals7	2.55188	3.34223	1.63353	2.04602	0.0407547	NA	Up	110
FB	Ddt	44.0187	0.62643	0.30683	2.04162	0.0411893	0.999867	Up	111
FB	B130006D01Rik	2.16372	3.11504	1.52971	2.03636	0.0417139	NA	Up	112
FB	Des	27.823	0.858564	0.421689	2.03601	0.0417492	0.999867	Up	113
FB	Flt1	19.7003	0.909204	0.449545	2.0225	0.0431246	0.999867	Up	114
FB	Adam33	10.8974	1.25723	0.623984	2.01484	0.0439219	0.999867	Up	115
FB	Serpinf1	139.874	0.560431	0.279569	2.00462	0.0450035	0.999867	Up	116
FB	Ly6c1	172.48	0.426136	0.212597	2.00443	0.0450243	0.999867	Up	117
FB	Galns	7.09814	1.52554	0.76523	1.99357	0.0461986	0.999867	Up	118
FB	Vkorc1l1	7.76678	1.42969	0.719747	1.98637	0.0469921	0.999867	Up	119
FB	Npr3	6.53343	1.58497	0.799402	1.9827	0.0474012	NA	Up	120
FB	Cdkn2b	2.08388	3.04915	1.54476	1.97387	0.0483966	NA	Up	121
FB	Acta2	135.283	0.995155	0.504658	1.97194	0.0486163	0.999867	Up	122
FB	BC028528	48.4694	0.590528	0.301208	1.96053	0.0499338	0.999867	Up	123
FB	Inmt	2394.09	0.338106	0.173152	1.95265	0.0508612	0.999867	Up	124
FB	Gja1	8.12377	1.40897	0.721575	1.95262	0.0508642	0.999867	Up	125
FB	Elp3	6.79937	1.50508	0.773375	1.94612	0.0516408	0.999867	Up	126
FB	Fcor	4.19312	2.20202	1.13233	1.94468	0.0518131	NA	Up	127
FB	Smim4	95.3394	0.437389	0.225409	1.94042	0.0523283	0.999867	Up	128
FB	Fst	5.85494	1.67369	0.868595	1.92689	0.0539927	NA	Up	129
FB	Hspbap1	2.063	3.09067	1.60829	1.9217	0.054643	NA	Up	130
FB	Eif2s3y	25.3738	0.780034	0.406336	1.91968	0.0548986	0.999867	Up	131
FB	Ptrf	74.9683	0.47107	0.245716	1.91713	0.0552214	0.999867	Up	132
FB	Col4a2	55.9591	0.521708	0.273401	1.90822	0.0563628	0.999867	Up	133
FB	Klf6	84.3157	0.466749	0.245829	1.89867	0.0576079	0.999867	Up	134
FB	Atp5b	184.514	0.362259	0.191053	1.89611	0.0579452	0.999867	Up	135
FB	Akap1	4.47571	1.85443	0.979785	1.89269	0.0583994	NA	Up	136
FB	Postn	14.0408	1.21139	0.640464	1.89142	0.0585679	0.999867	Up	137
FB	Snta1	17.1722	0.969032	0.512689	1.8901	0.0587449	0.999867	Up	138
FB	Zbtb26	2.54941	2.55578	1.35438	1.88705	0.0591538	NA	Up	139
FB	Alg11	4.95136	1.71548	0.909545	1.88609	0.0592831	NA	Up	140
FB	Epb41	11.4575	1.09427	0.580939	1.88362	0.0596161	0.999867	Up	141
FB	Cldn10	5.369	1.7355	0.92299	1.8803	0.0600667	NA	Up	142
FB	Cyb561	13.5329	1.02472	0.545895	1.87714	0.0604983	0.999867	Up	143
FB	Lrfn3	2.47149	2.53377	1.35072	1.87587	0.0606736	NA	Up	144
FB	Man1c1	4.41221	1.92772	1.03469	1.86308	0.0624507	NA	Up	145
FB	Il3ra	16.1722	0.890025	0.479995	1.85424	0.0637049	0.999867	Up	146
FB	Fibin	53.1163	0.551101	0.297387	1.85314	0.0638621	0.999867	Up	147
FB	Lrrc51	1.91535	2.92125	1.59143	1.83561	0.0664153	NA	Up	148
FB	Bace2	35.7778	0.771455	0.420542	1.83443	0.0665904	0.999867	Up	149
FB	Psmd14	19.1477	0.821617	0.44838	1.83241	0.0668899	0.999867	Up	150
FB	Scap	13.8803	0.946788	0.519163	1.82368	0.0682004	0.999867	Up	151
FB	Gpi1	46.82	0.60098	0.329979	1.82127	0.0685661	0.999867	Up	152
FB	Hebp1	17.599	0.844666	0.463869	1.82092	0.0686196	0.999867	Up	153
FB	Myl6	480.314	0.273608	0.150786	1.81455	0.0695932	0.999867	Up	154
FB	Ttyh2	1.30417	3.49178	1.92495	1.81396	0.0696839	NA	Up	155
FB	Psmc4	41.6894	0.577283	0.318725	1.81123	0.070106	0.999867	Up	156
FB	Exoc5	10.5888	1.07353	0.592746	1.81111	0.0701237	0.999867	Up	157
FB	Timp2	425.46	0.351906	0.194342	1.81075	0.070179	0.999867	Up	158
FB	Rgs3	26.1628	0.711462	0.393076	1.80998	0.0702982	0.999867	Up	159
FB	AU021092	4.11178	2.16568	1.19981	1.80502	0.0710714	NA	Up	160
FB	Alad	10.5636	1.1311	0.629346	1.79726	0.0722936	0.999867	Up	161
FB	Xab2	9.20362	1.18395	0.659027	1.79652	0.0724122	0.999867	Up	162
FB	Tnfsf13os	1.17747	3.32135	1.85182	1.79356	0.072883	NA	Up	163
FB	Vgll3	27.3943	0.724462	0.406438	1.78247	0.0746728	0.999867	Up	164
FB	Aldh1a3	3.31611	2.28636	1.28573	1.77825	0.0753624	NA	Up	165
FB	Zfc3h1	9.43349	1.13645	0.641232	1.77229	0.0763464	0.999867	Up	166
FB	Cadm1	10.0084	1.1008	0.621193	1.77207	0.0763832	0.999867	Up	167
FB	Ifngr1	199.082	0.337471	0.190496	1.77154	0.0764706	0.999867	Up	168
FB	Pdzd2	65.4387	0.474615	0.26819	1.7697	0.0767777	0.999867	Up	169
FB	Igfbp2	5.5337	1.56341	0.884398	1.76777	0.0770989	NA	Up	170
FB	Mapk3	90.642	0.407675	0.230808	1.7663	0.0773464	0.999867	Up	171
FB	Mcam	5.58664	1.46736	0.831886	1.76389	0.0777501	NA	Up	172
FB	Tnnt1	1.18249	3.37778	1.91875	1.76041	0.0783389	NA	Up	173
FB	Sult1a1	15.4389	0.88973	0.505752	1.75922	0.0785397	0.999867	Up	174
FB	Tyw1	4.86353	1.64413	0.935711	1.75709	0.0789021	NA	Up	175
FB	Fkbp7	80.848	0.416261	0.236972	1.75659	0.0789884	0.999867	Up	176
FB	Mtch2	65.4657	0.464979	0.265747	1.74971	0.0801687	0.999867	Up	177
FB	Ccl7	1.86232	2.85779	1.63546	1.74739	0.0805692	NA	Up	178
FB	Arl2bp	39.0911	0.558005	0.319427	1.7469	0.0806551	0.999867	Up	179
FB	Rbpms	68.7887	0.445304	0.255115	1.7455	0.0808976	0.999867	Up	180
FB	BC037039	2.28911	2.39794	1.3748	1.7442	0.0811238	NA	Up	181
FB	Smim24	1.77982	2.80532	1.6128	1.73941	0.0819631	NA	Up	182
FB	Bhlhe40	16.5333	0.847016	0.487554	1.73728	0.0823381	0.999867	Up	183
FB	Cxcl13	19.2227	4.40314	2.53462	1.7372	0.0823519	0.999867	Up	184
FB	Heph	6.00867	1.3907	0.802642	1.73265	0.0831571	NA	Up	185
FB	Mark4	4.587	1.60371	0.927987	1.72816	0.0839589	NA	Up	186
FB	Ms4a4d	124.907	0.351384	0.203334	1.72811	0.0839676	0.999867	Up	187
FB	Figf	149.608	0.377389	0.218507	1.72713	0.0841448	0.999867	Up	188
FB	Ocln	1.70945	2.81285	1.62916	1.72656	0.084246	NA	Up	189
FB	Msantd3	3.75589	1.91936	1.11299	1.7245	0.084617	NA	Up	190
FB	Dusp3	26.8143	0.70826	0.410767	1.72424	0.0846646	0.999867	Up	191
FB	Ptpn21	4.21393	1.74078	1.01179	1.72049	0.0853438	NA	Up	192
FB	Itga9	13.1903	0.906267	0.528413	1.71507	0.0863319	0.999867	Up	193
FB	Ccl11	41.7549	0.588632	0.343249	1.71488	0.0863669	0.999867	Up	194
FB	Gm20342	6.82509	1.27924	0.74613	1.7145	0.0864366	0.999867	Up	195
FB	Ciart	2.86935	2.37121	1.3852	1.71182	0.0869294	NA	Up	196
FB	Epas1	92.5769	0.514717	0.300873	1.71075	0.0871281	0.999867	Up	197
FB	Lrp2	1.69295	2.80209	1.63831	1.71036	0.0872002	NA	Up	198
FB	Zfp65	3.81954	1.98774	1.163	1.70915	0.0874232	NA	Up	199
FB	S100a11	393.165	0.263464	0.154164	1.70898	0.0874541	0.999867	Up	200
LymEndo	Stmn1	24.7826	2.84725	0.605398	4.70311	2.56229e-06	0.0287309	Up	1
LymEndo	Ube2c	3.57336	5.16178	1.48486	3.47627	0.000508432	0.999827	Up	2
LymEndo	Top2a	5.99855	4.82321	1.40718	3.42756	0.000609028	0.999827	Up	3
LymEndo	Cenpf	5.63897	4.68252	1.38739	3.37507	0.000737976	0.999827	Up	4
LymEndo	Cks2	3.4161	5.02266	1.52025	3.30383	0.000953734	0.999827	Up	5
LymEndo	Tubb5	69.7222	1.12124	0.351644	3.18858	0.00142974	0.999827	Up	6
LymEndo	Wdr89	49.0286	0.943031	0.334876	2.81606	0.00486161	0.999827	Up	7
LymEndo	Rplp0	191.649	0.534408	0.192391	2.77772	0.0054741	0.999827	Up	8
LymEndo	Npnt	8.21637	2.18368	0.79888	2.73343	0.0062679	0.999827	Up	9
LymEndo	H2afz	46.1101	0.970875	0.35624	2.72534	0.00642358	0.999827	Up	10
LymEndo	Sparc	61.905	0.828775	0.307233	2.69754	0.00698532	0.999827	Up	11
LymEndo	2810417H13Rik	4.63091	3.80475	1.41739	2.68434	0.00726722	0.999827	Up	12
LymEndo	Bok	20.8685	1.25641	0.471988	2.66195	0.00776886	0.999827	Up	13
LymEndo	Spc24	2.35664	4.44704	1.69814	2.61878	0.00882461	0.999827	Up	14
LymEndo	Tcf19	2.58569	4.56145	1.74764	2.61006	0.00905252	0.999827	Up	15
LymEndo	Hmgb2	14.5135	1.67487	0.645644	2.5941	0.00948376	0.999827	Up	16
LymEndo	Cfh	11.993	1.63791	0.640537	2.55709	0.0105552	0.999827	Up	17
LymEndo	Nupr1	14.0544	1.45594	0.572031	2.54521	0.0109212	0.999827	Up	18
LymEndo	Tuba1b	44.3765	0.969011	0.381986	2.53677	0.011188	0.999827	Up	19
LymEndo	Olfml2a	4.13257	3.01853	1.18992	2.53675	0.0111888	0.999827	Up	20
LymEndo	Rps2	162.584	0.645316	0.257559	2.50551	0.0122276	0.999827	Up	21
LymEndo	Hmgn2	12.7837	1.5698	0.628039	2.49953	0.0124358	0.999827	Up	22
LymEndo	Ncapd2	1.96865	4.26189	1.71558	2.48423	0.0129832	0.999827	Up	23
LymEndo	Birc5	3.91514	3.27626	1.32333	2.47577	0.0132951	0.999827	Up	24
LymEndo	Serinc3	66.0579	0.745648	0.310064	2.40482	0.0161806	0.999827	Up	25
LymEndo	Ndufc2	36.3336	0.83017	0.358047	2.31861	0.0204163	0.999827	Up	26
LymEndo	Zfos1	6.86142	1.94491	0.839767	2.31601	0.0205578	0.999827	Up	27
LymEndo	Nusap1	1.68717	4.0662	1.782	2.28181	0.0225004	0.999827	Up	28
LymEndo	Vim	113.183	0.600766	0.266321	2.2558	0.0240834	0.999827	Up	29
LymEndo	Cenpa	4.98486	2.27626	1.01531	2.24193	0.0249656	0.999827	Up	30
LymEndo	Rpl22l1	66.7377	0.672933	0.304044	2.21328	0.0268785	0.999827	Up	31
LymEndo	Ddx19a	1.69253	3.99159	1.82567	2.18637	0.0287884	0.999827	Up	32
LymEndo	Por	2.28626	3.45592	1.5928	2.16971	0.0300288	0.999827	Up	33
LymEndo	Cep19	1.48217	3.93766	1.83707	2.14345	0.0320771	0.999827	Up	34
LymEndo	Rpsa	92.4311	0.521565	0.248433	2.09942	0.0357799	0.999827	Up	35
LymEndo	Mrpl19	2.42189	3.32259	1.59432	2.08402	0.0371586	0.999827	Up	36
LymEndo	H2afx	4.24722	2.26968	1.10057	2.06228	0.0391815	0.999827	Up	37
LymEndo	Casp7	1.47849	3.81049	1.84844	2.06147	0.0392586	0.999827	Up	38
LymEndo	Knstrn	1.49987	3.85022	1.86986	2.0591	0.0394851	0.999827	Up	39
LymEndo	Mxd3	1.58233	3.86846	1.88095	2.05665	0.0397195	0.999827	Up	40
LymEndo	Rpl3	146.613	0.444006	0.21756	2.04084	0.0412666	0.999827	Up	41
LymEndo	Smc1a	7.90594	1.48306	0.729115	2.03405	0.0419465	0.999827	Up	42
LymEndo	Spp1	4.37099	2.85026	1.40459	2.02925	0.0424326	0.999827	Up	43
LymEndo	Mxd4	23.0723	0.864748	0.428271	2.01916	0.0434704	0.999827	Up	44
LymEndo	Smyd2	7.64879	1.50648	0.749592	2.00973	0.0444597	0.999827	Up	45
LymEndo	Gnb2l1	44.31	0.658788	0.329026	2.00224	0.0452594	0.999827	Up	46
LymEndo	Lancl1	2.07295	3.25355	1.63111	1.99468	0.0460776	0.999827	Up	47
LymEndo	Rplp2	152.961	0.521976	0.262994	1.98475	0.0471726	0.999827	Up	48
LymEndo	Rps12	94.2756	0.500863	0.253786	1.97356	0.0484316	0.999827	Up	49
LymEndo	Fnip1	2.26563	3.19904	1.62266	1.97148	0.0486694	0.999827	Up	50
LymEndo	Rrm1	1.89826	3.28635	1.67298	1.96437	0.0494872	0.999827	Up	51
LymEndo	Eef2	87.5303	0.52809	0.269344	1.96066	0.0499192	0.999827	Up	52
LymEndo	Colgalt1	3.66686	2.24305	1.161	1.932	0.0533597	0.999827	Up	53
LymEndo	Rassf4	1.28584	3.65357	1.9044	1.91848	0.0550497	0.999827	Up	54
LymEndo	Shmt2	1.84584	3.19476	1.66629	1.91728	0.0552019	0.999827	Up	55
LymEndo	Fam69b	3.08288	2.47213	1.28997	1.91642	0.0553111	0.999827	Up	56
LymEndo	Tubb6	8.8526	1.4212	0.750317	1.89414	0.0582068	0.999827	Up	57
LymEndo	Scn1b	28.0712	0.740793	0.39241	1.88781	0.0590521	0.999827	Up	58
LymEndo	Il33	2.51505	2.84053	1.50504	1.88734	0.0591142	0.999827	Up	59
LymEndo	Plxnd1	5.03288	1.77158	0.941258	1.88214	0.0598166	0.999827	Up	60
LymEndo	Rps20	125.024	0.437725	0.232832	1.88	0.0601075	0.999827	Up	61
LymEndo	Stab2	5.13139	1.73638	0.932828	1.86142	0.0626851	0.999827	Up	62
LymEndo	Rps9	168.722	0.36781	0.198284	1.85497	0.0636004	0.999827	Up	63
LymEndo	Itm2a	12.331	1.10218	0.597084	1.84593	0.0649017	0.999827	Up	64
LymEndo	Mgat4b	5.68239	1.60962	0.875122	1.83931	0.0658702	0.999827	Up	65
LymEndo	Fbxo5	1.26446	3.6153	1.97206	1.83326	0.0667637	0.999827	Up	66
LymEndo	Fam64a	1.30086	3.59959	1.96634	1.8306	0.0671596	0.999827	Up	67
LymEndo	Haghl	3.19908	2.27614	1.2489	1.82251	0.0683777	0.999827	Up	68
LymEndo	Mad1l1	2.61428	2.60297	1.43179	1.81798	0.0690668	0.999827	Up	69
LymEndo	Coq10a	1.26714	3.55836	1.95732	1.81797	0.0690686	0.999827	Up	70
LymEndo	Dbn1	1.19702	3.53702	1.95178	1.8122	0.0699548	0.999827	Up	71
LymEndo	Cgrrf1	3.12721	2.29722	1.2737	1.80358	0.0712972	0.999827	Up	72
LymEndo	Ttc28	4.75603	1.6917	0.943762	1.79251	0.0730513	0.999827	Up	73
LymEndo	Ccna2	1.33726	3.59277	2.00801	1.78922	0.0735794	0.999827	Up	74
LymEndo	Frmd4a	1.76044	2.98517	1.68064	1.77621	0.0756984	0.999827	Up	75
LymEndo	Mis18bp1	1.1633	3.49846	1.97143	1.77458	0.0759677	0.999827	Up	76
LymEndo	Gas1	2.80933	2.34788	1.32806	1.76791	0.0770763	0.999827	Up	77
LymEndo	Cct4	14.453	0.963285	0.544918	1.76776	0.077101	0.999827	Up	78
LymEndo	Hax1	4.12422	1.86022	1.05442	1.76421	0.0776973	0.999827	Up	79
LymEndo	Eef1a1	252.135	0.384166	0.218076	1.76162	0.0781339	0.999827	Up	80
LymEndo	Ccdc34	6.14068	1.48861	0.84726	1.75697	0.0789221	0.999827	Up	81
LymEndo	Ninj1	10.2748	1.09786	0.627853	1.74859	0.0803624	0.999827	Up	82
LymEndo	Creb3l2	5.00113	1.65232	0.949196	1.74076	0.0817262	0.999827	Up	83
LymEndo	Ddx27	1.63449	2.99443	1.72139	1.73954	0.0819402	0.999827	Up	84
LymEndo	Rnf38	1.09318	3.47751	2.00387	1.73539	0.0826711	0.999827	Up	85
LymEndo	Rpl29	98.6871	0.424587	0.246811	1.72029	0.0853792	0.999827	Up	86
LymEndo	Thrsp	4.31052	1.87072	1.08806	1.71933	0.0855552	0.999827	Up	87
LymEndo	Pofut1	1.60077	2.96519	1.72607	1.71788	0.0858176	0.999827	Up	88
LymEndo	Lynx1	2.70817	2.2918	1.33689	1.71428	0.0864774	0.999827	Up	89
LymEndo	Aurkb	1.14192	3.45474	2.02733	1.70408	0.0883657	0.999827	Up	90
LymEndo	Sugt1	8.60946	1.18089	0.694965	1.6992	0.0892806	0.999827	Up	91
LymEndo	Psme2	9.86124	1.10056	0.648361	1.69745	0.0896118	0.999827	Up	92
LymEndo	Sfxn1	2.31779	2.47749	1.46094	1.69582	0.0899191	0.999827	Up	93
LymEndo	Znrd1as	1.1082	3.41062	2.01186	1.69525	0.0900273	0.999827	Up	94
LymEndo	Cdk1	1.1082	3.41062	2.01186	1.69525	0.0900273	0.999827	Up	95
LymEndo	Rpl28	90.5068	0.44025	0.260092	1.69267	0.0905188	0.999827	Up	96
LymEndo	Csrp2bp	1.17832	3.4372	2.03191	1.69161	0.0907196	0.999827	Up	97
LymEndo	Cdkn2c	6.67094	1.42783	0.845683	1.68838	0.091339	0.999827	Up	98
LymEndo	Gm17619	2.2707	2.52053	1.49685	1.68388	0.0922039	0.999827	Up	99
LymEndo	Plekhf1	1.53065	2.95469	1.75606	1.68257	0.0924588	0.999827	Up	100
LymEndo	Tdg	1.53065	2.95469	1.75606	1.68257	0.0924588	0.999827	Up	101
LymEndo	Gtpbp8	1.10552	3.47155	2.0637	1.6822	0.0925309	0.999827	Up	102
LymEndo	Emid1	8.16844	1.28743	0.765551	1.6817	0.0926265	0.999827	Up	103
LymEndo	Hist1h2ap	9.26924	6.53397	3.91148	1.67046	0.0948284	0.999827	Up	104
LymEndo	Kctd12	24.4753	0.811522	0.48614	1.66932	0.0950545	0.999827	Up	105
LymEndo	Ppp1r14b	11.3521	1.01489	0.609824	1.66423	0.0960657	0.999827	Up	106
LymEndo	Ttc17	1.07448	3.36777	2.02477	1.66328	0.0962556	0.999827	Up	107
LymEndo	mt-Nd1	287.086	0.336449	0.202452	1.66188	0.0965378	0.999827	Up	108
LymEndo	Lockd	1.57939	2.9306	1.76605	1.6594	0.0970343	0.999827	Up	109
LymEndo	Tpx2	1.0905	3.52135	2.12325	1.65847	0.097223	0.999827	Up	110
LymEndo	Itpk1	2.71886	2.21387	1.34708	1.64345	0.100289	0.999827	Up	111
LymEndo	Ndufaf2	3.33803	1.89896	1.16074	1.63599	0.101842	0.999827	Up	112
LymEndo	Srek1	2.28572	2.47564	1.51953	1.62922	0.103267	0.999827	Up	113
LymEndo	Ptx3	14.8064	0.947486	0.581643	1.62898	0.103317	0.999827	Up	114
LymEndo	Rpl9-ps6	20.6506	0.729121	0.447954	1.62767	0.103595	0.999827	Up	115
LymEndo	Hbp1	6.53985	1.26002	0.783284	1.60864	0.107695	0.999827	Up	116
LymEndo	Rpl13a	255.802	0.301162	0.187253	1.60831	0.107766	0.999827	Up	117
LymEndo	Rgs12	2.70181	2.24157	1.3944	1.60755	0.107933	0.999827	Up	118
LymEndo	Foxm1	1.13924	3.51223	2.1865	1.60632	0.108204	0.999827	Up	119
LymEndo	Phtf1	1.66628	2.77908	1.7416	1.5957	0.110555	0.999827	Up	120
LymEndo	Dapk3	3.35305	1.86771	1.1727	1.59266	0.111237	0.999827	Up	121
LymEndo	Gprc5b	6.18823	1.3024	0.820112	1.58807	0.11227	0.999827	Up	122
LymEndo	Rps12-ps3	17.8001	0.784735	0.494293	1.58759	0.112379	0.999827	Up	123
LymEndo	Sapcd1	1.21472	3.45299	2.18459	1.58061	0.113968	0.999827	Up	124
LymEndo	Stab1	30.0862	0.60647	0.384755	1.57625	0.114969	0.999827	Up	125
LymEndo	Pld5	3.31739	1.80059	1.14332	1.57488	0.115284	0.999827	Up	126
LymEndo	Impdh2	6.58305	1.25308	0.798667	1.56896	0.116657	0.999827	Up	127
LymEndo	Pabpc1	37.409	0.585005	0.373112	1.56791	0.116903	0.999827	Up	128
LymEndo	Gtpbp2	6.36731	1.40046	0.893752	1.56694	0.117129	0.999827	Up	129
LymEndo	Trpc4ap	2.76033	1.9859	1.2688	1.56519	0.117539	0.999827	Up	130
LymEndo	Rps26	87.5665	0.399644	0.2555	1.56417	0.117778	0.999827	Up	131
LymEndo	Dapp1	1.01938	3.27373	2.0965	1.56152	0.118401	0.999827	Up	132
LymEndo	Ccnb2	1.01938	3.27373	2.0965	1.56152	0.118401	0.999827	Up	133
LymEndo	Tmem259	1.95015	2.39326	1.53888	1.5552	0.119899	0.999827	Up	134
LymEndo	Klf13	17.3379	0.748051	0.481351	1.55407	0.120169	0.999827	Up	135
LymEndo	As3mt	2.02295	2.35235	1.51851	1.54912	0.121353	0.999827	Up	136
LymEndo	Armcx4	1.11088	3.36726	2.17441	1.54859	0.121481	0.999827	Up	137
LymEndo	Cdca8	1.52697	2.81224	1.81642	1.54823	0.121567	0.999827	Up	138
LymEndo	Mki67	4.10002	4.17132	2.69495	1.54783	0.121664	0.999827	Up	139
LymEndo	H1f0	22.3618	0.715362	0.462475	1.54681	0.121909	0.999827	Up	140
LymEndo	Pltp	6.13176	1.26386	0.819861	1.54155	0.123182	0.999827	Up	141
LymEndo	Hps4	0.985662	3.22428	2.09229	1.54103	0.12331	0.999827	Up	142
LymEndo	Mfsd5	1.42313	2.76084	1.79302	1.53977	0.123615	0.999827	Up	143
LymEndo	Mplkip	2.57762	2.07026	1.34632	1.53772	0.124118	0.999827	Up	144
LymEndo	Hjurp	19.2768	0.734608	0.4779	1.53716	0.124255	0.999827	Up	145
LymEndo	Esco2	1.05578	3.2564	2.12471	1.53263	0.125367	0.999827	Up	146
LymEndo	Gins4	2.17655	2.29243	1.49701	1.53134	0.125686	0.999827	Up	147
LymEndo	Prelid1	15.8597	0.791876	0.517961	1.52883	0.126306	0.999827	Up	148
LymEndo	Ezh2	2.46041	2.39183	1.56772	1.52567	0.127091	0.999827	Up	149
LymEndo	Fam117a	1.40543	2.86604	1.88643	1.51929	0.128689	0.999827	Up	150
LymEndo	Sf3a2	3.40087	1.79641	1.18405	1.51718	0.129221	0.999827	Up	151
LymEndo	Rplp1	177.752	0.332208	0.219142	1.51595	0.129532	0.999827	Up	152
LymEndo	Nrp2	31.6165	0.590808	0.391123	1.51054	0.130905	0.999827	Up	153
LymEndo	Fundc2	19.4611	0.733417	0.485569	1.51043	0.130934	0.999827	Up	154
LymEndo	Ppp2cb	2.44172	2.09109	1.38449	1.51037	0.130949	0.999827	Up	155
LymEndo	Man1c1	1.61386	2.64414	1.75349	1.50793	0.131572	0.999827	Up	156
LymEndo	Krt19	0.915543	3.20052	2.12249	1.50791	0.131578	0.999827	Up	157
LymEndo	Klrb1c	0.915543	3.20052	2.12249	1.50791	0.131578	0.999827	Up	158
LymEndo	Mt1	5.11562	1.49957	0.994786	1.50743	0.1317	0.999827	Up	159
LymEndo	Smc5	1.93145	2.31448	1.53603	1.5068	0.131862	0.999827	Up	160
LymEndo	Hist1h2ae	1.0531	3.33183	2.21322	1.50542	0.132216	0.999827	Up	161
LymEndo	Prc1	1.56069	2.86232	1.90348	1.50373	0.132651	0.999827	Up	162
LymEndo	Cxcl15	7.27638	1.19416	0.794462	1.50311	0.13281	0.999827	Up	163
LymEndo	Hist1h1b	1.0895	3.32176	2.21266	1.50125	0.133291	0.999827	Up	164
LymEndo	Tcirg1	2.19496	2.29911	1.53163	1.50109	0.133333	0.999827	Up	165
LymEndo	Pdgfd	2.27844	2.21244	1.47748	1.49744	0.134278	0.999827	Up	166
LymEndo	Map3k11	3.47533	1.68143	1.12362	1.49644	0.134539	0.999827	Up	167
LymEndo	Trim59	0.951942	3.17718	2.12875	1.49251	0.135565	0.999827	Up	168
LymEndo	Stx11	0.951942	3.17718	2.12875	1.49251	0.135565	0.999827	Up	169
LymEndo	Dhfr	0.951942	3.17718	2.12875	1.49251	0.135565	0.999827	Up	170
LymEndo	Suz12	2.03797	2.29765	1.5457	1.48648	0.137153	0.999827	Up	171
LymEndo	Emp2	6.30277	1.34652	0.90588	1.48642	0.137167	0.999827	Up	172
LymEndo	Nlrc3	1.31929	2.71587	1.82756	1.48606	0.137263	0.999827	Up	173
LymEndo	Cited4	2.12145	2.22907	1.50961	1.47658	0.139788	0.999827	Up	174
LymEndo	Gm42418	39.4769	0.570162	0.386321	1.47588	0.139977	0.999827	Up	175
LymEndo	Nceh1	2.97215	1.81313	1.23332	1.47012	0.14153	0.999827	Up	176
LymEndo	Ehmt2	2.24565	2.16188	1.47135	1.46932	0.141747	0.999827	Up	177
LymEndo	Ino80	0.881824	3.15131	2.15052	1.46537	0.14282	0.999827	Up	178
LymEndo	Cd244	0.881824	3.15131	2.15052	1.46537	0.14282	0.999827	Up	179
LymEndo	Rpl32	210.222	0.278848	0.19085	1.46108	0.143992	0.999827	Up	180
LymEndo	Ripk1	2.00425	2.27116	1.55527	1.4603	0.144207	0.999827	Up	181
LymEndo	Rtn4	13.007	0.820442	0.563841	1.4551	0.145643	0.999827	Up	182
LymEndo	Ddost	10.6882	0.912398	0.632157	1.44331	0.148934	0.999827	Up	183
LymEndo	Rps6	182.415	0.281978	0.195611	1.44153	0.149436	0.999827	Up	184
LymEndo	Cdkn2d	3.65802	1.66118	1.15553	1.43759	0.15055	0.999827	Up	185
LymEndo	Kmt2a	2.72098	1.8102	1.25935	1.43741	0.150601	0.999827	Up	186
LymEndo	Rpl10a	78.4011	0.38642	0.269113	1.4359	0.15103	0.999827	Up	187
LymEndo	Mttp	1.02206	3.22532	2.24667	1.4356	0.151116	0.999827	Up	188
LymEndo	Gm15635	1.02206	3.22532	2.24667	1.4356	0.151116	0.999827	Up	189
LymEndo	Ttll1	3.17615	1.67507	1.16721	1.43511	0.151257	0.999827	Up	190
LymEndo	Fam189b	1.40443	2.66392	1.85916	1.43286	0.151898	0.999827	Up	191
LymEndo	Cxxc1	2.68755	1.90208	1.32964	1.43053	0.152566	0.999827	Up	192
LymEndo	Efemp2	3.80333	1.52885	1.06883	1.43039	0.152604	0.999827	Up	193
LymEndo	Tmem141	1.32197	2.65807	1.85991	1.42914	0.152964	0.999827	Up	194
LymEndo	Prpf31	2.59605	1.87288	1.31132	1.42823	0.153224	0.999827	Up	195
LymEndo	Atp13a2	2.59605	1.87288	1.31132	1.42823	0.153224	0.999827	Up	196
LymEndo	Mgp	28.8223	0.570442	0.399922	1.42638	0.153757	0.999827	Up	197
LymEndo	Pear1	10.2124	0.939477	0.660428	1.42253	0.154873	0.999827	Up	198
LymEndo	Ube2m	2.68726	1.79075	1.25998	1.42125	0.155244	0.999827	Up	199
[truncated: 5,601 more rows]

## Sheet: e_GoCategory
cellType	Category	Term	PValue	Benjamini	Genes	Count	Group
Endo	angiogenesis related	GO:0045766~positive regulation of angiogenesis	0.00137535	0.143835	VEGFC, FLT1, ADM, LRG1, SERPINE1, AQP1, ANXA3	7	Up
Mphage-DC	angiogenesis related	GO:0045766~positive regulation of angiogenesis	0.000216913	0.0473287	CCL24, CYBB, PTGIS, LRG1, HIPK2, ITGB2, THBS1, ECM1	8	Up
MyoFB	angiogenesis related	GO:0001525~angiogenesis	3.00536e-05	0.00903526	COL18A1, COL4A2, COL4A1, CTGF, PGF, TNFRSF12A, SERPINE1, CCDC80, MFGE8, ECM1, FLNA, FN1	12	Up
MyoFB	angiogenesis related	GO:0045766~positive regulation of angiogenesis	0.000216913	0.0216015	PTGIS, PGF, SERPINE1, RRAS, HSPB1, THBS1, ECM1, DDAH1	8	Up
MyoFB	angiogenesis related	GO:0001568~blood vessel development	0.000725769	0.0533401	LAMA4, COL3A1, COL1A2, COL1A1, TGFB2, CITED2	6	Up
Mphage-DC	apoptotic process related	GO:0043066~negative regulation of apoptotic process	0.00171424	0.1422	YBX3, PRDX5, PDCD4, FLNA, TGFB2, DAPK1, CD38, EDNRB, GPX1, SERPINB2, ALDH2, GRK5, NAIP1, THBS1, FN1	15	Up
Endo	cell adhesion	GO:0098609~cell-cell adhesion	0.000646217	0.092672	TNKS1BP1, ALDOA, LDHA, PPME1, EIF4H, PFKP, NDRG1, TAGLN2, GPRC5A	9	Up
FB	cell adhesion	GO:0007155~cell adhesion	1.22289e-05	0.0153506	F11R, ATP1B1, CADM1, ADAM23, IGFBP7, POSTN, BCAM, MCAM, ITGA9, CTGF, FBLN5, MSLN, COL6A2, THBS1, MFAP4, LRFN3, FN1	17	Up
MyoFB	cell adhesion	GO:0007155~cell adhesion	9.16678e-08	0.000110729	COL18A1, TLN2, TNFRSF12A, IGFBP7, COL15A1, FBLIM1, ITGB5, MFGE8, POSTN, VCAM1, LAMA4, WISP2, CD44, CTGF, ITGA5, FBLN5, COL6A1, LAMC1, THBS1, MFAP4, FN1	21	Up
MyoFB	cell adhesion	GO:0098609~cell-cell adhesion	0.000646217	0.050727	EFHD2, CNN3, PDLIM5, PPFIBP1, PDLIM1, HSPA1A, LRRFIP1, TAGLN2, EPN2	9	Up
MyoFB	cell adhesion	GO:0010811~positive regulation of cell-substrate adhesion	0.00080771	0.0558008	PPM1F, ITGA5, SMOC1, CCDC80, THBS1	5	Up
Pcyte	cell adhesion	GO:0007160~cell-matrix adhesion	0.000105449	0.108491	MKLN1, CTGF, FERMT2, ITGA1, VTN, NID1, ITGB1	7	Up
DC	cell cycle	GO:0007049~cell cycle	0.000244472	0.139083	CLSPN, MKI67, PRC1, GMNN, CDC20, BIRC5, MYBL2, CDK4, UBE2C, ESCO2, TRIM21, AVPI1, SGOL2A, DUSP1, PARD6G, CCNA2, CDCA3	17	Up
LymEndo	cell cycle	GO:0007049~cell cycle	6.11694e-15	6.40543e-12	MAD1L1, MPLKIP, PRC1, FOXM1, INO80, TTC28, AURKB, SPC24, CDCA8, HJURP, CDKN2C, CDKN2D, FBXO5, H2AFX, CCNA2, CDK1, CGRRF1, MKI67, SMC5, TPX2, NUSAP1, BIRC5, GAS1, UBE2C, KNSTRN, ESCO2, NCAPD2, RASSF4, FAM64A, CCNB2, CKS2, MIS18BP1, SMC1A	33	Up
LymEndo	cell division	GO:0007067~mitotic nuclear division	3.51969e-13	1.84593e-10	CDK1, MAD1L1, MPLKIP, SMC5, TPX2, NUSAP1, INO80, BIRC5, TTC28, AURKB, KNSTRN, RPS6, UBE2C, NCAPD2, SPC24, FAM64A, CDCA8, CCNB2, FBXO5, MIS18BP1, SMC1A, CCNA2	22	Up
LymEndo	cell division	GO:0051301~cell division	1.48435e-11	5.19026e-09	CDK1, MAD1L1, MPLKIP, PRC1, SMC5, TPX2, NUSAP1, INO80, BIRC5, TTC28, AURKB, KNSTRN, UBE2C, NCAPD2, SPC24, FAM64A, CDCA8, CCNB2, CKS2, FBXO5, MIS18BP1, SMC1A, CCNA2	23	Up
LymEndo	cell division	GO:0000070~mitotic sister chromatid segregation	6.64666e-05	0.0138484	CDCA8, CENPA, INO80, NUSAP1, KNSTRN	5	Up
Mphage-DC	cell migration	GO:0030335~positive regulation of cell migration	0.000211251	0.0550881	CCL24, ADAM10, ITGA6, CCR1, SSH2, THBS1, INSR, MYLK, TGFB2, FN1	10	Up
MyoFB	cell migration	GO:0030335~positive regulation of cell migration	0.000211251	0.0229346	COL18A1, IRS2, ACTN4, ITGA5, EDN1, COL1A1, THBS1, MYADM, TGFB2, FN1	10	Up
DC	chemotaxis	GO:0030593~neutrophil chemotaxis	0.000491792	0.113539	CCL3, CXCL2, CCL9, CCL4, ITGAM, CCL17	6	Up
DC	chemotaxis	GO:0006935~chemotaxis	0.000901254	0.145971	HMGB2, CCL3, CMKLR1, CXCL2, CCL9, CCL4, CCL17	7	Up
AT2	circadian rhythm	GO:0007623~circadian rhythm	8.34447e-05	0.035488	NR1D1, DBP, GSK3B, UBC, PER2, PER3, UBB, BHLHE40	8	Up
Endo	circadian rhythm	GO:0007623~circadian rhythm	1.29614e-05	0.00873654	NR1D1, DBP, NTRK2, UBC, PER2, PER3, FAS, BHLHE40, BHLHE41	9	Up
MyoFB	circadian rhythm	GO:0048511~rhythmic process	6.44408e-07	0.000259448	KLF9, NR1D2, USP2, DBP, CIART, TEF, PER1, PER3, BHLHE41, DDX5, NRIP1	11	Up
MyoFB	circadian rhythm	GO:0032922~circadian regulation of gene expression	3.2565e-05	0.00783697	USP2, CIART, PER2, PER1, PER3, BHLHE41, NRIP1	7	Up
MyoFB	circadian rhythm	GO:0007623~circadian rhythm	0.000106801	0.0159984	KLF9, DBP, UBC, PER2, PER1, PER3, BHLHE41, DDX5	8	Up
MyoFB	ECM / fibril organization	GO:0030198~extracellular matrix organization	2.18112e-07	0.000131731	COL18A1, COL4A2, LAMA4, COL4A1, FBLN5, SMOC1, CCDC80, POSTN, LAMC1, TGFB2, FN1	11	Up
MyoFB	ECM / fibril organization	GO:0030199~collagen fibril organization	4.15464e-05	0.00832996	COL3A1, COL1A2, COL1A1, ADAMTS2, COL5A2, TGFB2	6	Up
MyoFB	ECM / fibril organization	GO:0051496~positive regulation of stress fiber assembly	0.000964494	0.059507	NOX4, PPM1F, PRKCQ, CTGF, SDC4	5	Up
MyoFB	endodermal cell differentiation	GO:0035987~endodermal cell differentiation	0.000142351	0.0170502	COL4A2, ITGA5, ITGB5, COL6A1, FN1	5	Up
Endo	gluconeogenesis	GO:0006094~gluconeogenesis	0.000122213	0.0405276	TPI1, PER2, PGAM1, GPI1, GAPDH	5	Up
Mphage-DC	glutathione metabolic process	GO:0006749~glutathione metabolic process	9.05796e-06	0.0120733	GPX1, GSR, GPX4, GPX3, IDH1, GSTO1, MGST1	7	Up
Endo	glycolytic process	GO:0006096~glycolytic process	5.85718e-08	7.93031e-05	PKM, ALDOA, TPI1, PFKL, PFKP, PGAM1, GPI1, GAPDH	8	Up
Baso	immune response related	GO:0002376~immune system process	7.87908e-05	0.0474155	CFP, C1QA, C1QB, ADGRE1, CLEC4E, SQSTM1, FCNA, PYCARD, CFH, SLPI, TRIM25, CD5L, C1QC, CSF1R	14	Up
Mphage-DC	immune response related	GO:0002376~immune system process	0.000492843	0.0901158	ADGRE1, IFITM2, FCNA, MSRB1, CD5L, PADI4, GBP2B, CFP, CLEC4E, PYCARD, CD300LG, SLPI, LBP	13	Up
Baso	inflammatory response	GO:0006954~inflammatory response	0.00011541	0.0349517	CCL24, SLC11A1, LIPA, AIMP1, PTGS1, CXCL2, PYCARD, MAPK8, CD5L, PF4, THBS1, ECM1, CSF1R	13	Up
Mphage-DC	inflammatory response	GO:0006954~inflammatory response	4.47308e-05	0.0295473	SELP, C4B, CCR1, PTGS1, PF4, CD5L, ECM1, CCL6, CCL24, CYBB, CXCL13, CHIL3, PYCARD, THBS1	14	Up
AT2	lipid metabolic process	GO:0006629~lipid metabolic process	2.22876e-06	0.00289098	TM7SF2, SCD1, NCEH1, SPTLC1, GDE1, ACER2, PMVK, PTEN, GDPD1, GPX1, SLC16A1, NPC2, CERS2, PRDX6, SULT1A1, SULT1D1, FABP5, SFTPB	18	Up
Mphage-DC	lipid metabolic process	GO:0006631~fatty acid metabolic process	0.000996476	0.125142	CRYL1, ALOX15, PTGIS, PTGS1, ACACA, ADIPOR2, FABP4, SLC27A4	8	Up
MyoFB	organ system development	GO:0001501~skeletal system development	0.000100718	0.0172318	CDKN1C, COL3A1, FST, EDN1, COL1A2, COL1A1, COL5A2, TGFB2	8	Up
MyoFB	organ system development	GO:0001503~ossification	0.00278847	0.12622	PDLIM7, CTGF, MGP, SPARC, ECM1, COL5A2	6	Up
Mphage-DC	oxidation-reduction process	GO:0055114~oxidation-reduction process	4.98459e-05	0.0220353	STEAP3, PTGS1, MSRB1, PRDX5, NDUFA1, GPX1, GSR, CRYL1, CYBB, ALOX15, CBR2, PTGIS, GPX4, GPX3, ALDH2, TXNRD2, IDH1, JMJD1C, GSTO1, MGST1	20	Up
Endo	protein catabolic process	GO:0045732~positive regulation of protein catabolic process	0.000332624	0.0723257	IER3, CDKN1B, PLK2, TIPARP, TRIB3, SOX17	6	Up
Mphage-DC	protein catabolic process	GO:0010466~negative regulation of peptidase activity	0.00115653	0.131574	SERPINB10, SERPINB2, SERPINB1A, SLPI, NAIP1, TIMP2, ECM1	7	Up
MyoFB	protein stabilization	GO:0050821~protein stabilization	0.00183273	0.100146	CCT5, TCP1, USP2, PER3, CCT3, GAPDH, FLNA	7	Up
Endo	regulation of cell cycle	GO:0051726~regulation of cell cycle	0.000134192	0.0356892	CDKN1A, SRSF5, PHACTR4, BCL2, PER2, MECOM, GADD45B, CABLES1	8	Up
LymEndo	regulation of cell cycle	GO:0007346~regulation of mitotic cell cycle	0.000445793	0.0567913	CKS2, FBXO5, BIRC5, TTC28, DAPK3	5	Up
MyoFB	regulation of cell growth	GO:0001558~regulation of cell growth	0.0002836	0.0260125	WISP2, FAM107A, CD44, CTGF, FBLN5, IGFBP7	6	Up
MyoFB	response to amino acid / peptide hormone	GO:0071230~cellular response to amino acid stimulus	0.0025801	0.126883	COL4A1, COL3A1, COL1A2, COL6A1, COL1A1, COL5A2, SESN3	7	Up
Baso	response to glucocorticoid / cAMP	GO:0071407~cellular response to organic cyclic compound	0.000740883	0.141276	HSP90AB1, MSR1, CEBPB, ITGA6, NFKBIA, AXIN2	6	Up
DC	response to glucocorticoid / cAMP	GO:0051384~response to glucocorticoid	0.000721654	0.137043	SDC1, DUSP1, SULT1A1, CXCL2, IGFBP2, ADAM9	6	Up
AT2	response to hypoxia	GO:0001666~response to hypoxia	1.72287e-05	0.0111277	ALDOA, ATP1B1, ACVRL1, ACTN4, EPAS1, EDN1, BNIP3, POSTN, AGER, LTA, ALDH3A1	11	Up
Endo	response to hypoxia	GO:0001666~response to hypoxia	2.4249e-05	0.0108849	ALDOA, PLAT, VEGFC, FLT1, CDKN1B, ADM, PLOD2, EDN1, BNIP3, CD24A, DDIT4	11	Up
Endo	response to hypoxia	GO:0071456~cellular response to hypoxia	0.000593125	0.108421	EIF4EBP1, BCL2, EDN1, BNIP3, NDRG1, AQP1, HIGD1A	7	Up
Erythro	response to hypoxia	GO:0001666~response to hypoxia	7.87842e-05	0.0947176	ALDOA, VCAM1, CAV1, ACVRL1, UCP2, EDN1, BNIP3, POSTN, APAF1, AGER	10	Up
MyoFB	response to hypoxia	GO:0001666~response to hypoxia	0.000139344	0.0185306	NOX4, VCAM1, PTGIS, ACTN4, PGF, EDN1, PDLIM1, POSTN, TGFB2, CITED2	10	Up
DC	response to interferon	GO:0071346~cellular response to interferon-gamma	0.000459631	0.131332	CCL3, EDN1, CCL9, GAPDH, CCL4, CCL17	6	Up
Baso	response to oxidative / ER stress	GO:0006979~response to oxidative stress	0.000283894	0.0676232	GPX2, APOE, HMOX1, PTGS1, TXNRD1, PRDX1, GCLM, SLC7A11	8	Up
Baso	response to oxidative / ER stress	GO:0034976~response to endoplasmic reticulum stress	0.000787033	0.129498	ALOX15, CEBPB, SDF2L1, EEF2, PTPN1, THBS1	6	Up
Erythro	response to TGFbeta	GO:0071560~cellular response to transforming growth factor beta stimulus	0.000254904	0.148702	CAV1, ACVRL1, EDN1, POSTN, PDE3A, APAF1	6	Up
MyoFB	response to TGFbeta	GO:0071560~cellular response to transforming growth factor beta stimulus	3.2565e-05	0.00783697	NOX4, COL4A2, EDN1, SERPINE1, POSTN, COL1A1, ANKRD1	7	Up
Baso	response to TNF / interleukin	GO:0071347~cellular response to interleukin-1	0.00011397	0.0457641	CCL24, CEBPB, PTGIS, CXCL2, SAA3, PYCARD, FN1	7	Up
DC	response to TNF / interleukin	GO:0071347~cellular response to interleukin-1	0.00011038	0.126479	CCL3, HIF1A, CXCL2, EDN1, CCL9, CCL4, CCL17	7	Up
LymEndo	response to TNF / interleukin	GO:0071353~cellular response to interleukin-4	0.00012779	0.0220955	RPLP0, RPL3, RPS2, TUBA1B, IMPDH2	5	Up
Mphage-DC	response to TNF / interleukin	GO:0071347~cellular response to interleukin-1	0.000150642	0.0492524	CCL24, PTGIS, SAA3, PYCARD, KLF2, CCL6, FN1	7	Up
Mphage-DC	response to TNF / interleukin	GO:0071356~cellular response to tumor necrosis factor	0.000838837	0.131223	CCL24, YBX3, PYCARD, FABP4, KLF2, THBS1, CCL6	7	Up
MyoFB	response to TNF / interleukin	GO:0071356~cellular response to tumor necrosis factor	0.000838837	0.0547624	VCAM1, EDN1, FABP4, POSTN, COL1A1, ANKRD1, THBS1	7	Up
Baso	translation related	GO:0006412~translation	6.98372e-06	0.00857399	EEF1A1, MRPL52, RPL36A, AIMP1, EEF2, RPS2, RPS8, RPL23, RPS17, UCP2, EIF4H, RPL8, RPS12, RPL10, RPL12, RPS20	16	Up
Bcells	translation related	GO:0006412~translation	5.61693e-07	0.000662017	EEF1A1, MRPL52, RPSA, EEF1B2, RBM3, EEF2, RPS2, VARS, RPL30, RPL23, EIF4H, RPS12, RPL10A, RPL7A, RPL12, RPS20, RPS21	17	Up
Bcells	translation related	GO:0006414~translational elongation	5.78963e-05	0.033555	GM10073, EEF1A1, EEF1B2, RPLP1, RPLP2, EEF2	6	Up
Bcells	translation related	GO:0002181~cytoplasmic translation	0.000222636	0.0837865	GM10073, EIF4H, RPLP0, RPLP1, RPLP2	5	Up
LymEndo	translation related	GO:0006412~translation	4.09229e-07	0.000107315	EEF1A1, RPSA, RPL9-PS6, RPS9, EEF2, RPL22L1, RPS6, RPS2, RPL28, RPL29, RPS26, RPL32, RPL13A, MRPL19, RPL3, RPS12, RPL10A, RPS20	18	Up
LymEndo	translation related	GO:0002181~cytoplasmic translation	0.000320224	0.046862	RPLP0, RPLP1, RPLP2, RPL22L1, RPL29	5	Up
Mphage	translation related	GO:0006412~translation	3.71003e-05	0.0403456	RBM3, RPL15, RPS7, RPL29, EIF3C, MRPL13, RPL30, GM9493, RPS17, RPL31, RPL10, MRPL47, RPL5, RPL10A, EIF4E2	15	Up
Endo	vasculogenesis	GO:0001570~vasculogenesis	0.000595261	0.0958662	HHEX, ADM, NTRK2, TIPARP, ACKR3, SOX17	6	Up
MyoFB	wound healing	GO:0042060~wound healing	0.000363702	0.0309005	COL3A1, SERPINE1, COL1A1, SPARC, SDC4, TGFB2, FN1	7	Up
Erythro	antigen processing and presentation	GO:0019882~antigen processing and presentation	0.000116939	0.100533	RAB32, H2-OA, H2-EB1, H2-AB1, CD74, AP3B1	6	Down
Mono	antigen processing and presentation	GO:0019882~antigen processing and presentation	9.80822e-06	0.0021506	H2-K1, RELB, H2-DMA, IGHM, CD74, PSMB8, PSMB9	7	Down
Mphage-DC	antigen processing and presentation	GO:0019886~antigen processing and presentation of exogenous peptide antigen via MHC class II	2.78859e-11	3.54709e-08	H2-EB1, H2-DMB1, FCER1G, H2-AA, H2-AB1, H2-DMA, CD74, H2-DMB2	8	Down
Mphage-DC	antigen processing and presentation	GO:0019882~antigen processing and presentation	5.80914e-08	3.69454e-05	H2-EB1, H2-DMB1, H2-AA, H2-AB1, CTSS, H2-DMA, CD74, H2-DMB2, PSMB8	9	Down
Mphage-DC	antigen processing and presentation	GO:0002504~antigen processing and presentation of peptide or polysaccharide antigen via MHC class II	1.15101e-06	0.000292774	H2-EB1, H2-DMB1, H2-AA, H2-AB1, H2-DMA	5	Down
NK	antigen processing and presentation	GO:0019886~antigen processing and presentation of exogenous peptide antigen via MHC class II	1.082e-07	0.000104949	H2-OA, H2-EB1, H2-AA, H2-AB1, CD74, H2-DMB2	6	Down
NK	antigen processing and presentation	GO:0019882~antigen processing and presentation	9.15154e-06	0.00442868	RAB32, H2-OA, H2-EB1, H2-AA, H2-AB1, CD74, H2-DMB2	7	Down
NK-T	antigen processing and presentation	GO:0019886~antigen processing and presentation of exogenous peptide antigen via MHC class II	6.08332e-06	0.00582903	H2-EB1, H2-AA, H2-AB1, CD74, H2-DMB2	5	Down
NK-T	antigen processing and presentation	GO:0019882~antigen processing and presentation	0.000127531	0.0400317	H2-EB1, H2-AA, H2-AB1, IGHM, CD74, H2-DMB2	6	Down
Mphage-DC	apoptotic process related	GO:0043065~positive regulation of apoptotic process	0.00054668	0.0743742	BCL2A1D, PRMT2, BCL2A1B, GZMA, BCL2A1A, MMP9, RASSF2, IL1B, SOX4, HSPD1, CASP2, PHLDA1	12	Down
Mphage-DC	apoptotic process related	GO:0097192~extrinsic apoptotic signaling pathway in absence of ligand	0.000791184	0.0874623	BCL2A1D, BCL2A1B, BCL2A1A, IL1B, CASP2	5	Down
Mphage-DC	apoptotic process related	GO:0043066~negative regulation of apoptotic process	0.00162706	0.137526	LGALS3, TGFBR1, MMP9, SNCA, CBL, AXL, HMGN5, POR, CD74, NAA35, YWHAH, BCL2A1B, BCL2A1A, HSPD1, CASP2	15	Down
DC	B / T cell differentiation	GO:0030217~T cell differentiation	1.63498e-06	0.000688089	CD3D, LCK, BCL11A, CD4, RUNX2, LFNG, GIMAP1	7	Down
Endo	B / T cell differentiation	GO:0030217~T cell differentiation	0.000452494	0.0486743	DLL4, SOX4, KIT, GIMAP1, RHOH	5	Down
Mono	B / T cell differentiation	GO:0030183~B cell differentiation	0.00089638	0.0635083	CEBPG, BCL11A, CD79B, CD79A, IGKC, GIMAP1	6	Down
Endo	cell migration	GO:0030335~positive regulation of cell migration	1.27313e-05	0.00420205	CORO1A, NOTCH1, SEMA3G, ETS1, CXCR4, XBP1, CSF1, FOXF1, HBEGF, KIT, CX3CL1	11	Down
Endo	cell migration	GO:0016477~cell migration	0.00152074	0.125612	HES1, PTPRK, PPP1R9B, CORO1A, CXCR4, EFNB2, RASGEF1A, HBEGF	8	Down
Mphage	cell migration	GO:0030335~positive regulation of cell migration	0.000496383	0.0961021	MAPK1, IRS2, PTK2B, CXCR4, TGFBR1, ZFP703, CD274, CPNE3, CCL5	9	Down
Baso	chemotaxis	GO:0030595~leukocyte chemotaxis	4.20067e-05	0.0228393	CORO1A, CCL3, S100A9, CNR2, CCL4	5	Down
Baso	chemotaxis	GO:0006935~chemotaxis	0.000100728	0.0219176	HMGB2, CCL3, S100A8, RAC2, S100A9, CCR2, FPR2, CCL4	8	Down
Baso	chemotaxis	GO:0030593~neutrophil chemotaxis	0.00040629	0.0618623	CCL3, S100A8, S100A9, FCER1G, TREM3, CCL4	6	Down
Erythro	chemotaxis	GO:0030593~neutrophil chemotaxis	0.000373308	0.0810927	CCL22, S100A8, S100A9, ITGB2, CCL5, FCGR3	6	Down
MyoFB	circadian rhythm	GO:0007623~circadian rhythm	5.52734e-05	0.061121	NPAS2, MAT2A, ID2, ID1, JUN, ARNTL, ID3, CLOCK	8	Down
MyoFB	circadian rhythm	GO:0032922~circadian regulation of gene expression	0.000221588	0.0808322	NPAS2, ID2, PRMT5, ARNTL, PPP1CC, CLOCK	6	Down
MyoFB	circadian rhythm	GO:0048511~rhythmic process	0.00107348	0.142031	NPAS2, ID2, ID1, PRMT5, ARNTL, ID3, CLOCK	7	Down
Baso	immune response related	GO:0002376~immune system process	4.26679e-07	0.000469237	IL1F9, H2-Q10, HMGB2, S100A8, C3, HCK, S100A9, FCNB, ANXA1, PGLYRP1, MSRB1, HP, PSMB8, LCN2, LTF, CD79B, CLEC4A2	17	Down
Baso	immune response related	GO:0045087~innate immune response	7.4975e-05	0.0204078	IL1F9, HMGB2, S100A8, C3, CAMP, HCK, S100A9, FCNB, PGLYRP1, ANXA1, MSRB1, LCN2, FCER1G, CLEC4A2	14	Down
DC	immune response related	GO:0002376~immune system process	2.4281e-10	2.04446e-07	ITK, IRGM1, LST1, CD8B1, BST2, HCK, SAMHD1, RSAD2, CD300C, SP110, FCGR1, CD55, CD300A, ETS1, OASL2, IRF7, NRROS, CD4, CD79B, CD79A, CD7	21	Down
DC	immune response related	GO:0045087~innate immune response	3.24013e-06	0.000908985	ITK, IRGM1, BST2, HCK, SAMHD1, RSAD2, SP110, FCGR1, CYLD, CD55, OASL2, IRF7, LCK, NRROS, OAS1A, TYROBP	16	Down
DC	immune response related	GO:0006955~immune response	0.000786774	0.0903314	CCR9, LST1, PPBP, TNFRSF25, OASL2, NRROS, CD4, LTB, TNFRSF4, CD27	10	Down
Erythro	immune response related	GO:0002376~immune system process	0.000168201	0.0733707	ITK, S100A8, CD8A, CSF1, S100A9, TNFRSF13C, SAMHD1, H2-AB1, CD74, H2-EB1, NRROS, CD79B, CD300LD	13	Down
Erythro	immune response related	GO:0006955~immune response	0.000754802	0.127874	CCL22, H2-OA, H2-EB1, NRROS, H2-AB1, CCL5, NFIL3, LTB, CD74, CTSW	10	Down
Mono	immune response related	GO:0002376~immune system process	5.37875e-11	4.72254e-08	H2-K1, ADGRE1, IRGM1, IFIH1, S100A8, OAS3, H2-Q7, CD74, PSMB8, PSMB9, LAT, LAT2, FCMR, SERPINA3G, IRF7, TAP1, IRF1, LTF, CD79B, CD79A, H2-DMA, SPON2	22	Down
Mono	immune response related	GO:0006955~immune response	8.24235e-06	0.00240936	H2-K1, VPREB3, IL18, CEBPG, OAS3, IL15, CCL5, CD74, LAT, ILF2, RELT, TGTP2, H2-DMA	13	Down
Mono	immune response related	GO:0050853~B cell receptor signaling pathway	1.09262e-05	0.00191681	LAT2, CD79B, CD79A, IGLC2, IGKC, IGHM, IGLC3	7	Down
Mono	immune response related	GO:0045087~innate immune response	8.48651e-05	0.0123423	IFIH1, IRGM1, S100A8, CAMP, RELB, OAS3, IGHM, IRF7, IRF1, OAS1A, SPON2, IGLC2, IGKC, IGLC3	14	Down
Mono	immune response related	GO:0006952~defense response	9.75751e-05	0.0121647	IRGM1, NGP, CAMP, TAP1, IFI47, TGTP2, PTPRCAP, CD74	8	Down
Mono	immune response related	GO:0002250~adaptive immune response	0.000299616	0.0259671	LAT, LAT2, ADGRE1, SERPINA3G, TAP1, CD79B, CD79A, CD74	8	Down
Mphage	immune response related	GO:0050853~B cell receptor signaling pathway	0.00013148	0.0393422	MEF2C, MAPK1, CD79A, IGLC2, IGKC, IGLC3	6	Down
Mphage-DC	immune response related	GO:0002376~immune system process	2.96326e-07	0.000125634	CADM1, LGALS3, LY86, TLR1, AXL, H2-DMB1, H2-AB1, FCGR1, PSMB8, CD74, SQSTM1, IRF7, TAP1, H2-EB1, H2-AA, IIGP1, PTMS, H2-DMA	18	Down
Mphage-DC	immune response related	GO:0006955~immune response	5.99934e-07	0.000190761	TLR1, H2-DMB1, H2-AB1, CTSS, H2-DMB2, CD74, FTH1, TNFRSF1B, IRF8, H2-EB1, IL1B, H2-AA, TGTP2, H2-DMA, LTB	15	Down
NK	immune response related	GO:0050853~B cell receptor signaling pathway	0.000139265	0.03321	PTPRC, CD19, CD79A, IGLC2, IGKC, IGLC3	6	Down
NK	immune response related	GO:0002376~immune system process	0.000199929	0.0380473	TNFAIP8L2, GPR183, LST1, S100A8, FCMR, H2-EB1, CNPY3, CD300LF, SAMHD1, H2-AA, H2-AB1, CD79A, CD74	13	Down
NK-T	immune response related	GO:0050853~B cell receptor signaling pathway	0.000139265	0.032907	CD79B, CD79A, IGLC2, IGKC, IGHM, IGLC3	6	Down
Tcells	immune response related	GO:0045087~innate immune response	1.85658e-07	8.44706e-05	CD244, S100A8, TLR13, S100A9, KLRK1, PGLYRP1, POLR3A, CYBB, CD55, IFIT1, CLEC4E, FCER1G, IGKC, IGLC2, CLEC5A, ZBTB1, TYROBP, IGLC3	18	Down
Tcells	immune response related	GO:0002376~immune system process	1.32186e-05	0.00300274	CD244, LST1, S100A8, TLR13, S100A9, PGLYRP1, KLRK1, CD55, IFIT1, CLEC4E, LTF, CD79A, CLEC5A, ZBTB1, CD7	15	Down
Baso	inflammatory response	GO:0006954~inflammatory response	7.31568e-05	0.0264685	IL1F9, ITGB2L, HMGB2, CCL3, S100A8, C3, HCK, S100A9, CCR2, CNR2, ANXA1, FPR2, CCL4	13	Down
Baso	inflammatory response	GO:0050729~positive regulation of inflammatory response	0.000265447	0.0475063	CCL3, S100A8, S100A9, CCR2, GPSM3, CCL4	6	Down
DC	intracellular signal transduction related	GO:0007166~cell surface receptor signaling pathway	0.000814698	0.0822056	CD3G, CD3D, ADGRE4, LCK, CD79B, CD4, CD79A, FCGR1, LAG3	9	Down
Endo	intracellular signal transduction related	GO:0035556~intracellular signal transduction	0.000223236	0.0322867	GPR182, SGK1, SOCS2, NUAK2, KIT, ARHGEF12, WSB1, SH3BP5, MAP4K4, DUSP1, RPS6KA2, TEK, PLCB1	13	Down
Mphage	intracellular signal transduction related	GO:0000165~MAPK cascade	0.000384068	0.0895419	ZFP36, MEF2C, MAPK1, PTK2B, IL1B, CCL5	6	Down
MyoFB	Notch signaling pathway	GO:0007219~Notch signaling pathway	0.00013912	0.0763051	NOTCH2, PTP4A3, HEYL, GRIP2, TIMP4, NEURL1B, PSENEN, NRIP2	8	Down
Endo	organ system development	GO:0007507~heart development	2.01851e-05	0.00532679	ZFP36L1, VCAM1, APLNR, NOTCH1, RPS6KA2, FOXF1, TEK, SOX4, HEG1, SOX18, ID3, PCSK5	12	Down
Endo	organ system development	GO:0007399~nervous system development	0.000129072	0.0211205	SCN3B, SOX11, EFNB2, ZEB1, PRDM8, SEMA6A, PPP1R9B, SEMA6D, CXCR4, NEDD4, DLL4, STMN1, SMARCA2	13	Down
Mphage-DC	organ system development	GO:0001501~skeletal system development	9.72913e-05	0.015351	CHD7, LGALS3, MMP9, TGFBR1, HEXB, RASSF2, SOX4, RUNX1	8	Down
NK	oxidation-reduction process	GO:0072593~reactive oxygen species metabolic process	0.000378617	0.0593849	NNT, MET, NDUFA13, NDUFS3, NDUFS1	5	Down
Tcells	phagocytosis	GO:0006911~phagocytosis, engulfment	0.000778504	0.132156	AIF1, FCER1G, IGLC2, IGKC, IGLC3	5	Down
Mono	protein catabolic process	GO:0051603~proteolysis involved in cellular protein catabolic process	0.00185321	0.102889	GZMA, CTSC, HSPA5, PSMB8, PSMB9	5	Down
Mphage-DC	protein stabilization	GO:0051085~chaperone mediated protein folding requiring cofactor	6.33076e-06	0.00114973	H2-DMB1, HSPD1, H2-DMA, CD74, H2-DMB2	5	Down
Endo	regulation of B / T cell proliferation	GO:0042102~positive regulation of T cell proliferation	0.00242802	0.148545	HES1, VCAM1, CORO1A, CCR7, IL6ST	5	Down
NK-T	regulation of B / T cell proliferation	GO:0050871~positive regulation of B cell activation	0.000217418	0.0409311	IGLC2, IGKC, IGHM, TNIP2, IGLC3	5	Down
DC	regulation of cell proliferation	GO:0042127~regulation of cell proliferation	0.00103039	0.0919434	SAT1, ITK, TCF7, PPBP, TNFRSF25, HCK, LCK, JUNB, CD27	9	Down
Endo	regulation of cell proliferation	GO:0008284~positive regulation of cell proliferation	5.96006e-06	0.00785418	IL6ST, MARCKSL1, CSF1, SOX11, EFNB2, SOX4, KIT, STAT1, WWTR1, PLAC8, HES1, CCND1, NOTCH1, XBP1, ETS1, HLX, HBEGF, PBX1	18	Down
Endo	regulation of cell proliferation	GO:0008285~negative regulation of cell proliferation	0.00215153	0.146413	PTPRK, NOTCH1, CD37, RPS6KA2, IFITM3, DLL4, SOX4, ZEB1, SKAP2, SMARCA2, SLFN2	11	Down
MyoFB	regulation of cell proliferation	GO:0008285~negative regulation of cell proliferation	0.00073909	0.131165	ING5, IFIT3, NOTCH2, ADM, BTG2, IFITM3, JUN, SMAD6, IGFBP3, FTH1, SLFN2, APC	12	Down
Endo	regulation of transcription	GO:0000122~negative regulation of transcription from RNA polymerase II promoter	6.43507e-06	0.00424777	SOX11, RELB, ZEB1, STAT1, WWTR1, JUNB, HES1, NOTCH1, CCND1, XBP1, NEDD4, NRARP, DLL4, FOXF1, NR2F6, BCL6B, SOX18, ID3, SKIL, GBP4, NFIA	21	Down
Endo	regulation of transcription	GO:0045944~positive regulation of transcription from RNA polymerase II promoter	2.02946e-05	0.00446502	MYO6, SOX11, CREM, RELB, SOX4, NR4A1, ZEB1, STAT1, WWTR1, JUNB, PLAC8, HES1, NOTCH1, MEIS2, FLI1, ETS1, XBP1, FOXF1, CSRNP1, PBX1, SOX18, KLF2, SMARCA2, NFIA	24	Down
Endo	regulation of transcription	GO:0006351~transcription, DNA-templated	0.000439404	0.0514872	CREM, SOX4, ZEB1, FLI1, MEIS2, XBP1, HLX, FOXF1, TRP53INP2, NR2F6, SOX18, SP100, SOX11, RELB, NR4A1, WWTR1, STAT1, FOXN3, JUNB, PRDM8, HES1, NOTCH1, CCND1, ETS1, PARP14, CSRNP1, PBX1, VGLL4, ID3, KLF2, SMARCA2, NFIA	32	Down
Endo	regulation of transcription	GO:0045893~positive regulation of transcription, DNA-templated	0.000575663	0.0569176	SOX11, SOX4, NR4A1, STAT1, FOXN3, HES1, NOTCH1, ETS1, FOXF1, TRP53INP2, SOX18, KLF2, PLCB1, SMARCA2, NFIA	15	Down
Mphage	regulation of transcription	GO:0006351~transcription, DNA-templated	2.17655e-05	0.0262259	AKNA, KMT2E, CREBRF, MEF2C, BACH1, FOSL2, POLR2L, PRR13, KMT2C, HR, PAX5, NFYA, TERF2IP, ZBTB18, ZFP316, ARNT, CITED2, DDX17, DYNLL1, JUND, NFIL3, TXNIP, KLF6, RBBP5, PPHLN1, ZFP703, ARID1A, MAPK1, ATXN3, BTG2, ARRB1, TRPS1, SFPQ, ITGB1BP1, HIVEP1, LCOR	36	Down
Mphage	regulation of transcription	GO:0000122~negative regulation of transcription from RNA polymerase II promoter	2.96318e-05	0.0179278	BACH1, ZFP36, MEF2C, TXNIP, CREBRF, IMPACT, PAX5, ARID1A, ZBTB18, CITED2, TSC22D3, BTG2, SFPQ, TRPS1, JUND, IL1B, HIVEP1, LCOR, NFIL3, MEPCE	20	Down
Mphage	regulation of transcription	GO:0006355~regulation of transcription, DNA-templated	4.24345e-05	0.0171229	AKNA, KMT2E, CREBRF, MEF2C, BACH1, FOSL2, PRR13, KMT2C, HR, PAX5, NFYA, TERF2IP, ZBTB18, GM13212, ZFP316, ARNT, CITED2, FOS, TSC22D3, DDX17, DYNLL1, JUND, NFIL3, TXNIP, KLF6, RBBP5, PPHLN1, TGFBR1, ZFP703, ARID1A, 6720489N17RIK, ABCG1, ATXN3, BTG2, ARRB1, TRPS1, SFPQ, ITGB1BP1, HIVEP1, LCOR	40	Down
MyoFB	regulation of transcription	GO:0006351~transcription, DNA-templated	0.000315241	0.0860108	ING5, TAF1C, THRA, PRR13, ZEB2, YBX1, FOXS1, NPAS2, MEIS2, TSC22D4, PRMT5, NR2F2, TCF3, ATF7IP, CEBPB, SMAD6, NR4A1, IRF2BP2, ARNTL, NRIP2, NOTCH2, RASL11A, HOXB7, ID2, BTG2, ID1, PRDM6, JUN, HEYL, ID3, NFIA, CLOCK, ZFP512	33	Down
Mono	response to amino acid / peptide hormone	GO:0043434~response to peptide hormone	0.000557333	0.0435222	GATM, BTG2, SERPINA3G, SERPINA3F, STAT1, EIF2B3	6	Down
Endo	response to cytokine	GO:0034097~response to cytokine	7.17654e-06	0.00315986	CORO1A, IL6ST, SERPINA3G, RELB, SERPINA3F, SKIL, STAT1, JUNB	8	Down
Endo	response to cytokine	GO:0019221~cytokine-mediated signaling pathway	0.00185533	0.134565	SOCS2, IL6ST, IIGP1, KIT, CX3CL1, STAT1, IFNGR2	7	Down
Mphage-DC	response to cytokine	GO:0034097~response to cytokine	0.00128607	0.127516	CORO1A, CXCL16, JUND, ACP5, NFKB2, SKIL	6	Down
Endo	response to glucocorticoid / cAMP	GO:0051591~response to cAMP	0.00104309	0.0939159	DUSP1, CREM, TEK, STAT1, JUNB	5	Down
DC	response to interferon	GO:0035458~cellular response to interferon-beta	0.000485586	0.0658894	IRGM1, IFI47, STAT1, IFI203, IFI204	5	Down
Mono	response to interferon	GO:0035458~cellular response to interferon-beta	8.3704e-08	3.67454e-05	IRGM1, IRF1, IFI47, TGTP2, STAT1, DDX41, GBP2, IFI204	8	Down
Mphage-DC	response to interferon	GO:0034341~response to interferon-gamma	5.13332e-06	0.00108768	CIITA, CXCL16, H2-EB1, SNCA, H2-AA, TGTP2	6	Down
Tcells	response to interferon	GO:0035458~cellular response to interferon-beta	8.72217e-08	7.93686e-05	IFIT1, IRGM2, IGTP, HTRA2, IFI47, TGTP2, STAT1, GBP2	8	Down
Baso	response to TNF / interleukin	GO:0071347~cellular response to interleukin-1	0.000802317	0.104491	LCN2, CCL3, CAMP, RORA, CCL4, TANK	6	Down
Endo	response to VEGF	GO:0035924~cellular response to vascular endothelial growth factor stimulus	3.72185e-05	0.00700973	VCAM1, NOTCH1, XBP1, DLL4, NR4A1	5	Down
Mono	response to virus / bacterium	GO:0051607~defense response to virus	0.000156735	0.0170559	IFIH1, ISG15, IRF1, OAS3, OAS1A, SPON2, DDX41, IFIT1BL1, IFNGR2	9	Down
Mono	response to virus / bacterium	GO:0009615~response to virus	0.00105653	0.0641447	IFIH1, IFI27L2A, OAS3, OAS1A, TGTP2, CCL5	6	Down
Mono	response to virus / bacterium	GO:0042742~defense response to bacterium	0.00194449	0.101302	H2-K1, ISG15, CAMP, SPON2, IGLC2, IGKC, PLAC8, IGLC3	8	Down
Tcells	response to virus / bacterium	GO:0042742~defense response to bacterium	1.15112e-05	0.00348566	IRGM2, CLEC4E, ISG15, IFNG, PGLYRP1, FCER1G, IGLC2, IGKC, PLAC8, TMF1, IGLC3	11	Down
MegK	ribosomal small subunit biogenesis	GO:0042274~ribosomal small subunit biogenesis	7.89227e-07	0.000417809	RPS19, RPS28, GM9493, RPS16, RPS6, RPS7	6	Down
MegK	ribosomal small subunit biogenesis	GO:0000028~ribosomal small subunit assembly	1.35989e-06	0.000479927	RPS27, RPS19, RPS28, MRPS11, RPS27RT, RPS5	6	Down
MegK	ribosomal small subunit biogenesis	GO:0006364~rRNA processing	3.44352e-06	0.000911258	RPL35A, RPS19, RPS28, GM9493, RPS16, RPL26, RPL11, RPS6, NOP10, RPS7	10	Down
DC	sterol biosynthetic process	GO:0016126~sterol biosynthetic process	9.27687e-05	0.0193393	SC5D, MSMO1, HMGCR, FDPS, HMGCS1	5	Down
MegK	translation related	GO:0006412~translation	8.65914e-24	9.17003e-21	RPL17, MRPS14, RPL13, MRPS11, RPL15, EIF5B, RPS3, RPS26, RPS27, RPS28, RPS29, RPL6, FAU, RPL11, RPS27RT, RPS21, MRPL34, RPL35A, AARS, RPL26, RPS9, MRPS6, RPS6, RPS5, RPS8, RPS3A1, RPS7, RPS18, RPS19, RPL41, RPS16, RPL18A, GM9493, RPL21, RPS13, RPL37A	36	Down
MegK	translation related	GO:0002181~cytoplasmic translation	0.000299954	0.0615633	RPL35A, RPL6, RPLP0, RPL15, RPL26	5	Down
Endo	vasculogenesis	GO:0001570~vasculogenesis	0.000329245	0.0426309	ZFP36L1, FOXF1, TEK, HEG1, SOX18, JUNB	6	Down
