# Supplementary material for: Short-term exposure to intermittent hypoxia leads to changes in gene expression seen in chronic pulmonary disease
Source: eLife. 2021 Feb 18;10:e63003. doi: 10.7554/eLife.63003 (PMC7909952; doi:10.7554/eLife.63003)
Supplement: Supplementary file 4. — (a) The pulmonary disease-associated genes from top 200 up- or downregulated genes in each detected lung cell type exposed to IH. (b) The drug table linking drugs mainly indicated to treat pulmonary diseases and top 200 up- or downregulated genes in each cell type exposed to IH. (c) Gene set enrichment analysis of expressed genes in myofibroblasts in mice lung exposed to IH compared to controls. (d) Ranking of predicted transcription factors in myofibroblasts using SINCERA. [file elife-63003-supp4.xlsx]

## Sheet: a_diseaseGenes
CellType	Disease	DiseaseFullName	DisGeNETname	PValue	BH	Intersect	n_ref	n_diffGene	Gene	Group
Mphage-DC	Allergic asthma	Allergic asthma	Allergic asthma|disease	0.00805191	0.02589	6	161	174	CCL24,CCR1,ITGAM,LTC4S,MYLK,TGFB2	Up
NK-T	Allergic asthma	Allergic asthma	Allergic asthma|disease	0.00214462	0.00914744	7	161	179	ALOX5,CAV1,GATA3,IFNGR1,NOS3,PDE4B,TNF	Up
AT1	Asthma	Asthma	Asthma|disease	0.00341501	0.012977	23	1091	185	AGER,ANXA2,ANXA6,BATF,BDNF,CAV1,CD44,CYP4F3,DCTN4,EDN1,F2R,FUCA1,FUCA2,GAPDH,ISYNA1,KHDRBS1,KRT19,RHOA,SMAD7,TIMP3,TSC22D3,VEGFA,VLDLR	Up
AT2	Asthma	Asthma	Asthma|disease	3.12041e-05	0.000509462	27	1091	171	AGER,ANO1,CARD10,CHIA,COL1A1,COL3A1,COL4A3,CYP2B6,EDN1,EDNRB,F3,FOXO3,FSTL1,GAPDH,GAS6,KRT19,LGALS3,LTA,NFIA,PCNA,PDE4B,POSTN,PTEN,SCD,SFTPB,TFF2,TXNIP	Up
Baso	Asthma	Asthma	Asthma|disease	0.000279909	0.00225004	25	1091	174	AHNAK,ALOX15,APOE,CCL24,CSF1R,CTSS,EDNRB,F10,F3,F7,FABP4,FN1,GAPDH,GCLM,HMOX1,LIPA,LTC4S,MAPK8,PDCD4,PTGS1,SLC11A1,SLPI,SQSTM1,THBS1,TPT1	Up
Bcell	Asthma	Asthma	Asthma|disease	0.000145736	0.00138938	25	1091	167	ACE,ADM,AHNAK,ALDH2,ANXA2,BCL2,CD200,CRIP1,CTGF,CXCL12,EDN1,EGF,GAPDH,HSPA12B,IL9R,LAMA5,PDGFB,RPLP0,RPSA,SCD,SOX5,TIMP3,TNFRSF14,TNFRSF8,TPT1	Up
DC	Asthma	Asthma	Asthma|disease	0.00135477	0.00629217	22	1091	162	AHNAK,ALOX5,BIRC5,CCL17,COX4I2,CRIM1,DUSP1,EDN1,EGR1,GAPDH,HIF1A,HSPB1,ITGAM,MIF,MMP12,PCNA,PTGS1,SCGB3A2,SERPING1,TGFBI,TPI1,TUBB4B	Up
Endo	Asthma	Asthma	Asthma|disease	0.0114898	0.0340234	21	1091	182	ACKR3,ADM,ANXA2,BCL2,CD200,CDKN1A,CDKN1B,EDN1,EPHX1,FAS,FLT1,GAPDH,HSPA12B,LRRC32,PDE4B,PDGFB,SERPINE1,SMAD7,TIMP3,TIPARP,TPI1	Up
Erythro	Asthma	Asthma	Asthma|disease	0.00223697	0.00935053	23	1091	179	ACE,ACKR3,AGER,CAV1,CD14,CD200,CPOX,EDN1,EPHX1,FTO,GATA1,GATA3,GRP,MFGE8,PDE4B,POSTN,PUS10,SLC17A5,SLC3A2,TBXAS1,TPI1,VCAM1,XDH	Up
FB	Asthma	Asthma	Asthma|disease	6.81274e-05	0.000837566	26	1091	169	ACE,ADAM33,ADAMTS1,AGER,ANXA1,C3,CCL11,CD200,CTGF,EDN1,EPHX1,FLT1,FN1,JUNB,KRT19,LGALS1,MAPK3,MCAM,MMRN1,PEPD,POSTN,RGS2,SERPINE1,TAGLN,THBS1,TXNIP	Up
Mono	Asthma	Asthma	Asthma|disease	0.000366015	0.00277632	24	1091	167	ACE,BCL2,C5AR1,CCL24,CCR1,CD200,CD44,CEP68,CHIA,CTSD,CYSLTR1,EDN1,FABP4,FKBP5,FPR2,HMOX1,ITGAX,NOS3,PDE4B,PTGER4,SLC11A1,SLC12A2,SOD3,THBD	Up
Mphage	Asthma	Asthma	Asthma|disease	0.0116692	0.0340234	20	1091	171	CD200,CD68,CRLF2,CXCL12,DECR1,DTL,EDN1,FABP4,FCGR2B,HMOX1,ITGB2,LGALS3,PCNA,S100A1,SCD,SLC39A2,SMAD7,SPAG11B,TUBB4B,VPS13D	Up
Mphage-DC	Asthma	Asthma	Asthma|disease	5.69327e-08	5.94947e-06	33	1091	174	AHNAK,ALDH2,ALOX15,ALOX5AP,CCL24,CCR1,CD38,CTSD,CYBB,EDNRB,F7,FABP4,FN1,GAPDH,GPX3,GRK5,HSPA12B,ITGAM,ITGB2,JMJD1C,LTC4S,MYLK,PDCD4,PLEK,PTGS1,RAB27A,SELP,SERPINB2,SLPI,TGFB2,THBS1,TIMD4,TLN1	Up
MyoFB	Asthma	Asthma	Asthma|disease	0.000656736	0.00448268	25	1091	184	ADAMTS1,AKAP13,ANXA1,CD44,COL1A1,COL3A1,CTGF,EDN1,FABP4,FLNC,FN1,GAPDH,HSPB1,MFGE8,NOX4,POSTN,PPP1R12A,PTGS1,SCD,SDC4,SERPINE1,SERPINE2,TGFB2,THBS1,VCAM1	Up
NK-T	Asthma	Asthma	Asthma|disease	2.67144e-05	0.000509462	28	1091	179	ACE,ACKR3,AHNAK,ALOX5,CAV1,CCR8,EDN1,F3,FLT3LG,GATA3,HSPB1,JUNB,KITLG,LNPEP,LRRC32,LTB4R,NOS3,NOTCH4,ODC1,OGG1,PBX2,PDE4B,SDC4,SERPINB6,SLC30A5,SLC3A2,TNF,TXNIP	Up
Pcyte	Asthma	Asthma	Asthma|disease	0.0102026	0.0318259	21	1091	180	AGTR1,CD200,CTGF,EPHX1,F2R,FRMD6,HSPB2,JUN,JUND,LEPR,MFGE8,ODC1,POSTN,PRKG1,RELA,RGS5,SERPINE1,SMAD7,TLN1,TUBB4B,VTN	Up
Tcell	Asthma	Asthma	Asthma|disease	0.00186088	0.008275	22	1091	166	ACE,ANXA2,ATPAF1,AURKB,BIRC5,CD200,CRIM1,EDN1,EGF,EPHX1,FLAD1,FSTL1,GAPDH,HSPA12B,LAMA5,MADD,MFGE8,ODC1,RGS7BP,SLC12A2,TNS1,TRPV4	Up
AT2	COPD	COPD	Chronic Obstructive Airway Disease|disease	2.47438e-05	0.000509462	18	554	171	ADAM19,AGER,AQP5,BNIP3,COL1A1,COL4A3,DBP,EDN1,EDNRB,EPAS1,FABP5,FOXO3,GSTO1,LCN2,NPNT,PTEN,SFTPB,SLC1A5	Up
Baso	COPD	COPD	Chronic Obstructive Airway Disease|disease	3.12809e-05	0.000509462	18	554	174	CD5L,CFH,CTSS,DBP,EDNRB,FN1,GCLM,GSTO1,HMOX1,KRT5,LTC4S,MSR1,PTGS1,PTPN1,S100A4,SLC11A1,SLPI,TIMP2	Up
Bcell	COPD	COPD	Chronic Obstructive Airway Disease|disease	0.0127163	0.0364068	12	554	167	ACE,ADM,ALDH2,BCL2,CTGF,CTSE,DBP,EDN1,HSD11B1,SOX5,VIM,VWF	Up
DC	COPD	COPD	Chronic Obstructive Airway Disease|disease	0.00141292	0.00641956	14	554	162	CD163,DBP,EDN1,EGR1,GSTO1,HIF1A,ITGAM,MIF,MMP12,PTGS1,RRM1,S100A4,SOX6,VIM	Up
Erythro	COPD	COPD	Chronic Obstructive Airway Disease|disease	0.000458925	0.00330743	16	554	179	ACE,AGER,AKAP12,AQP5,BNIP3,CAV1,CD14,CH25H,CPOX,EDN1,EPHX1,FTO,MFAP4,RAPGEF3,SMAD6,XDH	Up
FB	COPD	COPD	Chronic Obstructive Airway Disease|disease	3.51917e-07	2.40428e-05	21	554	169	ACE,ADAM33,AGER,CCL11,CTGF,CXCL13,DBP,EDN1,EPAS1,EPHX1,FBLN5,FN1,MCAM,MFAP4,MMRN1,PDZD2,SERPINE1,SLC1A5,SMPD3,TIMP2,VIM	Up
Mono	COPD	COPD	Chronic Obstructive Airway Disease|disease	0.000209512	0.00175152	16	554	167	ACE,BCL2,BNIP3,C5AR1,DBP,EDN1,GSR,HMOX1,LRP5,MFAP4,NCF1,NOS3,SCLT1,SLC11A1,SOD3,VWF	Up
Mphage	COPD	COPD	Chronic Obstructive Airway Disease|disease	0.000831084	0.0049304	15	554	171	AQP5,CD63,CD68,CXCR1,EDN1,FABP5,GSTO1,HMOX1,ITGB2,MARCO,RNASEH2A,SMAD7,VIM,VWF,XRCC5	Up
Mphage-DC	COPD	COPD	Chronic Obstructive Airway Disease|disease	5.75186e-07	2.40428e-05	21	554	174	ADIPOR2,ALDH2,CD5L,CXCL13,CYBB,DBP,EDNRB,FABP5,FN1,GSR,GSTO1,ITGAM,ITGB2,KLF2,LTC4S,MSR1,PRTN3,PTGS1,SLPI,TGFB2,TIMP2	Up
MyoFB	COPD	COPD	Chronic Obstructive Airway Disease|disease	6.55601e-05	0.000837566	18	554	184	COL1A1,CS,CTGF,CUL9,CYS1,DBP,EDN1,FBLN5,FN1,ITGA5,ITGB5,MFAP4,PTGS1,S100A4,SERPINE1,SERPINE2,TGFB2,VIM	Up
NK-T	COPD	COPD	Chronic Obstructive Airway Disease|disease	0.00132288	0.00628369	15	554	179	ACE,BNIP3,CAV1,CCR8,CD163,DBP,EDN1,LNPEP,NOS3,OGG1,S100A4,SCARB1,SERPINB6,SIRT6,TNF	Up
AT1	ILF	Interstitial lung fibrosis	Interstitial lung fibrosis|phenotype	0.00872971	0.0276441	5	110	185	BMP4,BSG,CD44,EDN1,VEGFA	Up
AT2	ILF	Interstitial lung fibrosis	Interstitial lung fibrosis|phenotype	0.00112133	0.0059685	6	110	171	ADAM19,AQP3,COL1A1,EDN1,SPARC,TM7SF2	Up
Bcell	ILF	Interstitial lung fibrosis	Interstitial lung fibrosis|phenotype	2.09021e-06	6.02584e-05	9	110	167	ACE,ADM,ALDH2,BCL2,BGN,CTGF,EDN1,EGF,VIM	Up
DC	ILF	Interstitial lung fibrosis	Interstitial lung fibrosis|phenotype	0.000847407	0.0049304	6	110	162	AQP3,EDN1,HIF1A,KLF5,SDC1,VIM	Up
FB	ILF	Interstitial lung fibrosis	Interstitial lung fibrosis|phenotype	2.30654e-06	6.02584e-05	9	110	169	ACE,BGN,CTGF,DES,EDN1,FN1,SERPINE1,TIMP2,VIM	Up
Mono	ILF	Interstitial lung fibrosis	Interstitial lung fibrosis|phenotype	0.000146251	0.00138938	7	110	167	ACE,BCL2,BGN,CD44,EDN1,HMOX1,SPARC	Up
Mphage	ILF	Interstitial lung fibrosis	Interstitial lung fibrosis|phenotype	0.00631758	0.0209583	5	110	171	CD68,EDN1,HMOX1,TIMP4,VIM	Up
Mphage-DC	ILF	Interstitial lung fibrosis	Interstitial lung fibrosis|phenotype	0.00678917	0.0221709	5	110	174	ALDH2,BSG,CYBB,FN1,TIMP2	Up
MyoFB	ILF	Interstitial lung fibrosis	Interstitial lung fibrosis|phenotype	5.10791e-07	2.40428e-05	10	110	184	BGN,CD44,COL1A1,CTGF,EDN1,FN1,MYOZ2,SERPINE1,SPARC,VIM	Up
Tcell	ILF	Interstitial lung fibrosis	Interstitial lung fibrosis|phenotype	0.000961887	0.00543336	6	110	166	ACE,BGN,BMP4,EDN1,EGF,VIM	Up
Bcell	IPAH	Idiopathic pulmonary arterial hypertension	Idiopathic pulmonary arterial hypertension|disease	8.99107e-05	0.000989017	8	137	167	ACTA2,BGN,EGF,GPI,PTGIS,RYR1,SOX17,TPT1	Up
Erythro	IPAH	Idiopathic pulmonary arterial hypertension	Idiopathic pulmonary arterial hypertension|disease	0.0183735	0.0462658	5	137	179	ACTA2,AQP1,HDAC4,MGP,SOX17	Up
FB	IPAH	Idiopathic pulmonary arterial hypertension	Idiopathic pulmonary arterial hypertension|disease	9.77026e-05	0.00102099	8	137	169	ACTA2,BGN,GJA1,GPI,KLF6,MGP,PTGIS,THBS1	Up
Mphage-DC	IPAH	Idiopathic pulmonary arterial hypertension	Idiopathic pulmonary arterial hypertension|disease	0.000714621	0.00466737	7	137	174	ACTA2,CCR1,FGFR1,FLNA,ITSN1,PTGIS,THBS1	Up
MyoFB	IPAH	Idiopathic pulmonary arterial hypertension	Idiopathic pulmonary arterial hypertension|disease	0.0048671	0.0172387	6	137	184	BGN,COL1A2,FLNA,MGP,PTGIS,THBS1	Up
Tcell	IPAH	Idiopathic pulmonary arterial hypertension	Idiopathic pulmonary arterial hypertension|disease	0.0136794	0.0371297	5	137	166	AQP1,BGN,EGF,SOX17,SRC	Up
AT2	IPF	Idiopathic Pulmonary Fibrosis	Idiopathic Pulmonary Fibrosis|disease	0.00128173	0.00622982	10	297	171	AGER,COL1A1,COL3A1,FOXO3,GSK3B,LGALS3,PCNA,PTEN,SFTPB,SPARC	Up
Baso	IPF	Idiopathic Pulmonary Fibrosis	Idiopathic Pulmonary Fibrosis|disease	0.00500181	0.0172387	9	297	174	FN1,GATA6,HMOX1,KRT8,LTBP1,MSR1,PF4,PTGS1,S100A4	Up
DC	IPF	Idiopathic Pulmonary Fibrosis	Idiopathic Pulmonary Fibrosis|disease	0.000849255	0.0049304	10	297	162	CCL17,CCNA2,CD163,EGR1,PCNA,PRC1,PTGS1,S100A4,SDC1,VIM	Up
FB	IPF	Idiopathic Pulmonary Fibrosis	Idiopathic Pulmonary Fibrosis|disease	0.00117277	0.00597828	10	297	169	AGER,ANXA1,CTGF,CXCL13,FLT1,FN1,MMRN1,TAGLN,VIM,ZNF253	Up
LymEndo	IPF	Idiopathic Pulmonary Fibrosis	Idiopathic Pulmonary Fibrosis|disease	0.0179726	0.0458083	8	297	179	CCNA2,EZH2,IL33,PRC1,PTX3,SPARC,SPP1,VIM	Up
Mphage	IPF	Idiopathic Pulmonary Fibrosis	Idiopathic Pulmonary Fibrosis|disease	0.00446798	0.0161001	9	297	171	CXCL12,CXCR1,DECR1,HMOX1,IGF1,LGALS3,PCNA,TIMP4,VIM	Up
MyoFB	IPF	Idiopathic Pulmonary Fibrosis	Idiopathic Pulmonary Fibrosis|disease	0.000158554	0.00144078	12	297	184	ANXA1,COL18A1,COL1A1,COL3A1,CTGF,FN1,PTGS1,S100A4,SPARC,STK17B,VCAM1,VIM	Up
AT1	IPH	Idiopathic pulmonary hypertension	Idiopathic pulmonary hypertension|disease	0.00293988	0.0113784	5	85	185	BDNF,CAV1,EDN1,F2R,VEGFA	Up
Endo	IPH	Idiopathic pulmonary hypertension	Idiopathic pulmonary hypertension|disease	0.00274005	0.0110129	5	85	182	BCL2,EDN1,LIMK1,LXN,SERPINE1	Up
FB	IPH	Idiopathic pulmonary hypertension	Idiopathic pulmonary hypertension|disease	0.00198632	0.00864879	5	85	169	EDN1,FHL1,LXN,MAPK3,SERPINE1	Up
NK-T	IPH	Idiopathic pulmonary hypertension	Idiopathic pulmonary hypertension|disease	0.00255026	0.0104511	5	85	179	ALOX5,CAV1,EDN1,NOS3,TNF	Up
DC	PF	Pulmonary Fibrosis	Pulmonary Fibrosis|disease	0.00572859	0.0193109	9	326	162	CCL17,CCL4,FST,LMNA,MMP12,S100A4,SCGB3A2,SDC1,TGFBI	Up
FB	PF	Pulmonary Fibrosis	Pulmonary Fibrosis|disease	4.01475e-05	0.000559389	13	326	169	ANXA1,BGN,CCL11,CXCL13,DES,FN1,FST,LGALS1,MAPK3,MMRN1,TAGLN,THBS1,WT1	Up
Mphage-DC	PF	Pulmonary Fibrosis	Pulmonary Fibrosis|disease	0.00288127	0.011362	10	326	174	BAD,BSG,CXCL13,ELK1,FN1,KLF2,MSR1,PRTN3,TGFB2,THBS1	Up
MyoFB	PF	Pulmonary Fibrosis	Pulmonary Fibrosis|disease	0.000371947	0.00277632	12	326	184	ANXA1,BGN,CD44,COL1A2,COL3A1,FN1,FST,KLF9,S100A4,SPARC,TGFB2,THBS1	Up
NK-T	PF	Pulmonary Fibrosis	Pulmonary Fibrosis|disease	0.0107039	0.0328988	9	326	179	CCR8,CD36,LMNA,LTB4R,MFN2,NOTCH4,OGG1,S100A4,THY1	Up
AT1	PH	Pulmonary hypertension	Pulmonary Hypertension|phenotype	0.00121082	0.00602527	7	141	185	AGER,CAV1,EDN1,GATA6,RHOA,SMAD7,VEGFA	Up
AT2	PH	Pulmonary hypertension	Pulmonary Hypertension|phenotype	0.000764716	0.0048432	7	141	171	ACVRL1,AGER,COL1A1,EDN1,EDNRB,EPAS1,F3	Up
Baso	PH	Pulmonary hypertension	Pulmonary Hypertension|phenotype	0.00427032	0.0156578	6	141	174	APOE,EDNRB,F3,GATA6,HMOX1,PTGIS	Up
Bcell	PH	Pulmonary hypertension	Pulmonary Hypertension|phenotype	2.07903e-06	6.02584e-05	10	141	167	ACE,ADM,BCL2,CTGF,ECE1,EDN1,PDE3A,PDGFB,PTGIS,VWF	Up
DC	PH	Pulmonary hypertension	Pulmonary Hypertension|phenotype	8.89579e-05	0.000989017	8	141	162	ALOX5,BIRC5,CLU,EDN1,EGR1,FGFR1,GJA1,HIF1A	Up
Endo	PH	Pulmonary hypertension	Pulmonary Hypertension|phenotype	3.1689e-05	0.000509462	9	141	182	ADM,BCL2,CDKN1A,CDKN1B,EDN1,PDGFB,SERPINE1,SMAD7,VWF	Up
Erythro	PH	Pulmonary hypertension	Pulmonary Hypertension|phenotype	0.000177551	0.00154617	8	141	179	ACE,ACVRL1,AGER,CAV1,EDN1,PDE3A,SMAD6,VCAM1	Up
FB	PH	Pulmonary hypertension	Pulmonary Hypertension|phenotype	2.92511e-08	5.94947e-06	12	141	169	ACE,AGER,CLU,CTGF,EDN1,EPAS1,FBLN5,GJA1,LOX,PTGIS,SERPINE1,SMPD3	Up
Mono	PH	Pulmonary hypertension	Pulmonary Hypertension|phenotype	0.000664895	0.00448268	7	141	167	ACE,BCL2,CYSLTR1,EDN1,HMOX1,NOS3,VWF	Up
Mphage	PH	Pulmonary hypertension	Pulmonary Hypertension|phenotype	0.0172085	0.0444021	5	141	171	ALAS1,EDN1,HMOX1,SMAD7,VWF	Up
Mphage-DC	PH	Pulmonary hypertension	Pulmonary Hypertension|phenotype	0.00427032	0.0156578	6	141	174	ALOX5AP,CYBB,EDNRB,FGFR1,PTGIS,SELP	Up
MyoFB	PH	Pulmonary hypertension	Pulmonary Hypertension|phenotype	3.45301e-05	0.000515485	9	141	184	COL1A1,COL4A1,CTGF,EDN1,FBLN5,NOX4,PTGIS,SERPINE1,VCAM1	Up
NK-T	PH	Pulmonary hypertension	Pulmonary Hypertension|phenotype	0.000999804	0.00549892	7	141	179	ACE,ALOX5,CAV1,EDN1,F3,NOS3,TNF	Up
Pcyte	PH	Pulmonary hypertension	Pulmonary Hypertension|phenotype	0.00503139	0.0172387	6	141	180	CTGF,JUN,PRKG1,RELA,SERPINE1,SMAD7	Up
Tcell	PH	Pulmonary hypertension	Pulmonary Hypertension|phenotype	0.0153247	0.0410623	5	141	166	ACE,ACVRL1,BIRC5,ECE1,EDN1	Up
Mono	Allergic asthma	Allergic asthma	Allergic asthma|disease	0.000713664	0.0186445	7	161	148	CCL5,IFNGR2,IL18,IRF1,IRF7,LAT,TAP1	Down
Mphage-DC	Allergic asthma	Allergic asthma	Allergic asthma|disease	0.000347432	0.0181533	8	161	173	FCER2,HPGDS,IFNGR2,IL1B,IRF7,MMP9,TAP1,TLR1	Down
AT2	Asthma	Asthma	Asthma|disease	0.000572222	0.0186445	23	1091	162	ABCC4,AREG,BIRC5,C5,CCL5,CD160,CD2,CD28,CD44,COMMD10,FCER1G,FGFR1OP,GIMAP4,IL18R1,ITGB6,LDLR,PTGS2,SELL,TGFB1,TRAF2,TSC22D3,ZFP36,ZNF618	Down
Baso	Asthma	Asthma	Asthma|disease	9.81331e-05	0.00683661	25	1091	163	ACTB,ANXA1,ARG2,C3,CAMP,CCR2,CIB2,CTGF,FCER1A,FCER1G,FPR2,GSN,HCCS,HP,JAKMIP1,LGALS1,MMP8,MMP9,MS4A3,RAMP1,RORA,RUNX1,S100A8,S100A9,SELL	Down
Bcell	Asthma	Asthma	Asthma|disease	8.00047e-05	0.00683661	25	1091	161	AHSA1,CCL5,CCR7,CD1D,CD2,CD55,CD69,CIB1,FCER1G,GATA1,HDAC2,HDAC9,HNRNPU,HSPA4,IL17RA,IL2RB,IL7R,IRF7,LBR,LTB,RGS2,SELL,ST13,STAT1,TSC22D3	Down
Mphage-DC	Asthma	Asthma	Asthma|disease	1.40171e-05	0.00292958	28	1091	173	ACSL3,AXL,CD19,CTSS,EBI3,FCER1G,FCER2,FUCA2,HEXB,HLA-DQA1,HLA-DQB1,HLA-DRB5,HPGDS,IL1B,IRF7,JUND,LGALS3,LTB,MMP12,MMP9,NFKB2,PRMT2,RUNX1,RUNX3,SQSTM1,TGFBR1,TLR1,TNFRSF1B	Down
Tcell	Asthma	Asthma	Asthma|disease	0.000971472	0.0225597	22	1091	158	ABCC4,ALOX5,CCR9,CD55,CD69,CX3CR1,CYBB,FCER1G,GORASP1,HNRNPU,IFNG,IL13RA1,IRGM,MAPK3,MS4A1,PAFAH1B1,PSIP1,S100A8,S100A9,STAT1,STIP1,TSC22D3	Down
Baso	COPD	COPD	Chronic Obstructive Airway Disease|disease	0.000503932	0.0186445	15	554	163	ACTB,CAMP,CCR2,CD177,CIB2,CTGF,HCK,LCN2,MIA,MMP9,NCF4,S100A8,S100A9,SELL,TCF4	Down
Mphage-DC	COPD	COPD	Chronic Obstructive Airway Disease|disease	0.00261505	0.0496859	14	554	173	CD74,CTSS,GZMA,HPGDS,HSPD1,IL10RA,IL1B,LTB,MMP12,MMP13,MMP9,MYO1E,PLA2G2D,TNFRSF1B	Down
NK-T	COPD	COPD	Chronic Obstructive Airway Disease|disease	0.00247921	0.0496859	14	554	172	AAAS,AHCY,CD74,CST3,EGR1,GZMA,HAUS8,IL1B,ITGAL,KLF2,MIB1,MMP9,NCF1,SELL	Down
MyoFB	PH	Pulmonary hypertension	Pulmonary Hypertension|phenotype	0.00068882	0.0186445	7	141	168	ADM,ANGPT2,APOE,CX3CL1,ID1,JUN,SMAD6	Down

## Sheet: b_drugTargets
Approved.symbol	cellTypeGroup	trendGroup	drugNameCurated	drugNote	drugEffect	diseaseCurated	cellUniNum	trendUniGroup	withLigandReceptorPairs
PTGIS	Baso///Bcell///FB///Mphage-DC///MyoFB	Up///Up///Up///Up///Up	Epoprostenol	Agonist of P2RY12, PTGIR; Inducer of PTGIS	Inducer	primary pulmonary hypertension	5	Up	No
EDNRB	AT2///Baso///Mphage-DC	Up///Up///Up	Ambrisentan	Antagonist of EDNRA, EDNRB	Antagonist	pulmonary artery hypertension	3	Up	No
EDNRB	AT2///Baso///Mphage-DC	Up///Up///Up	Bosentan	Antagonist of EDNRA, EDNRB	Antagonist	pulmonary hypertension	3	Up	No
EDNRB	AT2///Baso///Mphage-DC	Up///Up///Up	Macitentan	Antagonist of EDNRA, EDNRB	Antagonist	pulmonary hypertension	3	Up	No
EDNRB	AT2///Baso///Mphage-DC	Up///Up///Up	Sitaxentan	Antagonist of EDNRA, EDNRB	Antagonist	pulmonary hypertension	3	Up	No
PLAT	Endo///LymEndo	Up///Down	Iloprost	Agonist of PTGIR, PTGER1, PTGDR2; Inducer of PDE4A, PDE4B, PDE4C, PDE4D; Unknown to PLAT	Unknown	pulmonary arterial hypertension	2	Up///Down	No
FGFR1	DC///Mphage-DC	Up///Up	Nintedanib	inhibitor of FLT1, KDR, FLT3, FLT4, PDGFRA, PDGFRB, FGFR1, FGFR3, LCK, LYN, SRC	inhibitor	pulmonary fibrosis	2	Up	Yes
FGFR3	AT2///Bcell///Endo///Mono///NK-T	Up///Up///Up///Up///Up	Nintedanib	inhibitor of FLT1, KDR, FLT3, FLT4, PDGFRA, PDGFRB, FGFR1, FGFR3, LCK, LYN, SRC	inhibitor	pulmonary fibrosis	5	Up	Yes
FLT1	Endo///FB///Cliated	Up///Up///Down	Nintedanib	inhibitor of FLT1, KDR, FLT3, FLT4, PDGFRA, PDGFRB, FGFR1,FGFR2, FGFR3, LCK, LYN, SRC	inhibitor	pulmonary fibrosis	3	Up///Down	Yes
FLT3	Mono	Up	Nintedanib	inhibitor of FLT1, KDR, FLT3, FLT4, PDGFRA, PDGFRB, FGFR1,FGFR2, FGFR3, LCK, LYN, SRC	inhibitor	pulmonary fibrosis	1	Up	Yes
LCK	Bcell///DC///Erythro	Down///Down///Down	Nintedanib	inhibitor of FLT1, KDR, FLT3, FLT4, PDGFRA, PDGFRB, FGFR1, FGFR3, LCK, LYN, SRC	inhibitor	pulmonary fibrosis	3	Down	Yes
SRC	Tcell	Up	Nintedanib	inhibitor of FLT1, KDR, FLT3, FLT4, PDGFRA, PDGFRB, FGFR1, FGFR3, LCK, LYN, SRC	inhibitor	pulmonary fibrosis	1	Up	No
FGFR2	AT2	Down	Nintedanib	inhibitor of FLT1, KDR, FLT3, FLT4, PDGFRA, PDGFRB, FGFR1,FGFR2, FGFR3, LCK, LYN, SRC	inhibitor	pulmonary fibrosis	1	Down	Yes
ATP1A1	AT1///Baso///Endo///MegK	Up///Up///Up///Up	Almitrine	Agonist of ATP1A1	Agonist	COPD	4	Up	No
ADRB2	Cliated	Up	Clenbuterol	Agonist of ADRB1, ADRB2, ADRB3; Unknown to NGF, TNF	Agonist	asthma	1	Up	Yes
ADRB2	Cliated	Up	Isoetarine	Agonist of ADRB1, ADRB2	Agonist	asthma	1	Up	Yes
ADRB2	Cliated	Up	Pirbuterol	Agonist of ADRB1, ADRB2	Agonist	asthma	1	Up	Yes
ADRB2	Cliated	Up	Procaterol	Agonist of ADRB2	Agonist	asthma	1	Up	Yes
ADRB2	Cliated	Up	Terbutaline	Agonist of ADRB1, ADRB2, ADRB3	Agonist	asthma	1	Up	Yes
ADRB2	Cliated	Up	Orciprenaline	Agonist of ADRB2	Agonist	asthma	1	Up	Yes
ADRB2	Cliated	Up	Formoterol	Agonist of ADRB1, ADRB2, ADRB3	Agonist	asthma, COPD	1	Up	Yes
ADRB2	Cliated	Up	Indacaterol	Agonist of ADRB2	Agonist	COPD	1	Up	Yes
ADRB2	Cliated	Up	Levosalbutamol	Agonist of ADRB2	Agonist	asthma, COPD	1	Up	Yes
ADRB2	Cliated	Up	Salbutamol	Agonist of ADRB1, ADRB2, ADRB3	Agonist	asthma, COPD	1	Up	Yes
ADRB2	Cliated	Up	Salmeterol	Agonist of ADRB1, ADRB2, ADRB3	Agonist	asthma, COPD	1	Up	Yes
ADRB2	Cliated	Up	Arformoterol	Agonist of ADRB2	Agonist	COPD	1	Up	Yes
ADRB2	Cliated	Up	Olodaterol	Agonist of ADRB2	Agonist	COPD	1	Up	Yes
ADRB2	Cliated	Up	Vilanterol	Agonist of ADRB2	Agonist	COPD	1	Up	Yes
CHRM2	Erythro	Down	Ipratropium	Antagonist of CHRM1, CHRM2, CHRM3	Antagonist	asthma, COPD	1	Down	No
CHRM2	Erythro	Down	Tiotropium	Antagonist of CHRM1, CHRM2, CHRM3; Unknown to CHRM4, CHRM5	Antagonist	asthma, COPD	1	Down	No
CHRM2	Erythro	Down	Aclidinium	Antagonist of CHRM1, CHRM2, CHRM3, CHRM4, CHRM5	Antagonist	COPD	1	Down	No
CHRM2	Erythro	Down	Glycopyrronium	Antagonist of CHRM1, CHRM2, CHRM3	Antagonist	COPD	1	Down	No
CHRM2	Erythro	Down	Umeclidinium	Antagonist of CHRM1, CHRM2, CHRM3, CHRM4, CHRM5	Antagonist	COPD	1	Down	No
NR3C1	LymEndo	Down	Beclometasone	Agonist of NR3C1; inhalted	Agonist	asthma	1	Down	No
NR3C1	LymEndo	Down	Mometasone	Agonist of NR3C1, PGR	Agonist	asthma	1	Down	No
NR3C1	LymEndo	Down	Budesonide	Agonist of NR3C1	Agonist	asthma, COPD	1	Down	No
NR3C1	LymEndo	Down	Fluticasone	Agonist of NR3C1, PGR; Antagonist of NR3C2	Agonist	asthma, COPD	1	Down	No
NR3C1	LymEndo	Down	Fluticasone	Agonist of NR3C1, PGR; Antagonist of NR3C2; inhibitor of PLA2G4A	Agonist	asthma, COPD	1	Down	No
TNF	NK-T	Up	Clenbuterol	Agonist of ADRB1, ADRB2, ADRB3; Unknown to NGF, TNF	Unknown	asthma	1	Up	No
ALOX5	DC///NK-T///Tcell	Up///Up///Down	Montelukast	Antagonist of CYSLTR1; Unknown to ALOX5	Unknown	asthma	3	Up///Down	Yes
ALOX5	DC///NK-T///Tcell	Up///Up///Down	Zileuton	Inhibitor of ALOX5	Inhibitor	asthma	3	Up///Down	Yes
FCER1A	Baso	Down	Omalizumab	Inhibitor of FCER1A, MS4A2	Inhibitor	asthma	1	Down	No
PDE4B	AT2///Endo///Erythro///MegK///Mono///NK-T	Up///Up///Up///Up///Up///Up	Dyphylline	Inhibitor of PDE4A, PDE4B, PDE4C, PDE4D, PDE7A, PDE7B; Antagonist of ADORA1, ADORA2A	Inhibitor	asthma	6	Up	No
PDE4B	AT2///Endo///Erythro///MegK///Mono///NK-T	Up///Up///Up///Up///Up///Up	Enprofylline	Inhibitor of PDE4A, PDE4B, ADORA1, ADORA2A, ADORA3; antagonist of ADORA2B	Inhibitor	asthma	6	Up	No
PDE4B	AT2///Endo///Erythro///MegK///Mono///NK-T	Up///Up///Up///Up///Up///Up	Theophylline	Activator of HDAC2; Inhibitor of PDE4B, PDE5A, PDE4A, PDE3A; Antagonist of ADORA1, ADORA2A, ADORA2B; Unknown to TTLL3	Inhibitor	asthma, COPD	6	Up	No
PDE4B	AT2///Endo///Erythro///MegK///Mono///NK-T	Up///Up///Up///Up///Up///Up	Roflumilast	Inhibitor of PDE4A, PDE4B, PDE4C, PDE4D	Inhibitor	COPD	6	Up	No
PDE4B	AT2///Endo///Erythro///MegK///Mono///NK-T	Up///Up///Up///Up///Up///Up	Iloprost	Agonist of PTGIR, PTGER1, PTGDR2; Inducer of PDE4A, PDE4B, PDE4C, PDE4D; Unknown to PLAT	Inducer	pulmonary arterial hypertension	6	Up	No
PDE7B	NK-T	Up	Dyphylline	Inhibitor of PDE4A, PDE4B, PDE4C, PDE4D, PDE7A, PDE7B; Antagonist of ADORA1, ADORA2A	Inhibitor	asthma	1	Up	No
CYSLTR1	Mono	Up	Montelukast	Antagonist of CYSLTR1; Unknown to ALOX5	Antagonist	asthma	1	Up	No
CYSLTR1	Mono	Up	Nedocromil	Inibitor of CYSLTR1; Antagonist of CYSLTR2, FPR1; Unknown to PTGDR, HSP90AA1	Inhibitor	asthma	1	Up	No
CYSLTR1	Mono	Up	Zafirlukast	Antagonist of CYSLTR1	Antagonist	asthma	1	Up	No
PDE3A	Bcell///Erythro	Up///Up	Oxtriphylline	Activator of HDAC2; Inhibitor of PDE3A, PDE4A; Antagonist of ADORA2A, ADORA1	Inhibitor	asthma, COPD	2	Up	No
PDE3A	Bcell///Erythro	Up///Up	Aminophylline	Activator of HDAC2; Inhibitor of PDE3A, Antagonist of ADORA1 and ADORA3	Inhibitor	asthma, COPD	2	Up	No
PDE3A	Bcell///Erythro	Up///Up	Theophylline	Activator of HDAC2; Inhibitor of PDE4B, PDE5A, PDE4A, PDE3A; Antagonist of ADORA1, ADORA2A, ADORA2B; Unknown to TTLL3	Inhibitor	asthma, COPD	2	Up	No
HDAC2	Bcell	Down	Oxtriphylline	Activator of HDAC2; Inhibitor of PDE3A, PDE4A; Antagonist of ADORA2A, ADORA1	Activator	asthma, COPD	1	Down	No
HDAC2	Bcell	Down	Aminophylline	Activator of HDAC2; Inhibitor of PDE3A, Antagonist of ADORA1 and ADORA3	Activator	asthma, COPD	1	Down	No
HDAC2	Bcell	Down	Theophylline	Activator of HDAC2; Inhibitor of PDE4B, PDE5A, PDE4A, PDE3A; Antagonist of ADORA1, ADORA2A, ADORA2B; Unknown to TTLL3	Activator	asthma, COPD	1	Down	No
TTLL3	Erythro	Up	Theophylline	Activator of HDAC2; Inhibitor of PDE4B, PDE5A, PDE4A, PDE3A; Antagonist of ADORA1, ADORA2A, ADORA2B; Unknown to TTLL3	Unknown	asthma, COPD	1	Up	No

## Sheet: c_GSEA
Pathway	Pval	Padj	ES	NES	Size	LeadingEdge
REACTOME_ECM_PROTEOGLYCANS	3.65043e-05	0.0187764	0.61637	2.07683	57	LRP4;LAMA3;VTN;MATN4;COL6A6;TGFB2;COL4A3;ITGA2;COL4A4;FN1;SERPINE1;ITGB6;AGRN;ITGA2B;LAMC1;BGN;SPARC;COL5A2;VCAN;COL4A2;COL6A3;COL5A1;COL6A1;COL4A5;COL1A2;NCAM1;LAMA4;COL1A1;COL5A3;COL4A6
REACTOME_NON_INTEGRIN_MEMBRANE_ECM_INTERACTIONS	3.66012e-05	0.0187764	0.593475	1.9721	53	LAMA3;VTN;ITGB4;COL4A3;ITGA2;COL4A4;FN1;PDGFB;THBS1;AGRN;LAMC1;COL5A2;SDC4;COL4A2;COL5A1;COL4A5;COL1A2;LAMA4;COL1A1;LAMC3;COL5A3;COL4A6;COL4A1;ITGB5;COL3A1;CASK;ACTN1;LAMB2;LAMA5;TNC;LAMC2
REACTOME_COLLAGEN_CHAIN_TRIMERIZATION	9.36312e-05	0.0320219	0.704847	2.01985	26	COL19A1;COL6A6;COL4A3;COL4A4;COL15A1;COL8A1;COL5A2;COL4A2;COL6A3;COL5A1;COL6A1;COL4A5;COL1A2;COL1A1;COL5A3;COL4A6;COL18A1;COL4A1;COL16A1;COL3A1
REACTOME_MET_ACTIVATES_PTK2_SIGNALING	0.000150116	0.0385048	0.696156	1.97594	25	LAMA3;HGF;SRC;ITGA2;FN1;LAMC1;COL5A2;MET;COL5A1;COL1A2;LAMA4;COL1A1;LAMC3;COL5A3;PTK2;ITGA3;COL3A1;LAMB2;LAMA5;LAMC2
REACTOME_EXTRACELLULAR_MATRIX_ORGANIZATION	0.000323895	0.0664632	0.39074	1.59183	205	LRP4;COL19A1;LAMA3;MMP3;KLKB1;VTN;MATN4;FBLN2;VCAM1;COL6A6;MFAP4;ITGB4;TGFB2;COL4A3;MMP2;ITGA2;COL4A4;FN1;CMA1;JAM2;SERPINE1;PDGFB;PHYKPL;ADAMTS14;FBLN5;ITGA5;COL15A1;BMP2;SPP1;THBS1;CAPN5;NID2;ITGB6;AGRN;ITGA2B;ADAMTS2;ADAMTS9;LAMC1;CD44;COL8A1;LTBP2;BGN;SPARC;COL5A2;NCSTN;CAPN7;SDC4;VCAN;COL4A2;COL6A3;COL5A1;LOXL3;COL6A1;LOX;COL4A5;COL1A2;NCAM1;VWF;LAMA4;COL1A1;LAMC3;COL5A3;COL4A6;P4HA1;COL18A1…
REACTOME_LAMININ_INTERACTIONS	0.000877635	0.124479	0.636888	1.85462	28	LAMA3;ITGB4;COL4A3;ITGA2;COL4A4;NID2;LAMC1;COL4A2;COL4A5;LAMA4;LAMC3;COL4A6;COL18A1;COL4A1;ITGA3;LAMB2;NID1;LAMA5;ITGA1;LAMC2
REACTOME_CROSSLINKING_OF_COLLAGEN_FIBRILS	0.00121325	0.124479	0.72558	1.84977	16	COL4A3;COL4A4;COL4A2;LOXL3;LOX;COL4A5;COL1A2;COL1A1;COL4A6;COL4A1;BMP1
REACTOME_ASSEMBLY_OF_COLLAGEN_FIBRILS_AND_OTHER_MULTIMERIC_STRUCTURES	0.000773908	0.124479	0.570361	1.81311	42	LAMA3;MMP3;COL6A6;ITGB4;COL4A3;COL4A4;COL15A1;COL8A1;COL5A2;COL4A2;COL6A3;COL5A1;LOXL3;COL6A1;LOX;COL4A5;COL1A2;COL1A1;COL5A3;COL4A6;COL18A1;COL4A1;PLEC;COL3A1;CTSV;BMP1
REACTOME_COLLAGEN_BIOSYNTHESIS_AND_MODIFYING_ENZYMES	0.00112476	0.124479	0.555557	1.77446	43	COL19A1;COL6A6;COL4A3;COL4A4;ADAMTS14;COL15A1;ADAMTS2;COL8A1;COL5A2;COL4A2;COL6A3;COL5A1;COL6A1;COL4A5;COL1A2;COL1A1;COL5A3;COL4A6;P4HA1;COL18A1;COL4A1;COL16A1;P4HA3;COL3A1;BMP1
REACTOME_COLLAGEN_FORMATION	0.00102009	0.124479	0.512974	1.74486	60	COL19A1;LAMA3;MMP3;COL6A6;ITGB4;COL4A3;COL4A4;ADAMTS14;COL15A1;ADAMTS2;COL8A1;COL5A2;COL4A2;COL6A3;COL5A1;LOXL3;COL6A1;LOX;COL4A5;COL1A2;COL1A1;COL5A3;COL4A6;P4HA1;COL18A1;COL4A1;COL16A1;PLEC;P4HA3;COL3A1;CTSV;BMP1
REACTOME_COMPLEMENT_CASCADE	0.00138858	0.129516	0.638681	1.8128	25	C8G;VTN;CR2;GZMM;COLEC11;CD59;C6;C2;C5AR1;CD19;C5AR2;C1QA;CFP;C1QC;C3;SERPING1
REACTOME_SYNDECAN_INTERACTIONS	0.0016067	0.137372	0.6273	1.81287	27	VTN;ITGB4;ITGA2;FN1;THBS1;COL5A2;SDC4;COL5A1;COL1A2;COL1A1;COL5A3;ITGB5;COL3A1;CASK;ACTN1;TNC
REACTOME_MET_PROMOTES_CELL_MOTILITY	0.0026198	0.206762	0.568098	1.74758	36	LAMA3;HGF;SRC;ITGA2;FN1;LAMC1;COL5A2;MET;COL5A1;COL1A2;LAMA4;COL1A1;LAMC3;COL5A3;PTK2;ITGA3;COL3A1;LAMB2;LAMA5;LAMC2
REACTOME_NETRIN_1_SIGNALING	0.00423626	0.310458	0.553198	1.70175	36	PRKCQ;TRPC6;ROBO1;ABLIM2;PAK1;SRC;TRPC3;FYN
REACTOME_PKA_ACTIVATION_IN_GLUCAGON_SIGNALLING	0.0047582	0.319225	0.685034	1.7464	16	PRKAR1B;ADCY1;ADCY8;ADCY7;ADCY6
REACTOME_ADENYLATE_CYCLASE_ACTIVATING_PATHWAY	0.00497816	0.319225	0.767736	1.73497	10	ADCY1;GNAL;ADCY8;ADCY7;ADCY6;ADCY5
REACTOME_CREB1_PHOSPHORYLATION_THROUGH_THE_ACTIVATION_OF_ADENYLATE_CYCLASE	0.00616071	0.350424	0.758911	1.71502	10	PRKAR1B;ADCY1;ADCY8
REACTOME_PKA_MEDIATED_PHOSPHORYLATION_OF_CREB	0.00688484	0.350424	0.651299	1.7124	18	PRKAR1B;ADCY1;ADCY8;ADCY7;ADCY6
REACTOME_ACTIVATION_OF_RAC1	0.00721526	0.350424	0.721852	1.71121	12	NCK2;ROBO1;PAK1;PAK6;SOS1;SLIT2;PAK3
REACTOME_VISUAL_PHOTOTRANSDUCTION	0.00738569	0.350424	0.490902	1.60771	49	RBP4;PRKCQ;PPEF1;RGS9;LRP8;MYO7A;GPC4;APOA2;GPC1;AGRN
REACTOME_SIGNALING_BY_PDGF	0.00751397	0.350424	0.486514	1.60453	51	NCK2;PIK3CB;COL6A6;COL4A3;SRC;COL4A4;PDGFRA;PDGFB;SPP1;THBS1;SOS1;BCAR1;COL5A2;COL4A2;COL6A3;COL5A1;COL6A1;COL4A5;PDGFC;COL5A3;COL4A1;KRAS;COL3A1;STAT6;THBS3;PTPN12;PLAT;HRAS;COL6A2
REACTOME_INTEGRIN_CELL_SURFACE_INTERACTIONS	0.00639007	0.350424	0.456333	1.57757	66	VTN;VCAM1;COL6A6;COL4A3;ITGA2;COL4A4;FN1;JAM2;ITGA5;SPP1;THBS1;ITGB6;AGRN;ITGA2B;CD44;COL8A1;COL5A2;COL4A2;COL6A3;COL5A1;COL6A1;COL4A5;COL1A2;VWF;COL1A1;COL5A3;COL4A6;COL18A1;COL4A1;COL16A1;ITGB5;ITGA3
REACTOME_IMMUNOREGULATORY_INTERACTIONS_BETWEEN_A_LYMPHOID_AND_A_NON_LYMPHOID_CELL	0.00836139	0.372991	-0.432922	-1.55125	69	ICAM4;SIGLEC1;PIANP;CD8A;CD226;CD300LB;LILRA5;KLRG1;CD96;CD200R1;CD300LG;TREML2;FCGR2B;HCST;CD3E;PILRA;SH2D1A
REACTOME_ANCHORING_FIBRIL_FORMATION	0.00884939	0.378311	0.698137	1.68859	13	LAMA3;COL4A3;COL4A4;COL4A2;COL4A5;COL1A2;COL1A1;COL4A6;COL4A1;BMP1;LAMC2
REACTOME_SLC_MEDIATED_TRANSMEMBRANE_TRANSPORT	0.0102538	0.420815	-0.35626	-1.42479	138	SLC45A3;SLC22A4;SLC4A4;SLC29A4;SLC25A10;SLC8A1;SLC43A1;SLC9A9;SLC22A3;SLCO4C1;SLC6A14;SLC1A6;SLC8B1;SLC2A6;SLC2A8;SLC6A7;SLC14A1;SLC41A2;SLC24A4;SLC5A3;SLC5A6;SLCO2B1;SLC39A3;SLC35D2;SLC25A26;SLC16A10;SLC8A2;SLC30A6;SLC6A2
REACTOME_ELASTIC_FIBRE_FORMATION	0.0111295	0.439187	0.522646	1.60776	36	VTN;FBLN2;MFAP4;TGFB2;FN1;FBLN5;ITGA5;BMP2;ITGB6;LTBP2;LOXL3;LOX
REACTOME_MOLECULES_ASSOCIATED_WITH_ELASTIC_FIBRES	0.0119951	0.455816	0.547309	1.61799	30	VTN;FBLN2;MFAP4;TGFB2;FN1;FBLN5;BMP2;ITGB6;LTBP2
REACTOME_GRB2_SOS_PROVIDES_LINKAGE_TO_MAPK_SIGNALING_FOR_INTEGRINS	0.0147359	0.521347	0.69171	1.63976	12	SRC;FN1;ITGA2B;SOS1;VWF;PTK2
REACTOME_DEGRADATION_OF_THE_EXTRACELLULAR_MATRIX	0.0145021	0.521347	0.406599	1.46976	86	COL19A1;LAMA3;MMP3;KLKB1;COL6A6;COL4A3;MMP2;COL4A4;FN1;CMA1;PHYKPL;COL15A1;SPP1;CAPN5;ADAMTS9;LAMC1;CD44;COL8A1;COL5A2;NCSTN;CAPN7;COL4A2;COL6A3;COL5A1;COL6A1;COL4A5;COL1A2;COL1A1;COL5A3;COL4A6;COL18A1;ADAMTS1;COL4A1;COL16A1
REACTOME_ADENYLATE_CYCLASE_INHIBITORY_PATHWAY	0.0166498	0.568544	0.674677	1.63185	13	ADCY1;GNAL;ADCY8;ADCY7;ADCY6;GNAI1;ADCY5
REACTOME_FATTY_ACID_METABOLISM	0.0171782	0.568544	0.364288	1.40033	129	PTGS1;DPEP1;PTGS2;ELOVL4;ACSBG1;ALOX15;EPHX2;PON3;ACAD10;MECR;TECRL;CYP1A1;PLA2G4A;PTGIS;ACBD7;ACSF2;DPEP2;LTC4S;SCD;PCCB;PPARD;ACOX1;FAAH;ACSF3;PTGR1;ACSL4;PRKAA2;EHHADH;ACBD6;MMAA
REACTOME_G1_S_SPECIFIC_TRANSCRIPTION	0.0179191	0.57453	-0.55397	-1.60755	25	TK1;CDT1;DHFR;CCNE1;LIN54;RRM2;LIN9;CDK1;TYMS;RBL1;POLA1
REACTOME_DCC_MEDIATED_ATTRACTIVE_SIGNALING	0.0213241	0.595596	0.709379	1.60309	10	ABLIM2;SRC;FYN;PTK2
REACTOME_NEPHRIN_FAMILY_INTERACTIONS	0.022464	0.595596	0.624184	1.59127	16	NCK2;PIK3CB;KIRREL3;FYN;ACTN4;CASK;ACTN1;IQGAP1
REACTOME_BINDING_AND_UPTAKE_OF_LIGANDS_BY_SCAVENGER_RECEPTORS	0.0230239	0.595596	0.533649	1.55399	28	SSC5D;MARCO;COLEC11;SCARB1;SPARC;COL4A2;COL1A2;COL1A1;COL4A1;HYOU1;COL3A1;SCARF1;HSP90AA1;LRP1
REACTOME_ARACHIDONIC_ACID_METABOLISM	0.0223182	0.595596	0.487286	1.51687	38	PTGS1;DPEP1;PTGS2;ALOX15;EPHX2;PON3;CYP1A1;PLA2G4A;PTGIS;DPEP2;LTC4S;FAAH;PTGR1
REACTOME_MITOCHONDRIAL_BIOGENESIS	0.0196348	0.595596	-0.413513	-1.47024	66	PPARGC1B;PPARA;MAPK11;CRTC1;CARM1;MAPK12;APOO;PPARGC1A;TFAM;MED1;CAMK4;NCOA2;TFB1M;TGS1;CRTC3;HELZ2;CHCHD3;MEF2C;NCOA1;NRF1;TBL1XR1;ATF2;CRTC2;TFB2M;NCOR1;DNAJC11;SSBP1
REACTOME_TRANSCRIPTIONAL_REGULATION_OF_GRANULOPOIESIS	0.0209571	0.595596	-0.534693	-1.57797	27	CSF3R;CDK2;LEF1;CEBPB;SPI1;MYB;IL6R;CEBPA;FLI1;CDKN1A;GATA2;TFDP2
REACTOME_RHO_GTPASES_ACTIVATE_NADPH_OXIDASES	0.0232201	0.595596	-0.562613	-1.58345	22	MAPK11;NOXO1;NCF2;S100A8;NCF1;NOX1;S100A9;NCF4;PRKCB;RAC2;CYBB;PIN1;PIK3R4;MAPK1;PRKCZ;CYBA;MAPK3
REACTOME_MYOGENESIS	0.021244	0.595596	-0.573995	-1.59714	21	MAP2K6;CDON;MAPK11;TCF3;MAPK12
REACTOME_P130CAS_LINKAGE_TO_MAPK_SIGNALING_FOR_INTEGRINS	0.0252534	0.62281	0.668218	1.58407	12	SRC;FN1;ITGA2B;BCAR1;VWF;PTK2
REACTOME_EPHRIN_SIGNALING	0.0254952	0.62281	0.608812	1.57627	17	NCK2;PAK1;SRC;FYN;EPHB4;PAK3
REACTOME_TRANSCRIPTIONAL_ACTIVATION_OF_MITOCHONDRIAL_BIOGENESIS	0.0270751	0.646024	-0.442992	-1.47479	47	PPARGC1B;PPARA;CRTC1;CARM1;PPARGC1A;TFAM;MED1;CAMK4;NCOA2;TFB1M;TGS1;CRTC3;HELZ2;MEF2C;NCOA1;NRF1;TBL1XR1;ATF2;CRTC2;TFB2M;NCOR1;SSBP1
REACTOME_SHC1_EVENTS_IN_ERBB4_SIGNALING	0.0329016	0.73385	0.687533	1.55372	10	EREG;HBEGF;SOS1;BTC;KRAS;ERBB4;HRAS
REACTOME_BIOSYNTHESIS_OF_SPECIALIZED_PRORESOLVING_MEDIATORS_SPMS	0.0323291	0.73385	0.628877	1.55052	14	PTGS2;ALOX15;EPHX2;CYP1A1;LTC4S;PTGR1
REACTOME_NEGATIVE_REGULATION_OF_THE_PI3K_AKT_NETWORK	0.032157	0.73385	0.389493	1.39492	81	FGF16;PIK3CB;HGF;TRIB3;IL1RL1;IRS2;SRC;PDGFRA;EREG;PDGFB;FYN;FGFR3;HBEGF;IER3;PIP5K1A;PPP2CB;CD19;PPP2R5D;FGF7;PHLPP2;MET;BTC;IL33
REACTOME_REGULATION_OF_TP53_ACTIVITY_THROUGH_ACETYLATION	0.0339915	0.742026	-0.501649	-1.5058	29	MAP2K6;ING5;TP53;BRPF3;MEAF6;ING2;AKT3;KAT6A;BRD1;PIP4K2B
REACTOME_CELL_CELL_COMMUNICATION	0.0356558	0.74659	0.384474	1.38282	83	NCK2;LAMA3;PIK3CB;CLDN7;CLDN11;ITGB4;FLNC;SRC;KIRREL3;KRT5;FYN;CLDN3;CDH6;JUP;CLDN18;PARD6B;PTK2;ACTN4;LIMS2;PLEC;CASK;ACTN1;FBLIM1;SFTPA1;IQGAP1;PXN;LAMC2;FERMT2;ACTG1;FLNA;F11R;PIK3CA
REACTOME_FOXO_MEDIATED_TRANSCRIPTION_OF_OXIDATIVE_STRESS_METABOLIC_AND_NEURONAL_GENES	0.0354165	0.74659	-0.542383	-1.52651	22	POMC;ABCA6;FOXO4;PPARGC1A;SIN3A;AGRP;FOXO6
REACTOME_LEISHMANIA_INFECTION	0.0368774	0.756725	0.333352	1.3139	155	DPEP1;RAMP3;PRKAR1B;NT5E;ADCY1;ADORA2B;FCGR1A;ENTPD5;GPR27;MYO5A;SRC;ADCY8;DVL3;WIPF3;GPR39;ADCY7;FYN;DVL2;BAIAP2;WASF1;IL1A;ADCY6;DPEP2;BTK
REACTOME_DEPOSITION_OF_NEW_CENPA_CONTAINING_NUCLEOSOMES_AT_THE_CENTROMERE	0.0384304	0.758261	0.57048	1.51956	19	CENPK;CENPM;CENPQ;MIS18A;RUVBL1;CENPO;CENPW;CENPP;RBBP4;CENPL
REACTOME_NCAM_SIGNALING_FOR_NEURITE_OUT_GROWTH	0.0378796	0.758261	0.442291	1.43692	47	COL6A6;ST8SIA2;COL4A3;SRC;COL4A4;FYN;AGRN;SOS1;COL5A2;COL4A2;COL6A3;COL5A1;PRNP;COL6A1;COL4A5;NCAM1;COL5A3;PTK2;COL4A1;KRAS;COL3A1;CACNB2;CACNB1;HRAS;CACNA1D;COL6A2;FGFR1
REACTOME_THE_PHOTOTRANSDUCTION_CASCADE	0.040966	0.764203	0.594266	1.515	16	PRKCQ;PPEF1;RGS9
REACTOME_KERATINIZATION	0.0402801	0.764203	0.520458	1.49146	26	DSP;KRT18;KRT8;PRSS8;KRT5;KRT4;EVPL;KRT19;KRT79;JUP;PCSK6
REACTOME_FORMATION_OF_THE_CORNIFIED_ENVELOPE	0.0402801	0.764203	0.520458	1.49146	26	DSP;KRT18;KRT8;PRSS8;KRT5;KRT4;EVPL;KRT19;KRT79;JUP;PCSK6
REACTOME_CA_DEPENDENT_EVENTS	0.0420685	0.770755	0.486915	1.45892	32	PRKAR1B;ADCY1;ADCY8;ADCY7;PLA2G4A;ADCY6;KPNA2
REACTOME_PLATELET_ACTIVATION_SIGNALING_AND_AGGREGATION	0.0440339	0.792611	0.309793	1.26664	212	PDPN;SELP;PRKCQ;TRPC6;F5;PIK3CB;HGF;CLEC3B;P2RY12;SYTL4;TGFB2;SRC;TRPC3;FN1;DGKH;SCG3;MPL;SERPINE1;PDGFB;TOR4A;FYN;PLA2G4A;F2RL2;THBS1;ITGA2B;VEGFC;SOS1;BCAR1;SPARC;CTSW;CD109;VEGFB;GNAI1;RAPGEF4;DGKG;COL1A2;ECM1;VWF;GNG7;CAP1;COL1A1;ABCC4;PTK2;GP5;NHLRC2;STXBP2
REACTOME_EFFECTS_OF_PIP2_HYDROLYSIS	0.0477486	0.828778	0.523301	1.47145	24	PRKCQ;TRPC6;TRPC3;DGKH;DGKG;ABHD12;DGKA;ITPR2;MGLL;PRKCE
REACTOME_NCAM1_INTERACTIONS	0.0474023	0.828778	0.490776	1.45087	30	COL6A6;ST8SIA2;COL4A3;COL4A4;AGRN;COL5A2;COL4A2;COL6A3;COL5A1;PRNP;COL6A1;COL4A5;NCAM1;COL5A3;COL4A1;COL3A1;CACNB2;CACNB1;CACNA1D;COL6A2
REACTOME_G_ALPHA_I_SIGNALLING_EVENTS	0.0492743	0.828778	0.311684	1.26235	195	RBP4;PRKCQ;PPEF1;RGS9;PRKAR1B;LRP8;ADCY1;PENK;MYO7A;ACKR3;P2RY12;PPP1R1B;CCR1;SRC;GNAL;ADCY8;GNAO1;CCR6;ADCY7;GPC4;RGS4;PLA2G4A;RGS11;APOA2;GPSM1;GPC1;RGS1;ADCY6;KPNA2;CCL25;AGRN;CXCL13;C5AR1;CXCR6;NPY1R;CHRM2;ANXA1;PPP2CB;PPP2R5D;APLNR;SDC4;GNAI1;FPR2;CX3CR1;APLN;GNG7;P2RY14
REACTOME_NEF_MEDIATES_DOWN_MODULATION_OF_CELL_SURFACE_RECEPTORS_BY_RECRUITING_THEM_TO_CLATHRIN_ADAPTERS	0.0491413	0.828778	-0.557947	-1.49076	18	AP1S3;LCK;CD28;PACS1;AP1B1;CD4;AP2A2;ATP6V1H
REACTOME_SURFACTANT_METABOLISM	0.0504256	0.834462	0.582955	1.48616	16	ADORA2B;P2RY2;CSF2RA;SFTPB;CCDC59;LMCD1;ABCA3;SFTPA1;NAPSA;CTSH;SFTPC
REACTOME_RRNA_MODIFICATION_IN_THE_NUCLEUS_AND_CYTOSOL	0.0530718	0.85403	0.415661	1.38123	53	HEATR1;UTP20;PNO1;RRP7A;DHX37;NOP2;WDR75;RRP9;UTP15;TSR3;NOP14;UTP14A;WDR43;KRR1;MPHOSPH10;RRP36;TBL3;DDX52;NOC4L;WDR36;DCAF13;NOL6;PDCD11
REACTOME_METABOLISM_OF_VITAMINS_AND_COFACTORS	0.0533999	0.85403	0.331944	1.2864	137	RBP4;NT5E;LRP8;PTGS2;SLC19A2;PDSS2;SLC25A32;MOCS3;PRKG2;PPCS;RNLS;GPC4;PTGIS;APOA2;GPC1;CD38;AGRN;AASDHPPT;PARP4;PCCB;SDC4;PDSS1;GPHN;FLAD1;PARP16;MTHFR;NADK2;PARP9;ENPP1;NAMPT;GSTO1;MMAA;COQ3;MTHFS;LRAT;PARP6;PANK1;RETSAT;MOCOS;MTR;VKORC1L1;LDLR;MMADHC;THTPA;HSP90AA1;TCN2;COASY;LRP1;LMBRD1;MTHFD1;PANK4
REACTOME_FREE_FATTY_ACIDS_REGULATE_INSULIN_SECRETION	0.0541052	0.85403	-0.655278	-1.50018	10	GNA14;GNA15;PLCB3;PLCB2;ACSL3;PLCB1;GNAQ
REACTOME_PEPTIDE_HORMONE_METABOLISM	0.0556753	0.865498	-0.408684	-1.37755	50	BCHE;ACE2;POMC;EXOC1;EXOC6;INHBB;SLC30A6;PLA2G7;ENPEP;AGT;GATA4;KIF5C;GHRL;INHA;CRHR2;EXOC2
REACTOME_OTHER_INTERLEUKIN_SIGNALING	0.0585802	0.897064	-0.538904	-1.46069	19	CSF3R;PRTN3;TYK2;CSF1R;CSF1;STX4;IL16;CD4;STX3
REACTOME_THROMBOXANE_SIGNALLING_THROUGH_TP_RECEPTOR	0.0607189	0.916141	-0.54551	-1.45753	18	GNA14;GNA15;GNA13;GNG2;GNG12;GNAQ;GNB1;GNG8;TBXA2R;GNG11
REACTOME_RESPONSE_TO_ELEVATED_PLATELET_CYTOSOLIC_CA2	0.0621599	0.92429	0.349744	1.29917	102	SELP;F5;HGF;CLEC3B;SYTL4;TGFB2;FN1;SCG3;SERPINE1;PDGFB;TOR4A;THBS1;ITGA2B;VEGFC;SPARC;CTSW;CD109;VEGFB;ECM1;VWF;CAP1;ABCC4;NHLRC2;STXBP2;PF4;ACTN4;SERPING1;FAM3C
REACTOME_SCAVENGING_BY_CLASS_A_RECEPTORS	0.0642452	0.939199	0.569265	1.45126	16	MARCO;COLEC11;COL4A2;COL1A2;COL1A1;COL4A1;COL3A1
REACTOME_FCGR3A_MEDIATED_IL10_SYNTHESIS	0.0665747	0.939199	0.457179	1.38888	34	PRKAR1B;ADCY1;FCGR1A;SRC;ADCY8;ADCY7;FYN;ADCY6;YES1
REACTOME_COLLAGEN_DEGRADATION	0.0659738	0.939199	0.434834	1.37553	41	COL19A1;MMP3;COL6A6;COL4A3;MMP2;COL4A4;PHYKPL;COL15A1;COL8A1;COL5A2;COL4A2;COL6A3;COL5A1;COL6A1;COL4A5;COL1A2;COL1A1;COL5A3;COL4A6;COL18A1;COL4A1;COL16A1
REACTOME_SIGNALING_BY_SCF_KIT	0.0668241	0.939199	-0.420683	-1.36791	42	SH2B2;CHEK1;GRAP2;MMP9;GRB7;LCK;VAV1;PIK3R3;FES
REACTOME_SIGNALING_BY_EGFR_IN_CANCER	0.0686745	0.939468	0.530001	1.42894	20	EREG;HBEGF;SOS1;BTC;KRAS;UBC;HSP90AA1;HRAS;PIK3CA;CDC37;PLCG1;EGF
REACTOME_GLUCAGON_SIGNALING_IN_METABOLIC_REGULATION	0.0679388	0.939468	0.49241	1.41108	26	PRKAR1B;ADCY1;ADCY8;ADCY7;ADCY6;GNG7;ADCY5;GNB4
REACTOME_MAPK_TARGETS_NUCLEAR_EVENTS_MEDIATED_BY_MAP_KINASES	0.0712977	0.962519	-0.459073	-1.38944	30	RPS6KA5;MAPK11;RPS6KA1;FOS;ELK1;DUSP7;DUSP4;MAPK7;JUN;RPS6KA2;DUSP3;PPP2R1B;MEF2C;MAPK8;ATF2;VRK3
REACTOME_TRIGLYCERIDE_METABOLISM	0.0737233	0.982339	0.510691	1.40782	22	AGMO;LPIN3;FABP12;DGAT1;FABP1;FABP4;LPIN1;DGAT2;GPD2;PRKACA;MGLL;FABP7;FABP5
REACTOME_GP1B_IX_V_ACTIVATION_SIGNALLING	0.0779784	1	0.618653	1.4336	11	SRC;COL1A2;VWF;COL1A1;GP5;GP9;FLNA
REACTOME_SYNTHESIS_OF_VERY_LONG_CHAIN_FATTY_ACYL_COAS	0.0832732	1	0.573784	1.41469	14	ELOVL4;ACSBG1;TECRL;ACSF3;ACSL4
REACTOME_TIGHT_JUNCTION_INTERACTIONS	0.0991528	1	0.561895	1.38538	14	CLDN7;CLDN11;CLDN3;CLDN18;PARD6B
REACTOME_NICOTINATE_METABOLISM	0.0852666	1	0.502022	1.38392	22	NT5E;PTGS2;RNLS;PTGIS;CD38;PARP4;PARP16;NADK2;PARP9;NAMPT
REACTOME_SHC1_EVENTS_IN_EGFR_SIGNALING	0.105532	1	0.597076	1.3836	11	EREG;HBEGF;SOS1;BTC;KRAS;HRAS
REACTOME_DARPP_32_EVENTS	0.0907875	1	0.512361	1.38138	20	PRKAR1B;PPP1R1B;PPP2CB;PPP2R5D;PDE4B;PPP2R1A;PRKACA
REACTOME_MET_ACTIVATES_RAS_SIGNALING	0.111064	1	0.609011	1.37627	10	HGF;SOS1;MET;KRAS;HRAS
REACTOME_METABOLISM_OF_FAT_SOLUBLE_VITAMINS	0.0828281	1	0.462781	1.36811	30	RBP4;LRP8;GPC4;APOA2;GPC1;AGRN;SDC4;LRAT;RETSAT;VKORC1L1;LDLR;LRP1;TTPA;RBP1;RDH11;HSPG2;LRP12
REACTOME_PLATELET_AGGREGATION_PLUG_FORMATION	0.0823321	1	0.458878	1.36653	31	SRC;FN1;MPL;ITGA2B;SOS1;BCAR1;RAPGEF4;COL1A2;VWF;COL1A1;PTK2;GP5
REACTOME_STRIATED_MUSCLE_CONTRACTION	0.101263	1	0.512527	1.3652	19	TNNT3;TNNI3;TNNC1;TMOD1;VIM;MYL1;ACTC1;TMOD3;TMOD2
REACTOME_HS_GAG_BIOSYNTHESIS	0.100011	1	0.491897	1.35601	22	HS6ST2;GPC4;HS3ST1;HS3ST6;GPC1;AGRN;SDC4;EXT1;HS6ST1;GLCE
REACTOME_MAP3K8_TPL2_DEPENDENT_MAPK1_3_ACTIVATION	0.11621	1	0.549818	1.3556	14	FBXW11;MAP3K8;MAP2K4;TNIP2;UBC;CHUK
REACTOME_IRAK1_RECRUITS_IKK_COMPLEX	0.126611	1	0.567704	1.34579	12	PELI3;PELI1;UBC;CHUK;TRAF6;UBE2V1
REACTOME_THE_CANONICAL_RETINOID_CYCLE_IN_RODS_TWILIGHT_VISION	0.133228	1	0.593439	1.34108	10	RBP4;MYO7A;LRAT;RBP1;RDH5;RDH11
REACTOME_SIGNALING_BY_ERBB2_IN_CANCER	0.113286	1	0.490093	1.33603	21	EREG;HBEGF;SOS1;BTC;KRAS;ERBB4;PTPN12;HSP90AA1;HRAS;PIK3CA;CDC37;PLCG1;EGF
REACTOME_HSP90_CHAPERONE_CYCLE_FOR_STEROID_HORMONE_RECEPTORS_SHR	0.0843942	1	0.415104	1.33179	44	FKBP5;NR3C2;ACTR10;HSPA8;AR;DYNC1H1;DNAJA2;STIP1;DNAJA1;TUBB2B;HSPA1L;HSP90AA1;TUBA1A;TUBB3;DNAJA4;DCTN5;DYNC1LI1;HSPA2;HSP90AB1;TUBB4B
REACTOME_SIGNAL_TRANSDUCTION_BY_L1	0.117548	1	0.487448	1.32882	21	PAK1;CSNK2A2;ITGA5;ITGA2B;NCAM1;ITGA9;FGFR1;ITGAV;CSNK2B;ITGB3
REACTOME_SMOOTH_MUSCLE_CONTRACTION	0.11118	1	0.45839	1.32473	27	MYL6B;PAK1;ANXA1;ITGB5;ACTG2;GUCY1A2;ITGA1;PXN;TPM3;ANXA2;MYH11;SORBS3
REACTOME_VASOPRESSIN_REGULATES_RENAL_WATER_HOMEOSTASIS_VIA_AQUAPORINS	0.107444	1	0.444426	1.32349	31	PRKAR1B;ADCY1;ADCY8;ADCY7;ADCY6;GNG7;ADCY5;GNB4;AQP1
REACTOME_PURINERGIC_SIGNALING_IN_LEISHMANIASIS_INFECTION	0.120849	1	0.485315	1.32301	21	NT5E;ENTPD5;IL1A;P2RX4;C3
REACTOME_SIGNALING_BY_PDGFRA_TRANSMEMBRANE_JUXTAMEMBRANE_AND_KINASE_DOMAIN_MUTANTS	0.143198	1	0.557493	1.32158	12	PIK3CB;PDGFRA;SOS1;KRAS;HRAS;PIK3CA;STAT3
REACTOME_PYRUVATE_METABOLISM_AND_CITRIC_ACID_TCA_CYCLE	0.0868322	1	0.40276	1.31905	49	D2HGDH;SLC16A1;ME1;SLC16A3;CS;PPARD;L2HGDH;ME3;IDH2;DLST;PDPR;PDHX;ADHFE1;LDHA;PDHA1;MPC1;MDH2;GSTZ1;SDHA;DLAT;VDAC1;BSG;HAGH;ACO2
REACTOME_NUCLEOBASE_BIOSYNTHESIS	0.146492	1	0.543004	1.31337	13	PPAT;IMPDH1;CAD;UMPS;GART;ADSL;PAICS
REACTOME_TNFR1_INDUCED_NFKAPPAB_SIGNALING_PATHWAY	0.122176	1	0.462669	1.31322	25	TAB3;USP2;TAB1;SHARPIN;RNF31;TRAF1;UBC;USP4;CHUK;OTUD7B
REACTOME_GRB2_EVENTS_IN_ERBB2_SIGNALING	0.150585	1	0.553378	1.31183	12	EREG;HBEGF;SOS1;BTC;KRAS;ERBB4;HRAS
REACTOME_NF_KB_ACTIVATION_THROUGH_FADD_RIP_1_PATHWAY_MEDIATED_BY_CASPASE_8_AND_10	0.157008	1	0.563546	1.3059	11	RNF135;DDX58;IFIH1;FADD;CHUK;MAVS
REACTOME_RA_BIOSYNTHESIS_PATHWAY	0.155433	1	0.550612	1.30527	12	CYP26B1;ADH1C;ALDH1A3;ALDH1A1;RDH5;DHRS3;ALDH1A2;RDH11;RDH14
REACTOME_G_ALPHA_Z_SIGNALLING_EVENTS	0.113229	1	0.425881	1.30189	35	PRKCQ;ADCY1;ADCY8;ADCY7;RGS4;ADCY6;GNAI1;GNG7;ADCY5;GNB4;RGS19
REACTOME_ADORA2B_MEDIATED_ANTI_INFLAMMATORY_CYTOKINES_PRODUCTION	0.0952992	1	0.394405	1.30075	51	RAMP3;PRKAR1B;ADCY1;ADORA2B;GPR27;ADCY8;GPR39;ADCY7;ADCY6
REACTOME_CLEC7A_DECTIN_1_INDUCES_NFAT_ACTIVATION	0.168132	1	0.572843	1.29454	10	NFATC2;ITPR2;AHCYL1;PPP3R1;NFATC3;ITPR3
REACTOME_AQUAPORIN_MEDIATED_TRANSPORT	0.12357	1	0.428315	1.29292	33	PRKAR1B;ADCY1;ADCY8;ADCY7;ADCY6;GNG7;ADCY5;GNB4;AQP1
REACTOME_SIGNALING_BY_MET	0.0884613	1	0.372048	1.29019	67	LAMA3;HGF;STAM;SRC;ITGA2;FN1;PTPRJ;SOS1;LAMC1;COL5A2;MET;COL5A1;COL1A2;LAMA4;COL1A1;LAMC3;COL5A3;PTK2;ITGA3;KRAS;UBC;COL3A1
REACTOME_CONSTITUTIVE_SIGNALING_BY_ABERRANT_PI3K_IN_CANCER	0.107395	1	0.392834	1.28654	49	FGF16;PIK3CB;HGF;IRS2;SRC;PDGFRA;EREG;PDGFB;FYN;FGFR3;HBEGF;CD19;FGF7;MET;BTC
REACTOME_IRS_MEDIATED_SIGNALLING	0.132183	1	0.431706	1.28561	31	FGF16;PIK3CB;TRIB3;IRS2;FLT3LG;FGFR3;SOS1;FGF7;GAB2
REACTOME_TRANSCRIPTIONAL_REGULATION_OF_PLURIPOTENT_STEM_CELLS	0.161172	1	0.503869	1.28454	16	TDGF1;HIF3A;POU5F1;EPHA1;KLF4
REACTOME_INTERLEUKIN_7_SIGNALING	0.149326	1	0.470639	1.283	21	HGF;IRS2;IL7;TSLP
REACTOME_CHAPERONE_MEDIATED_AUTOPHAGY	0.170953	1	0.517967	1.27707	14	HDAC6;VIM;PLIN2;HSPA8;UBC;ARL13B;HSP90AA1;LAMP2
REACTOME_DAG_AND_IP3_SIGNALING	0.12928	1	0.41507	1.27684	36	PRKAR1B;ADCY1;ADCY8;ADCY7;ADCY6;KPNA2
REACTOME_ANTI_INFLAMMATORY_RESPONSE_FAVOURING_LEISHMANIA_PARASITE_INFECTION	0.0906534	1	0.358158	1.27496	78	DPEP1;RAMP3;PRKAR1B;ADCY1;ADORA2B;FCGR1A;GPR27;SRC;ADCY8;GPR39;ADCY7;FYN;ADCY6;DPEP2
REACTOME_ION_TRANSPORT_BY_P_TYPE_ATPASES	0.134678	1	0.419208	1.27353	34	ATP11C;FXYD3;ATP8B2;CUTC;ATP8B1;ATP11A;ATP2B1;ATP2A3;ATP13A1;ATP13A2
REACTOME_DOWNSTREAM_SIGNAL_TRANSDUCTION	0.149343	1	0.431571	1.26637	29	NCK2;PIK3CB;SRC;PDGFRA;PDGFB;SOS1;BCAR1
REACTOME_EPHA_MEDIATED_GROWTH_CONE_COLLAPSE	0.15843	1	0.450223	1.26596	24	NGEF;SRC;FYN;MYH14;EPHA1;EFNA1;YES1;EFNA4
REACTOME_SYNTHESIS_OF_PROSTAGLANDINS_PG_AND_THROMBOXANES_TX	0.189281	1	0.546135	1.26556	11	PTGS1;PTGS2;PTGIS
REACTOME_SHC1_EVENTS_IN_ERBB2_SIGNALING	0.169801	1	0.481238	1.26528	18	EREG;HBEGF;SOS1;BTC;KRAS;ERBB4;PTPN12;HRAS;PRKCE;PRKCA;EGF
REACTOME_DEFECTIVE_B4GALT7_CAUSES_EDS_PROGEROID_TYPE	0.178821	1	0.494945	1.26179	16	GPC4;GPC1;AGRN;BGN;SDC4;VCAN;B4GALT7
REACTOME_SYNTHESIS_OF_LEUKOTRIENES_LT_AND_EOXINS_EX	0.183566	1	0.511719	1.26167	14	DPEP1;ALOX15;DPEP2;LTC4S;PTGR1
REACTOME_INSULIN_RECEPTOR_SIGNALLING_CASCADE	0.14106	1	0.410059	1.26142	36	FGF16;PIK3CB;TRIB3;IRS2;FLT3LG;FGFR3;SOS1;FGF7;GAB2
REACTOME_FORMATION_OF_FIBRIN_CLOT_CLOTTING_CASCADE	0.168675	1	0.461042	1.25683	21	F5;KLKB1;F7;VWF;GP5;PF4;SERPINE2;SERPING1;F13A1;F2R;GP9;F3
REACTOME_APOPTOTIC_EXECUTION_PHASE	0.143986	1	0.400379	1.25217	39	DSP;PRKCQ;LMNB1;VIM;BMX;DFFA;DNM1L;PTK2;PLEC;MAPT
REACTOME_DEFECTIVE_EXT2_CAUSES_EXOSTOSES_2	0.198515	1	0.527677	1.2509	12	GPC4;GPC1;AGRN;SDC4;EXT1;EXT2
REACTOME_PHASE_I_FUNCTIONALIZATION_OF_COMPOUNDS	0.126127	1	0.369832	1.25027	58	FMO3;PTGS1;CYP26B1;ADH1C;CMBL;CYP1A1;CYP39A1;CYP2R1;PTGIS;PAOX;AOC2;FMO2;ACSS2;CYP2B6
REACTOME_ION_CHANNEL_TRANSPORT	0.0971775	1	0.333331	1.24189	104	CLCN6;TRPC6;SLC9B2;RIPK3;ATP11C;FXYD3;TRPC3;CASQ2;CLCN5;ATP6V0D2;ATP8B2;SCNN1A;CUTC;ANO10;NEDD4L;MCOLN1;ATP8B1;ATP11A;TPCN2
REACTOME_APOPTOTIC_CLEAVAGE_OF_CELLULAR_PROTEINS	0.165639	1	0.413643	1.23938	32	DSP;PRKCQ;LMNB1;VIM;BMX;PTK2;PLEC;MAPT
REACTOME_CHONDROITIN_SULFATE_DERMATAN_SULFATE_METABOLISM	0.156177	1	0.392974	1.23557	40	CHST11;CSGALNACT1;GPC4;GPC1;AGRN;CHST3;BGN;SDC4;VCAN;CHPF;B4GALT7;DSEL
REACTOME_EUKARYOTIC_TRANSLATION_ELONGATION	0.124845	1	0.348929	1.23422	75	EEF2;RPL10A;EEF1D;RPL22;EEF1A1;RPS20;RPL7A;RPL3;RPL39;RPL15;RPS12;RPS4Y1;RPS7;RPL28;RPS25;RPL6;RPL10;FAU;RPS2;RPL27A;RPL7;RPL11;RPL21;RPS17;RPL18A;RPS14;RPS15A;RPS27L;RPL17;RPS15;RPLP0;RPL18;RPL31;RPL23;RPS13;RPL30;RPL36AL;RPS24;RPS11;RPL24;RPL14;RPS10;RPL27;EEF1G;RPS27A;RPLP2;RPL12;RPS5;RPL26;RPL13A;RPSA;RPL5;EEF1B2;RPL8;RPS18;RPS9;RPL37A;RPS3;RPS8;RPL9;RPS6;RPS16;RPS23;RPL35A;RPS28;RPS26;RPS21;…
REACTOME_ERBB2_REGULATES_CELL_MOTILITY	0.218372	1	0.545823	1.23348	10	EREG;HBEGF;MEMO1;BTC;ERBB4
REACTOME_MISCELLANEOUS_TRANSPORT_AND_BINDING_EVENTS	0.190541	1	0.457462	1.23337	20	MRS2;NIPAL4;LRRC8B;NIPAL1;MMGT1;NIPA1;LRRC8C;NIPA2;ANKH;TUSC3;ADD3;LRRC8E
REACTOME_STIMULI_SENSING_CHANNELS	0.149455	1	0.37261	1.22887	51	CLCN6;TRPC6;SLC9B2;RIPK3;TRPC3;CASQ2;CLCN5;SCNN1A;ANO10;NEDD4L;MCOLN1;TPCN2
REACTOME_REGULATION_OF_INSULIN_LIKE_GROWTH_FACTOR_IGF_TRANSPORT_AND_UPTAKE_BY_INSULIN_LIKE_GROWTH_FACTOR_BINDING_PROTEINS_IGFBPS	0.132434	1	0.34535	1.22416	76	F5;PENK;MMP2;FN1;ITIH2;SCG3;APOA2;MSLN;SPP1;CHRDL1;LAMC1;MFGE8;IGFBP6;VCAN;MEN1;FAM20A;IGFBP2;FAM20C;WFS1;MGAT4A;FUCA2;C3;IGFBP7;TMEM132A;VWA1
REACTOME_G_PROTEIN_MEDIATED_EVENTS	0.162242	1	0.375933	1.22134	47	PRKAR1B;ADCY1;GNAL;ADCY8;GNAO1;ADCY7;PLA2G4A;ADCY6;KPNA2
REACTOME_SPRY_REGULATION_OF_FGF_SIGNALING	0.222391	1	0.493547	1.21686	14	SRC;PPP2CB;UBC;PPP2R1A;MKNK1;BRAF;SPRY2
REACTOME_LISTERIA_MONOCYTOGENES_ENTRY_INTO_HOST_CELLS	0.219882	1	0.476744	1.21539	16	STAM;SRC;MET;CBLL1;UBC
REACTOME_HEDGEHOG_OFF_STATE	0.121596	1	0.326028	1.21468	104	PRKAR1B;ADCY1;IFT140;SUFU;INTU;GLI1;WDR19;MKS1;ADCY8;ADCY7;ADCY6;IFT57;GLI3;TTC21B;IFT122;KIF3A;PSMD12;NUMB;ADCY5;UBC;PSMD3;PSMD8;KIF7;PSMD2;TUBB2B;PSME1;PSMD4;PSMD11;PRKACA;PSMC4;SMO;PSMA5;TUBA1A;TUBB3;PSMD10;PSME4;PSMC6;PSMD13;PSMD6
REACTOME_EGFR_DOWNREGULATION	0.206277	1	0.434387	1.21045	23	PTPN3;STAM;EREG;HBEGF;BTC;UBC;PTPN12
REACTOME_NEGATIVE_REGULATION_OF_MET_ACTIVITY	0.221311	1	0.466936	1.20894	17	HGF;STAM;PTPRJ;MET;UBC
REACTOME_FANCONI_ANEMIA_PATHWAY	0.206836	1	0.429599	1.20797	24	FANCD2;EME2;FAN1;RPA1;FANCC;ATR;FANCL;WDR48;UBC;SLX4;ERCC4
REACTOME_WNT_LIGAND_BIOGENESIS_AND_TRAFFICKING	0.234642	1	0.498901	1.20669	13	WNT6;WNT16;WNT9A;VPS26A;TMED5;WLS
REACTOME_BIOLOGICAL_OXIDATIONS	0.126737	1	0.318037	1.20228	115	FMO3;PTGS1;DPEP1;CYP26B1;ADH1C;PAPSS2;CMBL;CYP1A1;CYP39A1;CYP2R1;PTGIS;PAOX;AOC2;FMO2;DPEP2;N6AMT1;ACSS2;CYP2B6;GSTK1;AHCY;ALDH1A1;GSTO1;ABHD10;OPLAH;MGST3;POR;GCLC;GGCT;EPHX1;CYP27A1;GSTA3;CES1;MAOA;SLC26A2;MTR
REACTOME_KINESINS	0.191918	1	0.388558	1.20224	37	KIF16B;CENPE;KIF20B;KIF22;KIF9;KIF26B;KIF21A
REACTOME_CHONDROITIN_SULFATE_BIOSYNTHESIS	0.237005	1	0.477788	1.19829	15	CHST11;CSGALNACT1;CHST3;BGN;VCAN;CHPF
REACTOME_NITRIC_OXIDE_STIMULATES_GUANYLATE_CYCLASE	0.237436	1	0.469016	1.19569	16	PRKG2;PDE10A;NOS2;PDE5A;GUCY1A2;KCNMA1;KCNMB1;PDE9A
REACTOME_FATTY_ACYL_COA_BIOSYNTHESIS	0.221331	1	0.428547	1.19418	23	ELOVL4;ACSBG1;TECRL;SCD;ACSF3;ACSL4
REACTOME_REGULATION_OF_TNFR1_SIGNALING	0.217635	1	0.409024	1.19108	28	USP2;MADD;SPPL2A;SHARPIN;RNF31;TRAF1;UBC;USP4;CHUK;OTUD7B;CLIP3
REACTOME_RRNA_PROCESSING	0.116177	1	0.298253	1.18794	169	HEATR1;UTP20;MRM1;PNO1;RRP7A;PELP1;DDX21;NSUN4;NOB1;DHX37;MPHOSPH6;NOP2;RPP38;WDR75;RRP9;DIS3;UTP15;TSR3;NOP14;UTP14A;LTV1;WDR43;BYSL;KRR1;RIOK1;RIOK3;MPHOSPH10;RPP30;NOL12;RRP36;TBL3;DDX52;NCL;NOC4L;WDR36;DCAF13;NOL6;PDCD11
REACTOME_PRC2_METHYLATES_HISTONES_AND_DNA	0.255798	1	0.500981	1.18762	12	DNMT3B;MTF2;EZH2
REACTOME_ACTIVATION_OF_NMDA_RECEPTORS_AND_POSTSYNAPTIC_EVENTS	0.185175	1	0.343276	1.18057	64	PPM1F;PRKAR1B;ADCY1;SRC;GRIA3;ADCY8;KPNA2;PRKAA2;KRAS;CASK;MAPT;TUBB2B;ERBB4;PPM1E;HRAS;PRKACA;TUBA1A;TUBB3
REACTOME_GAB1_SIGNALOSOME	0.258937	1	0.477786	1.178	14	SRC;EREG;HBEGF;BTC;PXN;PIK3CA
REACTOME_GLUCAGON_LIKE_PEPTIDE_1_GLP1_REGULATES_INSULIN_SECRETION	0.226919	1	0.392133	1.17493	32	PRKAR1B;KCNS3;ADCY8;ADCY6;RAPGEF4;GNG7;ADCY5;GNB4;ITPR2;IQGAP1;PRKACA
REACTOME_SIGNALING_BY_TYPE_1_INSULIN_LIKE_GROWTH_FACTOR_1_RECEPTOR_IGF1R	0.22978	1	0.379559	1.1676	36	FGF16;PIK3CB;TRIB3;IRS2;FLT3LG;FGFR3;SOS1;FGF7;GAB2
REACTOME_MECP2_REGULATES_NEURONAL_RECEPTORS_AND_CHANNELS	0.272615	1	0.482667	1.16743	13	FKBP5;TRPC3;MET
REACTOME_FORMATION_OF_TUBULIN_FOLDING_INTERMEDIATES_BY_CCT_TRIC	0.262253	1	0.436334	1.16225	19	CCT6B;CCT3;TCP1;CCT5;TUBB2B;TUBA1A;TUBB3;CCT7;TUBB4B;CCT4
REACTOME_TNF_SIGNALING	0.236288	1	0.374934	1.16009	37	TAB3;USP2;MADD;TAB1;SPPL2A;SHARPIN;RNF31;TRAF1;FADD;UBC;USP4;CHUK;OTUD7B
REACTOME_CELL_CELL_JUNCTION_ORGANIZATION	0.245578	1	0.388789	1.1578	31	CLDN7;CLDN11;CLDN3;CDH6;JUP;CLDN18;PARD6B
REACTOME_CONSTITUTIVE_SIGNALING_BY_LIGAND_RESPONSIVE_EGFR_CANCER_VARIANTS	0.274305	1	0.446139	1.15509	17	SOS1;KRAS;UBC;HSP90AA1;HRAS;PIK3CA;CDC37;PLCG1;EGF
REACTOME_CELL_JUNCTION_ORGANIZATION	0.223157	1	0.343512	1.15372	56	LAMA3;CLDN7;CLDN11;ITGB4;FLNC;KRT5;CLDN3;CDH6;JUP;CLDN18;PARD6B;LIMS2;PLEC;ACTN1;FBLIM1;PXN;LAMC2;FERMT2;ACTG1;FLNA;F11R
REACTOME_CELL_SURFACE_INTERACTIONS_AT_THE_VASCULAR_WALL	0.198613	1	0.31103	1.1484	98	SELP;SLC7A7;PIK3CB;SRC;CXADR;FN1;JAM2;FYN;ITGA5;VPREB1;SLC16A1;GPC1;SLC16A3;SOS1;CD44;YES1;SDC4;COL1A2;COL1A1;PF4;TEK;ITGA3;KRAS;SLC7A10
REACTOME_SIGNALING_BY_VEGF	0.196013	1	0.309041	1.14797	102	NCK2;PIK3CB;TRIB3;PAK1;SHC2;SRC;FYN;BAIAP2;WASF1;SPHK1;HSPB1;PGF;VEGFC;FLT4;BCAR1;JUP;VEGFB
REACTOME_SIGNALING_BY_HEDGEHOG	0.181677	1	0.296017	1.14461	135	PRKAR1B;EFCAB7;ADCY1;IFT140;SUFU;SCUBE2;INTU;GLI1;WDR19;MKS1;PTCH2;ADCY8;EVC2;ADCY7;DISP2;ADCY6;IFT57;GLI3;TTC21B
REACTOME_COOPERATION_OF_PDCL_PHLP1_AND_TRIC_CCT_IN_G_PROTEIN_BETA_FOLDING	0.262176	1	0.377998	1.14103	33	RGS9;CCT6B;CSNK2A2;GNAO1;RGS11;CCT3;TCP1;GNAI1;CCT5;GNG7
REACTOME_AMINO_ACID_TRANSPORT_ACROSS_THE_PLASMA_MEMBRANE	0.286494	1	0.411037	1.1331	22	SLC1A4;SLC36A2;SLC7A7;SLC36A4;SLC7A1;SLC43A2;SLC7A10;SLC1A5;SLC6A6
REACTOME_SPHINGOLIPID_DE_NOVO_BIOSYNTHESIS	0.273993	1	0.380388	1.13279	31	PPM1L;SPTLC1;SPHK1;ORMDL1;SPTLC2;SGMS2;CSNK1G2;PRKD2;ACER2;SGPL1
REACTOME_INTRAFLAGELLAR_TRANSPORT	0.260694	1	0.346058	1.12882	48	IFT140;WDR19;TTC26;TTC30B;IFT57;TTC21B;DYNC2LI1;KIF3B;IFT122;KIF3A;TUBB2B;KIFAP3;CLUAP1;TUBA1A;TUBB3;TCTEX1D2;TUBB4B;TRIP11;TRAF3IP1
REACTOME_NICOTINAMIDE_SALVAGING	0.312952	1	0.466453	1.12821	13	PTGS2;RNLS;PTGIS;PARP4;PARP16;PARP9;NAMPT;PARP6
REACTOME_ANCHORING_OF_THE_BASAL_BODY_TO_THE_PLASMA_MEMBRANE	0.23765	1	0.312177	1.1249	84	FBF1;HAUS6;PLK4;MKS1;CDK5RAP2;CENPJ;CEP152;HAUS3;TMEM67;HAUS8;NINL;IQCB1;SFI1;RAB3IP;CEP57;CEP41;DYNC1H1;NDE1;MARK4;TCTN3;ODF2;CEP78;PPP2R1A;YWHAG;HSP90AA1;NPHP1;PRKACA
REACTOME_COOPERATION_OF_PREFOLDIN_AND_TRIC_CCT_IN_ACTIN_AND_TUBULIN_FOLDING	0.292051	1	0.396056	1.12415	25	CCT6B;CCT3;TCP1;CCT5;TUBB2B;TUBA1A;TUBB3;PFDN1;CCT7;TUBB4B;CCT4
REACTOME_GLYCOGEN_BREAKDOWN_GLYCOGENOLYSIS	0.318616	1	0.464447	1.12336	13	PGM2L1;GAA;PYGM;PHKA2;PGM2
REACTOME_SYNTHESIS_OF_BILE_ACIDS_AND_BILE_SALTS	0.300861	1	0.416494	1.12291	20	CH25H;CYP39A1;PTGIS;HSD3B7;OSBPL7;CYP27A1;OSBPL1A;ACOT8;OSBPL3;OSBPL9;HSD17B4
REACTOME_INTEGRIN_SIGNALING	0.297153	1	0.398724	1.12115	24	SRC;FN1;ITGA2B;SOS1;BCAR1;RAPGEF4;VWF;PTK2
REACTOME_CILIUM_ASSEMBLY	0.208704	1	0.28034	1.1174	170	FBF1;IFT140;BBS7;HAUS6;PLK4;WDR19;MKS1;CDK5RAP2;CYS1;HDAC6;CENPJ;TTC26;CEP152;HAUS3;TMEM67;HAUS8;NINL;TTC30B;IFT57;IQCB1;CCT3;ARL6;SFI1;TTC21B;RAB3IP;DYNC2LI1;TCP1;CCT5;CEP57;PKD2;EXOC7;KIF3B;IFT122;KIF3A;CEP41;DYNC1H1;NDE1;MARK4;TCTN3;TUBB2B;BBS4;ODF2;KIFAP3;CEP78;PPP2R1A;ARL13B;YWHAG;HSP90AA1
REACTOME_SIGNALING_BY_PDGFR_IN_DISEASE	0.319061	1	0.416895	1.11047	19	PIK3CB;PDGFRA;SOS1;WDR48;KRAS;KANK1;HRAS;PIK3CA;STAT3
REACTOME_HEPARAN_SULFATE_HEPARIN_HS_GAG_METABOLISM	0.290916	1	0.348977	1.10935	42	HS6ST2;GPC4;HS3ST1;HS3ST6;GPC1;AGRN;BGN;GLB1L;SDC4;VCAN;B4GALT7;EXT1;HS6ST1;GLCE
REACTOME_SIGNALING_BY_FGFR	0.274909	1	0.321009	1.1069	65	FGF16;SRC;GTF2F1;GTF2F2;FGFR3;FRS3;SPRED2;FLRT3;SOS1;PPP2CB;FGF7;NCBP1;KRAS;UBC;FLRT1;NCBP2;PPP2R1A;FGFR2;HRAS;MKNK1;PTBP1;FGFR1;PIK3CA;BRAF
REACTOME_DISEASES_ASSOCIATED_WITH_GLYCOSAMINOGLYCAN_METABOLISM	0.305925	1	0.366001	1.10481	33	PAPSS2;GPC4;GPC1;AGRN;CHST3;BGN;SDC4;VCAN;B4GALT7;EXT1
REACTOME_COPI_DEPENDENT_GOLGI_TO_ER_RETROGRADE_TRAFFIC	0.273378	1	0.311939	1.10338	75	KIF16B;CENPE;KIF20B;KIF22;KIF9;KIF26B;KIF21A;ARF3;KDELR3;BNIP1;NAPB;KIF3B;KIF3A;COPB2
REACTOME_MUSCLE_CONTRACTION	0.259693	1	0.287118	1.09638	123	KCNK6;TNNT3;MYL6B;TNNI3;CACNA2D3;PAK1;FXYD3;TNNC1;HIPK2;CASQ2;TMOD1;SCN3A;CACNG4;VIM;KCNK1;MYL1;ANXA1;SCN3B;ATP2B1;NPR1;CORIN;CASQ1;ACTC1;ATP2A3;TMOD3;TMOD2
REACTOME_SIGNALING_BY_INSULIN_RECEPTOR	0.30025	1	0.325778	1.09416	56	FGF16;PIK3CB;TRIB3;IRS2;ATP6V0D2;FLT3LG;FGFR3;SOS1;FGF7;GAB2
REACTOME_RECRUITMENT_OF_MITOTIC_CENTROSOME_PROTEINS_AND_COMPLEXES	0.299429	1	0.309624	1.08722	72	TUBGCP6;HAUS6;PLK4;CDK5RAP2;CENPJ;CEP152;TUBGCP2;HAUS3;HAUS8;NINL;TUBG2;SFI1
REACTOME_PI3K_EVENTS_IN_ERBB2_SIGNALING	0.367997	1	0.457267	1.08399	12	EREG;HBEGF;BTC;ERBB4;PIK3CA;EGF
REACTOME_DISASSEMBLY_OF_THE_DESTRUCTION_COMPLEX_AND_RECRUITMENT_OF_AXIN_TO_THE_MEMBRANE	0.34174	1	0.381377	1.08248	25	FRAT2;DVL3;DVL2;PPP2CB;PPP2R5D;DVL1;CSNK1G2;AXIN1;PPP2R1A;PPP2R5B
REACTOME_INTEGRATION_OF_ENERGY_METABOLISM	0.303044	1	0.301544	1.08203	82	PRKAR1B;ADCY1;KCNS3;CACNA1E;ADCY8;CACNA1A;ADCY7;SYT5;ADCY6;STX1A;PPP2CB;PPP2R5D;GNAI1;ACSL4;RAPGEF4;PRKAA2;GNG7
REACTOME_HS_GAG_DEGRADATION	0.34957	1	0.401252	1.08182	20	GPC4;GPC1;AGRN;GLB1L;SDC4
REACTOME_CONSTITUTIVE_SIGNALING_BY_EGFRVIII	0.369616	1	0.428337	1.07427	15	SOS1;KRAS;HSP90AA1;HRAS;PIK3CA;CDC37;PLCG1;EGF
REACTOME_REGULATION_OF_FZD_BY_UBIQUITINATION	0.374425	1	0.434954	1.0724	14	RNF43;FZD8;UBC;RSPO3;FZD4;FZD6;LGR6
REACTOME_SIGNALING_BY_RETINOIC_ACID	0.35271	1	0.362731	1.07233	30	RARB;CYP26B1;ADH1C;ALDH1A3;PPARD;ALDH1A1;PDHX;PDHA1;RXRB;RDH5;DHRS3;ALDH1A2;FABP5;RDH11;DLAT
REACTOME_RIPK1_MEDIATED_REGULATED_NECROSIS	0.370294	1	0.413027	1.06936	17	RIPK3;FADD;CFLAR;UBC;MLKL
REACTOME_INTRINSIC_PATHWAY_OF_FIBRIN_CLOT_FORMATION	0.386016	1	0.450449	1.06783	12	KLKB1;VWF;GP5;SERPINE2;SERPING1;GP9
REACTOME_ACYL_CHAIN_REMODELLING_OF_PE	0.388135	1	0.449658	1.06595	12	MBOAT2;PLA2G1B;PLA2G4A
REACTOME_PLATELET_SENSITIZATION_BY_LDL	0.379261	1	0.425009	1.06592	15	LRP8;PLA2G4A;PPP2CB;PPP2R5D
REACTOME_OPIOID_SIGNALLING	0.335354	1	0.302236	1.06415	73	PRKAR1B;ADCY1;PPP1R1B;GNAL;ADCY8;GNAO1;ADCY7;PLA2G4A;ADCY6;KPNA2;PPP2CB;PPP2R5D
REACTOME_PURINE_RIBONUCLEOSIDE_MONOPHOSPHATE_BIOSYNTHESIS	0.395335	1	0.470858	1.06407	10	PPAT;IMPDH1;GART;ADSL;PAICS
REACTOME_GLYCOGEN_METABOLISM	0.372514	1	0.385318	1.0622	22	PGM2L1;GAA;PGM1;GBE1;UBC;PYGM;PHKA2;PGM2;NHLRC1
REACTOME_METABOLISM_OF_WATER_SOLUBLE_VITAMINS_AND_COFACTORS	0.333411	1	0.291291	1.0617	90	NT5E;PTGS2;SLC19A2;SLC25A32;MOCS3;PPCS;RNLS;PTGIS;CD38;AASDHPPT;PARP4;PCCB;GPHN;FLAD1;PARP16;MTHFR;NADK2;PARP9;ENPP1;NAMPT;GSTO1;MMAA;MTHFS;PARP6;PANK1;MOCOS;MTR;MMADHC;THTPA;TCN2;COASY;LMBRD1;MTHFD1;PANK4
REACTOME_GOLGI_TO_ER_RETROGRADE_TRANSPORT	0.333541	1	0.283832	1.05905	105	KIF16B;CENPE;KIF20B;KIF22;PLA2G4A;KIF9;KIF26B;KIF21A;ARF3;ACTR10;KDELR3;BNIP1;NAPB;AGPAT3;KIF3B;KIF3A;COPB2;BICD2;DYNC1H1;KIF1A;TUBB2B;PAFAH1B2;KIFAP3;RAB6B;TUBA1A;TUBB3;KDELR1;KIF1C;DCTN5;DYNC1LI1;GBF1;ARCN1;KIF13B;TUBB4B;PAFAH1B1;NSF;KIF1B
REACTOME_METABOLISM_OF_PORPHYRINS	0.381383	1	0.392311	1.05771	20	COX15;HMOX1;FABP1;CPOX;UROS;FLVCR1
REACTOME_SIGNALING_BY_EGFR	0.363742	1	0.334295	1.05749	41	PTPN3;STAM;SRC;EREG;HBEGF;SOS1;BTC;KRAS;UBC;PTPN12;HRAS;PXN
REACTOME_ELEVATION_OF_CYTOSOLIC_CA2_LEVELS	0.392186	1	0.428827	1.05729	14	TRPC6;TRPC3;P2RX6;P2RX4
REACTOME_PEPTIDE_LIGAND_BINDING_RECEPTORS	0.353736	1	0.304447	1.05576	67	PENK;QRFP;KEL;ACKR3;CCL11;CCR1;CCR6;F2RL2;EDN1;CCL25;CXCL13;C5AR1;CXCR6;NPY1R;EDN3;ANXA1;ACKR4;APLNR;C5AR2;NMB;FPR2;CX3CR1;APLN;PF4;GAL;C3;ACKR2;GRP
REACTOME_RECEPTOR_MEDIATED_MITOPHAGY	0.403745	1	0.455053	1.05449	11	SRC;CSNK2A2
REACTOME_GLYCOGEN_SYNTHESIS	0.402508	1	0.44451	1.05375	12	PGM2L1;PGM1;GBE1;UBC;PGM2;NHLRC1
REACTOME_A_TETRASACCHARIDE_LINKER_SEQUENCE_IS_REQUIRED_FOR_GAG_SYNTHESIS	0.391987	1	0.389397	1.04986	20	GPC4;GPC1;AGRN;BGN;SDC4;VCAN;B4GALT7
REACTOME_REGULATION_OF_GLYCOLYSIS_BY_FRUCTOSE_2_6_BISPHOSPHATE_METABOLISM	0.415705	1	0.463003	1.04632	10	PPP2CB;PPP2R5D;PPP2R1A;PRKACA;PFKFB3;PFKFB4;PRKACB
REACTOME_DEPOLYMERISATION_OF_THE_NUCLEAR_LAMINA	0.40365	1	0.417001	1.04583	15	LPIN3;LMNB1;LEMD2;LPIN1
REACTOME_PLATELET_HOMEOSTASIS	0.373182	1	0.302796	1.04409	65	TRPC6;LRP8;PRKG2;PDE10A;NOS2;TRPC3;PLA2G4A;PPP2CB;PPP2R5D;ATP2B1;P2RX6;GNG7;ATP2A3;P2RX4;PTGIR;PDE5A;GNB4;GUCY1A2;PPP2R1A;KCNMA1;ITPR2;KCNMB1;PPP2R5B
REACTOME_RECRUITMENT_OF_NUMA_TO_MITOTIC_CENTROSOMES	0.377461	1	0.291361	1.03952	79	TUBGCP6;HAUS6;PLK4;CDK5RAP2;CENPJ;CEP152;TUBGCP2;HAUS3;HAUS8;NINL;TUBG2;SFI1
REACTOME_ERYTHROPOIETIN_ACTIVATES_PHOSPHOINOSITIDE_3_KINASE_PI3K	0.432852	1	0.456646	1.03195	10	PIK3CB;IRS2
REACTOME_SPHINGOLIPID_METABOLISM	0.398322	1	0.299506	1.03004	64	GLA;PPM1L;GBA2;B3GALNT1;SPTLC1;SPHK1;ORMDL1;SPTLC2;GLB1L;ARSK;NEU3;SGMS2;ASAH1;CSNK1G2;PRKD2;ACER2;SGPL1;CERK;UGCG;ESYT2;SMPD4
REACTOME_HEME_BIOSYNTHESIS	0.428051	1	0.425761	1.02979	13	COX15;CPOX;UROS;FLVCR1
REACTOME_ACTIVATION_OF_MATRIX_METALLOPROTEINASES	0.422798	1	0.403783	1.02939	16	MMP3;KLKB1;MMP2;CMA1
REACTOME_TRAF6_MEDIATED_INDUCTION_OF_TAK1_COMPLEX_WITHIN_TLR4_COMPLEX	0.430549	1	0.424904	1.02772	13	TAB3;TLR4;TAB1;CD14;UBC
REACTOME_ACTIVATED_NTRK2_SIGNALS_THROUGH_FRS2_AND_FRS3	0.439776	1	0.454023	1.02602	10	FRS3;BDNF;SOS1;KRAS;HRAS;NTRK2
REACTOME_JNK_C_JUN_KINASES_PHOSPHORYLATION_AND_ACTIVATION_MEDIATED_BY_ACTIVATED_HUMAN_TAK1	0.426708	1	0.396051	1.02541	17	TAB3;MAP2K4;TAB1;UBC;TRAF6;MAPK9;UBE2V1
REACTOME_GABA_RECEPTOR_ACTIVATION	0.416667	1	0.342218	1.02537	32	ADCY1;GNAL;ADCY8;ADCY7;ADCY6;ARHGEF9;GNAI1;GABRQ;GNG7
REACTOME_SIGNALING_BY_FGFR3	0.421157	1	0.343495	1.02292	31	FGF16;SRC;FGFR3;FRS3;SOS1;PPP2CB;KRAS;UBC;PPP2R1A;HRAS;MKNK1;PIK3CA;BRAF
REACTOME_CLASS_B_2_SECRETIN_FAMILY_RECEPTORS	0.422538	1	0.330233	1.02178	37	RAMP3;WNT6;WNT16;PTCH2;WNT9A;FZD8;GNG7;GNB4;FZD4;FZD6;CALCRL
REACTOME_SIGNALING_BY_FGFR2	0.414794	1	0.303792	1.02032	56	FGF16;SRC;GTF2F1;GTF2F2;FRS3;SOS1;PPP2CB;FGF7;NCBP1;KRAS;UBC;NCBP2;PPP2R1A;FGFR2;HRAS;MKNK1;PTBP1;PIK3CA;BRAF;HNRNPM;POLR2B;SPRY2;PLCG1;POLR2F
REACTOME_TNFS_BIND_THEIR_PHYSIOLOGICAL_RECEPTORS	0.440926	1	0.412812	1.01781	14	TNFRSF11B;LTA;TNFRSF25;TNFSF13B;TNFRSF9
REACTOME_REGULATION_OF_RUNX3_EXPRESSION_AND_ACTIVITY	0.423202	1	0.308373	1.01702	51	SRC;PSMD12;UBC;PSMD3;PSMD8;PSMD2;PSME1;PSMD4;PSMD11;PSMC4;PSMA5;RUNX3;PSMD10;SMURF2;PSMC6;PSMD13;PSMD6;EP300
REACTOME_MITOCHONDRIAL_FATTY_ACID_BETA_OXIDATION	0.432721	1	0.342997	1.01399	30	ACAD10;MECR;ACBD7;ACSF2;PCCB;ACBD6;MMAA
REACTOME_METABOLISM_OF_NITRIC_OXIDE_ENOS_ACTIVATION_AND_REGULATION	0.450289	1	0.418419	1.01203	13	DDAH1;DDAH2;HSP90AA1;AKT1
REACTOME_INTERLEUKIN_RECEPTOR_SHC_SIGNALING	0.441492	1	0.367099	1.01198	22	PIK3CB;CSF2RA;IL3RA;SOS1;GAB2;IL2;INPPL1;IL2RB;IL5RA;JAK3;PIK3CA
REACTOME_FLT3_SIGNALING	0.427419	1	0.248273	1.01	202	FGF16;PIK3CB;HGF;TRIB3;SPRED3;SHC2;IRS2;SRC;PDGFRA;FN1;EREG;CSF2RA;PDGFB;FYN;FLT3LG;FGFR3;FRS3;SPRED2;IL3RA;PAQR3;HBEGF;RASA2;ITGA2B;SOS1;PPP2CB;PPP2R5D;FGF7;DUSP10;GAB2;MET;BTC;DUSP2;NCAM1;VWF;PTK2;PSMD12;TEK;DUSP6;KRAS;UBC;PSMD3;PSMD8;PSMD2;ERBB4;PPP2R1A;FGFR2;IL2;PSME1;IQGAP1;IL2RB;HRAS;PSMD4;PSMD11;PPP2R5B;PSMC4;PSMA5;FGFR1;IL5RA;JAK3;ACTG1;PSMD10;PIK3CA;BRAF;PSME4;ANGPT1;PSMC6;MAP3K11;PSMD13…
REACTOME_GASTRIN_CREB_SIGNALLING_PATHWAY_VIA_PKC_AND_MAPK	0.456029	1	0.393852	1.00407	16	MMP3;HBEGF;SOS1;KRAS;HRAS
REACTOME_SEALING_OF_THE_NUCLEAR_ENVELOPE_NE_BY_ESCRT_III	0.453298	1	0.360099	1.00344	23	CC2D1B;LEMD2;CHMP4C;VPS4A;TUBB2B;TUBA1A;TUBB3;CHMP3;TUBB4B;SPAST;IST1;CHMP2A;TUBB6;CHMP6
REACTOME_GLYCOSAMINOGLYCAN_METABOLISM	0.443516	1	0.273159	1.00302	94	CHST11;PAPSS2;CSGALNACT1;HS6ST2;GPC4;HS3ST1;HS3ST6;B3GNT4;GPC1;AGRN;GALNS;CHST3;CD44;BGN;GLB1L;SDC4;VCAN;CHPF;LYVE1;B4GALT7;EXT1;HS6ST1;DSEL;GLCE
REACTOME_RHO_GTPASES_ACTIVATE_PKNS	0.450816	1	0.33907	1.00238	30	PAK1;MYH14;KDM4C;AR;KDM1A;PKN3;PPP1R12A;YWHAG
REACTOME_EPH_EPHRIN_SIGNALING	0.45104	1	0.28172	1.00065	77	NCK2;NGEF;PAK1;MMP2;SRC;FYN;MYH14;EPHA1;EFNA1;NCSTN;YES1;EFNA4;EPHB4;PTK2;PAK3
REACTOME_RUNX2_REGULATES_OSTEOBLAST_DIFFERENTIATION	0.460078	1	0.371112	1.00056	20	SRC;HDAC6;ZNF521;GLI3;YES1;COL1A1;AR
REACTOME_TICAM1_RIP1_MEDIATED_IKK_COMPLEX_RECRUITMENT	0.459896	1	0.386308	1.00019	17	RIPK3;UBC;CHUK;TRAF6;UBE2V1;TICAM1;UBE2D3
REACTOME_PHASE_0_RAPID_DEPOLARISATION	0.458557	1	0.36689	1.00017	21	CACNA2D3;SCN3A;CACNG4;SCN3B;CACNA2D1;CACNB2;CACNB1;CACNA1D
REACTOME_ENOS_ACTIVATION	0.471056	1	0.44247	0.999916	10	DDAH1;DDAH2;HSP90AA1;AKT1
REACTOME_FCERI_MEDIATED_NF_KB_ACTIVATION	0.45457	1	0.283202	0.99944	74	CARD11;PRKCQ;TAB3;FBXW11;TAB1;PSMD12;UBC;PSMD3;PSMD8;PSMD2;CHUK;PSME1;PSMD4;PSMD11;TRAF6;PSMC4;PSMA5;PSMD10;PSME4;UBE2V1;PSMC6;PSMD13;PSMD6
REACTOME_SIGNALING_BY_ROBO_RECEPTORS	0.453968	1	0.248565	0.998911	182	NCK2;ARHGAP39;ROBO1;PAK1;SRC;GPC1;PAK6;FLRT3;SOS1;USP33;ENAH;MAGOHB;COL4A5;CAP1;ABL2;SLIT2;NCBP1;PAK3;ETF1;PSMD12;ZSWIM8;UBC;PSMD3;SRGAP3;PSMD8;PSMD2;CASC3;NCBP2;CAP2;GSPT1;PSME1;MYO9B;PSMD4;PSMD11;PRKACA;PSMC4;PSMA5;PSMD10;RPL10A;PSME4;PSMC6;PSMD13;PSMD6;NTN1
REACTOME_CELL_EXTRACELLULAR_MATRIX_INTERACTIONS	0.461379	1	0.379731	0.99839	18	FLNC;LIMS2;ACTN1;FBLIM1;PXN;FERMT2;ACTG1;FLNA
REACTOME_TRANSLESION_SYNTHESIS_BY_Y_FAMILY_DNA_POLYMERASES_BYPASSES_LESIONS_ON_DNA_TEMPLATE	0.460578	1	0.334693	0.996709	31	RFC4;POLI;POLE;NPLOC4;REV1;POLK;RPA1
REACTOME_NEURONAL_SYSTEM	0.465959	1	0.244115	0.994958	206	PPM1F;KCNK6;KCNN4;PRKAR1B;ADCY1;CACNA2D3;KCNS3;SLITRK6;SRC;GNAL;CACNA1E;LRFN4;GRIA3;SLC6A4;ADCY8;SYN3;CACNA1A;ADCY7;PPFIBP1;CACNG4;ADCY6;KPNA2;NAAA;KCNK1;STX1A;NLGN2;SHANK1;GLUL;ARHGEF9;PDLIM5;HSPA8;GNAI1;GABRQ;PRKAA2;GNG7;SHARPIN
REACTOME_ENDOSOMAL_SORTING_COMPLEX_REQUIRED_FOR_TRANSPORT_ESCRT	0.465363	1	0.343709	0.993302	27	STAM;VTA1;CHMP4C;VPS4A;UBC;MVB12B
REACTOME_CONSTITUTIVE_SIGNALING_BY_OVEREXPRESSED_ERBB2	0.480822	1	0.439128	0.992363	10	SOS1;KRAS;PTPN12;HSP90AA1;HRAS;CDC37
REACTOME_REGULATION_OF_INSULIN_SECRETION	0.465175	1	0.294396	0.991952	57	PRKAR1B;KCNS3;CACNA1E;ADCY8;CACNA1A;SYT5;ADCY6;STX1A;GNAI1;ACSL4;RAPGEF4;GNG7
REACTOME_EARLY_PHASE_OF_HIV_LIFE_CYCLE	0.477562	1	0.409614	0.990735	13	LIG4;HMGA1;XRCC4
REACTOME_DNA_DAMAGE_BYPASS	0.471852	1	0.318268	0.990734	38	RFC4;POLI;POLE;NPLOC4;RAD18;REV1;POLK;RPA1;DDB1;WDR48;UBC;RFC5
REACTOME_RESPONSE_OF_EIF2AK1_HRI_TO_HEME_DEFICIENCY	0.47509	1	0.39473	0.989977	15	TRIB3;EIF2S2;ASNS;DDIT3;ATF5;CEBPG;EIF2AK1
REACTOME_PYRUVATE_METABOLISM	0.475515	1	0.344355	0.986804	26	SLC16A1;ME1;SLC16A3;PPARD;PDPR;PDHX;LDHA;PDHA1;MPC1;GSTZ1;DLAT;VDAC1;BSG;HAGH
REACTOME_INITIATION_OF_NUCLEAR_ENVELOPE_NE_REFORMATION	0.479278	1	0.370249	0.986218	19	LMNB1;VRK2;ANKLE2;LEMD2;PPP2R1A;EMD;LMNA;SIRT2;LBR;PPP2R2A
REACTOME_RHO_GTPASES_ACTIVATE_CIT	0.480987	1	0.380127	0.984182	17	PRC1;MYH14;PPP1R12A
REACTOME_GAP_FILLING_DNA_REPAIR_SYNTHESIS_AND_LIGATION_IN_GG_NER	0.482525	1	0.356965	0.984042	22	RFC4;POLE;XRCC1;POLK;RPA1;UBC;RFC5
REACTOME_TERMINATION_OF_TRANSLESION_DNA_SYNTHESIS	0.480272	1	0.343242	0.983614	26	RFC4;POLI;POLE;REV1;POLK;RPA1
REACTOME_TRANSCRIPTIONAL_REGULATION_BY_MECP2	0.482792	1	0.303619	0.982683	46	FKBP5;DLL1;TRPC3;HIPK2;BDNF;MET
REACTOME_SUMOYLATION_OF_DNA_METHYLATION_PROTEINS	0.492467	1	0.389491	0.976839	15	DNMT3B;PHC1;PCGF2
REACTOME_LATE_ENDOSOMAL_MICROAUTOPHAGY	0.492738	1	0.34362	0.975315	25	HDAC6;VIM;PLIN2;HSPA8;CHMP4C;UBC;MVB12B;ARL13B
REACTOME_INTERLEUKIN_15_SIGNALING	0.496695	1	0.395208	0.974403	14	SOS1;IL15RA;GAB2;IL2RB;JAK3;STAT3
REACTOME_CARGO_RECOGNITION_FOR_CLATHRIN_MEDIATED_ENDOCYTOSIS	0.505262	1	0.272626	0.974237	80	STAM;EREG;COPS7B;DVL2;NECAP1;HBEGF;FCHO1;CHRM2;REPS1;EPN2;VAMP7;BTC;ITSN2;PICALM;UBC;TOR1A;AP2A1;FZD4;IGF2R;LDLR;SCARB2;DAB2;STON1
REACTOME_EUKARYOTIC_TRANSLATION_INITIATION	0.508392	1	0.262619	0.973912	101	EIF2S2;EIF2B2;EIF1AX;EIF3C;EIF3D;EIF3A;EIF4B;EIF3L;RPL10A;EIF4A1;EIF4A2;EIF3I;EIF5;RPL22;EIF3E;EIF4EBP1;EIF2B3;EIF3M;EIF4H;RPS20;RPL7A;RPL3;RPL39;RPL15;EIF3B;RPS12;RPS4Y1;RPS7;EIF4G1;RPL28;EIF3K;RPS25;RPL6;RPL10;FAU;EIF2B5;RPS2;RPL27A;RPL7;RPL11;EIF3H;RPL21;RPS17;RPL18A;RPS14;RPS15A;EIF2S3;RPS27L;RPL17;RPS15;EIF3F;RPLP0;RPL18;EIF2B4;RPL31;RPL23;RPS13;EIF5B;RPL30;RPL36AL;RPS24;RPS11;RPL24;RPL14;RP…
REACTOME_REGULATION_OF_GENE_EXPRESSION_BY_HYPOXIA_INDUCIBLE_FACTOR	0.505236	1	0.430592	0.973073	10	HIF3A;CITED2
REACTOME_ASSOCIATION_OF_TRIC_CCT_WITH_TARGET_PROTEINS_DURING_BIOSYNTHESIS	0.501561	1	0.314088	0.971826	37	FBXW9;CCT6B;SPHK1;CCT3;TCP1;CCT5;FBXL5;LONP2;ARFGEF2;SKIV2L;FKBP9;KIF13A;CCT7;FBXO6;STAT3;XRN2
REACTOME_RUNX1_INTERACTS_WITH_CO_FACTORS_WHOSE_PRECISE_EFFECT_ON_RUNX1_TARGETS_IS_NOT_KNOWN	0.504465	1	0.319092	0.969383	34	CSNK2A2;HIPK2;RYBP;PHC1;SMARCD2;ARID1B;SMARCD3
REACTOME_ATTENUATION_PHASE	0.505743	1	0.351599	0.969248	22	HSPB1;CRYBA4;HSPA8;COL4A6;HSPA1L;HSP90AA1;HSPH1;HSPA2;HSP90AB1;EP300;HSPB2;DEDD2
REACTOME_PROCESSING_OF_SMDT1	0.505357	1	0.392559	0.967873	14	MICU3;MCU;MICU2;SPG7;PHB2;STOML2;PMPCB
REACTOME_INTRACELLULAR_SIGNALING_BY_SECOND_MESSENGERS	0.547341	1	0.231234	0.967363	261	PRKAR1B;FGF16;PIK3CB;ADCY1;HGF;TRIB3;IL1RL1;IRS2;SRC;CSNK2A2;PDGFRA;ADCY8;OTUD3;EREG;PDGFB;ADCY7;FYN;USP13;FGFR3;HBEGF;ADCY6;IER3;KPNA2;PIP5K1A;PHC1;RPTOR;PPP2CB;CD19;PPP2R5D;FGF7;SLC38A9;EZH2;PHLPP2;MET;EGR1;BTC;IL33;RRAGA
REACTOME_REGULATION_OF_BETA_CELL_DEVELOPMENT	0.508651	1	0.38486	0.965224	15	FOXA2;KAT2A;MAML1;AKT1;EP300
REACTOME_METALLOPROTEASE_DUBS	0.510732	1	0.390893	0.963765	14	STAM;STAMBPL1;BARD1;UBC;MYSM1
REACTOME_INSERTION_OF_TAIL_ANCHORED_PROTEINS_INTO_THE_ENDOPLASMIC_RETICULUM_MEMBRANE	0.514779	1	0.371123	0.96087	17	HMOX1;STX1A;BAG6;UBE2J2;PRNP
REACTOME_REGULATION_OF_TP53_ACTIVITY_THROUGH_ASSOCIATION_WITH_CO_FACTORS	0.522859	1	0.424752	0.959876	10	PPP1R13L;TP53BP2;ZNF385A;BANP;AKT1;AKT2;PPP1R13B
REACTOME_CGMP_EFFECTS	0.520264	1	0.396572	0.959191	13	PRKG2;PDE10A;PDE5A;KCNMA1;KCNMB1;PDE9A;PDE1A
REACTOME_INTERLEUKIN_37_SIGNALING	0.521871	1	0.363489	0.955689	18	PTPN9;PTPN7;IL18R1;PTPN12;PTPN14;STAT3;PTPN23;PTPN2;SIGIRR
REACTOME_INTERLEUKIN_4_AND_INTERLEUKIN_13_SIGNALING	0.543806	1	0.264742	0.95568	85	MMP3;LBP;HGF;PTGS2;VCAM1;ALOX15;CCL11;NOS2;MMP2;FN1;IL1A;HMOX1;VIM;ANXA1;BCL6
REACTOME_TRP_CHANNELS	0.522019	1	0.374575	0.954927	16	TRPC6;RIPK3;TRPC3;MCOLN1
REACTOME_FRS_MEDIATED_FGFR3_SIGNALING	0.526615	1	0.394506	0.954195	13	FGF16;FGFR3;FRS3;SOS1
REACTOME_TP53_REGULATES_TRANSCRIPTION_OF_SEVERAL_ADDITIONAL_CELL_DEATH_GENES_WHOSE_SPECIFIC_ROLES_IN_P53_DEPENDENT_APOPTOSIS_REMAIN_UNCERTAIN	0.531919	1	0.421472	0.952462	10	TP53BP2;BCL6;RABGGTA;RABGGTB;PERP
REACTOME_SIGNALING_BY_FGFR4	0.533055	1	0.32378	0.950073	29	FGF16;SRC;FRS3;SOS1;PPP2CB;KRAS;UBC;PPP2R1A;HRAS;MKNK1;PIK3CA;BRAF
REACTOME_ER_QUALITY_CONTROL_COMPARTMENT_ERQC	0.53102	1	0.361119	0.949456	18	RNF103;RNF185;EDEM1;RNF139;AMFR;UBC;OS9;UGGT1;UGGT2;SEL1L
REACTOME_TRANSLESION_SYNTHESIS_BY_POLH	0.530829	1	0.38461	0.948273	14	RFC4;NPLOC4;RPA1;UBC;RFC5
REACTOME_PI3K_AKT_SIGNALING_IN_CANCER	0.559394	1	0.267294	0.947476	76	FGF16;PIK3CB;HGF;IRS2;SRC;PDGFRA;EREG;PDGFB;FYN;FGFR3;HBEGF;CD19;FGF7;MET;BTC
REACTOME_ACYL_CHAIN_REMODELLING_OF_PC	0.538516	1	0.390812	0.945259	13	MBOAT2;PLA2G1B;PLA2G4A
REACTOME_FGFR2_MUTANT_RECEPTOR_ACTIVATION	0.5422	1	0.342456	0.944043	22	FGF16;GTF2F1;GTF2F2;FGF7;NCBP1;NCBP2;FGFR2
REACTOME_GABA_B_RECEPTOR_ACTIVATION	0.542827	1	0.324083	0.943732	28	ADCY1;GNAL;ADCY8;ADCY7;ADCY6;GNAI1;GNG7;ADCY5;GNB4
REACTOME_TRANSMISSION_ACROSS_CHEMICAL_SYNAPSES	0.596794	1	0.240592	0.943722	150	PPM1F;PRKAR1B;ADCY1;CACNA2D3;SRC;GNAL;CACNA1E;GRIA3;SLC6A4;ADCY8;SYN3;CACNA1A;ADCY7;CACNG4;ADCY6;KPNA2;NAAA;STX1A;GLUL;ARHGEF9;HSPA8;GNAI1;GABRQ;PRKAA2;GNG7;ADCY5;KRAS;MAOA;AP2A1;GNB4;CASK;MAPT;TUBB2B;ERBB4;PPM1E;CACNB2;DNAJC5;GLS;CACNB1;PPFIA1
REACTOME_DOWNSTREAM_SIGNALING_OF_ACTIVATED_FGFR3	0.540583	1	0.3587	0.943096	18	FGF16;FGFR3;FRS3;SOS1
REACTOME_TRIGLYCERIDE_CATABOLISM	0.543611	1	0.368654	0.939834	16	FABP12;FABP1;FABP4;GPD2;PRKACA;MGLL;FABP7;FABP5;PRKACB
REACTOME_FC_EPSILON_RECEPTOR_FCERI_SIGNALING	0.59839	1	0.246477	0.939807	122	CARD11;PRKCQ;TAB3;NFATC2;PIK3CB;TXK;PAK1;FYN;BTK;SOS1;FBXW11;MAP2K4;GAB2;TEC;TAB1;PSMD12;KRAS;UBC;PSMD3;PSMD8;PSMD2;CHUK;ITPR2;PSME1;HRAS;PSMD4;PSMD11;TRAF6;PSMC4;MAPK9;PSMA5;PSMD10;PIK3CA;PSME4;AHCYL1;UBE2V1;PSMC6;PSMD13;PSMD6
REACTOME_SHC_MEDIATED_CASCADE_FGFR3	0.546938	1	0.405531	0.939736	11	FGF16;FGFR3;SOS1;KRAS;HRAS
REACTOME_REGULATION_OF_PLK1_ACTIVITY_AT_G2_M_TRANSITION	0.578071	1	0.264814	0.938683	76	HAUS6;PLK4;CDK5RAP2;CENPJ;CEP152;HAUS3;HAUS8;NINL;BORA;SFI1;FBXW11;CEP57;CEP41;DYNC1H1;NDE1;UBC;PPP1R12A;ODF2;CEP78;PPP2R1A;YWHAG;HSP90AA1
REACTOME_HSF1_ACTIVATION	0.554717	1	0.32948	0.93518	25	HDAC6;HSPB1;CRYBA4;RPA1;COL4A6;HSPA1L;HSP90AA1;HSPH1;HSP90AB1;HSPB2;VCP;DEDD2
REACTOME_NEGATIVE_REGULATION_OF_FGFR3_SIGNALING	0.555235	1	0.346717	0.934785	20	FGF16;SRC;FGFR3;PPP2CB
REACTOME_SYNTHESIS_OF_BILE_ACIDS_AND_BILE_SALTS_VIA_7ALPHA_HYDROXYCHOLESTEROL	0.556186	1	0.402254	0.932142	11	PTGIS;HSD3B7;CYP27A1;ACOT8
REACTOME_RECOGNITION_OF_DNA_DAMAGE_BY_PCNA_CONTAINING_REPLICATION_COMPLEX	0.559709	1	0.328229	0.931631	25	RFC4;POLE;RAD18;RPA1;DDB1;WDR48;UBC;RFC5
REACTOME_SIGNALING_BY_FGFR1	0.570931	1	0.304426	0.930606	35	SRC;FRS3;SPRED2;FLRT3;SOS1;PPP2CB;KRAS;UBC;FLRT1;PPP2R1A;HRAS;MKNK1;FGFR1;PIK3CA;BRAF
REACTOME_DISEASES_OF_METABOLISM	0.649658	1	0.231738	0.926853	175	FMO3;ADAMTSL2;CYP26B1;POMT2;PAPSS2;CSF2RA;ADAMTS14;GPC4;CYP2R1;SBSPON;SLC37A4;THBS1;GPC1;MOGS;AGRN;ADAMTS2;PCCB;GALNS;ADAMTS9;CHST3;BGN;GNE;SFTPB;GAA;SDC4;DPAGT1;VCAN;ADAMTSL5;AHCY;DOLK;PGM1;CFP;ALG1;MMAA;OPLAH;GBE1;B4GALT7;EXT1;DPM2;ADAMTS1;GCLC
REACTOME_DISEASES_OF_GLYCOSYLATION	0.620918	1	0.248229	0.926209	105	ADAMTSL2;POMT2;PAPSS2;ADAMTS14;GPC4;SBSPON;THBS1;GPC1;MOGS;AGRN;ADAMTS2;ADAMTS9;CHST3;BGN;GNE;SDC4;DPAGT1;VCAN;ADAMTSL5;DOLK;PGM1;CFP;ALG1;B4GALT7;EXT1;DPM2;ADAMTS1
REACTOME_TNFR1_INDUCED_PROAPOPTOTIC_SIGNALING	0.562904	1	0.390677	0.926135	12	USP2;FADD;USP4;OTUD7B
REACTOME_CROSS_PRESENTATION_OF_SOLUBLE_EXOGENOUS_ANTIGENS_ENDOSOMES	0.586869	1	0.28595	0.925499	46	MRC2;FCGR1A;PSMD12;PSMD3;PSMD8;PSMD2;PSME1;PSMD4;PSMD11;PSMC4;PSMA5;PSMD10;PSME4;PSMC6;PSMD13;PSMD6
REACTOME_FORMATION_OF_SENESCENCE_ASSOCIATED_HETEROCHROMATIN_FOCI_SAHF	0.566519	1	0.409366	0.925105	10	LMNB1;HMGA1;RB1;ASF1A;UBN1
REACTOME_PROTEIN_PROTEIN_INTERACTIONS_AT_SYNAPSES	0.591229	1	0.290304	0.922839	42	SLITRK6;LRFN4;GRIA3;PPFIBP1;STX1A;NLGN2;SHANK1;PDLIM5;SHARPIN
REACTOME_DAP12_SIGNALING	0.58168	1	0.318108	0.919316	27	PIK3CB;TREM2;HLA-E;FYN;BTK;SOS1
REACTOME_CYCLIN_A_B1_B2_ASSOCIATED_EVENTS_DURING_G2_M_TRANSITION	0.580475	1	0.340546	0.91815	20	CCNA2;PPP2CB;PPME1;CDK7;MNAT1;CDC25A;PKMYT1
REACTOME_SIGNALING_BY_ERBB2_ECD_MUTANTS	0.575468	1	0.365752	0.917303	15	SOS1;KRAS;HSP90AA1;HRAS;PIK3CA;CDC37;PLCG1;EGF
REACTOME_INLB_MEDIATED_ENTRY_OF_LISTERIA_MONOCYTOGENES_INTO_HOST_CELL	0.576842	1	0.395446	0.916365	11	STAM;MET;UBC
REACTOME_NEGATIVE_REGULATION_OF_NMDA_RECEPTOR_MEDIATED_NEURONAL_TRANSMISSION	0.577644	1	0.395172	0.915731	11	PPM1F;PPM1E
REACTOME_AFLATOXIN_ACTIVATION_AND_DETOXIFICATION	0.579965	1	0.404831	0.914857	10	DPEP1;DPEP2;MGST3
REACTOME_HDMS_DEMETHYLATE_HISTONES	0.583347	1	0.343458	0.914855	19	KDM4B;ARID5B;KDM4C;KDM6A;KDM1A;KDM6B;KDM3A;KDM2A;KDM5A
REACTOME_FCGAMMA_RECEPTOR_FCGR_DEPENDENT_PHAGOCYTOSIS	0.63556	1	0.255181	0.913899	81	PIK3CB;FCGR1A;PAK1;MYO5A;SRC;WIPF3;FYN;BAIAP2;WASF1
REACTOME_TRANSLESION_SYNTHESIS_BY_POLK	0.582858	1	0.363582	0.911858	15	RFC4;REV1;POLK;RPA1;UBC;RFC5
REACTOME_L1CAM_INTERACTIONS	0.640187	1	0.254591	0.911786	81	PAK1;SRC;ITGA2;CSNK2A2;GAP43;ITGA5;CNTNAP1;SCN3A;ITGA2B;SCN3B;LAMC1;ANK3;HSPA8;LYPLA2;NCAM1
REACTOME_SIGNALING_BY_FGFR_IN_DISEASE	0.615486	1	0.27839	0.911733	49	FGF16;GTF2F1;GTF2F2;FGFR3;SOS1;FGF7;TRIM24;GAB2;NCBP1;LRRFIP1;KRAS;NCBP2;FGFR2;HRAS;FGFR1;PIK3CA;STAT3;ERLIN2;POLR2B;PLCG1;POLR2F
REACTOME_PROTEIN_FOLDING	0.644185	1	0.252296	0.910752	85	FBXW9;RGS9;CCT6B;CSNK2A2;GNAO1;RGS11;SPHK1;CCT3;TCP1;GNAI1;CCT5;FBXL5;LONP2;GNG7;ARFGEF2
REACTOME_METABOLIC_DISORDERS_OF_BIOLOGICAL_OXIDATION_ENZYMES	0.599277	1	0.339586	0.904541	19	FMO3;CYP26B1;CYP2R1;AHCY;OPLAH;GCLC;CYP27A1;MAOA
REACTOME_N_GLYCAN_TRIMMING_IN_THE_ER_AND_CALNEXIN_CALRETICULIN_CYCLE	0.614824	1	0.301725	0.904042	32	RNF103;MOGS;ENGASE;RNF185;EDEM1;RNF139;AMFR;UBC;RAD23B;OS9
REACTOME_CIRCADIAN_CLOCK	0.639643	1	0.265059	0.903911	61	DBP;PER1;PER2;F7;CRY1;SERPINE1;NRIP1
REACTOME_ONCOGENIC_MAPK_SIGNALING	0.640226	1	0.264966	0.903591	61	CLCN6;SPRED3;SRC;FN1;SPRED2;ITGA2B;TRIM24;VWF;KRAS;SND1;IQGAP1;HRAS;AGGF1;ACTG1;LMNA;BRAF;MAP3K11;MARK3;ITGB3;KIAA1549;ATG7
REACTOME_DOWNSTREAM_SIGNALING_OF_ACTIVATED_FGFR1	0.601386	1	0.33896	0.902873	19	FRS3;FLRT3;SOS1;KRAS;FLRT1;HRAS;FGFR1;PIK3CA
REACTOME_ADRENALINE_NORADRENALINE_INHIBITS_INSULIN_SECRETION	0.611478	1	0.336516	0.896364	19	ADCY6;GNAI1;GNG7;ADCY5;GNB4;CACNB2;CACNA1D
REACTOME_TCF_DEPENDENT_SIGNALING_IN_RESPONSE_TO_WNT	0.721836	1	0.229262	0.895561	145	FRAT2;RNF43;CSNK2A2;CCDC88C;DVL3;DVL2;WNT9A;PPP2CB;PPP2R5D;DVL1;FZD8;RUVBL1;SOX17;TLE1;MEN1;PYGO2;SOX7;SFRP2;CSNK1G2;PSMD12;CBY1;UBC;PSMD3;PSMD8;USP34;RSPO3;FZD4;PSMD2;FZD6;PYGO1;AXIN1;PPP2R1A;WIF1;PSME1;PSMD4;PSMD11;LGR6;PPP2R5B;PSMC4;PSMA5;TLE4;RUNX3;PSMD10;SOX13;PSME4;AKT1;SMURF2;PSMC6;CSNK2B;PSMD13;PSMD6
REACTOME_SIGNALING_BY_NTRK2_TRKB	0.615735	1	0.324762	0.895267	22	SRC;FYN;FRS3;BDNF;SOS1
REACTOME_SEMA3A_PLEXIN_REPULSION_SIGNALING_BY_INHIBITING_INTEGRIN_ADHESION	0.60528	1	0.377594	0.895118	12	FYN;FARP2;RRAS;PLXNA2
REACTOME_SIGNALING_BY_FGFR3_FUSIONS_IN_CANCER	0.607202	1	0.395323	0.89337	10	FGFR3;SOS1;KRAS;HRAS;PIK3CA
REACTOME_MITOTIC_PROMETAPHASE	0.7374	1	0.225525	0.892787	161	TUBGCP6;CENPE;CENPK;HAUS6;CENPM;PLK4;CDK5RAP2;MAD1L1;CSNK2A2;CENPJ;CEP152;TUBGCP2;HAUS3;BUB1B;HAUS8;CDC20;NINL;CENPQ;TUBG2;SFI1;PPP2CB;PPP2R5D
REACTOME_BUDDING_AND_MATURATION_OF_HIV_VIRION	0.620958	1	0.31745	0.892623	24	NEDD4L;VTA1;CHMP4C;VPS4A;UBC;MVB12B;PDCD6IP;CHMP3;CHMP5
REACTOME_BILE_ACID_AND_BILE_SALT_METABOLISM	0.62001	1	0.323741	0.892454	22	CH25H;CYP39A1;PTGIS;HSD3B7;OSBPL7;CYP27A1;OSBPL1A;ACOT8
REACTOME_SIGNALING_BY_ACTIVIN	0.608942	1	0.385111	0.892417	11	FST;ACVR1B
REACTOME_CLATHRIN_MEDIATED_ENDOCYTOSIS	0.719647	1	0.235098	0.888045	114	STAM;EREG;COPS7B;DVL2;NECAP1;HBEGF;FCHO1;CHRM2;REPS1;EPN2;VAMP7;HSPA8;BTC;ITSN2;HIP1;PICALM;CTTN;UBC;TOR1A;AP2A1;FZD4;IGF2R;LDLR;SCARB2;SNX9;PACSIN3;SYNJ2;DAB2;STON1
REACTOME_SIGNALING_BY_FGFR2_IN_DISEASE	0.650351	1	0.294712	0.88303	32	FGF16;GTF2F1;GTF2F2;SOS1;FGF7;NCBP1;KRAS;NCBP2;FGFR2;HRAS
REACTOME_AURKA_ACTIVATION_BY_TPX2	0.688402	1	0.257087	0.881829	63	HAUS6;PLK4;CDK5RAP2;CENPJ;CEP152;HAUS3;HAUS8;NINL;SFI1;CEP57;CEP41;DYNC1H1;NDE1;ODF2;CEP78;PPP2R1A;YWHAG;HSP90AA1;PRKACA;TPX2;TUBA1A
REACTOME_MITOPHAGY	0.639053	1	0.316184	0.88107	23	SRC;CSNK2A2;UBC;TOMM20;CSNK2B;VDAC1
REACTOME_PLATELET_CALCIUM_HOMEOSTASIS	0.636775	1	0.323115	0.880838	21	TRPC6;TRPC3;ATP2B1;P2RX6;ATP2A3;P2RX4
REACTOME_BASIGIN_INTERACTIONS	0.638818	1	0.329808	0.878497	19	SLC7A7;SLC16A1;SLC16A3;ITGA3;SLC7A10
REACTOME_MISMATCH_REPAIR	0.629924	1	0.3563	0.878474	14	MSH3;RPA1
REACTOME_G_ALPHA_Q_SIGNALLING_EVENTS	0.748837	1	0.23112	0.877255	118	PRKCQ;TRPC6;MMP3;QRFP;TRPC3;DGKH;P2RY2;GPR39;RGS4;F2RL2;EDN1;PTGER1;HBEGF;RGS1;BTK;EDN3;SOS1;ANXA1;GPR68;ADRA1B
REACTOME_MAPK_FAMILY_SIGNALING_CASCADES	0.81452	1	0.21313	0.876525	223	FGF16;HGF;SPRED3;PAK1;SHC2;MMP2;IRS2;SRC;PDGFRA;FN1;EREG;CSF2RA;PDGFB;FYN;FLT3LG;FGFR3;FRS3;SPRED2;HSPB1;IL3RA;PAQR3;HBEGF;RASA2;ITGA2B;SOS1;PPP2CB;PPP2R5D;FGF7;DUSP10
REACTOME_MITOTIC_G2_G2_M_PHASES	0.787294	1	0.21989	0.875821	169	TUBGCP6;CCNA2;HAUS6;PLK4;CDK5RAP2;CENPJ;CEP152;GTSE1;TUBGCP2;HAUS3;FKBPL;HAUS8;NINL;BORA;TUBG2;SFI1;PPP2CB;PPME1;FBXW11;CDK7;MNAT1;CEP57;CDC25A;PSMD12;PKMYT1;E2F3;CEP41;DYNC1H1;NDE1;UBC;PSMD3;PSMD8;PPP1R12A;PSMD2;TUBB2B;ODF2;CEP78;PPP2R1A;YWHAG;HSP90AA1;PSME1;PSMD4;PSMD11;PRKACA;PSMC4;TPX2;PSMA5;TUBA1A;TUBB3;E2F1;PSMD10;RBBP4;PSME4;PSMC6;PSMD13;PSMD6;HSP90AB1;PPP2R2A;TUBB4B;PAFAH1B1;EP300
REACTOME_REGULATION_OF_PTEN_STABILITY_AND_ACTIVITY	0.704375	1	0.254355	0.874761	64	CSNK2A2;OTUD3;USP13;PSMD12;FRK;UBC;PSMD3;PSMD8;PSMD2;PSME1;PTEN;PSMD4;PSMD11;TRIM27;PSMC4;PSMA5;PSMD10;PSME4;AKT1;PSMC6;CSNK2B;PSMD13;PSMD6
REACTOME_CLASS_I_PEROXISOMAL_MEMBRANE_PROTEIN_IMPORT	0.646086	1	0.327916	0.873457	19	ABCD2;SLC25A17;PXMP4;PEX13;PEX14
REACTOME_C_TYPE_LECTIN_RECEPTORS_CLRS	0.755166	1	0.231157	0.87316	114	CARD11;TAB3;NFATC2;CLEC4D;PAK1;SRC;FYN;FBXW11;CLEC6A;TAB1;PAK3;PSMD12;KRAS;UBC;PSMD3;PSMD8;PSMD2;UBE2M;CHUK;ITPR2;PSME1;HRAS;PSMD4;PSMD11;ICAM2;PRKACA;TRAF6;PSMC4;PSMA5;PSMD10;PSME4;AHCYL1;UBE2V1;PSMC6;PSMD13;PSMD6
REACTOME_PLATELET_ADHESION_TO_EXPOSED_COLLAGEN	0.638814	1	0.354024	0.872861	14	ITGA2;FYN;COL1A2;VWF;COL1A1;GP5;ITGA1;GP9
REACTOME_REGULATION_OF_HSF1_MEDIATED_HEAT_SHOCK_RESPONSE	0.713444	1	0.249852	0.872801	70	HSPB1;CRYBA4;BAG5;HSPA12A;NUP50;NUP88;RPA1;BAG2;HSPA8;ATR;COL4A6;NUP62;RAE1;NUP107;HSPA4L;NUP155;SIRT1;DNAJC2;NUP188;HSPA1L;CCAR2;HSPA14;HSPA4;HSPH1;NUP35;HSPA13;NUP37;NUP85;HSPA2
REACTOME_METABOLISM_OF_CARBOHYDRATES	0.822015	1	0.212891	0.872393	216	CHST11;PGM2L1;PAPSS2;CSGALNACT1;HS6ST2;B3GALT1;GPC4;HS3ST1;HS3ST6;B3GNT4;G6PD;SLC37A4;GPC1;ALDOC;AGRN;GALNS;PPP2CB;RPE;SLC37A1;CHST3;CD44;PPP2R5D;BGN;GLB1L;GAA;SDC4;NUP50;VCAN;NUP88;PGM1;ALDH1A1;CHPF;GBE1;LYVE1;NUP62;B4GALT7;EXT1;HS6ST1;DSEL;RAE1;GOT2;ADPGK;NUP107;GLCE;PFKL;UBC;PYGM;NUP155;GPI;PHKA2;SLC26A2
REACTOME_ZINC_TRANSPORTERS	0.637404	1	0.360537	0.872033	13	SLC39A4;SLC39A2;SLC39A7;SLC39A14;SLC30A1
REACTOME_GLYCOGEN_STORAGE_DISEASES	0.636515	1	0.375965	0.871223	11	SLC37A4;GAA;GBE1;UBC;NHLRC1
REACTOME_PENTOSE_PHOSPHATE_PATHWAY	0.638016	1	0.367467	0.871113	12	G6PD;RPE;PGM2;RBKS
REACTOME_PHASE_2_PLATEAU_PHASE	0.639063	1	0.359995	0.870722	13	CACNA2D3;CACNG4;CACNA2D1;CACNB2;CACNB1;CACNA1D
REACTOME_TGF_BETA_RECEPTOR_SIGNALING_IN_EMT_EPITHELIAL_TO_MESENCHYMAL_TRANSITION	0.643316	1	0.352513	0.869137	14	CGN;TGFBR1;UBC;F11R;PARD3
REACTOME_FRS_MEDIATED_FGFR2_SIGNALING	0.645424	1	0.351863	0.867534	14	FGF16;FRS3;SOS1;FGF7;KRAS;FGFR2;HRAS
REACTOME_THE_CITRIC_ACID_TCA_CYCLE_AND_RESPIRATORY_ELECTRON_TRANSPORT	0.786455	1	0.224897	0.866657	132	D2HGDH;TIMMDC1;COQ10B;SCO1;SLC16A1;ME1;SLC16A3;CS;PPARD;SLC25A14;L2HGDH;COX18;NUBPL;ME3;IDH2;DLST;PDPR;PDHX;ADHFE1;COQ10A
REACTOME_SIGNALING_BY_FGFR2_IIIA_TM	0.656292	1	0.32532	0.866541	19	GTF2F1;GTF2F2;NCBP1;NCBP2;FGFR2
REACTOME_RECEPTOR_TYPE_TYROSINE_PROTEIN_PHOSPHATASES	0.642831	1	0.382927	0.865358	10	SLITRK6;PPFIBP1;PPFIA1
REACTOME_SIGNALING_BY_ERBB2	0.694719	1	0.273536	0.86529	41	SRC;EREG;FYN;HBEGF;MEMO1;SOS1;YES1;BTC;KRAS;UBC;ERBB4;PTPN12;HSP90AA1;HRAS;PRKCE;PIK3CA;AKT1
REACTOME_MTORC1_MEDIATED_SIGNALLING	0.663811	1	0.313845	0.865172	22	EEF2K;RPTOR;SLC38A9;RRAGA;RRAGC;AKT1S1;EIF4B
REACTOME_ROLE_OF_PHOSPHOLIPIDS_IN_PHAGOCYTOSIS	0.664376	1	0.313728	0.86485	22	PIK3CB;FCGR1A;CD247;ITPR2;PRKCE;PIK3CA;PLD3;AHCYL1
REACTOME_RHO_GTPASES_ACTIVATE_FORMINS	0.760595	1	0.233603	0.864715	100	CENPE;CENPK;CENPM;SRC;MAD1L1;DVL3;DVL2;BUB1B;CDC20;CENPQ;PPP2CB;PPP2R5D;DVL1;CLIP1;CENPO;MIS12;AHCTF1;DYNC1H1;NUP107;NDE1;ZWINT;TUBB2B;PPP2R1A;PPP2R5B;NUDC;TUBA1A;TUBB3;ACTG1;CENPP;NDEL1;DYNC1LI1;NUP37;NUP85;CENPL;TUBB4B;PAFAH1B1
REACTOME_FGFR2_ALTERNATIVE_SPLICING	0.66828	1	0.304492	0.864256	25	GTF2F1;GTF2F2;NCBP1;NCBP2;FGFR2;PTBP1;HNRNPM;POLR2B;POLR2F
REACTOME_NEUROTRANSMITTER_RECEPTORS_AND_POSTSYNAPTIC_SIGNAL_TRANSMISSION	0.775743	1	0.228726	0.863978	114	PPM1F;PRKAR1B;ADCY1;SRC;GNAL;GRIA3;ADCY8;ADCY7;CACNG4;ADCY6;KPNA2;ARHGEF9;GNAI1;GABRQ;PRKAA2;GNG7;ADCY5;KRAS;AP2A1;GNB4;CASK;MAPT;TUBB2B;ERBB4;PPM1E
REACTOME_CELLULAR_RESPONSE_TO_HEAT_STRESS	0.75495	1	0.237714	0.862899	88	HDAC6;HSPB1;CRYBA4;BAG5;HSPA12A;RPTOR;NUP50;NUP88;RPA1;BAG2;HSPA8;ATR;COL4A6;NUP62;RAE1;NUP107;HSPA4L;NUP155;SIRT1;DNAJC2;AKT1S1;NUP188;HSPA1L;HSP90AA1;CCAR2;HSPA14;HSPA4;HSPH1;NUP35;HSPA13;NUP37;NUP85;HSPA2;HSP90AB1;EP300;RPS19BP1
REACTOME_MTOR_SIGNALLING	0.693199	1	0.276841	0.861774	38	EEF2K;RPTOR;SLC38A9;TSC1;RRAGA;PRKAA2;RRAGC;PPM1A;STRADB;AKT1S1;STRADA;EIF4B;AKT1;PRKAA1
REACTOME_SUPPRESSION_OF_PHAGOSOMAL_MATURATION	0.65182	1	0.371026	0.859776	11	NOS2;UBC;RAB5A
REACTOME_CARDIAC_CONDUCTION	0.753156	1	0.24042	0.857772	79	KCNK6;TNNI3;CACNA2D3;FXYD3;HIPK2;CASQ2;SCN3A;CACNG4;KCNK1;SCN3B;ATP2B1;NPR1;CORIN;CASQ1;ATP2A3
REACTOME_ACTIVATION_OF_THE_MRNA_UPON_BINDING_OF_THE_CAP_BINDING_COMPLEX_AND_EIFS_AND_SUBSEQUENT_BINDING_TO_43S	0.73519	1	0.254612	0.852365	55	EIF2S2;EIF1AX;EIF3C;EIF3D;EIF3A;EIF4B;EIF3L;EIF4A1;EIF4A2;EIF3I;EIF3E;EIF4EBP1;EIF3M;EIF4H;RPS20;EIF3B;RPS12;RPS4Y1;RPS7;EIF4G1;EIF3K;RPS25;FAU;RPS2;EIF3H;RPS17;RPS14;RPS15A;EIF2S3;RPS27L;RPS15;EIF3F;RPS13;RPS24;RPS11;RPS10;RPS27A;RPS5;RPSA;RPS18;RPS9;RPS3;PABPC1;RPS8;RPS6;RPS16;RPS23;RPS28;RPS26;RPS21
REACTOME_MET_ACTIVATES_RAP1_AND_RAC1	0.662463	1	0.367437	0.851461	11	HGF;MET
REACTOME_NEGATIVE_REGULATION_OF_FGFR2_SIGNALING	0.682452	1	0.312324	0.851419	21	FGF16;SRC;PPP2CB;FGF7;UBC;PPP2R1A;FGFR2;MKNK1
REACTOME_DOWNSTREAM_SIGNALING_OF_ACTIVATED_FGFR2	0.681504	1	0.318763	0.849077	19	FGF16;FRS3;SOS1;FGF7;KRAS;FGFR2;HRAS;PIK3CA
REACTOME_UCH_PROTEINASES	0.77611	1	0.237338	0.848133	80	SENP8;UCHL1;MBD6;RUVBL1;TGFBR1;INO80;BARD1;PSMD12;UBC;PSMD3;PSMD8;PSMD2;PSME1;PSMD4;PSMD11;PSMC4;PSMA5;INO80E;MCRS1;PSMD10;PSME4;SMAD7;BAP1;PSMC6;PSMD13;PSMD6
REACTOME_RUNX2_REGULATES_BONE_DEVELOPMENT	0.69862	1	0.295292	0.846205	26	SRC;HDAC6;ZNF521;GLI3;YES1;RBM14;COL1A1;AR
REACTOME_RUNX1_REGULATES_GENES_INVOLVED_IN_MEGAKARYOCYTE_DIFFERENTIATION_AND_PLATELET_FUNCTION	0.719085	1	0.277536	0.843139	34	PRKCQ;NR4A3;THBS1;ITGA2B;ZFPM1;PF4
REACTOME_CALNEXIN_CALRETICULIN_CYCLE	0.703176	1	0.301798	0.840982	23	RNF103;RNF185;EDEM1;RNF139;AMFR;UBC;OS9;UGGT1;UGGT2;SEL1L
REACTOME_DEGRADATION_OF_GLI1_BY_THE_PROTEASOME	0.759054	1	0.251911	0.84035	54	SUFU;GLI1;PSMD12;NUMB;UBC;PSMD3;PSMD8;PSMD2;PSME1;PSMD4;PSMD11;PRKACA;PSMC4;PSMA5;PSMD10;PSME4;PSMC6;PSMD13;PSMD6
REACTOME_METABOLISM_OF_COFACTORS	0.694879	1	0.319046	0.838838	18	PDSS2;PRKG2;PDSS1;COQ3;HSP90AA1;COQ9;AKT1
REACTOME_RET_SIGNALING	0.722425	1	0.28143	0.838092	31	PIK3CB;IRS2;SRC;RAP1GAP;SOS1;GAB2
REACTOME_ABC_FAMILY_PROTEINS_MEDIATED_TRANSPORT	0.805919	1	0.231425	0.836549	86	ABCC10;ABCD2;ABCB1;ABCB9;ABCA8;EIF2S2;ABCA9;ABCC4;PSMD12;RNF185;UBC;PSMD3;PSMD8;PSMD2;ABCA2;ABCA3;PSME1;PSMD4;PSMD11;OS9;PSMC4;PSMA5;PSMD10;PSME4;PSMC6;PSMD13;PSMD6;ABCF1;ERLIN2
REACTOME_BETA_CATENIN_PHOSPHORYLATION_CASCADE	0.691592	1	0.333281	0.835864	15	FRAT2;PPP2CB;PPP2R5D;AXIN1;PPP2R1A;PPP2R5B
REACTOME_M_PHASE	0.934365	1	0.197262	0.835528	297	TUBGCP6;CENPE;LPIN3;CENPK;HAUS6;CENPM;PLK4;CDK5RAP2;MAD1L1;CSNK2A2;CENPJ;MASTL;LMNB1;CEP152;VRK2;TUBGCP2;HAUS3;BUB1B;HAUS8;CDC20;NINL;CENPQ;TUBG2;SFI1;PPP2CB;PPP2R5D;NUP50;UBE2C;NUP88;ANKLE2;CC2D1B;LEMD2;NCAPD2;LPIN1;CLIP1;CEP57;CENPO;MAU2;CHMP4C;VPS4A;NUP62;MIS12;PSMD12;AHCTF1;HDAC8;RAE1;CEP41;DYNC1H1;NUP107;NDE1;UBC;PSMD3;NUP155;PSMD8;ANAPC10;PSMD2;ZWINT;TUBB2B;NUP188;ODF2;CEP78;PPP2R1A;YWHAG;R…
REACTOME_ADP_SIGNALLING_THROUGH_P2Y_PURINOCEPTOR_12	0.692786	1	0.333073	0.835343	15	P2RY12;GNAI1;GNG7;GNB4
REACTOME_CLEC7A_DECTIN_1_SIGNALING	0.816433	1	0.227745	0.834726	93	CARD11;TAB3;NFATC2;SRC;FBXW11;TAB1;PSMD12;UBC;PSMD3;PSMD8;PSMD2;UBE2M;CHUK;ITPR2;PSME1;PSMD4;PSMD11;TRAF6;PSMC4;PSMA5;PSMD10;PSME4;AHCYL1;UBE2V1;PSMC6;PSMD13;PSMD6
REACTOME_RESPONSE_OF_EIF2AK4_GCN2_TO_AMINO_ACID_DEFICIENCY	0.812892	1	0.231005	0.830846	83	TRIB3;EIF2S2;ASNS;DDIT3;CEBPG;RPL10A;RPL22;RPS20;RPL7A;EIF2AK4;RPL3;RPL39;RPL15;RPS12;RPS4Y1;RPS7;RPL28;RPS25;RPL6;RPL10;FAU;RPS2;RPL27A;RPL7;RPL11;RPL21;RPS17;RPL18A;RPS14;RPS15A;EIF2S3;RPS27L;RPL17;RPS15;RPLP0;RPL18;RPL31;RPL23;RPS13;RPL30;RPL36AL;RPS24;RPS11;RPL24;RPL14;RPS10;RPL27;RPS27A;RPLP2;RPL12;IMPACT;RPS5;RPL26;RPL13A;RPSA;RPL5;RPL8;RPS18;RPS9;RPL37A;RPS3;RPS8;RPL9;RPS6;RPS16;RPS23;RPL3…
REACTOME_INTERFERON_GAMMA_SIGNALING	0.785289	1	0.243786	0.829228	60	TRIM62;FCGR1A;VCAM1;TRIM46;TRIM10;HLA-E
REACTOME_VEGFR2_MEDIATED_CELL_PROLIFERATION	0.709705	1	0.315168	0.828641	18	SRC;SPHK1;KRAS;ITPR2;HRAS;AHCYL1;PLCG1;PRKCA
REACTOME_KILLING_MECHANISMS	0.693417	1	0.357375	0.828145	11	DVL3;DVL2;DVL1
REACTOME_INTERLEUKIN_27_SIGNALING	0.69227	1	0.366422	0.828058	10	EBI3;STAT3
REACTOME_PECAM1_INTERACTIONS	0.69652	1	0.348989	0.827308	12	SRC;FYN;YES1
REACTOME_LDL_CLEARANCE	0.703282	1	0.335408	0.826964	14	LSR;LIPA;AP2A1;LDLR;CLTA;NPC2;CLTC;LDLRAP1
REACTOME_FCGR_ACTIVATION	0.697621	1	0.356027	0.825021	11	FCGR1A;SRC;FYN;YES1
REACTOME_RAP1_SIGNALLING	0.705847	1	0.334608	0.82499	14	RAP1GAP;RAPGEF4;PRKACA;PRKACB
REACTOME_TRAF3_DEPENDENT_IRF_ACTIVATION_PATHWAY	0.703202	1	0.341057	0.824917	13	RNF135;DDX58;IFIH1;IKBKE;MAVS;EP300
REACTOME_VITAMIN_B5_PANTOTHENATE_METABOLISM	0.711222	1	0.332983	0.820984	14	PPCS;AASDHPPT;ENPP1;PANK1;COASY;PANK4;PANK3
REACTOME_GLYCOSPHINGOLIPID_METABOLISM	0.754686	1	0.271842	0.820585	33	GLA;GBA2;B3GALNT1;GLB1L;ARSK;NEU3;ASAH1;CERK;UGCG;ESYT2;SMPD4
REACTOME_AGGREPHAGY	0.744814	1	0.28146	0.819611	28	HDAC6;VIM;DYNC1H1;UBC;TUBB2B;ARL13B;HSP90AA1;TUBA1A;TUBB3;DYNC1LI1;UBE2V1;TUBB4B
REACTOME_IKK_COMPLEX_RECRUITMENT_MEDIATED_BY_RIP1	0.730995	1	0.300362	0.81881	21	RIPK3;TLR4;CD14;UBC;CHUK;TRAF6;UBE2V1;TICAM1;UBE2D3
REACTOME_EXTRA_NUCLEAR_ESTROGEN_SIGNALING	0.811133	1	0.238689	0.816573	62	MMP3;MMP2;SRC;EREG;SPHK1;HSPB1;HBEGF;GNAI1;BTC;GNG7;PTK2;KRAS;GNB4;FOXO3;IGF1R;HSP90AA1;HRAS
REACTOME_ROLE_OF_LAT2_NTAL_LAB_ON_CALCIUM_MOBILIZATION	0.717832	1	0.331066	0.816257	14	PIK3CB;FYN;SOS1;GAB2
REACTOME_CD209_DC_SIGN_SIGNALING	0.729963	1	0.310126	0.815386	18	PAK1;FYN;PAK3;KRAS;HRAS;ICAM2;PRKACA
REACTOME_SYNTHESIS_OF_PC	0.736766	1	0.299	0.815096	21	LPIN3;CSNK2A2;CHKB;PCYT1B;CHKA;LPIN1;PCYT1A
REACTOME_ACTIVATION_OF_SMO	0.720093	1	0.330438	0.814711	14	EFCAB7;EVC2;KIF3A
REACTOME_CHOLESTEROL_BIOSYNTHESIS	0.74646	1	0.294219	0.811069	22	SQLE;HSD17B7;SC5D;DHCR24;HMGCR;HMGCS1;FDFT1;EBP;GGPS1
REACTOME_SIGNALING_BY_WNT	0.946264	1	0.196979	0.808386	219	WNT6;WNT16;FRAT2;PRKG2;RNF43;CSNK2A2;CCDC88C;ROR2;GNAO1;DVL3;DVL2;WNT9A;PPP2CB;PPP2R5D;DVL1;FZD8;RUVBL1;SOX17;TLE1;MEN1;PYGO2;GNG7;SOX7;SFRP2;VPS26A;CSNK1G2;PSMD12;ROR1;KRAS;CBY1;UBC;PSMD3;PSMD8;AP2A1;USP34;GNB4;RSPO3;FZD4;PSMD2;FZD6;TMED5;PYGO1;AXIN1;PPP2R1A;TNRC6A;WIF1;ITPR2;PSME1;PSMD4;PSMD11;LGR6;PPP2R5B;PSMC4;PSMA5;TLE4;WLS;RUNX3;PSMD10;CLTA;SOX13;PSME4;AKT1;SMURF2;PSMC6;CSNK2B;PSMD13;PSMD6
REACTOME_ENERGY_DEPENDENT_REGULATION_OF_MTOR_BY_LKB1_AMPK	0.766039	1	0.278844	0.805846	27	RPTOR;SLC38A9;TSC1;RRAGA;PRKAA2;RRAGC;PPM1A;STRADB;STRADA
REACTOME_CARBOXYTERMINAL_POST_TRANSLATIONAL_MODIFICATIONS_OF_TUBULIN	0.766147	1	0.280801	0.804681	26	TTLL11;LRRC49;TTLL4
REACTOME_SIGNALING_BY_ERBB4	0.804145	1	0.251757	0.804116	43	SRC;EREG;HBEGF;SOS1;SPARC;NCSTN;BTC;GABRQ;KRAS;UBC;ERBB4;WWOX;WWP1;STMN1;HRAS
REACTOME_MASTL_FACILITATES_MITOTIC_PROGRESSION	0.723817	1	0.355421	0.803197	10	MASTL;PPP2CB;PPP2R1A
REACTOME_CARGO_CONCENTRATION_IN_THE_ER	0.763453	1	0.285228	0.802019	24	F5;CD59
REACTOME_CITRIC_ACID_CYCLE_TCA_CYCLE	0.762584	1	0.292681	0.79787	21	CS;ME3;IDH2;DLST;MDH2;SDHA;ACO2;SDHC;IDH3A;FH
REACTOME_SIGNALING_BY_PTK6	0.821766	1	0.246826	0.795505	45	EREG;SRMS;PELP1;HBEGF;BCAR1;BTC;KRAS;UBC;SOCS3;KHDRBS1;ERBB4;STAP2;HRAS;PXN;SFPQ;STAT3;AKT1
REACTOME_SLC_TRANSPORTER_DISORDERS	0.845851	1	0.234039	0.793619	59	SLC36A2;SLC39A4;SLC7A7;SLC16A1;SLC27A4;SLC20A2;NUP50;SLCO2A1;SLC35C1;NUP88;SLC35A3;NUP62;RAE1;NUP107;NUP155;SLC26A2
REACTOME_ORGANELLE_BIOGENESIS_AND_MAINTENANCE	0.969123	1	0.191584	0.793044	236	FBF1;IFT140;BBS7;HAUS6;PLK4;WDR19;MKS1;CDK5RAP2;CYS1;HDAC6;CENPJ;TTC26;CEP152;HAUS3;TMEM67;HAUS8;NINL;TTC30B;IFT57;IQCB1;CCT3;ARL6;SFI1;TTC21B;RAB3IP;ACSS2;DYNC2LI1;TCP1;CCT5;CEP57;PKD2;EXOC7;PRKAA2;KIF3B;IFT122;KIF3A;IDH2;CEP41;DYNC1H1;MEF2D;NDE1;MARK4;GLUD1;TCTN3;NR1D1;TUBB2B;BBS4;ODF2;KIFAP3;SMARCD3;CEP78;PPP2R1A;ARL13B;YWHAG
REACTOME_INTERACTION_BETWEEN_L1_AND_ANKYRINS	0.748002	1	0.327553	0.792254	13	SCN3A;SCN3B;ANK3
REACTOME_FRS_MEDIATED_FGFR4_SIGNALING	0.744603	1	0.3336	0.790828	12	FGF16;FRS3;SOS1;KRAS
REACTOME_DOWNSTREAM_SIGNALING_EVENTS_OF_B_CELL_RECEPTOR_BCR	0.874182	1	0.223054	0.788981	75	CARD11;NFATC2;FBXW11;PSMD12;KRAS;UBC;PSMD3;PSMD8;PSMD2;CHUK;PSME1;HRAS;PSMD4;PSMD11;PSMC4;PSMA5;PSMD10;PSME4;PSMC6;PSMD13;PSMD6
REACTOME_EPH_EPHRIN_MEDIATED_REPULSION_OF_CELLS	0.826334	1	0.248401	0.785779	41	MMP2;SRC;FYN;EPHA1;EFNA1;NCSTN;YES1;EFNA4;EPHB4
REACTOME_INTRA_GOLGI_AND_RETROGRADE_GOLGI_TO_ER_TRAFFIC	0.952684	1	0.197557	0.785113	166	KIF16B;CENPE;KIF20B;KIF22;PLA2G4A;KIF9;RGP1;KIF26B;KIF21A;ARF3;ACTR10;VTI1A;CYTH2;KDELR3;BNIP1;NAPB;VPS54;USP6NL;COG1;AGPAT3;COG7;KIF3B;YKT6;KIF3A;COPB2;BICD2;MAN2A1;DYNC1H1;KIF1A
REACTOME_SYNTHESIS_OF_PIPS_AT_THE_PLASMA_MEMBRANE	0.84633	1	0.238906	0.782421	49	PIK3C2B;PIK3CB;PIP5K1A;BMX;MTMR1;MTMR2;PI4K2B;MTMR14;MTMR6;SYNJ2;RAB5A;INPPL1;PTEN;PLEKHA8;PIK3CA;MTMR3;MTMR9;PLEKHA3
REACTOME_NEGATIVE_REGULATION_OF_FGFR4_SIGNALING	0.786213	1	0.291817	0.777302	19	FGF16;SRC;PPP2CB;UBC;PPP2R1A;MKNK1;BRAF
REACTOME_TP53_REGULATES_METABOLIC_GENES	0.89367	1	0.219255	0.775543	75	SESN3;SCO1;G6PD;RPTOR;SLC38A9;TSC1;COX18;RRAGA;PRKAA2;DDIT4;RRAGC;RRM2B;GPI;GLS;TNRC6A;YWHAG
REACTOME_DOWNSTREAM_SIGNALING_OF_ACTIVATED_FGFR4	0.786835	1	0.298596	0.773093	17	FGF16;FRS3;SOS1
REACTOME_COPI_INDEPENDENT_GOLGI_TO_ER_RETROGRADE_TRAFFIC	0.845366	1	0.244362	0.773001	41	PLA2G4A;ACTR10;AGPAT3;BICD2;DYNC1H1;TUBB2B;PAFAH1B2;RAB6B;TUBA1A;TUBB3;DCTN5;DYNC1LI1;TUBB4B;PAFAH1B1
REACTOME_RHO_GTPASES_ACTIVATE_WASPS_AND_WAVES	0.830403	1	0.254413	0.772891	34	WIPF3;BAIAP2;WASF1;BTK;PTK2;NCKAP1;CYFIP1;ARPC4;ACTG1
REACTOME_TRAF6_MEDIATED_IRF7_ACTIVATION	0.782456	1	0.306979	0.769899	15	RNF135;DDX58;IFIH1;IKBKE;TRAF6;MAVS;EP300
REACTOME_PARASITE_INFECTION	0.883667	1	0.228069	0.765997	56	MYO5A;SRC;WIPF3;FYN;BAIAP2;WASF1;BTK;YES1
REACTOME_SIGNALING_BY_NUCLEAR_RECEPTORS	0.976317	1	0.189486	0.765637	191	FKBP5;RARB;MMP3;CYP26B1;ADH1C;MMP2;SRC;ALDH1A3;EREG;GTF2F1;GTF2F2;NRIP1;SPHK1;HSPB1;HBEGF;KDM4B;KPNA2
REACTOME_SYNAPTIC_ADHESION_LIKE_MOLECULES	0.78628	1	0.315371	0.762788	13	LRFN4;GRIA3
REACTOME_DEADENYLATION_OF_MRNA	0.816153	1	0.276677	0.762713	22	PAN2;CNOT3;CNOT10;PARN;EIF4B;PAIP1;EIF4A1;EIF4A2;CNOT4;TNKS1BP1;CNOT2;EIF4A3
REACTOME_MITOTIC_SPINDLE_CHECKPOINT	0.920129	1	0.212016	0.762549	83	CENPE;CENPK;CENPM;MAD1L1;BUB1B;CDC20;CENPQ;PPP2CB;PPP2R5D;UBE2C;CLIP1;CENPO;MIS12;AHCTF1;DYNC1H1;NUP107;NDE1;ANAPC10;ZWINT;PPP2R1A;PPP2R5B;ANAPC1;NUDC;ANAPC7;CENPP;NDEL1;DYNC1LI1;NUP37;NUP85
REACTOME_HEDGEHOG_ON_STATE	0.912888	1	0.215108	0.762492	76	EFCAB7;SUFU;GLI1;PTCH2;EVC2;GLI3;KIF3A;PSMD12;SPOPL;NUMB;UBC;PSMD3;PSMD8;KIF7;PSMD2;PSME1;PSMD4;PSMD11;PSMC4;SMO;PSMA5;PSMD10;PSME4;SMURF2;PSMC6;PSMD13;PSMD6
REACTOME_EPHB_MEDIATED_FORWARD_SIGNALING	0.8505	1	0.248625	0.760029	35	PAK1;SRC;FYN;YES1;EPHB4;PTK2;ROCK2;EPHB2;LIMK2;HRAS;ARPC4;ROCK1;ACTG1
REACTOME_DEATH_RECEPTOR_SIGNALLING	0.954308	1	0.199343	0.756641	118	TAB3;USP2;NGEF;OBSCN;FGD2;ARHGEF15;SOS1;NCSTN;AKAP13;ARHGEF9;MADD;TAB1;SPPL2A;SHARPIN;RNF31;TRAF1;FADD;CFLAR;UBC;TIAM2;PLEKHG5;USP4;CHUK;OTUD7B;ARHGEF10L
REACTOME_ABC_TRANSPORTERS_IN_LIPID_HOMEOSTASIS	0.794233	1	0.312591	0.756066	13	ABCD2;ABCA9;ABCA2;ABCA3
REACTOME_GAP_JUNCTION_DEGRADATION	0.783517	1	0.334538	0.756005	10	DAB2;ACTG1;CLTA;MYO6;CLTC
REACTOME_SIGNALING_BY_LEPTIN	0.783822	1	0.334417	0.755733	10	IRS2;SH2B1;SOCS3;STAT3
REACTOME_NRAGE_SIGNALS_DEATH_THROUGH_JNK	0.884768	1	0.229903	0.755696	50	NGEF;OBSCN;FGD2;ARHGEF15;SOS1;AKAP13;ARHGEF9
REACTOME_UB_SPECIFIC_PROCESSING_PROTEASES	0.971894	1	0.192635	0.755613	150	USP28;USP2;CCNA2;KAT2A;USP13;TADA2B;CDC20;USP33;USP9X;DDX58;RUVBL1;TGFBR1;IL33;TAB1;CDC25A;AR;IFIH1;USP5;PSMD12;WDR48;SKP2;UBC;PSMD3;PSMD8;RNF123;USP34;PSMD2;AXIN1;USP3;USP4;PSME1;POLB;PTEN;PSMD4;PSMD11;TRAF6;PSMC4;MUL1;PSMA5;ATXN7;SMAD2;TOMM20;PSMD10;PSME4;SMURF2;SMAD7;PSMC6;PSMD13;PSMD6;USP22;VDAC1;SIAH2;AXIN2
REACTOME_VEGFR2_MEDIATED_VASCULAR_PERMEABILITY	0.836632	1	0.263467	0.755007	26	TRIB3;PAK1;JUP;PAK3;RICTOR;HSP90AA1
REACTOME_SEMA3A_PAK_DEPENDENT_AXON_REPULSION	0.802283	1	0.305385	0.75294	14	PAK1;FYN;PAK3;HSP90AA1;PLXNA2;HSP90AB1
REACTOME_RAB_GEFS_EXCHANGE_GTP_FOR_GDP_ON_RABS	0.929274	1	0.210514	0.752279	80	MON1B;MON1A;TRAPPC12;TRAPPC11;RGP1;TRAPPC10;RAB38;DENND4B;RAB3IP;MADD
REACTOME_PCNA_DEPENDENT_LONG_PATCH_BASE_EXCISION_REPAIR	0.82417	1	0.279002	0.752219	20	RFC4;POLE;RPA1;APEX1;RFC5;POLB;POLD4
REACTOME_TRNA_MODIFICATION_IN_THE_NUCLEUS_AND_CYTOSOL	0.867944	1	0.241374	0.751371	38	WDR4;TYW1;THADA;TYW5;TRMT1;ADAT3;ADAT2;TRMT6;TRMT12;NSUN2;TYW3;NSUN6;TRMT11;LCMT2
REACTOME_METABOLISM_OF_ANGIOTENSINOGEN_TO_ANGIOTENSINS	0.793714	1	0.323352	0.749303	11	ANPEP;CMA1;MME;ACE;CES1
REACTOME_SYNTHESIS_OF_PIPS_AT_THE_GOLGI_MEMBRANE	0.809668	1	0.29864	0.748986	15	PI4KB;ARF3;PI4K2B
REACTOME_RHO_GTPASES_ACTIVATE_PAKS	0.821484	1	0.28474	0.74864	18	PAK1;MYH14;PAK3;CTTN;PPP1R12A;FLNA;MYH11;NF2
REACTOME_GLUTATHIONE_CONJUGATION	0.841984	1	0.263741	0.74859	25	GSTK1;GSTO1;OPLAH;MGST3;GCLC;GGCT;GSTA3;GSTM3;GSTZ1;CNDP2;GCLM;AKR1A1;GSS;ESD;GSTM4
REACTOME_AUTOPHAGY	0.964989	1	0.195895	0.746939	122	SRC;CSNK2A2;HDAC6;AMBRA1;VIM;RPTOR;SLC38A9;TSC1;PLIN2;HSPA8;RRAGA;PRKAA2;MTMR14;CHMP4C;ATG3;DYNC1H1;RRAGC;UBC;MVB12B;TUBB2B;ATG14;ARL13B;HSP90AA1;ATG9A;LAMP2;TUBA1A;TUBB3;ATG4D;TOMM20;DYNC1LI1;MTMR3;ATG16L1;CHMP3;UBE2V1;PRKAA1;CSNK2B;HSP90AB1;TUBB4B;VDAC1;ATG7;WDR45;RB1CC1;VCP;GABARAPL1;ATG4A;PRKAB2;PRKAG1;ATG4C
REACTOME_RNA_POLYMERASE_III_CHAIN_ELONGATION	0.821364	1	0.288332	0.746518	17	POLR3B;POLR3H;POLR1C;POLR3C;POLR2F;POLR3A;POLR1D
REACTOME_DOWNREGULATION_OF_SMAD2_3_SMAD4_TRANSCRIPTIONAL_ACTIVITY	0.831214	1	0.276666	0.745921	20	NEDD4L;USP9X;UBC;PPM1A;SKIL;SMAD2;SMURF2;UBE2D3;HDAC1
REACTOME_SYNTHESIS_SECRETION_AND_INACTIVATION_OF_GLUCAGON_LIKE_PEPTIDE_1_GLP_1	0.796201	1	0.329696	0.745064	10	GRP;FFAR4;DPP4;SEC11A
REACTOME_CTLA4_INHIBITORY_SIGNALING	0.828278	1	0.279685	0.744986	19	SRC;FYN;PPP2CB;PPP2R5D;YES1
REACTOME_GLYCOLYSIS	0.911313	1	0.220998	0.744642	57	PGM2L1;ALDOC;PPP2CB;PPP2R5D;NUP50;NUP88;NUP62;RAE1;ADPGK;NUP107;PFKL;NUP155;GPI;NUP188;PPP2R1A;PFKM;PRKACA;GAPDH;HK2;NUP35;NUP37;NUP85;PFKFB3;PFKP;PGP
REACTOME_SIGNALLING_TO_RAS	0.828237	1	0.282662	0.743178	18	SHC2;SRC;SOS1
REACTOME_CYTOSOLIC_SULFONATION_OF_SMALL_MOLECULES	0.801089	1	0.320678	0.743106	11	PAPSS2;SLC26A2;IMPAD1
REACTOME_MRNA_DECAY_BY_5_TO_3_EXORIBONUCLEASE	0.816774	1	0.296268	0.743037	15	XRN1;EDC4;DCP1B;DCP2;PATL1;LSM2
REACTOME_NEGATIVE_REGULATION_OF_FGFR1_SIGNALING	0.829388	1	0.28229	0.742198	18	SRC;PPP2CB;UBC;PPP2R1A;MKNK1;FGFR1;BRAF;SPRY2
REACTOME_MICRORNA_MIRNA_BIOGENESIS	0.853601	1	0.262351	0.737694	24	BCDIN3D;XPO5;DROSHA;PRKRA;DGCR8;POLR2B;POLR2F
REACTOME_SIGNALING_BY_WNT_IN_CANCER	0.864079	1	0.253295	0.737594	28	RNF43;PPP2CB;PPP2R5D;FZD8;FZD4;FZD6;AXIN1;PPP2R1A;PPP2R5B
REACTOME_CELL_DEATH_SIGNALLING_VIA_NRAGE_NRIF_AND_NADE	0.926853	1	0.214848	0.736946	63	NGEF;OBSCN;FGD2;ARHGEF15;SOS1;NCSTN;AKAP13;ARHGEF9
REACTOME_SHC_MEDIATED_CASCADE_FGFR4	0.806004	1	0.326005	0.736723	10	FGF16;SOS1;KRAS;HRAS
REACTOME_RIP_MEDIATED_NFKB_ACTIVATION_VIA_ZBP1	0.834423	1	0.284252	0.735955	17	RIPK3;CHUK;NFKB2;TICAM1
REACTOME_APC_CDC20_MEDIATED_DEGRADATION_OF_NEK2A	0.851297	1	0.268873	0.732968	21	BUB1B;CDC20;UBE2C;UBC;ANAPC10;ANAPC1;ANAPC7;ANAPC16;ANAPC4
REACTOME_REGULATION_OF_RUNX1_EXPRESSION_AND_ACTIVITY	0.838279	1	0.283013	0.732745	17	SRC;TNRC6A;CDK6
REACTOME_PI_METABOLISM	0.94209	1	0.207378	0.731851	74	PIK3C2B;PIK3CB;PI4KB;GDPD3;ARF3;PIP5K1A;BMX;MTMR1;MTMR2;PI4K2B;MTMR14
REACTOME_PTK6_REGULATES_RHO_GTPASES_RAS_GTPASE_AND_MAP_KINASES	0.820363	1	0.307833	0.729744	12	BCAR1;KRAS;HRAS;PXN;CRK;DOCK1;RHOA;ELMO2
REACTOME_GLUCOSE_METABOLISM	0.943049	1	0.208666	0.727309	69	PGM2L1;SLC37A4;ALDOC;PPP2CB;SLC37A1;PPP2R5D;NUP50;NUP88;NUP62;RAE1;GOT2;ADPGK;NUP107;PFKL;NUP155;GPI;NUP188;PPP2R1A;PFKM;PRKACA;GAPDH;MDH2;PCK2;HK2;NUP35;NUP37;NUP85;PFKFB3;SLC25A12;PFKP;PGP
REACTOME_COPI_MEDIATED_ANTEROGRADE_TRANSPORT	0.957985	1	0.201672	0.723657	82	CD59;ARF3;ACTR10;KDELR3;NAPB;ANK3;COG1;COG7;YKT6;COPB2;DYNC1H1;TUBB2B;GOLGB1;GOSR1;TUBA1A;BET1L;TUBB3;KDELR1;DCTN5;COG3;DYNC1LI1;GBF1;ARCN1;TUBB4B;NSF
REACTOME_PROTEIN_LOCALIZATION	0.98522	1	0.18611	0.722583	139	ABCD2;EPHX2;NOS2;PAOX;HMOX1;STX1A;GNPAT;CS;CMC4;USP9X;ACOX1;GSTK1;BAG6;UBE2J2;PRNP;LONP2;EHHADH;SLC25A17;BCS1L;LDHD;ECI2;TIMM10;UBC;CAT;PEX6;PHYH;PXMP4;COX19;PEX13;ACOT8;TIMM23;PEX7;EMD
REACTOME_RAB_REGULATION_OF_TRAFFICKING	0.975636	1	0.192106	0.720938	109	TBC1D25;MON1B;MON1A;TRAPPC12;TRAPPC11;RGP1;TRAPPC10;RAB38;TBC1D7;DENND4B;RAB3IP;TSC1;MADD
REACTOME_POST_TRANSLATIONAL_MODIFICATION_SYNTHESIS_OF_GPI_ANCHORED_PROTEINS	0.919284	1	0.222718	0.720844	46	NRN1;MSLN;CPM;PIGM;PIGB;PIGA;CD109
REACTOME_G_ALPHA_12_13_SIGNALLING_EVENTS	0.945731	1	0.208698	0.719628	65	NGEF;OBSCN;FGD2;ARHGEF15;BTK;SOS1;ADRA1B;AKAP13;ARHGEF9
REACTOME_UNFOLDED_PROTEIN_RESPONSE_UPR	0.960569	1	0.200547	0.718235	81	PDIA5;TSPYL2;KDELR3;DIS3;EIF2S2;HERPUD1;MBTPS2;WFS1;EDEM1;ASNS;HYOU1;CREBRF;PARN;DCP2;CREB3;KLHDC3;CXXC1;CREB3L2;DDIT3;PPP2R5B;CEBPG;CREB3L4;MBTPS1;DNAJB9;LMNA;HDGF;TATDN2;NFYB
REACTOME_FACTORS_INVOLVED_IN_MEGAKARYOCYTE_DEVELOPMENT_AND_PLATELET_PRODUCTION	0.974372	1	0.192616	0.717627	104	KIF16B;CENPE;PRKAR1B;CABLES1;KIF20B;KIF22;KIF9;KIF26B;KIF21A;MAFF;ZFPM1;KIF3B;KIF3A;KDM1A;SH2B1;DOCK10;KIF1A;AK3;AKAP10;TUBB2B;KIFAP3;MAFG;CABLES2;EHD1;RAB5A;DOCK4
REACTOME_SEROTONIN_NEUROTRANSMITTER_RELEASE_CYCLE	0.828492	1	0.317018	0.716412	10	SYN3;STX1A;PPFIA1
REACTOME_PHASE_II_CONJUGATION_OF_COMPOUNDS	0.93491	1	0.215654	0.714061	52	PAPSS2;N6AMT1;GSTK1;AHCY;GSTO1;ABHD10;OPLAH;MGST3;GCLC;GGCT;GSTA3;SLC26A2;MTR
REACTOME_PEROXISOMAL_PROTEIN_IMPORT	0.938107	1	0.214249	0.711944	53	EPHX2;NOS2;PAOX;GNPAT;USP9X;ACOX1;GSTK1;LONP2;EHHADH;ECI2;UBC;CAT;PEX6;PHYH;PEX13;ACOT8;PEX7
REACTOME_NUCLEAR_ENVELOPE_BREAKDOWN	0.929584	1	0.219048	0.711648	47	LPIN3;LMNB1;VRK2;NUP50;NUP88;LEMD2;LPIN1;NUP62;RAE1;NUP107;NUP155;NUP188;EMD;NUP35;LMNA;NUP37;NUP85
REACTOME_MITOTIC_METAPHASE_AND_ANAPHASE	0.99539	1	0.176118	0.711623	191	CENPE;CENPK;CENPM;MAD1L1;LMNB1;VRK2;BUB1B;CDC20;CENPQ;PPP2CB;PPP2R5D;UBE2C;ANKLE2;CC2D1B;LEMD2;CLIP1;CENPO;CHMP4C;VPS4A;NUP62;MIS12;PSMD12;AHCTF1;HDAC8;DYNC1H1;NUP107;NDE1;UBC;PSMD3;NUP155;PSMD8;ANAPC10;PSMD2;ZWINT;TUBB2B;NUP188;PPP2R1A;PDS5A;PSME1;PSMD4;PSMD11;PPP2R5B;PSMC4;EMD;PSMA5;ANAPC1;NUDC;TUBA1A;ANAPC7;TUBB3;CENPP;PSMD10;NUP35;NDEL1;LMNA;PSME4;DYNC1LI1;STAG2;NUP37;CHMP3;NUP85;PSMC6;PSMD13…
REACTOME_DEUBIQUITINATION	0.997671	1	0.173587	0.711329	216	USP28;SENP8;USP2;CCNA2;RNF135;STAM;KAT2A;OTUD3;STAMBPL1;UCHL1;USP13;TADA2B;MBD6;CDC20;USP33;USP9X;DDX58;TNIP2;RUVBL1;TGFBR1;INO80;IL33;TAB1;BARD1;CDC25A;AR;IFIH1;USP5;PSMD12;WDR48;SKP2;UBC;PSMD3;PSMD8;RNF123;USP34;PSMD2;AXIN1;USP3;USP4;OTUD7B;PSME1;POLB;MYSM1;PTEN;PSMD4;PSMD11;RAD23B;TRAF6;PSMC4;MUL1;PSMA5;ATXN7;INO80E;MCRS1;SMAD2;TOMM20;PSMD10;PSME4;SMURF2;SMAD7;BAP1;PSMC6;PSMD13;PSMD6;USP22;MAV…
REACTOME_MAP2K_AND_MAPK_ACTIVATION	0.909115	1	0.233526	0.709438	34	SRC;FN1;ITGA2B;VWF;KRAS;IQGAP1;HRAS;ACTG1;BRAF;MARK3;ITGB3
REACTOME_FRS_MEDIATED_FGFR1_SIGNALING	0.841081	1	0.305579	0.708117	11	FRS3;SOS1;KRAS;HRAS;FGFR1
REACTOME_ESR_MEDIATED_SIGNALING	0.990791	1	0.181708	0.707608	142	FKBP5;MMP3;MMP2;SRC;EREG;GTF2F1;GTF2F2;NRIP1;SPHK1;HSPB1;HBEGF;KDM4B;KPNA2
REACTOME_ACTIVATION_OF_AMPK_DOWNSTREAM_OF_NMDARS	0.874541	1	0.264932	0.705689	19	PRKAA2;MAPT;TUBB2B;TUBA1A;TUBB3;PRKAA1;TUBB4B;PRKAB2;PRKAG1;TUBB6
REACTOME_CASPASE_MEDIATED_CLEAVAGE_OF_CYTOSKELETAL_PROTEINS	0.845113	1	0.303693	0.703747	11	VIM;PLEC;MAPT;GSN;ADD1;SPTAN1
REACTOME_DEGRADATION_OF_DVL	0.941703	1	0.213323	0.703543	51	DVL3;DVL2;DVL1;PSMD12;UBC;PSMD3;PSMD8;PSMD2;PSME1;PSMD4;PSMD11;PSMC4;PSMA5;PSMD10;PSME4;PSMC6;PSMD13;PSMD6
REACTOME_RESOLUTION_OF_AP_SITES_VIA_THE_MULTIPLE_NUCLEOTIDE_PATCH_REPLACEMENT_PATHWAY	0.893466	1	0.249758	0.702284	24	RFC4;POLE;RPA1;PARG;APEX1;RFC5;POLB;POLD4
REACTOME_RHO_GTPASES_ACTIVATE_ROCKS	0.874884	1	0.266896	0.701726	18	PAK1;MYH14;ROCK2;PPP1R12A;LIMK2;ROCK1
REACTOME_ABORTIVE_ELONGATION_OF_HIV_1_TRANSCRIPT_IN_THE_ABSENCE_OF_TAT	0.893855	1	0.250588	0.698282	23	GTF2F1;GTF2F2;NCBP1;NCBP2
REACTOME_HSF1_DEPENDENT_TRANSACTIVATION	0.91334	1	0.234185	0.697397	31	HSPB1;CRYBA4;RPTOR;HSPA8;COL4A6;AKT1S1;HSPA1L;HSP90AA1;HSPH1;HSPA2;HSP90AB1;EP300;HSPB2;DEDD2
REACTOME_NEGATIVE_REGULATION_OF_MAPK_PATHWAY	0.925791	1	0.226272	0.696058	36	PAQR3;PPP2CB;PPP2R5D;DUSP10;DUSP2;DUSP6;KRAS;UBC;PPP2R1A;HRAS;PPP2R5B;BRAF;MARK3
REACTOME_SYNTHESIS_OF_ACTIVE_UBIQUITIN_ROLES_OF_E1_AND_E2_ENZYMES	0.908063	1	0.240613	0.69536	27	UBE2Q2;USP9X;UBE2C;USP5;UBC;UBE2Z;UBA6;UBE2A
REACTOME_TIE2_SIGNALING	0.883731	1	0.263774	0.693517	18	PIK3CB;SOS1;TEK;KRAS;HRAS;PIK3CA;ANGPT1;ANGPT4
REACTOME_MITOTIC_PROPHASE	0.971258	1	0.19636	0.691369	73	LPIN3;MASTL;LMNB1;VRK2;PPP2CB;NUP50;NUP88;LEMD2;LPIN1;NUP62;RAE1;NUP107;NUP155;NUP188;PPP2R1A;RB1;SMC4;EMD;NUP35;LMNA;NUP37;NUP85
REACTOME_ANTIGEN_PROCESSING_CROSS_PRESENTATION	0.980948	1	0.190809	0.691334	87	MRC2;FCGR1A;HLA-E;TLR4;BTK;LNPEP;SNAP23;PSMD12;CD14;ITGB5;UBC;PSMD3;PSMD8;CTSV;PSMD2;CHUK;PSME1;PSMD4;PSMD11;PSMC4;PSMA5;PSMD10;PSME4;ITGAV;PSMC6;PSMD13;PSMD6
REACTOME_RESPIRATORY_ELECTRON_TRANSPORT	0.978271	1	0.191781	0.691063	84	TIMMDC1;COQ10B;SCO1;COX18;NUBPL
REACTOME_NUCLEAR_ENVELOPE_NE_REASSEMBLY	0.966969	1	0.200039	0.689769	65	LMNB1;VRK2;ANKLE2;CC2D1B;LEMD2;CHMP4C;VPS4A;NUP62;AHCTF1;NUP107;NUP155;TUBB2B;NUP188;PPP2R1A;EMD;TUBA1A;TUBB3;NUP35;LMNA;NUP37;CHMP3;NUP85;SIRT2;LBR;PPP2R2A;TUBB4B
REACTOME_PROGRAMMED_CELL_DEATH	0.996407	1	0.175278	0.688864	152	DSP;PRKCQ;RIPK3;LMNB1;VIM;TLR4;TP53BP2;BMX;DFFA;DNM1L;DAPK2;PTK2;PSMD12;FADD;AVEN;CFLAR;CD14;PLEC;UBC;PSMD3;PSMD8;MAPT;PSMD2;MLKL;YWHAG;PSME1;PSMD4;PSMD11;DAPK3;PSMC4;PSMA5;E2F1;ROCK1;PSMD10;LMNA;STAT3;PSME4;AKT1;OPA1;PSMC6;PSMD13;PSMD6;DFFB
REACTOME_TCR_SIGNALING	0.987193	1	0.184749	0.687252	103	CARD11;PRKCQ;PIK3CB;PAK1;PTPRJ
REACTOME_GLUTATHIONE_SYNTHESIS_AND_RECYCLING	0.859639	1	0.303727	0.686377	10	OPLAH;GCLC;GGCT;CNDP2;GCLM;GSS
REACTOME_DISEASES_OF_SIGNAL_TRANSDUCTION_BY_GROWTH_FACTOR_RECEPTORS_AND_SECOND_MESSENGERS	0.999934	1	0.160896	0.685634	316	CLCN6;FGF16;PIK3CB;HGF;SPRED3;IRS2;SRC;DLL1;RNF43;HDAC6;PDGFRA;FN1;KAT2A;EREG;GTF2F1;PDGFB;FYN;GTF2F2;FGFR3;SPRED2;HBEGF;ITGA2B;SOS1;PPP2CB;CD19;PPP2R5D;FGF7;NCSTN;TRIM24;FZD8;GAB2;TGFBR1;MET;BTC;VWF;NCBP1;PSMD12;LRRFIP1;HDAC8;WDR48;KRAS;UBC;PSMD3;PSMD8;RICTOR;FZD4;PSMD2;FZD6;ERBB4;MAML1;NCBP2;FOXO3;AKT1S1;SND1;AXIN1;PTPN12;PPP2R1A;FGFR2;CHUK;HSP90AA1;PSME1;IQGAP1;KANK1;HRAS;PTEN;PSMD4;PSMD11;AGG…
REACTOME_CHROMOSOME_MAINTENANCE	0.961417	1	0.204005	0.685174	56	CENPK;CENPM;RFC4;CENPQ;MIS18A;RUVBL1;RPA1;CENPO
REACTOME_OTHER_SEMAPHORIN_INTERACTIONS	0.896822	1	0.258591	0.679889	18	TREM2;SEMA4A;SEMA7A;CD72
REACTOME_SEMAPHORIN_INTERACTIONS	0.967439	1	0.200934	0.679286	58	PAK1;TREM2;FYN;MYH14;SEMA4A;SEMA7A;FARP2;MET;CD72;RRAS;PAK3
REACTOME_REGULATION_OF_TLR_BY_ENDOGENOUS_LIGAND	0.874172	1	0.286142	0.678324	12	LBP;TLR4;CD14;SFTPA1
REACTOME_MRNA_CAPPING	0.927529	1	0.231154	0.678281	29	GTF2F1;GTF2F2;CDK7;MNAT1;NCBP1;RNGTT;NCBP2;ERCC3
REACTOME_CASPASE_ACTIVATION_VIA_DEATH_RECEPTORS_IN_THE_PRESENCE_OF_LIGAND	0.891531	1	0.26927	0.675325	15	TLR4;FADD;CFLAR;CD14
REACTOME_G_BETA_GAMMA_SIGNALLING_THROUGH_CDC42	0.885759	1	0.27793	0.672231	13	PAK1;GNG7;GNB4
REACTOME_APOPTOTIC_FACTOR_MEDIATED_RESPONSE	0.893515	1	0.27153	0.669471	14	AVEN;APIP;BAK1;APAF1;UACA;C1QBP;DIABLO;CYCS;MAPK3;MAPK1;BAX;CASP7;CASP9;XIAP
REACTOME_RAF_ACTIVATION	0.934649	1	0.229942	0.66452	27	SRC;PPP2CB;PPP2R5D;KRAS;PPP2R1A;HRAS;PPP2R5B;BRAF;MAP3K11;MARK3
REACTOME_SIGNAL_REGULATORY_PROTEIN_FAMILY_INTERACTIONS	0.887247	1	0.280255	0.664368	12	SRC;PTK2;SFTPA1;CD47
REACTOME_TAK1_ACTIVATES_NFKB_BY_PHOSPHORYLATION_AND_ACTIVATION_OF_IKKS_COMPLEX	0.931228	1	0.233111	0.661652	25	TAB3;AGER;TAB1;UBC;CHUK;TRAF6;UBE2V1;APP;NFKB2
REACTOME_DOWNREGULATION_OF_TGF_BETA_RECEPTOR_SIGNALING	0.927326	1	0.23701	0.660446	23	NEDD4L;PMEPA1;TGFBR1;UBC;SMAD2;SMURF2;SMAD7
REACTOME_SEPARATION_OF_SISTER_CHROMATIDS	0.998503	1	0.168154	0.659114	149	CENPE;CENPK;CENPM;MAD1L1;BUB1B;CDC20;CENPQ;PPP2CB;PPP2R5D;UBE2C;CLIP1;CENPO;MIS12;PSMD12;AHCTF1;HDAC8;DYNC1H1;NUP107;NDE1;UBC;PSMD3;PSMD8;ANAPC10;PSMD2;ZWINT;TUBB2B;PPP2R1A;PDS5A;PSME1;PSMD4;PSMD11;PPP2R5B;PSMC4;PSMA5;ANAPC1;NUDC;TUBA1A;ANAPC7;TUBB3;CENPP;PSMD10;NDEL1;PSME4;DYNC1LI1;STAG2;NUP37;NUP85;PSMC6;PSMD13;PSMD6;CENPL;TUBB4B;PAFAH1B1;ANAPC16
REACTOME_WNT5A_DEPENDENT_INTERNALIZATION_OF_FZD2_FZD5_AND_ROR2	0.893165	1	0.277436	0.657686	12	ROR2;ROR1;AP2A1;CLTA
REACTOME_DISEASES_ASSOCIATED_WITH_GLYCOSYLATION_PRECURSOR_BIOSYNTHESIS	0.918363	1	0.249435	0.655816	18	GNE;DOLK;PGM1;DPM2
REACTOME_INHIBITION_OF_THE_PROTEOLYTIC_ACTIVITY_OF_APC_C_REQUIRED_FOR_THE_ONSET_OF_ANAPHASE_BY_MITOTIC_SPINDLE_CHECKPOINT_COMPONENTS	0.92135	1	0.24575	0.654593	19	BUB1B;CDC20;UBE2C;ANAPC10;ANAPC1;ANAPC7;ANAPC16;ANAPC4
REACTOME_SIGNALING_BY_TGF_BETA_FAMILY_MEMBERS	0.992313	1	0.179903	0.653044	88	FST;CGN;SERPINE1;BMP2;NEDD4L;CHRDL1;USP9X;PMEPA1;MEN1;TGFBR1
REACTOME_SIGNALING_BY_MODERATE_KINASE_ACTIVITY_BRAF_MUTANTS	0.959049	1	0.210995	0.652842	37	SRC;FN1;ITGA2B;VWF;KRAS;IQGAP1;HRAS;ACTG1;BRAF;MAP3K11;MARK3;ITGB3
REACTOME_MRNA_SPLICING_MINOR_PATHWAY	0.971654	1	0.19992	0.652124	48	SNRNP35;GTF2F1;GTF2F2;SNRNP40;NCBP1;SF3B2;SF3B3;NCBP2
REACTOME_METABOLISM_OF_POLYAMINES	0.977088	1	0.195926	0.651057	53	PAOX;ODC1;PSMD12;PSMD3;PSMD8;PSMD2;PSME1;NQO1;PSMD4;PSMD11;PSMC4;PSMA5;PSMD10;SMS;PSME4;PSMC6;PSMD13;PSMD6
REACTOME_METAL_ION_SLC_TRANSPORTERS	0.934333	1	0.236586	0.644952	21	SLC39A4;SLC39A2;SLC41A1;SLC39A7;SLC39A14;SLC30A1
REACTOME_TNF_RECEPTOR_SUPERFAMILY_TNFSF_MEMBERS_MEDIATING_NON_CANONICAL_NF_KB_PATHWAY	0.916727	1	0.260756	0.642907	14	LTA;TNFSF13B;TNFRSF12A
REACTOME_DEADENYLATION_DEPENDENT_MRNA_DECAY	0.978462	1	0.19393	0.642131	52	PAN2;XRN1;DIS3;EDC4;DCP1B;CNOT3;CNOT10;SKIV2L;PARN;DCP2;EIF4B;WDR61;PAIP1;PATL1;EIF4A1;EIF4A2;LSM2;CNOT4;HBS1L;EXOSC2;TNKS1BP1;CNOT2;EIF4A3
REACTOME_SELECTIVE_AUTOPHAGY	0.986858	1	0.18641	0.637721	62	SRC;CSNK2A2;HDAC6;VIM;PLIN2;HSPA8;PRKAA2;DYNC1H1;UBC;TUBB2B;ARL13B;HSP90AA1;TUBA1A;TUBB3;TOMM20;DYNC1LI1;UBE2V1;CSNK2B;TUBB4B;VDAC1
REACTOME_FOXO_MEDIATED_TRANSCRIPTION_OF_CELL_DEATH_GENES	0.928911	1	0.248669	0.633947	16	CITED2;BCL6;FOXO3;DDIT3;NFYB;EP300
REACTOME_NEUREXINS_AND_NEUROLIGINS	0.94998	1	0.225053	0.632816	24	STX1A;NLGN2;SHANK1;PDLIM5;SHARPIN;CASK;DLGAP4
REACTOME_PCP_CE_PATHWAY	0.994936	1	0.175194	0.631291	84	ROR2;DVL3;DVL2;DVL1;FZD8;PSMD12;ROR1;UBC;PSMD3;PSMD8;AP2A1;FZD4;PSMD2;FZD6;PSME1;PSMD4;PSMD11;PSMC4;PSMA5;PSMD10;CLTA;PSME4;SMURF2;PSMC6;PSMD13;PSMD6
REACTOME_AUF1_HNRNP_D0_BINDS_AND_DESTABILIZES_MRNA	0.982601	1	0.191875	0.630697	50	HSPB1;HSPA8;PSMD12;UBC;PSMD3;PSMD8;PSMD2;PSME1;PSMD4;PSMD11;PSMC4;PSMA5;PSMD10;PSME4;PSMC6;PSMD13;PSMD6
REACTOME_SIGNALING_BY_NODAL	0.921805	1	0.260319	0.629635	13	TDGF1;PCSK6;ACVR1B;FOXO3
REACTOME_CYTOCHROME_C_MEDIATED_APOPTOTIC_RESPONSE	0.913672	1	0.271461	0.629057	11	AVEN;APIP;APAF1;UACA;DIABLO;CYCS;MAPK3;MAPK1;CASP7;CASP9;XIAP
REACTOME_TRANSCRIPTION_COUPLED_NUCLEOTIDE_EXCISION_REPAIR_TC_NER	0.992681	1	0.178649	0.62731	72	RFC4;COPS7B;POLE;XRCC1;AQR;POLK;CDK7;MNAT1;RPA1
REACTOME_TP53_REGULATES_TRANSCRIPTION_OF_ADDITIONAL_CELL_CYCLE_GENES_WHOSE_EXACT_ROLE_IN_THE_P53_PATHWAY_REMAIN_UNCERTAIN	0.942025	1	0.234757	0.625314	19	CENPJ;RGCC;CNOT3;CNOT10;PLK2;PLK3;PLAGL1;NPM1;CNOT4;TNKS1BP1;CNOT2
REACTOME_ESTROGEN_DEPENDENT_NUCLEAR_EVENTS_DOWNSTREAM_OF_ESR_MEMBRANE_SIGNALING	0.948025	1	0.229122	0.624604	21	EREG;HBEGF;BTC;PTK2;FOXO3
REACTOME_VIRAL_MESSENGER_RNA_SYNTHESIS	0.977193	1	0.198897	0.622042	39	GTF2F1;GTF2F2;NUP50;NUP88;NUP62;RAE1;NUP107;NUP155;NUP188
REACTOME_MEIOTIC_SYNAPSIS	0.95409	1	0.224679	0.619369	22	LMNB1;ATR;SYNE2;ACD;LMNA;STAG2;HSPA2;SYNE1;DIDO1
REACTOME_RESPIRATORY_ELECTRON_TRANSPORT_ATP_SYNTHESIS_BY_CHEMIOSMOTIC_COUPLING_AND_HEAT_PRODUCTION_BY_UNCOUPLING_PROTEINS	0.99681	1	0.170901	0.619201	87	TIMMDC1;COQ10B;SCO1;SLC25A14;COX18;NUBPL
REACTOME_IRON_UPTAKE_AND_TRANSPORT	0.987135	1	0.186648	0.615568	51	ATP6V0D2;CYBRD1;HMOX1;ACO1;MCOLN1;FLVCR1;CAND1;FBXL5
REACTOME_TRNA_PROCESSING	0.997951	1	0.167101	0.61358	94	POP4;WDR4;TYW1;THADA;RPP38;GTPBP3;TYW5;NUP50;NUP88;TRMT1;NUP62;ADAT3;ADAT2;RAE1;NUP107;TRMT6;NUP155;TRMT12;NSUN2;TYW3;RPP30;NUP188;NSUN6;RTCB;TRMT11;LCMT2
REACTOME_HIV_ELONGATION_ARREST_AND_RECOVERY	0.969482	1	0.208825	0.612759	29	GTF2F1;GTF2F2
REACTOME_SIGNALING_BY_NTRK3_TRKC	0.947479	1	0.236114	0.61132	17	SRC;SOS1;KRAS;HRAS;PIK3CA;PTPRS;PLCG1
REACTOME_REGULATION_OF_GENE_EXPRESSION_IN_LATE_STAGE_BRANCHING_MORPHOGENESIS_PANCREATIC_BUD_PRECURSOR_CELLS	0.925938	1	0.26873	0.60729	10	KAT2A;MAML1;EP300
REACTOME_EPIGENETIC_REGULATION_OF_GENE_EXPRESSION	0.99763	1	0.168437	0.606943	84	POLR1B;DNMT3B;KAT2A;DDX21;MTF2;CD3EAP;EZH2;CDK7;MNAT1
REACTOME_SYNTHESIS_OF_SUBSTRATES_IN_N_GLYCAN_BIOSYTHESIS	0.991853	1	0.180365	0.603808	55	ST6GALNAC3;ST8SIA2;RENBP;GNE;NEU3;SLC35C1;DOLK;GMDS;DPM2;NAGK;FPGT;ST8SIA6;UAP1
REACTOME_CYCLIN_D_ASSOCIATED_EVENTS_IN_G1	0.984355	1	0.19244	0.595431	37	SRC;PPP2CB;CDK7;MNAT1;E2F3;SKP2;UBC;PPP2R1A;RB1;CDK6
REACTOME_INTERLEUKIN_12_FAMILY_SIGNALING	0.989257	1	0.184465	0.594518	45	EBI3;LMNB1;VAMP7;TCP1;GSTO1
REACTOME_RNA_POLYMERASE_III_TRANSCRIPTION_TERMINATION	0.966782	1	0.214897	0.592404	22	POLR3B;POLR3H;POLR1C;POLR3C
REACTOME_PTEN_REGULATION	0.999772	1	0.15282	0.587714	130	CSNK2A2;OTUD3;USP13;PHC1;RPTOR;SLC38A9;EZH2;EGR1;RRAGA;KDM1A;PSMD12;FRK;RRAGC;UBC;PSMD3;PSMD8;PSMD2;ATN1;TNRC6A;PSME1;PTEN;PSMD4;PSMD11;TRIM27;PSMC4;REST;PSMA5;HDAC2;HDAC5;PSMD10;RBBP4;PSME4;AKT1;PSMC6;CSNK2B;PSMD13;PSMD6
REACTOME_GLOBAL_GENOME_NUCLEOTIDE_EXCISION_REPAIR_GG_NER	0.998253	1	0.164663	0.587487	79	RFC4;COPS7B;POLE;XRCC1;POLK;CDK7;MNAT1;RUVBL1;RPA1;INO80;USP45
REACTOME_DOPAMINE_NEUROTRANSMITTER_RELEASE_CYCLE	0.953197	1	0.238205	0.587306	14	SYN3;STX1A;CASK;PPFIA1
REACTOME_APC_C_CDH1_MEDIATED_DEGRADATION_OF_CDC20_AND_OTHER_APC_C_CDH1_TARGETED_PROTEINS_IN_LATE_MITOSIS_EARLY_G1	0.996924	1	0.169249	0.583599	65	CDC20;UBE2C;PSMD12;SKP2;UBC;PSMD3;PSMD8;ANAPC10;PSMD2;PSME1;PSMD4;PSMD11;PSMC4;PSMA5;ANAPC1;ANAPC7;PSMD10;PSME4;PSMC6;PSMD13;PSMD6
REACTOME_REGULATION_OF_EXPRESSION_OF_SLITS_AND_ROBOS	0.999965	1	0.149214	0.58048	141	ROBO1;USP33;MAGOHB;COL4A5;SLIT2;NCBP1;ETF1;PSMD12;ZSWIM8;UBC;PSMD3;PSMD8;PSMD2;CASC3;NCBP2;GSPT1;PSME1;PSMD4;PSMD11;PSMC4;PSMA5;PSMD10;RPL10A;PSME4;PSMC6;PSMD13;PSMD6
REACTOME_INTERACTIONS_OF_VPR_WITH_HOST_CELLULAR_PROTEINS	0.983489	1	0.193305	0.575659	31	HMGA1;NUP50;NUP88;NUP62;RAE1;NUP107;NUP155;NUP188;NUP35;NUP37;NUP85;PSIP1
REACTOME_TRANSCRIPTIONAL_REGULATION_BY_RUNX3	0.999191	1	0.159184	0.575415	86	SRC;KAT2A;SPP1;PSMD12;KRAS;UBC;PSMD3;PSMD8;PSMD2;MAML1;FOXO3;PSME1;PSMD4;PSMD11;PSMC4;PSMA5;RUNX3;PSMD10;SMURF2;PSMC6;PSMD13;PSMD6;WWTR1;EP300
REACTOME_PLASMA_LIPOPROTEIN_ASSEMBLY	0.94751	1	0.253433	0.57272	10	APOA2;BMP1;PRKACA;PRKACB
REACTOME_GENE_SILENCING_BY_RNA	0.996793	1	0.168767	0.57054	58	BCDIN3D;XPO5;NUP50;NUP88;NUP62;RAE1;NUP107;NUP155;DROSHA;NUP188;TNRC6A;HSP90AA1;PRKRA;DGCR8;NUP35;NUP37;NUP85
REACTOME_RUNX3_REGULATES_NOTCH_SIGNALING	0.95856	1	0.237982	0.564156	12	KAT2A;MAML1;RUNX3;EP300
REACTOME_N_GLYCAN_ANTENNAE_ELONGATION	0.961284	1	0.233244	0.564147	13	ST8SIA2;MGAT4A;MGAT5;ST8SIA6;ST3GAL4
REACTOME_SIGNALING_BY_CYTOSOLIC_FGFR1_FUSION_MUTANTS	0.968247	1	0.220873	0.563086	16	TRIM24;GAB2;LRRFIP1;PIK3CA;STAT3
REACTOME_CASPASE_ACTIVATION_VIA_EXTRINSIC_APOPTOTIC_SIGNALLING_PATHWAY	0.978194	1	0.203628	0.561339	22	TLR4;DAPK2;FADD;CFLAR;CD14
REACTOME_CYCLIN_A_CDK2_ASSOCIATED_EVENTS_AT_S_PHASE_ENTRY	0.999351	1	0.157124	0.559324	78	CCNA2;CABLES1;CDK7;MNAT1;CDC25A;PSMD12;SKP2;UBC;PSMD3;PSMD8;PSMD2;RB1;PSME1;PSMD4;PSMD11;PSMC4;PSMA5;E2F1;PSMD10;RBBP4;AKT1;PSMC6;PSMD13;PSMD6
REACTOME_TRISTETRAPROLIN_TTP_ZFP36_BINDS_AND_DESTABILIZES_MRNA	0.970389	1	0.218768	0.557718	16	XRN1;DIS3;DCP2
REACTOME_GAP_JUNCTION_TRAFFICKING_AND_REGULATION	0.986343	1	0.192618	0.556656	27	SRC;TUBB2B;DAB2;TUBA1A;TUBB3;ACTG1;CLTA;TUBB4B;MYO6;CLTC;TUBB6;GJC1
REACTOME_AMYLOID_FIBER_FORMATION	0.988546	1	0.187559	0.554477	30	TSPAN5;USP9X;MFGE8;NCSTN;UBC;TSPAN14;HSPG2;APP;SIAH2;GSN
REACTOME_INFLAMMASOMES	0.975601	1	0.212904	0.551226	17	AIM2;HSP90AB1;APP;NFKB2
REACTOME_ATF4_ACTIVATES_GENES_IN_RESPONSE_TO_ENDOPLASMIC_RETICULUM_STRESS	0.982522	1	0.197656	0.550784	23	DIS3;HERPUD1;ASNS;PARN;DCP2;DDIT3;CEBPG;NFYB;ATF6
REACTOME_THE_ROLE_OF_GTSE1_IN_G2_M_PROGRESSION_AFTER_G2_CHECKPOINT	0.998889	1	0.159161	0.550231	66	GTSE1;FKBPL;PSMD12;UBC;PSMD3;PSMD8;PSMD2;TUBB2B;HSP90AA1;PSME1;PSMD4;PSMD11;PSMC4;PSMA5;TUBA1A;TUBB3;PSMD10;PSME4;PSMC6;PSMD13;PSMD6;HSP90AB1;TUBB4B
REACTOME_NOTCH4_ACTIVATION_AND_TRANSMISSION_OF_SIGNAL_TO_THE_NUCLEUS	0.965453	1	0.234162	0.542624	11	NCSTN;NOTCH4;PSEN2;ADAM10;JAG1
REACTOME_SIGNALING_BY_FGFR1_IN_DISEASE	0.989506	1	0.186254	0.542373	28	SOS1;TRIM24;GAB2;LRRFIP1;KRAS;HRAS;FGFR1;PIK3CA;STAT3;ERLIN2;PLCG1
REACTOME_PHOSPHORYLATION_SITE_MUTANTS_OF_CTNNB1_ARE_NOT_TARGETED_TO_THE_PROTEASOME_BY_THE_DESTRUCTION_COMPLEX	0.974148	1	0.217887	0.537211	14	PPP2CB;PPP2R5D;AXIN1;PPP2R1A;PPP2R5B
REACTOME_IRE1ALPHA_ACTIVATES_CHAPERONES	0.997406	1	0.165777	0.53429	45	PDIA5;TSPYL2;KDELR3;WFS1;EDEM1;HYOU1;KLHDC3;CXXC1;PPP2R5B;DNAJB9;LMNA;HDGF;TATDN2
REACTOME_ALPHA_LINOLENIC_OMEGA3_AND_LINOLEIC_OMEGA6_ACID_METABOLISM	0.969925	1	0.229654	0.532176	11	ACOX1;ACSL1;ACOT8;HSD17B4
REACTOME_PEROXISOMAL_LIPID_METABOLISM	0.989227	1	0.18783	0.528151	24	ACOX1;EHHADH;SLC25A17;ECI2;PHYH;ACOT8
REACTOME_TGF_BETA_RECEPTOR_SIGNALING_ACTIVATES_SMADS	0.993061	1	0.179815	0.527636	29	NEDD4L;PMEPA1;TGFBR1;UBC;UBE2M;SMAD2;SMURF2;SMAD7
REACTOME_TRANSCRIPTIONAL_ACTIVITY_OF_SMAD2_SMAD3_SMAD4_HETEROTRIMER	0.997198	1	0.166882	0.521916	39	SERPINE1;NEDD4L;USP9X;MEN1;UBC;PPM1A;CCNT1;SKIL;SMAD2;SMURF2;SMAD7;WWTR1
REACTOME_ER_TO_GOLGI_ANTEROGRADE_TRANSPORT	0.999982	1	0.135643	0.519775	126	F5;CD59;TRAPPC10;ARF3;ACTR10;KDELR3;NAPB;ANK3;COG1;COG7;YKT6;COPB2;DYNC1H1;TUBB2B;SEC24D;GOLGB1;CNIH1;GOSR1;TUBA1A;BET1L;TRAPPC6A;TUBB3;KDELR1;TFG;DCTN5;COG3;DYNC1LI1;GBF1;ARCN1;TUBB4B;NSF
REACTOME_RESPONSE_OF_MTB_TO_PHAGOCYTOSIS	0.987832	1	0.19237	0.51865	20	NOS2;UBC;RAB5A;TRIM27;SFPQ
REACTOME_REGULATION_BY_C_FLIP	0.974213	1	0.228508	0.516394	10	FADD;CFLAR
REACTOME_APC_C_CDC20_MEDIATED_DEGRADATION_OF_CYCLIN_B	0.988586	1	0.191094	0.515211	20	CDC20;UBE2C;UBC;ANAPC10;ANAPC1;ANAPC7;ANAPC16;ANAPC4
REACTOME_SIGNALING_BY_TGF_BETA_RECEPTOR_COMPLEX	0.999582	1	0.148183	0.51387	67	CGN;SERPINE1;NEDD4L;USP9X;PMEPA1;MEN1;TGFBR1;UBC;PPM1A;CCNT1;SKIL;UBE2M
REACTOME_DISEASES_OF_CARBOHYDRATE_METABOLISM	0.994064	1	0.176862	0.506827	26	SLC37A4;GALNS;GAA;GBE1;UBC
REACTOME_ASYMMETRIC_LOCALIZATION_OF_PCP_PROTEINS	0.999581	1	0.148899	0.504912	59	DVL2;FZD8;PSMD12;UBC;PSMD3;PSMD8;FZD4;PSMD2;PSME1;PSMD4;PSMD11;PSMC4;PSMA5;PSMD10;PSME4;SMURF2;PSMC6;PSMD13;PSMD6
REACTOME_INFECTION_WITH_MYCOBACTERIUM_TUBERCULOSIS	0.992633	1	0.180309	0.502446	23	NOS2;UBC;RAB5A;TRIM27;SFPQ
REACTOME_NEGATIVE_REGULATORS_OF_DDX58_IFIH1_SIGNALING	0.996307	1	0.171047	0.501906	29	RNF135;DDX58;IFIH1;UBC;IKBKE
REACTOME_BUTYRATE_RESPONSE_FACTOR_1_BRF1_BINDS_AND_DESTABILIZES_MRNA	0.988247	1	0.194375	0.495532	16	XRN1;DIS3;DCP2;AKT1
REACTOME_GENE_AND_PROTEIN_EXPRESSION_BY_JAK_STAT_SIGNALING_AFTER_INTERLEUKIN_12_STIMULATION	0.997071	1	0.165008	0.49139	31	LMNB1;TCP1;GSTO1;STAT4;HNRNPDL;ANXA2;RALA;HNRNPF;PPIA;PAK2;SOD2;HSPA9;ARF1;MIF;RPLP0;HNRNPA2B1;PITPNA;CFL1;PDCD4;MSN;CNN2;CAPZA1;LCP1;SOD1;RAP1B;PSME2;TALDO1;SNRPA1;MTAP;SERPINB2;AIP
REACTOME_FGFR1_MUTANT_RECEPTOR_ACTIVATION	0.993607	1	0.178004	0.485254	21	TRIM24;GAB2;LRRFIP1;FGFR1;PIK3CA;STAT3;ERLIN2
REACTOME_PROTEIN_UBIQUITINATION	0.999836	1	0.143003	0.484919	59	UBE2Q2;RAD18;USP9X;UBE2C;UBE2J2;PAF1;RRAGA;USP5
REACTOME_PERK_REGULATES_GENE_EXPRESSION	0.997983	1	0.160333	0.46689	28	DIS3;EIF2S2;HERPUD1;ASNS;PARN;DCP2;DDIT3;CEBPG;NFYB;ATF6
REACTOME_DNA_DAMAGE_RECOGNITION_IN_GG_NER	0.999366	1	0.147731	0.448797	34	COPS7B;RUVBL1;INO80;DDB1;UBC;XPC;RAD23B;INO80E;MCRS1
REACTOME_REGULATION_OF_PYRUVATE_DEHYDROGENASE_PDH_COMPLEX	0.995793	1	0.175359	0.439798	15	PPARD;PDPR;PDHX;PDHA1;GSTZ1;DLAT
REACTOME_PROCESSING_OF_INTRONLESS_PRE_MRNAS	0.998472	1	0.159319	0.418882	18	CPSF2;NCBP1;PCF11;NCBP2;CPSF4;PABPN1;CSTF1;WDR33
REACTOME_ATF6_ATF6_ALPHA_ACTIVATES_CHAPERONES	0.99916	1	0.163668	0.387988	12	MBTPS2;DDIT3;MBTPS1;NFYB;ATF6
REACTOME_INFLUENZA_INFECTION	1	1	0.0754782	0.290141	129	GTF2F1;GTF2F2;KPNA2;NUP50;NUP88;NUP62;RAE1;NUP107;NUP155;NUP188;HSP90AA1;NUP35;RPL10A;CLTA;CPSF4;NUP37;NUP85
REACTOME_MITOCHONDRIAL_PROTEIN_IMPORT	1	1	-0.114438	-0.394175	56	TIMM8A;PITRM1;TIMM50;CMC2;CHCHD3;CHCHD4;TIMM22;FXN;TIMM10B;TOMM6;GFER;CYC1;CHCHD2;TOMM40;MTX1;TOMM7;CHCHD10;TIMM13;COA4;TAZ;COX17;MTX2;GRPEL1
REACTOME_TRANSLATION	1	1	-0.0938378	-0.404475	251	SARS2;NARS2;GFM2;SEC61A2;MRPL9;MRPL53;MTFMT;GSPT2;MRPL39;SRPRB;MRPL34;PARS2;MRPS18A;SSR3;MRPS2;MRPS7;MRPL1;MRPS28;EIF4E;TRAM1;MTIF3;MRPL41;SEC61B;MRPL2;MRPL21;MRPS12;MRPL16;PPA2;MRPL18;MRPL11;EIF2B1;WARS2;CARS2;MRPL20;MRPL12;TSFM;SPCS3;MRPS26;MRPL13;SSR1;EIF3G;MRPS33;MRPS11;RARS2;MRPL14;MRRF;SRP19;MRPS14;MRPL36;MRPL49;RPS19;CHCHD1;MRPL32;MRPL15;MRPS21;RPL4;APEH;RPL37;EIF2S1;RPL13;MTRF1L;MRPL17;RP…
REACTOME_CELLULAR_RESPONSE_TO_HYPOXIA	1	1	-0.121976	-0.434718	67	PSMA8
REACTOME_PROCESSING_AND_ACTIVATION_OF_SUMO	0.992832	1	-0.19511	-0.446681	10	SENP1;SUMO1;SUMO2;SUMO3;SAE1;UBA2;UBE2I;RWDD3;SENP2;SENP5
REACTOME_MRNA_DECAY_BY_3_TO_5_EXORIBONUCLEASE	0.994368	1	-0.177529	-0.452908	15	EXOSC1;DCPS;EXOSC4;EXOSC3;TTC37;EXOSC5
REACTOME_SIGNALING_BY_NOTCH4	0.999978	1	-0.127956	-0.465331	75	TACC3;NOTCH2;KAT2B;HEY1;HEY2;PSEN1;PSME3;SMAD3;PSENEN;PSMB10;NOTCH1;SKP1;FBXW7;RBPJ;PSMF1;PSMD5;MAML3;PSME2;HES1
REACTOME_INSULIN_RECEPTOR_RECYCLING	0.996062	1	-0.168291	-0.468267	21	ATP6V1G2;ATP6V0C;TCIRG1;ATP6V1H;ATP6V0D1;ATP6V1C1;ATP6V1E1;ATP6V0B;ATP6V0E1;ATP6V1D
REACTOME_HDACS_DEACETYLATE_HISTONES	0.998427	1	-0.154972	-0.472398	31	SAP30;HDAC10
REACTOME_RHO_GTPASES_ACTIVATE_IQGAPS	0.995487	1	-0.170699	-0.474968	21	IQGAP2
REACTOME_INCRETIN_SYNTHESIS_SECRETION_AND_INACTIVATION	0.986532	1	-0.204976	-0.481748	11	GATA4;SPCS3;TCF7L2;SEC11C;CTNNB1;SPCS1;SPCS2;SEC11A;DPP4;FFAR4;GRP
REACTOME_NR1H2_AND_NR1H3_MEDIATED_SIGNALING	0.998381	1	-0.156007	-0.482332	33	NR1H3;ABCA1;MYLIP;APOE;AGO1;TNRC6C;NCOA1;TBL1XR1;NCOR1;ABCG1;FASN;HDAC3
REACTOME_REGULATION_OF_MRNA_STABILITY_BY_PROTEINS_THAT_BIND_AU_RICH_ELEMENTS	1	1	-0.132627	-0.486558	79	PSMA8;MAPK11
REACTOME_DEGRADATION_OF_BETA_CATENIN_BY_THE_DESTRUCTION_COMPLEX	0.999865	1	-0.134501	-0.490296	76	PSMA8;LEF1;APC;TLE3
REACTOME_DEACTIVATION_OF_THE_BETA_CATENIN_TRANSACTIVATING_COMPLEX	0.997863	1	-0.159103	-0.498491	35	LEF1;APC;TLE3;RBBP5;TLE2;BCL9;XPO1;CTNNBIP1;XIAP;CTBP1;BCL9L;KMT2D;TCF7L2
REACTOME_E3_UBIQUITIN_LIGASES_UBIQUITINATE_TARGET_PROTEINS	0.998413	1	-0.15662	-0.504786	40	LEO1;HLTF;RNF20;SHPRH;PEX10;PEX12;PEX5;UBE2E1;CTR9;PCNA;UBE2D1;UBE2D2;WAC;BCL10;UBE2L3
REACTOME_RNA_POLYMERASE_III_TRANSCRIPTION_INITIATION_FROM_TYPE_3_PROMOTER	0.99475	1	-0.171387	-0.505792	27	SNAPC4;SNAPC1;POLR3K;TBP;BDP1;POLR3E;POLR2E;SNAPC5
REACTOME_PROSTACYCLIN_SIGNALLING_THROUGH_PROSTACYCLIN_RECEPTOR	0.980891	1	-0.207621	-0.510576	13	GNG2;GNG12;GNB1;GNG8;GNG11;GNG10
REACTOME_NONSENSE_MEDIATED_DECAY_NMD	0.999977	1	-0.134731	-0.51219	98	GSPT2;SMG9;UPF2;UPF3A;SMG6;SMG7;RPS19;UPF1;RPL4;RPL37;RPL13;RPL35;PNRC2;RPL38;RPL19;UPF3B;RPS29;RPS21;RPS26;RPS28;RPL35A;RPS23;RPS16;RPS6;RPL9;RPS8;PABPC1;RPS3;RPL37A;RPS9;RPS18;RPL8;RPL5;RPSA;RPL13A;RPL26;RPS5;RPL12;RPLP2;RPS27A;RPL27;RPS10;RPL14;RPL24;RPS11;RPS24;RPL36AL;RNPS1;RPL30;SMG1;RPS13;RPL23;RPL31;MAGOH;RPL18;RPLP0;RPS15;RPL17;RPS27L;RPS15A;RPS14;RPL18A;RPS17;RPL21;RPL11;RPL7;RPL27A;RPS…
REACTOME_HCMV_LATE_EVENTS	0.998507	1	-0.157996	-0.523589	46	NDC1;VPS37C;NUP93;NUP54
REACTOME_TRANSPORT_OF_CONNEXONS_TO_THE_PLASMA_MEMBRANE	0.973201	1	-0.220703	-0.531177	12	TUBB1;TUBA4A;TUBA1B;GJA1;TUBB4A;TUBA1C;TUBB2A;TUBB6;TUBB4B;TUBB3;TUBA1A;TUBB2B
REACTOME_APC_C_MEDIATED_DEGRADATION_OF_CELL_CYCLE_PROTEINS	0.999775	1	-0.146558	-0.535377	77	PSMA8;CDK2;CDC14A;CDC23;MAD2L1;CDK1
REACTOME_SUMOYLATION_OF_SUMOYLATION_PROTEINS	0.991659	1	-0.179352	-0.54283	30	NDC1;NUP93;NUP54;AAAS;NUP43;NUP133
REACTOME_SCF_SKP2_MEDIATED_DEGRADATION_OF_P27_P21	0.998365	1	-0.158497	-0.544144	55	CCNE1;CDK2;CCNE2
REACTOME_MITOCHONDRIAL_CALCIUM_ION_TRANSPORT	0.979919	1	-0.201974	-0.554783	20	SLC8B1
REACTOME_PINK_PARKIN_MEDIATED_MITOPHAGY	0.970181	1	-0.216171	-0.561103	16	ATG12
REACTOME_KSRP_KHSRP_BINDS_AND_DESTABILIZES_MRNA	0.968297	1	-0.217679	-0.565018	16	MAPK11
REACTOME_PHOSPHORYLATION_OF_THE_APC_C	0.967445	1	-0.217047	-0.572153	17	CDC23;CDK1;CCNB1
REACTOME_REGULATION_OF_RAS_BY_GAPS	0.997696	1	-0.163096	-0.572904	62	PSMA8;SYNGAP1
REACTOME_POST_CHAPERONIN_TUBULIN_FOLDING_PATHWAY	0.96288	1	-0.220797	-0.582038	17	TUBB1;TBCE;TUBA4A;TBCB;TUBA1B;TBCC;TBCA;ARL2;TUBB4A;TUBA1C;TUBB2A;TUBB6;TBCD;TUBB4B;TUBB3;TUBA1A;TUBB2B
REACTOME_REGULATION_OF_GLUCOKINASE_BY_GLUCOKINASE_REGULATORY_PROTEIN	0.976557	1	-0.201158	-0.583734	25	NDC1;NUP93;NUP54;AAAS;NUP43;NUP133
REACTOME_REGULATION_OF_PTEN_GENE_TRANSCRIPTION	0.995886	1	-0.168952	-0.583984	57	SNAI2;CBX2;RRAGB;SUZ12;SCMH1;TP53;MLST8;MECOM;JUN;CBX4;EED;RING1;PPARG;ATF2;CHD4;LAMTOR4;MTOR;MTA3;LAMTOR5
REACTOME_FORMATION_OF_THE_BETA_CATENIN_TCF_TRANSACTIVATING_COMPLEX	0.981161	1	-0.195143	-0.585762	29	LEO1;LEF1;TLE3
REACTOME_LYSOSOME_VESICLE_BIOGENESIS	0.98196	1	-0.193821	-0.586624	30	AP1S3;M6PR;AP1B1;DNASE2
REACTOME_NEGATIVE_REGULATION_OF_TCF_DEPENDENT_SIGNALING_BY_WNT_LIGAND_ANTAGONISTS	0.937844	1	-0.256996	-0.588364	10	SFRP1;WNT5A;SOST;WNT4
REACTOME_ASPARAGINE_N_LINKED_GLYCOSYLATION	1	1	-0.13654	-0.589511	255	ST6GALNAC5;MGAT3;CHST10;F8;NEU2;SEC22C;ALG2;ALG12;LMAN2L;ALG8;MAN1A1;SEC24A;B4GALT5;MVD;MGAT4B;ARFGAP2;SCFD1;CHST8;ANK1;SPTB;TUBB1;MLEC;COG8;B4GALT4;SLC17A5;ST8SIA4;GMPPA;GOSR2;NAPG;FUOM;COG2;MAN1B1;CD55;TRIM13;RFT1;GORASP1;MPI;SRD5A3;GNPNAT1;DPM3;DOLPP1;ANKRD28;RNF5;ST3GAL1;MCFD2;AMDHD2
REACTOME_CARNITINE_METABOLISM	0.946667	1	-0.240444	-0.591292	13	SLC25A20;ACACA;ACACB;THRSP;SLC22A5
REACTOME_SUMOYLATION_OF_RNA_BINDING_PROTEINS	0.988566	1	-0.182802	-0.591713	41	NDC1;NUP93;NUP54;CBX2;SCMH1;AAAS;NUP43;CBX4;NUP133;RING1;NUP160;NUP205
REACTOME_COPII_MEDIATED_VESICLE_TRANSPORT	0.995324	1	-0.170972	-0.592663	58	F8;SEC22C;LMAN2L;SEC24A;SCFD1;GOSR2;NAPG;GORASP1;ANKRD28;MCFD2;CTSZ;USO1;STX17;NAPA;SEC22B;LMAN2;GRIA1;LMAN1;STX5;RAB1B
REACTOME_BETA_CATENIN_INDEPENDENT_WNT_SIGNALING	0.999768	1	-0.151368	-0.596772	125	GNAT2;PSMA8;LEF1;VANGL2;ARRB2;PRKCG;PLCB3;FZD5;PLCB2;RAC3;NLK;PLCB1;WNT5A;GNG2;PSME3;AGO1;TNRC6C;PRKCB;WNT4;GNG12;PSMB10;GNB1;AP2A2;GNG8;PSMF1;PSMD5;RAC2
REACTOME_NUCLEOTIDE_EXCISION_REPAIR	0.999589	1	-0.15556	-0.596848	104	ERCC2;GTF2H2;DDB2;PIAS3;RFC2;ERCC8;NFRKB;COPS7A;GTF2H3;ERCC5;ERCC1;GTF2H1;ACTR5;LIG3;POLR2A;RPA3;POLE4;RFC1;PARP2;PRPF19;ACTB;POLD2;CUL4B;POLR2I;CCNH;COPS3;POLR2E;USP7;PARP1;POLE3;PCNA;CETN2;ERCC6;POLD1
REACTOME_HCMV_INFECTION	0.998222	1	-0.16166	-0.597295	82	NDC1;VPS37C;NUP93;NUP54;ELK1;TUBB1;SUZ12;AAAS;VPS37D;NUP43;CBX1;NUP133;EED;TBL1XR1;TUBA4A;DAXX;NUP160;NUP205;EGFR;VPS37A;NCOR1
REACTOME_NF_KB_IS_ACTIVATED_AND_SIGNALS_SURVIVAL	0.929857	1	-0.262416	-0.600773	10	NGF
REACTOME_NEGATIVE_REGULATION_OF_NOTCH4_SIGNALING	0.991003	1	-0.179417	-0.604762	50	TACC3;PSME3;PSMB10;SKP1;FBXW7;PSMF1;PSMD5;PSME2;PSMA2;PSMC1;PSMA4;YWHAZ;PSMD9;PSMC5;PSMC3;PSMB5;PSMA6;PSMB3;PSMB8;PSMA3;RPS27A;PSMB9;PSMB6;PSMD1;PSMB2;PSMD7;PSMB4;CUL1;PSMC2;PSMA1;PSMB7;PSMB1;PSMA7;PSMD14;PSMD6;PSMD13;PSMC6;AKT1;PSMD10;PSMA5;PSMC4;PSMD11;PSMD4;PSME1;PSMD2;PSMD8;PSMD3;UBC;NOTCH4;PSMD12
REACTOME_REGULATION_OF_IFNG_SIGNALING	0.938174	1	-0.246466	-0.606102	13	PTPN1;STAT1;IFNGR2;SUMO1;PTPN11;PTPN6
REACTOME_PLASMA_LIPOPROTEIN_CLEARANCE	0.963028	1	-0.213883	-0.608391	23	NR1H3;LIPC;APOBR;MYLIP;APOE;NPC1;AP2A2
REACTOME_SMAD2_SMAD3_SMAD4_HETEROTRIMER_REGULATES_TRANSCRIPTION	0.968199	1	-0.206255	-0.608692	27	CDKN2B;CCNK;RBL1;SP1;TGIF1;SMAD3;TFDP2;E2F5
REACTOME_SUMOYLATION_OF_UBIQUITINYLATION_PROTEINS	0.978043	1	-0.195489	-0.608744	34	NDC1;NUP93;NUP54;AAAS;PIAS2;NUP43;NUP133
REACTOME_CONVERSION_FROM_APC_C_CDC20_TO_APC_C_CDH1_IN_LATE_ANAPHASE	0.952817	1	-0.227848	-0.608779	18	CDC14A;CDC23
REACTOME_SUMOYLATION_OF_IMMUNE_RESPONSE_PROTEINS	0.9301	1	-0.259606	-0.610144	11	PIAS3
REACTOME_TRANSPORT_TO_THE_GOLGI_AND_SUBSEQUENT_MODIFICATION	0.99974	1	-0.150698	-0.610929	152	MGAT3;CHST10;F8;SEC22C;LMAN2L;MAN1A1;SEC24A;B4GALT5;MGAT4B;ARFGAP2;SCFD1;CHST8;ANK1;SPTB;TUBB1;COG8;B4GALT4
REACTOME_INTERLEUKIN_12_SIGNALING	0.981826	1	-0.191897	-0.611343	38	IL12RB2;TYK2;AIP;SERPINB2;MTAP;SNRPA1;TALDO1;PSME2;RAP1B;SOD1;LCP1;CAPZA1
REACTOME_TRAFFICKING_OF_GLUR2_CONTAINING_AMPA_RECEPTORS	0.929135	1	-0.252146	-0.620071	13	GRIP2;PRKCG;PRKCB;AP2A2;PICK1;GRIA1
REACTOME_NOTCH_HLH_TRANSCRIPTION_PATHWAY	0.96161	1	-0.21218	-0.620787	26	HDAC9;NOTCH2;HDAC10;KAT2B
REACTOME_ADHERENS_JUNCTIONS_INTERACTIONS	0.94037	1	-0.236367	-0.623082	17	ANG;CADM1;CADM3
REACTOME_PRE_NOTCH_PROCESSING_IN_GOLGI	0.94003	1	-0.236544	-0.623549	17	NOTCH2;FURIN;MFNG
REACTOME_DUAL_INCISION_IN_TC_NER	0.991176	1	-0.178733	-0.623695	60	ERCC2;GTF2H2;RFC2;ERCC8;GTF2H3;ERCC5;ERCC1;GTF2H1;POLR2A;RPA3;POLE4;RFC1;PRPF19;POLD2;CUL4B;POLR2I;CCNH;POLR2E;USP7;POLE3;PCNA;ERCC6;POLD1;RFC3
REACTOME_ERKS_ARE_INACTIVATED	0.92554	1	-0.254102	-0.62488	13	DUSP7;DUSP4;MAPK7;DUSP3;PPP2R1B;VRK3
REACTOME_WNT5A_DEPENDENT_INTERNALIZATION_OF_FZD4	0.92795	1	-0.249653	-0.625741	14	ARRB2;PRKCG;WNT5A;PRKCB;AP2A2
REACTOME_NEUTROPHIL_DEGRANULATION	1	1	-0.140009	-0.626167	359	MMP8;CXCR2;TRPM2;MMP9;SLCO4C1;PRTN3;TOM1;FGR;IQGAP2;RAB44;NHLRC3;CLEC12A;TBC1D10C;DOK3;CAMP;RAB3A;CEP290;PLAC8;RHOF;XRCC5;ITGAM;STK10;FCGR2A;DSN1;NFAM1;S100A8;XRCC6;FCER1G;ATP11B;ATP6V0C;CPNE1;TICAM2;MLEC;S100A9;ALOX5;ITGB2;LPCAT1;CD53;PLD1;DOCK2;CTSS;LRMP;GHDC;CD55;TYROBP;RAB5B;C1orf35;CMTM6;SIRPA;RHOG;PLEKHO2;PSEN1;RAP2B;AGPAT2;GGH;FTH1;UNC13D;CAPN1;HVCN1;AP2A2;NEU1;ALAD;PTGES2;COMMD9;BIN2;TOLL…
REACTOME_CS_DS_DEGRADATION	0.918331	1	-0.266704	-0.626825	11	NCAN;HYAL1
REACTOME_FORMATION_OF_TC_NER_PRE_INCISION_COMPLEX	0.983528	1	-0.188652	-0.631015	48	ERCC2;GTF2H2;ERCC8;COPS7A;GTF2H3;GTF2H1;POLR2A;PRPF19;CUL4B;POLR2I;CCNH;COPS3;POLR2E
REACTOME_EXPORT_OF_VIRAL_RIBONUCLEOPROTEINS_FROM_NUCLEUS	0.957354	1	-0.213959	-0.631428	27	NDC1;NUP93;NUP54;AAAS;NUP43;NUP133;XPO1;NUP160;NUP205
REACTOME_RETROGRADE_TRANSPORT_AT_THE_TRANS_GOLGI_NETWORK	0.979974	1	-0.191677	-0.632701	45	COG8;M6PR;RAB43;VPS53;ARFRP1;NAPG;RABEPK;COG2;GOLGA1;TMF1;VAMP4;PLIN3;NAA38;ARFIP2;STX6;NAPA;STX16;NAA30;RAB9A;NAA35
REACTOME_P75_NTR_RECEPTOR_MEDIATED_SIGNALLING	0.995097	1	-0.172422	-0.635497	81	ARHGEF16;ADAM17;VAV1;NGF;PRKCI;GNA13;TIAM1;ARHGEF18;ITSN1;RASGRF2;ARHGEF6;ARHGEF3;ARHGEF11;PSEN1;PSENEN;ARHGEF39;MAPK8
REACTOME_DEGRADATION_OF_AXIN	0.984066	1	-0.187864	-0.635538	51	PSMA8
REACTOME_FORMATION_OF_THE_EARLY_ELONGATION_COMPLEX	0.96497	1	-0.206115	-0.637255	33	ERCC2;GTF2H2;NELFA;GTF2H3;GTF2H1;POLR2A;CTDP1;POLR2I;CCNH;POLR2E
REACTOME_SUMOYLATION_OF_DNA_DAMAGE_RESPONSE_AND_REPAIR_PROTEINS	0.989812	1	-0.180785	-0.640778	65	RNF168;NDC1;NUP93;NUP54;WRN;MDC1;CBX2;SCMH1;AAAS;PIAS2;NUP43;CBX4;NUP133
REACTOME_SYNTHESIS_OF_GLYCOSYLPHOSPHATIDYLINOSITOL_GPI	0.927033	1	-0.243903	-0.642947	17	PIGO;PIGL
REACTOME_TNFR2_NON_CANONICAL_NF_KB_PATHWAY	0.993439	1	-0.175271	-0.644676	80	PSMA8;TNFSF8;MAP3K14
REACTOME_ABC_TRANSPORTER_DISORDERS	0.987394	1	-0.184044	-0.646488	62	PSMA8;DERL3
REACTOME_GAP_JUNCTION_ASSEMBLY	0.920764	1	-0.249366	-0.647265	16	GJC2;TUBB1;GJA5;TUBA4A
REACTOME_RUNX1_REGULATES_TRANSCRIPTION_OF_GENES_INVOLVED_IN_DIFFERENTIATION_OF_HSCS	0.987704	1	-0.183285	-0.647698	64	PSMA8;TCF3;SPI1;GATA3;MYB
REACTOME_NRIF_SIGNALS_CELL_DEATH_FROM_THE_NUCLEUS	0.908154	1	-0.263509	-0.648013	13	NGF;PSEN1;PSENEN;MAPK8
REACTOME_MUCOPOLYSACCHARIDOSES	0.900751	1	-0.276112	-0.648937	11	NAGLU;HYAL1
REACTOME_TRAFFICKING_OF_AMPA_RECEPTORS	0.936481	1	-0.230725	-0.649366	22	GRIP2;CAMK2B;PRKCG;AKAP5;PRKCB;AP2A2
REACTOME_HIV_TRANSCRIPTION_ELONGATION	0.966605	1	-0.202894	-0.650816	39	ERCC2;GTF2H2;NELFA;GTF2H3;GTF2H1;SUPT16H;POLR2A;CTDP1;POLR2I;CCNH;POLR2E
REACTOME_AMINO_ACIDS_REGULATE_MTORC1	0.976742	1	-0.194583	-0.650854	48	C12orf66;ITFG2;ATP6V1G2;FLCN;ATP6V0C;RRAGB;SZT2;MLST8
REACTOME_DISEASES_OF_IMMUNE_SYSTEM	0.929633	1	-0.237467	-0.652276	20	TLR1;UNC93B1
REACTOME_MRNA_SPLICING	0.999501	1	-0.159057	-0.652634	166	PPWD1;GPKOW;CSTF2T;SRSF7;PPIL6;PRPF6;LSM7;CPSF1;RBM5;SNRNP25;TFIP11;CDC5L;WBP11;CWC27;POLR2A;SMNDC1;CPSF7;SRSF4;CHERP;PRCC;ZRSR2;SRSF3;SF3A1;LSM6;PRPF19;PRPF3;PRPF38A;SNRPA1;PRPF40A;SF3B4;POLR2I;RBMX;HNRNPD;DNAJC8;CWC25;DHX15;POLR2E;PRPF8;YBX1;EFTUD2;SRSF1;DDX42;PRPF4;BCAS2;HNRNPH1;LSM3;SRRT;HNRNPL;HNRNPA0;RNPC3;SLU7;CCAR1;SRSF2;HNRNPC;NUDT21;PPIL1;SNRPD3;PQBP1;SRSF10
REACTOME_KERATAN_SULFATE_DEGRADATION	0.889604	1	-0.285397	-0.653384	10	LUM
REACTOME_TRANSCRIPTIONAL_REGULATION_BY_RUNX1	0.999409	1	-0.16058	-0.654311	158	PSMA8;RUNX2;CTLA4;SETD1A;PAX5;TCF3;NFE2;SPI1;SIN3A;GATA3;KAT2B;CBX2;MYB;SCMH1;ESR1;LIFR;TNFRSF18;KCTD6;RBBP5;SOCS4;CBX4;PSME3;AGO1;TNRC6C;PRKCB;BLK;PSMB10;CSNK2A1;CCND3;GATA2;RING1;ARID1A;CCNH
REACTOME_CYTOSOLIC_SENSORS_OF_PATHOGEN_ASSOCIATED_DNA	0.978373	1	-0.192003	-0.654526	53	ZBP1;IRF7;DTX4;XRCC5;POLR3K;XRCC6
REACTOME_TRANSCRIPTIONAL_REGULATION_BY_SMALL_RNAS	0.967266	1	-0.201441	-0.655015	42	NDC1;NUP93;NUP54;AAAS;NUP43;POLR2A;AGO1;NUP133;POLR2I;POLR2E;NUP160;NUP205
REACTOME_NONHOMOLOGOUS_END_JOINING_NHEJ	0.948161	1	-0.218435	-0.655676	29	ATM;RNF168;XRCC5;XRCC6;MDC1;TP53BP1
REACTOME_SUMOYLATION_OF_TRANSCRIPTION_COFACTORS	0.965031	1	-0.203678	-0.656452	40	PIAS3;PPARGC1A;SIN3A;CBX2;SCMH1;NCOA2;PIAS2;UHRF2;CBX4;ING2;NCOA1;RING1
REACTOME_INTERLEUKIN_20_FAMILY_SIGNALING	0.904046	1	-0.261929	-0.656509	14	TYK2;STAT1;STAT2;IFNLR1;STAT5B;STAT5A
REACTOME_HCMV_EARLY_EVENTS	0.982308	1	-0.188302	-0.659514	61	NDC1;NUP93;NUP54;ELK1;TUBB1;SUZ12;AAAS;NUP43;CBX1;NUP133;EED;TBL1XR1;TUBA4A;DAXX;NUP160;NUP205;EGFR;NCOR1
REACTOME_PLASMA_LIPOPROTEIN_ASSEMBLY_REMODELING_AND_CLEARANCE	0.969463	1	-0.199559	-0.661323	46	CIDEC;NR1H3;ANGPTL4;FURIN;LIPC;APOBR;ABCA1;MYLIP;APOE;NPC1;MTTP;AP2A2
REACTOME_CLASS_I_MHC_MEDIATED_ANTIGEN_PROCESSING_PRESENTATION	1	1	-0.150997	-0.667495	318	TRIM9;PSMA8;ASB12;RNF182;KBTBD13;FBXO10;FBXL8;FBXO27;ASB5;SEC61A2;TLR1;GAN;FBXO7;LRSAM1;TRIM37;RNF220;RNF213;ASB2;CDC23;SEC24A;NCF2;BTBD6;HERC6;NCF1;TAP1;RNF144B;RNF217;TRAIP;STX4;ERAP1;UBR1;ARIH2;ASB7;KCTD6;LY96;ASB13;CTSS;NCF4;FBXL13;UBA7;MIB2;MYLIP;UBE2O;AREL1;RNF25;DZIP3;ASB1;UBE2E3;PSME3;KLHL42;TAP2;FBXL14;UBE4A;FBXW10;SEC61B;FBXL20;FBXO31;UBR2;PSMB10;RNF115;WSB1;SKP1;FBXW7
REACTOME_RESOLUTION_OF_ABASIC_SITES_AP_SITES	0.951582	1	-0.212202	-0.66887	36	NEIL1;UNG;RFC2;LIG3;RPA3;POLE4;RFC1;MUTYH;PARP2;MBD4;POLD2;ADPRHL2;PARP1;POLE3;PCNA;POLD1;RFC3
REACTOME_TRNA_PROCESSING_IN_THE_NUCLEUS	0.969892	1	-0.19817	-0.670401	51	C2orf49;NDC1;NUP93;NUP54;CPSF1;RPP21;AAAS;FAM98B;RPP14;NUP43;POP1;NUP133
REACTOME_RECYCLING_PATHWAY_OF_L1	0.944848	1	-0.215781	-0.671933	34	RPS6KA5;RPS6KA1;DNM3
REACTOME_SIGNALING_BY_FGFR4_IN_DISEASE	0.864926	1	-0.296994	-0.679933	10	FRS2
REACTOME_LOSS_OF_FUNCTION_OF_MECP2_IN_RETT_SYNDROME	0.875097	1	-0.283227	-0.681657	12	SIN3A;CAMK4;TBL1XR1;NCOR1;HDAC3
REACTOME_HYALURONAN_UPTAKE_AND_DEGRADATION	0.861983	1	-0.298565	-0.683532	10	STAB2;HYAL1;SLC9A1
REACTOME_NS1_MEDIATED_EFFECTS_ON_HOST_PATHWAYS	0.936544	1	-0.219544	-0.683652	34	NDC1;NUP93;NUP54;KPNA3;ISG15;AAAS;NUP43;NUP133;KPNA1
REACTOME_GROWTH_HORMONE_RECEPTOR_SIGNALING	0.900454	1	-0.252374	-0.684055	19	ADAM17;LYN;PTPN1;STAT1;SOCS2;IRS1;GHR;STAT5B;STAT5A
REACTOME_HEDGEHOG_LIGAND_BIOGENESIS	0.967488	1	-0.198051	-0.684566	57	PSMA8;NOTUM;ADAM17
REACTOME_ANTIGEN_PROCESSING_UBIQUITINATION_PROTEASOME_DEGRADATION	0.999851	1	-0.158398	-0.686812	265	TRIM9;PSMA8;ASB12;RNF182;KBTBD13;FBXO10;FBXL8;FBXO27;ASB5;GAN;FBXO7;LRSAM1;TRIM37;RNF220;RNF213;ASB2;CDC23
REACTOME_TRANSCRIPTIONAL_REGULATION_BY_RUNX2	0.990291	1	-0.180047	-0.688643	102	PSMA8;RUNX2;PPARGC1B;GLI2
REACTOME_HYALURONAN_METABOLISM	0.863955	1	-0.293215	-0.689135	11	STAB2;HYAL1;SLC9A1
REACTOME_ANTIVIRAL_MECHANISM_BY_IFN_STIMULATED_GENES	0.971012	1	-0.195044	-0.691319	65	NDC1;NUP93;NUP54;PPM1B;KPNA3;ISG15;AAAS;TRIM25;UBA7;NUP43;EIF4E;STAT1;NUP133;RNASEL;ABCE1;KPNA1
REACTOME_POSITIVE_EPIGENETIC_REGULATION_OF_RRNA_EXPRESSION	0.94987	1	-0.20965	-0.692027	45	TAF1C
REACTOME_RNA_POLYMERASE_III_TRANSCRIPTION_INITIATION_FROM_TYPE_1_PROMOTER	0.912041	1	-0.235144	-0.693946	27	GTF3C5;POLR3K;GTF3C1;TBP;GTF3C3;BDP1;POLR3E;POLR2E
REACTOME_RESOLUTION_OF_SISTER_CHROMATID_COHESION	0.984416	1	-0.185402	-0.696362	91	CDCA5;CDCA8;SKA2;CENPF;ZW10;DSN1;CLASP1;MAD2L1;SPC25;CDK1;KIF18A;NDC80;TUBB1;PPP2R5E;CCNB1;BIRC5;TAOK1;NUP43;PDS5B;PPP2R1B;NUP133;RCC2;RANGAP1
REACTOME_DISORDERS_OF_TRANSMEMBRANE_TRANSPORTERS	0.991951	1	-0.177637	-0.696756	121	PSMA8;SLC4A4;SLC9A9;SLC6A14;DERL3;SLC24A4;NDC1;NUP93;NUP54
REACTOME_SIGNALING_BY_HIPPO	0.881584	1	-0.261369	-0.698342	18	AMOT;STK4;MOB1B;AMOTL1
REACTOME_TRANSLOCATION_OF_SLC2A4_GLUT4_TO_THE_PLASMA_MEMBRANE	0.961738	1	-0.200103	-0.700844	61	EXOC1;EXOC6;C2CD5;TBC1D4;ASPSCR1;MYH9;TUBB1;STX4;EXOC2
REACTOME_REGULATION_OF_MECP2_EXPRESSION_AND_ACTIVITY	0.907016	1	-0.235478	-0.70099	28	CAMK2B;SIN3A;CAMK4;AGO1;TNRC6C;HTT;TBL1XR1
REACTOME_COMPLEX_I_BIOGENESIS	0.945586	1	-0.210704	-0.701464	47	NDUFAF6;NDUFAF7;NDUFAF5;NDUFA3;ECSIT;NDUFAF4;NDUFS8;NDUFAF3;NDUFB4;NDUFS6;NDUFS2;NDUFB6;TMEM126B;NDUFA12;NDUFA5;NDUFV3;NDUFS7;NDUFB9;NDUFA11;NDUFB10;NDUFV1
REACTOME_METHYLATION	0.853296	1	-0.292337	-0.703581	12	TPMT;NNMT;MAT2A;MTRR
REACTOME_SIALIC_ACID_METABOLISM	0.902573	1	-0.238556	-0.704016	27	ST6GALNAC5;NEU2
REACTOME_DEFECTIVE_CFTR_CAUSES_CYSTIC_FIBROSIS	0.954104	1	-0.204909	-0.705795	56	PSMA8;DERL3
REACTOME_TRNA_AMINOACYLATION	0.886651	1	-0.246716	-0.709206	24	SARS2;NARS2
REACTOME_NOTCH4_INTRACELLULAR_DOMAIN_REGULATES_TRANSCRIPTION	0.860798	1	-0.270764	-0.713755	17	NOTCH2;KAT2B;HEY1;HEY2;SMAD3;NOTCH1;RBPJ;MAML3;HES1
REACTOME_REGULATED_PROTEOLYSIS_OF_P75NTR	0.830054	1	-0.31215	-0.714631	10	ADAM17;PSEN1;PSENEN
REACTOME_RHO_GTPASE_EFFECTORS	0.998402	1	-0.169321	-0.714701	209	RHPN2;CDCA8;LIMK1;RTKN;WAS;SKA2;IQGAP2;MAPK11;KLC2;NOXO1;CENPF;ZW10;RHOD;NCF2;KLC3;DSN1;S100A8;CLASP1;MYH9;MAD2L1;NCF1;NOX1;SPC25;KIF18A;NDC80;TUBB1;PPP2R5E;S100A9
REACTOME_TRANSPORT_OF_MATURE_MRNAS_DERIVED_FROM_INTRONLESS_TRANSCRIPTS	0.912973	1	-0.226841	-0.715013	36	NDC1;NUP93;NUP54;CPSF1;SLBP;AAAS;NUP43;NXF1;EIF4E;NUP133
REACTOME_TRANSPORT_OF_MATURE_TRANSCRIPT_TO_CYTOPLASM	0.959665	1	-0.199691	-0.715534	69	NDC1;NUP93;NUP54;SRSF7;THOC6;CPSF1;SLBP;AAAS;NUP43;NXF1;EIF4E;SRSF4;NUP133;SRSF3;GLE1
REACTOME_SUMOYLATION_OF_CHROMATIN_ORGANIZATION_PROTEINS	0.936461	1	-0.213233	-0.71583	49	NDC1;NUP93;NUP54;CBX2;SUZ12;SCMH1;AAAS;PIAS2;NUP43;CBX4;L3MBTL2;NUP133
REACTOME_ROS_AND_RNS_PRODUCTION_IN_PHAGOCYTES	0.895547	1	-0.238513	-0.715946	29	ATP6V1G2;NCF2;NCF1;ATP6V0C;NCF4;HVCN1;TCIRG1;ATP6V1H;ATP6V0D1;RAC2;ATP6V1C1;CYBB;ATP6V1E1;ATP6V0B;ATP6V0E1;SLC11A1;ATP6V1D;CYBA
REACTOME_TICAM1_DEPENDENT_ACTIVATION_OF_IRF3_IRF7	0.82749	1	-0.313181	-0.716992	10	IRF7;TRAF3;TLR3
REACTOME_GOLGI_ASSOCIATED_VESICLE_BIOGENESIS	0.939671	1	-0.211354	-0.71776	52	BLOC1S3;AP1S3;TFRC;TBC1D8B;CPD;AP1B1;ACBD3;BLOC1S4;BLOC1S6;FTH1;PUM1;SH3D19;CLINT1;NAPA
REACTOME_ERCC6_CSB_AND_EHMT2_G9A_POSITIVELY_REGULATE_RRNA_EXPRESSION	0.84959	1	-0.281661	-0.718568	15	CBX3;CHD4;MTA3;ERCC6;MTA1;GATAD2A;RBBP7;MTA2;GATAD2B;CHD3;HDAC1;EHMT2;MBD3;RBBP4;HDAC2
REACTOME_NEDDYLATION	0.997352	1	-0.171756	-0.720592	198	PSMA8;ASB12;KBTBD13;FBXO10;FBXL8;FBXO27;ASB5;DCUN1D4;DCUN1D2;GAN;FBXO7;DDB2;ASB2;DCAF4;CCDC22;ERCC8;COPS7A;BTBD6;COMMD2;UBXN7;UCHL3;ASB7;KCTD6;BIRC5;RBBP5;ASB13;FBXL13;ASB1;PSME3;KLHL42;FBXL14;FBXW10;SOCS2;FBXL20;FBXO31;PSMB10;DCAF7;DCUN1D3;CUL4B;WSB1;SKP1;FBXW7;HIF1A;SOCS6;COMMD9;FBXL12
REACTOME_SRP_DEPENDENT_COTRANSLATIONAL_PROTEIN_TARGETING_TO_MEMBRANE	0.971051	1	-0.192487	-0.726376	94	SEC61A2;SRPRB;SSR3;TRAM1;SEC61B;SPCS3;SSR1;SRP19;RPS19;RPL4;RPL37;RPL13;RPL35;SRP14;RPL38;RPL19;SEC11C;RPS29;RPS21;RPS26;RPS28;RPL35A;RPS23;RPS16;RPS6;RPL9;RPS8;RPS3;RPL37A;RPS9;RPS18;RPL8;SEC61G;RPL5;RPSA;SPCS1;RPL13A;RPL26;RPS5;SPCS2;RPL12;RPLP2;RPS27A;RPL27;RPS10;RPL14;RPL24;RPS11;RPS24;SEC61A1;SRP68;RPL36AL;RPL30;RPS13;RPL23;RPL31;RPL18;RPLP0;RPS15;RPL17;RPS27L;RPS15A;RPS14;RPL18A;RPS17;RPL21…
REACTOME_RNA_POLYMERASE_II_TRANSCRIBES_SNRNA_GENES	0.950135	1	-0.203867	-0.726576	67	ZC3H8;INTS10;SNAPC4;SNAPC1;CCNK;TAF8;INTS12;TAF6;PHAX;TBP;GTF2E1;POLR2A;SP1;GTF2A1;POLR2I;ELL2;INTS5;INTS9;POLR2E;INTS8;SNAPC5
REACTOME_SIGNALING_BY_THE_B_CELL_RECEPTOR_BCR	0.974488	1	-0.189848	-0.727248	103	PSMA8;SYK;ORAI2;PIK3CD;SH3KBP1;DAPP1;VAV1
REACTOME_SEMA4D_IN_SEMAPHORIN_SIGNALING	0.865768	1	-0.255808	-0.727646	23	LIMK1;MYH9;ERBB2;PLXNB1;ARHGEF11
REACTOME_RNA_POLYMERASE_I_TRANSCRIPTION	0.924687	1	-0.216962	-0.728347	49	TAF1C;ERCC2;GTF2H2;KAT2B;GTF2H3
REACTOME_NUCLEAR_SIGNALING_BY_ERBB4	0.871762	1	-0.24938	-0.729628	26	S100B;ADAP1;ADAM17;CXCL12;PGR;ESR1;APOE;PSEN1;PSENEN
REACTOME_HDR_THROUGH_SINGLE_STRAND_ANNEALING_SSA	0.880014	1	-0.241839	-0.731954	30	ATM;RFC2;WRN;BRIP1;HUS1;DNA2;RMI2;ERCC1;RPA3;RMI1;RBBP8
REACTOME_TRANSPORT_OF_THE_SLBP_DEPENDANT_MATURE_MRNA	0.877923	1	-0.242498	-0.733951	30	NDC1;NUP93;NUP54;SLBP;AAAS;NUP43;NXF1;EIF4E;NUP133
REACTOME_ATF6_ATF6_ALPHA_ACTIVATES_CHAPERONE_GENES	0.80813	1	-0.320776	-0.73438	10	NFYA;HSPA5;CALR;HSP90B1;ATF4;XBP1
REACTOME_TRAF6_MEDIATED_NF_KB_ACTIVATION	0.849312	1	-0.26441	-0.735718	21	S100B;MAP3K1;TRAF2;NKIRAS2;TRIM25
REACTOME_HIV_LIFE_CYCLE	0.979319	1	-0.186461	-0.741139	132	RCC1;ERCC2;GTF2H2;NDC1;VPS37C;NUP93;NUP54;NELFA;XRCC5;CCNK;FURIN;TAF9B;CXCR4;GTF2H3;XRCC6;TAF12;TAF7;TAF6;AAAS;GTF2H1;TBP;SUPT16H;CD4;VPS37D;NUP43;GTF2E1;POLR2A;CTDP1;NUP133;GTF2A1;KPNA1
REACTOME_TRANSCRIPTION_OF_E2F_TARGETS_UNDER_NEGATIVE_CONTROL_BY_P107_RBL1_AND_P130_RBL2_IN_COMPLEX_WITH_HDAC1	0.817003	1	-0.296033	-0.74199	14	LIN54;LIN9;CDK1;RBL1;TFDP2;E2F5;RBL2
REACTOME_RNA_POLYMERASE_II_TRANSCRIPTION_TERMINATION	0.91535	1	-0.216941	-0.744791	55	LSM11;CSTF2T;SRSF7;THOC6;CPSF1;SLBP
REACTOME_MAPK6_MAPK4_SIGNALING	0.946764	1	-0.203196	-0.745447	79	MAPK4;PSMA8
REACTOME_B_WICH_COMPLEX_POSITIVELY_REGULATES_RRNA_EXPRESSION	0.865545	1	-0.245051	-0.746985	31	TAF1C
REACTOME_RNA_POLYMERASE_I_TRANSCRIPTION_INITIATION	0.89906	1	-0.225562	-0.747497	46	TAF1C;ERCC2;GTF2H2;KAT2B;GTF2H3
REACTOME_MITOCHONDRIAL_TRNA_AMINOACYLATION	0.821887	1	-0.280295	-0.748911	18	SARS2;NARS2
REACTOME_DOWNREGULATION_OF_ERBB2_SIGNALING	0.83328	1	-0.266847	-0.751029	22	MATK
REACTOME_ERYTHROPOIETIN_ACTIVATES_RAS	0.798668	1	-0.31228	-0.751579	12	CRKL;VAV1
REACTOME_AKT_PHOSPHORYLATES_TARGETS_IN_THE_CYTOSOL	0.802454	1	-0.300587	-0.753404	14	TSC2;AKT3;CDKN1A;BAD;CASP9;GSK3B;CDKN1B;GSK3A
REACTOME_PURINE_SALVAGE	0.784849	1	-0.316915	-0.762735	12	AMPD2;DCK;GMPR2
REACTOME_NEUROTRANSMITTER_RELEASE_CYCLE	0.831892	1	-0.258862	-0.763944	27	SLC1A6;ALDH5A1;RAB3A;SLC22A1;PPFIA3;SLC22A2
REACTOME_CONDENSATION_OF_PROMETAPHASE_CHROMOSOMES	0.769475	1	-0.334574	-0.76597	10	NCAPH;CDK1;CCNB1;SMC2;CSNK2A1
REACTOME_INTERLEUKIN_3_INTERLEUKIN_5_AND_GM_CSF_SIGNALING	0.862467	1	-0.23673	-0.766274	41	SYK;CRKL;PIK3CD;VAV1;INPP5D;PIK3R3
REACTOME_PIWI_INTERACTING_RNA_PIRNA_BIOGENESIS	0.790731	1	-0.300366	-0.766286	15	TDRKH;POLR2A;POLR2I;POLR2E
REACTOME_TRANSCRIPTIONAL_REGULATION_BY_E2F6	0.82822	1	-0.257976	-0.767962	28	CHEK1;RRM2;SUZ12;RBBP8;L3MBTL2;MAX;EHMT1;EED;RING1;TFDP2;CBX3
REACTOME_BIOSYNTHESIS_OF_THE_N_GLYCAN_PRECURSOR_DOLICHOL_LIPID_LINKED_OLIGOSACCHARIDE_LLO_AND_TRANSFER_TO_A_NASCENT_PROTEIN	0.903492	1	-0.215734	-0.770822	68	ST6GALNAC5;NEU2;ALG2;ALG12;ALG8;MVD;SLC17A5;ST8SIA4;GMPPA;FUOM;RFT1;MPI;SRD5A3;GNPNAT1;DPM3;DOLPP1;ST3GAL1;AMDHD2;NEU1;ST6GAL1;ALG3
REACTOME_THE_NLRP3_INFLAMMASOME	0.779711	1	-0.307542	-0.770836	14	PANX1;PYCARD;NLRP3;TXN;P2RX7;PSTPIP1;TXNIP;NFKB1;SUGT1;CASP1;RELA;NFKB2;APP;HSP90AB1
REACTOME_INHIBITION_OF_REPLICATION_INITIATION_OF_DAMAGED_DNA_BY_RB1_E2F1	0.766111	1	-0.32864	-0.772391	11	PRIM1;POLA1;PPP2R1B;POLA2;TFDP2
REACTOME_BASE_EXCISION_REPAIR	0.855025	1	-0.237744	-0.773057	42	NEIL1;UNG;TERF1;RFC2;LIG3;RPA3;POLE4;TERF2IP;RFC1;MUTYH;PARP2;MBD4;POLD2;ADPRHL2;PARP1;POLE3;PCNA;POLD1;TERF2;RFC3
REACTOME_INTERLEUKIN_1_FAMILY_SIGNALING	0.949344	1	-0.19797	-0.773111	117	MAP2K6;PSMA8;S100B;IL18RAP;IL36G;MAP3K3
REACTOME_RMTS_METHYLATE_HISTONE_ARGININES	0.824934	1	-0.25779	-0.773809	29	PRMT5;CARM1;PRMT3
REACTOME_SIGNAL_AMPLIFICATION	0.81109	1	-0.266745	-0.77406	25	GNA14;GNA15
REACTOME_SELENOAMINO_ACID_METABOLISM	0.925671	1	-0.20693	-0.774384	89	GNMT;EEFSEC;NNMT;SCLY;SECISBP2
REACTOME_NR1H3_NR1H2_REGULATE_GENE_EXPRESSION_LINKED_TO_CHOLESTEROL_TRANSPORT_AND_EFFLUX	0.815454	1	-0.261175	-0.777486	28	NR1H3;ABCA1;APOE;AGO1;TNRC6C;NCOA1;TBL1XR1;NCOR1;ABCG1;HDAC3;AGO3;AGO4;NR1H2
REACTOME_REGULATION_OF_LOCALIZATION_OF_FOXO_TRANSCRIPTION_FACTORS	0.763216	1	-0.323492	-0.778564	12	FOXO4;FOXO6;AKT3;SFN
REACTOME_PROCESSING_OF_CAPPED_INTRON_CONTAINING_PRE_MRNA	0.983703	1	-0.18431	-0.779077	211	PPWD1;NDC1;GPKOW;NUP93;NUP54;CSTF2T;SRSF7;THOC6;PPIL6;PRPF6;LSM7;CPSF1;SLBP;RBM5;SNRNP25;METTL3;AAAS;TFIP11;METTL14;CDC5L;WBP11;CWC27;NUP43;NXF1;POLR2A;SMNDC1;EIF4E;CPSF7;SRSF4;CHERP;NUP133;PRCC;ZRSR2;SRSF3;SF3A1;GLE1;LSM6;PRPF19;PRPF3;PRPF38A;SNRPA1;PRPF40A;SF3B4;POLR2I;RBMX;HNRNPD;DNAJC8;CWC25;DHX15;POLR2E;SARNP;PRPF8;YBX1;NUP160;NUP205;EFTUD2;SRSF1;DDX42;PRPF4;BCAS2;HNRNPH1
REACTOME_COBALAMIN_CBL_VITAMIN_B12_TRANSPORT_AND_METABOLISM	0.754846	1	-0.332694	-0.78192	11	MMAB
REACTOME_DETOXIFICATION_OF_REACTIVE_OXYGEN_SPECIES	0.815956	1	-0.256698	-0.782488	31	GPX3;NCF2;TXNRD2;NCF1;GPX2;NCF4;GSR;TXN2;CYBB;SOD1;CCS;PRDX5;GPX1;TXN;CYBA;ATOX1
REACTOME_NUCLEAR_IMPORT_OF_REV_PROTEIN	0.809652	1	-0.2612	-0.784045	29	RCC1;NDC1;NUP93;NUP54
REACTOME_STABILIZATION_OF_P53	0.85941	1	-0.231829	-0.784267	51	PSMA8;ATM
REACTOME_ANTIGEN_PRESENTATION_FOLDING_ASSEMBLY_AND_PEPTIDE_LOADING_OF_CLASS_I_MHC	0.775724	1	-0.287347	-0.789285	20	SEC24A;TAP1;ERAP1;TAP2;HSPA5;CALR;PDIA3;SEC24B;SEC24C;CANX;SEC31A;TAPBP;HLA-G
REACTOME_FORMATION_OF_RNA_POL_II_ELONGATION_COMPLEX	0.854073	1	-0.230918	-0.789832	54	EAF2;ERCC2;LEO1;GTF2H2;NELFA;CCNK;GTF2H3;GTF2H1;SUPT16H;POLR2A;CTDP1;SUPT6H;POLR2I;CCNH;MLLT3;POLR2E;CTR9
REACTOME_HDR_THROUGH_HOMOLOGOUS_RECOMBINATION_HRR	0.84429	1	-0.234608	-0.79367	51	CHEK1;ATM;BRCA2;RFC2;WRN;BRIP1;HUS1;GEN1;DNA2;RMI2;XRCC3;MUS81;RPA3;POLE4;RMI1;RBBP8;RFC1
REACTOME_HIV_TRANSCRIPTION_INITIATION	0.829641	1	-0.241702	-0.794086	44	ERCC2;GTF2H2;TAF9B;GTF2H3;TAF12;TAF7;TAF6;GTF2H1;TBP;GTF2E1;POLR2A;GTF2A1;POLR2I;CCNH
REACTOME_MET_RECEPTOR_RECYCLING	0.733993	1	-0.347305	-0.795115	10	CRKL;GGA3
REACTOME_SNRNP_ASSEMBLY	0.827322	1	-0.242086	-0.795347	44	GEMIN6;PRMT5;NDC1;NUP93;NUP54;PHAX;AAAS;TGS1;NUP43;NUP133;CLNS1A;NUP160;NUP205;SNUPN
REACTOME_METABOLISM_OF_STEROIDS	0.906672	1	-0.208572	-0.795807	100	POMC;VDR;PPARA;STARD5;ARV1;LSS;FDXR;CARM1;NSDHL;SEC24A;NFYA;OSBP;MVD;ACACA;MED1
REACTOME_ZBP1_DAI_MEDIATED_INDUCTION_OF_TYPE_I_IFNS	0.76562	1	-0.289882	-0.796248	20	ZBP1;DTX4
REACTOME_COMMON_PATHWAY_OF_FIBRIN_CLOT_FORMATION	0.73248	1	-0.347953	-0.796598	10	PRTN3;F8
REACTOME_DEFECTS_IN_COBALAMIN_B12_METABOLISM	0.732438	1	-0.347983	-0.796668	10	MMAB
REACTOME_INTERLEUKIN_1_SIGNALING	0.89843	1	-0.212249	-0.797198	91	MAP2K6;PSMA8;S100B;MAP3K3;IRAK3;NOD1;IL1R1
REACTOME_ACTIVATION_OF_IRF3_IRF7_MEDIATED_BY_TBK1_IKK_EPSILON	0.747073	1	-0.312927	-0.798331	15	IRF7;SARM1;TICAM2;LY96;TRAF3
REACTOME_VLDLR_INTERNALISATION_AND_DEGRADATION	0.728339	1	-0.349258	-0.799586	10	NR1H3;MYLIP;AP2A2
REACTOME_REPRESSION_OF_WNT_TARGET_GENES	0.735135	1	-0.332442	-0.800104	12	LEF1;TLE3
REACTOME_DNA_DOUBLE_STRAND_BREAK_REPAIR	0.899892	1	-0.209098	-0.806712	108	CHEK1;ATM;CDK2;CLSPN;BRCA2;RNF168;EYA3;XRCC5;RFC2;WRN;BRIP1;HUS1;XRCC6;MDC1;GEN1;DNA2;RMI2;XRCC3;EYA1;MUS81;TP53;TP53BP1;ERCC1;SIRT6;LIG3;RPA3;POLE4;RMI1;RBBP8;RFC1;PARP2;DCLRE1C;MAPK8;BRCC3;POLD2
REACTOME_RNA_POLYMERASE_III_TRANSCRIPTION	0.796749	1	-0.250912	-0.808685	40	GTF3C5;SNAPC4;SNAPC1;POLR3K;GTF3C1;TBP;NFIA;GTF3C3;BDP1;POLR3E;POLR2E;SNAPC5
REACTOME_EGR2_AND_SOX10_MEDIATED_INITIATION_OF_SCHWANN_CELL_MYELINATION	0.745305	1	-0.294876	-0.809968	20	MPZ
REACTOME_TRANSFERRIN_ENDOCYTOSIS_AND_RECYCLING	0.762566	1	-0.274643	-0.810515	27	ATP6V1G2;TFRC;STEAP3;TF;ATP6V0C
REACTOME_TRANS_GOLGI_NETWORK_VESICLE_BUDDING	0.837331	1	-0.228508	-0.812462	66	BLOC1S3;AP1S3;TFRC;TBC1D8B;STX4;M6PR;CPD;AP1B1;ACBD3;DNASE2;BLOC1S4;BLOC1S6;FTH1;CTSZ;AP4S1;PUM1;SH3D19;CLINT1;NAPA
REACTOME_HIV_INFECTION	0.949399	1	-0.193629	-0.815935	206	PSMA8;RCC1;AP1S3;LCK;ERCC2;CD28;GTF2H2;NDC1;PACS1;VPS37C;NUP93;NUP54;NELFA;XRCC5;CCNK;FURIN;TAF9B;CXCR4;GTF2H3;XRCC6;TAF12;TAF7;TAF6;AAAS;GTF2H1;HCK;AP1B1;DOCK2;TBP;SUPT16H;CD4;VPS37D;NUP43;GTF2E1;POLR2A;CTDP1;PSME3;NUP133;GTF2A1;KPNA1;PSMB10;RANGAP1;POLR2I;SKP1;AP2A2;CCNH;ELMO1;XPO1
REACTOME_P38MAPK_EVENTS	0.713595	1	-0.332571	-0.817849	13	MAPK11;MAPK12;MAPK13
REACTOME_DNA_REPAIR	0.957603	1	-0.191285	-0.821195	242	CHEK1;NEIL1;UNG;ATM;CDK2;ALKBH2;ERCC2;CLSPN;BRCA2;GTF2H2;DDB2;RNF168;PIAS3;EYA3;TERF1;REV3L;XRCC5;RFC2;WRN;BRIP1;HUS1;ERCC8;NFRKB;MGMT;COPS7A;GTF2H3;XRCC6;MDC1;ERCC5;GEN1;UBE2T;DNA2;RMI2;XRCC3;EYA1;USP10;ISG15;MUS81;TP53;TP53BP1;ERCC1;GTF2H1;SIRT6;ACTR5;TRIM25;LIG3;UBA7;POLR2A;RPA3;POLE4;TERF2IP;RMI1;FTO;RBBP8;RFC1;MUTYH;PARP2;USP1;PRPF19;MBD4;DCLRE1C;ACTB;MAPK8;BRCC3;POLD2;CUL4B
REACTOME_PLASMA_LIPOPROTEIN_REMODELING	0.718773	1	-0.311776	-0.821865	17	CIDEC;ANGPTL4;FURIN;LIPC
REACTOME_TRANSCRIPTION_OF_THE_HIV_GENOME	0.812354	1	-0.233684	-0.823481	63	ERCC2;GTF2H2;NELFA;CCNK;TAF9B;GTF2H3;TAF12;TAF7;TAF6;GTF2H1;TBP;SUPT16H;GTF2E1;POLR2A;CTDP1;GTF2A1;POLR2I;CCNH
REACTOME_PHOSPHOLIPID_METABOLISM	0.905631	1	-0.203479	-0.827619	156	BCHE;PLD4;PIK3CG;PIK3CD;PLEKHA4;STARD10;AGPAT1;ACP6;FIG4;VAC14;CRLS1;PCTP;PLBD1;DDHD1;PLA2R1;INPP5D;PIK3R3;GDPD5;MTMR4;RUFY1;AGK;PIK3R6;PNPLA3;CPNE1;CDS1;LPCAT3;LPCAT1;TNFAIP8L2;MTMR7;PI4KA;PITPNM1;PLD1;AGPAT5;STARD7;LPGAT1;CEPT1;LPCAT2;GPD1L;DDHD2;HADHB;TNFAIP8
REACTOME_SYNTHESIS_OF_PA	0.718847	1	-0.2977	-0.828346	21	AGPAT1;ACP6;DDHD1;PLA2R1;LPCAT1;PLD1;AGPAT5;GPD1L;DDHD2;AGPAT2
REACTOME_CELL_CYCLE_CHECKPOINTS	0.931423	1	-0.196812	-0.830167	208	PSMA8;CHEK1;CDCA8;MCM2;SKA2;CCNE1;ATM;MCM8;CDK2;CCNE2;CLSPN;RNF168;CENPF;ZW10;CDC23;MCM7;RFC2;WRN;BRIP1;HUS1;DSN1;CLASP1;MAD2L1;MDC1;SPC25;DNA2;CDK1;RMI2;KIF18A;NDC80;PPP2R5E;TP53;TP53BP1;CCNB1;MCM3;BIRC5;TAOK1;NUP43;RPA3;PCBP4;RMI1;RBBP8;PSME3;ORC2;PPP2R1B;NUP133
REACTOME_METABOLISM_OF_STEROID_HORMONES	0.694801	1	-0.332286	-0.832854	14	POMC;FDXR
REACTOME_DDX58_IFIH1_MEDIATED_INDUCTION_OF_INTERFERON_ALPHA_BETA	0.773589	1	-0.244909	-0.837687	54	S100B;MAP3K1;IRF7;ATG12;ISG15;TRAF2;NLRX1;NKIRAS2;TRIM25;UBA7
REACTOME_POLYMERASE_SWITCHING_ON_THE_C_STRAND_OF_THE_TELOMERE	0.689149	1	-0.323763	-0.840376	16	PRIM1;RFC2;POLA1;RFC1;POLA2;POLD2;CHTF8;PCNA;POLD1;RFC3
REACTOME_DUAL_INCISION_IN_GG_NER	0.73416	1	-0.265524	-0.84193	37	ERCC2;GTF2H2;DDB2;RFC2;GTF2H3;ERCC5;ERCC1;GTF2H1;RPA3;POLE4;RFC1;PARP2;POLD2;CUL4B
REACTOME_INTERACTIONS_OF_REV_WITH_HOST_CELLULAR_PROTEINS	0.719942	1	-0.274151	-0.842276	32	RCC1;NDC1;NUP93;NUP54;AAAS;NUP43;NUP133;RANGAP1;XPO1;NUP160;NUP205
REACTOME_MHC_CLASS_II_ANTIGEN_PRESENTATION	0.812967	1	-0.224637	-0.843729	91	CTSE;KIF26A;LAG3;AP1S3;KLC2;DNM3;SEC24A;KLC3;KIF18A;TUBB1;AP1B1;HLA-DMA;CTSS
REACTOME_POLYMERASE_SWITCHING	0.678562	1	-0.336716	-0.843958	14	PRIM1;RFC2;POLA1;RFC1;POLA2;POLD2;PCNA;POLD1;RFC3
REACTOME_SIGNALING_BY_NOTCH2	0.701852	1	-0.288846	-0.845096	26	NEURL1B;NOTCH2;JAG2;MIB2;PSEN1;PSENEN;MDK;RBPJ;MAML3;HES1
REACTOME_CRISTAE_FORMATION	0.669149	1	-0.359837	-0.845712	11	APOO;CHCHD3;DNAJC11;TMEM11;MTX1;APOOL;MTX2
REACTOME_METABOLISM_OF_FOLATE_AND_PTERINES	0.673135	1	-0.338271	-0.847856	14	DHFR;SHMT1;ALDH1L2;SLC46A1
REACTOME_INTERFERON_SIGNALING	0.849321	1	-0.212526	-0.848193	136	TRIM14;TRIM6;TRIM68;IFIT3;IRF4;IRF7;NDC1;NUP93;NUP54;CAMK2B;PPM1B;KPNA3;GBP2;SAMHD1;TYK2;TRIM29;ISG15;AAAS;IFNAR1;TRIM45;PTPN1;GBP4;TRIM25;UBA7;NUP43;EIF4E;STAT1;GBP5;NUP133;RNASEL;ABCE1;KPNA1
REACTOME_LAGGING_STRAND_SYNTHESIS	0.681461	1	-0.309438	-0.849966	20	PRIM1;RFC2;DNA2;RPA3;POLA1;RFC1;POLA2;POLD2;PCNA;POLD1;RFC3
REACTOME_DISEASES_OF_PROGRAMMED_CELL_DEATH	0.681809	1	-0.305627	-0.850403	21	CDK5R1
REACTOME_NUCLEOTIDE_BINDING_DOMAIN_LEUCINE_RICH_REPEAT_CONTAINING_RECEPTOR_NLR_SIGNALING_PATHWAYS	0.738997	1	-0.254312	-0.850641	48	MAP2K6;MAPK11;MAPK12;NOD1;MAPK13;PANX1;CASP4;BCL2L1;CYLD;TAB2;PYCARD;NLRP3
REACTOME_INTRA_GOLGI_TRAFFIC	0.707557	1	-0.267401	-0.857732	39	RAB36;RAB30;VPS45;GOLGA5;MAN1A1;COG8;GOSR2;NAPG;COG2;RAB33B
REACTOME_NOTCH1_INTRACELLULAR_DOMAIN_REGULATES_TRANSCRIPTION	0.713505	1	-0.264201	-0.859088	42	HDAC9;HEYL;TLE3;HDAC10;KAT2B;HEY1;HEY2;TLE2;TBL1XR1;NOTCH1;SKP1;FBXW7;HIF1A;RBPJ;MAML3;NCOR1;HES1
REACTOME_GLUCAGON_TYPE_LIGAND_RECEPTORS	0.653391	1	-0.34367	-0.861389	14	GLP1R;GNG2;GNG12;GNB1;GNG8;GNG11
REACTOME_MITOCHONDRIAL_TRANSLATION	0.770894	1	-0.229743	-0.862908	91	GFM2;MRPL9;MRPL53;MTFMT;MRPL39;MRPL34;MRPS18A;MRPS2;MRPS7;MRPL1;MRPS28;MTIF3;MRPL41;MRPL2;MRPL21;MRPS12;MRPL16;MRPL18;MRPL11;MRPL20;MRPL12;TSFM;MRPS26;MRPL13;MRPS33;MRPS11;MRPL14;MRRF;MRPS14;MRPL36;MRPL49;CHCHD1;MRPL32;MRPL15;MRPS21;MTRF1L;MRPL17;MRPL45;MRPL28;MRPL55;MRPS18B;MRPL30;MRPS24;MRPL52;MRPL22
REACTOME_SENESCENCE_ASSOCIATED_SECRETORY_PHENOTYPE_SASP	0.69931	1	-0.265101	-0.866633	43	CDKN2B;CDK2;RPS6KA1;FOS;CEBPB;CDC23
REACTOME_HATS_ACETYLATE_HISTONES	0.737452	1	-0.240316	-0.867794	72	YEATS2;ING5;ELP6;SUPT3H;CLOCK;KAT2B;TAF12;TADA2A;KAT8;TADA3;TAF5L;NCOA2;BRPF3;MEAF6;SAP130;OGT;KAT6A;NCOA1;BRD1;ACTB
REACTOME_REGULATION_OF_KIT_SIGNALING	0.644431	1	-0.33542	-0.870631	16	SH2B2;LCK
REACTOME_REGULATION_OF_CHOLESTEROL_BIOSYNTHESIS_BY_SREBP_SREBF	0.704601	1	-0.255626	-0.871411	53	PPARA;LSS;CARM1;SEC24A;NFYA;MVD;ACACA;MED1;NCOA2;ACACB;PMVK;TGS1;SP1;HELZ2;NCOA1;TBL1XR1
REACTOME_NUCLEAR_PORE_COMPLEX_NPC_DISASSEMBLY	0.663226	1	-0.286722	-0.87401	31	NDC1;NUP93;NUP54;NEK6;CDK1;CCNB1;AAAS;NUP43;NUP133;NEK7;NUP160;NUP205
REACTOME_FORMATION_OF_INCISION_COMPLEX_IN_GG_NER	0.677367	1	-0.271613	-0.875407	40	ERCC2;GTF2H2;DDB2;PIAS3;GTF2H3;ERCC5;ERCC1;GTF2H1;RPA3;PARP2;CUL4B;CCNH
REACTOME_HOST_INTERACTIONS_OF_HIV_FACTORS	0.767841	1	-0.225203	-0.875901	114	PSMA8;RCC1;AP1S3;LCK;CD28;NDC1;PACS1;NUP93;NUP54;AAAS;HCK;AP1B1;DOCK2;CD4;NUP43;PSME3;NUP133;KPNA1;PSMB10;RANGAP1;SKP1;AP2A2;ELMO1;XPO1;ATP6V1H;PSMF1;PSMD5;NUP160;NUP205;PSME2
REACTOME_HOMOLOGY_DIRECTED_REPAIR	0.731273	1	-0.236897	-0.876792	83	CHEK1;ATM;CDK2;CLSPN;BRCA2;RNF168;RFC2;WRN;BRIP1;HUS1;MDC1;GEN1;DNA2;RMI2;XRCC3;MUS81;TP53BP1;ERCC1;SIRT6;LIG3;RPA3;POLE4;RMI1;RBBP8;RFC1;PARP2;BRCC3;POLD2;TIMELESS;RAD1;XRCC2;PPP4C;RAD9A;BABAM1;RAD51C;PARP1;POLE3;PCNA
REACTOME_REGULATION_OF_TP53_EXPRESSION_AND_DEGRADATION	0.658235	1	-0.285738	-0.877876	32	PRR5;PRDM1;ATM;CDK2
REACTOME_SIGNALING_BY_RHO_GTPASES	0.88934	1	-0.198517	-0.878412	320	RHPN2;ARHGEF16;CDCA8;CHN2;ARHGAP33;LIMK1;RTKN;SRGAP1;WAS;ARHGAP11A;SKA2;ARHGAP18;ARHGAP22;IQGAP2;ARHGAP28;MAPK11;KLC2;NOXO1;FAM13B;VAV1;CENPF;ZW10;ARHGAP30;RHOF;GNA13;TIAM1;RHOD;NCF2;ARHGEF18;KLC3;DSN1;ITSN1;S100A8;CLASP1;MYH9;MAD2L1;ARHGDIB;NCF1;NOX1;SPC25;RASGRF2;KIF18A;NDC80;TUBB1;PPP2R5E;ARHGAP32;S100A9;NCOA2;RHOH;ARHGEF6;RAC3;ARAP1;ARHGAP42;ARHGEF3;BIRC5;ARHGAP27;NCF4;INPP5B;TAOK1;ARHGAP5;NC…
REACTOME_VXPX_CARGO_TARGETING_TO_CILIUM	0.6323	1	-0.333233	-0.878429	17	EXOC1;EXOC6;EXOC2;EXOC8
REACTOME_MYD88_INDEPENDENT_TLR4_CASCADE	0.733919	1	-0.234847	-0.878855	89	MAP2K6;S100B;RPS6KA5;MAPK11;IRF7;RPS6KA1;FOS;NOD1;ELK1;DUSP7;DUSP4;SARM1;TICAM2;NKIRAS2;MAPK7;LY96;JUN;RPS6KA2;DUSP3;PPP2R1B;MEF2C;TRAF3;MAPK8;SKP1;TAB2;ATF2;VRK3
REACTOME_INTERLEUKIN_6_SIGNALING	0.619771	1	-0.383934	-0.878973	10	TYK2;IL6R;STAT1
REACTOME_ASSEMBLY_OF_THE_HIV_VIRION	0.626879	1	-0.357656	-0.879539	13	VPS37C;FURIN;VPS37D
REACTOME_TOLL_LIKE_RECEPTOR_4_TLR4_CASCADE	0.757998	1	-0.226247	-0.87996	114	MAP2K6;S100B;RPS6KA5;MAPK11;TLR1;MAP3K1;IRF7;IRAK3;RPS6KA1;FOS;DNM3;NOD1;ITGAM;ELK1;DUSP7;DUSP4;SARM1;TICAM2;ITGB2;NKIRAS2;MAPK7;LY96;JUN;RPS6KA2;DUSP3;PPP2R1B;MEF2C;TRAF3;ECSIT;MAPK8
REACTOME_LONG_TERM_POTENTIATION	0.617396	1	-0.384781	-0.880913	10	DLG3;CAMK2B;GRIN2A
REACTOME_CA2_PATHWAY	0.679798	1	-0.264675	-0.881143	47	GNAT2;LEF1;PLCB3;FZD5;PLCB2;NLK;PLCB1;WNT5A;GNG2;AGO1;TNRC6C;GNG12;GNB1;GNG8
REACTOME_ION_HOMEOSTASIS	0.655947	1	-0.275929	-0.885089	39	SLC8A1;ORAI2;RYR1;FKBP1B;SLC8A2;CAMK2B
REACTOME_TRANSCRIPTIONAL_REGULATION_BY_VENTX	0.645428	1	-0.285134	-0.887896	34	LEF1;CEBPB;CDC23;CSF1R;TP53;AGO1;TNRC6C;EHMT1;UBE2E1;UBE2D1;ANAPC2;TCF7L2;AGO3;AGO4
REACTOME_ONCOGENE_INDUCED_SENESCENCE	0.629176	1	-0.296599	-0.890302	29	CDKN2B;E2F2;TP53;ID1;SP1;AGO1;TNRC6C;TFDP2
REACTOME_TELOMERE_C_STRAND_LAGGING_STRAND_SYNTHESIS	0.626418	1	-0.306813	-0.890332	25	PRIM1;RFC2;WRN;DNA2;RPA3;POLA1;RFC1;POLA2;POLD2;CHTF8;PCNA;POLD1;RFC3
REACTOME_RNA_POLYMERASE_I_PROMOTER_ESCAPE	0.63299	1	-0.292327	-0.891096	31	TAF1C;ERCC2;GTF2H2;GTF2H3;GTF2H1;TBP;RRN3;CCNH;ZNRD1;POLR2E;CBX3
REACTOME_SYNTHESIS_OF_PIPS_AT_THE_EARLY_ENDOSOME_MEMBRANE	0.613299	1	-0.343498	-0.891601	16	FIG4;VAC14;MTMR4
REACTOME_P75NTR_SIGNALS_VIA_NF_KB	0.608821	1	-0.362771	-0.892116	13	NGF;PRKCI
REACTOME_NEGATIVE_EPIGENETIC_REGULATION_OF_RRNA_EXPRESSION	0.657312	1	-0.268039	-0.89234	47	TAF1C;SAP30;ERCC2;GTF2H2;SIN3A;GTF2H3
REACTOME_INTERLEUKIN_35_SIGNALLING	0.603239	1	-0.371279	-0.893575	12	IL12RB2;IL27RA;TYK2
REACTOME_RESOLUTION_OF_D_LOOP_STRUCTURES	0.61657	1	-0.311227	-0.894648	24	ATM;BRCA2;WRN;BRIP1;GEN1;DNA2;RMI2;XRCC3;MUS81;RMI1;RBBP8
REACTOME_PRE_NOTCH_EXPRESSION_AND_PROCESSING	0.647755	1	-0.272335	-0.894726	44	NOTCH2;PRKCI;FURIN;KAT2B;TP53;MFNG;SIRT6;POGLUT1;JUN;AGO1;TNRC6C;NOTCH1;TFDP2;POFUT1;RBPJ;MAML3
REACTOME_GLYCEROPHOSPHOLIPID_BIOSYNTHESIS	0.688693	1	-0.241814	-0.89499	83	BCHE;PLD4;STARD10;AGPAT1;ACP6;CRLS1;PCTP;PLBD1;DDHD1;PLA2R1;AGK;PNPLA3;CPNE1;CDS1;LPCAT3;LPCAT1;PITPNM1;PLD1;AGPAT5;STARD7;LPGAT1;CEPT1;LPCAT2;GPD1L;DDHD2;HADHB
REACTOME_PROCESSING_OF_CAPPED_INTRONLESS_PRE_MRNA	0.615992	1	-0.311389	-0.895113	24	LSM11;CSTF2T;CPSF1;SLBP
REACTOME_CD28_DEPENDENT_VAV1_PATHWAY	0.591794	1	-0.393192	-0.900168	10	LCK;CD28;VAV1
REACTOME_DECTIN_1_MEDIATED_NONCANONICAL_NF_KB_SIGNALING	0.650761	1	-0.259858	-0.900783	58	PSMA8;MAP3K14;CCL22
REACTOME_SIGNALING_BY_BMP	0.597497	1	-0.320974	-0.903368	22	ACVR2A;SMAD9;SMAD6;AMHR2
REACTOME_RNA_POLYMERASE_I_TRANSCRIPTION_TERMINATION	0.606501	1	-0.301017	-0.903562	29	TAF1C;ERCC2;GTF2H2;GTF2H3;GTF2H1;TBP
REACTOME_INTRINSIC_PATHWAY_FOR_APOPTOSIS	0.62807	1	-0.275184	-0.904087	44	BID;BMF;TP53;BCL2L1;AKT3;MAPK8;TFDP2;SFN;XIAP;BAD;CASP9;DYNLL1;CASP7;DYNLL2;BAX;YWHAZ;MAPK1
REACTOME_PROCESSIVE_SYNTHESIS_ON_THE_C_STRAND_OF_THE_TELOMERE	0.587697	1	-0.375695	-0.904203	12	WRN;DNA2;RPA3;POLD2;PCNA;POLD1
REACTOME_SEMA4D_INDUCED_CELL_MIGRATION_AND_GROWTH_CONE_COLLAPSE	0.593379	1	-0.329387	-0.90476	20	LIMK1;MYH9;ERBB2;PLXNB1;ARHGEF11
REACTOME_ANTIMICROBIAL_PEPTIDES	0.581826	1	-0.327859	-0.912264	21	PRTN3;TLR1;CAMP;CCR2;S100A8;RNASE6;S100A9
REACTOME_INTERLEUKIN_10_SIGNALING	0.59082	1	-0.306566	-0.91261	28	CCL22;IL10RA;CCR2;IL1R1;IL18;TYK2;CXCL10;CSF1
REACTOME_DECTIN_2_FAMILY	0.573233	1	-0.399611	-0.914864	10	CLEC4E;SYK
REACTOME_PI_3K_CASCADE_FGFR3	0.566208	1	-0.391441	-0.919992	11	FGF18;FRS2;FGF1
REACTOME_G_PROTEIN_BETA_GAMMA_SIGNALLING	0.575615	1	-0.317137	-0.920291	25	PIK3CG;PLCB3;PIK3R6;PLCB2;ARHGEF6;PLCB1;GNG2;AKT3;GNG12;GNB1;GNG8
REACTOME_INSULIN_PROCESSING	0.568476	1	-0.344601	-0.920728	18	EXOC1;EXOC6;SLC30A6;KIF5C;EXOC2;EXOC8
REACTOME_RAF_INDEPENDENT_MAPK1_3_ACTIVATION	0.564243	1	-0.331779	-0.923171	21	DUSP7;TYK2;DUSP4;CDK1;IL6R;PEA15;DUSP16;DUSP5
REACTOME_TOLL_LIKE_RECEPTOR_TLR1_TLR2_CASCADE	0.620133	1	-0.248501	-0.925748	86	MAP2K6;S100B;RPS6KA5;MAPK11;TLR1;MAP3K1;IRAK3;RPS6KA1;FOS;NOD1;ELK1;DUSP7;DUSP4;NKIRAS2;MAPK7;LY96;JUN;RPS6KA2;DUSP3;PPP2R1B;MEF2C;ECSIT;MAPK8;SKP1;TAB2;ATF2;VRK3
REACTOME_FOXO_MEDIATED_TRANSCRIPTION_OF_CELL_CYCLE_GENES	0.560501	1	-0.363337	-0.926937	15	FOXO4;GADD45A;PCBP4;SMAD3;CDKN1A;CCNG2;RBL2
REACTOME_CYTOCHROME_P450_ARRANGED_BY_SUBSTRATE_TYPE	0.56477	1	-0.311527	-0.927376	28	POMC;CYP2U1;CYP4F3;FDXR;CYP4F12;CYP2E1;NCOA2;AHR;CYP4V2
REACTOME_TP53_REGULATES_TRANSCRIPTION_OF_CELL_DEATH_GENES	0.570277	1	-0.304369	-0.927803	31	BID;ATM;IGFBP3;STEAP3
REACTOME_PI_3K_CASCADE_FGFR2	0.552748	1	-0.385838	-0.928616	12	FGF18;FRS2;FGF1
REACTOME_CYTOSOLIC_IRON_SULFUR_CLUSTER_ASSEMBLY	0.548104	1	-0.397217	-0.933567	11	ERCC2;MMS19;BRIP1
REACTOME_DISEASES_ASSOCIATED_WITH_N_GLYCOSYLATION_OF_PROTEINS	0.549787	1	-0.359914	-0.934211	16	ALG2;ALG12;ALG8;MAN1B1;RFT1
REACTOME_SIGNALING_BY_NTRKS	0.607024	1	-0.241239	-0.937186	113	CDK5R1;RPS6KA5;CRKL;PTPRO;MAPK11;FRS2;RPS6KA1;FOS;MAPK12;DNM3;NGF;FOSB;ID2;TIAM1;FURIN;ELK1;ID3;DUSP7;MAPK13;DUSP4
REACTOME_REGULATION_OF_FOXO_TRANSCRIPTIONAL_ACTIVITY_BY_ACETYLATION	0.533611	1	-0.412247	-0.943792	10	FOXO4;KAT2B
REACTOME_TOLL_LIKE_RECEPTOR_10_TLR10_CASCADE	0.561859	1	-0.261393	-0.945852	73	MAP2K6;S100B;RPS6KA5;MAPK11;MAP3K1;RPS6KA1;FOS;NOD1;ELK1;DUSP7;DUSP4;NKIRAS2;MAPK7;JUN;RPS6KA2;DUSP3;PPP2R1B;MEF2C;ECSIT;MAPK8;SKP1;TAB2;ATF2;VRK3
REACTOME_GLUCONEOGENESIS	0.529265	1	-0.336216	-0.946264	22	SLC25A10;ENO3;GOT1;ENO2
REACTOME_CRMPS_IN_SEMA3A_SIGNALING	0.526642	1	-0.393902	-0.948023	12	CDK5R1;FES
REACTOME_NGF_STIMULATED_TRANSCRIPTION	0.534194	1	-0.313513	-0.948884	30	CDK5R1;FOS;FOSB;ID2;ELK1;ID3
REACTOME_CHROMATIN_MODIFYING_ENZYMES	0.601645	1	-0.228404	-0.949137	184	SUV39H2;YEATS2;SETD1A;ING5;ELP6;PADI4;SAP30;ATF7IP;PRMT5;CARM1;SUPT3H;HDAC10;CLOCK;KDM5D;KAT2B;TAF12;TADA2A;PRMT3;KDM7A;SUZ12;KAT8;PHF8;TADA3;TAF5L;NCOA2;BRPF3;MECOM;RBBP5;MEAF6;SAP130;OGT;SMYD3;JMJD6;KDM3B;KAT6A;NCOA1;EHMT1;EED;SETDB1;BRD1;ACTB;TBL1XR1;SETD3
REACTOME_S_PHASE	0.586261	1	-0.235615	-0.949685	146	CDT1;CDCA5;PSMA8;MCM2;CCNE1;MCM8;CDK2;LIN54;PRIM1;CCNE2;GINS3;CDC23;LIN9;GINS2;MCM7;RFC2
REACTOME_ACTIVATION_OF_ANTERIOR_HOX_GENES_IN_HINDBRAIN_DEVELOPMENT_DURING_EARLY_EMBRYOGENESIS	0.542186	1	-0.279105	-0.95145	53	HOXA4;MAFB;HOXC4;SUZ12;HOXA3;PKNOX1;PAGR1;NCOA3;CNOT6;HOXB3;HOXB2;PIAS2;RBBP5;JUN;POLR2A;EED;HOXA2;POLR2I;POLR2E;CTCF;NCOR1;KMT2C;HDAC3;KMT2D
REACTOME_CARGO_TRAFFICKING_TO_THE_PERICILIARY_MEMBRANE	0.530522	1	-0.290338	-0.953876	44	BBS10;BBS1;BBS12;EXOC1;EXOC6;BBS9
REACTOME_TRANSCRIPTIONAL_REGULATION_OF_WHITE_ADIPOCYTE_DIFFERENTIATION	0.541079	1	-0.264455	-0.954961	72	PPARA;ANGPTL4;CARM1;CEBPB;PPARGC1A;MED11;MED1;MED26;NCOA2;NCOA3;CEBPA;MED20;NR2F2;MED6;TGS1;HELZ2;NCOA1;CCND3;TBL1XR1;THRAP3;PPARG
REACTOME_G2_M_CHECKPOINTS	0.555911	1	-0.245522	-0.95669	115	PSMA8;CHEK1;MCM2;ATM;MCM8;CDK2;CLSPN;RNF168;MCM7;RFC2;WRN;BRIP1;HUS1;MDC1;DNA2;CDK1;RMI2;TP53;TP53BP1;CCNB1;MCM3;RPA3;RMI1;RBBP8;PSME3;ORC2
REACTOME_P75NTR_RECRUITS_SIGNALLING_COMPLEXES	0.512044	1	-0.419846	-0.96119	10	NGF;PRKCI
REACTOME_REMOVAL_OF_THE_FLAP_INTERMEDIATE_FROM_THE_C_STRAND	0.510741	1	-0.409024	-0.961315	11	WRN;DNA2;RPA3;POLD2;PCNA;POLD1
REACTOME_INOSITOL_PHOSPHATE_METABOLISM	0.513304	1	-0.300447	-0.963735	39	IMPA2;PLD4;INPP5D;PLCB3;PLCB2;MTMR7;PLCE1;INPP5B;PLCB1
REACTOME_ACTIVATED_TAK1_MEDIATES_P38_MAPK_ACTIVATION	0.503401	1	-0.355892	-0.964637	19	MAP2K6;MAPK11;NOD1
REACTOME_DAP12_INTERACTIONS	0.50611	1	-0.318747	-0.964727	30	GRAP2;CD300LB;SYK;LCK;LAT
REACTOME_GLUTAMATE_NEUROTRANSMITTER_RELEASE_CYCLE	0.503014	1	-0.401224	-0.965646	12	SLC1A6;RAB3A;PPFIA3
REACTOME_GPVI_MEDIATED_ACTIVATION_CASCADE	0.50613	1	-0.312406	-0.965879	33	SYK;PIK3CG;LCK;VAV1;LAT;PIK3R3;PIK3R6;FCER1G;GP6;LYN;LCP2;RHOG;PIK3R2
REACTOME_DNA_DAMAGE_TELOMERE_STRESS_INDUCED_SENESCENCE	0.499572	1	-0.333524	-0.967843	25	CCNE1;ATM;CDK2;CCNE2;TERF1;CABIN1;TP53
REACTOME_DNA_REPLICATION	0.527153	1	-0.248866	-0.967933	114	CDT1;PSMA8;MCM2;CCNE1;MCM8;CDK2;PRIM1;E2F2;CCNE2;GINS3;CDC23;GINS2;MCM7;RFC2
REACTOME_TELOMERE_EXTENSION_BY_TELOMERASE	0.497593	1	-0.395126	-0.971682	13	WRAP53;TERF1;DKC1;TERF2IP;NOP10
REACTOME_HOMOLOGOUS_DNA_PAIRING_AND_STRAND_EXCHANGE	0.492597	1	-0.315041	-0.974025	33	CHEK1;ATM;BRCA2;RFC2;WRN;BRIP1;HUS1;DNA2;RMI2;XRCC3
REACTOME_BBSOME_MEDIATED_CARGO_TARGETING_TO_CILIUM	0.487867	1	-0.350211	-0.974458	21	BBS10;BBS1;BBS12;BBS9
REACTOME_TBC_RABGAPS	0.489046	1	-0.303138	-0.977011	40	TBC1D10C;GGA2;TSC2;GGA3;SYTL1;TBC1D14;ULK1;TBC1D10A;RAB5B;RAB33B;RABGEF1;TBC1D24;GGA1;TBC1D15
REACTOME_DISEASES_ASSOCIATED_WITH_O_GLYCOSYLATION_OF_PROTEINS	0.489233	1	-0.304652	-0.977221	39	SPON2;SEMA5B;ADAMTS4;ADAMTS15
REACTOME_SIGNALING_BY_INTERLEUKINS	0.531372	1	-0.219272	-0.978519	350	OSM;BATF;MAP2K6;PSMA8;CSF3R;HAVCR2;POMC;MMP9;S100B;SYK;RPS6KA5;IL18RAP;PRTN3;CRKL;IL36G;IL12RB2;IRF4;PIK3CD;MAPK11;MAP3K3;CCL22;LCK;IL21R;IRAK3;IL10RA;RPS6KA1;VAV1;IL27RA;FOS;IL4R;IL17RA;INPP5D;PIK3R3;CCR2;NOD1;IL1R1;ITGAM;GATA3;ELK1;DUSP7;VEGFA;IL18;TYK2;CSF1R;IL17RC;DUSP4;CXCL10;TWIST1;CSF1;STX4;IL16;TP53;ALOX5;LIFR;ITGB2;PTPN18;IL6R;CNTFR;AIP;SERPINB2;HCK;LYN;NKIRAS2;MAPK7
REACTOME_SIGNALING_BY_ERYTHROPOIETIN	0.480851	1	-0.344446	-0.979775	23	CRKL;PIK3CG;PIK3CD;VAV1
REACTOME_ACTIVATION_OF_ATR_IN_RESPONSE_TO_REPLICATION_STRESS	0.47707	1	-0.322531	-0.983164	31	CHEK1;MCM2;MCM8;CDK2;CLSPN;MCM7;RFC2;HUS1
REACTOME_RHO_GTPASE_CYCLE	0.485568	1	-0.251073	-0.983885	120	ARHGEF16;CHN2;ARHGAP33;SRGAP1;ARHGAP11A;ARHGAP18;ARHGAP22;ARHGAP28;FAM13B;VAV1;ARHGAP30;RHOF;GNA13;TIAM1;RHOD;ARHGEF18;ITSN1;ARHGDIB;RASGRF2;ARHGAP32;RHOH;ARHGEF6;RAC3;ARAP1;ARHGAP42;ARHGEF3;ARHGAP27;INPP5B;ARHGAP5;ARHGAP15;ARHGEF11;RHOG
REACTOME_ADVANCED_GLYCOSYLATION_ENDPRODUCT_RECEPTOR_SIGNALING	0.481397	1	-0.430799	-0.986266	10	S100B
REACTOME_RESOLUTION_OF_D_LOOP_STRUCTURES_THROUGH_SYNTHESIS_DEPENDENT_STRAND_ANNEALING_SDSA	0.472523	1	-0.363941	-0.986453	19	ATM;BRCA2;WRN;BRIP1;DNA2;RMI2;XRCC3;RMI1;RBBP8
REACTOME_THROMBIN_SIGNALLING_THROUGH_PROTEINASE_ACTIVATED_RECEPTORS_PARS	0.470175	1	-0.343372	-0.987049	24	GNA14;GNA15;GNA13;ARRB2;GNG2;GNG12;GNAQ;GNB1;GNG8
REACTOME_SIGNALLING_TO_ERKS	0.46623	1	-0.324766	-0.989979	31	CRKL;MAPK11;FRS2;MAPK12;NGF;MAPK13
REACTOME_ACTIVATION_OF_BH3_ONLY_PROTEINS	0.464024	1	-0.338576	-0.990591	26	BID;BMF
REACTOME_NUCLEOTIDE_SALVAGE	0.464667	1	-0.360946	-0.991446	20	TK1;UPP2;AMPD2;DCK;GMPR2
REACTOME_O_LINKED_GLYCOSYLATION_OF_MUCINS	0.460339	1	-0.323297	-0.993268	32	GALNT6;GALNT12;B3GNT2;B4GALT5;GCNT1;B3GNTL1;GALNT3;GALNT9;B3GNT3;B3GNT8;ST3GAL1;GALNT15;ST6GAL1;GALNT16;B4GALT6
REACTOME_NOTCH3_INTRACELLULAR_DOMAIN_REGULATES_TRANSCRIPTION	0.457505	1	-0.362901	-0.996818	20	HEYL;IKZF1;PLXND1;KAT2B;HEY1;HEY2;STAT1;NOTCH1;RBPJ;MAML3;HES1
REACTOME_O_LINKED_GLYCOSYLATION	0.448694	1	-0.281052	-0.999282	66	SPON2;SEMA5B;ADAMTS4;GALNT6;ADAMTS15;POMK;GALNT12;B3GNT2;B4GALT5;GCNT1;B3GNTL1;ADAMTS12;GALNT3;GALNT9
REACTOME_ASSEMBLY_AND_CELL_SURFACE_PRESENTATION_OF_NMDA_RECEPTORS	0.449778	1	-0.351946	-1.00111	23	DLG3;CAMK2B;TUBB1;GRIN2A;LIN7C;TUBA4A;APBA1
REACTOME_SUMOYLATION	0.437415	1	-0.248607	-1.0043	148	CDCA8;TOP2A;VDR;PPARA;NR1H3;RNF168;NDC1;NUP93;PIAS3;NUP54;PPARGC1A;SIN3A;WRN;SENP1;MDC1;CBX2;PGR;SUZ12;SCMH1;ESR1;TP53;TP53BP1;THRA;NCOA2;AAAS;PIAS2;BIRC5;UHRF2;NR4A2;NUP43;CBX4;ING2;L3MBTL2;NUP133;SP3;NCOA1;RANGAP1;RING1;MITF;PPARG
REACTOME_SIGNALING_BY_NOTCH1_PEST_DOMAIN_MUTANTS_IN_CANCER	0.439109	1	-0.296009	-1.00525	52	NEURL1B;HDAC9;HEYL;ADAM17;HDAC10;KAT2B;HEY1;JAG2;HEY2;MIB2;PSEN1;PSENEN;TBL1XR1;NOTCH1;SKP1;FBXW7;RBPJ;MAML3;NCOR1;HES1
REACTOME_TOLL_LIKE_RECEPTOR_CASCADES	0.432291	1	-0.253722	-1.00626	130	MAP2K6;TLR7;S100B;RPS6KA5;MAPK11;TLR1;MAP3K1;UNC93B1;IRF7;IRAK3;RPS6KA1;FOS;DNM3;NOD1;ITGAM;ELK1;DUSP7;S100A8;DUSP4;SARM1;TICAM2;S100A9;ITGB2;NKIRAS2;MAPK7;LY96;CTSS;JUN;RPS6KA2;DUSP3;PPP2R1B;MEF2C;TRAF3;ECSIT;MAPK8
REACTOME_ADP_SIGNALLING_THROUGH_P2Y_PURINOCEPTOR_1	0.445804	1	-0.377035	-1.00739	18	GNA14;GNA15
REACTOME_PKMTS_METHYLATE_HISTONE_LYSINES	0.435805	1	-0.316484	-1.00825	38	SUV39H2;SETD1A;ATF7IP;SUZ12;MECOM;RBBP5;SMYD3;EHMT1;EED;SETDB1;SETD3
REACTOME_POSTMITOTIC_NUCLEAR_PORE_COMPLEX_NPC_REFORMATION	0.430636	1	-0.34948	-1.01415	25	RCC1;NDC1;NUP93;NUP54;NUP43;NUP133;TNPO1;RANGAP1;NUP160;NUP205
REACTOME_RAB_GERANYLGERANYLATION	0.422321	1	-0.296555	-1.01434	54	RAB36;RAB44;RAB40B;RAB30;RAB17;RAB3A;RAB26;RAB39B;RAB22A;RAB43;RAB5B;RAB33B
REACTOME_REGULATION_OF_TP53_ACTIVITY_THROUGH_PHOSPHORYLATION	0.417925	1	-0.277677	-1.01436	77	CHEK1;CDK5R1;ATM;MAPK11;CDK2;RFC2;TAF9B;WRN;DYRK2;BRIP1;HUS1;TAF12;DNA2;RMI2;TAF7;TAF6;NUAK1;TP53;TBP;SUPT16H;RPA3;RMI1;RBBP8
REACTOME_INTERLEUKIN_17_SIGNALING	0.417692	1	-0.291348	-1.01667	60	MAP2K6;RPS6KA5;MAPK11;RPS6KA1;FOS;IL17RA;NOD1;ELK1;DUSP7;IL17RC;DUSP4;MAPK7;JUN;RPS6KA2;DUSP3;PPP2R1B;MEF2C;MAPK8;SKP1;TAB2;ATF2;VRK3
REACTOME_E2F_MEDIATED_REGULATION_OF_DNA_REPLICATION	0.430128	1	-0.375216	-1.01702	19	MCM8;PRIM1;CDK1;CCNB1;POLA1;ORC2;PPP2R1B;POLA2;TFDP2
REACTOME_SIGNALING_BY_NOTCH	0.397433	1	-0.249607	-1.01893	160	NEURL1B;DTX1;TACC3;HDAC9;HEYL;DTX4;ADAM17;IKZF1;NOTCH2;TLE3;PRKCI;PLXND1;HDAC10;FURIN;ARRB2;KAT2B;HEY1;JAG2;TP53;MFNG;SIRT6;POGLUT1;HEY2;JUN;MIB2;STAT1;PSEN1;PSME3;AGO1;TLE2;SMAD3;TNRC6C;PSENEN;PSMB10;TBL1XR1;NOTCH1;MDK;SKP1;FBXW7;HIF1A;TFDP2;POFUT1;RBPJ;PSMF1;PSMD5;YBX1;MAML3
REACTOME_REGULATION_OF_RUNX2_EXPRESSION_AND_ACTIVITY	0.408429	1	-0.289895	-1.02156	63	PSMA8;RUNX2;PPARGC1B
REACTOME_NOREPINEPHRINE_NEUROTRANSMITTER_RELEASE_CYCLE	0.438517	1	-0.446466	-1.02213	10	RAB3A;SLC22A1;PPFIA3;SLC22A2
REACTOME_FCERI_MEDIATED_CA_2_MOBILIZATION	0.409029	1	-0.34515	-1.02747	28	GRAP2;SYK;ITK;VAV1;LAT
REACTOME_DNA_DOUBLE_STRAND_BREAK_RESPONSE	0.405021	1	-0.33068	-1.02972	34	ATM;RNF168;EYA3;MDC1;EYA1;TP53;TP53BP1
REACTOME_NOTCH2_ACTIVATION_AND_TRANSMISSION_OF_SIGNAL_TO_THE_NUCLEUS	0.4123	1	-0.380072	-1.03018	19	NEURL1B;NOTCH2;JAG2;MIB2;PSEN1;PSENEN;MDK
REACTOME_ACTIVATION_OF_GENE_EXPRESSION_BY_SREBF_SREBP	0.398809	1	-0.319739	-1.03052	40	PPARA;LSS;CARM1;NFYA;MVD;ACACA;MED1;NCOA2;ACACB;PMVK;TGS1;SP1;HELZ2;NCOA1;TBL1XR1
REACTOME_NOTCH3_ACTIVATION_AND_TRANSMISSION_OF_SIGNAL_TO_THE_NUCLEUS	0.403958	1	-0.362976	-1.03249	23	NEURL1B;TACC3
REACTOME_REPRODUCTION	0.392147	1	-0.313294	-1.03414	45	MLH3;ATM;CDK2;SYCE2;TEX15;BRCA2;TERF1
REACTOME_ENDOGENOUS_STEROLS	0.414541	1	-0.412707	-1.03442	14	POMC;FDXR;NCOA2;AHR;CYP4V2;NCOA1
REACTOME_SULFUR_AMINO_ACID_METABOLISM	0.40498	1	-0.376861	-1.03516	20	SLC25A10;SUOX;ENOPH1;GOT1
REACTOME_TELOMERE_MAINTENANCE	0.391119	1	-0.325395	-1.03664	38	PRIM1;WRAP53;TERF1;RFC2;WRN;DNA2;DKC1;RPA3;POLA1;TERF2IP;RFC1;POLA2;NOP10;POLD2;CHTF8;PCNA;POLD1;TERF2;RFC3
REACTOME_EXTENSION_OF_TELOMERES	0.391119	1	-0.325395	-1.03664	38	PRIM1;WRAP53;TERF1;RFC2;WRN;DNA2;DKC1;RPA3;POLA1;TERF2IP;RFC1;POLA2;NOP10;POLD2;CHTF8;PCNA;POLD1;TERF2;RFC3
REACTOME_METABOLISM_OF_NUCLEOTIDES	0.371933	1	-0.280457	-1.03801	83	TK1;DNPH1;NUDT15;AK8;PFAS;UPB1;UPP2;RRM2;AK6;NUDT13;ENTPD7;AMPD2;NUDT5;SAMHD1;NME1;DCK;GMPR2;DCTPP1;GLRX;TYMS;CTPS2;DUT;GDA;ATIC
REACTOME_RETROGRADE_NEUROTROPHIN_SIGNALLING	0.41674	1	-0.454288	-1.04004	10	DNM3;NGF;DNAL4;AP2A2
REACTOME_TRANSCRIPTIONAL_REGULATION_BY_TP53	0.313335	1	-0.236199	-1.04057	307	MAP2K6;ARID3A;CHEK1;CDK5R1;BID;PRR5;ING5;PRDM1;CCNE1;BTG2;ATM;MAPK11;CDK2;PRMT5;IGFBP3;ERCC2;CCNE2;GTF2H2;CARM1;DDB2;FOS;TSC2;GADD45A;STEAP3;NELFA;CCNK;SCO2;RFC2;TAF9B;WRN;DYRK2;BRIP1;HUS1;GTF2H3;TAF12;MDC1;TACO1;DNA2;CDK1;GPX2;RMI2;RRAGB;TAF7;TAF6;NUAK1;TP53;MLST8;BRPF3;CCNB1;CNOT6;GTF2H1;TBP;BIRC5;MEAF6;SUPT16H;JUN;SESN1;POLR2A;RPA3;RBL1;CTDP1;PCBP4;RMI1;ING2;RBBP8;AGO1;PPP2R1B;TNRC6C;AKT3;CDKN…
REACTOME_INTERCONVERSION_OF_NUCLEOTIDE_DI_AND_TRIPHOSPHATES	0.387717	1	-0.357033	-1.04459	26	AK8;RRM2;AK6;NUDT13;NME1;DCTPP1;GLRX;TYMS;CTPS2;DUT
REACTOME_TP53_REGULATES_TRANSCRIPTION_OF_GENES_INVOLVED_IN_CYTOCHROME_C_RELEASE	0.399145	1	-0.409875	-1.04566	15	BID;ATM;STEAP3;TP53
REACTOME_REGULATION_OF_LIPID_METABOLISM_BY_PPARALPHA	0.338665	1	-0.272962	-1.05036	106	NPAS2;ARNTL;PPARGC1B;PPARA;NR1H3;ANGPTL4;CARM1;PPARGC1A;CLOCK;SIN3A;MED11;NFYA;MED1;AGT;MED26;NCOA2;NCOA3;MED20;AHR;ABCA1;MED6;TGS1;SP1;HELZ2;TNFRSF21;NCOA1;NRF1;SLC27A1;TBL1XR1;THRAP3;PPARG
REACTOME_GPCR_LIGAND_BINDING	0.326168	1	-0.259288	-1.05052	151	P2RY10;CXCR2;LPAR2;CXCR3;POMC;P2RY13;CXCR5;CYSLTR1;CX3CL1;LPAR4;XCR1;LPAR3;S1PR2;CCL22;GPER1;GPR18;ADRA1A;PTH1R;ADM;PTGER4;CCR2;CXCL12;LPAR6;C5;CXCR4;FZD5;AGT;CXCL10;FFAR2;GHRL;GLP1R;NTS
REACTOME_DNA_REPLICATION_PRE_INITIATION	0.34864	1	-0.289109	-1.05139	75	CDT1;PSMA8;MCM2;MCM8;CDK2;PRIM1;E2F2
REACTOME_SYNTHESIS_OF_IP3_AND_IP4_IN_THE_CYTOSOL	0.382938	1	-0.383198	-1.05257	20	PLD4;INPP5D;PLCB3;PLCB2;PLCE1;INPP5B;PLCB1
REACTOME_OVARIAN_TUMOR_DOMAIN_PROTEASES	0.367187	1	-0.34327	-1.05463	32	TNIP3;OTUB2;APC;NOD1;CDK1;RNF128;ESR1;TP53;TNIP1;TRIM25;YOD1;TRAF3
REACTOME_NOD1_2_SIGNALING_PATHWAY	0.365423	1	-0.343678	-1.05589	32	MAP2K6;MAPK11;MAPK12;NOD1;MAPK13
REACTOME_N_GLYCAN_ANTENNAE_ELONGATION_IN_THE_MEDIAL_TRANS_GOLGI	0.37707	1	-0.379696	-1.0565	21	MGAT3;CHST10;B4GALT5;MGAT4B;CHST8;B4GALT4
REACTOME_ACTIVATION_OF_BAD_AND_TRANSLOCATION_TO_MITOCHONDRIA	0.383181	1	-0.414984	-1.0587	15	BID
REACTOME_MITOTIC_G1_PHASE_AND_G1_S_TRANSITION	0.315046	1	-0.266458	-1.05911	132	TK1;CDT1;TOP2A;MCM2;DHFR;CCNE1;CDKN2B;MCM8;CDK2;LIN54;PRIM1;E2F2;CCNE2;RRM2;LIN9;MCM7;CDK1;CCNB1;MCM3;LYN;TYMS;RPA3;RBL1;POLE4;POLA1;PSME3;ORC2;PPP2R1B;AKT3;POLA2;CDKN1A;MAX;PSMB10;CCND3
REACTOME_G_BETA_GAMMA_SIGNALLING_THROUGH_PI3KGAMMA	0.371164	1	-0.391571	-1.06134	19	PIK3CG;PIK3R6;GNG2;AKT3;GNG12;GNB1;GNG8;GNG11
REACTOME_MEIOSIS	0.350891	1	-0.328016	-1.06176	41	MLH3;ATM;CDK2;SYCE2;TEX15;BRCA2;TERF1
REACTOME_SIGNALING_BY_NOTCH1_HD_DOMAIN_MUTANTS_IN_CANCER	0.382875	1	-0.432427	-1.06341	13	NEURL1B;ADAM17;JAG2;MIB2;NOTCH1
REACTOME_TOLL_LIKE_RECEPTOR_9_TLR9_CASCADE	0.322392	1	-0.287611	-1.06449	83	MAP2K6;TLR7;S100B;RPS6KA5;MAPK11;MAP3K1;IRF7;RPS6KA1;FOS;NOD1;ELK1;DUSP7;DUSP4;TICAM2;NKIRAS2;MAPK7;LY96;JUN;RPS6KA2;DUSP3;PPP2R1B;MEF2C;ECSIT;MAPK8;SKP1;TAB2;ATF2;VRK3
REACTOME_KERATAN_SULFATE_KERATIN_METABOLISM	0.357798	1	-0.360908	-1.0651	27	CHST2;LUM;SLC35D2;B3GNT2;B4GALT5;B4GALT4;B3GNT3
REACTOME_ORC1_REMOVAL_FROM_CHROMATIN	0.327515	1	-0.303126	-1.06819	63	CDT1;PSMA8;MCM2;MCM8;CDK2
REACTOME_DNA_STRAND_ELONGATION	0.344238	1	-0.348509	-1.07073	32	MCM2;MCM8;PRIM1;GINS3;GINS2;MCM7;RFC2;DNA2;GINS1;MCM3;RPA3;POLA1;RFC1;POLA2;POLD2
REACTOME_GLYOXYLATE_METABOLISM_AND_GLYCINE_DEGRADATION	0.354836	1	-0.372575	-1.071	24	DDO;GNMT
REACTOME_ACTIVATION_OF_THE_PRE_REPLICATIVE_COMPLEX	0.347792	1	-0.363498	-1.07274	27	CDT1;MCM2;MCM8;CDK2;PRIM1;MCM7;MCM3;RPA3;POLE4;POLA1;ORC2;POLA2
REACTOME_SWITCHING_OF_ORIGINS_TO_A_POST_REPLICATIVE_STATE	0.307521	1	-0.291599	-1.07475	81	CDT1;PSMA8;MCM2;CCNE1;MCM8;CDK2;CCNE2;CDC23;MCM7
REACTOME_ASSEMBLY_OF_THE_PRE_REPLICATIVE_COMPLEX	0.31643	1	-0.306127	-1.07532	62	CDT1;PSMA8;MCM2;MCM8;E2F2
REACTOME_ASSEMBLY_OF_ACTIVE_LPL_AND_LIPC_LIPASE_COMPLEXES	0.371297	1	-0.457802	-1.07596	11	CIDEC;ANGPTL4;FURIN;LIPC
REACTOME_REGULATION_OF_SIGNALING_BY_CBL	0.351367	1	-0.39234	-1.07768	20	SYK;CRKL;PIK3CD;VAV1;PIK3R3;HCK;LYN
REACTOME_UNWINDING_OF_DNA	0.365992	1	-0.448018	-1.07827	12	MCM2;MCM8;GINS3;GINS2;MCM7;GINS1;MCM3
REACTOME_DEFECTS_IN_VITAMIN_AND_COFACTOR_METABOLISM	0.350288	1	-0.404581	-1.08099	18	MMAB;MCCC1;MCCC2;ACACA
REACTOME_UPTAKE_AND_ACTIONS_OF_BACTERIAL_TOXINS	0.338067	1	-0.385778	-1.08575	22	MAP2K6;STX1B
REACTOME_PI_3K_CASCADE_FGFR4	0.358263	1	-0.476653	-1.09124	10	FGF18;FRS2;FGF1
REACTOME_INTERLEUKIN_2_FAMILY_SIGNALING	0.316085	1	-0.348342	-1.0914	35	HAVCR2;SYK;PIK3CD;LCK;IL21R;INPP5D;PIK3R3
REACTOME_UPTAKE_AND_FUNCTION_OF_ANTHRAX_TOXINS	0.356581	1	-0.477334	-1.0928	10	MAP2K6;FURIN;ANTXR2
REACTOME_PROCESSING_OF_DNA_DOUBLE_STRAND_BREAK_ENDS	0.292571	1	-0.32296	-1.09677	52	CHEK1;ATM;CDK2;CLSPN;RNF168;RFC2;WRN;BRIP1;HUS1;MDC1;DNA2;RMI2;TP53BP1;SIRT6;RPA3;RMI1;RBBP8
REACTOME_ESTROGEN_DEPENDENT_GENE_EXPRESSION	0.261495	1	-0.297375	-1.10063	83	CITED1;CXXC5;CARM1;FOS;TLE3;FOSB;CXCL12;GATA3;KAT2B;MED1;MYB;PGR;ESR1;NCOA2;NCOA3;KCTD6;TBP;JUN;POLR2A;SP1;AGO1;TNRC6C;GTF2A1;NCOA1
REACTOME_REGULATION_OF_TP53_ACTIVITY_THROUGH_METHYLATION	0.333453	1	-0.439917	-1.10263	14	ATM;PRMT5;TP53;EHMT1
REACTOME_TRANSPORT_OF_INORGANIC_CATIONS_ANIONS_AND_AMINO_ACIDS_OLIGOPEPTIDES	0.276073	1	-0.314898	-1.10291	61	SLC4A4;SLC25A10;SLC8A1;SLC43A1;SLC9A9;SLC6A14;SLC1A6;SLC8B1;SLC24A4;SLC25A26;SLC16A10;SLC8A2
REACTOME_PRESYNAPTIC_FUNCTION_OF_KAINATE_RECEPTORS	0.331552	1	-0.440606	-1.10435	14	PLCB3;PLCB2;PLCB1;GNG2;GNG12;GNB1;GNG8;GNG11
REACTOME_NUCLEAR_RECEPTOR_TRANSCRIPTION_PATHWAY	0.292928	1	-0.348814	-1.10603	37	RORB;RXRG;VDR;PPARA;NR1H3;NR4A1;MED1;PGR;NR6A1;ESR1;THRA
REACTOME_FOXO_MEDIATED_TRANSCRIPTION	0.274159	1	-0.32126	-1.10656	56	POMC;ABCA6;FOXO4;GADD45A;PPARGC1A;SIN3A;NFYA;KAT2B;AGRP;FOXO6
REACTOME_SYNTHESIS_OF_IP2_IP_AND_INS_IN_THE_CYTOSOL	0.333837	1	-0.459996	-1.10709	12	IMPA2;MTMR7;INPP5B;ISYNA1;IMPA1;INPP4B;OCRL;INPP5A
REACTOME_POLO_LIKE_KINASE_MEDIATED_EVENTS	0.323693	1	-0.463915	-1.11653	12	LIN54;CENPF;LIN9;CCNB1;FOXM1
REACTOME_METABOLISM_OF_AMINO_ACIDS_AND_DERIVATIVES	0.159337	1	-0.258518	-1.11683	257	DDO;CRYM;IL4I1;GNMT;PSMA8;SLC25A10;PNMT;ALDH18A1;MCCC1;ASS1;SUOX;SERINC5;ENOPH1;SLC6A7;GPT;BCAT2;EEFSEC
REACTOME_TP53_REGULATES_TRANSCRIPTION_OF_CELL_CYCLE_GENES	0.260671	1	-0.346945	-1.12814	42	ARID3A;CCNE1;BTG2;CDK2;CCNE2;CARM1;GADD45A;CDK1;TP53;CCNB1;CNOT6;RBL1;PCBP4;CDKN1A
REACTOME_CELLULAR_SENESCENCE	0.202886	1	-0.290189	-1.12866	114	MAP2K6;CCNE1;ATM;MAPK11;CDKN2B;CDK2;E2F2;CCNE2;RPS6KA1;FOS;CEBPB;TERF1;CDC23;CABIN1;CBX2;SUZ12;SCMH1;TP53;ID1;MAPK7;JUN;CBX4;SP1;TERF2IP;RPS6KA2;AGO1;TNRC6C;CDKN1A;EHMT1;EED;MAPK8;TNIK;RING1;MINK1;TFDP2
REACTOME_INTERFERON_ALPHA_BETA_SIGNALING	0.261123	1	-0.34875	-1.12887	41	IFIT3;IRF4;IRF7;GBP2;SAMHD1;TYK2;ISG15;IFNAR1;PTPN1;STAT1;RNASEL;ABCE1;USP18;IFITM3;STAT2;ISG20
REACTOME_POTASSIUM_CHANNELS	0.261036	1	-0.348766	-1.12892	41	KCNC4;KCNJ15;KCNA2;KCNQ4;KCNJ12;KCNAB1;KCNK3;KCNB2;KCNQ5;KCNMB2;KCNN3;KCND1;KCNJ2
REACTOME_REGULATION_OF_TP53_ACTIVITY	0.191083	1	-0.283158	-1.12895	135	MAP2K6;CHEK1;CDK5R1;PRR5;ING5;PRDM1;ATM;MAPK11;CDK2;PRMT5;RFC2;TAF9B;WRN;DYRK2;BRIP1;HUS1;TAF12;DNA2;CDK1;RMI2;TAF7;TAF6;NUAK1;TP53;MLST8;BRPF3;TBP;MEAF6;SUPT16H;RPA3;RMI1;ING2;RBBP8;PPP2R1B;AKT3;KAT6A;CDK5;EHMT1;BRD1;CSNK2A1;PIP4K2B
REACTOME_MEIOTIC_RECOMBINATION	0.293327	1	-0.416859	-1.12989	19	MLH3;ATM;CDK2;TEX15;BRCA2
REACTOME_CD28_CO_STIMULATION	0.265075	1	-0.372355	-1.13504	31	GRAP2;MAP3K14;PRR5;LCK;THEM4;CD28;VAV1;PIK3R3
REACTOME_O_GLYCOSYLATION_OF_TSR_DOMAIN_CONTAINING_PROTEINS	0.271194	1	-0.385442	-1.1375	27	SPON2;SEMA5B;ADAMTS4;ADAMTS15
REACTOME_PROCESSIVE_SYNTHESIS_ON_THE_LAGGING_STRAND	0.289217	1	-0.447263	-1.14105	15	PRIM1;DNA2;RPA3;POLA1;POLA2;POLD2;PCNA;POLD1
REACTOME_AKT_PHOSPHORYLATES_TARGETS_IN_THE_NUCLEUS	0.304536	1	-0.49957	-1.14371	10	FOXO4;NR4A1;FOXO6;AKT3
REACTOME_SUMOYLATION_OF_TRANSCRIPTION_FACTORS	0.280409	1	-0.450411	-1.14908	15	PIAS3;TP53;TP53BP1;PIAS2;SP3;MITF
REACTOME_PROTEIN_METHYLATION	0.285489	1	-0.479363	-1.15371	12	VCPKMT;PRMT3;CAMKMT
REACTOME_BMAL1_CLOCK_NPAS2_ACTIVATES_CIRCADIAN_GENE_EXPRESSION	0.255022	1	-0.407105	-1.15801	23	NPAS2;ARNTL;PPARA;ARNTL2;CARM1;CLOCK;MED1
REACTOME_NUCLEOTIDE_LIKE_PURINERGIC_RECEPTORS	0.289654	1	-0.505991	-1.15841	10	P2RY10;P2RY13;LPAR4
REACTOME_SIGNALING_BY_NOTCH1	0.198522	1	-0.32727	-1.15998	65	NEURL1B;DTX1;HDAC9;HEYL;DTX4;ADAM17;TLE3;HDAC10;ARRB2;KAT2B;HEY1;JAG2;HEY2;MIB2;PSEN1;TLE2;PSENEN;TBL1XR1;NOTCH1;SKP1;FBXW7;HIF1A;RBPJ
REACTOME_SIGNALING_BY_NOTCH3	0.22059	1	-0.35738	-1.16207	42	NEURL1B;TACC3;HEYL;IKZF1;PLXND1;KAT2B;HEY1;JAG2;HEY2;MIB2;STAT1;PSEN1;PSENEN;NOTCH1;RBPJ;YBX1;MAML3;EGFR;HES1
REACTOME_TRANSPORT_OF_VITAMINS_NUCLEOSIDES_AND_RELATED_MOLECULES	0.247098	1	-0.397316	-1.16245	26	SLC29A4;SLCO4C1;SLC5A6;SLCO2B1;SLC35D2
REACTOME_INTERLEUKIN_6_FAMILY_SIGNALING	0.260777	1	-0.441567	-1.164	17	OSM;TYK2;LIFR;IL6R;CNTFR;STAT1
REACTOME_NUCLEAR_EVENTS_KINASE_AND_TRANSCRIPTION_FACTOR_ACTIVATION	0.204797	1	-0.343587	-1.16682	52	CDK5R1;RPS6KA5;MAPK11;RPS6KA1;FOS;FOSB;ID2;ELK1;ID3;DUSP7;DUSP4;ID1;MAPK7;RPS6KA2;DUSP3;PPP2R1B;MEF2C;CDK5
REACTOME_CONSTITUTIVE_SIGNALING_BY_AKT1_E17K_IN_CANCER	0.239115	1	-0.399854	-1.16988	26	PRR5;FOXO4;TSC2;NR4A1;FOXO6;MLST8;AKT3;CDKN1A;MTOR;BAD;CASP9
REACTOME_MITOCHONDRIAL_IRON_SULFUR_CLUSTER_BIOGENESIS	0.266209	1	-0.487029	-1.17216	12	FDXR;NFS1
REACTOME_SUMOYLATION_OF_DNA_REPLICATION_PROTEINS	0.213618	1	-0.363717	-1.17226	40	CDCA8;TOP2A;NDC1;NUP93;PIAS3;NUP54
REACTOME_TP53_REGULATES_TRANSCRIPTION_OF_DNA_REPAIR_GENES	0.192696	1	-0.340624	-1.17326	56	CHEK1;ATM;ERCC2;GTF2H2;DDB2;FOS;NELFA;CCNK;GTF2H3;MDC1;TP53;GTF2H1;SUPT16H;JUN;POLR2A;CTDP1
REACTOME_CD28_DEPENDENT_PI3K_AKT_SIGNALING	0.243114	1	-0.421883	-1.17388	21	MAP3K14;PRR5;LCK;THEM4;CD28;PIK3R3
REACTOME_TRANSCRIPTIONAL_REGULATION_BY_THE_AP_2_TFAP2_FAMILY_OF_TRANSCRIPTION_FACTORS	0.231926	1	-0.402402	-1.17733	26	CITED1;KCTD1;KCTD15;VEGFA;ESR1;CITED4;ERBB2;APOE;CDKN1A
REACTOME_G2_M_DNA_DAMAGE_CHECKPOINT	0.195271	1	-0.349566	-1.17828	50	CHEK1;ATM;RNF168;RFC2;WRN;BRIP1;HUS1;MDC1;DNA2;CDK1;RMI2;TP53;TP53BP1;CCNB1;RPA3;RMI1;RBBP8
REACTOME_G_PROTEIN_ACTIVATION	0.239151	1	-0.443521	-1.18503	18	GNAT2;POMC
REACTOME_INTERLEUKIN_2_SIGNALING	0.257762	1	-0.504424	-1.18553	11	SYK;LCK
REACTOME_OLFACTORY_SIGNALING_PATHWAY	0.245605	1	-0.496533	-1.19503	12	OR51E1;REEP6;REEP1
REACTOME_CHEMOKINE_RECEPTORS_BIND_CHEMOKINES	0.197858	1	-0.397205	-1.20219	30	CXCR2;CXCR3;CXCR5;CX3CL1;XCR1;CCL22;CCR2;CXCL12;CXCR4;CXCL10
REACTOME_TRANSPORT_OF_BILE_SALTS_AND_ORGANIC_ACIDS_METAL_IONS_AND_AMINE_COMPOUNDS	0.17305	1	-0.367358	-1.20692	44	SLC22A4;SLC22A3;SLC6A14;SLC6A7;SLC14A1;SLC41A2;SLC5A3;SLC39A3;SLC30A6;SLC6A2;SLC22A1;SLC22A2
REACTOME_CONDENSATION_OF_PROPHASE_CHROMOSOMES	0.242107	1	-0.52858	-1.21012	10	CDK1;PHF8;CCNB1;NCAPD3;SMC2
REACTOME_SYNTHESIS_OF_PIPS_AT_THE_LATE_ENDOSOME_MEMBRANE	0.233847	1	-0.515363	-1.21124	11	FIG4;VAC14;MTMR4;MTMR7
REACTOME_DEGRADATION_OF_CYSTEINE_AND_HOMOCYSTEINE	0.232819	1	-0.515861	-1.21241	11	SLC25A10;SUOX
REACTOME_BRANCHED_CHAIN_AMINO_ACID_CATABOLISM	0.207883	1	-0.441742	-1.21338	20	MCCC1;BCAT2;MCCC2;PPM1K;BCKDHB;ECHS1
REACTOME_COSTIMULATION_BY_THE_CD28_FAMILY	0.153987	1	-0.353781	-1.21459	55	CTLA4;GRAP2;CD274;MAP3K14;PRR5;LCK;THEM4;CD28;VAV1;CD3E;PIK3R3;CSK;CD3D
REACTOME_G1_S_DNA_DAMAGE_CHECKPOINTS	0.145941	1	-0.346847	-1.2148	61	PSMA8;CHEK1;CCNE1;ATM;CDK2;CCNE2
REACTOME_GOLGI_CISTERNAE_PERICENTRIOLAR_STACK_REORGANIZATION	0.227606	1	-0.505095	-1.21564	12	CDK1;CCNB1;GORASP1;USO1;RAB1B;MAPK1;MAPK3
REACTOME_OXIDATIVE_STRESS_INDUCED_SENESCENCE	0.150927	1	-0.351742	-1.2158	57	MAP2K6;MAPK11;CDKN2B;E2F2;FOS;CBX2;SUZ12;SCMH1;TP53;JUN;CBX4;AGO1;TNRC6C;EED;MAPK8;TNIK;RING1;MINK1;TFDP2;MAP4K4
REACTOME_REGULATION_OF_IFNA_SIGNALING	0.226514	1	-0.505701	-1.2171	12	TYK2;IFNAR1;PTPN1;STAT1;USP18;STAT2
REACTOME_NUCLEOBASE_CATABOLISM	0.193024	1	-0.412428	-1.21714	27	DNPH1;NUDT15;UPB1;UPP2;ENTPD7;NUDT5;SAMHD1
REACTOME_ANTIGEN_ACTIVATES_B_CELL_RECEPTOR_BCR_LEADING_TO_GENERATION_OF_SECOND_MESSENGERS	0.181403	1	-0.412323	-1.22743	28	SYK;ORAI2;PIK3CD;SH3KBP1;DAPP1;VAV1
REACTOME_CLASS_A_1_RHODOPSIN_LIKE_RECEPTORS	0.0966087	1	-0.316417	-1.22788	112	P2RY10;CXCR2;LPAR2;CXCR3;POMC;P2RY13;CXCR5;CYSLTR1;CX3CL1;LPAR4;XCR1;LPAR3;S1PR2;CCL22;GPER1;GPR18;ADRA1A;PTGER4;CCR2;CXCL12;LPAR6;C5;CXCR4;AGT;CXCL10;FFAR2;GHRL;NTS
REACTOME_TRANSCRIPTION_OF_E2F_TARGETS_UNDER_NEGATIVE_CONTROL_BY_DREAM_COMPLEX	0.201805	1	-0.465963	-1.22832	17	TOP2A;LIN54;LIN9;RBL1;MAX;TFDP2;E2F5;RBL2;PCNA
REACTOME_IL_6_TYPE_CYTOKINE_RECEPTOR_LIGAND_INTERACTIONS	0.214567	1	-0.524723	-1.23324	11	OSM;TYK2;LIFR;CNTFR
REACTOME_ACTIVATED_NOTCH1_TRANSMITS_SIGNAL_TO_THE_NUCLEUS	0.160318	1	-0.42962	-1.25697	26	NEURL1B;DTX1;DTX4;ADAM17;ARRB2;JAG2;MIB2;PSEN1;PSENEN;NOTCH1
REACTOME_KERATAN_SULFATE_BIOSYNTHESIS	0.16612	1	-0.453864	-1.26287	21	CHST2;LUM;SLC35D2;B3GNT2;B4GALT5;B4GALT4;B3GNT3
REACTOME_TP53_REGULATES_TRANSCRIPTION_OF_GENES_INVOLVED_IN_G1_CELL_CYCLE_ARREST	0.186016	1	-0.539955	-1.26904	11	ARID3A;CCNE1;CDK2;CCNE2
REACTOME_TRAFFICKING_AND_PROCESSING_OF_ENDOSOMAL_TLR	0.184365	1	-0.558655	-1.27898	10	TLR7;UNC93B1
REACTOME_G0_AND_EARLY_G1	0.143294	1	-0.452662	-1.2876	23	TOP2A;CCNE1;CDK2;LIN54;CCNE2;LIN9;CDK1
REACTOME_PURINE_CATABOLISM	0.157901	1	-0.496507	-1.28876	16	DNPH1;NUDT15
REACTOME_RORA_ACTIVATES_GENE_EXPRESSION	0.149841	1	-0.492585	-1.29849	17	PPARA;CARM1;MED1;NCOA2;TGS1;HELZ2;NCOA1;TBL1XR1
REACTOME_YAP1_AND_WWTR1_TAZ_STIMULATED_GENE_EXPRESSION	0.163317	1	-0.552724	-1.29905	11	RUNX2;KAT2B;GATA4;TEAD2;TEAD3;TEAD1;TBX5
REACTOME_PD_1_SIGNALING	0.149886	1	-0.520845	-1.30547	14	CD274;LCK;CD3E;CSK;CD3D
REACTOME_BIOTIN_TRANSPORT_AND_METABOLISM	0.157003	1	-0.556391	-1.30767	11	MCCC1;SLC5A6;MCCC2;ACACA;ACACB
REACTOME_FCERI_MEDIATED_MAPK_ACTIVATION	0.119175	1	-0.435656	-1.30771	29	GRAP2;SYK;MAP3K1;VAV1;FOS;LAT;FCER1G;LYN;LCP2;JUN
REACTOME_TP53_REGULATES_TRANSCRIPTION_OF_GENES_INVOLVED_IN_G2_CELL_CYCLE_ARREST	0.14211	1	-0.513882	-1.311	15	CARM1;GADD45A;CDK1;TP53;CCNB1;RBL1;TFDP2;SFN;RBL2;PCNA
REACTOME_CHK1_CHK2_CDS1_MEDIATED_INACTIVATION_OF_CYCLIN_B_CDK1_COMPLEX	0.150227	1	-0.560569	-1.31749	11	CHEK1;CDK1;CCNB1
REACTOME_THE_ROLE_OF_NEF_IN_HIV_1_REPLICATION_AND_DISEASE_PATHOGENESIS	0.118411	1	-0.454139	-1.31785	25	AP1S3;LCK;CD28;PACS1;HCK;AP1B1;DOCK2;CD4;AP2A2;ELMO1;ATP6V1H
REACTOME_ACTIVATION_OF_KAINATE_RECEPTORS_UPON_GLUTAMATE_BINDING	0.123856	1	-0.490211	-1.32871	19	DLG3;PLCB3;PLCB2;PLCB1;NCALD;GNG2;GNG12;GNB1;GNG8;GNG11
REACTOME_ERK_MAPK_TARGETS	0.112263	1	-0.475577	-1.33849	22	RPS6KA5;MAPK11;RPS6KA1;ELK1;DUSP7;DUSP4;MAPK7;RPS6KA2;DUSP3;PPP2R1B;MEF2C
REACTOME_CREB1_PHOSPHORYLATION_THROUGH_NMDA_RECEPTOR_MEDIATED_ACTIVATION_OF_RAS_SIGNALING	0.11873	1	-0.51037	-1.34537	17	DLG3;RPS6KA1;CAMK2B;RASGRF2;RPS6KA2
REACTOME_RAS_ACTIVATION_UPON_CA2_INFLUX_THROUGH_NMDA_RECEPTOR	0.136167	1	-0.587759	-1.34561	10	DLG3;CAMK2B;RASGRF2
REACTOME_GAMMA_CARBOXYLATION_HYPUSINE_FORMATION_AND_ARYLSULFATASE_ACTIVATION	0.0992079	1	-0.465355	-1.3504	25	DPH2;ARSG;FN3KRP;DPH7;FURIN;EIF5A2
REACTOME_SUMOYLATION_OF_INTRACELLULAR_RECEPTORS	0.0921869	1	-0.464879	-1.36012	26	VDR;PPARA;NR1H3;PIAS3;PGR;ESR1;THRA;PIAS2;NR4A2
REACTOME_INWARDLY_RECTIFYING_K_CHANNELS	0.102357	1	-0.520819	-1.37292	17	KCNJ15;KCNJ12;KCNJ2;GABBR1;GNG2;GNG12;GNB1;GNG8;ABCC9;GNG11
REACTOME_BASE_EXCISION_REPAIR_AP_SITE_FORMATION	0.102581	1	-0.539061	-1.37524	15	NEIL1;UNG;TERF1;TERF2IP;MUTYH;MBD4
REACTOME_GENERATION_OF_SECOND_MESSENGER_MOLECULES	0.0852685	1	-0.480991	-1.38265	24	GRAP2;WAS;ITK;LCK;LAT;CD3E;CD3D
REACTOME_PROLONGED_ERK_ACTIVATION_EVENTS	0.086569	1	-0.575971	-1.41641	13	CRKL;FRS2;NGF
REACTOME_VOLTAGE_GATED_POTASSIUM_CHANNELS	0.0819589	1	-0.555963	-1.41836	15	KCNC4;KCNA2;KCNQ4;KCNAB1;KCNB2;KCNQ5;KCND1
REACTOME_SYNTHESIS_SECRETION_AND_DEACYLATION_OF_GHRELIN	0.0780188	1	-0.61416	-1.44344	11	BCHE;PLA2G7;GHRL;CRHR2

## Sheet: d_MyoTF
Transcription factors	Ctrl.AVG.RANK	IH.AVG.RANK	Class
Aebp1	2	1	overlap
Id4	7	2	overlap
Nfia	1	3	overlap
Prdm6	4	4	overlap
Smarcd3	18	5	overlap
Heyl	7	6	overlap
Zbtb20	11	7	overlap
Nr2f2	6	8	overlap
Zfhx3	2	9	overlap
Pbx1	5	10	overlap
Dbp		11	IH_only
Klf9	12	12	overlap
Prrx1	19	13	overlap
Jund	51	14	overlap
Tsc22d1	15	15	overlap
Hlf		15	IH_only
Osr1	13	17	overlap
Foxc1	23	18	overlap
Tbx5	20	19	overlap
Creb5	29	19	overlap
Nfix	10	21	overlap
Nr1d1	26	22	overlap
Rora	27	23	overlap
Zbtb38	42	23	overlap
Klf2	24	25	overlap
Thra	9	26	overlap
Atf5		27	IH_only
Drap1	32	28	overlap
Zfp36l1	38	28	overlap
Hoxb2	17	30	overlap
Ski	20	31	overlap
Lrrfip1		32	IH_only
Nfib	13	33	overlap
Epas1	34	34	overlap
Nr3c1		35	IH_only
Nfic	25	36	overlap
Fos	48	37	overlap
Ybx1	16	38	overlap
Nr1d2		39	IH_only
Jun	37	40	overlap
Pbrm1		41	IH_only
Id3	36	42	overlap
Aff4		43	IH_only
Creb3l2		44	IH_only
Atf3		45	IH_only
Id2	22	46	overlap
Arid5a		47	IH_only
Arid5b		48	IH_only
Ebf1	31	49	overlap
Klf6	53	50	overlap
Zeb2	45	51	overlap
Id1	39	52	overlap
Hif1a	46	53	overlap
Mef2a		54	IH_only
Mafk	52	55	overlap
Klf7		56	IH_only
Pcbp2	40	57	overlap
Eno1	43	58	overlap
Klf13	50	59	overlap
Hnrnpk	55	60	overlap
Pcbp1	47	61	overlap
Foxp1	54	62	overlap
Pura	41	63	overlap
Bola3		63	IH_only
Tcf25		65	IH_only
Zfp706	57	66	overlap
Tax1bp1		67	IH_only
Mef2c	58	68	overlap
Ncor1	60	69	overlap
Matr3		70	IH_only
Kmt2e		71	IH_only
Gata6	27		ctrl_only
Foxs1	30		ctrl_only
Cebpb	32		ctrl_only
Hey2	35		ctrl_only
Zfp703	44		ctrl_only
Fosl2	49		ctrl_only
Nr4a1	56		ctrl_only
Nfkbia	59		ctrl_only
