# Supplementary figures and images for: Short-term exposure to intermittent hypoxia leads to changes in gene expression seen in chronic pulmonary disease
Source: eLife journal article supplement (doi:10.7554/elife.63003), 2021-02-18

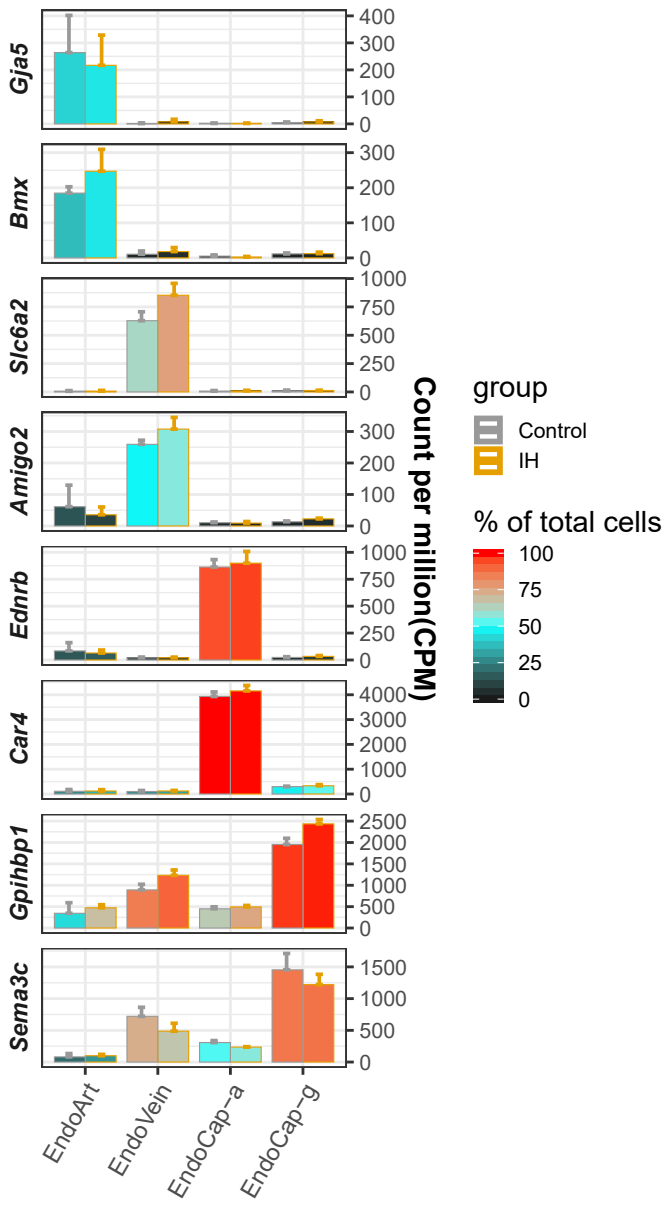

Supplement: supp [file elife-63003-supp-v1.zip]

A

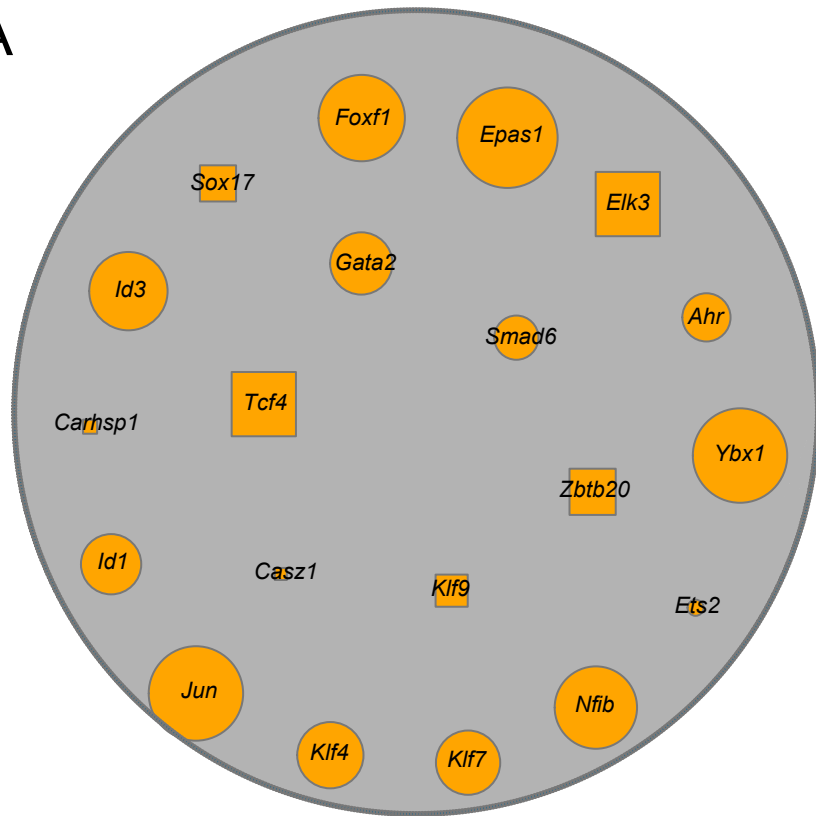

B

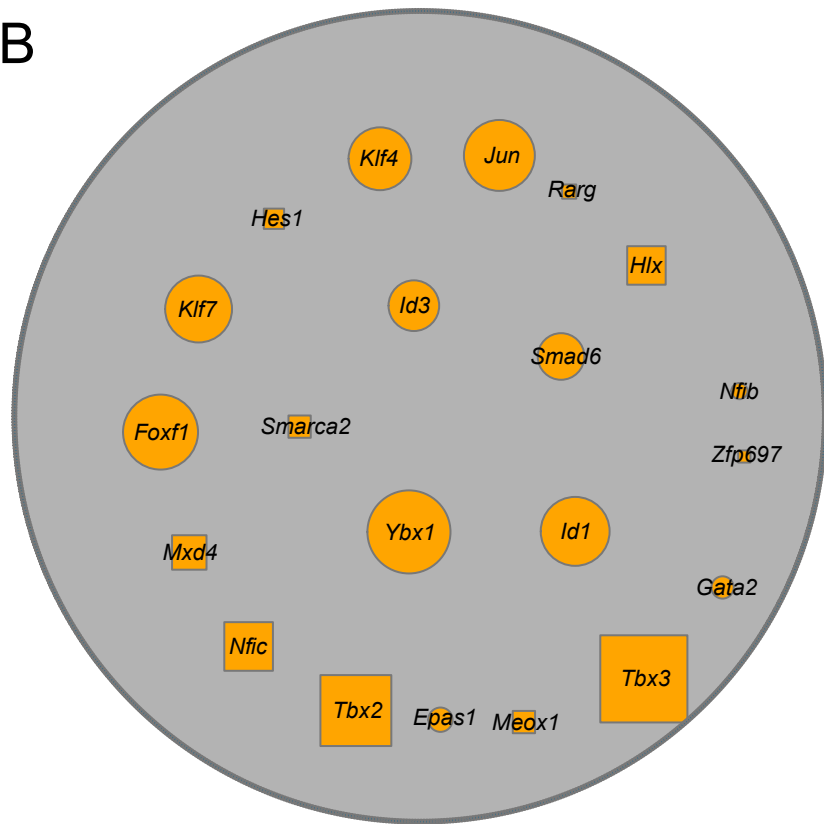

Supplement: supp [file elife-63003-supp-v1.zip]

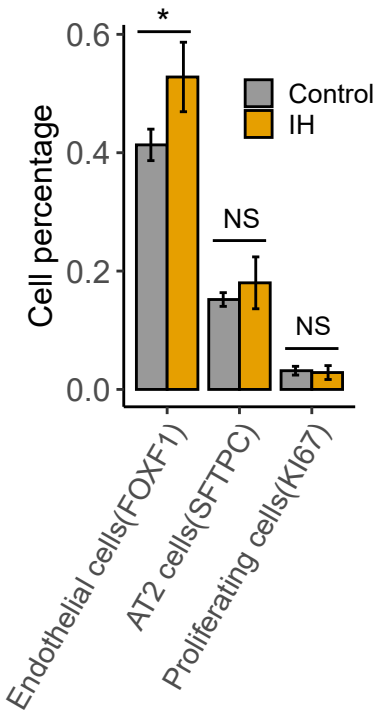

Supplement: supp [file elife-63003-supp-v1.zip]

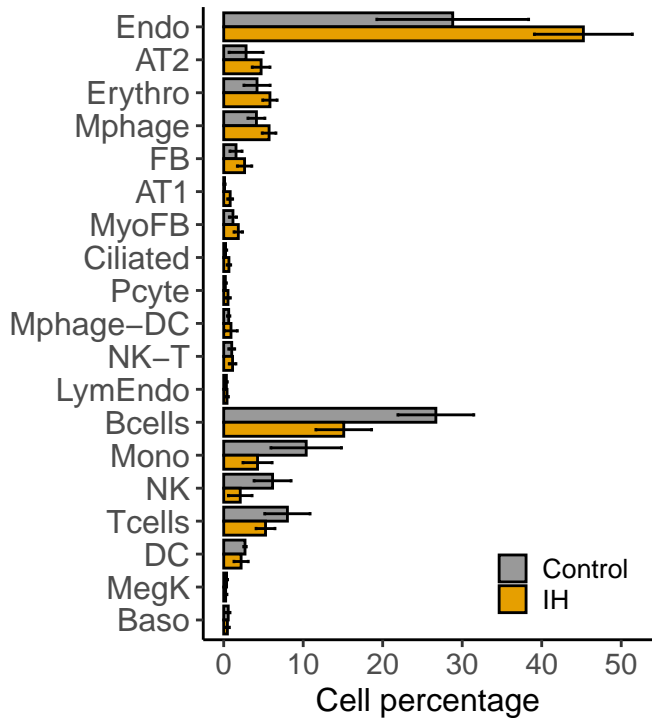

Supplement: supp [file elife-63003-supp-v1.zip]

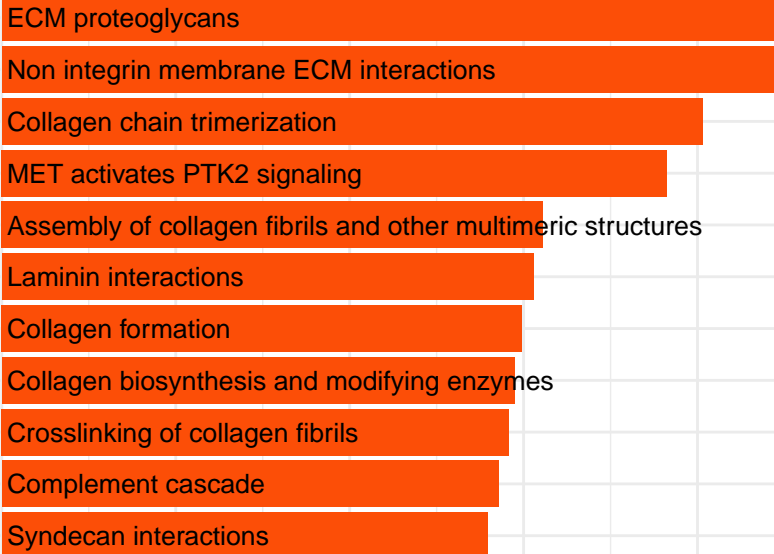

$-\log_{10}(\text{Pvalue})$

Supplement: supp [file elife-63003-supp-v1.zip]

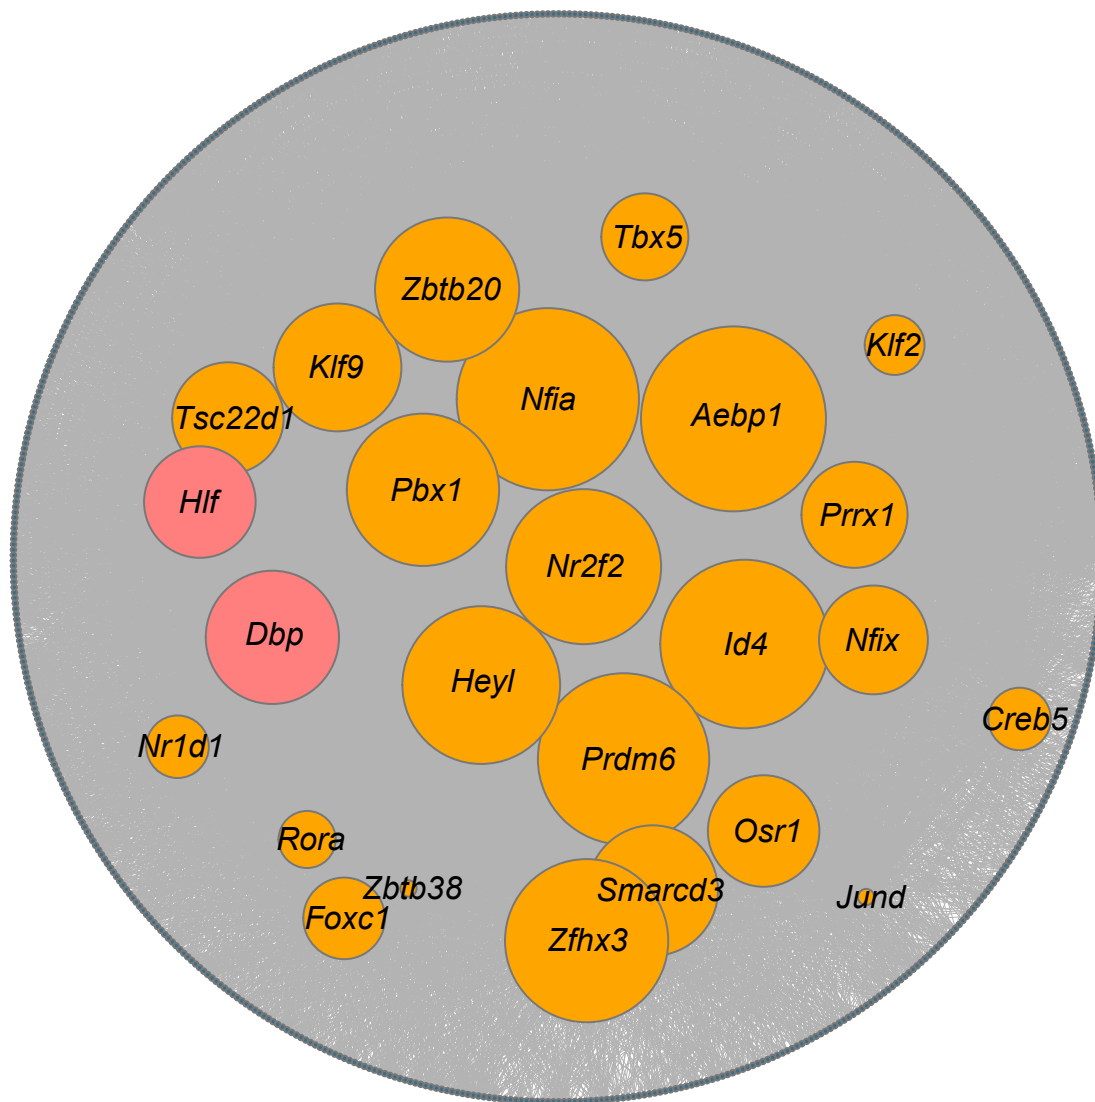

Supplement: supp [file elife-63003-supp-v1.zip]

 Up
  Down

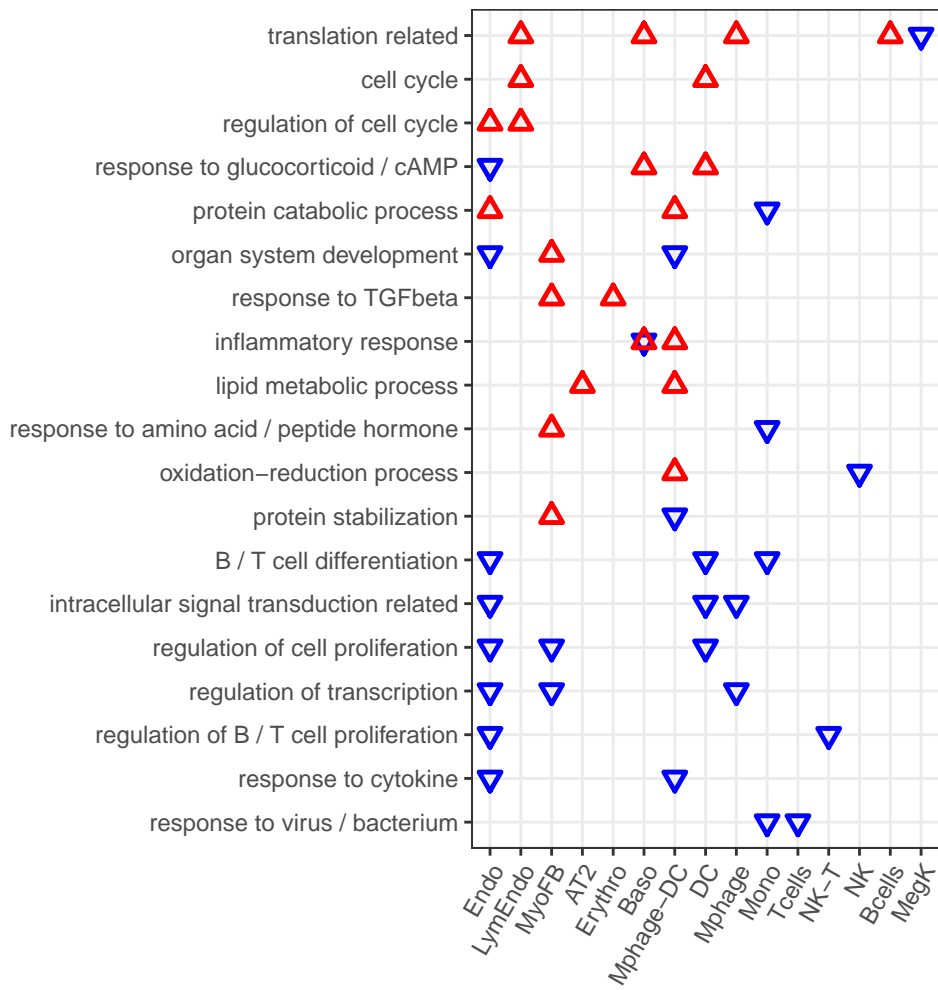

 Up  Down

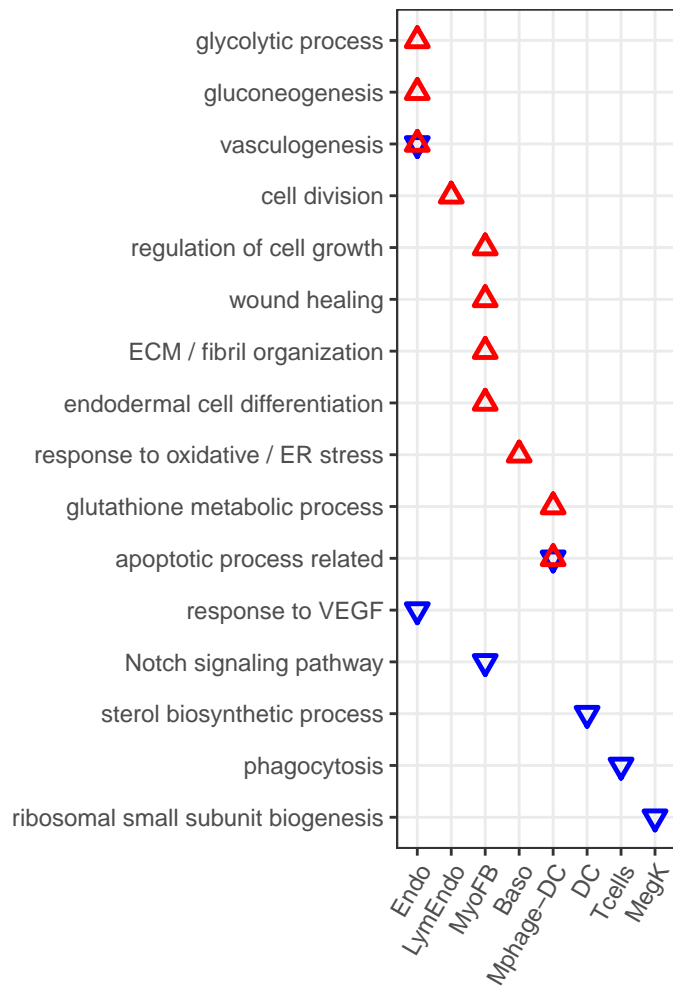

Supplement: supp [file elife-63003-supp-v1.zip]

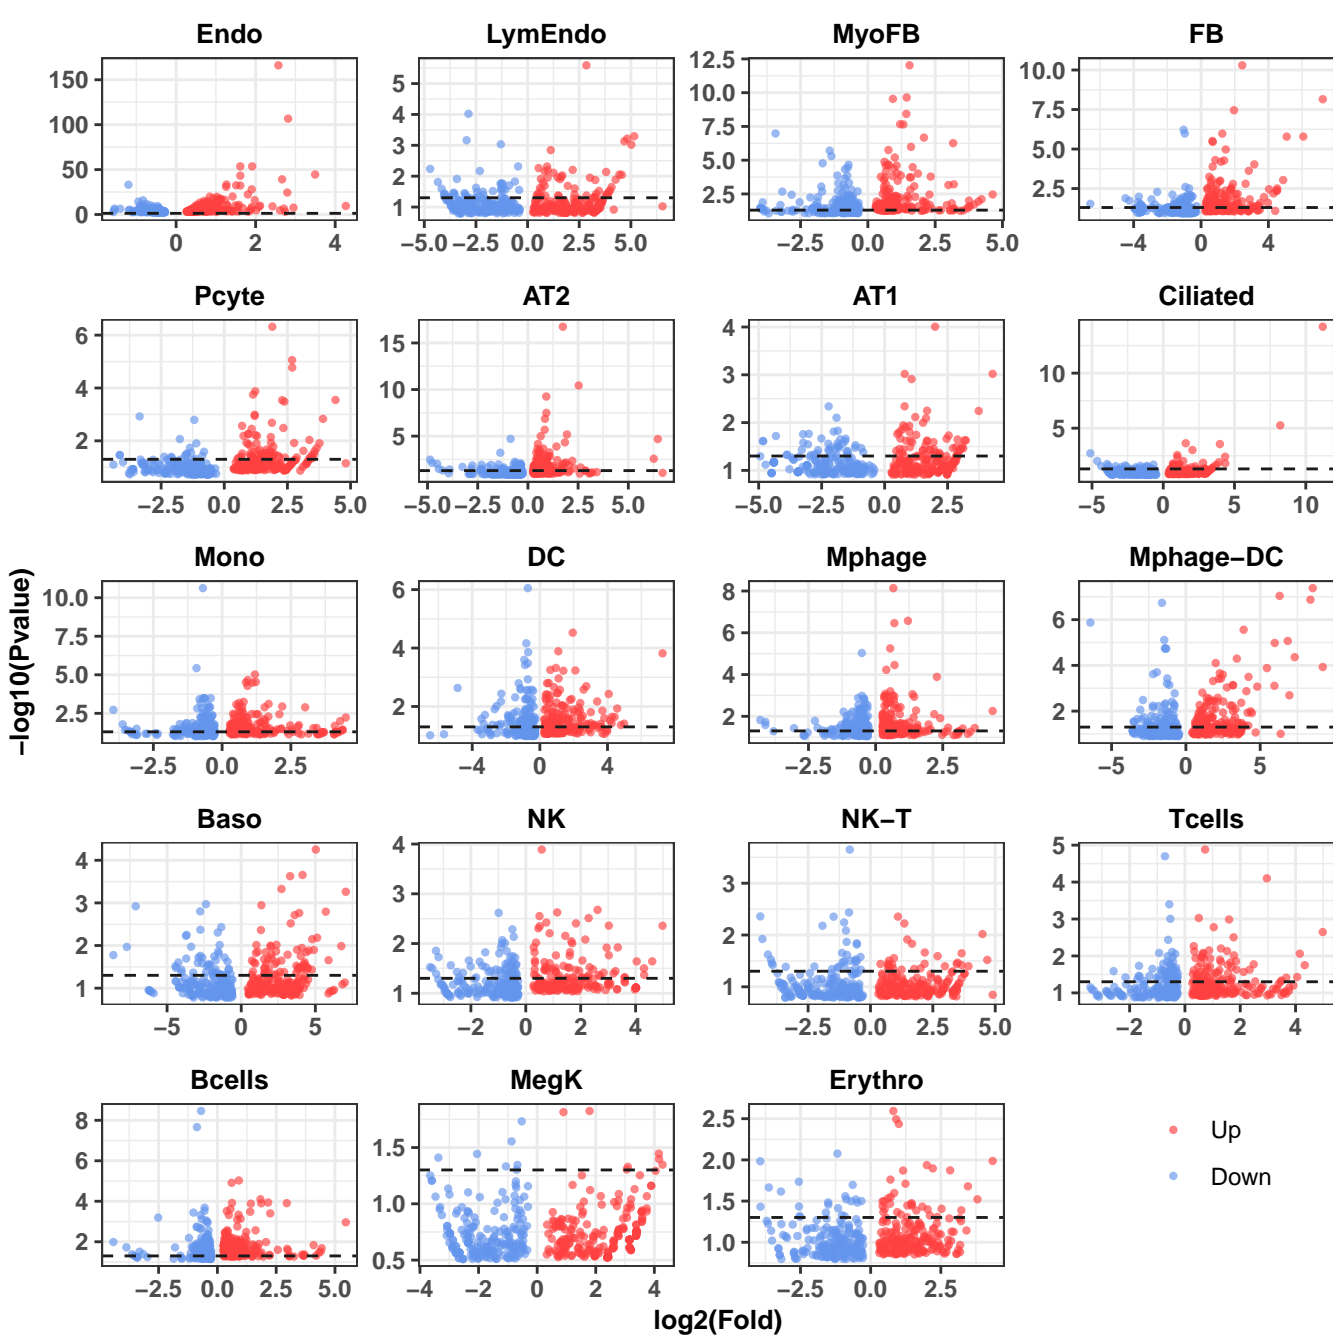

Supplement: supp [file elife-63003-supp-v1.zip]

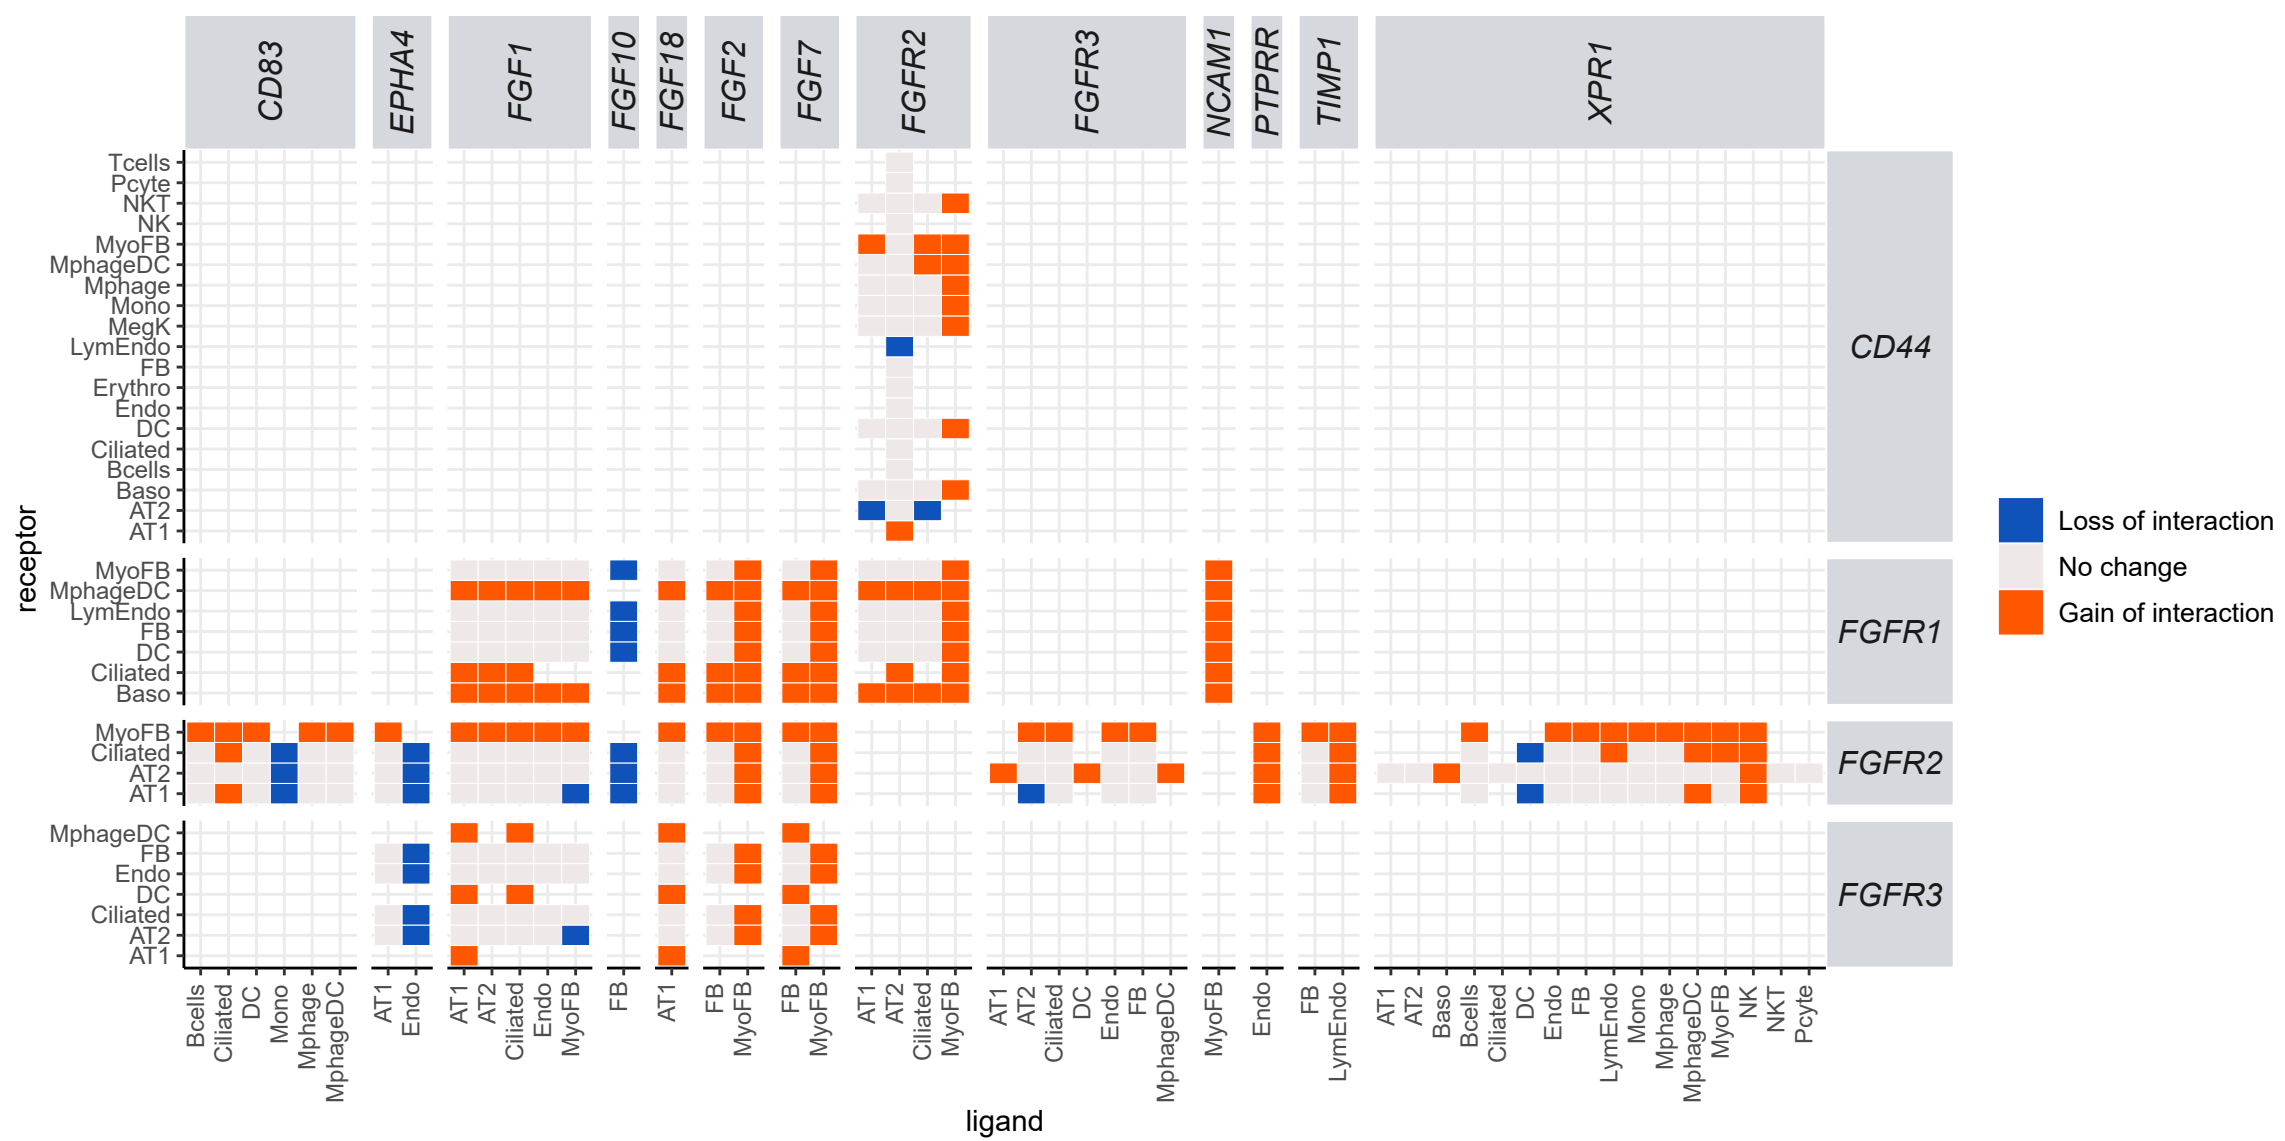

Supplement: supp [file elife-63003-supp-v1.zip]

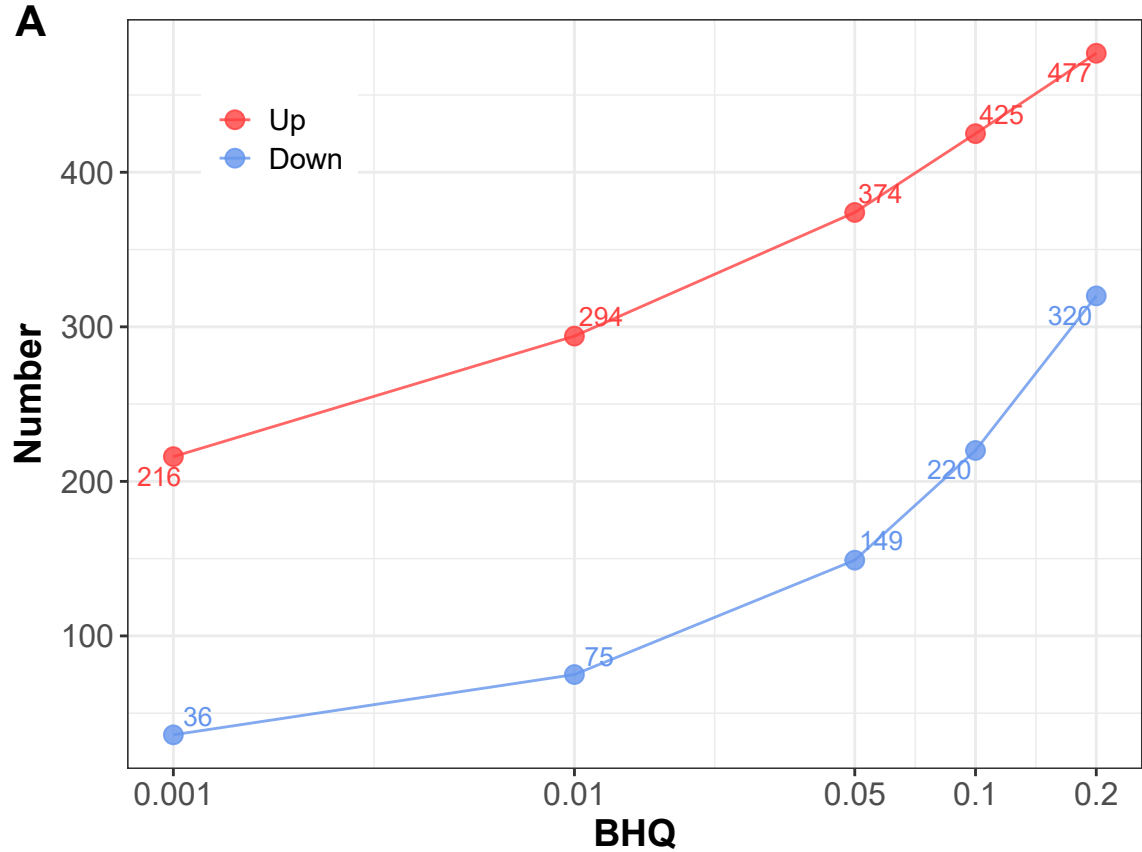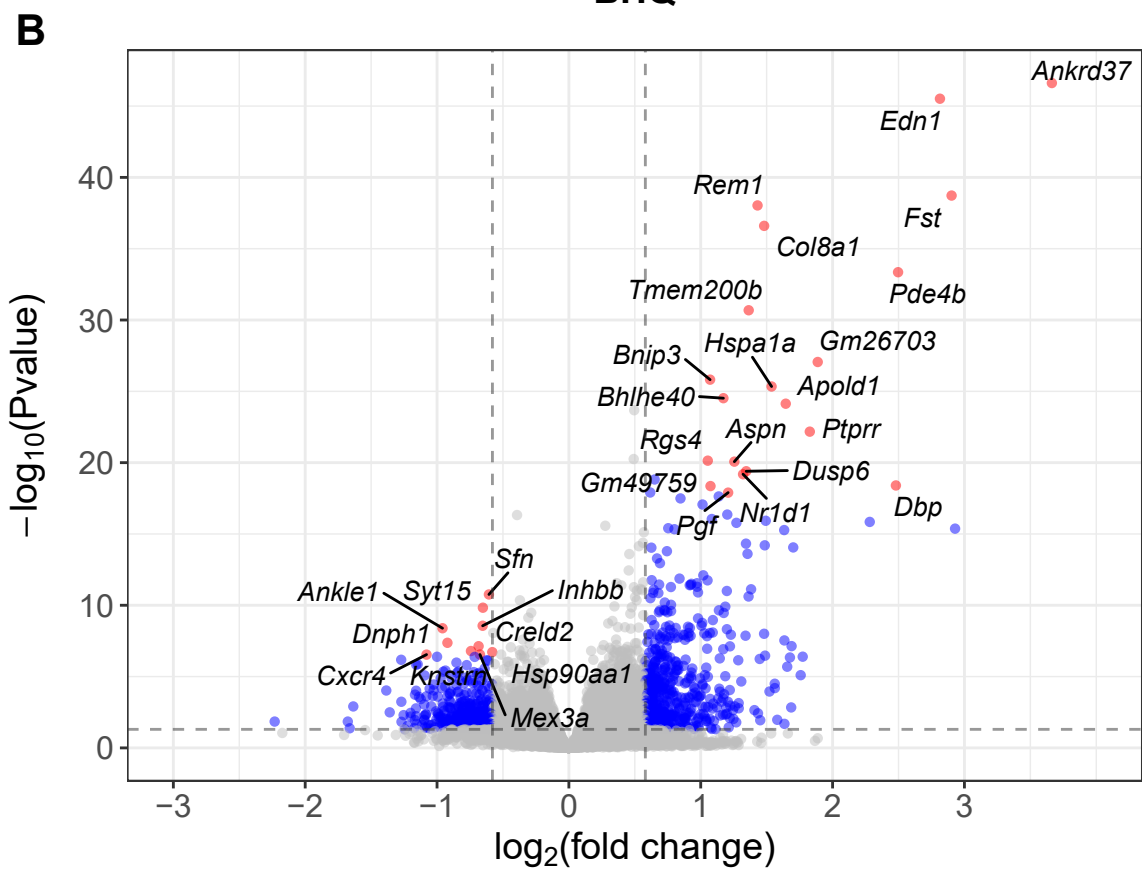

Supplement: supp [file elife-63003-supp-v1.zip]

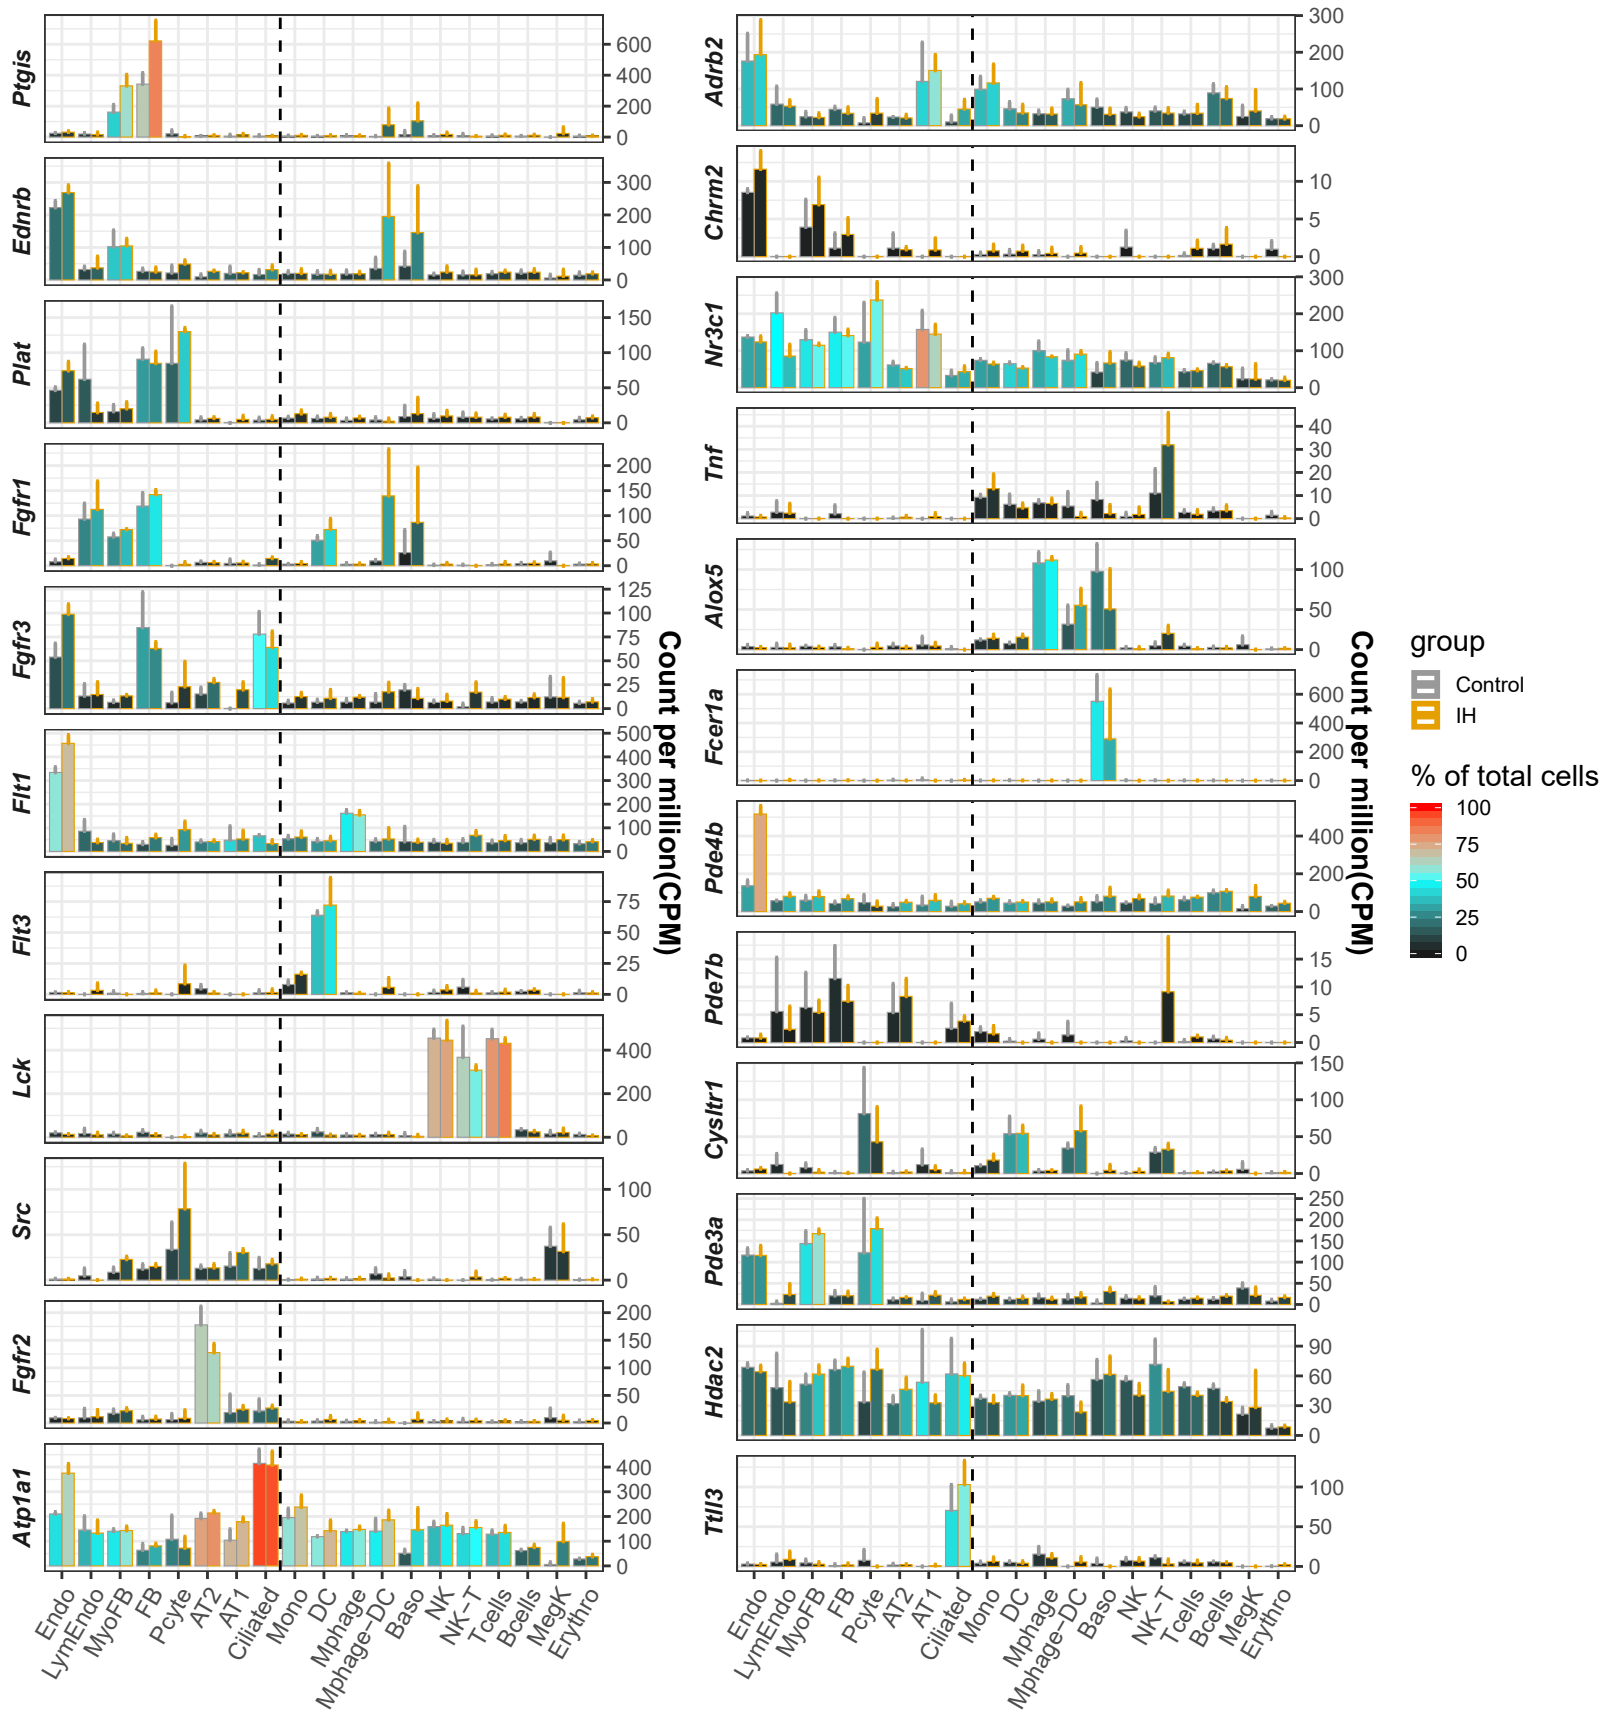

Supplement: supp [file elife-63003-supp-v1.zip]

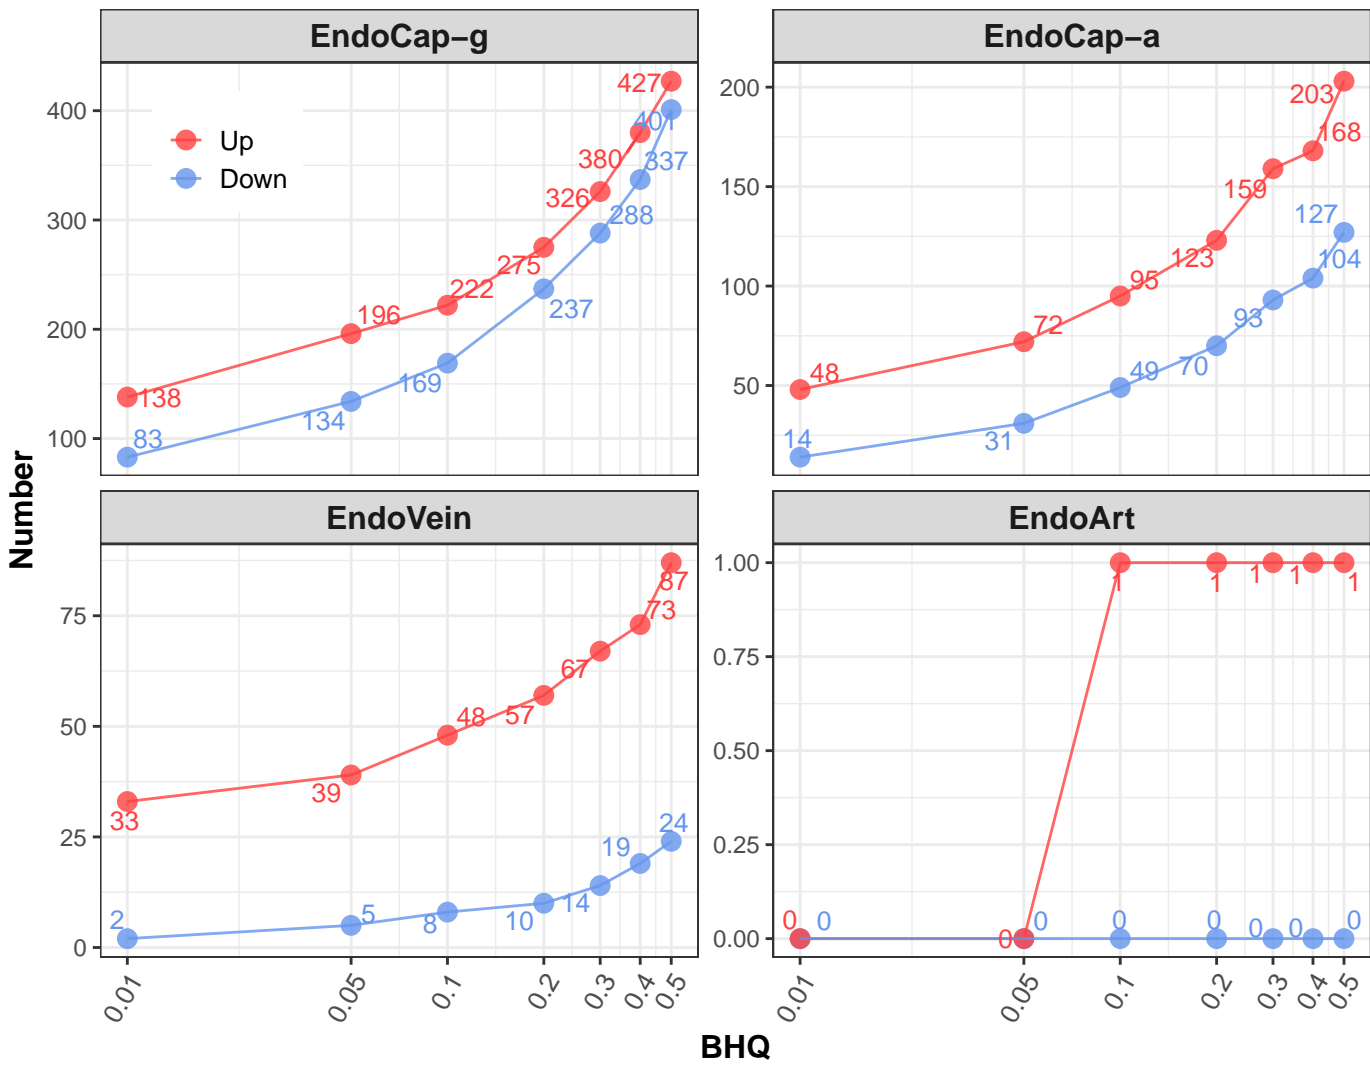

Supplement: supp [file elife-63003-supp-v1.zip]

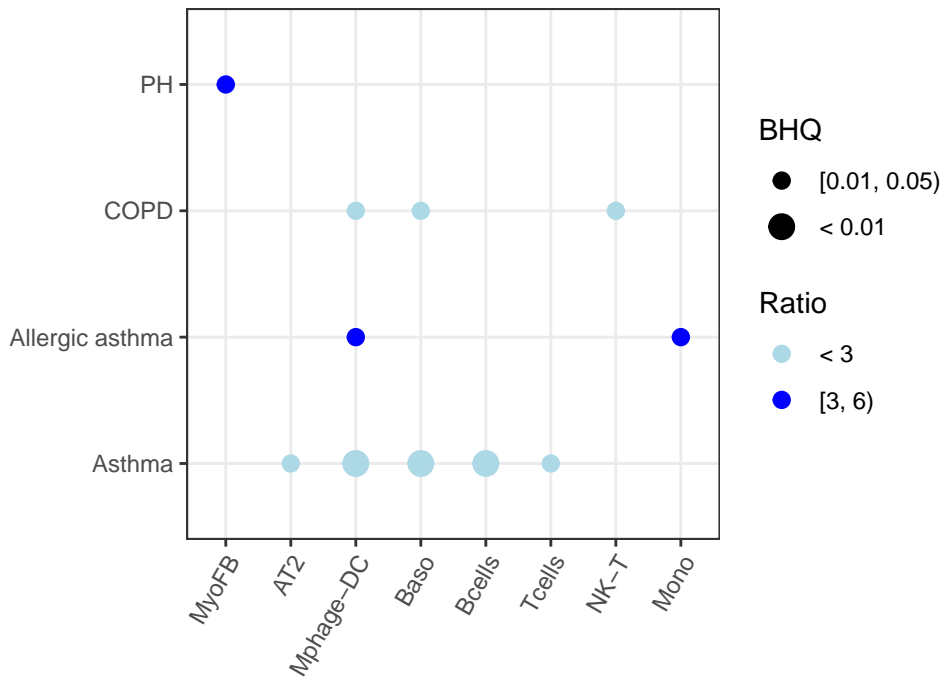

Supplement: supp [file elife-63003-supp-v1.zip]
